# Supplementary material for: Temporal mapping of CEBPA and CEBPB binding during liver regeneration reveals dynamic occupancy and specific regulatory codes for homeostatic and cell cycle gene batteries
Source: HighWire-hosted journal article supplement (doi:10.1101/gr.146399.112), 2013-02-12
Supplement: Supp_Table_S3.xlsx [file Supp_Table_S3.xlsx]

## Sheet: windowsFeatureAnnotated.txt
Jakobsen_Table S3
																						Associated regions of cluster:
chr	start	end	width	alpha_0_max	alpha_3_max	alpha_8_max	alpha_16_max	alpha_24_max	alpha_36_max	alpha_48_max	alpha_168_max	beta_0_max	beta_3_max	beta_8_max	beta_16_max	beta_24_max	beta_36_max	beta_48_max	beta_168_max	summitPosMeans	feature	A	B	C
chr1	59231684	59232126	442	41	36	55	38	40	70	53	65	22	53	41	31	41	102	39	59	5.9232e+07	Als2	TRUE	FALSE	FALSE
chr1	172446297	172446734	437	171	129	152	131	87	111	170	159	248	161	132	131	111	94	135	143	1.72447e+08	Nos1ap	FALSE	FALSE	FALSE
chr1	61696407	61696839	432	79	131	53	130	148	76	16	18	123	46	75	160	142	65	28	20	6.16967e+07	Pard3b	FALSE	FALSE	TRUE
chr1	133095626	133096012	386	70	58	42	32	38	75	41	51	54	89	52	42	62	122	44	62	1.33096e+08	Rassf5	TRUE	FALSE	FALSE
chr1	157921865	157922249	384	49	92	78	64	56	31	83	66	91	111	82	61	58	37	74	57	1.57922e+08	Tor1aip2	FALSE	TRUE	FALSE
chr1	82234814	82235195	381	171	161	62	95	114	66	35	38	180	67	84	113	150	74	27	63	8.2235e+07	Irs1	FALSE	FALSE	FALSE
chr1	158590012	158590367	355	46	56	38	27	21	36	39	41	32	115	52	31	45	84	30	43	1.5859e+08	Tor3a	TRUE	FALSE	FALSE
chr1	155965580	155965934	354	133	65	76	106	49	63	66	81	142	57	69	85	65	62	50	71	1.55966e+08	Zfp648	FALSE	FALSE	TRUE
chr1	93359893	93360245	352	54	86	61	28	46	37	58	90	78	171	70	48	33	32	67	66	9.33601e+07	Per2	FALSE	TRUE	FALSE
chr1	135142302	135142654	352	68	45	70	30	36	87	61	93	40	117	46	24	72	71	45	61	1.35142e+08	Plekha6	TRUE	FALSE	FALSE
chr1	157920403	157920745	342	92	86	104	65	64	46	99	118	72	102	109	53	41	53	101	128	1.57921e+08	Tor1aip2	FALSE	TRUE	FALSE
chr1	166345469	166345810	341	194	106	64	170	185	82	53	50	257	44	85	162	213	92	51	72	1.66346e+08	Nme7	FALSE	FALSE	TRUE
chr1	191971680	191972015	335	37	90	37	49	101	53	22	50	64	85	50	54	104	64	35	61	1.91972e+08	Prox1	FALSE	FALSE	TRUE
chr1	88775435	88775768	333	39	14	16	54	100	39	15	11	33	3	20	65	111	23	13	12	8.87755e+07	Dis3l2	FALSE	FALSE	FALSE
chr1	170292688	170293020	332	147	181	105	268	301	191	76	74	154	83	141	296	315	133	96	80	1.70293e+08	Pbx1	FALSE	FALSE	TRUE
chr1	193078375	193078707	332	214	254	361	207	170	413	439	443	259	763	360	193	237	817	378	422	1.93079e+08	Nenf	TRUE	FALSE	FALSE
chr1	61357326	61357650	324	104	92	61	93	134	64	33	39	127	24	60	88	104	53	34	40	61357468	9530026F06Rik	FALSE	FALSE	TRUE
chr1	45962069	45962391	322	60	92	74	44	43	43	55	98	95	132	88	46	62	48	77	107	4.59623e+07	Slc40a1	FALSE	TRUE	FALSE
chr1	166451760	166452073	313	103	144	66	102	158	91	45	50	95	62	76	91	117	71	45	84	1.66452e+08	Atp1b1	FALSE	FALSE	TRUE
chr1	13566630	13566942	312	34	51	54	16	15	57	45	67	37	110	66	31	22	128	41	55	1.35667e+07	Tram1	TRUE	FALSE	FALSE
chr1	90757561	90757873	312	143	56	74	64	77	32	70	88	160	37	64	44	71	52	59	62	9.07577e+07	2410088K16Rik	FALSE	FALSE	FALSE
chr1	159456840	159457150	310	79	58	78	46	73	68	79	95	104	88	84	59	60	58	67	99	1.59457e+08	Sec16b	FALSE	FALSE	FALSE
chr1	182160168	182160478	310	85	72	65	75	72	85	59	67	64	88	58	78	71	134	46	57	1.8216e+08	Psen2	TRUE	FALSE	FALSE
chr1	192994604	192994908	304	167	129	100	57	90	97	90	98	122	79	119	67	86	73	92	91	1.92995e+08	Atf3	FALSE	FALSE	FALSE
chr1	173190609	173190911	302	63	49	39	59	94	33	27	34	101	38	46	49	95	55	28	51	1.73191e+08	Adamts4	FALSE	FALSE	TRUE
chr1	51816548	51816849	301	169	220	110	142	87	85	73	116	198	278	153	125	94	134	87	148	5.18167e+07	Myo1b	FALSE	TRUE	FALSE
chr1	168211524	168211822	298	55	58	23	79	46	28	15	14	115	25	30	63	74	28	21	19	1.68212e+08	Ildr2	FALSE	FALSE	TRUE
chr1	20048406	20048701	295	13	60	28	6	3	23	22	36	19	155	32	12	18	60	25	30	2.00485e+07	Pkhd1	FALSE	TRUE	FALSE
chr1	74331427	74331721	294	36	37	38	89	35	57	61	34	48	113	42	79	59	148	49	41	7.43316e+07	Pnkd	TRUE	FALSE	FALSE
chr1	172426433	172426725	292	95	118	119	75	77	142	123	137	70	162	99	53	76	153	91	105	1.72427e+08	Nos1ap	TRUE	FALSE	FALSE
chr1	37625314	37625605	291	70	76	35	80	85	31	25	30	67	41	54	86	114	44	25	33	3.76254e+07	Mgat4a	FALSE	FALSE	TRUE
chr1	44199595	44199885	290	24	64	70	115	63	83	68	67	66	60	100	113	80	60	77	108	44199785	Bivm	FALSE	FALSE	FALSE
chr1	193906563	193906851	288	64	42	33	104	93	63	45	34	88	55	42	81	79	58	38	42	1.93907e+08	Traf5	FALSE	FALSE	TRUE
chr1	36613449	36613728	279	13	25	44	46	7	51	52	51	27	128	54	39	18	130	67	51	3.66135e+07	Sema4c	TRUE	FALSE	FALSE
chr1	40284607	40284886	279	26	6	18	96	72	55	18	24	92	7	17	83	101	44	20	19	4.02847e+07	Il1r1	FALSE	FALSE	FALSE
chr1	65224059	65224337	278	100	22	35	95	113	75	21	40	122	12	44	82	159	57	40	45	6.52242e+07	Idh1	FALSE	FALSE	TRUE
chr1	153091249	153091527	278	92	72	70	38	43	34	53	56	101	68	60	45	35	37	42	40	153091361	Ivns1abp	FALSE	FALSE	FALSE
chr1	180260209	180260485	276	98	65	66	55	68	41	43	67	157	34	60	56	71	44	52	54	1.8026e+08	Hnrnpu	FALSE	FALSE	TRUE
chr1	37398228	37398503	275	74	130	186	52	60	99	207	258	132	348	151	53	72	182	166	150	3.73984e+07	Inpp4a	FALSE	TRUE	FALSE
chr1	58439464	58439736	272	32	42	35	20	17	34	34	35	26	107	37	23	22	58	31	40	5.84397e+07	Bzw1	TRUE	FALSE	FALSE
chr1	88339504	88339773	269	49	71	103	64	52	173	130	116	60	235	100	64	58	276	107	113	8.83396e+07	1700019O17Rik	TRUE	FALSE	FALSE
chr1	95698460	95698729	269	43	58	64	59	41	98	63	83	48	118	61	43	61	131	68	61	9.56986e+07	Dtymk	TRUE	FALSE	FALSE
chr1	171096223	171096490	267	97	28	19	82	71	57	10	28	146	19	20	64	89	26	15	21	1.71096e+08	Nuf2	FALSE	FALSE	TRUE
chr1	195099105	195099370	265	84	63	67	79	29	85	79	78	50	281	60	49	34	182	62	75	1.95099e+08	G0s2	TRUE	FALSE	FALSE
chr1	21230393	21230657	264	160	73	39	98	114	70	22	40	190	26	50	109	112	67	32	47	2.12305e+07	Gsta3	FALSE	FALSE	TRUE
chr1	59470205	59470469	264	93	84	72	51	90	56	35	89	103	58	99	67	79	62	43	109	5.94704e+07	Fzd7	FALSE	FALSE	FALSE
chr1	72838853	72839117	264	161	90	70	149	167	68	53	88	121	96	104	126	183	97	75	116	7.2839e+07	Igfbp2	FALSE	FALSE	TRUE
chr1	90108398	90108662	264	94	125	80	106	95	78	62	97	148	132	94	101	90	123	56	118	9.01085e+07	Ugt1a1	FALSE	FALSE	FALSE
chr1	167440237	167440501	264	97	103	63	47	24	41	45	88	153	156	63	45	21	30	44	80	1.6744e+08	Adcy10	FALSE	TRUE	FALSE
chr1	162519149	162519412	263	38	17	16	119	85	66	19	22	65	16	36	89	89	53	41	25	162519271	Rabgap1l	FALSE	FALSE	TRUE
chr1	168210651	168210914	263	84	78	63	73	106	68	65	71	108	84	84	78	95	56	77	82	1.68211e+08	Ildr2	FALSE	FALSE	TRUE
chr1	185778068	185778331	263	22	110	33	50	60	33	13	16	44	45	62	83	82	27	15	13	1.85778e+08	1700056E22Rik	FALSE	FALSE	TRUE
chr1	52874319	52874579	260	43	53	64	154	29	64	91	65	31	232	67	84	47	219	66	94	5.28745e+07	Inpp1	TRUE	FALSE	FALSE
chr1	138595128	138595388	260	303	269	256	200	259	148	197	274	360	236	282	219	238	162	246	321	1.38595e+08	Gm16880	FALSE	FALSE	FALSE
chr1	181803972	181804232	260	61	43	35	111	91	22	31	38	67	39	37	66	71	36	37	24	1.81804e+08	Ahctf1	FALSE	FALSE	TRUE
chr1	132575235	132575494	259	163	98	76	160	273	179	57	100	130	14	86	176	383	116	68	57	1.32575e+08	C4bp-ps1	FALSE	FALSE	FALSE
chr1	157380305	157380564	259	59	93	74	87	98	66	49	97	93	95	97	95	97	68	75	101	1.5738e+08	Acbd6	FALSE	FALSE	TRUE
chr1	39124863	39125121	258	102	64	36	64	59	26	15	17	122	32	49	62	57	22	18	48	3.9125e+07	Pdcl3	FALSE	FALSE	TRUE
chr1	134034902	134035159	257	14	56	37	16	7	52	35	42	57	108	42	25	26	120	41	37	1.34035e+08	Cdk18	TRUE	FALSE	FALSE
chr1	74237026	74237282	256	195	240	241	112	101	158	224	308	201	519	243	127	128	185	239	255	7.42372e+07	Cxcr1	FALSE	TRUE	FALSE
chr1	191958868	191959123	255	227	160	71	198	200	114	47	54	137	67	101	178	189	114	42	93	1.91959e+08	Prox1	FALSE	FALSE	TRUE
chr1	31129992	31130246	254	92	89	55	64	54	47	39	66	149	82	83	77	55	47	59	97	3.113e+07	Lgsn	FALSE	FALSE	FALSE
chr1	95328789	95329043	254	84	134	60	39	40	28	51	78	93	73	67	34	66	25	54	62	9.53289e+07	Hdlbp	FALSE	FALSE	TRUE
chr1	55230689	55230941	252	44	80	65	66	33	58	55	94	48	111	73	53	69	91	55	85	5.52308e+07	Rftn2	TRUE	FALSE	FALSE
chr1	69020389	69020641	252	210	98	59	161	183	67	37	56	308	52	73	122	137	58	42	46	6.90205e+07	Erbb4	FALSE	FALSE	TRUE
chr1	59439880	59440131	251	94	68	49	35	57	28	41	54	152	25	76	36	54	39	51	91	5.944e+07	Fzd7	FALSE	FALSE	FALSE
chr1	155879855	155880106	251	13	80	30	8	5	35	39	34	35	203	45	17	14	50	46	30	1.5588e+08	Glul	FALSE	TRUE	FALSE
chr1	35823155	35823405	250	29	64	56	20	29	28	50	58	29	108	48	23	22	22	34	53	3.58233e+07	Hs6st1	FALSE	TRUE	FALSE
chr1	160432186	160432436	250	13	35	40	27	22	61	55	46	20	114	37	27	26	105	51	24	1.60432e+08	Astn1	TRUE	FALSE	FALSE
chr1	67124433	67124682	249	91	66	43	98	113	56	36	53	87	50	67	71	151	111	55	72	6.71246e+07	Lancl1	FALSE	FALSE	FALSE
chr1	82029004	82029252	248	20	9	19	38	86	59	17	30	50	15	22	64	109	44	15	26	8.20291e+07	Irs1	FALSE	FALSE	FALSE
chr1	72381516	72381763	247	232	171	124	151	213	68	107	124	171	79	135	95	122	93	78	118	7.23816e+07	Xrcc5	FALSE	FALSE	FALSE
chr1	88515368	88515615	247	85	73	56	28	47	21	48	75	109	93	67	31	47	27	57	55	8.85155e+07	Cops7b	FALSE	FALSE	FALSE
chr1	169317525	169317772	247	86	89	65	47	82	44	47	65	129	56	84	64	101	39	55	96	1.69318e+08	Mgst3	FALSE	FALSE	FALSE
chr1	50739776	50740022	246	140	58	38	133	159	94	29	45	184	17	52	131	156	53	38	45	5.07399e+07	Tmeff2	FALSE	FALSE	TRUE
chr1	82199342	82199588	246	58	151	53	135	53	39	30	37	37	148	100	128	48	40	30	65	8.21995e+07	Irs1	FALSE	FALSE	TRUE
chr1	184217862	184218108	246	95	98	70	53	34	58	59	76	100	140	77	44	72	80	49	80	1.84218e+08	Degs1	FALSE	TRUE	FALSE
chr1	186696002	186696248	246	92	76	124	70	77	124	103	148	162	182	121	118	93	156	97	151	1.86696e+08	C130074G19Rik	FALSE	TRUE	FALSE
chr1	134230378	134230623	245	22	30	55	26	14	44	60	73	55	102	51	21	31	110	47	66	134230494	Nuak2	TRUE	FALSE	FALSE
chr1	168308817	168309062	245	76	92	40	53	84	48	36	33	107	104	44	56	86	79	43	39	168308992	Tada1	FALSE	FALSE	TRUE
chr1	33790932	33791176	244	81	98	77	91	62	44	65	101	76	174	89	70	77	71	71	93	33791035	Rab23	FALSE	TRUE	FALSE
chr1	94607014	94607258	244	18	40	22	15	28	30	21	29	40	104	34	16	22	82	26	32	9.46071e+07	Otos	TRUE	FALSE	FALSE
chr1	157046773	157047017	244	125	63	44	58	102	61	33	45	181	18	64	96	127	58	46	60	1.57047e+08	Stx6	FALSE	FALSE	TRUE
chr1	166088762	166089006	244	127	55	43	145	114	59	27	55	114	22	54	95	127	67	47	50	1.66089e+08	F5	FALSE	FALSE	TRUE
chr1	182864046	182864290	244	156	83	67	183	116	136	57	61	78	49	73	127	102	69	50	57	182864173	Lefty1	FALSE	FALSE	FALSE
chr1	186706846	186707090	244	74	88	113	361	75	134	154	118	97	436	139	213	82	394	159	158	1.86707e+08	C130074G19Rik	TRUE	FALSE	FALSE
chr1	91566506	91566749	243	69	49	71	55	65	82	83	88	47	117	76	44	108	171	74	101	9.15666e+07	Agap1	TRUE	FALSE	FALSE
chr1	104630663	104630906	243	18	9	16	62	143	68	12	26	22	6	23	55	158	35	15	11	1.04631e+08	Gm20268	FALSE	FALSE	FALSE
chr1	120231638	120231881	243	176	164	149	170	140	73	148	167	237	145	153	147	143	78	118	133	1.20232e+08	Mki67ip	FALSE	FALSE	FALSE
chr1	136311347	136311590	243	153	71	56	99	89	78	37	56	175	27	68	86	98	62	46	74	1.36312e+08	Adipor1	FALSE	FALSE	TRUE
chr1	59425072	59425314	242	46	63	65	32	25	80	77	88	49	123	55	29	49	161	57	65	5.94252e+07	Cdk15	TRUE	FALSE	FALSE
chr1	92131259	92131501	242	359	317	239	215	283	171	176	229	323	137	240	273	270	161	166	198	9.21314e+07	Cxcr7	FALSE	FALSE	FALSE
chr1	92697750	92697992	242	30	34	47	43	25	41	58	53	22	101	49	32	28	103	61	44	9.26979e+07	Col6a3	TRUE	FALSE	FALSE
chr1	132656476	132656718	242	31	100	58	101	62	38	58	42	28	144	82	106	81	68	59	55	1.32657e+08	AA986860	FALSE	TRUE	FALSE
chr1	178748969	178749211	242	149	131	126	187	103	66	118	154	163	125	114	122	76	95	107	95	1.78749e+08	Sdccag8	FALSE	FALSE	TRUE
chr1	60655889	60656130	241	311	277	178	182	200	80	148	122	377	124	196	152	162	78	105	186	6.0656e+07	Raph1	FALSE	FALSE	FALSE
chr1	59136832	59137072	240	99	75	38	32	51	29	22	40	115	59	58	42	50	16	14	49	5.9137e+07	Als2cr11	FALSE	FALSE	TRUE
chr1	121114416	121114656	240	25	88	60	23	12	36	81	41	15	188	61	25	18	59	65	40	1.21114e+08	Gli2	FALSE	TRUE	FALSE
chr1	121563548	121563785	237	610	583	245	479	462	242	152	208	694	212	283	416	451	177	182	115	1.21564e+08	Ptpn4	FALSE	FALSE	TRUE
chr1	136390933	136391170	237	54	42	45	100	43	74	53	40	81	68	58	115	52	109	54	42	1.36391e+08	Rabif	TRUE	FALSE	FALSE
chr1	157673144	157673381	237	75	83	54	159	157	64	44	64	94	38	70	176	187	105	56	46	1.57673e+08	Qsox1	FALSE	FALSE	FALSE
chr1	164822269	164822506	237	40	92	23	67	86	63	17	11	44	31	41	53	107	54	32	17	1.64822e+08	Fmo2	FALSE	FALSE	TRUE
chr1	74819729	74819965	236	54	21	48	159	51	85	73	27	68	35	42	168	54	65	57	26	7.48198e+07	Wnt6	TRUE	FALSE	FALSE
chr1	155538225	155538461	236	246	183	117	101	106	46	89	121	193	112	147	107	76	72	108	131	1.55538e+08	Rgs8	FALSE	FALSE	FALSE
chr1	166083050	166083286	236	124	31	66	186	240	181	64	101	156	13	76	173	237	135	75	114	1.66083e+08	Gm16548	FALSE	FALSE	FALSE
chr1	196573062	196573298	236	69	79	128	101	86	114	158	130	43	88	114	72	89	119	127	137	1.96573e+08	Plxna2	FALSE	FALSE	FALSE
chr1	39082146	39082381	235	117	86	94	64	40	31	73	114	143	218	88	52	38	49	78	91	3.90822e+07	Pdcl3	FALSE	TRUE	FALSE
chr1	89470520	89470755	235	82	58	67	42	46	98	85	72	125	97	67	48	53	118	74	67	8.94707e+07	Neu2	FALSE	TRUE	FALSE
chr1	172963960	172964195	235	61	22	85	84	30	90	138	62	66	106	62	65	34	129	77	55	1.72964e+08	Fcgr4	TRUE	FALSE	FALSE
chr1	183187096	183187331	235	22	71	66	28	17	41	75	75	26	229	61	35	26	102	46	64	1.83187e+08	Wdr26	FALSE	TRUE	FALSE
chr1	71934390	71934624	234	140	138	186	108	129	175	224	215	191	240	168	107	128	178	169	175	7.19345e+07	Gm8883	FALSE	TRUE	FALSE
chr1	73979249	73979483	234	55	80	89	26	21	95	89	122	41	186	84	36	51	120	99	76	7.39794e+07	Tns1	FALSE	TRUE	FALSE
chr1	155198242	155198476	234	47	173	80	154	140	78	47	39	74	78	125	207	167	67	62	31	1.55198e+08	Lamc1	FALSE	FALSE	TRUE
chr1	193642039	193642273	234	30	73	72	45	28	58	90	73	57	254	59	57	24	98	54	49	1.93642e+08	Nek2	FALSE	TRUE	FALSE
chr1	31090774	31091007	233	95	76	49	144	154	75	49	42	197	35	56	114	163	70	35	49	31090912	Ptp4a1	FALSE	FALSE	TRUE
chr1	162908594	162908827	233	145	69	154	88	116	85	157	192	197	106	112	61	95	70	134	112	1.62909e+08	Serpinc1	FALSE	TRUE	FALSE
chr1	192646565	192646798	233	120	100	57	44	38	52	28	70	164	66	69	56	39	42	37	76	1.92647e+08	Rps6kc1	FALSE	FALSE	FALSE
chr1	135263651	135263883	232	57	51	63	58	46	58	77	80	64	94	69	43	78	144	88	76	1.35264e+08	Etnk2	TRUE	FALSE	FALSE
chr1	183187800	183188032	232	161	141	156	79	119	73	165	153	213	169	181	92	86	79	167	204	1.83188e+08	Wdr26	FALSE	FALSE	FALSE
chr1	90184008	90184239	231	105	46	40	180	81	64	33	51	197	27	47	125	107	68	30	53	9.01842e+07	Hjurp	FALSE	FALSE	TRUE
chr1	135260015	135260246	231	40	95	67	126	25	60	60	75	20	366	68	93	45	254	65	59	1.3526e+08	Etnk2	TRUE	FALSE	FALSE
chr1	36123130	36123360	230	118	122	131	77	92	95	162	144	87	189	132	85	108	93	123	130	3.61232e+07	Hs6st1	FALSE	TRUE	FALSE
chr1	60400322	60400552	230	49	54	58	180	29	92	71	59	44	197	62	149	50	167	59	73	6.04004e+07	Cyp20a1	TRUE	FALSE	FALSE
chr1	67163154	67163384	230	261	117	109	302	278	171	81	124	224	64	119	234	270	146	99	101	6.71633e+07	Cps1	FALSE	FALSE	TRUE
chr1	74091120	74091350	230	34	61	56	56	54	32	49	70	34	155	66	61	55	93	62	53	7.40912e+07	Tns1	TRUE	FALSE	FALSE
chr1	82177049	82177279	230	87	63	62	121	118	73	45	75	88	82	75	120	111	112	59	93	8.21771e+07	Irs1	FALSE	FALSE	FALSE
chr1	193901003	193901233	230	113	74	61	128	78	49	45	54	76	60	82	112	95	39	63	70	1.93901e+08	Traf5	FALSE	FALSE	TRUE
chr1	20810398	20810627	229	168	117	80	78	63	51	59	62	154	108	98	80	55	73	80	105	2.08105e+07	Mcm3	FALSE	FALSE	FALSE
chr1	52176550	52176779	229	117	201	121	154	84	161	134	130	143	394	136	166	98	216	141	161	5.21766e+07	Stat1	FALSE	TRUE	FALSE
chr1	155526289	155526518	229	85	69	94	39	35	117	106	114	76	159	89	54	56	182	80	89	1.55526e+08	Rgs8	TRUE	FALSE	FALSE
chr1	173347301	173347530	229	77	91	74	62	46	52	76	85	59	120	71	45	50	75	56	84	1.73347e+08	Tstd1	FALSE	TRUE	FALSE
chr1	191999421	191999650	229	30	34	35	39	11	36	51	32	10	150	35	29	24	125	33	30	1.91999e+08	Prox1	TRUE	FALSE	FALSE
chr1	13477923	13478151	228	47	51	91	43	25	131	94	124	109	129	80	35	58	215	70	105	1.3478e+07	Tram1	TRUE	FALSE	FALSE
chr1	99667657	99667885	228	50	75	81	132	183	132	95	84	46	108	89	106	149	80	108	60	9.96678e+07	Gin1	FALSE	FALSE	FALSE
chr1	133837519	133837747	228	50	87	55	107	93	39	46	34	45	89	49	91	81	64	27	30	1.33838e+08	Slc45a3	FALSE	TRUE	FALSE
chr1	189065221	189065449	228	152	155	89	143	158	87	88	89	213	207	116	160	182	119	94	84	1.89065e+08	Gpatch2	FALSE	FALSE	TRUE
chr1	40173319	40173546	227	18	58	52	41	23	26	61	60	13	101	62	28	20	30	79	47	4.01735e+07	Il1r2	FALSE	TRUE	FALSE
chr1	155837844	155838071	227	35	68	65	25	27	41	58	80	74	105	59	30	16	76	40	79	155837973	Glul	FALSE	TRUE	FALSE
chr1	195152759	195152986	227	36	80	67	45	34	67	52	82	31	169	59	50	51	84	35	82	1.95153e+08	Lamb3	FALSE	TRUE	FALSE
chr1	40237777	40238003	226	71	57	73	37	27	74	73	86	101	56	70	32	42	59	67	68	4.02379e+07	Il1r1	FALSE	TRUE	FALSE
chr1	59029787	59030013	226	9	37	36	12	7	12	29	48	40	110	35	9	7	44	39	33	5.90299e+07	Trak2	TRUE	FALSE	FALSE
chr1	171461556	171461782	226	18	32	41	19	17	57	49	45	33	144	44	25	24	121	37	50	1.71462e+08	Nuf2	TRUE	FALSE	FALSE
chr1	172620051	172620277	226	52	175	86	86	125	61	71	79	110	112	102	90	103	88	61	78	1.7262e+08	Olfml2b	FALSE	FALSE	TRUE
chr1	182778734	182778960	226	18	120	50	63	30	56	68	51	21	298	70	109	29	83	54	62	1.82779e+08	BC031781	FALSE	TRUE	FALSE
chr1	188559545	188559771	226	8	138	26	14	12	13	10	17	0	116	50	14	6	8	18	9	1.8856e+08	Rrp15	FALSE	FALSE	TRUE
chr1	84299454	84299679	225	38	89	37	128	64	17	17	31	14	53	58	92	43	31	41	29	8.42996e+07	Pid1	FALSE	FALSE	TRUE
chr1	99665839	99666064	225	71	218	166	44	65	116	187	211	78	579	172	51	86	191	141	186	9.96659e+07	Ppip5k2	FALSE	TRUE	FALSE
chr1	104414683	104414908	225	16	3	21	60	99	46	21	31	11	3	27	76	147	77	32	23	1.04415e+08	Gm20268	FALSE	FALSE	FALSE
chr1	135244209	135244434	225	32	58	42	20	36	26	30	61	28	185	45	24	32	46	31	49	135244350	Ren2	FALSE	TRUE	FALSE
chr1	172815536	172815761	225	20	61	29	27	11	35	37	33	20	125	35	30	33	100	29	35	1.72816e+08	Dusp12	TRUE	FALSE	FALSE
chr1	186302009	186302234	225	77	116	72	59	66	53	37	82	83	115	96	68	72	61	62	95	1.86302e+08	1700112H15Rik	FALSE	TRUE	FALSE
chr1	74104102	74104326	224	29	93	31	8	3	10	24	41	43	163	43	14	7	17	23	33	7.41042e+07	Tns1	FALSE	TRUE	FALSE
chr1	84034798	84035022	224	16	44	35	24	33	19	33	45	28	150	35	21	22	36	25	37	8.40349e+07	Pid1	FALSE	TRUE	FALSE
chr1	173355281	173355505	224	83	108	46	76	89	38	33	42	70	91	89	76	67	56	78	61	1.73355e+08	Tstd1	FALSE	FALSE	TRUE
chr1	60628555	60628778	223	55	56	37	65	92	60	38	35	44	17	35	37	111	46	33	28	6.06286e+07	Raph1	FALSE	FALSE	TRUE
chr1	74552455	74552678	223	45	81	57	113	34	89	73	64	54	245	67	96	56	182	63	74	7.45526e+07	Rqcd1	TRUE	FALSE	FALSE
chr1	153014481	153014704	223	82	63	61	59	60	36	50	58	202	19	57	44	49	36	55	54	1.53015e+08	C730036E19Rik	FALSE	FALSE	FALSE
chr1	189032489	189032712	223	55	30	27	115	125	66	21	33	52	8	33	77	93	46	30	28	1.89033e+08	Spata17	FALSE	FALSE	FALSE
chr1	189476524	189476747	223	29	22	28	30	14	33	33	25	13	103	21	29	28	76	22	20	1.89477e+08	Esrrg	TRUE	FALSE	FALSE
chr1	38233019	38233241	222	191	110	115	141	125	51	105	136	201	92	135	97	117	87	110	176	3.82331e+07	Rev1	FALSE	FALSE	FALSE
chr1	62771733	62771955	222	184	214	211	141	129	239	199	226	238	304	176	151	161	326	167	186	6.27719e+07	Nrp2	TRUE	FALSE	FALSE
chr1	75188729	75188951	222	22	57	62	24	24	59	67	80	55	155	52	26	33	128	51	50	7.51888e+07	Ankzf1	TRUE	FALSE	FALSE
chr1	133443618	133443840	222	143	51	74	318	188	88	59	95	88	70	90	233	195	164	110	99	1.33444e+08	Fam72a	FALSE	FALSE	TRUE
chr1	133585157	133585379	222	30	51	78	24	25	58	86	99	58	156	83	33	34	173	87	95	1.33585e+08	5430435G22Rik	TRUE	FALSE	FALSE
chr1	152971176	152971398	222	80	41	23	37	43	42	6	25	129	20	24	40	65	25	13	14	1.52971e+08	C730036E19Rik	FALSE	FALSE	TRUE
chr1	162303513	162303735	222	105	143	88	105	125	90	71	91	169	102	116	105	122	72	81	103	1.62304e+08	Rabgap1l	FALSE	FALSE	FALSE
chr1	58776960	58777181	221	61	176	59	35	23	26	47	60	45	180	88	73	33	27	47	58	5.87771e+07	Cflar	FALSE	FALSE	TRUE
chr1	88419071	88419292	221	110	107	159	63	72	207	205	178	74	336	152	44	70	346	170	188	8.84192e+07	Ptma	TRUE	FALSE	FALSE
chr1	90966025	90966246	221	16	50	25	26	10	24	26	30	33	104	36	39	24	35	30	20	9.09661e+07	Sh3bp4	FALSE	TRUE	FALSE
chr1	93338468	93338689	221	24	66	57	31	38	53	63	61	33	136	50	25	35	77	51	45	9.33386e+07	Per2	TRUE	FALSE	FALSE
chr1	107886234	107886455	221	92	81	83	93	64	90	96	93	133	108	75	73	63	156	76	87	1.07886e+08	Zcchc2	TRUE	FALSE	FALSE
chr1	65220352	65220572	220	42	22	22	128	95	70	24	24	63	22	31	106	125	43	26	23	6.52205e+07	Idh1	FALSE	FALSE	TRUE
chr1	67159958	67160178	220	64	47	23	81	84	51	13	32	106	20	33	108	98	48	30	19	6.71601e+07	Cps1	FALSE	FALSE	TRUE
chr1	138614465	138614685	220	132	82	86	113	70	91	71	67	138	60	68	72	76	130	61	67	1.38615e+08	Gm16880	FALSE	FALSE	FALSE
chr1	157883658	157883878	220	129	82	90	79	51	101	86	101	98	161	90	83	68	207	85	92	1.57884e+08	Tor1aip1	TRUE	FALSE	FALSE
chr1	41616167	41616386	219	51	66	77	22	52	63	106	75	55	135	70	32	83	88	84	66	4.16163e+07	4930448I06Rik	FALSE	TRUE	FALSE
chr1	84359486	84359705	219	125	59	28	75	122	65	13	22	122	18	47	117	141	45	17	21	8.43596e+07	Pid1	FALSE	FALSE	TRUE
chr1	88776203	88776422	219	188	171	105	288	241	154	86	104	311	95	140	197	228	141	89	128	8.87763e+07	Dis3l2	FALSE	FALSE	TRUE
chr1	100689974	100690193	219	84	53	25	63	116	66	25	20	88	18	36	80	90	34	26	21	1.0069e+08	Slco6d1	FALSE	FALSE	TRUE
chr1	123229126	123229345	219	136	348	97	151	123	93	45	75	188	316	162	179	195	111	54	97	1.23229e+08	Insig2	FALSE	FALSE	TRUE
chr1	135027598	135027817	219	126	185	216	435	167	283	270	247	146	563	228	358	176	651	238	214	1.35028e+08	Ppp1r15b	TRUE	FALSE	FALSE
chr1	164590464	164590683	219	111	68	71	144	128	68	69	81	95	65	70	121	120	74	52	78	1.64591e+08	7420461P10Rik	FALSE	FALSE	FALSE
chr1	193245333	193245552	219	150	147	91	208	140	70	65	101	163	167	94	159	134	107	85	89	1.93245e+08	Ppp2r5a	FALSE	FALSE	TRUE
chr1	135119398	135119616	218	25	96	80	38	26	110	97	76	41	163	81	51	37	147	89	78	1.35119e+08	Plekha6	TRUE	FALSE	FALSE
chr1	178943615	178943833	218	101	49	49	76	56	39	40	47	83	25	62	73	60	50	41	65	1.78944e+08	Sdccag8	FALSE	FALSE	TRUE
chr1	191809739	191809957	218	145	76	68	35	53	27	57	87	166	40	85	49	46	39	62	110	1.9181e+08	Smyd2	FALSE	FALSE	FALSE
chr1	75138893	75139110	217	53	46	61	51	38	48	65	83	22	125	51	58	49	84	51	59	7.5139e+07	1810031K17Rik	TRUE	FALSE	FALSE
chr1	81672271	81672488	217	49	42	36	110	109	99	37	45	50	26	51	114	134	94	50	52	8.16724e+07	9430031J16Rik	FALSE	FALSE	FALSE
chr1	133834349	133834566	217	114	184	110	184	186	57	124	99	107	248	161	132	125	114	110	135	1.33834e+08	Slc45a3	FALSE	TRUE	FALSE
chr1	133865665	133865882	217	44	80	82	63	56	90	73	101	65	283	85	67	61	201	80	78	1.33866e+08	Slc45a3	TRUE	FALSE	FALSE
chr1	180531321	180531538	217	62	149	279	156	68	200	315	333	42	404	211	108	93	495	190	221	1.80531e+08	Kif26b	TRUE	FALSE	FALSE
chr1	90115723	90115939	216	257	149	83	191	251	87	54	101	144	95	108	135	218	108	65	118	9.01158e+07	Ugt1a1	FALSE	FALSE	TRUE
chr1	129886939	129887155	216	73	137	122	103	34	101	129	115	95	334	106	91	57	123	63	89	129887090	Zranb3	FALSE	TRUE	FALSE
chr1	132980860	132981076	216	169	110	164	102	92	162	183	206	177	245	147	79	148	247	157	149	1.32981e+08	Mapkapk2	TRUE	FALSE	FALSE
chr1	152978496	152978712	216	51	84	27	18	10	11	24	25	46	151	36	29	12	15	22	28	1.52979e+08	C730036E19Rik	FALSE	TRUE	FALSE
chr1	158351211	158351427	216	55	72	61	56	49	91	73	51	88	130	65	64	61	155	55	57	158351335	Soat1	TRUE	FALSE	FALSE
chr1	9737678	9737893	215	37	44	43	16	26	31	44	51	31	141	38	30	28	110	30	41	9.73774e+06	1700034P13Rik	TRUE	FALSE	FALSE
chr1	90175695	90175909	214	689	400	189	298	337	154	57	120	896	106	231	322	371	167	89	94	9.01758e+07	Hjurp	FALSE	FALSE	TRUE
chr1	90184670	90184884	214	133	128	88	73	109	58	47	72	140	124	104	102	124	84	46	111	9.01848e+07	Hjurp	FALSE	FALSE	FALSE
chr1	91392907	91393121	214	58	85	70	50	84	64	64	99	56	105	86	59	79	83	62	105	9.1393e+07	Agap1	FALSE	TRUE	FALSE
chr1	121150136	121150350	214	75	66	72	96	128	88	54	93	46	38	66	116	150	58	52	89	1.2115e+08	Inhbb	FALSE	FALSE	FALSE
chr1	140407186	140407400	214	210	182	82	180	165	106	46	77	218	75	108	172	168	108	44	90	1.40407e+08	Nek7	FALSE	FALSE	TRUE
chr1	172798721	172798935	214	104	161	147	90	66	151	187	178	95	316	143	82	101	306	154	158	1.72799e+08	Atf6	TRUE	FALSE	FALSE
chr1	9611767	9611980	213	200	176	83	200	187	70	55	90	229	86	132	120	139	157	81	114	9.61184e+06	2610203C22Rik	FALSE	FALSE	TRUE
chr1	51569270	51569483	213	56	38	25	47	104	35	24	28	56	7	36	58	127	52	34	23	5.15694e+07	Obfc2a	FALSE	FALSE	FALSE
chr1	59493439	59493652	213	97	81	70	49	69	72	48	81	106	63	69	61	81	61	42	87	5.94935e+07	Fzd7	FALSE	FALSE	FALSE
chr1	159433210	159433423	213	167	111	59	111	126	67	29	53	145	26	64	135	149	54	30	36	1.59433e+08	Sec16b	FALSE	FALSE	FALSE
chr1	193101632	193101845	213	158	139	211	81	92	220	239	248	138	254	169	87	127	307	186	181	1.93102e+08	Nenf	TRUE	FALSE	FALSE
chr1	193617898	193618111	213	74	105	82	34	70	26	39	131	108	129	113	54	51	67	92	128	1.93618e+08	Nek2	FALSE	TRUE	FALSE
chr1	84275625	84275837	212	413	381	229	170	150	132	170	214	643	381	275	156	239	178	192	292	8.42757e+07	Pid1	FALSE	FALSE	FALSE
chr1	92961471	92961683	212	69	83	140	100	78	117	153	184	54	201	108	64	76	179	101	123	9.29616e+07	Lrrfip1	TRUE	FALSE	FALSE
chr1	95024829	95025041	212	34	66	73	52	60	113	89	91	66	159	85	83	106	216	72	120	9.50249e+07	Agxt	TRUE	FALSE	FALSE
chr1	169201976	169202188	212	41	93	78	96	59	53	89	71	45	118	81	65	52	109	69	72	1.69202e+08	Uck2	FALSE	TRUE	FALSE
chr1	184897495	184897707	212	43	17	17	62	121	48	9	22	67	7	27	73	114	40	19	26	1.84898e+08	Tlr5	FALSE	FALSE	FALSE
chr1	196447002	196447214	212	7	29	21	12	6	4	20	29	19	104	23	15	0	18	33	14	1.96447e+08	Plxna2	FALSE	TRUE	FALSE
chr1	71959230	71959441	211	295	223	107	163	198	127	55	82	317	98	131	207	215	103	78	93	71959323	Gm8883	FALSE	FALSE	TRUE
chr1	91610803	91611014	211	12	44	38	25	18	36	21	68	25	109	24	19	24	56	20	32	9.16109e+07	Agap1	TRUE	FALSE	FALSE
chr1	135609659	135609870	211	56	34	59	26	25	34	53	70	57	101	68	33	26	46	55	99	1.3561e+08	Atp2b4	FALSE	TRUE	FALSE
chr1	37357660	37357870	210	79	83	66	43	24	51	63	78	81	155	81	51	33	62	75	68	3.73578e+07	Inpp4a	FALSE	TRUE	FALSE
chr1	88367110	88367320	210	89	52	54	107	65	44	56	43	197	32	53	88	66	28	44	49	8.83672e+07	1700019O17Rik	FALSE	FALSE	TRUE
chr1	185924379	185924589	210	93	75	45	101	117	63	22	52	119	31	71	112	111	57	39	70	1.85924e+08	Dusp10	FALSE	FALSE	TRUE
chr1	24115017	24115226	209	59	58	46	132	151	82	45	47	89	18	59	122	180	62	49	72	2.41151e+07	Fam135a	FALSE	FALSE	FALSE
chr1	121929804	121930013	209	58	125	125	46	50	136	143	157	47	386	111	53	96	320	108	116	1.2193e+08	Sctr	TRUE	FALSE	FALSE
chr1	163199141	163199350	209	95	118	56	54	41	39	28	41	81	69	88	64	50	46	37	52	1.63199e+08	Prdx6	FALSE	FALSE	TRUE
chr1	60916746	60916954	208	111	185	80	124	106	58	63	79	140	150	135	131	125	85	87	130	6.09169e+07	Ctla4	FALSE	FALSE	TRUE
chr1	65137201	65137409	208	413	289	283	351	361	158	258	298	457	268	304	259	298	212	257	300	65137201	Crygb	FALSE	FALSE	FALSE
chr1	88375755	88375963	208	123	144	112	90	127	48	96	128	176	142	142	90	95	99	112	133	8.83759e+07	Ptma	FALSE	TRUE	FALSE
chr1	130723050	130723258	208	118	69	53	100	139	86	43	55	192	29	70	97	156	53	41	103	1.30723e+08	Cxcr4	FALSE	FALSE	TRUE
chr1	166185032	166185240	208	94	111	86	85	72	42	83	118	104	196	113	85	56	67	91	135	1.66185e+08	Slc19a2	FALSE	TRUE	FALSE
chr1	20059953	20060160	207	142	143	44	110	109	70	28	32	92	34	68	79	97	63	41	42	2.006e+07	Pkhd1	FALSE	FALSE	FALSE
chr1	39635374	39635581	207	92	174	56	119	155	83	25	45	135	129	92	170	139	82	27	72	3.96355e+07	Rnf149	FALSE	FALSE	TRUE
chr1	133174804	133175011	207	20	47	42	29	32	41	55	41	9	127	36	30	31	115	30	34	1.33175e+08	Ikbke	TRUE	FALSE	FALSE
chr1	65384423	65384629	206	100	76	35	42	31	19	29	16	103	34	56	22	28	16	25	33	6.53845e+07	Pth2r	FALSE	FALSE	TRUE
chr1	138842663	138842869	206	44	53	69	29	22	81	81	85	37	95	62	28	51	126	78	64	1.38843e+08	Nr5a2	TRUE	FALSE	FALSE
chr1	140503398	140503604	206	87	142	166	150	112	146	224	186	117	407	174	157	151	233	174	183	1.40503e+08	Nek7	FALSE	TRUE	FALSE
chr1	183811799	183812005	206	19	50	70	24	6	49	68	84	40	219	69	28	24	104	69	76	1.83812e+08	Lbr	FALSE	TRUE	FALSE
chr1	31072994	31073199	205	60	82	46	146	186	89	30	40	104	57	83	158	203	106	40	79	3.10731e+07	Ptp4a1	FALSE	FALSE	FALSE
chr1	94926067	94926272	205	233	205	166	181	322	133	130	197	214	118	154	146	325	118	114	143	9.49262e+07	Kif1a	FALSE	FALSE	TRUE
chr1	95039524	95039729	205	43	51	69	77	84	58	45	106	60	85	63	76	62	56	42	89	9.50396e+07	Agxt	FALSE	TRUE	FALSE
chr1	72257591	72257795	204	133	154	130	138	187	68	136	157	156	261	127	96	121	128	97	158	7.22577e+07	Mreg	FALSE	TRUE	FALSE
chr1	167436512	167436716	204	75	90	52	44	53	19	21	60	87	105	58	62	40	22	40	55	1.67437e+08	Adcy10	FALSE	TRUE	FALSE
chr1	23170544	23170747	203	75	24	15	57	133	57	13	13	93	7	22	72	126	34	20	9	2.31706e+07	4933415F23Rik	FALSE	FALSE	TRUE
chr1	45954982	45955185	203	35	15	44	138	129	79	38	68	47	9	39	100	128	67	31	47	4.59551e+07	Slc40a1	FALSE	FALSE	FALSE
chr1	9554176	9554378	202	80	82	49	86	108	75	36	49	149	30	61	116	184	90	46	40	9.55428e+06	Adhfe1	FALSE	FALSE	TRUE
chr1	92998402	92998604	202	130	134	88	100	117	105	86	108	165	60	117	99	124	101	86	99	9.29985e+07	Lrrfip1	FALSE	FALSE	TRUE
chr1	173163183	173163385	202	138	55	28	50	71	41	15	23	118	16	28	54	50	23	15	19	1.73163e+08	Fcer1g	FALSE	FALSE	TRUE
chr1	182781219	182781421	202	5	14	22	33	19	27	23	26	13	125	17	42	22	74	15	15	182781318	BC031781	TRUE	FALSE	FALSE
chr1	184343015	184343217	202	157	150	65	150	135	82	35	54	183	52	87	178	105	114	59	70	1.84343e+08	Trp53bp2	FALSE	FALSE	TRUE
chr1	91001021	91001222	201	89	107	145	266	95	181	213	155	122	256	160	155	120	336	183	188	9.10012e+07	Sh3bp4	TRUE	FALSE	FALSE
chr1	164916348	164916549	201	105	60	59	175	210	90	46	67	101	22	60	110	225	117	43	61	1.64916e+08	Fmo3	FALSE	FALSE	FALSE
chr1	82313524	82313724	200	32	56	46	43	26	18	47	53	80	140	57	41	23	76	55	66	8.23136e+07	Rhbdd1	FALSE	TRUE	FALSE
chr1	134215892	134216092	200	52	80	77	54	68	129	94	99	64	240	90	46	92	232	101	116	1.34216e+08	Nuak2	TRUE	FALSE	FALSE
chr1	159342684	159342884	200	48	139	84	106	42	129	81	113	69	436	91	106	55	280	85	105	1.59343e+08	Rasal2	TRUE	FALSE	FALSE
chr1	164770469	164770669	200	125	166	61	69	62	75	39	41	140	87	93	83	89	41	44	75	1.64771e+08	Fmo1	FALSE	FALSE	TRUE
chr1	195104679	195104879	200	249	139	153	122	128	123	134	157	224	111	146	119	103	95	146	140	1.95105e+08	G0s2	FALSE	FALSE	FALSE
chr1	120375960	120376159	199	26	134	102	99	63	52	107	105	18	170	162	112	57	112	159	98	1.20376e+08	Clasp1	FALSE	TRUE	FALSE
chr1	140993066	140993265	199	48	21	19	67	108	30	15	27	40	11	31	63	145	44	32	23	1.40993e+08	Dennd1b	FALSE	FALSE	FALSE
chr1	142312480	142312679	199	52	44	40	103	134	93	31	39	68	17	48	125	172	108	43	41	1.42313e+08	Kcnt2	FALSE	FALSE	FALSE
chr1	169548106	169548305	199	33	63	42	49	42	95	43	54	45	109	52	48	67	102	49	59	1.69548e+08	Rxrg	TRUE	FALSE	FALSE
chr1	172520122	172520321	199	25	42	19	30	15	13	16	23	28	116	33	21	27	56	26	36	1.7252e+08	Nos1ap	FALSE	TRUE	FALSE
chr1	177577165	177577364	199	52	57	56	33	38	22	39	86	82	106	64	36	35	55	56	68	1.77577e+08	Kmo	FALSE	TRUE	FALSE
chr1	193079901	193080100	199	43	31	48	29	37	65	40	75	33	77	38	23	42	102	43	36	1.9308e+08	Nenf	TRUE	FALSE	FALSE
chr1	193662892	193663091	199	15	67	38	16	20	30	35	48	26	108	54	21	27	28	43	57	1.93663e+08	Nek2	FALSE	TRUE	FALSE
chr1	36661396	36661594	198	59	131	80	64	48	66	67	98	134	156	93	64	31	63	81	95	3.66615e+07	Fam178b	FALSE	TRUE	FALSE
chr1	74849695	74849893	198	21	40	38	115	24	35	47	46	27	169	46	86	29	130	38	61	7.48498e+07	Wnt10a	TRUE	FALSE	FALSE
chr1	123230689	123230887	198	101	102	46	103	150	114	22	45	212	34	76	103	227	73	34	34	1.23231e+08	Insig2	FALSE	FALSE	TRUE
chr1	123245485	123245683	198	132	92	44	82	131	61	27	29	101	23	67	83	108	39	35	39	1.23246e+08	Insig2	FALSE	FALSE	TRUE
chr1	133907280	133907478	198	58	117	32	47	49	21	8	17	64	18	40	43	44	14	12	9	1.33907e+08	Elk4	FALSE	FALSE	TRUE
chr1	140929068	140929266	198	50	57	31	103	90	46	27	40	40	64	56	132	120	64	38	55	1.40929e+08	Dennd1b	FALSE	FALSE	FALSE
chr1	156922081	156922279	198	212	346	438	453	380	391	524	499	200	648	406	386	444	668	413	441	1.56922e+08	Ier5	TRUE	FALSE	FALSE
chr1	158587775	158587973	198	350	482	517	341	303	686	579	646	380	1208	538	336	499	1269	511	571	1.58588e+08	Tor3a	TRUE	FALSE	FALSE
chr1	181516958	181517156	198	79	117	84	41	40	85	65	108	101	342	88	49	52	162	74	73	1.81517e+08	Cnst	TRUE	FALSE	FALSE
chr1	13302679	13302876	197	81	74	56	37	36	52	41	87	71	134	70	46	38	68	39	90	13302781	Ncoa2	FALSE	TRUE	FALSE
chr1	73677043	73677240	197	156	136	139	98	167	87	154	161	197	229	158	98	160	83	159	185	7.36771e+07	6030407O03Rik	FALSE	TRUE	FALSE
chr1	75534234	75534431	197	53	45	47	48	28	33	47	48	54	103	56	41	43	46	44	59	7.55343e+07	Stk11ip	FALSE	TRUE	FALSE
chr1	89190922	89191119	197	61	19	29	75	112	77	29	28	51	9	27	57	98	27	23	23	8.91911e+07	Efhd1	FALSE	FALSE	FALSE
chr1	157642970	157643167	197	200	230	305	248	259	106	338	345	240	312	300	185	239	179	300	309	1.57643e+08	Qsox1	FALSE	FALSE	FALSE
chr1	108164727	108164923	196	316	275	141	87	113	92	108	123	301	195	207	106	105	67	126	198	1.08165e+08	Phlpp1	FALSE	FALSE	FALSE
chr1	121198969	121199165	196	34	61	72	58	24	69	55	76	106	87	60	29	48	87	52	64	1.21199e+08	Inhbb	FALSE	TRUE	FALSE
chr1	137813869	137814065	196	46	49	61	18	15	52	66	75	33	126	56	20	17	122	56	55	1.37814e+08	Pkp1	TRUE	FALSE	FALSE
chr1	169287530	169287726	196	78	93	120	102	87	81	133	127	61	186	110	95	90	86	135	101	1.69288e+08	Aldh9a1	FALSE	TRUE	FALSE
chr1	193149619	193149815	196	15	39	29	47	25	47	24	41	15	125	36	41	31	111	33	40	1.9315e+08	Tmem206	TRUE	FALSE	FALSE
chr1	37404216	37404411	195	123	426	118	142	118	56	81	89	130	263	185	158	109	106	86	141	3.74043e+07	Inpp4a	FALSE	TRUE	FALSE
chr1	75367997	75368192	195	21	44	22	9	10	8	26	28	26	127	35	15	20	58	31	31	7.53681e+07	Gm15179	FALSE	TRUE	FALSE
chr1	84191524	84191719	195	28	32	22	29	27	32	21	26	104	13	25	30	34	18	15	21	8.41916e+07	Pid1	FALSE	FALSE	TRUE
chr1	90602418	90602613	195	40	140	86	50	30	127	89	104	73	468	110	46	71	226	102	87	9.06025e+07	Arl4c	TRUE	FALSE	FALSE
chr1	134440432	134440627	195	24	60	62	16	12	84	55	77	22	168	72	32	27	138	63	79	1.34441e+08	Cntn2	TRUE	FALSE	FALSE
chr1	138438372	138438567	195	307	245	217	308	274	181	201	237	265	256	253	248	257	206	200	247	1.38438e+08	Kif14	FALSE	FALSE	TRUE
chr1	154366101	154366296	195	34	36	47	15	16	51	39	55	15	107	51	23	36	98	42	38	1.54366e+08	Rgl1	TRUE	FALSE	FALSE
chr1	185877125	185877320	195	234	121	129	275	333	189	96	148	285	66	159	266	319	168	162	162	1.85877e+08	Dusp10	FALSE	FALSE	TRUE
chr1	188573163	188573358	195	12	39	92	51	31	90	164	69	9	140	88	38	55	173	122	49	1.88573e+08	Rrp15	TRUE	FALSE	FALSE
chr1	193456685	193456880	195	252	409	334	227	178	195	307	400	265	718	284	207	199	258	229	293	1.93457e+08	Ints7	FALSE	TRUE	FALSE
chr1	52806907	52807101	194	125	133	132	81	77	29	128	157	123	173	145	57	89	87	131	147	52807032	Mfsd6	FALSE	TRUE	FALSE
chr1	82290800	82290994	194	150	68	34	92	188	75	23	30	197	6	44	98	178	40	25	20	8.22909e+07	Irs1	FALSE	FALSE	TRUE
chr1	90166440	90166634	194	141	149	171	137	219	147	127	217	183	146	176	118	174	169	155	193	9.01666e+07	6430706D22Rik	FALSE	FALSE	FALSE
chr1	93317150	93317344	194	154	156	133	94	114	83	144	152	186	142	128	71	112	89	135	129	9.33172e+07	Per2	FALSE	FALSE	FALSE
chr1	155549807	155550001	194	86	115	81	153	87	56	29	136	117	159	100	125	89	78	47	142	1.5555e+08	Rgs16	FALSE	TRUE	FALSE
chr1	37113765	37113958	193	60	100	66	41	37	44	41	81	57	176	71	52	42	51	38	76	3.71139e+07	Tmem131	FALSE	TRUE	FALSE
chr1	62753256	62753449	193	21	79	24	53	4	34	31	18	25	316	36	64	16	82	26	21	6.27534e+07	Nrp2	FALSE	TRUE	FALSE
chr1	145794162	145794355	193	279	204	171	212	176	105	96	152	323	178	172	221	187	145	105	164	145794210	Rgs2	FALSE	FALSE	TRUE
chr1	163188237	163188430	193	106	20	36	138	178	80	34	28	111	12	37	117	145	54	30	22	1.63188e+08	Prdx6	FALSE	FALSE	TRUE
chr1	168245944	168246137	193	79	141	76	127	93	43	62	69	136	134	110	134	107	61	67	112	1.68246e+08	Ildr2	FALSE	FALSE	TRUE
chr1	168309070	168309263	193	42	58	32	59	34	44	35	32	33	161	40	42	33	100	43	38	1.68309e+08	Tada1	TRUE	FALSE	FALSE
chr1	182125206	182125399	193	74	78	102	47	37	85	139	105	103	174	91	38	70	134	98	92	1.82125e+08	Adck3	FALSE	TRUE	FALSE
chr1	45488930	45489122	192	94	101	41	116	50	44	21	35	81	75	63	115	73	40	12	30	4.5489e+07	Col5a2	FALSE	FALSE	TRUE
chr1	51704949	51705141	192	53	119	41	88	56	35	25	30	48	94	78	114	44	46	31	61	5.1705e+07	Obfc2a	FALSE	FALSE	TRUE
chr1	90457508	90457700	192	21	61	54	56	33	41	71	51	54	113	61	42	22	30	61	51	9.04576e+07	Gm19589	FALSE	TRUE	FALSE
chr1	163968078	163968270	192	69	68	72	40	36	39	57	92	77	118	55	22	24	31	49	49	1.63968e+08	Dnm3	FALSE	TRUE	FALSE
chr1	167701569	167701761	192	140	122	85	105	81	89	67	85	148	77	80	84	97	102	55	70	1.67702e+08	Creg1	FALSE	FALSE	FALSE
chr1	172465556	172465748	192	152	198	205	256	224	131	235	243	191	374	221	185	201	193	226	250	1.72466e+08	Nos1ap	FALSE	TRUE	FALSE
chr1	186633352	186633544	192	134	75	52	80	181	95	42	55	101	20	64	95	166	60	39	42	1.86633e+08	Mosc1	FALSE	FALSE	TRUE
chr1	140808947	140809138	191	243	257	143	316	183	133	127	130	271	253	191	286	180	168	140	208	1.40809e+08	Dennd1b	FALSE	FALSE	TRUE
chr1	156098419	156098610	191	62	39	29	106	119	66	23	34	97	9	43	119	99	40	18	36	1.56099e+08	4930452N14Rik	FALSE	FALSE	TRUE
chr1	172434127	172434318	191	48	66	51	23	42	31	43	65	35	107	52	32	59	39	34	61	1.72434e+08	Nos1ap	FALSE	TRUE	FALSE
chr1	180571364	180571555	191	58	97	124	26	34	80	136	147	27	310	117	29	41	84	137	90	1.80571e+08	Kif26b	FALSE	TRUE	FALSE
chr1	187280358	187280549	191	318	242	161	305	225	107	108	195	358	201	191	225	192	149	138	208	1.8728e+08	Gm2061	FALSE	FALSE	TRUE
chr1	36931675	36931865	190	132	119	165	89	95	63	148	185	141	229	126	64	75	75	98	139	3.69319e+07	Tmem131	FALSE	TRUE	FALSE
chr1	55187738	55187928	190	86	66	78	59	52	89	83	85	110	111	62	56	70	97	57	65	5.51878e+07	Mob4	FALSE	TRUE	FALSE
chr1	75214601	75214791	190	59	80	64	46	42	33	65	77	35	261	74	45	39	85	83	68	7.52147e+07	Tuba4a	FALSE	TRUE	FALSE
chr1	89694968	89695158	190	267	296	158	118	137	71	98	222	310	184	203	139	156	93	134	203	8.96951e+07	Sag	FALSE	FALSE	TRUE
chr1	121962782	121962972	190	108	58	61	124	86	51	69	57	115	31	53	85	62	49	45	60	1.21963e+08	Tmem37	FALSE	FALSE	TRUE
chr1	159219476	159219666	190	131	115	45	76	46	31	25	31	123	40	52	46	40	23	16	11	1.5922e+08	Rasal2	FALSE	FALSE	TRUE
chr1	172627257	172627447	190	29	57	45	20	21	45	31	59	51	127	54	23	39	39	32	65	1.72627e+08	Olfml2b	FALSE	TRUE	FALSE
chr1	31107232	31107421	189	56	130	76	54	40	43	64	94	105	351	83	42	58	59	77	102	3.11073e+07	Ptp4a1	FALSE	TRUE	FALSE
chr1	31150849	31151038	189	102	33	47	137	171	85	43	58	171	19	52	112	139	76	53	47	3.1151e+07	Lgsn	FALSE	FALSE	TRUE
chr1	62778741	62778930	189	102	100	151	60	61	220	185	163	88	258	126	41	87	247	166	122	6.27788e+07	Nrp2	TRUE	FALSE	FALSE
chr1	93353115	93353304	189	82	110	87	40	54	112	73	95	87	135	94	59	63	77	75	95	9.33532e+07	Per2	TRUE	FALSE	FALSE
chr1	121191812	121192001	189	22	70	41	13	11	68	36	58	24	161	45	14	20	105	34	51	1.21192e+08	Inhbb	TRUE	FALSE	FALSE
chr1	158943208	158943397	189	140	86	63	56	102	59	48	52	170	36	79	75	141	43	47	63	1.58943e+08	Ralgps2	FALSE	FALSE	TRUE
chr1	163197096	163197285	189	109	103	47	83	111	43	40	43	182	46	81	65	91	58	51	76	1.63197e+08	Prdx6	FALSE	FALSE	TRUE
chr1	182874885	182875074	189	7	36	14	16	16	12	16	15	0	108	30	43	13	20	21	26	1.82875e+08	Tmem63a	FALSE	TRUE	FALSE
chr1	191930678	191930867	189	208	122	83	193	168	86	78	77	213	58	107	181	131	108	77	80	1.91931e+08	Prox1	FALSE	FALSE	TRUE
chr1	195136759	195136948	189	113	97	51	83	146	58	33	53	92	57	71	139	147	57	31	59	1.95137e+08	Lamb3	FALSE	FALSE	TRUE
chr1	84429994	84430182	188	102	102	75	107	89	23	51	94	160	120	95	83	50	58	70	102	8.44301e+07	Dner	FALSE	FALSE	FALSE
chr1	90156710	90156898	188	80	75	129	26	34	153	146	157	86	252	126	47	102	359	137	140	90156806	Hjurp	TRUE	FALSE	FALSE
chr1	90174031	90174219	188	562	595	756	1443	582	985	922	878	581	1573	740	1083	744	2276	841	793	9.01741e+07	Hjurp	TRUE	FALSE	FALSE
chr1	133693694	133693882	188	110	57	35	26	37	17	25	36	64	42	51	21	38	24	35	54	1.33694e+08	Pm20d1	FALSE	FALSE	FALSE
chr1	173383180	173383368	188	334	347	280	151	147	119	253	269	368	281	274	172	188	110	211	280	1.73383e+08	F11r	FALSE	FALSE	FALSE
chr1	181491298	181491486	188	222	126	80	208	237	133	37	76	231	34	90	234	217	107	51	91	1.81491e+08	Cnst	FALSE	FALSE	TRUE
chr1	21305969	21306156	187	72	39	23	66	80	30	7	24	111	21	28	77	107	37	18	30	2.13061e+07	Gm4956	FALSE	FALSE	TRUE
chr1	51797800	51797987	187	167	75	52	154	142	82	35	61	142	30	75	115	131	90	73	81	5.17979e+07	Myo1b	FALSE	FALSE	TRUE
chr1	88609764	88609951	187	59	43	25	29	48	28	13	31	107	15	38	36	61	41	18	34	8.86099e+07	Dis3l2	FALSE	FALSE	TRUE
chr1	99499595	99499782	187	4	2	12	42	118	68	11	22	1	8	16	42	89	33	14	28	9.94997e+07	D1Ertd622e	FALSE	FALSE	FALSE
chr1	13231498	13231684	186	37	65	57	46	69	43	63	74	20	130	59	52	39	64	48	84	1.32316e+07	Ncoa2	FALSE	TRUE	FALSE
chr1	138856090	138856276	186	40	10	37	102	132	61	25	69	54	12	34	111	135	57	28	62	1.38856e+08	Nr5a2	FALSE	FALSE	FALSE
chr1	139068767	139068953	186	56	28	19	37	71	35	11	16	115	7	28	30	80	23	20	20	1.39069e+08	Nr5a2	FALSE	FALSE	TRUE
chr1	155792460	155792646	186	115	80	150	137	97	149	194	151	103	152	133	83	91	231	162	133	1.55793e+08	Glul	TRUE	FALSE	FALSE
chr1	158588906	158589092	186	222	214	234	145	151	212	237	285	266	280	245	161	190	359	242	231	1.58589e+08	Tor3a	TRUE	FALSE	FALSE
chr1	182688233	182688419	186	70	114	104	43	63	85	97	149	69	193	102	63	95	166	78	125	1.82688e+08	Acbd3	TRUE	FALSE	FALSE
chr1	193246684	193246870	186	127	68	65	67	36	12	31	67	111	176	54	55	32	30	34	54	1.93247e+08	Ppp2r5a	FALSE	TRUE	FALSE
chr1	37407930	37408115	185	42	66	69	37	40	29	89	70	30	120	74	38	28	38	79	76	3.7408e+07	Inpp4a	FALSE	TRUE	FALSE
chr1	72334549	72334734	185	114	87	65	92	57	41	50	72	148	104	75	90	73	63	57	80	7.23347e+07	Tmem169	FALSE	FALSE	FALSE
chr1	75535316	75535501	185	78	102	53	36	32	32	35	42	109	55	58	37	51	27	31	40	7.55355e+07	Slc4a3	FALSE	FALSE	TRUE
chr1	89910854	89911039	185	139	100	78	316	247	90	47	81	119	55	86	215	200	114	76	59	8.99109e+07	Usp40	FALSE	FALSE	TRUE
chr1	195137880	195138065	185	233	284	314	175	147	235	340	385	266	462	292	144	131	339	259	308	1.95138e+08	Lamb3	TRUE	FALSE	FALSE
chr1	51777050	51777234	184	92	80	101	90	64	73	146	88	133	140	74	63	62	62	77	75	5.17771e+07	Myo1b	FALSE	TRUE	FALSE
chr1	65224776	65224960	184	165	151	173	97	81	204	198	193	203	257	135	102	140	208	143	152	6.52248e+07	Idh1	FALSE	TRUE	FALSE
chr1	75656998	75657182	184	205	136	140	143	150	78	146	134	224	113	146	113	140	88	121	146	75657096	Slc4a3	FALSE	FALSE	FALSE
chr1	93241656	93241840	184	13	56	28	89	14	29	35	28	6	158	44	61	18	76	48	30	9.32417e+07	Espnl	FALSE	TRUE	FALSE
chr1	93720338	93720522	184	64	85	82	71	60	50	75	110	124	90	97	71	62	58	94	100	9.37204e+07	Twist2	FALSE	FALSE	FALSE
chr1	133723184	133723368	184	84	48	43	122	111	63	31	47	123	25	58	66	90	56	50	63	1.33723e+08	Slc41a1	FALSE	FALSE	TRUE
chr1	158388867	158389051	184	141	101	39	48	56	22	13	21	163	11	57	63	62	32	33	28	1.58389e+08	Soat1	FALSE	FALSE	TRUE
chr1	162304722	162304906	184	100	38	29	135	192	129	37	40	105	10	44	118	254	81	43	23	1.62305e+08	Rabgap1l	FALSE	FALSE	FALSE
chr1	171899496	171899680	184	124	144	154	199	120	198	188	175	130	313	180	190	160	421	220	182	1.719e+08	3110045C21Rik	TRUE	FALSE	FALSE
chr1	176861228	176861412	184	72	54	43	13	30	18	41	44	110	24	45	12	27	16	28	41	1.76861e+08	Grem2	FALSE	FALSE	FALSE
chr1	177532480	177532664	184	81	126	123	53	66	63	138	152	67	365	102	60	95	159	83	131	1.77533e+08	Fh1	FALSE	TRUE	FALSE
chr1	195116292	195116476	184	151	154	79	103	123	83	59	101	135	90	91	100	136	91	53	94	1.95116e+08	Lamb3	FALSE	FALSE	FALSE
chr1	58158461	58158644	183	168	62	62	235	238	108	64	70	236	28	89	194	231	115	85	101	5.81586e+07	Aox1	FALSE	FALSE	TRUE
chr1	75071556	75071739	183	60	73	75	56	63	50	93	82	59	235	77	42	56	90	75	82	7.50716e+07	Nhej1	FALSE	TRUE	FALSE
chr1	84296441	84296624	183	78	95	42	152	157	88	23	41	68	60	67	112	157	82	36	43	8.42965e+07	Pid1	FALSE	FALSE	FALSE
chr1	133173525	133173708	183	100	111	132	96	52	114	149	147	80	241	140	68	68	170	143	166	1.33174e+08	Ikbke	FALSE	TRUE	FALSE
chr1	137179176	137179359	183	101	73	58	94	103	66	41	48	132	83	80	124	118	73	57	97	1.37179e+08	Rnpep	FALSE	FALSE	TRUE
chr1	138434984	138435167	183	235	231	211	174	192	208	189	227	213	236	220	190	188	179	195	231	1.38435e+08	Kif14	FALSE	TRUE	FALSE
chr1	152313313	152313496	183	76	39	22	53	109	52	15	21	75	11	35	88	134	35	14	23	1.52313e+08	Prg4	FALSE	FALSE	TRUE
chr1	154291827	154292010	183	86	130	57	116	153	76	47	52	128	36	96	110	141	96	43	45	1.54292e+08	Glt25d2	FALSE	FALSE	TRUE
chr1	169177221	169177404	183	325	326	357	133	168	151	373	409	423	574	365	133	221	145	425	345	1.69177e+08	Uck2	FALSE	TRUE	FALSE
chr1	172518324	172518507	183	97	161	69	166	103	92	55	70	162	112	103	116	120	80	62	98	1.72518e+08	Nos1ap	FALSE	FALSE	TRUE
chr1	184201785	184201968	183	105	151	151	138	70	114	164	192	63	381	160	132	69	205	160	173	1.84202e+08	Degs1	TRUE	FALSE	FALSE
chr1	54883552	54883734	182	104	126	154	67	97	81	168	167	152	367	152	73	76	110	137	150	5.48836e+07	Ankrd44	FALSE	TRUE	FALSE
chr1	91412451	91412633	182	218	181	126	162	111	97	118	140	337	143	154	114	95	121	102	135	9.14126e+07	Agap1	FALSE	FALSE	FALSE
chr1	136351983	136352165	182	113	120	135	381	84	165	176	152	91	349	119	206	79	274	146	116	1.36352e+08	Klhl12	TRUE	FALSE	FALSE
chr1	138907217	138907399	182	138	140	90	156	213	90	50	87	102	56	92	116	194	99	69	80	1.38907e+08	Nr5a2	FALSE	FALSE	TRUE
chr1	170266579	170266761	182	45	30	29	58	109	42	16	21	107	14	29	82	103	38	15	12	1.70267e+08	Pbx1	FALSE	FALSE	TRUE
chr1	172553213	172553395	182	76	142	65	97	36	24	43	48	67	154	89	83	48	44	59	88	1.72553e+08	Olfml2b	FALSE	TRUE	FALSE
chr1	34496139	34496320	181	8	26	30	92	27	39	41	30	25	141	37	66	37	112	32	34	34496201	Ccdc115	TRUE	FALSE	FALSE
chr1	40236497	40236678	181	112	137	83	127	71	70	57	92	128	165	91	110	62	85	59	99	4.02366e+07	Il1r1	FALSE	TRUE	FALSE
chr1	41608636	41608817	181	50	92	33	54	124	64	29	20	54	25	42	67	149	60	32	11	4.16087e+07	4930448I06Rik	FALSE	FALSE	TRUE
chr1	55632805	55632986	181	1	71	25	20	5	2	7	11	6	109	32	30	8	8	14	12	5.56329e+07	Plcl1	FALSE	FALSE	TRUE
chr1	58135312	58135493	181	134	85	41	136	102	61	44	37	124	35	68	108	109	75	55	38	5.81354e+07	Aox1	FALSE	FALSE	TRUE
chr1	60698440	60698621	181	92	51	33	60	110	49	31	38	106	17	43	64	118	68	38	38	6.06985e+07	Raph1	FALSE	FALSE	TRUE
chr1	90180859	90181040	181	237	246	217	214	114	63	197	259	180	302	223	182	135	125	179	235	9.01809e+07	Hjurp	FALSE	TRUE	FALSE
chr1	167050612	167050793	181	29	43	51	48	16	75	58	63	50	208	56	42	37	142	61	63	1.67051e+08	4930568G15Rik	TRUE	FALSE	FALSE
chr1	186661703	186661884	181	128	80	73	78	143	86	69	72	126	90	100	104	122	54	70	112	1.86662e+08	Mosc2	FALSE	FALSE	TRUE
chr1	89797698	89797878	180	162	171	167	201	132	89	166	188	203	331	169	132	120	133	152	179	8.97978e+07	Dgkd	FALSE	TRUE	FALSE
chr1	90155849	90156029	180	178	174	213	91	107	185	220	291	273	438	184	129	100	219	179	225	9.01559e+07	Hjurp	TRUE	FALSE	FALSE
chr1	97210007	97210187	180	29	43	35	36	28	26	38	45	24	108	39	44	24	109	39	32	9.72101e+07	Fam174a	TRUE	FALSE	FALSE
chr1	157005611	157005791	180	33	32	34	163	35	48	53	22	42	78	42	97	41	79	51	23	1.57006e+08	Stx6	TRUE	FALSE	FALSE
chr1	95057434	95057613	179	100	98	136	65	54	185	172	165	100	264	130	49	104	357	154	143	9.50575e+07	2310007B03Rik	TRUE	FALSE	FALSE
chr1	95532288	95532467	179	204	257	333	580	247	349	474	335	144	670	281	362	228	650	302	299	9.55324e+07	Stk25	TRUE	FALSE	FALSE
chr1	121197018	121197197	179	77	149	81	90	103	41	55	76	106	163	114	103	86	46	78	94	1.21197e+08	Inhbb	FALSE	TRUE	FALSE
chr1	127457322	127457501	179	17	56	29	56	18	19	31	38	23	166	44	64	44	122	39	39	1.27457e+08	Slc35f5	TRUE	FALSE	FALSE
chr1	134416407	134416586	179	188	123	97	62	94	32	79	108	210	154	142	77	111	67	96	170	1.34416e+08	Cntn2	FALSE	FALSE	FALSE
chr1	177538166	177538345	179	140	166	152	180	114	110	116	170	190	222	172	177	102	166	167	178	1.77538e+08	Fh1	FALSE	TRUE	FALSE
chr1	9937757	9937935	178	128	174	133	340	179	178	92	128	215	139	148	258	148	190	123	150	9.93783e+06	Snhg6	FALSE	FALSE	TRUE
chr1	34309188	34309366	178	8	27	28	9	9	26	26	32	15	103	29	12	27	62	30	38	3.43093e+07	Dst	FALSE	TRUE	FALSE
chr1	39533292	39533470	178	88	82	133	116	103	59	152	155	128	125	122	75	72	77	156	115	3.95334e+07	Tbc1d8	FALSE	FALSE	FALSE
chr1	90121092	90121270	178	134	86	63	100	101	73	45	78	258	47	66	75	128	43	42	99	90121134	Heatr7b1	FALSE	FALSE	TRUE
chr1	95122828	95123006	178	63	76	64	28	37	45	52	95	44	130	81	27	33	58	64	106	9.51229e+07	Sned1	FALSE	TRUE	FALSE
chr1	122016680	122016858	178	121	128	119	55	61	50	137	124	119	191	139	47	58	78	132	136	1.22017e+08	Dbi	FALSE	TRUE	FALSE
chr1	133083749	133083927	178	76	279	128	118	54	54	72	107	66	633	195	144	55	91	76	118	1.33084e+08	Rassf5	FALSE	TRUE	FALSE
chr1	195068539	195068717	178	180	166	254	143	108	240	305	294	208	362	209	117	131	336	189	253	1.95069e+08	Hsd11b1	TRUE	FALSE	FALSE
chr1	24114295	24114472	177	37	105	112	63	57	119	156	114	33	253	114	51	74	143	139	93	2.41144e+07	Fam135a	FALSE	TRUE	FALSE
chr1	42907936	42908113	177	18	51	35	39	15	37	35	42	32	128	41	48	40	124	31	39	4.2908e+07	Mrps9	TRUE	FALSE	FALSE
chr1	82180789	82180966	177	419	197	136	246	375	139	104	96	393	74	141	158	294	86	63	116	8.21809e+07	Irs1	FALSE	FALSE	TRUE
chr1	91350702	91350879	177	52	23	52	28	12	97	75	47	45	39	46	24	27	106	56	45	9.13508e+07	Agap1	TRUE	FALSE	FALSE
chr1	93334276	93334453	177	72	161	81	92	85	45	73	75	99	137	137	128	75	66	78	96	9.33343e+07	Per2	FALSE	TRUE	FALSE
chr1	107822400	107822577	177	88	81	110	40	55	44	109	148	125	154	94	37	62	44	109	93	1.07823e+08	Zcchc2	FALSE	TRUE	FALSE
chr1	109838621	109838798	177	87	84	56	86	91	64	33	78	114	101	65	59	107	93	41	78	1.09839e+08	Serpinb8	FALSE	FALSE	TRUE
chr1	155996177	155996354	177	90	188	121	91	52	64	87	147	157	280	119	74	59	103	87	102	1.55996e+08	Zfp648	FALSE	TRUE	FALSE
chr1	163178470	163178647	177	84	68	80	27	28	22	92	98	63	134	77	23	14	36	81	85	1.63179e+08	Prdx6	FALSE	TRUE	FALSE
chr1	193511517	193511694	177	83	421	147	157	98	71	60	121	72	353	208	161	94	120	98	170	1.93512e+08	Lpgat1	FALSE	TRUE	FALSE
chr1	39634342	39634518	176	259	344	359	649	152	376	449	391	275	948	337	402	181	782	331	387	3.96344e+07	Rnf149	TRUE	FALSE	FALSE
chr1	51562623	51562799	176	59	56	49	115	127	53	33	42	126	35	52	93	122	56	32	41	5.15627e+07	Obfc2a	FALSE	FALSE	TRUE
chr1	58170959	58171135	176	231	209	192	190	243	101	197	234	210	238	172	129	199	114	180	195	5.81711e+07	Aox3	FALSE	FALSE	FALSE
chr1	74447059	74447235	176	72	27	52	125	156	88	43	74	63	8	54	74	150	89	52	87	7.44472e+07	Mir26b	FALSE	FALSE	FALSE
chr1	120325016	120325192	176	101	113	77	225	165	69	84	73	51	76	103	150	135	97	107	71	1.20325e+08	Clasp1	FALSE	FALSE	TRUE
chr1	121043320	121043496	176	94	119	132	89	69	78	90	182	181	190	140	89	101	153	104	182	1.21043e+08	Gli2	FALSE	TRUE	FALSE
chr1	164794472	164794648	176	74	21	38	99	152	106	29	57	119	15	29	95	156	48	19	26	1.64795e+08	Fmo1	FALSE	FALSE	TRUE
chr1	168223347	168223523	176	69	78	46	93	112	61	27	44	86	36	60	112	142	56	44	36	1.68223e+08	Ildr2	FALSE	FALSE	TRUE
chr1	190499388	190499564	176	89	63	76	44	73	90	69	84	87	68	66	50	100	149	72	77	1.90499e+08	Ush2a	TRUE	FALSE	FALSE
chr1	108176946	108177121	175	132	97	66	94	78	46	48	74	149	79	95	123	64	78	72	105	1.08177e+08	Phlpp1	FALSE	FALSE	TRUE
chr1	135783075	135783250	175	39	61	183	38	22	225	212	211	36	205	141	36	82	413	162	173	1.35783e+08	Optc	TRUE	FALSE	FALSE
chr1	166191800	166191975	175	52	106	64	159	134	74	48	30	64	83	86	148	139	72	63	43	1.66192e+08	Slc19a2	FALSE	FALSE	FALSE
chr1	194596836	194597011	175	11	24	18	57	8	13	18	25	16	118	18	31	7	56	18	19	1.94597e+08	Hhat	FALSE	TRUE	FALSE
chr1	74116137	74116311	174	60	117	85	71	56	115	97	108	51	367	89	68	65	307	79	81	7.41162e+07	Tns1	TRUE	FALSE	FALSE
chr1	102446253	102446427	174	100	52	32	37	69	43	29	24	133	7	38	42	72	30	26	28	1.02446e+08	Gm20268	FALSE	FALSE	TRUE
chr1	154751717	154751891	174	145	222	220	45	64	254	207	285	144	792	187	60	113	427	195	156	154751831	Smg7	TRUE	FALSE	FALSE
chr1	155508793	155508967	174	99	96	100	69	47	75	121	107	120	208	81	69	40	158	84	75	1.55509e+08	Rgs8	FALSE	TRUE	FALSE
chr1	166178600	166178774	174	54	75	65	29	20	90	57	87	53	136	71	34	39	71	51	72	1.66179e+08	Slc19a2	TRUE	FALSE	FALSE
chr1	194979159	194979333	174	19	31	49	107	44	52	71	38	27	109	40	104	39	166	34	38	1.94979e+08	Irf6	TRUE	FALSE	FALSE
chr1	15987285	15987458	173	68	41	72	60	53	56	59	110	104	92	89	63	65	63	75	114	1.59874e+07	4930444P10Rik	FALSE	FALSE	FALSE
chr1	54609577	54609750	173	19	2	27	88	225	89	31	41	11	9	34	81	224	49	47	21	5.46096e+07	Pgap1	FALSE	FALSE	FALSE
chr1	75535505	75535678	173	110	140	62	63	73	82	29	37	143	41	78	59	100	56	35	42	7.55356e+07	Slc4a3	FALSE	FALSE	FALSE
chr1	134214069	134214242	173	175	115	109	58	107	75	89	116	217	82	122	65	77	63	106	131	134214163	Nuak2	FALSE	FALSE	FALSE
chr1	142303322	142303495	173	52	40	11	28	61	40	13	11	104	5	28	38	73	26	15	11	1.42303e+08	Kcnt2	FALSE	FALSE	TRUE
chr1	153795355	153795528	173	41	43	53	18	21	31	50	84	15	118	60	24	22	37	60	78	1.53795e+08	1700025G04Rik	FALSE	TRUE	FALSE
chr1	188506532	188506705	173	165	121	69	111	130	80	47	46	217	59	81	92	124	53	52	71	1.88507e+08	Tgfb2	FALSE	FALSE	TRUE
chr1	71985283	71985455	172	219	163	85	137	149	60	46	58	231	46	91	119	152	76	49	52	7.19854e+07	Gm8883	FALSE	FALSE	TRUE
chr1	93336493	93336665	172	91	128	195	108	90	180	211	248	126	262	172	92	113	351	161	208	9.33366e+07	Per2	TRUE	FALSE	FALSE
chr1	121190533	121190705	172	292	230	420	237	201	261	529	495	289	453	304	181	201	368	364	317	1.21191e+08	Inhbb	FALSE	TRUE	FALSE
chr1	142161388	142161560	172	110	93	65	183	107	63	34	61	127	80	68	161	97	78	54	47	1.42161e+08	Kcnt2	FALSE	FALSE	TRUE
chr1	152344927	152345099	172	25	17	26	118	127	57	30	20	42	4	25	114	111	31	25	17	1.52345e+08	Prg4	FALSE	FALSE	FALSE
chr1	159524859	159525031	172	67	39	22	49	104	28	23	18	50	7	32	27	89	21	21	14	1.59525e+08	Sec16b	FALSE	FALSE	TRUE
chr1	170173287	170173459	172	185	156	171	136	151	128	171	211	142	405	178	120	145	278	146	219	1.70173e+08	Pbx1	FALSE	TRUE	FALSE
chr1	188628427	188628599	172	65	47	16	54	73	33	15	17	76	7	31	55	106	22	14	7	1.88628e+08	Rrp15	FALSE	FALSE	TRUE
chr1	196308948	196309120	172	367	161	139	287	244	141	123	134	268	104	153	192	266	185	111	185	1.96309e+08	Plxna2	FALSE	FALSE	TRUE
chr1	36837745	36837916	171	20	44	42	11	17	66	43	54	24	135	43	13	17	129	34	51	3.68378e+07	Zap70	TRUE	FALSE	FALSE
chr1	52857295	52857466	171	82	65	49	65	85	46	41	55	56	23	64	94	101	41	44	48	52857342	Inpp1	FALSE	FALSE	TRUE
chr1	162009624	162009795	171	369	416	509	337	197	334	652	562	332	902	437	258	251	603	526	368	1.6201e+08	4930562F07Rik	FALSE	TRUE	FALSE
chr1	21316830	21317000	170	183	174	83	132	125	78	75	63	181	90	101	120	105	88	71	78	2.13169e+07	Khdc1a	FALSE	FALSE	TRUE
chr1	40232839	40233009	170	270	132	85	184	169	70	61	69	257	54	100	156	167	90	56	74	4.02329e+07	Il1r1	FALSE	FALSE	TRUE
chr1	62221985	62222155	170	95	171	67	117	97	66	21	47	87	136	93	119	88	77	39	45	6.2222e+07	Pard3b	FALSE	FALSE	TRUE
chr1	62798317	62798487	170	203	176	105	170	132	43	49	81	260	47	122	200	101	62	44	100	6.27984e+07	Nrp2	FALSE	FALSE	TRUE
chr1	72324661	72324831	170	110	93	61	61	68	51	34	72	88	92	79	60	69	42	54	77	7.23248e+07	Pecr	FALSE	FALSE	TRUE
chr1	132576390	132576560	170	124	115	42	117	61	45	35	40	142	53	78	82	50	84	47	59	1.32576e+08	C4bp-ps1	FALSE	FALSE	TRUE
chr1	132986841	132987011	170	103	95	98	78	54	75	83	111	127	175	114	83	79	78	100	123	1.32987e+08	Mapkapk2	FALSE	TRUE	FALSE
chr1	133183563	133183733	170	56	100	79	48	43	50	69	98	44	145	72	71	47	38	58	70	1.33184e+08	Srgap2	FALSE	TRUE	FALSE
chr1	135110605	135110775	170	206	333	189	199	158	124	168	215	248	348	286	340	232	186	242	276	1.35111e+08	Plekha6	FALSE	TRUE	FALSE
chr1	13333167	13333336	169	39	79	70	49	29	24	89	72	40	121	69	37	34	44	70	68	1.33332e+07	Ncoa2	FALSE	TRUE	FALSE
chr1	21294815	21294984	169	81	78	59	82	76	46	50	61	68	123	57	62	68	86	43	75	2.12949e+07	Gm4956	TRUE	FALSE	FALSE
chr1	67139045	67139214	169	36	10	14	80	87	70	13	21	47	8	22	86	104	43	29	21	6.71391e+07	Cps1	FALSE	FALSE	FALSE
chr1	134664084	134664253	169	56	144	166	84	65	99	207	145	100	219	150	84	66	167	149	123	1.34664e+08	Nfasc	FALSE	TRUE	FALSE
chr1	135582516	135582685	169	234	201	186	184	175	102	175	215	249	203	213	159	146	112	198	222	1.35583e+08	Lax1	FALSE	FALSE	FALSE
chr1	152240211	152240380	169	28	26	31	103	36	44	54	14	29	47	36	119	43	79	48	20	1.5224e+08	BC003331	TRUE	FALSE	FALSE
chr1	163805921	163806090	169	103	131	134	71	56	48	137	141	99	117	127	58	55	55	117	104	1.63806e+08	AI848100	FALSE	TRUE	FALSE
chr1	164408059	164408228	169	9	17	29	51	18	24	35	32	7	139	25	48	37	91	28	19	1.64408e+08	Dnm3	TRUE	FALSE	FALSE
chr1	172421384	172421553	169	33	85	51	93	117	34	31	38	43	31	62	96	88	41	30	36	1.72421e+08	Nos1ap	FALSE	FALSE	TRUE
chr1	59008241	59008409	168	97	85	105	45	52	106	120	110	111	199	92	46	68	190	113	76	5.90083e+07	Trak2	TRUE	FALSE	FALSE
chr1	75556115	75556283	168	60	142	141	98	43	133	174	118	113	258	120	76	86	197	116	83	7.55562e+07	Slc4a3	TRUE	FALSE	FALSE
chr1	163000743	163000911	168	129	146	224	123	98	288	304	249	103	438	168	109	156	459	186	183	1.63001e+08	Dars2	TRUE	FALSE	FALSE
chr1	13457373	13457540	167	176	176	146	260	181	104	128	123	129	154	162	225	193	164	115	162	13457445	Ncoa2	FALSE	FALSE	TRUE
chr1	23003609	23003776	167	240	201	126	289	384	161	79	139	203	53	173	245	389	178	118	123	2.30037e+07	4933415F23Rik	FALSE	FALSE	TRUE
chr1	40285992	40286159	167	153	97	46	88	187	82	33	44	129	25	71	107	140	59	26	34	4.02861e+07	Il1r1	FALSE	FALSE	TRUE
chr1	72918527	72918694	167	223	263	241	230	103	141	294	271	269	322	245	125	116	257	257	252	7.29186e+07	Igfbp5	FALSE	TRUE	FALSE
chr1	88608631	88608798	167	105	108	34	80	77	48	11	32	106	50	70	83	81	57	38	38	8.86088e+07	Dis3l2	FALSE	FALSE	TRUE
chr1	90110304	90110471	167	649	524	231	293	374	182	146	214	663	295	341	327	385	207	191	280	9.01104e+07	Ugt1a1	FALSE	FALSE	TRUE
chr1	94808464	94808631	167	53	54	63	70	29	65	61	89	47	201	62	66	51	119	55	74	9.48086e+07	Rnpepl1	TRUE	FALSE	FALSE
chr1	95019877	95020044	167	145	172	144	73	132	45	117	195	168	304	154	100	149	110	115	193	9.502e+07	Agxt	FALSE	TRUE	FALSE
chr1	95071053	95071220	167	145	110	135	128	134	96	154	125	176	219	132	155	110	134	137	116	9.50711e+07	2310007B03Rik	FALSE	TRUE	FALSE
chr1	120927860	120928027	167	158	196	266	125	131	303	314	338	145	599	242	116	176	597	254	285	120927944	Gli2	TRUE	FALSE	FALSE
chr1	9959124	9959290	166	141	115	176	193	98	88	208	193	101	342	166	145	101	224	202	173	9.95922e+06	Lrrc67	TRUE	FALSE	FALSE
chr1	51939673	51939839	166	189	243	85	135	144	96	62	58	235	125	133	127	173	101	77	124	5.19398e+07	Myo1b	FALSE	FALSE	FALSE
chr1	74854375	74854541	166	115	125	209	56	53	156	243	275	113	306	155	54	67	334	182	191	7.48544e+07	Wnt10a	TRUE	FALSE	FALSE
chr1	76908143	76908309	166	285	260	204	99	138	74	141	262	251	211	221	122	138	66	171	263	7.69082e+07	Gm17751	FALSE	FALSE	FALSE
chr1	90315683	90315849	166	159	97	66	113	84	24	45	57	154	54	71	72	54	43	38	68	9.03157e+07	Spp2	FALSE	FALSE	TRUE
chr1	107804957	107805123	166	89	120	128	48	45	85	142	148	143	182	99	58	42	67	101	110	1.07805e+08	Zcchc2	FALSE	TRUE	FALSE
chr1	135849938	135850104	166	34	126	97	68	32	86	148	72	50	403	107	75	35	156	130	72	1.3585e+08	Prelp	FALSE	TRUE	FALSE
chr1	167690738	167690904	166	129	184	159	171	101	95	164	196	141	363	185	148	136	113	166	179	1.67691e+08	Creg1	FALSE	TRUE	FALSE
chr1	168269340	168269506	166	31	74	84	82	21	35	103	85	22	258	119	92	37	65	88	97	168269438	Tada1	FALSE	TRUE	FALSE
chr1	173134491	173134657	166	190	177	78	109	115	48	61	82	148	108	115	99	90	85	63	99	1.73135e+08	Pcp4l1	FALSE	FALSE	TRUE
chr1	173486563	173486729	166	76	84	47	57	92	46	19	51	40	28	60	95	121	45	24	38	1.73487e+08	Cd244	FALSE	FALSE	TRUE
chr1	193452474	193452640	166	71	180	145	71	67	117	182	165	43	370	134	71	76	176	133	105	1.93453e+08	Ints7	FALSE	TRUE	FALSE
chr1	87749927	87750092	165	93	218	124	83	81	35	124	141	78	368	160	117	74	72	112	119	8.775e+07	Itm2c	FALSE	TRUE	FALSE
chr1	88524923	88525088	165	35	140	31	59	40	19	9	9	48	56	50	74	25	22	13	11	8.8525e+07	Cops7b	FALSE	FALSE	TRUE
chr1	90174891	90175056	165	318	352	324	209	138	293	293	398	377	794	322	242	177	546	311	326	90174990	Hjurp	TRUE	FALSE	FALSE
chr1	170432450	170432615	165	74	99	147	99	54	63	140	170	121	257	171	84	66	64	174	120	1.70433e+08	Pbx1	FALSE	TRUE	FALSE
chr1	193221349	193221514	165	102	105	161	100	70	166	221	171	70	390	158	95	110	398	163	168	1.93221e+08	Ppp2r5a	TRUE	FALSE	FALSE
chr1	24618358	24618522	164	472	105	81	491	194	175	46	45	628	20	111	518	211	115	70	30	2.46184e+07	Col19a1	FALSE	FALSE	TRUE
chr1	37403192	37403356	164	70	181	79	88	72	69	60	68	33	271	119	137	88	90	63	95	3.74033e+07	Inpp4a	FALSE	TRUE	FALSE
chr1	51971051	51971215	164	90	36	30	37	79	26	19	20	110	5	33	56	91	24	22	11	5.19712e+07	Myo1b	FALSE	FALSE	TRUE
chr1	56597003	56597167	164	56	17	30	75	137	88	23	48	52	9	42	63	152	42	47	49	5.65971e+07	Hsfy2	FALSE	FALSE	FALSE
chr1	94831184	94831348	164	50	87	74	110	43	97	100	81	68	256	64	75	41	198	52	63	9.48313e+07	Capn10	TRUE	FALSE	FALSE
chr1	132983602	132983766	164	147	178	241	154	72	209	297	284	163	538	202	107	120	406	231	199	1.32984e+08	Mapkapk2	TRUE	FALSE	FALSE
chr1	133741637	133741801	164	116	151	134	55	37	100	136	166	96	322	122	53	52	174	89	154	133741707	Slc41a1	TRUE	FALSE	FALSE
chr1	135161965	135162129	164	52	79	79	44	40	63	69	82	67	219	74	45	44	67	53	74	1.35162e+08	Gm19461	FALSE	TRUE	FALSE
chr1	135258753	135258917	164	300	371	285	151	199	169	207	369	300	323	297	157	211	131	232	339	1.35259e+08	Etnk2	FALSE	TRUE	FALSE
chr1	135989590	135989754	164	24	42	24	67	13	47	27	27	27	135	37	58	17	102	41	34	1.3599e+08	Btg2	TRUE	FALSE	FALSE
chr1	157655606	157655770	164	163	257	184	216	137	86	167	209	182	340	221	176	169	189	189	244	1.57656e+08	Qsox1	FALSE	TRUE	FALSE
chr1	167621744	167621908	164	5	29	20	9	1	17	11	26	10	102	30	12	5	38	30	26	1.67622e+08	Rcsd1	TRUE	FALSE	FALSE
chr1	182882735	182882899	164	74	83	46	110	104	47	29	52	90	42	56	115	149	78	34	40	1.82883e+08	Tmem63a	FALSE	FALSE	TRUE
chr1	133034864	133035027	163	26	36	30	100	28	50	40	30	15	111	41	98	54	131	44	46	1.33035e+08	Dyrk3	TRUE	FALSE	FALSE
chr1	9621689	9621851	162	93	98	81	93	50	40	66	96	115	115	87	55	59	56	65	118	9.62176e+06	2610203C22Rik	FALSE	TRUE	FALSE
chr1	51827122	51827284	162	59	47	69	47	38	51	65	95	58	123	78	33	24	55	72	97	5.18272e+07	Myo1b	FALSE	TRUE	FALSE
chr1	62770534	62770696	162	198	144	94	117	214	88	75	76	192	75	112	171	296	88	61	83	62770626	Nrp2	FALSE	FALSE	TRUE
chr1	121419358	121419520	162	105	101	102	110	60	49	92	127	156	216	119	65	57	65	120	107	1.21419e+08	Tmem185b	FALSE	TRUE	FALSE
chr1	129504853	129505015	162	66	58	59	123	81	56	39	49	72	77	56	105	56	104	36	53	1.29505e+08	Tmem163	FALSE	FALSE	TRUE
chr1	178756412	178756574	162	386	472	412	137	155	137	419	488	348	589	413	123	192	119	416	353	1.78756e+08	Sdccag8	FALSE	TRUE	FALSE
chr1	189308777	189308939	162	192	174	68	154	179	105	31	71	144	72	110	143	157	102	57	52	1.89309e+08	Esrrg	FALSE	FALSE	FALSE
chr1	189581954	189582116	162	138	83	39	64	47	27	18	27	192	29	57	54	80	38	24	28	1.89582e+08	Esrrg	FALSE	FALSE	TRUE
chr1	193464128	193464290	162	147	117	112	79	105	73	109	124	149	138	139	138	104	91	118	149	1.93464e+08	Ints7	FALSE	FALSE	FALSE
chr1	195055983	195056145	162	210	147	67	90	112	80	28	35	318	56	75	94	131	57	31	32	1.95056e+08	Hsd11b1	FALSE	FALSE	TRUE
chr1	40212986	40213147	161	57	72	51	74	101	37	25	48	47	27	52	85	117	60	24	36	4.02131e+07	Il1r1	FALSE	FALSE	TRUE
chr1	74386957	74387118	161	84	144	141	105	56	202	166	171	108	529	164	97	127	415	178	160	7.4387e+07	Pnkd	TRUE	FALSE	FALSE
chr1	92953091	92953252	161	51	120	65	67	39	42	65	44	42	141	80	82	38	42	65	58	9.29531e+07	Lrrfip1	FALSE	FALSE	TRUE
chr1	107800383	107800544	161	75	39	37	86	106	34	28	35	62	15	40	74	109	50	31	50	1.078e+08	Zcchc2	FALSE	FALSE	TRUE
chr1	107823444	107823605	161	84	60	33	53	76	40	28	34	113	31	46	59	81	44	22	57	1.07824e+08	Zcchc2	FALSE	FALSE	TRUE
chr1	174627699	174627860	161	72	49	45	129	134	79	37	58	102	28	41	94	145	61	24	43	1.74628e+08	Crp	FALSE	FALSE	TRUE
chr1	186632569	186632730	161	83	85	133	122	81	70	141	131	91	152	93	77	62	77	94	103	1.86633e+08	Mosc1	FALSE	TRUE	FALSE
chr1	36166980	36167140	160	150	137	183	25	37	144	193	229	125	359	154	27	79	211	163	163	3.61671e+07	Hs6st1	TRUE	FALSE	FALSE
chr1	39959819	39959979	160	90	56	30	40	53	44	23	34	103	15	34	61	81	38	32	43	3.99599e+07	Map4k4	FALSE	FALSE	TRUE
chr1	52522743	52522903	160	107	86	51	117	125	66	23	51	133	33	72	129	103	72	45	36	5.25228e+07	Nab1	FALSE	FALSE	TRUE
chr1	74350401	74350561	160	39	75	61	172	55	48	75	67	41	211	62	123	55	194	61	66	7.43505e+07	Tmbim1	TRUE	FALSE	FALSE
chr1	74351044	74351204	160	133	127	73	112	111	85	44	68	166	126	91	112	129	66	44	97	7.43512e+07	Tmbim1	FALSE	FALSE	TRUE
chr1	135830939	135831099	160	65	120	123	60	62	66	142	147	81	275	135	64	55	135	143	131	1.35831e+08	Prelp	FALSE	TRUE	FALSE
chr1	135961919	135962079	160	187	149	149	180	194	122	136	133	160	117	162	145	178	126	120	181	1.35962e+08	Btg2	FALSE	FALSE	TRUE
chr1	188609371	188609531	160	101	75	75	109	225	115	55	85	106	19	91	190	229	125	78	66	1.88609e+08	Rrp15	FALSE	FALSE	FALSE
chr1	37288083	37288242	159	74	64	39	91	115	58	22	54	46	43	53	110	96	79	35	59	3.72882e+07	Cnga3	FALSE	FALSE	FALSE
chr1	52211905	52212064	159	5	44	51	21	13	27	51	57	12	123	42	20	17	104	29	52	5.2212e+07	Stat1	TRUE	FALSE	FALSE
chr1	78485074	78485233	159	45	108	95	202	63	96	137	102	88	389	102	128	93	236	112	105	7.84852e+07	Farsb	TRUE	FALSE	FALSE
chr1	82141941	82142100	159	54	90	43	113	107	68	10	34	71	65	64	170	102	120	37	34	8.2142e+07	Irs1	FALSE	FALSE	TRUE
chr1	82812671	82812830	159	177	171	264	217	227	194	346	289	170	327	207	149	169	354	227	248	8.28127e+07	Agfg1	TRUE	FALSE	FALSE
chr1	89197589	89197748	159	39	41	63	25	24	61	88	65	17	128	55	18	13	96	58	70	8.91977e+07	Efhd1	TRUE	FALSE	FALSE
chr1	136415385	136415544	159	89	63	53	65	60	41	45	59	115	66	61	61	78	64	54	66	1.36415e+08	Rabif	FALSE	FALSE	TRUE
chr1	172105378	172105537	159	65	68	84	111	37	112	100	85	57	156	73	100	45	136	71	97	1.72105e+08	Uap1	TRUE	FALSE	FALSE
chr1	182126748	182126907	159	97	107	114	121	72	50	120	140	139	111	100	64	72	67	91	93	1.82127e+08	Adck3	FALSE	FALSE	FALSE
chr1	191935591	191935750	159	66	75	84	16	20	59	101	81	32	263	72	24	37	113	86	53	1.91936e+08	Prox1	FALSE	TRUE	FALSE
chr1	71768929	71769087	158	14	4	21	72	159	62	29	25	9	5	28	77	163	49	41	18	7.1769e+07	Apol7d	FALSE	FALSE	FALSE
chr1	109456199	109456357	158	134	144	61	116	158	39	26	52	140	57	63	112	127	49	32	34	1.09456e+08	Serpinb8	FALSE	FALSE	TRUE
chr1	139648379	139648537	158	70	65	97	66	78	39	83	127	52	100	99	64	67	54	86	133	1.39648e+08	Mir181a-1	FALSE	TRUE	FALSE
chr1	186499549	186499707	158	152	164	204	102	76	265	264	213	171	359	187	69	131	314	175	198	1.865e+08	4930488B22Rik	TRUE	FALSE	FALSE
chr1	190187526	190187684	158	118	90	60	86	100	38	39	36	101	78	89	64	79	66	35	99	1.90188e+08	Ush2a	FALSE	FALSE	TRUE
chr1	193007082	193007240	158	164	276	338	526	140	309	406	411	229	1134	290	301	187	845	346	298	1.93007e+08	Atf3	TRUE	FALSE	FALSE
chr1	7078793	7078950	157	11	34	31	76	24	29	38	32	13	82	34	67	29	120	30	36	7.0789e+06	Pcmtd1	TRUE	FALSE	FALSE
chr1	39482456	39482613	157	125	207	123	110	139	70	136	109	84	149	150	96	99	90	111	121	3.94825e+07	Tbc1d8	FALSE	FALSE	TRUE
chr1	72353982	72354139	157	100	127	183	67	60	263	229	181	88	250	144	75	89	332	151	143	7.23541e+07	Xrcc5	TRUE	FALSE	FALSE
chr1	184744798	184744955	157	44	51	40	50	34	70	34	50	38	116	57	33	40	134	43	56	1.84745e+08	Susd4	TRUE	FALSE	FALSE
chr1	193450050	193450207	157	28	94	46	25	36	8	41	42	12	101	54	36	27	23	36	40	1.9345e+08	Ints7	FALSE	FALSE	TRUE
chr1	102551878	102552034	156	12	0	10	39	116	67	15	13	12	1	15	38	112	31	15	20	1.02552e+08	Gm20268	FALSE	FALSE	FALSE
chr1	129629333	129629489	156	214	174	186	163	172	90	171	208	285	265	172	124	158	131	130	192	129629333	Acmsd	FALSE	TRUE	FALSE
chr1	135016702	135016858	156	134	166	71	85	110	64	43	66	214	84	88	100	125	82	53	79	1.35017e+08	Ppp1r15b	FALSE	FALSE	TRUE
chr1	162909260	162909416	156	136	92	34	56	73	46	27	21	109	44	46	47	58	40	23	40	1.62909e+08	Serpinc1	FALSE	FALSE	FALSE
chr1	195100737	195100893	156	107	155	146	118	71	64	130	181	156	323	141	99	104	126	137	145	1.95101e+08	G0s2	FALSE	TRUE	FALSE
chr1	64799756	64799911	155	389	252	502	111	158	161	570	587	276	513	327	75	121	144	394	355	6.47998e+07	Fzd5	FALSE	TRUE	FALSE
chr1	135226190	135226345	155	38	61	40	95	51	70	38	45	31	112	45	74	55	101	34	54	1.35226e+08	Kiss1	TRUE	FALSE	FALSE
chr1	177422000	177422155	155	16	39	41	17	15	35	45	44	0	106	51	19	27	47	50	38	1.77422e+08	Rgs7	FALSE	TRUE	FALSE
chr1	182142481	182142636	155	54	88	82	86	75	75	87	90	24	202	92	64	52	116	78	107	1.82143e+08	Adck3	FALSE	TRUE	FALSE
chr1	182210002	182210157	155	68	59	108	103	57	81	116	131	67	158	84	82	77	143	62	117	1.8221e+08	Psen2	TRUE	FALSE	FALSE
chr1	193452852	193453007	155	137	179	105	99	113	92	92	75	59	131	137	121	128	98	79	99	1.93453e+08	Ints7	FALSE	FALSE	TRUE
chr1	40189760	40189914	154	37	156	49	69	62	18	21	30	56	57	91	68	33	48	27	32	40189761	Gm16894	FALSE	FALSE	TRUE
chr1	74759525	74759679	154	121	92	116	114	145	75	106	137	130	111	133	98	99	93	113	181	74759525	Cyp27a1	FALSE	FALSE	FALSE
chr1	138125046	138125200	154	125	137	189	59	71	238	245	204	128	325	180	51	83	354	193	208	1.38125e+08	5730559C18Rik	TRUE	FALSE	FALSE
chr1	155508572	155508726	154	62	93	95	43	61	88	105	109	84	209	87	51	65	183	79	97	1.55509e+08	Rgs8	TRUE	FALSE	FALSE
chr1	166561958	166562112	154	56	112	100	35	21	31	95	127	13	138	90	29	37	50	77	87	1.66562e+08	Dpt	FALSE	TRUE	FALSE
chr1	192895659	192895813	154	46	24	26	41	78	36	13	33	58	11	36	59	123	45	22	43	1.92896e+08	Nsl1	FALSE	FALSE	FALSE
chr1	94832304	94832457	153	56	63	62	52	25	33	71	79	38	119	70	43	31	40	68	82	9.48324e+07	Capn10	FALSE	TRUE	FALSE
chr1	121196797	121196950	153	39	119	63	73	62	21	57	60	39	201	85	73	52	37	64	61	1.21197e+08	Inhbb	FALSE	FALSE	TRUE
chr1	167414973	167415126	153	268	93	96	370	460	155	77	132	414	71	107	339	460	161	80	93	1.67415e+08	Adcy10	FALSE	FALSE	TRUE
chr1	58353263	58353415	152	33	35	47	12	12	39	42	54	41	104	29	20	18	37	24	30	5.83533e+07	Aox3l1	TRUE	FALSE	FALSE
chr1	129174760	129174912	152	74	19	21	67	92	64	15	26	76	7	31	52	104	25	25	28	1.29175e+08	Mgat5	FALSE	FALSE	TRUE
chr1	152239860	152240012	152	32	42	66	168	46	48	93	66	28	119	50	88	62	98	54	40	1.5224e+08	Tpr	TRUE	FALSE	FALSE
chr1	36932061	36932212	151	95	114	105	75	98	61	93	122	115	106	103	62	91	66	75	111	3.69321e+07	Tmem131	FALSE	TRUE	FALSE
chr1	89652440	89652591	151	41	60	97	312	75	114	137	88	60	155	89	176	79	177	103	87	8.96525e+07	Atg16l1	TRUE	FALSE	FALSE
chr1	121396155	121396306	151	150	271	182	87	121	57	163	229	129	393	219	95	95	94	183	216	1.21396e+08	Ralb	FALSE	TRUE	FALSE
chr1	167699411	167699562	151	163	102	90	274	193	132	67	98	153	97	93	194	147	147	105	89	1.67699e+08	Creg1	FALSE	FALSE	TRUE
chr1	178654599	178654750	151	67	88	88	31	29	41	61	112	95	158	97	58	48	89	72	120	1.78655e+08	Cep170	FALSE	TRUE	FALSE
chr1	182140144	182140295	151	107	142	105	129	128	73	80	134	156	162	116	119	105	97	109	117	1.8214e+08	Adck3	FALSE	TRUE	FALSE
chr1	193916216	193916367	151	25	56	35	96	34	43	42	40	25	142	40	67	41	104	40	38	1.93916e+08	Traf5	TRUE	FALSE	FALSE
chr1	91351182	91351332	150	33	79	59	201	21	58	91	56	24	198	66	133	27	206	66	69	9.13513e+07	Agap1	TRUE	FALSE	FALSE
chr1	134598886	134599036	150	28	65	89	55	25	61	120	88	12	203	77	36	56	123	89	55	1.34599e+08	Nfasc	FALSE	TRUE	FALSE
chr1	163198356	163198506	150	281	186	115	283	282	144	91	94	283	50	134	251	318	112	87	126	1.63198e+08	Prdx6	FALSE	FALSE	TRUE
chr1	174238223	174238373	150	84	147	144	78	48	95	178	138	106	274	138	72	86	128	151	110	1.74238e+08	Igsf8	FALSE	TRUE	FALSE
chr1	192028721	192028871	150	59	80	64	29	55	52	43	102	72	83	73	35	84	44	64	82	1.92029e+08	Prox1	FALSE	FALSE	FALSE
chr1	21028073	21028222	149	17	117	23	34	22	69	29	24	38	197	63	45	32	74	43	24	2.10281e+07	Tram2	FALSE	FALSE	TRUE
chr1	79772573	79772722	149	24	46	35	19	9	49	33	51	16	107	32	15	17	89	31	37	7.97726e+07	Mrpl44	TRUE	FALSE	FALSE
chr1	91810298	91810447	149	98	112	38	75	34	46	10	32	88	70	71	66	40	34	9	73	9.18104e+07	Gbx2	FALSE	FALSE	TRUE
chr1	173021007	173021156	149	63	65	56	144	97	60	60	50	66	44	84	110	98	94	73	68	1.73021e+08	1700009P17Rik	FALSE	FALSE	TRUE
chr1	187187055	187187204	149	29	73	44	113	18	34	45	59	32	213	52	65	27	127	50	66	1.87187e+08	Eprs	FALSE	TRUE	FALSE
chr1	36596169	36596317	148	30	59	71	107	47	73	83	96	12	330	62	90	36	230	63	47	3.65963e+07	Ankrd39	TRUE	FALSE	FALSE
chr1	54599873	54600021	148	118	107	46	56	69	53	16	35	95	29	53	69	74	51	18	29	5.45999e+07	Pgap1	FALSE	FALSE	FALSE
chr1	58458348	58458496	148	138	123	65	97	64	47	54	47	165	54	101	76	56	39	67	107	5.84584e+07	Bzw1	FALSE	FALSE	FALSE
chr1	67150609	67150757	148	193	151	136	292	259	212	125	166	148	100	171	250	261	208	148	195	6.71507e+07	Cps1	FALSE	FALSE	FALSE
chr1	75165602	75165750	148	487	416	395	451	436	407	395	400	438	559	399	556	443	673	362	405	7.51657e+07	Zfand2b	TRUE	FALSE	FALSE
chr1	98762749	98762897	148	52	98	43	127	80	48	37	39	28	61	50	142	76	50	40	26	9.87628e+07	Slco4c1	FALSE	FALSE	TRUE
chr1	181476300	181476448	148	20	39	44	50	28	39	52	56	20	141	37	40	31	95	38	38	1.81476e+08	Tfb2m	TRUE	FALSE	FALSE
chr1	87953028	87953175	147	180	235	245	198	172	114	253	295	179	479	278	192	144	196	240	312	8.79531e+07	Psmd1	FALSE	TRUE	FALSE
chr1	170296459	170296606	147	146	293	142	370	400	165	117	155	153	309	196	222	258	213	123	193	1.70297e+08	Pbx1	FALSE	TRUE	FALSE
chr1	182295344	182295491	147	25	35	38	48	21	51	39	47	29	126	40	48	31	75	39	45	1.82295e+08	Itpkb	TRUE	FALSE	FALSE
chr1	13427892	13428038	146	117	61	35	158	150	84	31	32	93	17	40	108	135	53	32	23	1.3428e+07	Ncoa2	FALSE	FALSE	TRUE
chr1	34160621	34160767	146	232	188	142	132	162	90	138	182	179	280	179	109	162	127	178	189	3.41607e+07	Dst	FALSE	TRUE	FALSE
chr1	93333299	93333445	146	281	287	327	177	189	366	406	358	336	766	329	215	253	739	329	322	9.33333e+07	Per2	TRUE	FALSE	FALSE
chr1	95375541	95375686	145	89	164	126	337	58	135	160	132	100	535	134	228	86	349	145	130	9.53756e+07	Sept2	TRUE	FALSE	FALSE
chr1	145510451	145510596	145	66	32	37	170	148	51	26	60	67	31	47	114	174	75	50	44	1.45511e+08	Cdc73	FALSE	FALSE	FALSE
chr1	194274089	194274234	145	119	228	108	203	131	67	56	89	128	195	125	163	97	131	52	109	1.94274e+08	Kcnh1	FALSE	FALSE	TRUE
chr1	67169369	67169513	144	221	188	131	292	274	143	112	141	280	153	177	231	242	295	118	147	67169483	Cps1	FALSE	FALSE	TRUE
chr1	95721972	95722116	144	29	39	24	10	8	34	27	30	9	109	26	13	7	66	15	30	9.5722e+07	D2hgdh	TRUE	FALSE	FALSE
chr1	135000047	135000191	144	86	70	86	36	54	91	99	94	68	187	90	34	59	175	85	74	1.35e+08	Pik3c2b	TRUE	FALSE	FALSE
chr1	166182774	166182918	144	70	52	55	113	166	70	55	54	66	24	45	93	140	97	30	53	1.66183e+08	Slc19a2	FALSE	FALSE	FALSE
chr1	54580692	54580835	143	237	93	66	264	229	104	52	81	248	51	95	240	240	132	87	72	5.45808e+07	Pgap1	FALSE	FALSE	TRUE
chr1	167391122	167391265	143	245	272	343	783	211	382	421	344	258	909	253	336	209	705	280	289	1.67391e+08	Brp44	TRUE	FALSE	FALSE
chr1	189942153	189942296	143	121	146	180	82	65	261	215	193	149	435	182	71	113	366	208	172	1.89942e+08	Esrrg	TRUE	FALSE	FALSE
chr1	89471067	89471209	142	136	73	70	155	97	68	51	87	145	66	75	116	106	95	58	82	8.94712e+07	Neu2	FALSE	FALSE	TRUE
chr1	154664224	154664366	142	8	19	29	14	3	17	23	41	14	110	25	10	9	56	16	34	1.54664e+08	Ncf2	FALSE	TRUE	FALSE
chr1	31153361	31153502	141	184	264	291	112	126	89	307	372	256	531	299	111	93	145	299	312	3.11534e+07	Lgsn	FALSE	TRUE	FALSE
chr1	33270848	33270989	141	81	44	40	58	86	47	15	31	129	9	47	63	104	48	19	29	3.32709e+07	Prim2	FALSE	FALSE	TRUE
chr1	73975889	73976030	141	88	129	192	92	91	178	220	239	97	429	184	95	105	274	180	181	7.3976e+07	Tns1	FALSE	TRUE	FALSE
chr1	133903450	133903591	141	127	73	41	66	95	58	11	22	140	39	50	101	117	52	19	33	1.33904e+08	Elk4	FALSE	FALSE	TRUE
chr1	134223505	134223646	141	88	80	115	44	50	98	100	162	135	222	98	54	52	168	90	109	1.34224e+08	Nuak2	TRUE	FALSE	FALSE
chr1	107886775	107886915	140	29	94	80	124	40	58	87	111	37	304	106	135	69	257	109	120	1.07887e+08	Zcchc2	TRUE	FALSE	FALSE
chr1	153602033	153602173	140	69	71	68	19	16	44	71	82	32	208	59	27	34	116	53	68	1.53602e+08	Edem3	TRUE	FALSE	FALSE
chr1	93356173	93356312	139	23	89	54	179	45	66	67	60	37	253	69	140	61	191	50	82	9.33562e+07	Per2	TRUE	FALSE	FALSE
chr1	102603612	102603751	139	120	64	51	162	222	90	41	42	104	18	60	90	211	59	54	44	1.02604e+08	Gm20268	FALSE	FALSE	FALSE
chr1	180266624	180266763	139	71	139	118	364	16	68	141	130	100	411	109	220	27	328	144	93	1.80267e+08	Hnrnpu	TRUE	FALSE	FALSE
chr1	181476482	181476621	139	10	35	23	55	19	30	19	34	13	114	35	46	33	100	31	42	1.81477e+08	Cnst	TRUE	FALSE	FALSE
chr1	182687782	182687921	139	51	75	54	40	49	27	41	67	74	105	85	51	27	43	65	72	1.82688e+08	Acbd3	FALSE	TRUE	FALSE
chr1	193237550	193237689	139	82	24	23	81	117	71	15	32	92	16	33	95	125	49	30	47	1.93238e+08	Ppp2r5a	FALSE	FALSE	TRUE
chr1	37033669	37033807	138	78	36	30	45	98	28	13	12	107	5	33	43	83	25	17	24	3.70338e+07	Tmem131	FALSE	FALSE	TRUE
chr1	142303628	142303766	138	5	3	13	58	101	81	11	22	2	5	13	49	68	22	14	19	1.42304e+08	Kcnt2	FALSE	FALSE	FALSE
chr1	84874350	84874487	137	81	118	56	27	37	15	20	47	40	52	67	32	42	27	33	56	8.48744e+07	Fbxo36	FALSE	FALSE	TRUE
chr1	121120644	121120781	137	18	68	41	33	34	38	35	58	27	177	57	22	16	90	46	61	1.21121e+08	Gli2	TRUE	FALSE	FALSE
chr1	133554783	133554920	137	18	32	30	8	14	49	26	40	5	117	28	10	23	68	24	34	1.33555e+08	Ctse	TRUE	FALSE	FALSE
chr1	137067172	137067309	137	28	63	49	48	30	70	55	58	24	170	53	36	27	106	35	61	1.37067e+08	Gpr37l1	TRUE	FALSE	FALSE
chr1	187250524	187250661	137	29	29	46	10	16	13	38	69	17	152	49	10	14	38	30	63	1.87251e+08	Eprs	FALSE	TRUE	FALSE
chr1	191954920	191955057	137	97	90	32	68	51	29	9	20	141	32	41	56	49	26	18	18	1.91955e+08	Prox1	FALSE	FALSE	TRUE
chr1	40232082	40232218	136	80	259	157	127	79	52	132	115	42	263	202	111	80	74	136	164	4.02322e+07	Il1r1	FALSE	TRUE	FALSE
chr1	58667170	58667306	136	122	140	37	59	146	70	8	27	146	29	63	76	111	43	16	22	5.86673e+07	Ndufb3	FALSE	FALSE	FALSE
chr1	89910493	89910629	136	120	43	39	132	206	107	22	51	163	12	53	158	205	72	38	45	8.99105e+07	Usp40	FALSE	FALSE	TRUE
chr1	128263437	128263573	136	94	134	96	61	80	44	78	102	114	229	117	95	95	73	99	108	1.28264e+08	Nckap5	FALSE	TRUE	FALSE
chr1	166457018	166457154	136	185	233	96	172	160	90	57	89	181	117	143	147	179	114	61	82	1.66457e+08	Atp1b1	FALSE	FALSE	FALSE
chr1	172105114	172105250	136	58	90	58	227	35	67	84	61	46	192	64	128	52	136	68	70	1.72105e+08	Uap1	TRUE	FALSE	FALSE
chr1	193303752	193303888	136	85	136	145	144	95	73	177	168	108	188	129	99	92	94	130	143	1.93304e+08	Ppp2r5a	FALSE	TRUE	FALSE
chr1	75314319	75314454	135	71	117	132	325	82	133	204	115	99	413	127	202	104	359	144	131	7.53144e+07	Dnpep	TRUE	FALSE	FALSE
chr1	9628806	9628940	134	59	61	53	115	90	85	40	65	120	70	77	106	94	94	64	96	9.62886e+06	2610203C22Rik	FALSE	FALSE	TRUE
chr1	13689817	13689951	134	81	49	69	104	31	31	61	94	125	72	96	88	23	76	110	108	1.36898e+07	Xkr9	FALSE	FALSE	FALSE
chr1	39200622	39200756	134	123	179	257	230	191	198	266	352	227	552	260	205	195	300	236	296	3.92007e+07	Npas2	FALSE	TRUE	FALSE
chr1	43362316	43362450	134	172	154	178	155	174	106	175	237	181	152	182	142	142	120	192	185	4.33624e+07	Nck2	FALSE	FALSE	FALSE
chr1	88303626	88303760	134	16	46	47	22	21	44	43	61	32	107	58	30	23	58	35	78	8.83037e+07	Nmur1	TRUE	FALSE	FALSE
chr1	191931604	191931738	134	51	19	32	122	109	51	38	40	58	18	39	104	99	76	43	44	1.91932e+08	Prox1	FALSE	FALSE	FALSE
chr1	72335415	72335548	133	92	102	43	75	103	42	26	44	110	28	70	71	70	50	45	68	7.23354e+07	Tmem169	FALSE	FALSE	FALSE
chr1	121997179	121997312	133	205	282	315	161	153	158	348	378	318	408	275	171	204	126	277	304	1.21997e+08	Dbi	FALSE	TRUE	FALSE
chr1	138917290	138917423	133	176	204	97	160	190	109	62	101	207	136	131	159	201	74	64	157	1.38917e+08	Nr5a2	FALSE	FALSE	TRUE
chr1	156930385	156930518	133	24	52	40	80	7	23	49	40	26	262	36	63	6	185	33	30	1.5693e+08	Ier5	TRUE	FALSE	FALSE
chr1	59727605	59727737	132	55	46	81	63	31	77	108	69	20	144	61	53	26	151	79	43	5.97277e+07	Sumo1	TRUE	FALSE	FALSE
chr1	54602688	54602819	131	60	21	14	51	104	44	6	21	57	3	18	42	94	10	12	10	54602775	Pgap1	FALSE	FALSE	TRUE
chr1	120207659	120207790	131	8	42	14	33	3	29	11	20	18	108	23	38	8	51	20	29	1.20208e+08	Tsn	FALSE	TRUE	FALSE
chr1	184913200	184913331	131	28	69	61	54	26	53	71	76	54	345	94	54	40	191	94	81	1.84913e+08	Tlr5	TRUE	FALSE	FALSE
chr1	62771956	62772086	130	192	154	175	138	96	188	152	187	242	194	144	148	136	277	135	149	6.2772e+07	Nrp2	TRUE	FALSE	FALSE
chr1	95029415	95029544	129	165	242	335	199	119	286	439	380	183	864	276	188	227	810	274	283	9.50295e+07	Agxt	TRUE	FALSE	FALSE
chr1	107615068	107615196	128	154	114	40	125	97	60	28	44	115	60	63	94	86	40	45	38	1.07615e+08	2310035C23Rik	FALSE	FALSE	TRUE
chr1	95575138	95575265	127	70	117	67	78	83	45	47	72	67	127	95	67	74	69	61	93	9.55751e+07	Bok	FALSE	TRUE	FALSE
chr1	94077380	94077506	126	23	44	37	74	19	52	37	57	17	222	62	75	37	179	66	71	9.40774e+07	Hdac4	TRUE	FALSE	FALSE
chr1	95020715	95020840	125	78	91	71	30	53	32	56	110	74	111	74	34	62	39	69	93	9.50208e+07	Agxt	FALSE	TRUE	FALSE
chr1	121116680	121116804	124	40	161	47	39	46	28	52	37	45	112	58	41	48	21	37	42	121116720	Gli2	FALSE	TRUE	FALSE
chr1	189623165	189623289	124	13	51	70	68	27	16	80	51	28	114	65	74	21	43	61	37	1.89623e+08	Esrrg	FALSE	TRUE	FALSE
chr1	105657946	105658069	123	149	77	50	75	121	32	45	39	203	24	69	48	96	44	46	36	1.05658e+08	Cdh20	FALSE	FALSE	TRUE
chr1	31151729	31151851	122	75	28	21	59	82	44	13	17	124	15	26	59	97	21	20	8	3.11518e+07	Lgsn	FALSE	FALSE	TRUE
chr1	60620012	60620130	118	27	5	16	61	117	88	22	20	39	3	14	76	104	31	13	14	6.06201e+07	Raph1	FALSE	FALSE	FALSE
chr1	66947832	66947950	118	265	91	76	247	296	134	60	93	258	35	96	224	284	145	70	70	66947832	Acadl	FALSE	FALSE	TRUE
chr1	84281083	84281201	118	11	34	27	112	5	34	30	34	10	197	42	87	12	95	48	35	8.42811e+07	Pid1	TRUE	FALSE	FALSE
chr1	159007277	159007395	118	15	34	29	33	17	25	25	48	25	163	33	21	36	116	27	38	1.59007e+08	1700057K13Rik	TRUE	FALSE	FALSE
chr1	133467101	133467217	116	153	155	104	231	214	101	69	127	173	74	147	202	242	141	104	156	1.33467e+08	Avpr1b	FALSE	FALSE	TRUE
chr1	184887358	184887469	111	40	46	44	33	37	48	35	74	64	112	49	42	51	76	42	65	1.84887e+08	Tlr5	TRUE	FALSE	FALSE
chr1	93355628	93355738	110	32	50	33	109	14	39	31	50	15	110	36	54	30	85	29	34	9.33557e+07	Per2	TRUE	FALSE	FALSE
chr1	67124095	67124204	109	51	7	19	35	105	67	17	30	57	1	16	32	86	25	15	26	6.71241e+07	Lancl1	FALSE	FALSE	TRUE
chr1	24621490	24621598	108	41	26	48	407	135	112	55	60	49	14	45	309	124	136	56	50	2.46215e+07	Col19a1	FALSE	FALSE	FALSE
chr1	193244943	193245051	108	30	39	44	23	25	73	39	64	50	81	47	22	50	113	51	65	1.93245e+08	Ppp2r5a	TRUE	FALSE	FALSE
chr1	95375288	95375394	106	39	44	57	142	69	67	67	60	39	110	51	106	66	120	56	54	9.53754e+07	Hdlbp	TRUE	FALSE	FALSE
chr1	138023701	138023804	103	12	54	35	27	18	12	33	34	14	109	42	36	10	22	30	22	138023708	Kif21b	FALSE	FALSE	TRUE
chr1	31151623	31151725	102	64	26	15	51	80	30	6	14	116	16	22	46	77	17	16	6	3.11517e+07	Lgsn	FALSE	FALSE	TRUE
chr1	24618851	24618951	100	23	17	29	301	114	112	36	38	27	16	48	253	98	93	70	40	2.46189e+07	Col19a1	FALSE	FALSE	FALSE
chr1	72071405	72071505	100	44	34	13	20	26	7	5	9	120	7	18	20	15	13	9	10	7.20715e+07	4933417E11Rik	FALSE	FALSE	FALSE
chr1	72334997	72335097	100	122	114	76	48	61	61	65	75	101	70	87	65	94	40	64	93	7.23351e+07	Tmem169	FALSE	FALSE	FALSE
chr1	75657369	75657469	100	111	60	73	24	39	40	58	94	108	53	82	39	41	40	73	104	7.56574e+07	Slc4a3	FALSE	FALSE	FALSE
chr1	84275080	84275180	100	193	129	70	88	133	67	31	54	254	41	86	105	141	75	52	46	8.42751e+07	Pid1	FALSE	FALSE	TRUE
chr1	84281203	84281303	100	9	26	21	98	3	23	20	27	10	162	35	73	11	73	44	28	84281203	Pid1	TRUE	FALSE	FALSE
chr1	90109731	90109831	100	192	53	41	162	270	146	32	54	172	22	57	162	255	102	44	40	9.01098e+07	Ugt1a1	FALSE	FALSE	TRUE
chr1	90185004	90185104	100	92	69	42	49	96	60	18	46	108	38	59	67	93	57	27	48	90185004	Hjurp	FALSE	FALSE	TRUE
chr1	95025054	95025154	100	30	37	54	33	45	80	60	64	31	102	62	49	62	145	52	84	9.50251e+07	Agxt	TRUE	FALSE	FALSE
chr1	95538580	95538680	100	76	30	17	31	110	35	8	13	115	7	21	43	82	11	5	11	9.55387e+07	Stk25	FALSE	FALSE	TRUE
chr1	95538793	95538893	100	99	46	25	33	117	44	13	22	121	9	27	54	103	21	9	13	9.55388e+07	Stk25	FALSE	FALSE	TRUE
chr1	95575008	95575108	100	70	123	64	75	72	36	41	65	77	129	87	58	69	65	53	87	9.55751e+07	Bok	FALSE	TRUE	FALSE
chr1	129251774	129251874	100	46	102	111	52	40	44	87	131	72	141	108	50	37	42	84	95	1.29252e+08	Mgat5	FALSE	TRUE	FALSE
chr1	134214401	134214501	100	78	37	34	56	40	22	20	35	110	18	38	76	58	34	30	42	1.34214e+08	Nuak2	FALSE	FALSE	TRUE
chr1	136139194	136139294	100	73	53	25	51	32	29	15	17	108	29	41	52	38	31	24	35	1.36139e+08	Adora1	FALSE	FALSE	TRUE
chr1	157673382	157673482	100	45	70	35	56	100	36	27	31	51	25	50	79	120	53	31	24	1.57673e+08	Qsox1	FALSE	FALSE	FALSE
chr1	174238068	174238168	100	95	132	106	92	43	85	124	100	99	215	109	82	96	102	101	93	1.74238e+08	Igsf8	FALSE	TRUE	FALSE
chr1	182125418	182125518	100	33	47	67	25	21	87	82	79	93	101	50	22	40	121	47	64	1.82125e+08	Adck3	TRUE	FALSE	FALSE
chr1	188628314	188628414	100	65	47	15	57	71	39	14	13	74	7	32	56	112	24	14	8	1.88628e+08	Rrp15	FALSE	FALSE	TRUE
chr10	98820021	98820507	486	113	103	55	66	60	36	30	41	159	38	69	87	85	48	41	72	9.88203e+07	Dusp6	FALSE	FALSE	TRUE
chr10	17447309	17447758	449	95	78	29	75	110	31	22	28	85	28	54	91	111	59	30	53	1.74475e+07	Cited2	FALSE	FALSE	TRUE
chr10	26575839	26576264	425	218	148	89	123	135	135	83	114	190	118	112	115	204	126	80	116	2.65761e+07	Arhgap18	FALSE	FALSE	TRUE
chr10	19627758	19628151	393	41	34	26	59	106	50	19	37	64	8	35	72	118	50	21	35	1.9628e+07	Pex7	FALSE	FALSE	FALSE
chr10	76576541	76576926	385	76	53	73	55	43	105	63	88	40	90	51	37	36	101	46	69	7.65768e+07	Col18a1	TRUE	FALSE	FALSE
chr10	121008652	121009023	371	79	39	30	32	43	25	27	25	124	23	41	31	32	36	25	35	1.21009e+08	Tbk1	FALSE	FALSE	TRUE
chr10	100953092	100953458	366	62	24	32	103	140	63	23	54	44	6	43	102	141	68	40	54	1.00953e+08	Mgat4c	FALSE	FALSE	FALSE
chr10	106477513	106477872	359	100	66	33	77	83	44	13	40	129	29	50	73	76	39	33	37	1.06478e+08	Acss3	FALSE	FALSE	TRUE
chr10	127031533	127031889	356	38	44	71	44	54	92	73	80	48	88	58	32	59	109	68	74	1.27032e+08	Lrp1	TRUE	FALSE	FALSE
chr10	106560592	106560940	348	83	61	55	69	59	59	49	57	95	101	53	47	72	83	36	68	1.06561e+08	Acss3	FALSE	FALSE	FALSE
chr10	86514481	86514827	346	281	135	84	163	198	120	63	64	265	78	112	167	209	102	77	91	8.65147e+07	1700113H08Rik	FALSE	FALSE	TRUE
chr10	66467032	66467377	345	58	46	39	69	62	41	27	35	108	31	45	81	62	59	28	49	6.64672e+07	Reep3	FALSE	FALSE	TRUE
chr10	44768559	44768892	333	17	41	28	10	28	38	29	40	34	103	30	24	17	37	20	31	44768738	Prep	FALSE	TRUE	FALSE
chr10	94681460	94681790	330	3	97	21	8	13	21	31	12	5	142	33	12	43	47	29	15	9.46816e+07	Cradd	FALSE	TRUE	FALSE
chr10	111271383	111271709	326	104	143	70	64	87	44	63	81	155	143	92	63	86	43	62	95	1.11272e+08	Krr1	FALSE	TRUE	FALSE
chr10	80377139	80377463	324	30	66	51	19	18	58	45	71	48	138	50	28	23	127	31	59	8.03773e+07	Lmnb2	TRUE	FALSE	FALSE
chr10	121763964	121764285	321	332	139	113	241	312	145	81	100	336	46	120	186	206	145	83	102	1.21764e+08	Avpr1a	FALSE	FALSE	TRUE
chr10	59740618	59740933	315	40	44	54	41	28	48	53	83	58	198	50	36	39	189	48	65	5.97408e+07	Psap	TRUE	FALSE	FALSE
chr10	118190157	118190469	312	172	89	60	106	160	66	44	57	206	50	77	96	137	61	61	74	1.1819e+08	Dyrk2	FALSE	FALSE	TRUE
chr10	66750761	66751070	309	18	28	34	12	9	47	32	44	38	56	40	19	56	116	42	30	6.67509e+07	Nrbf2	TRUE	FALSE	FALSE
chr10	80228859	80229165	306	60	80	69	23	22	57	77	66	38	120	71	20	27	75	63	61	8.02291e+07	Dot1l	FALSE	TRUE	FALSE
chr10	12728013	12728318	305	46	32	42	40	19	73	51	50	27	123	39	26	26	91	34	48	1.27282e+07	Sf3b5	TRUE	FALSE	FALSE
chr10	40068557	40068855	298	108	82	100	48	63	51	111	93	102	118	89	63	101	78	95	86	4.00687e+07	Cdk19	FALSE	TRUE	FALSE
chr10	117540461	117540759	298	35	174	96	112	62	101	85	94	47	399	122	138	85	185	76	105	1.17541e+08	Mdm1	FALSE	TRUE	FALSE
chr10	41971106	41971402	296	33	59	47	35	31	85	47	68	30	124	48	21	60	134	57	47	4.19712e+07	Foxo3	TRUE	FALSE	FALSE
chr10	76609744	76610040	296	20	39	36	22	15	31	31	48	20	168	38	23	36	138	25	35	7.66098e+07	Col18a1	TRUE	FALSE	FALSE
chr10	84262804	84263100	296	84	105	67	166	95	51	43	70	77	124	100	169	89	66	47	95	8.42629e+07	Rfx4	FALSE	FALSE	TRUE
chr10	92574179	92574475	296	120	141	71	192	159	110	44	74	200	58	77	169	172	125	40	66	9.25743e+07	Cdk17	FALSE	FALSE	TRUE
chr10	75300233	75300524	291	43	58	64	18	13	63	65	84	43	110	49	26	48	160	52	56	7.53003e+07	Gstt2	TRUE	FALSE	FALSE
chr10	95299492	95299782	290	74	52	26	101	98	46	19	38	128	32	45	75	91	56	23	57	9.52997e+07	Eea1	FALSE	FALSE	TRUE
chr10	24668283	24668568	285	182	166	130	155	170	118	106	158	237	86	167	133	118	134	127	189	2.46684e+07	Arg1	FALSE	FALSE	FALSE
chr10	86341560	86341845	285	73	119	68	78	64	71	41	79	89	108	90	106	97	72	60	80	8.63417e+07	Stab2	FALSE	FALSE	TRUE
chr10	121886480	121886765	285	27	41	47	32	23	60	57	54	17	156	50	38	35	117	48	46	1.21887e+08	Avpr1a	TRUE	FALSE	FALSE
chr10	82787757	82788041	284	46	72	38	64	97	75	26	31	54	26	49	62	101	57	16	40	8.27879e+07	Slc41a2	FALSE	FALSE	TRUE
chr10	124758825	124759106	281	278	105	114	78	86	36	94	137	372	93	91	50	41	31	93	76	1.24759e+08	Slc16a7	FALSE	FALSE	FALSE
chr10	59406335	59406612	277	86	188	118	127	110	141	101	94	100	200	119	146	106	164	81	102	5.94065e+07	Ddit4	FALSE	TRUE	FALSE
chr10	19653591	19653867	276	17	60	40	84	18	40	39	54	6	193	45	64	19	132	46	51	1.96537e+07	Map3k5	TRUE	FALSE	FALSE
chr10	33670994	33671268	274	45	109	80	36	21	59	51	98	66	193	87	36	57	61	68	93	3.36711e+07	Zufsp	FALSE	TRUE	FALSE
chr10	29071272	29071543	271	129	95	47	51	78	33	19	28	100	24	56	52	113	33	23	28	2.90714e+07	Rnf146	FALSE	FALSE	FALSE
chr10	70696880	70697149	269	155	58	75	81	82	78	65	98	131	35	72	45	65	100	70	70	70697044	Tfam	FALSE	FALSE	FALSE
chr10	21329490	21329757	267	98	134	73	46	72	44	46	87	106	154	109	62	83	57	83	99	2.13296e+07	1700020N01Rik	FALSE	TRUE	FALSE
chr10	76713974	76714241	267	40	73	65	19	20	66	79	77	38	95	59	14	32	104	60	63	7.67141e+07	Gm10941	TRUE	FALSE	FALSE
chr10	17443232	17443498	266	30	63	41	72	23	47	41	51	45	194	41	54	17	127	40	39	1.74434e+07	Cited2	TRUE	FALSE	FALSE
chr10	127647985	127648250	265	139	262	248	121	89	127	289	268	175	539	244	117	123	305	229	201	1.27648e+08	Spryd4	TRUE	FALSE	FALSE
chr10	5152860	5153123	263	78	45	28	87	112	66	15	25	75	18	29	89	85	35	28	20	5.15295e+06	Syne1	FALSE	FALSE	TRUE
chr10	67460790	67461052	262	119	176	106	90	54	73	86	82	158	159	115	96	45	46	82	59	6.74609e+07	Rtkn2	FALSE	FALSE	TRUE
chr10	79593258	79593520	262	53	42	57	18	18	68	55	78	54	79	53	32	51	103	51	74	7.95934e+07	Dos	TRUE	FALSE	FALSE
chr10	120803079	120803340	261	150	117	54	60	71	32	35	37	175	50	83	63	56	28	44	60	120803224	Gns	FALSE	FALSE	FALSE
chr10	124927406	124927667	261	86	53	21	53	83	62	15	21	70	8	30	56	116	33	24	24	1.24928e+08	Slc16a7	FALSE	FALSE	TRUE
chr10	5607967	5608227	260	74	51	30	101	150	69	19	37	98	35	46	85	129	59	38	28	5.60808e+06	Esr1	FALSE	FALSE	TRUE
chr10	41654581	41654841	260	59	78	80	58	51	51	83	96	51	264	76	38	66	153	65	87	4.16547e+07	Armc2	FALSE	TRUE	FALSE
chr10	75344818	75345078	260	54	58	64	28	22	73	59	93	88	148	54	37	37	104	44	67	7.5345e+07	Derl3	TRUE	FALSE	FALSE
chr10	60775555	60775814	259	144	75	51	70	57	51	35	30	155	24	52	49	63	40	24	38	6.07757e+07	Prf1	FALSE	FALSE	TRUE
chr10	120423324	120423583	259	28	85	64	109	83	116	25	87	39	37	85	125	107	112	40	110	1.20423e+08	Lemd3	FALSE	FALSE	FALSE
chr10	89185030	89185287	257	261	512	298	334	225	214	293	307	292	670	290	309	205	262	216	297	8.91851e+07	Actr6	FALSE	FALSE	TRUE
chr10	126495310	126495566	256	22	44	47	25	11	44	47	50	33	155	40	21	8	81	40	30	1.26495e+08	March9	TRUE	FALSE	FALSE
chr10	89028376	89028631	255	111	142	131	86	116	73	122	128	233	194	147	75	104	83	155	122	8.90285e+07	Nr1h4	FALSE	FALSE	FALSE
chr10	98410820	98411075	255	67	72	32	84	91	85	29	24	88	31	47	86	119	60	37	22	9.84109e+07	Atp2b1	FALSE	FALSE	TRUE
chr10	59240066	59240320	254	33	120	63	53	66	59	51	62	33	128	75	54	59	49	44	69	5.92402e+07	Cbara1	FALSE	FALSE	TRUE
chr10	59247997	59248251	254	29	31	34	44	13	14	31	35	46	101	37	39	35	67	26	45	5.92482e+07	Cbara1	FALSE	TRUE	FALSE
chr10	80600292	80600546	254	79	71	51	123	15	61	71	50	52	109	48	55	22	103	55	46	8.06004e+07	Zbtb7a	TRUE	FALSE	FALSE
chr10	80876607	80876861	254	54	53	90	135	41	90	100	105	78	157	75	92	79	166	77	81	8.08768e+07	Nfic	TRUE	FALSE	FALSE
chr10	128402156	128402410	254	119	104	104	63	51	39	94	134	153	107	109	57	71	52	81	136	1.28402e+08	Mettl7b	FALSE	FALSE	FALSE
chr10	75252650	75252903	253	52	105	117	69	34	100	116	157	76	401	108	55	35	166	111	107	7.52528e+07	Gstt1	FALSE	TRUE	FALSE
chr10	114687448	114687697	249	89	156	63	111	101	57	69	53	71	156	104	96	104	57	68	74	1.14688e+08	Tbc1d15	FALSE	FALSE	TRUE
chr10	104750056	104750304	248	72	24	31	74	130	69	26	42	114	7	36	70	130	44	27	47	1.0475e+08	Tmtc2	FALSE	FALSE	TRUE
chr10	128111254	128111502	248	46	66	66	41	44	70	81	81	79	114	66	39	29	62	72	71	1.28111e+08	Suox	FALSE	TRUE	FALSE
chr10	79896624	79896871	247	65	52	46	39	42	48	57	41	104	41	55	40	64	44	46	52	7.98968e+07	Tcf3	FALSE	FALSE	FALSE
chr10	19921972	19922218	246	28	46	43	15	21	40	45	53	46	162	47	17	54	75	47	53	1.99221e+07	4930405J17Rik	TRUE	FALSE	FALSE
chr10	59231241	59231487	246	13	33	22	11	6	21	21	27	14	114	16	7	17	46	11	21	5.92313e+07	Cbara1	FALSE	TRUE	FALSE
chr10	67742988	67743234	246	75	48	33	94	85	51	29	36	104	24	46	97	86	53	44	40	6.77431e+07	Arid5b	FALSE	FALSE	TRUE
chr10	19597164	19597408	244	90	88	59	98	62	66	62	61	54	93	71	64	74	111	58	69	1.95973e+07	Pex7	TRUE	FALSE	FALSE
chr10	21130617	21130861	244	75	43	39	112	91	43	21	43	78	33	47	92	82	49	37	43	2.11307e+07	Aldh8a1	FALSE	FALSE	TRUE
chr10	22563043	22563287	244	41	49	71	33	28	56	82	87	40	70	66	27	48	108	82	81	2.25631e+07	Tcf21	TRUE	FALSE	FALSE
chr10	21161598	21161841	243	51	44	48	83	156	135	32	50	140	10	46	109	194	61	30	61	2.11617e+07	Aldh8a1	FALSE	FALSE	FALSE
chr10	43232847	43233090	243	199	139	119	46	38	108	134	136	138	280	120	53	71	118	109	125	4.32329e+07	Bend3	FALSE	TRUE	FALSE
chr10	86981451	86981694	243	98	42	49	53	54	44	41	65	132	39	48	46	73	40	40	63	8.69815e+07	Pah	FALSE	FALSE	TRUE
chr10	102226443	102226686	243	56	148	61	77	104	58	31	40	20	44	97	108	79	47	44	34	1.02227e+08	Rassf9	FALSE	FALSE	TRUE
chr10	62620966	62621208	242	79	125	92	187	147	67	104	88	56	194	116	130	147	134	108	113	6.26211e+07	Mypn	FALSE	TRUE	FALSE
chr10	121060813	121061055	242	21	31	33	10	17	16	29	43	23	124	38	15	13	23	37	43	1.21061e+08	Xpot	FALSE	TRUE	FALSE
chr10	17440677	17440918	241	84	39	24	31	39	24	11	14	137	2	32	28	27	11	13	9	17440823	Cited2	FALSE	FALSE	TRUE
chr10	69388012	69388253	241	46	30	54	16	27	50	51	75	61	101	48	23	36	51	56	54	6.93881e+07	Ank3	TRUE	FALSE	FALSE
chr10	80165159	80165400	241	41	38	52	53	33	57	74	56	59	133	49	50	53	116	49	57	8.01653e+07	Izumo4	TRUE	FALSE	FALSE
chr10	87320403	87320644	241	91	87	51	86	91	48	35	48	123	62	67	86	76	58	36	67	8.73205e+07	Igf1	FALSE	FALSE	TRUE
chr10	41985176	41985416	240	66	63	31	73	27	19	31	21	106	57	46	50	41	46	31	57	4.19853e+07	Foxo3	FALSE	FALSE	TRUE
chr10	74583805	74584045	240	51	75	124	58	50	126	135	154	74	265	111	51	90	234	119	126	7.45839e+07	Bcr	TRUE	FALSE	FALSE
chr10	98695242	98695482	240	69	68	29	46	70	25	17	29	105	24	35	57	57	39	15	26	9.86954e+07	Dusp6	FALSE	FALSE	TRUE
chr10	127374205	127374445	240	167	65	66	244	206	139	59	80	214	21	90	183	180	144	61	105	1.27374e+08	Sdr9c7	FALSE	FALSE	TRUE
chr10	33859724	33859963	239	105	66	170	29	38	177	205	209	127	126	139	23	61	216	177	153	3.38598e+07	Fam26f	TRUE	FALSE	FALSE
chr10	37260587	37260826	239	74	36	21	51	96	44	14	20	115	9	24	42	96	33	17	12	3.72607e+07	Marcks	FALSE	FALSE	TRUE
chr10	39744993	39745232	239	17	54	41	26	14	58	51	40	42	113	36	32	22	96	35	36	3.97451e+07	AI317395	TRUE	FALSE	FALSE
chr10	86386414	86386653	239	168	116	90	189	93	75	72	54	191	44	106	147	138	88	68	64	8.63865e+07	Stab2	FALSE	FALSE	TRUE
chr10	107480747	107480986	239	86	41	60	43	73	51	58	64	101	47	63	34	77	41	54	80	107480857	Ppp1r12a	FALSE	FALSE	FALSE
chr10	126844453	126844691	238	127	114	157	89	123	97	170	175	146	354	133	70	133	61	149	135	1.26845e+08	R3hdm2	FALSE	TRUE	FALSE
chr10	127396370	127396608	238	141	73	118	51	50	63	126	160	149	176	98	42	37	57	107	127	127396471	Hsd17b6	FALSE	TRUE	FALSE
chr10	74515796	74516033	237	54	66	79	53	46	75	69	118	37	199	101	72	70	147	67	129	7.45159e+07	Rab36	TRUE	FALSE	FALSE
chr10	39379838	39380074	236	75	27	59	40	43	101	69	55	78	33	55	31	58	109	62	45	3.93799e+07	E130307A14Rik	TRUE	FALSE	FALSE
chr10	85749328	85749564	236	107	138	131	86	76	48	111	136	129	209	154	73	75	62	148	135	8.57495e+07	Syn3	FALSE	TRUE	FALSE
chr10	92978736	92978972	236	103	100	61	73	75	53	31	65	50	45	69	64	83	54	30	70	9.29789e+07	Hal	FALSE	FALSE	FALSE
chr10	94605828	94606064	236	24	191	83	23	39	63	106	61	50	377	83	49	60	83	80	51	9.4606e+07	Cradd	FALSE	TRUE	FALSE
chr10	41347190	41347425	235	177	120	97	144	163	134	77	101	205	92	107	127	196	142	83	120	4.13473e+07	Ccdc162	FALSE	FALSE	TRUE
chr10	68076727	68076962	235	43	63	74	62	56	65	103	79	18	129	78	37	71	154	91	76	6.80769e+07	1700040L02Rik	TRUE	FALSE	FALSE
chr10	79721930	79722165	235	20	28	51	18	25	29	68	55	22	117	42	19	35	141	61	34	7.9722e+07	Gamt	TRUE	FALSE	FALSE
chr10	21014245	21014479	234	308	189	118	176	120	71	91	114	301	92	165	176	143	131	105	140	2.10142e+07	Hbs1l	FALSE	FALSE	FALSE
chr10	21398609	21398843	234	42	85	59	18	21	51	46	80	26	193	46	24	35	52	33	61	2.13987e+07	1700020N01Rik	FALSE	TRUE	FALSE
chr10	76903539	76903773	234	33	72	19	28	21	20	15	28	62	126	34	18	25	22	33	25	7.69037e+07	Gm17769	FALSE	TRUE	FALSE
chr10	78560282	78560516	234	62	63	65	68	35	60	94	65	81	118	50	50	34	74	53	45	7.85604e+07	2610008E11Rik	FALSE	TRUE	FALSE
chr10	5608235	5608468	233	87	55	25	65	56	22	16	19	101	17	45	77	76	34	21	17	5.6083e+06	Esr1	FALSE	FALSE	TRUE
chr10	67907142	67907374	232	308	264	86	101	128	47	51	61	353	65	126	85	128	37	57	82	6.79073e+07	1700040L02Rik	FALSE	FALSE	FALSE
chr10	86495541	86495773	232	184	187	97	194	233	116	58	87	185	134	144	185	239	115	71	108	8.64956e+07	Stab2	FALSE	FALSE	TRUE
chr10	91609031	91609263	232	194	122	55	34	72	48	43	60	156	51	82	26	76	23	38	72	9.16092e+07	Rmst	FALSE	FALSE	TRUE
chr10	94780615	94780847	232	4	40	14	4	4	6	21	14	1	107	15	7	4	28	9	19	9.47807e+07	Cradd	FALSE	TRUE	FALSE
chr10	121059493	121059725	232	211	183	71	68	126	77	23	35	211	38	88	98	142	45	24	36	1.2106e+08	Xpot	FALSE	FALSE	FALSE
chr10	123280847	123281079	232	92	39	28	52	108	52	21	28	110	14	43	59	100	42	27	37	1.23281e+08	Fam19a2	FALSE	FALSE	TRUE
chr10	33926273	33926504	231	27	34	45	116	48	67	59	45	31	89	58	75	43	134	81	51	33926425	Dse	TRUE	FALSE	FALSE
chr10	82773318	82773549	231	47	68	37	106	92	50	21	56	97	66	67	95	153	84	39	74	8.27734e+07	Slc41a2	FALSE	FALSE	TRUE
chr10	92951258	92951488	230	463	451	287	306	259	156	258	289	395	462	344	318	249	214	260	343	9.29514e+07	Hal	FALSE	FALSE	FALSE
chr10	126726345	126726575	230	72	84	111	61	37	103	155	108	69	279	104	66	48	188	112	87	1.26726e+08	Mbd6	TRUE	FALSE	FALSE
chr10	5724724	5724953	229	13	56	32	14	8	40	41	34	34	122	30	26	17	76	30	41	5.72485e+06	Esr1	TRUE	FALSE	FALSE
chr10	38853620	38853849	229	18	41	48	48	30	48	66	47	14	115	41	48	28	120	41	42	3.88538e+07	Tube1	TRUE	FALSE	FALSE
chr10	57252262	57252491	229	15	36	25	49	13	46	27	32	6	119	33	69	38	99	37	28	5.72524e+07	Serinc1	TRUE	FALSE	FALSE
chr10	59454074	59454303	229	19	90	45	24	25	26	51	54	20	166	66	24	16	22	49	62	5.94542e+07	Anapc16	FALSE	TRUE	FALSE
chr10	77088879	77089108	229	83	112	80	87	74	108	83	100	60	116	89	62	80	110	81	80	7.7089e+07	Ube2g2	TRUE	FALSE	FALSE
chr10	94992096	94992325	229	53	112	30	38	75	22	13	15	39	28	51	38	68	26	25	17	94992218	Ube2n	FALSE	FALSE	TRUE
chr10	68567426	68567654	228	14	68	25	9	17	9	17	27	13	177	28	17	5	22	15	24	6.85675e+07	Rhobtb1	FALSE	TRUE	FALSE
chr10	108147624	108147852	228	179	95	72	184	144	60	33	79	204	51	75	175	174	95	50	82	1.08148e+08	Syt1	FALSE	FALSE	TRUE
chr10	127805314	127805542	228	38	90	52	51	34	58	45	73	46	310	76	63	33	190	68	72	1.27805e+08	Coq10a	TRUE	FALSE	FALSE
chr10	43209359	43209586	227	19	36	85	66	23	32	110	74	35	90	89	58	16	44	92	64	4.32094e+07	Bend3	FALSE	TRUE	FALSE
chr10	95304083	95304310	227	138	66	54	117	101	44	36	51	148	58	72	109	93	97	46	75	9.53042e+07	Eea1	FALSE	FALSE	TRUE
chr10	21721522	21721748	226	79	119	57	87	87	37	69	55	129	127	80	63	107	67	58	76	2.17216e+07	Sgk1	FALSE	FALSE	TRUE
chr10	80082362	80082588	226	73	71	47	52	37	31	41	50	136	54	67	40	26	30	57	64	8.00825e+07	Csnk1g2	FALSE	FALSE	FALSE
chr10	80555250	80555476	226	31	61	63	51	25	88	79	83	30	199	74	44	53	187	83	61	8.05554e+07	Creb3l3	TRUE	FALSE	FALSE
chr10	126342742	126342968	226	73	100	73	47	21	31	69	97	88	187	73	46	40	53	54	80	1.26343e+08	Xrcc6bp1	FALSE	TRUE	FALSE
chr10	53656036	53656261	225	158	157	99	55	50	75	89	101	115	85	114	60	68	70	74	112	5.36561e+07	Man1a	FALSE	FALSE	FALSE
chr10	62040523	62040748	225	42	78	77	66	35	78	102	77	14	229	81	59	19	134	92	61	6.20406e+07	2510003E04Rik	TRUE	FALSE	FALSE
chr10	79316853	79317078	225	20	35	41	9	9	13	43	54	28	113	30	13	25	46	27	34	7.9317e+07	Ptbp1	FALSE	TRUE	FALSE
chr10	79795337	79795562	225	48	92	61	64	68	30	53	62	47	142	81	88	84	82	53	95	7.97955e+07	Reep6	FALSE	TRUE	FALSE
chr10	82996045	82996270	225	59	89	74	37	26	64	77	70	48	179	72	34	50	74	76	64	82996149	Aldh1l2	FALSE	TRUE	FALSE
chr10	92980556	92980781	225	232	174	123	125	172	93	86	90	265	99	136	135	180	91	99	128	9.29807e+07	Amdhd1	FALSE	FALSE	TRUE
chr10	52834958	52835182	224	90	79	25	41	62	20	8	14	156	34	50	44	65	19	18	36	52835072	Gm19395	FALSE	FALSE	TRUE
chr10	57909372	57909596	224	64	90	85	151	49	115	101	93	48	235	77	114	59	194	61	89	5.79095e+07	Ranbp2	TRUE	FALSE	FALSE
chr10	58759147	58759371	224	16	22	27	13	15	19	21	40	27	115	27	15	8	31	26	22	5.87593e+07	P4ha1	FALSE	TRUE	FALSE
chr10	76621869	76622093	224	82	116	101	52	53	53	94	107	46	170	92	40	43	60	77	103	7.6622e+07	Col18a1	FALSE	TRUE	FALSE
chr10	86241387	86241610	223	87	75	57	93	35	51	58	68	81	156	60	73	46	136	49	64	8.62415e+07	Nt5dc3	FALSE	TRUE	FALSE
chr10	8512232	8512454	222	53	37	26	73	91	35	17	22	47	13	38	101	146	43	25	28	8.5123e+06	Sash1	FALSE	FALSE	FALSE
chr10	45266745	45266967	222	122	53	49	69	74	48	33	43	117	11	65	48	63	40	30	56	45266834	Hace1	FALSE	FALSE	TRUE
chr10	67737201	67737423	222	39	102	40	37	42	30	21	29	33	83	61	46	41	38	20	53	6.77373e+07	Arid5b	FALSE	TRUE	FALSE
chr10	124812608	124812830	222	161	73	61	116	177	85	49	60	155	12	66	103	189	67	34	66	1.24813e+08	Slc16a7	FALSE	FALSE	TRUE
chr10	128024790	128025012	222	85	124	135	72	78	113	168	169	93	184	136	76	88	236	137	147	1.28025e+08	Erbb3	TRUE	FALSE	FALSE
chr10	21325102	21325323	221	72	85	80	65	99	80	99	92	59	63	88	43	93	113	74	101	2.13252e+07	1700020N01Rik	FALSE	FALSE	FALSE
chr10	28142486	28142707	221	113	56	24	39	53	34	17	14	139	17	38	34	69	23	17	15	2.81426e+07	Ptprk	FALSE	FALSE	TRUE
chr10	52081115	52081336	221	79	80	66	75	111	63	49	80	107	124	90	78	85	45	77	100	5.20812e+07	Gopc	FALSE	TRUE	FALSE
chr10	58757910	58758130	220	63	171	202	134	70	120	246	209	49	505	175	147	83	325	157	126	5.8758e+07	P4ha1	TRUE	FALSE	FALSE
chr10	98903745	98903965	220	125	195	131	135	102	66	142	132	154	216	180	130	107	75	154	187	9.89039e+07	Gm20110	FALSE	TRUE	FALSE
chr10	6372679	6372898	219	85	134	110	263	62	128	144	117	116	412	138	175	74	354	148	168	6.37277e+06	Mthfd1l	TRUE	FALSE	FALSE
chr10	76552367	76552586	219	52	86	66	37	22	63	76	75	62	253	65	31	38	171	64	69	76552453	Col18a1	TRUE	FALSE	FALSE
chr10	77157323	77157542	219	28	44	53	13	17	31	73	59	14	90	40	17	31	104	38	45	7.71574e+07	Gm19402	TRUE	FALSE	FALSE
chr10	92999286	92999505	219	112	127	102	55	46	58	75	118	108	182	113	43	64	51	103	119	9.29994e+07	Amdhd1	FALSE	TRUE	FALSE
chr10	118186896	118187115	219	165	159	98	125	107	57	69	118	112	205	146	120	154	97	101	160	1.18187e+08	Dyrk2	FALSE	TRUE	FALSE
chr10	120352400	120352619	219	24	43	29	17	11	13	25	32	13	104	30	13	12	16	26	23	1.20352e+08	Msrb3	FALSE	TRUE	FALSE
chr10	12588654	12588872	218	89	95	88	110	31	104	92	118	112	199	84	85	32	94	95	82	1.25888e+07	Utrn	FALSE	TRUE	FALSE
chr10	74522915	74523133	218	66	89	139	71	42	114	174	153	43	234	105	69	106	260	121	103	74523031	Bcr	TRUE	FALSE	FALSE
chr10	75243528	75243746	218	16	28	25	36	10	27	31	31	14	102	33	19	25	70	23	45	7.52437e+07	Gstt3	TRUE	FALSE	FALSE
chr10	76554360	76554578	218	222	137	106	134	125	58	111	115	196	67	128	110	105	70	99	137	7.65545e+07	Col18a1	FALSE	FALSE	FALSE
chr10	87819833	87820051	218	56	90	67	213	24	92	84	75	55	285	91	105	43	196	116	91	8.78199e+07	Dram1	TRUE	FALSE	FALSE
chr10	90120474	90120692	218	234	188	102	181	155	92	54	66	334	52	104	149	118	74	46	66	9.01207e+07	Anks1b	FALSE	FALSE	TRUE
chr10	93861070	93861288	218	38	65	67	40	29	25	55	88	75	138	62	59	42	96	47	79	9.38612e+07	Gm4792	TRUE	FALSE	FALSE
chr10	8593585	8593802	217	207	151	85	174	250	82	59	87	228	56	116	172	281	118	68	99	8.59366e+06	Sash1	FALSE	FALSE	TRUE
chr10	32131175	32131392	217	43	23	22	54	95	53	14	33	57	10	24	40	114	29	17	19	3.21313e+07	Nkain2	FALSE	FALSE	TRUE
chr10	67742195	67742412	217	55	41	30	87	126	73	29	35	64	19	38	59	156	73	33	50	6.77423e+07	Arid5b	FALSE	FALSE	FALSE
chr10	77804872	77805089	217	45	125	77	71	42	56	73	64	36	76	92	60	56	45	62	64	7.7805e+07	Agpat3	FALSE	TRUE	FALSE
chr10	87035311	87035528	217	128	83	55	107	155	75	44	43	131	11	69	121	135	83	42	51	87035424	Pah	FALSE	FALSE	TRUE
chr10	16356847	16357063	216	159	88	46	79	62	34	39	34	167	60	71	68	53	39	37	71	1.6357e+07	Gm20125	FALSE	FALSE	FALSE
chr10	67559239	67559455	216	19	47	49	31	12	38	73	46	42	105	42	18	20	35	68	30	6.75593e+07	Arid5b	FALSE	TRUE	FALSE
chr10	117166442	117166658	216	43	47	100	39	47	63	95	121	61	114	121	44	72	76	128	99	117166544	Slc35e3	FALSE	FALSE	FALSE
chr10	117282181	117282397	216	19	31	18	22	6	22	20	22	30	110	24	27	12	59	23	26	1.17282e+08	Rap1b	TRUE	FALSE	FALSE
chr10	62836309	62836524	215	109	109	132	66	49	68	139	148	109	154	107	29	31	97	134	93	6.28364e+07	Dnajc12	FALSE	TRUE	FALSE
chr10	86167441	86167656	215	79	103	82	36	56	124	83	131	106	124	68	44	53	163	64	97	8.61675e+07	Hsp90b1	TRUE	FALSE	FALSE
chr10	120849170	120849385	215	67	44	48	41	56	38	43	55	124	22	44	43	63	54	36	55	1.20849e+08	Rassf3	FALSE	FALSE	TRUE
chr10	84507017	84507231	214	158	260	274	201	193	262	301	364	163	631	295	176	171	347	262	328	8.45071e+07	Fhl4	FALSE	TRUE	FALSE
chr10	86797967	86798181	214	63	36	22	62	90	61	14	35	125	17	36	77	135	33	19	29	8.67981e+07	Ascl1	FALSE	FALSE	TRUE
chr10	87319258	87319472	214	38	126	85	59	51	49	94	92	28	344	119	60	56	72	103	99	8.73194e+07	Igf1	FALSE	TRUE	FALSE
chr10	88921610	88921824	214	197	109	103	130	195	103	85	88	250	37	126	123	174	95	95	103	8.89217e+07	Nr1h4	FALSE	FALSE	TRUE
chr10	23612780	23612993	213	126	105	49	116	173	78	23	41	157	23	71	147	179	47	30	33	2.3613e+07	Vnn1	FALSE	FALSE	TRUE
chr10	39345780	39345993	213	106	70	119	42	83	138	132	151	33	175	89	40	68	165	96	119	3.93459e+07	Traf3ip2	TRUE	FALSE	FALSE
chr10	61949972	61950185	213	92	89	116	53	67	100	130	123	88	145	107	62	65	140	109	118	6.19501e+07	Vps26a	TRUE	FALSE	FALSE
chr10	80602742	80602955	213	33	34	67	44	28	71	76	68	28	127	62	42	38	132	64	66	8.06029e+07	Zbtb7a	TRUE	FALSE	FALSE
chr10	120937153	120937366	213	129	108	66	80	92	42	35	57	132	62	102	87	93	56	61	104	1.20937e+08	Rassf3	FALSE	FALSE	FALSE
chr10	25115380	25115592	212	109	106	51	108	122	58	34	60	107	58	77	66	131	47	45	65	2.51155e+07	Epb4.1l2	FALSE	FALSE	TRUE
chr10	70805932	70806144	212	117	67	54	116	202	100	37	71	187	16	64	144	216	95	41	65	7.08061e+07	Cisd1	FALSE	FALSE	TRUE
chr10	82565098	82565310	212	12	46	66	15	27	39	87	71	33	115	59	16	23	26	73	55	82565180	Chst11	FALSE	TRUE	FALSE
chr10	88247417	88247629	212	149	73	37	65	112	73	15	35	177	18	40	63	136	36	17	24	8.82475e+07	Utp20	FALSE	FALSE	TRUE
chr10	96153957	96154169	212	62	28	37	95	103	51	40	45	71	13	39	88	106	43	40	42	9.61541e+07	Btg1	FALSE	FALSE	FALSE
chr10	7807171	7807382	211	90	55	67	157	150	88	72	61	92	81	63	101	119	99	61	54	7.8072e+06	Tab2	FALSE	FALSE	TRUE
chr10	21168918	21169129	211	277	252	120	228	358	191	77	97	278	68	149	333	455	159	101	101	2.1169e+07	Aldh8a1	FALSE	FALSE	TRUE
chr10	80425580	80425791	211	183	205	110	62	68	68	98	110	235	104	127	83	97	44	103	133	8.04256e+07	Gng7	FALSE	FALSE	TRUE
chr10	80603686	80603897	211	11	33	28	29	9	40	44	31	20	108	30	18	18	128	38	28	8.06038e+07	Zbtb7a	TRUE	FALSE	FALSE
chr10	95693010	95693221	211	123	102	133	91	105	60	146	139	134	139	143	73	112	65	125	154	9.56931e+07	Eea1	FALSE	TRUE	FALSE
chr10	39726885	39727095	210	55	63	59	21	24	80	60	68	37	136	66	28	39	169	60	63	3.9727e+07	AI317395	TRUE	FALSE	FALSE
chr10	79421052	79421262	210	19	44	45	46	32	33	45	66	14	147	42	45	43	170	44	42	7.94212e+07	Wdr18	TRUE	FALSE	FALSE
chr10	17127731	17127940	209	75	21	50	239	195	139	51	75	71	19	62	214	234	96	63	47	1.71278e+07	Gm20125	FALSE	FALSE	FALSE
chr10	77920660	77920869	209	47	47	56	48	23	43	69	68	50	177	69	49	23	163	76	82	7.79207e+07	Pdxk	TRUE	FALSE	FALSE
chr10	80763057	80763266	209	14	19	43	13	30	58	47	57	55	95	52	35	50	140	39	59	8.07632e+07	Pip5k1c	TRUE	FALSE	FALSE
chr10	85379855	85380064	209	23	62	43	34	22	52	35	61	29	165	42	34	20	84	36	43	8.53799e+07	Prdm4	FALSE	TRUE	FALSE
chr10	126604968	126605177	209	121	149	135	107	81	139	132	164	148	279	135	104	113	161	143	139	1.26605e+08	B4galnt1	TRUE	FALSE	FALSE
chr10	127008299	127008508	209	23	123	89	50	42	101	104	127	19	199	103	53	62	198	96	127	1.27008e+08	Lrp1	TRUE	FALSE	FALSE
chr10	127780547	127780756	209	77	43	37	150	69	48	23	34	87	39	38	73	100	56	30	37	1.27781e+08	Cs	FALSE	FALSE	TRUE
chr10	10168946	10169154	208	436	318	178	465	500	224	126	190	576	146	246	486	564	261	161	147	1.01691e+07	Rab32	FALSE	FALSE	TRUE
chr10	41988090	41988298	208	51	90	76	29	40	92	47	134	48	183	77	36	69	108	64	120	4.19882e+07	Foxo3	TRUE	FALSE	FALSE
chr10	58901356	58901564	208	12	34	46	14	11	35	70	45	7	128	38	13	12	106	51	27	5.89014e+07	Oit3	TRUE	FALSE	FALSE
chr10	75116914	75117122	208	36	42	85	48	17	19	63	99	56	151	71	42	32	55	55	77	7.5117e+07	Cabin1	FALSE	TRUE	FALSE
chr10	87967358	87967566	208	98	76	24	74	103	44	20	21	65	40	47	67	79	42	24	31	8.79675e+07	Chpt1	FALSE	FALSE	TRUE
chr10	116873858	116874066	208	70	58	69	147	60	49	81	42	71	64	71	128	68	72	74	61	1.16874e+08	Cpsf6	TRUE	FALSE	FALSE
chr10	118137289	118137497	208	260	304	419	195	218	154	493	470	365	495	329	160	172	173	338	325	1.18137e+08	Dyrk2	FALSE	TRUE	FALSE
chr10	17954479	17954686	207	34	60	84	19	35	73	95	103	47	208	82	43	48	204	84	86	1.79546e+07	Ccdc28a	TRUE	FALSE	FALSE
chr10	95302622	95302829	207	81	114	40	48	50	48	17	26	89	44	63	62	84	59	27	37	9.53027e+07	Eea1	FALSE	FALSE	FALSE
chr10	120566386	120566593	207	307	189	238	188	131	123	265	260	247	188	231	165	109	104	227	206	1.20567e+08	Wif1	FALSE	FALSE	FALSE
chr10	107359911	107360117	206	43	45	25	95	98	84	25	27	40	29	35	124	111	49	30	30	1.0736e+08	Otogl	FALSE	FALSE	FALSE
chr10	107805467	107805673	206	124	108	80	97	64	24	63	101	115	113	104	82	70	88	104	123	1.07806e+08	Pawr	FALSE	FALSE	FALSE
chr10	41994013	41994218	205	149	188	169	133	148	146	135	211	88	247	136	149	113	170	105	157	4.19941e+07	Foxo3	TRUE	FALSE	FALSE
chr10	79739087	79739292	205	149	199	235	337	287	244	257	284	132	629	219	226	250	430	236	274	7.97392e+07	Dazap1	TRUE	FALSE	FALSE
chr10	29082472	29082676	204	35	22	25	51	81	119	15	32	38	9	30	87	88	56	15	28	2.90825e+07	Rnf146	FALSE	FALSE	FALSE
chr10	45572648	45572852	204	101	63	46	84	142	75	15	68	99	29	54	80	153	69	28	65	4.55728e+07	D030045P18Rik	FALSE	FALSE	TRUE
chr10	68681927	68682131	204	61	71	46	143	112	54	41	50	102	51	57	92	93	60	38	84	6.8682e+07	Rhobtb1	FALSE	FALSE	TRUE
chr10	82258207	82258411	204	32	112	100	86	51	76	130	92	47	360	113	105	103	201	111	106	8.22583e+07	1700028I16Rik	TRUE	FALSE	FALSE
chr10	126929148	126929352	204	94	219	89	160	178	78	47	85	98	186	162	182	181	111	67	148	1.26929e+08	R3hdm2	FALSE	FALSE	TRUE
chr10	128417712	128417916	204	18	71	44	26	12	51	55	48	11	292	60	40	38	84	26	49	1.28418e+08	Olfr9	TRUE	FALSE	FALSE
chr10	43726111	43726314	203	61	149	87	35	46	57	71	110	81	139	103	51	50	56	59	103	4.37262e+07	Aim1	FALSE	TRUE	FALSE
chr10	70830992	70831195	203	57	42	59	28	46	84	59	81	24	141	54	38	43	119	64	58	7.08311e+07	Ipmk	TRUE	FALSE	FALSE
chr10	84646941	84647144	203	28	71	69	54	28	76	61	97	29	175	64	46	59	192	72	64	8.4647e+07	Cry1	TRUE	FALSE	FALSE
chr10	107797097	107797300	203	34	194	111	83	47	40	124	103	60	459	125	90	59	78	91	74	107797191	Pawr	FALSE	TRUE	FALSE
chr10	122560066	122560269	203	92	36	22	37	56	31	15	27	122	13	26	18	74	16	12	19	1.2256e+08	Usp15	FALSE	FALSE	TRUE
chr10	13704142	13704344	202	145	159	59	224	103	53	40	60	192	125	90	233	107	121	75	63	1.37042e+07	Hivep2	FALSE	FALSE	TRUE
chr10	60551911	60552113	202	23	56	48	50	27	48	51	51	44	124	39	63	22	134	41	37	6.0552e+07	Pcbd1	TRUE	FALSE	FALSE
chr10	95412892	95413094	202	46	22	17	105	89	44	18	19	66	18	38	70	105	40	40	29	9.5413e+07	Eea1	FALSE	FALSE	FALSE
chr10	118276490	118276692	202	120	41	40	28	30	26	37	38	40	47	38	40	48	39	32	38	1.18277e+08	Dyrk2	FALSE	FALSE	FALSE
chr10	19184296	19184497	201	90	31	37	54	107	70	24	34	89	6	34	63	90	45	24	19	1.91844e+07	Olig3	FALSE	FALSE	TRUE
chr10	20033881	20034082	201	44	12	26	125	131	80	28	33	25	15	31	85	106	46	33	32	2.00339e+07	Bclaf1	FALSE	FALSE	FALSE
chr10	59715431	59715632	201	117	203	147	74	75	131	106	190	81	405	154	86	65	147	98	173	5.97155e+07	Psap	FALSE	TRUE	FALSE
chr10	79814798	79814999	201	39	46	57	35	27	88	55	70	60	150	63	45	40	125	59	76	7.98149e+07	Adamtsl5	TRUE	FALSE	FALSE
chr10	93634254	93634455	201	94	66	27	50	82	44	9	23	145	23	32	58	104	30	13	17	9.36343e+07	Nr2c1	FALSE	FALSE	TRUE
chr10	94785071	94785272	201	104	97	153	65	86	108	189	178	62	215	136	70	80	223	151	150	9.47851e+07	Cradd	TRUE	FALSE	FALSE
chr10	98924436	98924637	201	46	80	27	47	20	19	9	40	75	116	37	49	13	48	29	34	9.89245e+07	Gm20110	FALSE	TRUE	FALSE
chr10	7383908	7384108	200	60	66	50	120	117	72	27	54	60	54	64	163	130	106	38	42	7.38404e+06	Pcmt1	FALSE	FALSE	TRUE
chr10	19765958	19766158	200	133	92	53	100	125	94	30	59	209	32	65	148	139	78	44	52	1.97661e+07	Map3k5	FALSE	FALSE	TRUE
chr10	41308488	41308688	200	106	39	38	103	176	91	31	44	136	17	45	106	191	54	31	44	4.13086e+07	Ccdc162	FALSE	FALSE	TRUE
chr10	79602193	79602393	200	36	38	31	15	11	30	47	35	19	107	26	16	23	103	32	26	7.96023e+07	Dos	TRUE	FALSE	FALSE
chr10	120923570	120923770	200	202	171	150	101	141	90	127	191	228	97	177	149	198	118	165	182	1.20924e+08	Rassf3	FALSE	FALSE	FALSE
chr10	124722456	124722656	200	68	102	64	102	82	30	77	61	61	81	84	66	88	72	79	84	1.24723e+08	Slc16a7	FALSE	FALSE	TRUE
chr10	127009464	127009664	200	1	19	33	5	13	50	21	63	14	63	34	10	21	127	31	50	1.2701e+08	Lrp1	TRUE	FALSE	FALSE
chr10	19884711	19884910	199	63	80	57	129	135	38	59	49	95	67	72	121	97	60	47	59	1.98848e+07	Mtap7	FALSE	FALSE	TRUE
chr10	25291672	25291871	199	48	13	24	85	97	49	18	38	88	10	33	73	118	56	24	41	2.52917e+07	2010003K15Rik	FALSE	FALSE	TRUE
chr10	77771250	77771449	199	12	41	21	13	5	21	23	20	0	121	22	29	16	31	24	10	7.77713e+07	Agpat3	FALSE	TRUE	FALSE
chr10	80477812	80478011	199	113	124	70	64	41	102	77	70	117	132	64	56	57	128	56	58	8.04779e+07	Gng7	FALSE	TRUE	FALSE
chr10	82501049	82501248	199	23	38	32	21	8	34	41	35	6	124	31	30	13	34	28	32	8.25011e+07	Chst11	FALSE	TRUE	FALSE
chr10	84652787	84652986	199	238	170	115	355	435	183	98	111	285	73	120	276	443	166	92	118	8.46529e+07	Cry1	FALSE	FALSE	TRUE
chr10	94823842	94824041	199	69	88	50	109	70	52	28	30	83	86	54	74	65	56	34	43	9.4824e+07	2310039L15Rik	FALSE	FALSE	TRUE
chr10	3227930	3228128	198	96	99	97	71	49	62	91	113	102	201	116	61	79	71	96	124	3.22803e+06	Cnksr3	FALSE	TRUE	FALSE
chr10	60140193	60140391	198	49	188	65	65	70	48	38	60	47	151	102	63	62	108	45	64	6.01403e+07	Cdh23	FALSE	TRUE	FALSE
chr10	79340594	79340792	198	58	132	191	156	63	182	235	183	22	227	137	128	86	246	170	139	7.93407e+07	Prtn3	TRUE	FALSE	FALSE
chr10	79549710	79549908	198	9	44	22	35	19	19	27	27	8	136	23	18	12	51	19	21	7.95498e+07	Sbno2	FALSE	TRUE	FALSE
chr10	126519735	126519933	198	95	94	76	141	87	49	83	68	84	82	100	82	65	95	93	97	1.2652e+08	Agap2	FALSE	FALSE	TRUE
chr10	33507464	33507661	197	19	12	18	111	138	87	15	27	25	21	27	141	142	69	20	26	3.35076e+07	Gm4794	FALSE	FALSE	FALSE
chr10	39789185	39789381	196	96	119	71	117	70	57	46	76	99	142	98	117	82	53	68	105	3.97893e+07	Slc16a10	FALSE	FALSE	TRUE
chr10	79533804	79534000	196	31	57	80	49	35	65	79	118	82	249	70	52	48	128	65	90	7.95339e+07	Sbno2	FALSE	TRUE	FALSE
chr10	87848508	87848704	196	85	85	70	130	99	51	76	86	135	82	83	110	128	112	83	76	8.78486e+07	Gnptab	FALSE	FALSE	TRUE
chr10	124708588	124708784	196	35	68	43	24	24	17	35	51	26	169	42	37	21	24	32	29	1.24709e+08	Slc16a7	FALSE	TRUE	FALSE
chr10	19887322	19887517	195	120	90	60	228	159	60	65	52	108	51	88	168	128	81	87	72	1.98875e+07	Mtap7	FALSE	FALSE	TRUE
chr10	40219735	40219930	195	81	121	151	50	56	120	127	227	78	288	133	54	77	151	120	148	4.02198e+07	Slc22a16	TRUE	FALSE	FALSE
chr10	76869478	76869673	195	112	78	35	84	109	67	19	30	235	25	47	79	137	44	21	43	7.68695e+07	Adarb1	FALSE	FALSE	TRUE
chr10	79616611	79616806	195	32	46	38	49	18	41	37	44	7	142	40	42	20	138	35	32	7.96166e+07	Midn	TRUE	FALSE	FALSE
chr10	80730837	80731032	195	183	269	254	243	172	234	294	304	198	547	253	245	249	367	234	286	8.07309e+07	Apba3	FALSE	TRUE	FALSE
chr10	82221771	82221966	195	198	149	114	333	327	146	91	121	216	114	140	232	258	168	84	141	8.22218e+07	Nfyb	FALSE	FALSE	TRUE
chr10	82561809	82562004	195	238	176	184	171	180	210	199	197	244	177	196	181	231	206	199	200	8.25619e+07	Chst11	FALSE	FALSE	FALSE
chr10	93408647	93408842	195	111	137	69	107	92	68	64	67	68	78	106	103	89	68	69	89	93408773	Mir331	FALSE	FALSE	TRUE
chr10	20032843	20033037	194	17	29	17	11	13	14	17	26	1	110	20	15	9	41	18	17	2.00329e+07	Bclaf1	TRUE	FALSE	FALSE
chr10	62387025	62387219	194	77	58	75	33	83	63	79	84	108	73	67	45	115	106	63	74	6.23871e+07	Slc25a16	FALSE	FALSE	FALSE
chr10	66568564	66568758	194	39	85	56	36	26	71	59	72	45	199	63	33	13	74	69	59	6.65687e+07	Reep3	FALSE	TRUE	FALSE
chr10	79727555	79727749	194	6	32	22	55	7	19	33	22	8	145	30	55	10	108	23	39	7.97276e+07	Dazap1	TRUE	FALSE	FALSE
chr10	83879540	83879734	194	20	36	56	26	19	44	70	64	6	120	49	23	32	114	49	51	8.38796e+07	Nuak1	TRUE	FALSE	FALSE
chr10	99066912	99067106	194	45	40	53	150	263	124	48	37	57	12	68	193	272	108	56	40	9.9067e+07	Gm20110	FALSE	FALSE	FALSE
chr10	108056392	108056586	194	82	39	35	121	138	52	31	36	55	9	55	126	126	78	45	31	1.08056e+08	Syt1	FALSE	FALSE	FALSE
chr10	6225535	6225728	193	45	69	96	39	33	78	111	115	29	229	100	35	36	140	101	108	6.22562e+06	Mthfd1l	FALSE	TRUE	FALSE
chr10	76705717	76705910	193	87	102	110	125	88	70	138	119	99	81	115	78	81	109	107	107	7.67058e+07	Gm10941	FALSE	FALSE	FALSE
chr10	120073124	120073317	193	79	120	138	81	71	70	150	167	68	209	115	63	82	119	119	113	1.20073e+08	4921513I03Rik	FALSE	TRUE	FALSE
chr10	79158551	79158743	192	24	44	63	36	34	91	48	86	54	184	63	53	55	192	57	86	7.91587e+07	Gzmm	TRUE	FALSE	FALSE
chr10	80396503	80396695	192	27	73	60	36	32	68	83	56	20	151	64	39	42	104	73	57	80396606	Gadd45b	TRUE	FALSE	FALSE
chr10	80421883	80422075	192	133	84	85	100	93	43	83	118	111	86	94	53	81	59	77	126	8.04219e+07	Gng7	FALSE	FALSE	FALSE
chr10	87009197	87009389	192	46	50	56	19	22	108	51	62	58	91	60	34	65	101	61	60	8.70093e+07	Pah	TRUE	FALSE	FALSE
chr10	120876414	120876606	192	85	66	89	72	42	74	101	106	74	222	96	51	55	136	97	110	1.20876e+08	Rassf3	FALSE	TRUE	FALSE
chr10	62585415	62585606	191	88	75	85	149	126	145	91	111	86	69	104	151	163	129	89	111	6.25855e+07	Mypn	FALSE	FALSE	FALSE
chr10	79400124	79400315	191	24	50	36	68	35	35	41	48	13	144	45	64	48	101	46	41	7.94002e+07	Arid3a	TRUE	FALSE	FALSE
chr10	80448562	80448753	191	34	59	54	80	53	64	59	68	52	188	47	49	47	142	43	61	8.04487e+07	Gng7	TRUE	FALSE	FALSE
chr10	127049202	127049393	191	32	30	48	15	16	29	69	52	65	109	54	22	27	114	67	46	1.27049e+08	Lrp1	TRUE	FALSE	FALSE
chr10	24642907	24643097	190	131	120	69	70	79	53	59	87	131	64	89	64	81	52	61	103	2.4643e+07	Arg1	FALSE	FALSE	TRUE
chr10	70802908	70803098	190	47	49	48	9	13	14	33	60	46	107	40	15	21	15	31	42	7.0803e+07	Cisd1	FALSE	TRUE	FALSE
chr10	127104085	127104275	190	72	125	104	186	45	86	138	118	94	309	84	99	55	229	90	73	1.27104e+08	1700012D01Rik	TRUE	FALSE	FALSE
chr10	7905417	7905606	189	10	67	64	80	15	20	50	70	21	137	69	85	21	44	31	70	7.9055e+06	Tab2	FALSE	TRUE	FALSE
chr10	41010902	41011091	189	248	159	120	302	374	153	91	144	219	97	158	300	376	262	140	150	4.1011e+07	Fig4	FALSE	FALSE	FALSE
chr10	41238539	41238728	189	24	56	37	39	24	38	34	51	33	154	41	34	27	108	36	51	4.12386e+07	Cd164	TRUE	FALSE	FALSE
chr10	43236943	43237132	189	36	98	55	10	15	111	45	88	10	246	51	13	22	187	51	49	4.3237e+07	1700021F05Rik	TRUE	FALSE	FALSE
chr10	68762836	68763025	189	397	384	166	411	334	160	108	145	421	215	261	347	381	258	170	180	6.8763e+07	Cdk1	FALSE	FALSE	TRUE
chr10	94727360	94727549	189	34	67	48	41	28	53	67	48	33	237	44	36	49	146	41	53	9.47275e+07	Cradd	TRUE	FALSE	FALSE
chr10	96148837	96149026	189	197	116	75	168	149	60	50	70	190	56	104	133	156	92	67	118	9.61489e+07	Btg1	FALSE	FALSE	TRUE
chr10	83887289	83887477	188	124	82	146	46	52	66	166	165	135	185	126	64	64	90	128	152	8.38874e+07	Nuak1	FALSE	TRUE	FALSE
chr10	127648785	127648973	188	16	36	34	63	25	55	31	45	15	104	29	48	27	112	27	30	1.27649e+08	Spryd4	TRUE	FALSE	FALSE
chr10	21185008	21185195	187	25	54	38	20	10	29	29	50	101	81	52	17	6	25	38	63	2.11851e+07	Aldh8a1	FALSE	FALSE	FALSE
chr10	58966684	58966871	187	59	80	91	48	46	87	110	93	63	172	77	55	87	130	60	80	5.89668e+07	Ccdc109a	TRUE	FALSE	FALSE
chr10	60242452	60242639	187	87	122	105	53	43	104	116	121	102	222	98	58	57	162	90	103	6.02425e+07	Unc5b	TRUE	FALSE	FALSE
chr10	67703965	67704152	187	67	81	97	43	47	58	97	117	116	141	102	48	86	46	92	118	6.77041e+07	Arid5b	FALSE	TRUE	FALSE
chr10	10299779	10299965	186	234	187	172	275	211	124	171	201	210	206	207	176	176	181	182	223	1.02999e+07	Rab32	FALSE	FALSE	TRUE
chr10	25259777	25259963	186	121	86	67	210	187	78	53	62	142	34	75	132	179	86	71	54	2.52599e+07	2010003K15Rik	FALSE	FALSE	TRUE
chr10	60740699	60740885	186	40	47	65	23	12	61	58	101	20	174	55	32	27	107	50	59	6.07408e+07	Adamts14	FALSE	TRUE	FALSE
chr10	60999874	61000060	186	47	65	108	97	57	56	124	111	88	236	98	74	45	101	104	114	6.09999e+07	Lrrc20	FALSE	TRUE	FALSE
chr10	115217295	115217481	186	92	147	118	57	35	24	124	123	145	249	119	54	39	59	109	119	1.15217e+08	Tspan8	FALSE	TRUE	FALSE
chr10	121695860	121696046	186	95	93	42	86	62	36	6	20	128	30	53	119	72	33	11	32	1.21696e+08	Gm4489	FALSE	FALSE	TRUE
chr10	127013476	127013662	186	80	135	149	43	62	95	185	172	69	587	142	71	41	324	143	145	1.27014e+08	Lrp1	FALSE	TRUE	FALSE
chr10	127382715	127382901	186	245	171	243	220	286	154	240	327	224	217	227	174	291	174	234	280	1.27383e+08	Sdr9c7	FALSE	FALSE	FALSE
chr10	95222884	95223069	185	132	186	114	60	59	40	102	142	114	274	131	78	83	49	99	120	9.5223e+07	Eea1	FALSE	TRUE	FALSE
chr10	128133588	128133773	185	108	46	70	31	19	31	71	80	110	41	67	23	28	29	53	74	1.28134e+08	Rab5b	FALSE	FALSE	FALSE
chr10	31327362	31327546	184	172	121	74	120	212	72	48	50	229	36	88	121	216	76	40	80	3.13274e+07	Rnf217	FALSE	FALSE	TRUE
chr10	43229131	43229315	184	68	151	176	57	51	160	195	206	95	535	153	43	83	291	151	137	4.32292e+07	Bend3	FALSE	TRUE	FALSE
chr10	58879028	58879212	184	18	34	28	10	3	44	40	25	4	122	35	18	24	79	38	19	5.88791e+07	Pla2g12b	TRUE	FALSE	FALSE
chr10	66753923	66754107	184	86	132	125	140	64	115	100	151	121	185	126	112	66	98	102	143	66754013	Nrbf2	FALSE	TRUE	FALSE
chr10	93560947	93561131	184	452	410	202	300	416	211	136	172	486	122	253	267	383	175	122	189	9.3561e+07	Fgd6	FALSE	FALSE	FALSE
chr10	114236647	114236831	184	162	92	43	75	93	61	22	41	224	29	67	63	76	43	30	54	1.14237e+08	Trhde	FALSE	FALSE	TRUE
chr10	39838581	39838764	183	32	61	22	19	16	7	17	19	15	104	43	29	23	14	20	40	3.98387e+07	Slc16a10	FALSE	TRUE	FALSE
chr10	60893996	60894179	183	105	143	102	78	87	92	95	108	114	87	94	68	107	66	69	104	6.08941e+07	Nodal	FALSE	FALSE	FALSE
chr10	79711840	79712023	183	54	44	82	40	24	69	130	75	65	95	57	47	27	77	76	42	7.97119e+07	Ndufs7	FALSE	TRUE	FALSE
chr10	87182824	87183007	183	42	29	42	160	161	68	37	62	52	41	64	151	135	81	65	67	8.71829e+07	Igf1	FALSE	FALSE	FALSE
chr10	96387426	96387609	183	164	58	59	161	137	63	33	51	266	38	71	120	133	61	50	68	9.63876e+07	4930556N09Rik	FALSE	FALSE	TRUE
chr10	62487007	62487189	182	89	79	125	51	33	141	133	132	110	150	126	65	77	171	127	130	6.24871e+07	Pbld2	TRUE	FALSE	FALSE
chr10	75384037	75384219	182	31	56	48	83	37	57	59	61	33	170	67	70	21	134	63	82	7.53841e+07	Smarcb1	TRUE	FALSE	FALSE
chr10	79557050	79557232	182	35	31	33	19	32	44	30	54	85	118	32	13	32	118	30	42	79557141	Sbno2	TRUE	FALSE	FALSE
chr10	80132929	80133111	182	9	26	30	14	9	31	38	37	25	150	28	7	43	111	22	34	8.0133e+07	Mknk2	TRUE	FALSE	FALSE
chr10	92608104	92608286	182	138	241	253	112	110	256	288	302	119	468	245	166	204	429	239	232	9.26081e+07	Cdk17	TRUE	FALSE	FALSE
chr10	98674253	98674435	182	312	255	142	397	303	151	120	147	311	155	165	293	273	217	119	148	9.86744e+07	Dusp6	FALSE	FALSE	TRUE
chr10	124791122	124791304	182	64	67	30	52	65	46	25	22	110	30	32	46	45	25	18	30	1.24791e+08	Slc16a7	FALSE	FALSE	TRUE
chr10	29720746	29720927	181	119	50	39	52	75	37	31	44	122	60	60	45	84	32	29	70	2.97208e+07	Cenpw	FALSE	FALSE	FALSE
chr10	5741767	5741947	180	211	241	171	238	205	190	151	174	237	164	228	224	179	217	196	242	5.74187e+06	Esr1	FALSE	FALSE	TRUE
chr10	18729211	18729391	180	84	61	41	102	125	48	26	45	99	36	64	118	128	43	36	82	1.87293e+07	Tnfaip3	FALSE	FALSE	TRUE
chr10	20051188	20051368	180	15	2	18	109	127	75	20	26	8	10	25	111	122	59	26	30	20051255	Bclaf1	FALSE	FALSE	FALSE
chr10	60210539	60210719	180	29	37	93	52	46	27	97	104	54	99	80	42	30	45	82	82	6.02106e+07	Slc29a3	FALSE	FALSE	FALSE
chr10	64520889	64521069	180	106	41	33	96	136	43	33	25	171	26	44	55	97	72	46	33	6.4521e+07	Lrrtm3	FALSE	FALSE	TRUE
chr10	66507098	66507278	180	73	66	40	105	108	33	23	43	103	38	41	65	72	66	30	39	6.65071e+07	Reep3	FALSE	FALSE	TRUE
chr10	79862481	79862661	180	13	44	35	60	23	51	29	49	26	158	40	48	40	105	38	42	7.98626e+07	Mbd3	TRUE	FALSE	FALSE
chr10	114700379	114700559	180	114	40	62	176	254	157	63	75	116	17	72	177	272	92	66	60	1.147e+08	Tbc1d15	FALSE	FALSE	FALSE
chr10	38891049	38891228	179	15	29	50	15	9	55	76	38	33	70	47	19	27	101	55	44	3.88911e+07	Wisp3	TRUE	FALSE	FALSE
chr10	40244321	40244500	179	98	170	84	167	106	63	79	76	116	198	118	137	109	78	86	123	4.02444e+07	Slc22a16	FALSE	FALSE	TRUE
chr10	41922458	41922637	179	75	107	104	63	52	107	103	140	87	248	98	86	64	181	96	94	4.19226e+07	Foxo3	TRUE	FALSE	FALSE
chr10	43722551	43722730	179	72	107	47	130	38	39	45	52	52	85	68	84	42	77	44	67	4.37226e+07	Aim1	FALSE	FALSE	TRUE
chr10	126427562	126427741	179	65	94	59	52	38	63	79	65	41	173	56	43	40	41	52	51	1.26428e+08	Ctdsp2	FALSE	TRUE	FALSE
chr10	53102638	53102816	178	101	53	47	165	166	89	37	65	95	15	56	124	139	78	46	61	5.31027e+07	Gm9766	FALSE	FALSE	FALSE
chr10	59378985	59379163	178	76	117	83	110	75	91	71	94	115	137	96	96	85	149	72	114	5.93791e+07	Ddit4	TRUE	FALSE	FALSE
chr10	67745907	67746085	178	36	68	59	99	41	66	61	71	42	219	73	87	34	186	68	77	6.7746e+07	Arid5b	TRUE	FALSE	FALSE
chr10	70655671	70655849	178	68	120	119	65	43	41	150	125	83	189	130	47	45	76	144	117	7.06557e+07	C730027H18Rik	FALSE	TRUE	FALSE
chr10	80781552	80781730	178	38	66	81	43	34	99	98	95	40	212	90	46	41	204	102	66	8.07816e+07	2510012J08Rik	TRUE	FALSE	FALSE
chr10	84274106	84274284	178	288	171	220	266	236	157	218	229	371	194	212	223	224	211	220	208	84274198	Rfx4	FALSE	FALSE	TRUE
chr10	96712489	96712667	178	163	74	47	109	103	94	27	57	152	14	58	101	156	50	32	27	9.67126e+07	Mir3966	FALSE	FALSE	TRUE
chr10	127192013	127192191	178	196	164	134	239	258	77	102	157	217	159	138	205	190	94	90	190	1.27192e+08	Gpr182	FALSE	FALSE	TRUE
chr10	5674363	5674540	177	160	182	226	88	104	94	235	296	197	536	188	64	93	128	222	164	5.67441e+06	Esr1	FALSE	TRUE	FALSE
chr10	23642459	23642636	177	135	73	62	243	194	139	34	82	190	68	75	218	184	135	57	67	2.36425e+07	Taar1	FALSE	FALSE	TRUE
chr10	41618027	41618204	177	3	33	4	3	8	10	4	7	0	224	2	5	5	8	0	3	4.16181e+07	Sesn1	FALSE	TRUE	FALSE
chr10	61197074	61197251	177	62	128	106	100	65	114	78	157	74	383	78	70	74	227	59	103	6.11971e+07	Aifm2	TRUE	FALSE	FALSE
chr10	80504267	80504444	177	69	63	89	66	37	68	105	110	61	224	101	74	45	141	108	106	8.05044e+07	Slc39a3	FALSE	TRUE	FALSE
chr10	86792377	86792554	177	65	17	25	118	179	95	31	28	99	6	34	104	175	58	24	35	8.67925e+07	Ascl1	FALSE	FALSE	FALSE
chr10	111139762	111139939	177	259	160	142	342	259	162	114	142	265	128	174	289	312	199	143	200	1.1114e+08	4933440J02Rik	FALSE	FALSE	TRUE
chr10	43231382	43231558	176	48	52	50	57	26	73	70	55	40	110	53	42	44	151	55	71	4.32314e+07	Bend3	TRUE	FALSE	FALSE
chr10	66550280	66550456	176	131	100	75	240	220	82	57	90	81	91	106	224	220	158	77	111	6.65503e+07	Reep3	FALSE	FALSE	FALSE
chr10	79561466	79561642	176	68	69	93	32	43	96	109	105	51	218	112	60	78	143	121	103	7.95616e+07	Sbno2	FALSE	TRUE	FALSE
chr10	80422110	80422286	176	105	75	49	66	72	50	45	66	105	53	67	53	52	56	54	84	8.04222e+07	Gng7	FALSE	FALSE	FALSE
chr10	107891774	107891950	176	37	117	86	37	34	99	87	109	35	283	86	53	63	164	66	87	1.07892e+08	Pawr	TRUE	FALSE	FALSE
chr10	127041752	127041928	176	82	170	142	75	80	162	158	150	117	355	136	85	84	226	139	107	1.27042e+08	Lrp1	TRUE	FALSE	FALSE
chr10	127691117	127691293	176	199	138	100	137	142	63	105	92	157	150	134	131	125	90	86	147	1.27691e+08	Apon	FALSE	FALSE	TRUE
chr10	128227843	128228019	176	143	137	133	118	87	62	108	160	176	134	151	101	107	97	124	193	1.28228e+08	Mmp19	FALSE	FALSE	FALSE
chr10	5612284	5612459	175	71	125	118	50	24	34	101	141	52	122	100	38	27	44	68	109	5.61234e+06	Esr1	FALSE	TRUE	FALSE
chr10	39152515	39152690	175	71	164	168	96	104	106	152	230	100	296	191	89	110	146	142	223	3.91526e+07	Fyn	FALSE	TRUE	FALSE
chr10	89218104	89218279	175	129	132	116	227	166	93	124	117	124	137	131	170	137	152	105	165	8.92182e+07	Uhrf1bp1l	FALSE	FALSE	TRUE
chr10	116893629	116893804	175	262	198	153	272	248	154	116	154	353	147	181	245	262	184	154	187	1.16894e+08	Cpsf6	FALSE	FALSE	TRUE
chr10	12307931	12308105	174	81	111	37	50	100	46	21	30	66	20	45	59	76	40	21	21	1.2308e+07	Utrn	FALSE	FALSE	FALSE
chr10	66488506	66488680	174	231	242	220	263	192	188	182	250	314	245	259	248	222	247	197	291	6.64885e+07	Reep3	FALSE	FALSE	TRUE
chr10	82352480	82352654	174	88	136	108	47	35	78	110	135	56	301	117	58	49	87	122	118	8.23525e+07	Txnrd1	FALSE	TRUE	FALSE
chr10	82764646	82764820	174	70	71	75	46	55	46	64	84	97	113	75	41	78	54	67	70	8.27647e+07	Slc41a2	FALSE	TRUE	FALSE
chr10	98651960	98652134	174	166	143	74	130	106	51	55	80	159	92	96	88	97	75	63	82	98652018	Poc1b	FALSE	FALSE	TRUE
chr10	27794669	27794842	173	134	174	178	649	103	237	257	182	162	559	199	341	138	516	215	248	2.77947e+07	Ptprk	TRUE	FALSE	FALSE
chr10	58990552	58990725	173	109	108	39	38	32	17	49	26	113	80	68	35	36	32	44	66	5.89907e+07	Ccdc109a	FALSE	FALSE	FALSE
chr10	67587848	67588021	173	194	98	63	249	242	117	41	62	208	29	80	182	239	74	45	43	6.75879e+07	Arid5b	FALSE	FALSE	TRUE
chr10	76590855	76591028	173	38	35	58	29	18	68	63	70	31	107	49	28	51	113	45	56	7.65909e+07	Col18a1	TRUE	FALSE	FALSE
chr10	79158857	79159030	173	33	54	64	65	57	118	46	89	49	148	70	88	70	174	43	95	7.91589e+07	Gzmm	TRUE	FALSE	FALSE
chr10	80753909	80754082	173	27	33	33	43	33	46	35	47	30	106	34	50	47	127	27	63	8.0754e+07	Tjp3	TRUE	FALSE	FALSE
chr10	95242634	95242807	173	179	247	274	159	147	144	333	311	198	410	246	147	156	170	262	250	9.52427e+07	Eea1	FALSE	TRUE	FALSE
chr10	98632497	98632670	173	119	125	39	172	140	96	18	47	144	72	79	144	148	95	51	48	9.86326e+07	Poc1b	FALSE	FALSE	TRUE
chr10	116757734	116757907	173	102	107	65	54	98	50	47	79	160	66	80	51	122	42	78	66	1.16758e+08	Lyz1	FALSE	FALSE	FALSE
chr10	122051865	122052038	173	67	50	64	125	62	51	25	80	147	28	76	80	66	73	48	88	1.22052e+08	A130077B15Rik	FALSE	FALSE	TRUE
chr10	95419362	95419534	172	28	22	29	94	114	53	32	34	41	6	37	74	121	57	32	45	95419454	Eea1	FALSE	FALSE	FALSE
chr10	116780272	116780444	172	74	39	33	72	117	37	25	27	72	15	29	60	99	31	17	26	1.1678e+08	Cpsf6	FALSE	FALSE	TRUE
chr10	13708229	13708400	171	192	256	229	135	163	124	212	256	298	415	259	142	177	108	228	244	1.37083e+07	Hivep2	FALSE	TRUE	FALSE
chr10	19793416	19793587	171	15	88	41	46	15	45	35	50	14	310	46	48	44	126	44	32	1.97935e+07	Map3k5	TRUE	FALSE	FALSE
chr10	59027300	59027471	171	42	226	53	97	84	53	21	27	33	68	81	143	131	52	30	28	5.90275e+07	Ccdc109a	FALSE	FALSE	TRUE
chr10	99017744	99017915	171	50	12	7	25	56	29	6	11	111	0	10	31	51	15	6	7	9.90178e+07	Gm20110	FALSE	FALSE	TRUE
chr10	122558001	122558172	171	67	28	35	73	81	70	35	37	93	20	52	67	104	40	46	59	122558114	Usp15	FALSE	FALSE	TRUE
chr10	13702894	13703064	170	95	88	129	301	110	153	171	151	134	323	137	206	123	402	137	208	1.3703e+07	Hivep2	TRUE	FALSE	FALSE
chr10	19797104	19797274	170	141	117	51	89	65	36	23	41	140	41	54	96	58	40	29	34	1.97972e+07	Map3k5	FALSE	FALSE	TRUE
chr10	40214720	40214890	170	144	142	72	106	171	85	53	56	152	162	119	123	131	79	71	122	4.02148e+07	Slc22a16	FALSE	FALSE	TRUE
chr10	41272688	41272858	170	58	125	107	73	55	109	106	125	81	324	128	68	88	183	108	150	4.12728e+07	Ccdc162	TRUE	FALSE	FALSE
chr10	67248476	67248646	170	119	110	56	131	122	75	33	54	179	46	80	122	168	99	51	42	6.72485e+07	Zfp365	FALSE	FALSE	TRUE
chr10	83979161	83979331	170	21	40	41	14	18	51	53	44	14	180	36	13	14	116	34	33	8.39793e+07	Ckap4	TRUE	FALSE	FALSE
chr10	94037616	94037786	170	280	245	291	233	214	308	333	325	312	414	282	211	195	423	295	301	9.40377e+07	Tmcc3	TRUE	FALSE	FALSE
chr10	94643021	94643191	170	11	67	24	20	17	22	19	27	6	183	44	26	20	57	22	38	9.46431e+07	Cradd	FALSE	TRUE	FALSE
chr10	99065081	99065251	170	372	220	165	372	335	127	142	148	394	159	181	224	306	154	139	198	9.90652e+07	Gm20110	FALSE	FALSE	TRUE
chr10	110842203	110842373	170	121	155	56	97	141	55	47	46	152	87	91	101	104	96	54	72	1.10842e+08	Nap1l1	FALSE	FALSE	FALSE
chr10	17403851	17404020	169	193	137	169	206	128	68	179	178	187	166	155	153	120	150	141	177	17404018	Cited2	FALSE	FALSE	FALSE
chr10	21015512	21015681	169	110	74	57	75	142	129	59	60	125	58	74	74	149	98	64	83	2.10156e+07	Hbs1l	FALSE	FALSE	FALSE
chr10	59350916	59351085	169	20	46	64	36	49	80	89	70	28	120	60	33	55	123	70	78	5.9351e+07	Dnajb12	TRUE	FALSE	FALSE
chr10	59446347	59446516	169	114	142	195	101	51	122	243	223	96	357	171	78	86	163	187	165	5.94464e+07	Ascc1	FALSE	TRUE	FALSE
chr10	77032797	77032966	169	87	61	67	52	37	75	45	83	107	84	65	54	48	139	46	72	7.70329e+07	Pttg1ip	TRUE	FALSE	FALSE
chr10	89099780	89099949	169	234	75	71	247	324	172	47	77	353	31	95	201	323	95	71	97	8.90999e+07	Slc17a8	FALSE	FALSE	TRUE
chr10	94882467	94882636	169	56	40	29	138	155	70	36	27	53	30	51	115	162	79	55	45	9.48826e+07	5730420D15Rik	FALSE	FALSE	FALSE
chr10	110773212	110773381	169	88	109	108	30	30	129	140	125	101	291	100	34	65	310	121	89	1.10773e+08	Bbs10	TRUE	FALSE	FALSE
chr10	126748613	126748782	169	116	186	208	301	103	235	284	225	148	661	200	213	139	553	205	216	1.26749e+08	Mars	TRUE	FALSE	FALSE
chr10	126958913	126959082	169	117	174	134	59	69	57	155	151	122	317	134	63	55	71	127	114	1.26959e+08	Shmt2	FALSE	TRUE	FALSE
chr10	13686686	13686854	168	24	64	42	62	7	29	49	44	40	230	48	50	15	162	55	35	1.36868e+07	Hivep2	TRUE	FALSE	FALSE
chr10	60577225	60577393	168	189	132	51	91	141	86	35	37	160	36	67	92	143	57	29	49	6.05773e+07	Sgpl1	FALSE	FALSE	TRUE
chr10	76579305	76579473	168	124	187	202	75	80	120	207	263	114	488	178	68	61	293	175	177	7.65794e+07	Col18a1	TRUE	FALSE	FALSE
chr10	79516962	79517130	168	55	68	68	60	25	53	73	85	47	224	58	72	41	126	61	73	7.9517e+07	Gpx4	FALSE	TRUE	FALSE
chr10	85809042	85809210	168	46	38	28	72	129	48	20	34	40	15	33	63	104	38	24	29	8.58091e+07	Timp3	FALSE	FALSE	FALSE
chr10	94891891	94892059	168	119	62	54	133	212	114	35	77	179	36	73	164	293	70	48	66	9.4892e+07	5730420D15Rik	FALSE	FALSE	TRUE
chr10	114820714	114820882	168	44	28	34	110	246	92	43	41	60	11	46	131	238	66	33	32	1.14821e+08	Thap2	FALSE	FALSE	FALSE
chr10	24631136	24631303	167	66	74	74	79	59	52	71	95	62	111	81	76	41	56	59	107	2.46312e+07	Med23	FALSE	TRUE	FALSE
chr10	39112921	39113088	167	49	42	36	12	16	13	32	27	110	23	40	11	13	20	42	23	3.9113e+07	Fyn	FALSE	FALSE	FALSE
chr10	39861535	39861702	167	14	42	32	62	15	29	41	31	10	110	32	32	14	72	28	30	3.98616e+07	Slc16a10	FALSE	TRUE	FALSE
chr10	41061217	41061384	167	122	99	143	81	98	91	124	158	134	131	111	65	94	146	89	123	4.10613e+07	Fig4	FALSE	TRUE	FALSE
chr10	53127356	53127523	167	339	304	189	464	460	213	130	211	397	120	210	444	422	237	128	200	5.31274e+07	Gm9766	FALSE	FALSE	TRUE
chr10	78037395	78037562	167	11	29	36	19	9	38	57	36	19	109	31	15	15	97	44	21	7.80375e+07	Ilvbl	TRUE	FALSE	FALSE
chr10	86349330	86349497	167	97	21	43	151	132	65	43	60	176	17	43	123	148	84	43	51	8.63494e+07	Stab2	FALSE	FALSE	TRUE
chr10	87519837	87520004	167	153	129	178	67	96	74	177	217	202	197	153	75	103	72	136	166	8.75199e+07	Pmch	FALSE	TRUE	FALSE
chr10	95241360	95241527	167	120	59	61	192	189	107	59	70	119	29	56	157	160	84	47	74	9.52414e+07	Eea1	FALSE	FALSE	FALSE
chr10	110827013	110827180	167	50	130	99	69	54	40	107	102	52	242	111	70	34	67	110	79	1.10827e+08	Nap1l1	FALSE	TRUE	FALSE
chr10	116850911	116851078	167	201	174	128	133	94	101	81	122	194	141	145	117	110	91	95	130	1.16851e+08	Cpsf6	FALSE	FALSE	FALSE
chr10	20315025	20315191	166	120	90	49	92	84	45	32	49	107	54	81	72	49	67	51	92	2.03151e+07	Pde7b	FALSE	FALSE	TRUE
chr10	26071091	26071257	166	135	85	141	91	59	74	136	195	165	180	141	87	61	136	117	173	2.60712e+07	L3mbtl3	FALSE	TRUE	FALSE
chr10	40350882	40351048	166	142	86	141	62	76	54	136	197	257	171	135	58	69	75	135	177	4.0351e+07	Ddo	FALSE	FALSE	FALSE
chr10	41711354	41711520	166	192	119	126	237	196	126	128	125	96	68	114	144	182	143	118	118	4.17115e+07	Armc2	FALSE	FALSE	FALSE
chr10	60914201	60914367	166	144	161	116	112	117	73	120	127	102	157	151	97	125	82	128	139	6.09143e+07	Eif4ebp2	FALSE	TRUE	FALSE
chr10	62710335	62710501	166	169	133	55	122	133	43	33	34	174	39	71	113	93	41	47	30	6.27104e+07	Herc4	FALSE	FALSE	TRUE
chr10	67919888	67920054	166	48	100	64	15	12	22	68	74	63	328	72	31	22	33	54	70	6.792e+07	1700040L02Rik	FALSE	TRUE	FALSE
chr10	79899280	79899446	166	93	121	77	61	63	71	73	97	120	69	89	63	48	81	66	108	7.98993e+07	Tcf3	FALSE	FALSE	FALSE
chr10	121454933	121455099	166	68	75	118	89	107	52	119	142	92	134	110	66	90	79	107	130	1.21455e+08	Srgap1	FALSE	FALSE	FALSE
chr10	124937554	124937720	166	46	36	26	79	105	56	14	31	35	33	31	52	86	53	35	25	1.24938e+08	Slc16a7	FALSE	FALSE	FALSE
chr10	26837159	26837324	165	52	14	29	92	255	142	41	34	60	3	38	114	260	43	48	22	2.68372e+07	Lama2	FALSE	FALSE	FALSE
chr10	80053017	80053182	165	11	61	41	81	18	74	55	52	17	203	49	81	27	166	53	53	8.00531e+07	Fam108a	TRUE	FALSE	FALSE
chr10	93605346	93605511	165	164	164	73	69	176	87	51	70	188	96	100	63	145	52	42	95	9.36054e+07	Fgd6	FALSE	FALSE	FALSE
chr10	53793462	53793626	164	147	134	101	173	138	78	82	104	194	124	115	131	177	126	105	109	5.37936e+07	Man1a	FALSE	FALSE	TRUE
chr10	58704140	58704304	164	16	121	63	25	14	26	44	70	39	269	66	33	20	77	45	61	5.87042e+07	Ankrd57	FALSE	TRUE	FALSE
chr10	61088972	61089136	164	28	73	83	141	31	80	117	81	40	312	81	118	31	283	92	82	6.1089e+07	Npffr1	TRUE	FALSE	FALSE
chr10	69358537	69358701	164	127	200	126	98	81	161	134	139	138	230	139	78	148	213	101	124	6.93586e+07	Ank3	TRUE	FALSE	FALSE
chr10	75012825	75012989	164	153	147	82	130	153	96	73	74	132	60	93	115	187	56	61	71	75012900	AI646023	FALSE	FALSE	TRUE
chr10	79391212	79391376	164	74	106	99	45	6	56	92	124	66	463	114	61	32	320	151	86	7.93913e+07	Arid3a	TRUE	FALSE	FALSE
chr10	88193711	88193875	164	162	218	231	99	63	308	255	256	181	559	175	80	96	438	203	179	8.81938e+07	Gm4925	TRUE	FALSE	FALSE
chr10	94848454	94848618	164	291	104	89	181	257	97	82	60	363	53	98	174	194	100	81	80	9.48485e+07	Socs2	FALSE	FALSE	TRUE
chr10	126725063	126725227	164	243	191	244	105	72	68	258	286	267	350	205	117	69	99	210	185	1.26725e+08	Mbd6	FALSE	TRUE	FALSE
chr10	126727449	126727613	164	93	142	110	299	38	114	134	123	86	482	110	144	66	370	133	107	126727535	Ddit3	TRUE	FALSE	FALSE
chr10	42480947	42481110	163	15	53	12	9	4	5	11	9	13	121	20	15	9	15	14	15	4.2481e+07	Sec63	FALSE	TRUE	FALSE
chr10	79265279	79265442	163	78	90	109	69	37	88	130	125	32	235	117	74	71	232	140	117	7.92653e+07	Palm	TRUE	FALSE	FALSE
chr10	87970732	87970895	163	172	51	33	103	123	82	23	35	237	11	39	120	140	38	33	21	8.79708e+07	Chpt1	FALSE	FALSE	TRUE
chr10	95299208	95299371	163	109	115	89	117	86	51	78	115	163	177	108	86	81	78	88	123	9.52993e+07	Eea1	FALSE	TRUE	FALSE
chr10	69373147	69373309	162	59	98	85	59	50	60	88	90	91	181	98	57	63	83	87	105	69373224	Ank3	FALSE	TRUE	FALSE
chr10	79796156	79796318	162	92	80	114	71	44	148	148	114	106	319	102	66	65	320	119	93	7.97962e+07	Reep6	TRUE	FALSE	FALSE
chr10	98816630	98816792	162	142	131	87	125	154	109	39	61	175	25	82	135	180	67	41	47	9.88167e+07	Dusp6	FALSE	FALSE	TRUE
chr10	126792494	126792656	162	151	272	284	112	151	175	275	375	168	708	262	94	163	227	256	290	1.26793e+08	Inhbc	FALSE	TRUE	FALSE
chr10	87181240	87181401	161	92	85	47	85	104	52	30	38	126	58	66	83	122	58	46	70	8.71813e+07	Igf1	FALSE	FALSE	TRUE
chr10	107869330	107869491	161	187	232	133	356	194	130	114	101	176	106	186	263	195	158	113	135	1.07869e+08	Pawr	FALSE	FALSE	TRUE
chr10	110981011	110981172	161	20	78	49	41	55	49	61	56	38	128	84	58	60	74	80	68	1.10981e+08	Phlda1	FALSE	TRUE	FALSE
chr10	119638521	119638682	161	42	121	75	212	28	68	93	74	44	492	85	149	39	216	77	97	1.19639e+08	Irak3	TRUE	FALSE	FALSE
chr10	127077152	127077313	161	50	105	45	88	37	25	39	45	48	143	59	135	57	62	25	39	1.27077e+08	Stat6	FALSE	FALSE	TRUE
chr10	13588427	13588587	160	42	189	83	143	53	80	100	90	33	517	100	143	73	236	88	75	1.35885e+07	Aig1	FALSE	TRUE	FALSE
chr10	17957135	17957295	160	70	137	160	146	85	68	162	151	67	207	181	152	62	84	167	145	1.79572e+07	Ccdc28a	FALSE	TRUE	FALSE
chr10	27807303	27807463	160	50	105	51	51	69	40	37	52	66	79	71	49	49	37	49	59	2.78074e+07	Ptprk	FALSE	FALSE	TRUE
chr10	53637537	53637697	160	120	91	73	106	41	17	73	67	44	129	80	86	35	44	51	64	5.36375e+07	Man1a	FALSE	TRUE	FALSE
chr10	61127984	61128144	160	100	80	90	115	50	56	102	97	67	128	74	45	42	67	75	79	6.1128e+07	Ppa1	FALSE	TRUE	FALSE
chr10	80557104	80557264	160	46	42	52	22	28	46	52	71	59	106	55	26	26	58	51	55	8.05572e+07	Creb3l3	TRUE	FALSE	FALSE
chr10	83976887	83977047	160	177	93	128	121	112	83	112	140	265	96	139	142	125	78	149	156	8.3977e+07	Ckap4	FALSE	FALSE	FALSE
chr10	95220902	95221062	160	194	194	126	56	44	58	111	140	320	240	171	59	49	98	137	175	9.5221e+07	Eea1	FALSE	FALSE	FALSE
chr10	121062924	121063084	160	32	39	27	87	15	19	36	32	28	116	29	54	16	67	39	24	1.21063e+08	Xpot	FALSE	TRUE	FALSE
chr10	128403061	128403221	160	124	112	37	63	73	32	21	29	157	51	55	63	80	36	28	36	1.28403e+08	Mettl7b	FALSE	FALSE	TRUE
chr10	7561624	7561783	159	241	357	430	390	257	379	526	497	319	829	445	321	322	849	496	448	7.56171e+06	Zc3h12d	TRUE	FALSE	FALSE
chr10	30472443	30472602	159	55	44	32	87	108	58	20	36	80	28	41	92	91	33	21	22	3.04725e+07	Ncoa7	FALSE	FALSE	TRUE
chr10	75260440	75260599	159	105	123	117	102	71	108	120	124	132	267	114	80	70	158	113	110	75260530	Gstt1	TRUE	FALSE	FALSE
chr10	86410348	86410507	159	95	156	63	72	78	57	40	58	84	160	116	117	77	71	57	91	86410495	Stab2	FALSE	FALSE	TRUE
chr10	93512003	93512162	159	21	72	38	35	14	41	38	48	31	176	46	46	22	65	36	38	93512065	Fgd6	FALSE	TRUE	FALSE
chr10	98733170	98733329	159	183	176	223	111	136	166	226	237	203	169	201	125	141	182	188	228	9.87332e+07	Dusp6	FALSE	TRUE	FALSE
chr10	98922448	98922607	159	157	158	111	147	207	97	82	123	182	97	131	155	151	86	84	171	9.89225e+07	Gm20110	FALSE	FALSE	TRUE
chr10	126508363	126508522	159	124	94	85	61	63	37	73	96	83	75	96	57	84	48	74	118	1.26508e+08	LOC100504703	FALSE	FALSE	FALSE
chr10	10040992	10041150	158	171	117	169	135	91	158	174	208	144	266	156	117	104	251	168	182	1.00411e+07	Rab32	TRUE	FALSE	FALSE
chr10	12478156	12478314	158	85	103	78	65	64	51	54	93	123	85	95	74	77	51	75	112	1.24782e+07	Utrn	FALSE	FALSE	FALSE
chr10	26715891	26716049	158	61	35	48	116	127	46	51	43	40	12	59	149	150	60	58	28	2.67159e+07	Lama2	FALSE	FALSE	FALSE
chr10	31245642	31245800	158	151	167	88	187	177	92	52	74	182	140	131	191	251	158	74	133	3.12457e+07	Rnf217	FALSE	FALSE	TRUE
chr10	62873413	62873571	158	63	147	101	101	62	56	79	84	18	141	110	73	68	49	84	96	6.28735e+07	Ctnna3	FALSE	TRUE	FALSE
chr10	77756313	77756471	158	288	371	310	294	167	342	312	333	296	740	305	311	261	553	284	307	7.77564e+07	Agpat3	TRUE	FALSE	FALSE
chr10	77921599	77921757	158	72	51	68	50	25	53	85	74	36	112	54	32	21	112	51	63	7.79217e+07	Pdxk	TRUE	FALSE	FALSE
chr10	79243127	79243285	158	33	68	74	29	17	74	89	88	66	231	81	25	39	201	97	70	7.92432e+07	Fstl3	TRUE	FALSE	FALSE
chr10	20671925	20672082	157	189	204	223	181	120	164	250	249	188	449	193	185	160	212	187	222	2.0672e+07	Ahi1	FALSE	TRUE	FALSE
chr10	66484414	66484571	157	96	183	172	91	74	98	154	239	92	516	165	81	65	142	146	182	6.64845e+07	Reep3	FALSE	TRUE	FALSE
chr10	89211469	89211626	157	95	21	20	103	118	47	15	22	203	4	27	71	89	24	18	18	8.92115e+07	Uhrf1bp1l	FALSE	FALSE	TRUE
chr10	121142943	121143100	157	155	236	220	152	99	125	217	227	107	345	190	194	109	140	172	177	121142980	BC048403	FALSE	TRUE	FALSE
chr10	128072874	128073031	157	63	69	106	34	43	98	88	153	60	277	93	44	47	196	83	117	1.28073e+08	Ikzf4	FALSE	TRUE	FALSE
chr10	12642895	12643051	156	30	75	69	44	31	87	67	76	25	199	61	55	37	135	58	63	12642965	B230208H11Rik	TRUE	FALSE	FALSE
chr10	60889318	60889474	156	65	159	115	36	48	63	103	149	100	208	148	47	42	70	108	170	6.08894e+07	Nodal	FALSE	TRUE	FALSE
chr10	62878727	62878883	156	212	220	101	208	175	116	60	82	246	82	142	189	185	120	101	110	6.28788e+07	Ctnna3	FALSE	FALSE	TRUE
chr10	95086276	95086432	156	88	68	47	135	107	75	39	58	96	32	47	117	79	68	33	45	9.50863e+07	Nudt4	FALSE	FALSE	TRUE
chr10	96386882	96387038	156	234	111	77	266	275	129	53	78	412	56	108	243	324	117	87	76	9.63869e+07	4930556N09Rik	FALSE	FALSE	TRUE
chr10	114821840	114821996	156	37	56	69	107	44	72	83	81	27	167	66	101	62	169	73	76	1.14822e+08	Zfc3h1	TRUE	FALSE	FALSE
chr10	5864450	5864605	155	19	44	32	12	14	9	43	38	36	102	31	28	20	13	38	28	5.86455e+06	Gm221	FALSE	TRUE	FALSE
chr10	7806917	7807072	155	40	71	69	38	29	118	82	67	67	157	61	35	46	150	65	57	7.80704e+06	Tab2	TRUE	FALSE	FALSE
chr10	19824509	19824664	155	146	125	112	103	87	45	93	129	170	148	147	95	62	75	121	164	1.98246e+07	Map3k5	FALSE	FALSE	FALSE
chr10	44147825	44147980	155	60	54	87	45	40	119	93	112	67	111	67	33	45	132	72	77	4.41479e+07	Prdm1	TRUE	FALSE	FALSE
chr10	76589304	76589459	155	74	78	87	84	40	55	85	92	96	201	66	58	48	81	49	76	7.65894e+07	Col18a1	FALSE	TRUE	FALSE
chr10	79755154	79755309	155	33	28	22	54	15	22	26	30	24	115	31	50	35	97	34	25	7.97552e+07	Rps15	TRUE	FALSE	FALSE
chr10	95158708	95158863	155	76	87	74	32	11	44	79	81	117	184	69	42	34	70	55	65	95158761	Nudt4	FALSE	TRUE	FALSE
chr10	20238477	20238631	154	37	44	40	20	25	45	42	50	30	148	30	25	32	90	27	38	2.02385e+07	Pde7b	TRUE	FALSE	FALSE
chr10	21164434	21164588	154	149	183	192	163	102	234	221	220	211	432	183	133	138	356	216	172	2.11645e+07	Aldh8a1	TRUE	FALSE	FALSE
chr10	24552791	24552945	154	11	6	17	95	96	64	18	24	33	13	27	98	119	42	28	40	2.45529e+07	Enpp3	FALSE	FALSE	FALSE
chr10	30530067	30530221	154	97	139	168	180	114	71	169	201	99	280	179	139	88	144	190	202	3.05301e+07	Ncoa7	TRUE	FALSE	FALSE
chr10	39797515	39797669	154	342	321	500	253	239	195	551	620	317	629	388	232	239	268	469	361	3.97976e+07	Slc16a10	FALSE	TRUE	FALSE
chr10	68681449	68681603	154	74	63	46	83	109	41	36	45	112	38	57	76	130	42	30	46	6.86816e+07	Rhobtb1	FALSE	FALSE	TRUE
chr10	95761409	95761563	154	51	177	79	54	38	33	43	84	85	266	102	76	52	36	44	85	9.57614e+07	Btg1	FALSE	FALSE	TRUE
chr10	126703176	126703330	154	24	25	33	41	29	39	33	42	36	101	32	41	27	69	28	45	126703288	Dctn2	FALSE	TRUE	FALSE
chr10	128258672	128258826	154	130	154	193	157	98	215	274	171	84	284	110	98	100	197	113	108	1.28259e+08	Ormdl2	TRUE	FALSE	FALSE
chr10	19886750	19886903	153	275	308	383	217	145	355	500	426	206	1049	371	175	247	784	430	332	1.98868e+07	Mtap7	TRUE	FALSE	FALSE
chr10	67985069	67985222	153	44	50	68	37	50	39	80	82	36	112	65	32	39	51	67	64	6.79851e+07	1700040L02Rik	FALSE	TRUE	FALSE
chr10	68751657	68751810	153	236	285	267	200	165	156	278	315	214	477	280	146	185	263	245	266	6.87517e+07	Rhobtb1	FALSE	TRUE	FALSE
chr10	76991563	76991716	153	142	132	136	123	150	75	167	145	115	233	131	114	166	116	128	132	7.69916e+07	Itgb2	FALSE	TRUE	FALSE
chr10	88994846	88994999	153	183	199	108	156	217	100	73	117	233	86	144	110	230	103	89	150	8.89949e+07	Nr1h4	FALSE	FALSE	TRUE
chr10	50483877	50484029	152	49	3	44	248	261	118	47	67	27	7	47	139	239	69	63	45	5.04839e+07	Ascc3	FALSE	FALSE	FALSE
chr10	76904148	76904300	152	6	45	19	8	8	22	19	25	20	156	21	15	11	72	22	18	7.69042e+07	Gm17769	TRUE	FALSE	FALSE
chr10	117183472	117183624	152	93	112	120	321	54	185	140	144	66	376	151	213	65	338	164	175	1.17184e+08	Slc35e3	TRUE	FALSE	FALSE
chr10	128375596	128375748	152	31	53	40	28	21	52	28	57	13	191	44	24	26	135	31	45	1.28376e+08	Itga7	TRUE	FALSE	FALSE
chr10	39845032	39845183	151	91	99	125	127	109	87	148	152	115	146	101	90	118	74	105	126	3.98451e+07	Slc16a10	FALSE	FALSE	FALSE
chr10	68750888	68751039	151	166	73	140	96	86	103	124	200	124	180	101	58	78	128	89	127	6.8751e+07	Rhobtb1	FALSE	TRUE	FALSE
chr10	111265118	111265269	151	232	237	111	220	253	117	73	79	261	102	174	229	227	125	89	136	1.11265e+08	Krr1	FALSE	FALSE	TRUE
chr10	127019861	127020011	150	11	65	57	23	12	34	78	67	18	212	61	34	30	100	55	48	1.2702e+08	Lrp1	FALSE	TRUE	FALSE
chr10	127582137	127582287	150	25	69	52	51	32	39	53	53	31	130	56	51	62	52	53	53	1.27582e+08	Rbms2	FALSE	TRUE	FALSE
chr10	31312636	31312785	149	260	254	312	290	197	193	371	340	182	676	272	224	192	338	300	241	3.13127e+07	Rnf217	FALSE	TRUE	FALSE
chr10	70807829	70807978	149	57	67	63	58	29	66	54	81	54	114	48	48	35	110	45	63	7.08079e+07	Cisd1	TRUE	FALSE	FALSE
chr10	112391324	112391473	149	51	42	32	88	150	83	19	39	55	14	36	102	166	59	18	30	1.12391e+08	Atxn7l3b	FALSE	FALSE	FALSE
chr10	19729975	19730123	148	97	45	34	55	79	26	31	24	111	11	26	45	90	25	21	11	1.973e+07	Map3k5	FALSE	FALSE	TRUE
chr10	39679976	39680124	148	343	363	428	230	273	371	530	493	322	613	428	235	292	399	465	444	3.968e+07	G630090E17Rik	FALSE	TRUE	FALSE
chr10	94767183	94767331	148	129	83	74	48	75	85	51	71	184	37	87	51	128	54	70	93	9.47672e+07	Cradd	FALSE	FALSE	FALSE
chr10	111019776	111019924	148	130	89	63	76	94	39	41	52	176	37	69	83	103	58	42	71	1.1102e+08	4933440J02Rik	FALSE	FALSE	TRUE
chr10	120925807	120925955	148	293	285	273	174	116	111	231	312	251	504	262	154	134	140	261	231	1.20926e+08	Rassf3	FALSE	TRUE	FALSE
chr10	121823903	121824051	148	134	89	90	236	273	102	69	111	119	64	95	192	256	104	85	104	1.21824e+08	Avpr1a	FALSE	FALSE	FALSE
chr10	126365760	126365908	148	38	74	51	23	28	64	49	57	37	128	59	30	26	44	54	57	1.26366e+08	Xrcc6bp1	FALSE	TRUE	FALSE
chr10	70810145	70810292	147	73	66	77	51	29	70	87	82	52	200	66	43	53	180	56	74	7.08102e+07	Ipmk	TRUE	FALSE	FALSE
chr10	74628621	74628768	147	75	104	44	72	28	27	31	32	67	51	58	71	35	42	38	34	7.46287e+07	Bcr	FALSE	FALSE	TRUE
chr10	79347335	79347482	147	93	113	125	32	26	143	130	161	75	286	112	40	69	275	126	104	7.93474e+07	Elane	TRUE	FALSE	FALSE
chr10	79635596	79635743	147	57	77	68	105	33	54	79	81	58	306	79	101	54	247	76	70	7.96357e+07	1600002K03Rik	TRUE	FALSE	FALSE
chr10	44422030	44422176	146	311	216	293	189	146	129	289	367	339	367	274	214	168	155	268	311	4.44221e+07	Prdm1	FALSE	FALSE	FALSE
chr10	80555673	80555819	146	39	51	65	45	36	27	58	84	47	140	54	40	32	43	49	62	8.05557e+07	Creb3l3	FALSE	TRUE	FALSE
chr10	95236280	95236426	146	297	441	454	269	202	281	548	510	261	792	417	244	211	397	436	394	9.52364e+07	Eea1	FALSE	TRUE	FALSE
chr10	23571174	23571319	145	163	276	68	94	86	59	31	41	183	85	99	84	100	43	32	30	2.35712e+07	Vnn3	FALSE	FALSE	TRUE
chr10	41997895	41998040	145	165	308	259	745	131	254	349	271	241	908	258	405	152	669	259	345	4.1998e+07	Foxo3	FALSE	TRUE	FALSE
chr10	62041130	62041275	145	23	71	86	262	46	80	114	95	20	204	77	126	55	198	77	75	6.20412e+07	2510003E04Rik	TRUE	FALSE	FALSE
chr10	68703431	68703576	145	176	188	129	120	187	74	120	129	165	171	141	100	144	80	117	131	6.87035e+07	Rhobtb1	FALSE	TRUE	FALSE
chr10	80023479	80023624	145	124	101	125	70	46	48	135	152	149	293	123	55	48	48	120	103	8.00235e+07	Rexo1	FALSE	TRUE	FALSE
chr10	80084815	80084960	145	135	292	356	968	205	280	496	399	85	1030	292	428	212	868	326	300	8.00849e+07	Csnk1g2	TRUE	FALSE	FALSE
chr10	62830873	62831016	143	142	143	90	40	54	30	49	81	228	170	109	49	75	55	86	96	6.28309e+07	Dnajc12	FALSE	FALSE	FALSE
chr10	68334936	68335079	143	82	73	32	38	89	51	6	25	121	28	52	55	81	46	20	29	6.8335e+07	Tmem26	FALSE	FALSE	TRUE
chr10	79264966	79265109	143	58	31	57	54	20	92	71	66	73	97	59	39	26	149	72	56	7.9265e+07	Palm	TRUE	FALSE	FALSE
chr10	87947345	87947488	143	12	14	19	103	97	49	31	20	31	7	21	88	79	67	21	15	8.79474e+07	Chpt1	FALSE	FALSE	FALSE
chr10	94880592	94880735	143	93	65	75	50	44	151	73	86	84	158	69	53	81	147	79	70	9.48807e+07	5730420D15Rik	TRUE	FALSE	FALSE
chr10	124761478	124761621	143	49	72	87	35	51	125	77	101	98	120	70	43	69	138	46	92	1.24762e+08	Slc16a7	TRUE	FALSE	FALSE
chr10	127472601	127472744	143	14	54	36	64	15	51	31	57	14	147	41	50	17	103	31	51	1.27473e+08	Naca	TRUE	FALSE	FALSE
chr10	12366034	12366176	142	93	56	54	112	142	102	49	64	71	54	72	90	131	80	65	89	12366112	Utrn	FALSE	FALSE	FALSE
chr10	79624560	79624702	142	187	181	208	252	228	146	265	225	191	303	201	146	162	287	216	217	7.96246e+07	Cirbp	TRUE	FALSE	FALSE
chr10	116849686	116849827	141	357	267	117	211	204	71	69	83	305	98	168	286	193	97	93	72	1.1685e+08	Cpsf6	FALSE	FALSE	TRUE
chr10	127639055	127639196	141	100	214	211	112	78	208	240	256	162	669	195	116	159	536	183	202	1.27639e+08	Gls2	TRUE	FALSE	FALSE
chr10	53762374	53762514	140	95	59	55	149	188	98	63	52	107	23	58	121	178	120	59	54	5.37624e+07	Man1a	FALSE	FALSE	FALSE
chr10	66559961	66560100	139	26	71	46	115	26	50	61	48	44	200	46	90	30	142	44	53	6.656e+07	Reep3	TRUE	FALSE	FALSE
chr10	25339638	25339776	138	88	118	80	64	46	50	71	96	114	133	95	71	43	58	78	97	2.53397e+07	2010003K15Rik	FALSE	TRUE	FALSE
chr10	40602785	40602923	138	19	35	29	20	21	34	25	42	0	133	19	19	36	75	17	24	4.06028e+07	Cdc40	TRUE	FALSE	FALSE
chr10	128376134	128376272	138	55	105	123	76	65	121	140	153	67	333	154	100	84	236	154	156	1.28376e+08	Itga7	FALSE	TRUE	FALSE
chr10	7591535	7591672	137	60	66	57	24	43	11	47	74	100	158	65	38	37	31	42	82	7.5916e+06	Mir5104	FALSE	TRUE	FALSE
chr10	12192308	12192445	137	12	2	46	122	222	144	43	74	16	1	49	160	220	66	59	66	1.21924e+07	Utrn	FALSE	FALSE	FALSE
chr10	79794504	79794641	137	338	340	441	202	109	379	560	464	329	675	384	179	170	555	463	370	7.97946e+07	Reep6	TRUE	FALSE	FALSE
chr10	89026906	89027043	137	97	81	42	97	130	70	28	39	128	22	75	67	168	69	60	57	8.9027e+07	Nr1h4	FALSE	FALSE	TRUE
chr10	70807484	70807620	136	41	58	40	155	16	57	42	48	27	214	62	119	35	177	64	68	7.08076e+07	Cisd1	TRUE	FALSE	FALSE
chr10	77645164	77645300	136	99	105	142	50	90	122	183	157	146	115	141	40	80	165	155	169	7.76452e+07	Pwp2	FALSE	TRUE	FALSE
chr10	68201867	68202002	135	99	102	58	90	118	22	56	48	83	45	74	82	115	53	36	75	68201911	Tmem26	FALSE	FALSE	TRUE
chr10	80451054	80451189	135	31	91	30	27	27	52	25	30	33	119	40	35	18	38	33	21	8.04512e+07	Gng7	FALSE	FALSE	TRUE
chr10	92659025	92659160	135	5	0	22	81	119	93	27	32	0	3	28	45	104	30	42	26	9.26591e+07	Cdk17	FALSE	FALSE	FALSE
chr10	79563583	79563715	132	16	56	42	22	14	58	37	58	16	150	42	18	18	75	35	55	7.95636e+07	Sbno2	FALSE	TRUE	FALSE
chr10	90640181	90640313	132	51	88	46	80	95	51	29	51	68	34	82	96	97	97	53	103	9.06402e+07	Tmpo	FALSE	FALSE	FALSE
chr10	126789401	126789533	132	261	242	346	150	90	379	370	428	324	546	294	155	246	738	311	333	1.26789e+08	Inhbe	TRUE	FALSE	FALSE
chr10	20766591	20766722	131	83	111	38	73	85	44	18	43	101	65	50	77	61	42	26	64	2.07667e+07	Ahi1	FALSE	FALSE	FALSE
chr10	53793695	53793826	131	92	119	94	76	49	31	81	104	150	192	100	65	62	79	88	104	5.37937e+07	Man1a	FALSE	TRUE	FALSE
chr10	95142981	95143112	131	127	90	68	43	40	24	61	74	224	107	96	41	49	22	84	88	9.51431e+07	Nudt4	FALSE	FALSE	FALSE
chr10	124758631	124758762	131	102	105	151	71	64	30	152	207	176	203	119	55	52	42	138	118	124758712	Slc16a7	FALSE	TRUE	FALSE
chr10	58615344	58615474	130	154	118	213	134	115	151	230	257	125	280	178	109	142	314	205	197	5.86155e+07	Sept10	TRUE	FALSE	FALSE
chr10	62538139	62538269	130	111	26	23	28	46	21	11	21	173	5	25	32	51	16	11	19	6.25382e+07	Pbld1	FALSE	FALSE	TRUE
chr10	89214013	89214143	130	106	58	68	67	73	29	53	80	117	40	58	59	77	41	45	49	8.9214e+07	Uhrf1bp1l	FALSE	FALSE	FALSE
chr10	118597346	118597476	130	106	89	42	64	135	44	26	34	148	18	54	79	129	31	22	45	1.18597e+08	1700064J06Rik	FALSE	FALSE	TRUE
chr10	7512624	7512753	129	23	49	28	120	21	53	33	32	13	167	34	68	27	111	30	39	7.51268e+06	Ppil4	TRUE	FALSE	FALSE
chr10	74508717	74508846	129	269	336	390	183	102	230	457	435	322	564	403	141	128	309	379	388	7.45088e+07	Rab36	FALSE	TRUE	FALSE
chr10	110153941	110154070	129	57	52	31	106	47	52	24	29	54	29	46	74	32	51	46	21	1.10154e+08	E2f7	FALSE	FALSE	TRUE
chr10	40232094	40232222	128	375	257	106	175	222	124	61	70	484	50	157	202	384	75	73	46	4.02322e+07	Slc22a16	FALSE	FALSE	TRUE
chr10	89028184	89028312	128	72	153	84	79	79	77	77	80	135	140	110	86	139	89	94	92	8.90283e+07	Nr1h4	FALSE	FALSE	TRUE
chr10	17196515	17196642	127	21	132	79	23	15	34	39	72	50	208	95	41	17	31	45	80	1.71966e+07	Cited2	FALSE	TRUE	FALSE
chr10	87058009	87058136	127	75	22	16	30	95	50	9	19	67	3	23	38	111	24	21	23	8.7058e+07	Pah	FALSE	FALSE	TRUE
chr10	18265702	18265828	126	29	39	35	40	20	28	33	47	13	161	46	43	17	161	57	46	1.82658e+07	Hebp2	TRUE	FALSE	FALSE
chr10	58615494	58615619	125	170	125	212	134	116	151	229	250	136	266	179	106	143	309	205	194	5.86155e+07	Sept10	TRUE	FALSE	FALSE
chr10	41627485	41627605	120	5	36	3	7	11	17	3	2	6	378	4	5	0	8	7	6	4.16275e+07	Sesn1	FALSE	TRUE	FALSE
chr10	75296950	75297066	116	11	22	21	14	8	15	17	25	4	110	23	14	8	70	28	11	7.5297e+07	Gstt2	TRUE	FALSE	FALSE
chr10	25037693	25037808	115	80	22	26	37	66	32	11	30	101	11	30	50	91	30	22	36	2.50377e+07	Akap7	FALSE	FALSE	TRUE
chr10	53794214	53794329	115	29	33	50	18	15	48	47	49	37	110	49	30	27	119	38	76	5.37943e+07	Man1a	TRUE	FALSE	FALSE
chr10	110909144	110909259	115	28	23	26	106	104	41	21	22	27	12	32	69	94	46	23	32	1.10909e+08	Nap1l1	FALSE	FALSE	FALSE
chr10	47372338	47372452	114	3	4	16	60	125	46	28	15	3	5	20	41	110	52	30	21	4.73723e+07	D030045P18Rik	FALSE	FALSE	FALSE
chr10	84639587	84639701	114	62	36	16	64	100	36	17	12	103	19	32	61	64	33	19	18	8.46396e+07	Cry1	FALSE	FALSE	TRUE
chr10	80809610	80809723	113	2	26	16	68	12	14	17	17	0	116	18	54	18	58	17	15	8.08097e+07	Hmg20b	TRUE	FALSE	FALSE
chr10	40232244	40232356	112	325	223	95	145	208	122	55	60	390	39	143	174	376	62	61	45	4.02322e+07	Slc22a16	FALSE	FALSE	TRUE
chr10	95540179	95540291	112	57	24	60	413	177	201	81	63	55	24	73	396	164	187	102	57	9.55402e+07	Eea1	FALSE	FALSE	FALSE
chr10	58615231	58615335	104	67	59	101	95	57	76	107	123	68	145	73	70	74	177	80	92	5.86153e+07	Sept10	TRUE	FALSE	FALSE
chr10	17954707	17954807	100	29	31	59	23	28	48	63	73	49	94	47	18	33	105	46	51	1.79547e+07	Ccdc28a	TRUE	FALSE	FALSE
chr10	19797003	19797103	100	134	111	33	58	34	25	13	21	127	33	48	55	37	23	23	17	1.97971e+07	Map3k5	FALSE	FALSE	TRUE
chr10	41607281	41607381	100	4	19	3	7	1	5	3	7	0	878	3	7	1	8	3	3	4.16073e+07	Sesn1	FALSE	TRUE	FALSE
chr10	41922641	41922741	100	68	83	85	59	50	99	83	115	84	167	83	80	62	156	80	82	4.19226e+07	Foxo3	TRUE	FALSE	FALSE
chr10	57020888	57020988	100	62	6	25	65	109	57	23	35	58	5	25	42	138	40	28	29	5.70209e+07	4930467K11Rik	FALSE	FALSE	FALSE
chr10	66560111	66560211	100	17	40	32	69	21	40	40	36	34	122	31	57	19	87	31	35	66560111	Reep3	TRUE	FALSE	FALSE
chr10	76552618	76552718	100	24	29	28	11	8	19	30	30	27	108	22	10	23	52	21	22	7.65526e+07	Col18a1	TRUE	FALSE	FALSE
chr10	80451211	80451311	100	30	94	32	22	11	48	24	31	34	138	40	24	13	40	33	23	8.04512e+07	Gng7	FALSE	FALSE	TRUE
chr10	80555101	80555201	100	11	30	22	30	3	17	35	25	21	130	32	28	11	84	37	28	8.05552e+07	Creb3l3	TRUE	FALSE	FALSE
chr10	84039880	84039980	100	21	24	27	80	16	29	31	34	7	103	26	68	22	62	24	40	8.40399e+07	Tcp11l2	TRUE	FALSE	FALSE
chr10	87181475	87181575	100	81	71	45	58	92	48	23	33	92	28	49	83	110	51	26	55	8.71815e+07	Igf1	FALSE	FALSE	TRUE
chr10	87820064	87820164	100	34	46	41	122	16	56	48	51	31	167	49	63	42	112	54	62	8.78201e+07	Dram1	TRUE	FALSE	FALSE
chr10	89026785	89026885	100	72	51	28	60	93	48	19	23	84	12	48	48	121	30	41	32	8.90269e+07	Nr1h4	FALSE	FALSE	TRUE
chr10	95299372	95299472	100	76	85	74	95	67	46	69	94	137	145	87	73	51	67	77	102	9.52994e+07	Eea1	FALSE	TRUE	FALSE
chr10	127008561	127008661	100	15	58	57	34	32	74	66	81	31	130	58	34	36	149	54	77	1.27009e+08	Lrp1	TRUE	FALSE	FALSE
chr10	128417594	128417694	100	6	32	20	12	3	23	26	23	13	157	31	10	18	42	23	19	1.28418e+08	Olfr9	FALSE	TRUE	FALSE
chr10	128417926	128418026	100	21	61	37	27	15	38	40	41	12	187	52	43	28	60	16	40	1.28418e+08	Olfr9	TRUE	FALSE	FALSE
chr11	115157635	115158047	412	57	47	52	39	28	66	59	72	78	157	61	44	65	162	66	62	1.15158e+08	Fads6	TRUE	FALSE	FALSE
chr11	19863550	19863928	378	34	51	46	42	43	73	41	63	48	186	58	44	36	140	46	61	1.98638e+07	Spred2	TRUE	FALSE	FALSE
chr11	29514400	29514775	375	81	60	34	51	97	57	17	38	119	24	45	63	126	41	23	36	2.95146e+07	Rps27a	FALSE	FALSE	TRUE
chr11	98826193	98826566	373	80	87	107	41	32	126	85	147	99	248	93	57	60	179	74	103	9.88264e+07	Rara	TRUE	FALSE	FALSE
chr11	119081176	119081545	369	65	90	72	55	34	87	83	98	74	234	88	71	69	169	75	110	1.19081e+08	Tbc1d16	TRUE	FALSE	FALSE
chr11	35763520	35763876	356	76	83	40	71	91	31	26	45	146	56	67	63	80	47	54	76	3.57637e+07	Wwc1	FALSE	FALSE	TRUE
chr11	12132380	12132733	353	25	34	42	12	19	23	49	52	30	103	50	19	34	117	58	51	1.21325e+07	Grb10	TRUE	FALSE	FALSE
chr11	5402435	5402781	346	565	417	538	594	662	564	565	525	433	505	478	580	678	822	443	549	5.4026e+06	Xbp1	FALSE	FALSE	FALSE
chr11	69804793	69805134	341	16	71	46	39	25	53	53	60	28	203	47	41	41	156	35	48	6.9805e+07	Gabarap	TRUE	FALSE	FALSE
chr11	31646628	31646962	334	77	41	54	29	46	44	41	79	69	111	52	36	41	54	44	60	3.16468e+07	Bod1	FALSE	TRUE	FALSE
chr11	106430551	106430876	325	43	38	47	48	25	29	45	65	10	107	34	24	22	50	23	50	1.06431e+08	Tex2	TRUE	FALSE	FALSE
chr11	119808783	119809097	314	63	85	81	53	56	34	55	120	46	145	94	48	48	62	81	105	1.19809e+08	Baiap2	FALSE	TRUE	FALSE
chr11	121296020	121296334	314	47	80	68	116	31	52	87	85	36	297	65	78	41	208	66	66	1.21296e+08	Fn3k	TRUE	FALSE	FALSE
chr11	77851841	77852154	313	56	107	78	45	36	121	91	77	29	247	72	42	28	133	64	57	7.78519e+07	Flot2	FALSE	TRUE	FALSE
chr11	78312244	78312555	311	33	111	32	35	49	17	22	31	29	79	40	48	45	42	29	47	7.83125e+07	Vtn	FALSE	TRUE	FALSE
chr11	43763853	43764163	310	82	147	78	73	71	39	41	98	151	126	99	88	125	63	57	125	4.3764e+07	Adra1b	FALSE	FALSE	TRUE
chr11	94021744	94022053	309	32	73	67	25	19	96	66	92	41	215	71	27	35	185	69	70	9.40219e+07	Tob1	TRUE	FALSE	FALSE
chr11	37888802	37889107	305	108	57	38	64	121	42	34	35	109	37	53	63	119	43	26	67	3.78889e+07	Gm12130	FALSE	FALSE	TRUE
chr11	7094544	7094848	304	118	155	139	83	92	81	129	167	107	190	140	83	104	119	113	130	7.09472e+06	Igfbp1	FALSE	TRUE	FALSE
chr11	120333535	120333837	302	9	53	54	19	15	69	60	71	27	203	63	17	38	128	47	75	1.20334e+08	Hgs	FALSE	TRUE	FALSE
chr11	20296061	20296358	297	28	46	45	17	26	62	44	57	15	142	65	34	32	76	51	66	20296252	Gm12034	FALSE	TRUE	FALSE
chr11	20729245	20729540	295	77	68	41	46	42	28	33	51	118	52	45	35	41	24	38	53	2.07294e+07	1110067D22Rik	FALSE	FALSE	FALSE
chr11	106971046	106971340	294	123	152	80	41	52	33	82	61	155	66	83	42	38	24	46	57	1.06971e+08	Bptf	FALSE	FALSE	TRUE
chr11	98447385	98447678	293	133	86	61	82	97	40	25	38	181	51	75	89	97	38	32	84	9.84476e+07	Ormdl3	FALSE	FALSE	TRUE
chr11	69808900	69809192	292	25	32	37	19	7	39	39	44	47	134	49	24	27	131	50	47	6.98091e+07	Phf23	TRUE	FALSE	FALSE
chr11	69039483	69039768	285	39	58	96	65	33	100	91	113	43	215	110	74	39	246	107	95	6.90397e+07	Gucy2e	TRUE	FALSE	FALSE
chr11	95639081	95639360	279	44	98	85	49	68	52	98	96	91	161	93	64	96	86	116	101	95639288	Zfp652	FALSE	TRUE	FALSE
chr11	7052380	7052658	278	22	86	62	28	34	66	63	66	27	239	62	25	46	134	61	61	7052521	Adcy1	TRUE	FALSE	FALSE
chr11	69733224	69733502	278	17	46	44	18	12	42	62	38	39	107	42	26	23	83	51	28	6.97333e+07	Eif5a	FALSE	TRUE	FALSE
chr11	7051871	7052147	276	39	64	68	46	35	41	91	63	25	198	61	43	47	101	78	47	7.05204e+06	Adcy1	FALSE	TRUE	FALSE
chr11	94208560	94208836	276	126	117	85	82	63	53	49	72	157	118	103	93	76	57	55	107	9.42086e+07	Abcc3	FALSE	FALSE	FALSE
chr11	95544322	95544597	275	38	60	65	34	40	17	75	70	65	127	72	40	31	61	69	66	9.55445e+07	Phb	FALSE	TRUE	FALSE
chr11	101225780	101226055	275	50	53	57	40	56	94	45	87	56	119	52	30	60	117	39	74	1.01226e+08	G6pc	TRUE	FALSE	FALSE
chr11	117819502	117819777	275	39	100	50	23	20	73	50	60	19	244	65	22	38	106	52	64	1.1782e+08	Socs3	FALSE	TRUE	FALSE
chr11	49903371	49903644	273	115	86	32	51	121	56	18	34	115	34	55	60	106	53	33	38	4.99035e+07	Rnf130	FALSE	FALSE	TRUE
chr11	79698361	79698633	272	48	45	31	42	44	30	21	35	32	101	37	55	47	40	27	34	7.96985e+07	Utp6	FALSE	TRUE	FALSE
chr11	100414230	100414502	272	26	49	56	24	28	47	43	73	39	140	53	29	21	85	42	64	1.00414e+08	Ttc25	FALSE	TRUE	FALSE
chr11	60693100	60693371	271	143	118	81	83	106	41	63	88	172	108	100	89	96	74	72	103	6.06932e+07	Tmem11	FALSE	FALSE	FALSE
chr11	117821056	117821327	271	35	60	62	41	38	28	67	71	33	126	59	39	80	50	49	61	1.17821e+08	Socs3	FALSE	TRUE	FALSE
chr11	19893040	19893310	270	94	105	87	76	93	117	53	88	97	41	80	74	104	117	43	78	1.98932e+07	Spred2	FALSE	FALSE	FALSE
chr11	75374196	75374466	270	43	93	72	70	75	51	76	71	53	127	80	46	61	61	62	72	7.53743e+07	Slc43a2	FALSE	TRUE	FALSE
chr11	103274019	103274289	270	53	56	51	68	39	72	58	50	53	124	54	66	41	116	41	73	1.03274e+08	Plekhm1	TRUE	FALSE	FALSE
chr11	45702190	45702459	269	79	88	89	30	50	49	94	105	86	91	96	34	57	47	103	91	45702372	Clint1	FALSE	TRUE	FALSE
chr11	8469309	8469577	268	32	71	58	38	25	19	59	57	34	104	72	35	29	38	61	74	8.46944e+06	Tns3	FALSE	TRUE	FALSE
chr11	29618603	29618871	268	72	78	36	28	64	39	21	30	140	65	52	42	69	28	27	63	2.96187e+07	Rtn4	FALSE	FALSE	TRUE
chr11	87666533	87666800	267	39	120	103	332	65	90	107	138	36	503	136	267	126	398	123	152	8.76667e+07	Mks1	TRUE	FALSE	FALSE
chr11	60637200	60637466	266	224	192	72	101	213	139	53	69	325	55	83	118	239	112	53	51	6.06373e+07	Dhrs7b	FALSE	FALSE	TRUE
chr11	117831633	117831899	266	84	103	90	52	79	51	90	96	83	143	97	68	48	57	92	101	1.17832e+08	Socs3	FALSE	TRUE	FALSE
chr11	3931250	3931515	265	54	97	95	46	48	94	94	120	83	195	107	66	52	178	115	126	3.93134e+06	Sec14l4	TRUE	FALSE	FALSE
chr11	86196110	86196375	265	88	65	55	26	62	41	39	80	123	57	65	47	85	30	61	59	8.61962e+07	Med13	FALSE	FALSE	FALSE
chr11	21263687	21263951	264	42	14	15	53	81	36	12	15	57	8	15	51	103	23	13	17	2.12638e+07	Ugp2	FALSE	FALSE	TRUE
chr11	49960760	49961023	263	144	114	172	46	93	92	246	199	88	204	152	34	78	130	200	139	4.99609e+07	Tbc1d9b	FALSE	TRUE	FALSE
chr11	113026780	113027043	263	49	66	44	26	18	71	44	54	28	194	53	37	31	77	47	34	1.13027e+08	2610035D17Rik	FALSE	TRUE	FALSE
chr11	78024249	78024511	262	39	115	52	41	40	25	51	64	40	141	63	37	48	46	45	70	7.80244e+07	Supt6h	FALSE	TRUE	FALSE
chr11	106985770	106986031	261	65	96	99	45	37	61	122	97	86	364	93	48	64	179	92	76	106985918	Bptf	FALSE	TRUE	FALSE
chr11	6167710	6167969	259	36	71	77	49	38	100	106	74	25	184	74	59	45	230	80	73	6.16786e+06	Ddx56	TRUE	FALSE	FALSE
chr11	102348065	102348324	259	110	119	93	126	109	83	65	104	124	71	89	88	83	69	56	97	1.02348e+08	Gpatch8	FALSE	FALSE	TRUE
chr11	109550890	109551149	259	115	31	29	108	115	44	29	22	86	13	34	102	102	41	21	26	1.09551e+08	Fam20a	FALSE	FALSE	TRUE
chr11	109194205	109194463	258	93	60	70	36	33	48	41	71	129	52	54	28	58	47	40	66	1.09194e+08	1700096J18Rik	FALSE	FALSE	FALSE
chr11	70338341	70338598	257	111	40	32	101	65	39	27	30	110	13	39	66	36	50	31	28	7.03385e+07	Psmb6	FALSE	FALSE	TRUE
chr11	19861138	19861394	256	63	175	76	30	33	50	74	50	100	137	105	40	43	37	59	77	1.98613e+07	Spred2	FALSE	TRUE	FALSE
chr11	69608973	69609229	256	10	34	29	82	20	41	35	33	35	129	38	62	34	153	35	46	6.96091e+07	Chrnb1	TRUE	FALSE	FALSE
chr11	112669250	112669506	256	77	74	94	62	63	63	64	114	107	66	102	87	56	87	63	114	1.12669e+08	Sox9	FALSE	FALSE	FALSE
chr11	120091809	120092065	256	71	51	88	32	39	114	108	98	67	171	77	33	39	189	76	93	1.20092e+08	Bahcc1	TRUE	FALSE	FALSE
chr11	69231052	69231307	255	27	38	35	38	33	36	33	50	47	152	32	24	32	99	36	30	6.92312e+07	Kdm6b	TRUE	FALSE	FALSE
chr11	109958869	109959124	255	78	17	54	311	215	150	51	78	55	35	65	199	230	102	78	78	1.09959e+08	Abca8a	FALSE	FALSE	FALSE
chr11	3046117	3046371	254	64	93	131	54	45	107	183	137	61	200	94	60	34	164	106	111	3.04621e+06	Sfi1	TRUE	FALSE	FALSE
chr11	105766931	105767185	254	37	35	29	71	95	53	21	28	54	24	30	70	102	54	21	21	1.05767e+08	Tanc2	FALSE	FALSE	TRUE
chr11	119077750	119078004	254	54	44	59	46	25	45	57	84	63	113	56	37	51	63	57	64	1.19078e+08	Tbc1d16	TRUE	FALSE	FALSE
chr11	72989195	72989448	253	124	102	83	92	71	38	77	103	89	122	86	63	62	57	73	76	7.29893e+07	Tmem93	FALSE	FALSE	FALSE
chr11	53599927	53600179	252	41	91	67	75	39	76	66	78	48	170	64	50	34	132	57	70	5.36e+07	Gm12216	TRUE	FALSE	FALSE
chr11	61192225	61192477	252	109	110	85	135	104	99	51	104	120	85	105	106	101	74	64	137	6.11924e+07	Slc47a1	FALSE	FALSE	TRUE
chr11	102269143	102269395	252	50	53	75	15	21	81	66	110	64	91	58	30	66	118	59	69	1.02269e+08	Slc25a39	TRUE	FALSE	FALSE
chr11	84684593	84684844	251	52	79	100	77	31	66	69	133	119	167	82	74	50	103	63	99	8.46847e+07	Ggnbp2	TRUE	FALSE	FALSE
chr11	117709137	117709388	251	86	56	47	55	54	74	42	41	177	19	49	46	59	66	42	49	1.17709e+08	Birc5	FALSE	FALSE	FALSE
chr11	16601852	16602102	250	116	84	70	183	160	106	52	89	115	40	83	166	181	91	58	68	1.6602e+07	Egfr	FALSE	FALSE	FALSE
chr11	110241291	110241541	250	38	68	49	33	34	50	45	72	47	110	53	45	38	60	38	66	1.10241e+08	Map2k6	FALSE	TRUE	FALSE
chr11	5921004	5921253	249	27	39	55	15	11	39	50	84	47	162	48	9	18	89	40	62	5.92116e+06	Camk2b	TRUE	FALSE	FALSE
chr11	6174797	6175046	249	52	138	109	224	82	124	137	131	50	548	130	165	114	386	116	131	6.17488e+06	Tmed4	TRUE	FALSE	FALSE
chr11	102282859	102283108	249	94	149	170	72	78	198	169	208	98	406	171	87	107	330	177	164	1.02283e+08	Grn	TRUE	FALSE	FALSE
chr11	20355107	20355355	248	20	34	44	69	28	58	49	58	33	106	34	49	36	109	36	42	20355208	Gm12034	TRUE	FALSE	FALSE
chr11	89864753	89865001	248	70	53	32	95	108	71	33	31	116	31	45	94	114	69	40	36	8.98649e+07	Pctp	FALSE	FALSE	TRUE
chr11	119129043	119129291	248	92	144	104	114	80	134	120	131	103	269	121	126	107	274	121	122	1.19129e+08	Gaa	TRUE	FALSE	FALSE
chr11	69209650	69209897	247	68	66	76	96	52	51	73	92	88	299	88	73	57	151	94	88	6.92097e+07	Lsmd1	TRUE	FALSE	FALSE
chr11	116477060	116477307	247	38	63	65	17	17	93	79	53	40	135	61	22	17	92	67	53	1.16477e+08	Rhbdf2	TRUE	FALSE	FALSE
chr11	29507576	29507822	246	80	80	52	71	76	57	39	71	85	97	78	99	110	71	64	73	2.95077e+07	Rps27a	FALSE	FALSE	TRUE
chr11	69813860	69814106	246	54	99	77	83	24	63	111	83	86	357	75	91	38	190	82	63	69813985	Dvl2	TRUE	FALSE	FALSE
chr11	99002951	99003197	246	266	238	348	215	135	347	412	401	227	434	323	230	274	548	355	351	9.90031e+07	Ccr7	TRUE	FALSE	FALSE
chr11	51502538	51502783	245	14	38	31	23	15	66	42	26	18	77	42	35	41	107	49	36	5.15026e+07	0610009B22Rik	TRUE	FALSE	FALSE
chr11	75255146	75255391	245	5	40	35	12	14	47	49	41	13	117	36	18	44	116	36	37	7.52553e+07	Serpinf2	TRUE	FALSE	FALSE
chr11	60038190	60038433	243	70	90	94	51	47	115	85	105	91	102	83	58	64	120	67	103	6.00383e+07	Srebf1	TRUE	FALSE	FALSE
chr11	89862115	89862358	243	181	217	93	175	167	85	79	102	163	119	133	128	160	155	94	95	8.98623e+07	Pctp	FALSE	FALSE	FALSE
chr11	116543970	116544213	243	111	129	151	62	112	121	158	177	95	155	156	65	108	115	158	219	1.16544e+08	St6galnac2	FALSE	TRUE	FALSE
chr11	116944839	116945082	243	297	250	335	234	121	129	403	365	196	460	249	139	107	173	278	252	1.16945e+08	2810008D09Rik	FALSE	TRUE	FALSE
chr11	65567866	65568108	242	117	78	33	79	51	36	17	24	130	42	55	105	48	77	27	42	6.55679e+07	Map2k4	FALSE	FALSE	TRUE
chr11	98670841	98671083	242	25	47	36	51	15	31	48	34	31	118	31	56	20	109	33	34	9.8671e+07	Casc3	TRUE	FALSE	FALSE
chr11	85343025	85343266	241	59	101	48	59	25	66	45	57	40	102	75	53	27	35	64	48	8.53432e+07	Bcas3	FALSE	TRUE	FALSE
chr11	86400825	86401066	241	49	61	62	47	16	31	55	52	110	55	74	48	41	35	72	68	8.64009e+07	Vmp1	FALSE	FALSE	FALSE
chr11	87236602	87236843	241	127	56	20	62	41	22	25	11	88	7	32	44	31	23	16	14	8.72367e+07	Tex14	FALSE	FALSE	FALSE
chr11	115105204	115105445	241	17	26	46	17	21	53	47	63	31	168	45	16	31	137	34	39	1.15105e+08	Tmem104	TRUE	FALSE	FALSE
chr11	26287099	26287339	240	73	114	121	137	93	147	178	128	88	333	118	86	104	314	117	124	2.62872e+07	Fancl	TRUE	FALSE	FALSE
chr11	35733421	35733661	240	109	70	116	42	49	71	130	131	121	78	94	45	48	56	85	118	3.57335e+07	Wwc1	FALSE	TRUE	FALSE
chr11	112593412	112593652	240	84	129	63	133	159	107	48	66	118	89	82	135	149	100	48	59	1.12594e+08	BC006965	FALSE	FALSE	TRUE
chr11	85606385	85606624	239	19	22	28	35	30	57	39	32	14	72	28	34	52	120	24	26	8.56065e+07	Bcas3	TRUE	FALSE	FALSE
chr11	17551455	17551693	238	64	46	34	108	150	74	26	35	70	19	50	94	142	52	45	45	1.75516e+07	Etaa1	FALSE	FALSE	FALSE
chr11	60749272	60749509	237	77	58	61	37	40	86	61	78	67	127	63	37	52	131	55	62	6.07494e+07	Map2k3	TRUE	FALSE	FALSE
chr11	78349619	78349856	237	29	53	36	55	14	39	31	55	17	182	44	59	34	107	36	53	7.83497e+07	Tnfaip1	TRUE	FALSE	FALSE
chr11	59848652	59848888	236	73	182	171	84	104	129	168	210	106	226	176	87	98	164	151	185	5.98488e+07	Pemt	FALSE	TRUE	FALSE
chr11	94410536	94410772	236	27	35	36	48	15	56	37	41	20	108	40	35	28	145	38	43	9.44106e+07	Rsad1	TRUE	FALSE	FALSE
chr11	101561722	101561958	236	22	78	33	18	23	32	29	47	25	142	40	22	18	15	32	34	1.01562e+08	Dhx8	FALSE	TRUE	FALSE
chr11	4011963	4012198	235	59	61	86	49	62	103	90	111	148	167	75	45	55	169	77	84	4.01208e+06	Sec14l2	TRUE	FALSE	FALSE
chr11	4574733	4574968	235	41	50	94	73	38	53	99	118	56	185	89	68	52	151	91	104	4.57482e+06	Ascc2	TRUE	FALSE	FALSE
chr11	105945313	105945548	235	41	53	57	173	40	79	61	65	31	214	75	141	44	234	78	80	1.05945e+08	Map3k3	TRUE	FALSE	FALSE
chr11	117691836	117692071	235	51	71	72	44	56	71	90	76	88	150	80	60	77	97	88	84	1.17692e+08	Afmid	FALSE	TRUE	FALSE
chr11	119135904	119136139	235	25	37	37	24	11	36	57	32	6	77	33	14	27	114	43	20	1.19136e+08	Gaa	TRUE	FALSE	FALSE
chr11	45758528	45758762	234	21	29	32	143	12	45	40	31	23	106	26	68	36	108	21	24	4.57586e+07	Lsm11	TRUE	FALSE	FALSE
chr11	51687803	51688037	234	24	104	60	27	15	97	67	68	24	326	68	30	46	151	59	51	5.16879e+07	Phf15	TRUE	FALSE	FALSE
chr11	70512636	70512870	234	142	135	65	126	118	67	51	68	193	71	83	154	142	76	47	95	7.05128e+07	Inca1	FALSE	FALSE	TRUE
chr11	75300151	75300385	234	47	72	83	78	48	107	118	72	32	229	77	90	75	173	80	47	7.53003e+07	Prpf8	TRUE	FALSE	FALSE
chr11	79374117	79374351	234	128	144	95	117	183	114	61	68	88	80	119	100	191	90	46	110	7.93742e+07	Nf1	FALSE	FALSE	TRUE
chr11	83982369	83982603	234	56	105	48	72	94	52	30	45	129	38	73	82	73	29	43	72	8.39825e+07	Gm11437	FALSE	FALSE	FALSE
chr11	94033108	94033342	234	28	58	34	9	8	56	27	44	24	167	30	11	12	69	30	32	9.40332e+07	Tob1	TRUE	FALSE	FALSE
chr11	102291393	102291627	234	35	50	51	25	20	66	60	65	27	160	48	35	30	116	54	49	1.02292e+08	Grn	TRUE	FALSE	FALSE
chr11	120045623	120045856	233	65	78	91	48	38	84	85	105	75	333	69	42	38	164	67	80	1.20046e+08	2810410L24Rik	TRUE	FALSE	FALSE
chr11	101240390	101240622	232	237	222	285	81	97	190	292	359	254	695	251	81	122	374	231	262	101240532	G6pc	TRUE	FALSE	FALSE
chr11	5170162	5170393	231	83	100	102	206	169	86	94	91	61	83	125	180	153	111	102	110	5.17029e+06	Kremen1	FALSE	FALSE	FALSE
chr11	77795236	77795467	231	39	51	68	91	71	61	79	76	55	79	69	103	68	70	79	74	7.77953e+07	Phf12	FALSE	TRUE	FALSE
chr11	79532620	79532850	230	157	128	99	143	150	114	75	85	169	91	112	138	173	90	95	97	79532722	Mir365-2	FALSE	FALSE	TRUE
chr11	95274056	95274286	230	88	146	106	42	34	101	112	127	82	283	109	38	72	176	87	126	9.52741e+07	Spop	TRUE	FALSE	FALSE
chr11	118588548	118588778	230	77	67	67	36	29	97	54	77	61	58	60	34	75	108	46	61	1.18589e+08	Rbfox3	TRUE	FALSE	FALSE
chr11	118943605	118943835	230	139	132	154	87	47	113	172	182	167	290	137	73	86	211	173	129	1.18944e+08	Cbx4	FALSE	TRUE	FALSE
chr11	60014391	60014620	229	19	24	32	28	17	14	37	41	23	109	29	22	27	114	26	27	6.00145e+07	Srebf1	TRUE	FALSE	FALSE
chr11	95720446	95720675	229	79	123	175	137	98	179	190	231	44	390	129	76	77	325	141	133	9.57206e+07	4833417C18Rik	TRUE	FALSE	FALSE
chr11	120637547	120637776	229	13	39	42	29	33	71	37	58	22	127	44	38	38	127	45	36	120637604	Rfng	TRUE	FALSE	FALSE
chr11	7092797	7093025	228	257	297	299	121	134	276	312	364	242	473	301	147	178	355	275	330	7.09292e+06	Gm11985	TRUE	FALSE	FALSE
chr11	59923813	59924041	228	48	164	71	86	137	68	38	70	53	100	99	109	152	80	46	61	5.9924e+07	Rai1	FALSE	FALSE	TRUE
chr11	70516437	70516665	228	22	45	43	22	6	28	56	44	43	149	37	18	4	117	54	31	7.05166e+07	Kif1c	TRUE	FALSE	FALSE
chr11	72390691	72390919	228	90	49	78	35	55	85	68	94	122	79	57	36	57	104	66	58	7.23908e+07	Spns3	FALSE	TRUE	FALSE
chr11	53608340	53608567	227	25	46	59	18	28	78	47	85	23	137	44	31	29	129	38	57	5.36084e+07	Gm12216	TRUE	FALSE	FALSE
chr11	106649133	106649360	227	74	51	58	95	29	58	53	82	65	144	63	71	27	147	85	63	1.06649e+08	Ddx5	TRUE	FALSE	FALSE
chr11	117820558	117820785	227	139	110	76	65	69	41	59	73	114	96	101	61	55	77	79	105	1.17821e+08	Socs3	FALSE	FALSE	FALSE
chr11	118109977	118110204	227	89	120	108	192	58	142	170	98	86	363	133	136	85	361	154	114	1.1811e+08	Cyth1	TRUE	FALSE	FALSE
chr11	4604196	4604422	226	65	68	89	97	60	88	105	106	54	347	96	88	69	294	96	118	4604271	Uqcr10	TRUE	FALSE	FALSE
chr11	60638845	60639071	226	98	40	41	119	108	80	29	47	165	18	65	104	132	74	57	72	6.06389e+07	Dhrs7b	FALSE	FALSE	TRUE
chr11	68937336	68937562	226	74	68	64	150	120	85	59	85	90	116	85	139	128	90	68	122	6.89375e+07	Aloxe3	FALSE	FALSE	TRUE
chr11	70336781	70337007	226	67	34	53	29	20	22	51	64	63	103	47	25	38	18	43	57	7.03369e+07	Psmb6	FALSE	TRUE	FALSE
chr11	109955600	109955826	226	138	70	55	82	88	48	29	38	122	16	56	74	91	46	33	29	1.09956e+08	Abca8a	FALSE	FALSE	TRUE
chr11	20100688	20100913	225	81	46	40	59	37	60	31	39	129	50	47	38	43	37	39	53	2.01009e+07	Rab1	FALSE	FALSE	TRUE
chr11	90243783	90244008	225	56	50	45	36	10	31	39	57	56	245	44	24	18	125	38	55	9.02439e+07	Hlf	TRUE	FALSE	FALSE
chr11	106559680	106559905	225	80	91	41	36	37	33	23	37	101	34	62	59	26	18	24	50	1.0656e+08	Pecam1	FALSE	FALSE	TRUE
chr11	46378277	46378501	224	98	101	42	75	115	73	41	32	81	50	55	79	101	51	36	61	4.63783e+07	BC053393	FALSE	FALSE	TRUE
chr11	52215108	52215332	224	128	80	24	36	36	27	12	16	155	40	34	26	55	33	14	30	5.22152e+07	9530068E07Rik	FALSE	FALSE	TRUE
chr11	69651696	69651920	224	22	29	39	34	32	41	45	37	44	119	33	34	43	87	33	32	6.96518e+07	1810027O10Rik	TRUE	FALSE	FALSE
chr11	74651415	74651639	224	24	46	39	34	31	61	49	48	16	167	44	33	43	112	39	50	7.46516e+07	Mnt	TRUE	FALSE	FALSE
chr11	80914450	80914674	224	233	153	243	224	153	186	293	280	312	367	230	185	159	253	251	234	8.09145e+07	Accn1	FALSE	TRUE	FALSE
chr11	117175532	117175756	224	85	70	62	61	50	44	79	52	67	164	70	65	83	75	60	64	1.17176e+08	Sept9	FALSE	TRUE	FALSE
chr11	120256984	120257208	224	49	115	33	69	72	32	19	26	74	67	64	57	52	44	32	50	1.20257e+08	Nploc4	FALSE	FALSE	TRUE
chr11	3062361	3062584	223	98	74	95	63	70	33	88	121	99	72	101	53	71	58	92	141	3.06251e+06	Sfi1	FALSE	FALSE	FALSE
chr11	58143733	58143956	223	118	96	154	74	60	180	161	188	80	258	107	51	76	206	119	99	5.81439e+07	Sh3bp5l	TRUE	FALSE	FALSE
chr11	67340183	67340406	223	163	232	263	93	79	277	303	298	178	449	242	90	137	448	251	265	6.73403e+07	Gas7	TRUE	FALSE	FALSE
chr11	77199961	77200184	223	161	183	96	258	251	160	92	105	95	129	153	186	248	149	113	177	7.72001e+07	Ssh2	FALSE	FALSE	TRUE
chr11	119806751	119806974	223	108	149	163	74	52	150	203	169	106	362	130	62	73	374	127	128	1.19807e+08	Baiap2	TRUE	FALSE	FALSE
chr11	16653694	16653916	222	94	56	52	106	101	26	63	50	135	35	54	77	60	31	54	64	1.66538e+07	Egfr	FALSE	FALSE	TRUE
chr11	63720234	63720456	222	73	115	59	67	40	92	59	62	88	111	74	49	62	69	56	89	6.37203e+07	Hs3st3b1	TRUE	FALSE	FALSE
chr11	78236282	78236504	222	71	37	32	93	87	30	27	33	122	25	46	53	93	66	46	38	7.82364e+07	Slc13a2	FALSE	FALSE	TRUE
chr11	115028125	115028347	222	114	93	87	41	75	154	99	81	67	95	86	44	75	185	73	80	1.15028e+08	Slc9a3r1	TRUE	FALSE	FALSE
chr11	5422099	5422320	221	19	39	26	40	7	7	13	34	50	109	26	40	9	22	30	26	5.42217e+06	Xbp1	FALSE	TRUE	FALSE
chr11	29073332	29073553	221	18	26	23	12	11	22	33	22	25	124	20	15	20	51	21	20	2.90734e+07	Smek2	FALSE	TRUE	FALSE
chr11	43740736	43740957	221	188	154	152	273	75	154	163	188	176	373	165	178	136	197	169	156	4.37408e+07	Adra1b	FALSE	TRUE	FALSE
chr11	101226348	101226569	221	19	57	46	23	20	32	29	65	26	157	44	17	31	65	31	49	1.01226e+08	G6pc	FALSE	TRUE	FALSE
chr11	101848435	101848656	221	72	63	32	28	34	24	19	32	112	12	43	29	38	13	23	32	1.01849e+08	1700006E09Rik	FALSE	FALSE	FALSE
chr11	4194513	4194733	220	72	161	76	89	70	33	39	41	85	83	99	125	92	54	50	59	4.19464e+06	Lif	FALSE	FALSE	TRUE
chr11	72288453	72288673	220	82	78	94	58	72	58	75	121	86	172	101	73	76	60	85	118	7.22885e+07	Spns2	FALSE	TRUE	FALSE
chr11	79101081	79101301	220	401	258	244	270	206	134	253	232	420	139	251	243	194	168	235	216	7.91012e+07	Wsb1	FALSE	FALSE	FALSE
chr11	84011544	84011764	220	212	191	249	147	129	151	296	298	237	415	225	135	159	242	187	235	8.40117e+07	Acaca	FALSE	TRUE	FALSE
chr11	102889446	102889666	220	187	166	180	104	121	239	176	211	163	192	173	73	132	267	166	196	1.0289e+08	Nmt1	TRUE	FALSE	FALSE
chr11	108168721	108168941	220	110	159	129	52	66	65	111	157	178	109	150	66	58	56	113	184	1.08169e+08	Prkca	FALSE	FALSE	FALSE
chr11	115472605	115472825	220	74	106	62	75	62	46	59	55	109	80	88	56	60	74	72	93	1.15473e+08	Mif4gd	FALSE	FALSE	TRUE
chr11	120541507	120541727	220	90	71	97	77	98	57	91	132	124	72	74	62	110	48	60	110	1.20542e+08	Aspscr1	FALSE	FALSE	FALSE
chr11	7048145	7048364	219	35	75	60	88	63	46	49	80	66	141	68	78	93	85	55	92	7.04823e+06	Adcy1	FALSE	TRUE	FALSE
chr11	14083307	14083526	219	124	63	28	112	109	69	21	26	128	21	49	78	124	58	30	38	1.40834e+07	Pom121l12	FALSE	FALSE	TRUE
chr11	31724666	31724885	219	114	105	122	109	72	105	127	147	129	103	112	82	96	106	110	121	3.17248e+07	Cpeb4	FALSE	TRUE	FALSE
chr11	75004002	75004221	219	26	60	59	64	40	74	63	64	32	146	60	77	60	152	54	67	7.50041e+07	Dph1	TRUE	FALSE	FALSE
chr11	75234580	75234799	219	64	100	109	31	31	93	95	140	52	351	91	37	49	210	80	99	7.52347e+07	Serpinf1	FALSE	TRUE	FALSE
chr11	80003902	80004121	219	412	318	292	448	553	228	196	277	516	176	311	429	499	241	246	289	8.0004e+07	Rnf135	FALSE	FALSE	TRUE
chr11	86387342	86387561	219	10	61	26	17	12	11	23	12	20	112	34	18	3	14	31	13	8.63875e+07	Tubd1	FALSE	TRUE	FALSE
chr11	112951488	112951707	219	75	75	43	53	57	12	34	27	129	37	62	51	60	36	27	49	1.12952e+08	2610035D17Rik	FALSE	FALSE	TRUE
chr11	5640004	5640222	218	133	137	101	116	84	31	93	112	177	213	120	92	84	85	101	135	5640107	Urgcp	FALSE	TRUE	FALSE
chr11	43742654	43742872	218	49	80	80	48	37	68	79	112	47	155	69	33	71	113	58	78	4.37428e+07	Adra1b	TRUE	FALSE	FALSE
chr11	83867357	83867575	218	94	154	164	187	109	145	179	216	103	373	192	144	90	220	200	200	8.38675e+07	Dusp14	TRUE	FALSE	FALSE
chr11	84496504	84496722	218	158	112	193	112	157	351	170	248	156	112	155	106	194	353	147	174	8.44966e+07	Mrm1	TRUE	FALSE	FALSE
chr11	116484658	116484876	218	129	235	193	125	87	122	202	195	81	482	209	104	118	211	181	199	1.16485e+08	Rhbdf2	FALSE	TRUE	FALSE
chr11	11735472	11735689	217	108	155	96	138	100	78	92	88	108	143	128	117	100	84	107	103	1.17356e+07	Ddc	FALSE	FALSE	TRUE
chr11	20536226	20536443	217	38	68	74	36	71	46	61	91	80	114	87	58	104	71	83	102	2.05363e+07	Sertad2	FALSE	TRUE	FALSE
chr11	53619440	53619657	217	57	96	80	66	47	70	71	92	98	184	84	65	47	126	73	93	5.36195e+07	Gm12216	TRUE	FALSE	FALSE
chr11	58136881	58137098	217	17	39	29	20	13	27	31	41	12	133	22	17	19	89	21	19	5.8137e+07	Zfp672	TRUE	FALSE	FALSE
chr11	66844960	66845177	217	52	80	44	48	45	26	31	47	78	123	56	67	32	60	40	55	6.6845e+07	Tmem220	FALSE	TRUE	FALSE
chr11	85509415	85509632	217	158	140	188	61	53	158	232	210	120	368	158	50	107	296	189	162	8.55095e+07	Bcas3	FALSE	TRUE	FALSE
chr11	96796331	96796548	217	14	44	48	20	15	24	42	63	54	140	45	22	19	37	46	39	9.67964e+07	Prr15l	TRUE	FALSE	FALSE
chr11	105927143	105927360	217	114	151	197	112	80	165	241	238	176	423	154	61	73	347	161	151	105927278	Taco1	TRUE	FALSE	FALSE
chr11	110324525	110324742	217	104	121	92	129	127	92	79	107	135	121	130	136	138	115	87	157	1.10325e+08	Map2k6	FALSE	FALSE	TRUE
chr11	111307222	111307439	217	52	24	24	93	109	47	16	23	49	14	30	85	85	33	15	39	1.11307e+08	Kcnj2	FALSE	FALSE	FALSE
chr11	118907964	118908181	217	103	117	171	394	140	159	253	174	107	413	173	217	152	480	192	212	1.18908e+08	Cbx8	TRUE	FALSE	FALSE
chr11	120657717	120657934	217	115	182	205	224	96	216	207	262	95	519	191	172	147	425	183	214	1.20658e+08	Dus1l	TRUE	FALSE	FALSE
chr11	4120189	4120405	216	52	69	85	35	29	41	109	98	38	195	73	25	34	110	72	67	4.12033e+06	Gatsl3	FALSE	TRUE	FALSE
chr11	53584119	53584335	216	47	93	83	66	34	83	103	108	101	375	99	64	47	264	103	86	5.35842e+07	Irf1	TRUE	FALSE	FALSE
chr11	83550631	83550847	216	75	69	45	90	150	70	25	45	71	29	52	106	137	94	30	59	8.35508e+07	1100001G20Rik	FALSE	FALSE	TRUE
chr11	115553440	115553656	216	233	213	81	92	99	37	65	65	229	104	126	84	107	48	60	128	1.15554e+08	Grb2	FALSE	FALSE	TRUE
chr11	120834032	120834248	216	28	110	38	49	53	22	31	19	6	83	70	47	38	25	44	40	1.20834e+08	Csnk1d	FALSE	FALSE	TRUE
chr11	49988254	49988469	215	20	40	32	56	25	36	35	41	10	149	29	58	13	109	19	48	4.99884e+07	3010026O09Rik	TRUE	FALSE	FALSE
chr11	86681058	86681273	215	16	42	38	21	10	12	25	54	21	111	36	14	17	12	35	34	8.66811e+07	Dhx40	FALSE	TRUE	FALSE
chr11	86730007	86730222	215	30	40	34	17	12	49	29	44	28	104	40	32	14	69	31	49	8.67301e+07	Ypel2	TRUE	FALSE	FALSE
chr11	103079099	103079314	215	62	32	45	88	21	23	55	54	33	167	44	55	30	137	53	45	1.03079e+08	4933400C05Rik	TRUE	FALSE	FALSE
chr11	120358819	120359034	215	39	45	39	10	14	29	36	46	63	122	45	13	27	56	44	50	1.20359e+08	Slc25a10	TRUE	FALSE	FALSE
chr11	99352499	99352713	214	66	82	49	79	97	52	21	49	55	38	54	96	111	72	25	61	9.93526e+07	Krt23	FALSE	FALSE	TRUE
chr11	106129795	106130009	214	91	126	137	37	34	176	142	168	114	314	129	41	72	352	165	119	1.0613e+08	Smarcd2	TRUE	FALSE	FALSE
chr11	116704729	116704943	214	28	60	34	154	25	33	32	51	33	211	41	100	24	130	38	43	1.16705e+08	1110005A03Rik	FALSE	TRUE	FALSE
chr11	74645581	74645794	213	30	38	21	56	15	22	21	29	18	136	22	40	19	80	19	24	7.46457e+07	Mnt	TRUE	FALSE	FALSE
chr11	120852625	120852838	213	61	86	96	111	46	104	123	101	62	372	93	90	58	268	108	89	1.20853e+08	Csnk1d	TRUE	FALSE	FALSE
chr11	120947752	120947965	213	95	108	35	42	45	31	10	24	142	28	69	33	59	19	22	42	1.20948e+08	Sectm1a	FALSE	FALSE	TRUE
chr11	34820386	34820598	212	78	119	102	54	34	92	96	123	95	191	119	83	72	124	113	107	3.48205e+07	Slit3	TRUE	FALSE	FALSE
chr11	96718895	96719107	212	47	105	97	68	44	99	89	129	14	246	101	100	58	149	53	103	96719006	Copz2	TRUE	FALSE	FALSE
chr11	115311525	115311737	212	110	117	69	84	100	73	44	80	153	82	89	91	86	100	63	112	1.15312e+08	Mir3968	FALSE	FALSE	TRUE
chr11	116081824	116082036	212	20	31	21	25	15	25	21	29	16	126	21	27	27	74	18	24	1.16082e+08	Cdk3-ps	TRUE	FALSE	FALSE
chr11	121301106	121301318	212	144	32	37	35	68	26	31	30	109	11	52	48	48	26	25	45	1.21301e+08	Fn3k	FALSE	FALSE	FALSE
chr11	3030377	3030588	211	21	43	46	16	6	17	67	45	33	108	38	10	13	42	42	39	3.03055e+06	Fn3k	FALSE	TRUE	FALSE
chr11	52516980	52517191	211	23	72	59	25	16	22	46	50	1	157	71	60	26	30	31	34	5.25171e+07	Fstl4	FALSE	TRUE	FALSE
chr11	61049673	61049884	211	62	65	24	25	44	31	12	20	116	8	41	40	48	26	15	26	6.10497e+07	Aldh3a1	FALSE	FALSE	TRUE
chr11	89320872	89321083	211	81	79	86	29	55	42	57	110	54	100	98	45	55	41	58	91	8.93209e+07	Ankfn1	FALSE	TRUE	FALSE
chr11	97192710	97192921	211	109	90	58	96	69	15	41	78	203	108	86	69	61	69	55	93	9.71928e+07	Gpr179	FALSE	FALSE	FALSE
chr11	60796104	60796314	210	116	177	155	234	81	27	184	158	67	345	132	150	65	122	134	113	6.07962e+07	Map2k3	FALSE	FALSE	TRUE
chr11	78008133	78008343	210	18	21	44	42	11	38	63	43	48	82	37	38	28	105	45	30	7.80083e+07	Proca1	TRUE	FALSE	FALSE
chr11	80605709	80605919	210	123	106	34	97	96	44	23	29	166	25	67	101	51	43	36	22	8.06058e+07	Myo1d	FALSE	FALSE	TRUE
chr11	108256427	108256637	210	101	56	39	74	83	31	33	24	82	39	28	43	94	21	24	22	1.08257e+08	Apoh	FALSE	FALSE	TRUE
chr11	3344978	3345187	209	44	139	40	61	39	24	14	24	40	91	67	101	52	55	23	26	3.34505e+06	Rnf185	FALSE	TRUE	FALSE
chr11	70255406	70255615	209	34	112	67	96	70	36	61	57	21	147	111	89	56	81	91	90	7.02555e+07	Arrb2	FALSE	TRUE	FALSE
chr11	70642496	70642705	209	180	102	131	228	231	114	123	162	156	69	120	139	164	130	107	133	7.06426e+07	Rabep1	FALSE	FALSE	FALSE
chr11	75245090	75245299	209	22	25	39	19	24	53	38	50	18	123	26	25	24	96	26	29	7.52452e+07	Serpinf2	TRUE	FALSE	FALSE
chr11	94254292	94254501	209	123	73	115	94	100	183	150	132	131	140	147	85	151	337	192	156	9.42544e+07	Abcc3	TRUE	FALSE	FALSE
chr11	96804961	96805170	209	14	44	34	40	14	31	36	41	9	163	36	40	35	128	33	34	9.6805e+07	Pnpo	TRUE	FALSE	FALSE
chr11	103153480	103153689	209	4	83	57	41	21	30	101	25	13	86	75	53	23	26	80	27	1.03154e+08	Map3k14	FALSE	TRUE	FALSE
chr11	119251140	119251349	209	65	80	97	144	67	149	124	112	49	215	97	145	86	309	107	95	1.19251e+08	Mir1932	TRUE	FALSE	FALSE
chr11	3032212	3032420	208	74	75	113	25	26	120	129	132	46	176	106	41	69	264	121	135	3.03224e+06	Slc26a11	TRUE	FALSE	FALSE
chr11	87452855	87453063	208	63	70	48	96	38	68	67	57	82	136	55	79	51	124	64	59	8.74529e+07	Hsf5	FALSE	TRUE	FALSE
chr11	100944841	100945049	208	291	436	410	147	116	428	486	477	242	1279	408	188	219	946	444	368	1.00945e+08	Coasy	TRUE	FALSE	FALSE
chr11	22792030	22792237	207	194	169	192	103	120	226	195	224	319	283	190	112	150	287	167	201	2.27921e+07	B3gnt2	FALSE	TRUE	FALSE
chr11	62422724	62422931	207	11	22	25	14	6	39	39	26	18	103	35	11	3	85	41	35	6.24228e+07	BC046404	TRUE	FALSE	FALSE
chr11	72609538	72609745	207	86	137	142	332	82	122	208	138	61	350	136	185	90	292	169	118	7.26096e+07	Zzef1	TRUE	FALSE	FALSE
chr11	76320415	76320622	207	104	61	42	39	34	12	28	35	84	37	52	25	21	19	33	30	7.63205e+07	Abr	FALSE	FALSE	FALSE
chr11	84683121	84683328	207	101	126	125	344	83	106	170	132	94	472	124	204	114	316	130	152	8.46833e+07	Ggnbp2	FALSE	TRUE	FALSE
chr11	95062318	95062525	207	25	29	42	8	10	55	42	58	3	114	43	12	17	76	35	53	9.50624e+07	Dlx4	FALSE	TRUE	FALSE
chr11	119045269	119045476	207	137	149	183	154	99	179	174	212	185	285	172	118	119	224	158	191	1.19045e+08	Tbc1d16	TRUE	FALSE	FALSE
chr11	70332351	70332557	206	108	70	35	61	139	24	21	21	183	19	46	43	84	29	33	29	7.03324e+07	Gltpd2	FALSE	FALSE	TRUE
chr11	87405236	87405442	206	21	44	54	61	34	56	59	57	17	199	51	61	30	171	53	43	8.74053e+07	Mtmr4	TRUE	FALSE	FALSE
chr11	94020924	94021130	206	133	79	104	17	24	63	102	127	109	192	101	26	29	79	108	114	9.4021e+07	Tob1	FALSE	TRUE	FALSE
chr11	6191454	6191659	205	12	27	22	41	18	38	22	35	6	95	23	42	20	101	21	23	6.19155e+06	Ogdh	TRUE	FALSE	FALSE
chr11	12363938	12364143	205	59	121	80	37	69	52	63	83	98	101	100	61	59	67	63	103	1.2364e+07	Cobl	FALSE	FALSE	TRUE
chr11	53332766	53332971	205	85	150	248	82	83	178	322	277	109	457	230	96	100	534	246	197	5.33329e+07	Sept8	TRUE	FALSE	FALSE
chr11	90121542	90121747	205	74	46	44	91	133	44	31	38	59	25	48	76	148	56	24	47	9.01217e+07	Mmd	FALSE	FALSE	FALSE
chr11	119419408	119419613	205	119	83	93	70	69	78	88	117	122	87	113	58	64	78	101	151	1.19419e+08	Gm11762	FALSE	FALSE	FALSE
chr11	79592297	79592501	204	68	84	99	72	56	75	85	125	93	197	89	38	61	113	76	99	7.95924e+07	Mir365-2	TRUE	FALSE	FALSE
chr11	106974511	106974715	204	58	117	53	64	81	36	35	43	48	101	86	68	62	71	43	76	106974602	Bptf	FALSE	FALSE	TRUE
chr11	50014240	50014443	203	57	53	74	63	43	76	92	82	40	114	67	50	28	70	70	86	5.00143e+07	Sqstm1	FALSE	TRUE	FALSE
chr11	53259189	53259392	203	11	88	49	26	9	24	44	62	24	191	51	36	19	58	40	38	5.32593e+07	Shroom1	FALSE	TRUE	FALSE
chr11	60166060	60166263	203	23	27	30	24	12	29	22	39	12	123	29	30	22	60	18	37	6.01661e+07	Tom1l2	TRUE	FALSE	FALSE
chr11	72248503	72248706	203	56	140	62	71	91	48	59	67	81	120	79	87	78	72	67	80	7.22486e+07	Ggt6	FALSE	TRUE	FALSE
chr11	75281085	75281288	203	35	51	61	19	18	24	57	69	84	134	51	16	27	41	57	47	7.52812e+07	Tlcd2	FALSE	TRUE	FALSE
chr11	86393979	86394182	203	109	110	92	72	93	42	50	113	82	127	113	94	106	68	72	120	8.6394e+07	Tubd1	FALSE	TRUE	FALSE
chr11	112987407	112987610	203	138	129	93	183	95	63	99	90	118	91	134	127	96	67	110	124	1.12988e+08	2610035D17Rik	FALSE	FALSE	TRUE
chr11	117066123	117066326	203	72	159	175	76	62	140	164	250	136	434	177	97	123	342	155	232	1.17066e+08	Sept9	TRUE	FALSE	FALSE
chr11	120211665	120211868	203	24	51	41	75	34	56	42	55	41	176	43	58	35	111	45	42	1.20212e+08	0610009L18Rik	TRUE	FALSE	FALSE
chr11	12090588	12090790	202	93	63	54	173	113	73	35	67	147	51	85	178	151	120	48	81	1.20906e+07	Grb10	FALSE	FALSE	FALSE
chr11	75275638	75275840	202	65	45	40	26	12	34	35	45	50	146	32	18	22	108	31	34	7.52758e+07	2210403K04Rik	TRUE	FALSE	FALSE
chr11	108192321	108192523	202	128	67	166	42	40	70	211	186	128	140	124	21	87	123	152	135	1.08192e+08	Prkca	FALSE	TRUE	FALSE
chr11	112994317	112994519	202	75	71	86	37	32	76	75	107	58	167	80	50	56	80	85	59	1.12994e+08	2610035D17Rik	TRUE	FALSE	FALSE
chr11	118009662	118009864	202	71	71	44	121	94	43	21	51	50	43	61	98	97	54	43	44	1.1801e+08	Dnahc17	FALSE	FALSE	TRUE
chr11	5900380	5900581	201	32	41	34	12	21	41	45	40	10	130	40	14	14	62	42	27	5.90048e+06	Camk2b	FALSE	TRUE	FALSE
chr11	54749617	54749818	201	49	42	73	32	24	134	98	87	61	99	65	23	45	165	87	72	5.47497e+07	Tnip1	TRUE	FALSE	FALSE
chr11	70826372	70826573	201	152	188	145	175	250	94	133	171	207	104	170	139	214	129	116	200	7.08265e+07	Derl2	FALSE	FALSE	TRUE
chr11	77358828	77359029	201	92	96	32	51	87	54	15	25	102	34	49	67	119	28	20	30	7.73589e+07	Taok1	FALSE	FALSE	FALSE
chr11	82577729	82577930	201	31	35	38	59	25	40	57	39	27	120	50	69	35	136	49	39	8.25778e+07	Cct6b	TRUE	FALSE	FALSE
chr11	94059799	94060000	201	61	40	61	79	78	87	65	80	71	82	62	46	80	127	53	75	9.40599e+07	Tob1	TRUE	FALSE	FALSE
chr11	95218016	95218217	201	88	129	136	94	73	154	148	146	94	332	160	105	90	343	150	145	9.52181e+07	Fam117a	TRUE	FALSE	FALSE
chr11	35764969	35765169	200	146	133	145	82	107	162	134	186	156	110	133	72	111	188	128	138	3.57651e+07	Wwc1	FALSE	TRUE	FALSE
chr11	69137198	69137398	200	64	177	149	228	90	184	173	167	81	472	147	164	110	378	151	151	6.91373e+07	Cntrob	TRUE	FALSE	FALSE
chr11	70315678	70315878	200	61	68	28	57	97	41	19	33	141	20	48	60	75	56	33	32	7.03157e+07	Tm4sf5	FALSE	FALSE	TRUE
chr11	89852992	89853192	200	59	41	19	22	34	17	4	13	125	7	27	26	61	18	12	11	8.98531e+07	Pctp	FALSE	FALSE	TRUE
chr11	101240640	101240840	200	234	208	182	87	88	114	171	215	268	439	183	94	115	178	163	183	1.01241e+08	G6pc	FALSE	TRUE	FALSE
chr11	103612120	103612320	200	59	137	62	78	115	66	35	62	89	110	95	95	103	61	47	95	1.03612e+08	Wnt9b	FALSE	FALSE	TRUE
chr11	110039570	110039770	200	100	66	37	130	88	43	18	28	100	18	52	90	81	41	33	33	1.1004e+08	Abca6	FALSE	FALSE	TRUE
chr11	115638395	115638595	200	137	195	196	181	81	185	248	207	137	402	168	142	80	300	187	168	1.15638e+08	2310067B10Rik	TRUE	FALSE	FALSE
chr11	117823503	117823703	200	83	269	242	83	63	237	248	269	163	429	259	115	153	422	228	273	1.17824e+08	Socs3	TRUE	FALSE	FALSE
chr11	121379484	121379684	200	281	458	447	217	140	283	558	478	195	1109	354	163	194	499	376	315	1.2138e+08	Zfp750	FALSE	TRUE	FALSE
chr11	16666522	16666721	199	55	71	67	79	48	29	79	72	78	114	64	51	29	58	61	69	1.66666e+07	Egfr	FALSE	TRUE	FALSE
chr11	48633386	48633585	199	26	27	31	180	88	77	37	31	21	23	40	160	96	79	33	21	4.86335e+07	Trim41	FALSE	FALSE	FALSE
chr11	82659316	82659515	199	131	208	238	107	75	211	280	280	169	683	229	126	170	557	217	261	8.26594e+07	Rffl	TRUE	FALSE	FALSE
chr11	51471925	51472123	198	36	64	62	57	46	63	87	62	51	167	62	40	41	74	63	64	5.1472e+07	D930048N14Rik	FALSE	TRUE	FALSE
chr11	61318210	61318408	198	38	25	80	68	42	79	140	51	44	133	66	58	61	232	96	40	6.13184e+07	B9d1	TRUE	FALSE	FALSE
chr11	79691734	79691932	198	174	204	159	298	229	178	118	214	224	224	195	256	198	183	173	244	79691810	Utp6	FALSE	FALSE	FALSE
chr11	97003744	97003942	198	225	169	173	99	87	166	155	214	223	161	182	92	91	134	158	189	9.70038e+07	Tbkbp1	FALSE	TRUE	FALSE
chr11	106441892	106442090	198	151	172	131	132	137	65	118	147	186	134	160	119	124	72	134	172	1.06442e+08	Tex2	FALSE	FALSE	FALSE
chr11	109921495	109921693	198	167	109	92	246	252	90	71	110	216	102	107	160	200	142	81	137	1.09922e+08	Abca8a	FALSE	FALSE	TRUE
chr11	115949625	115949823	198	148	110	54	105	78	61	43	50	131	46	79	63	83	57	46	93	1.1595e+08	Wbp2	FALSE	FALSE	FALSE
chr11	117676256	117676454	198	33	77	64	29	42	102	85	68	62	172	57	50	58	139	61	62	1.17676e+08	Syngr2	TRUE	FALSE	FALSE
chr11	21472150	21472347	197	32	59	57	21	27	86	59	71	86	161	59	25	34	138	49	71	2.14723e+07	Wdpcp	TRUE	FALSE	FALSE
chr11	58116192	58116389	197	59	128	109	51	76	136	137	132	36	365	86	57	125	266	93	86	58116281	Zfp692	TRUE	FALSE	FALSE
chr11	85656556	85656753	197	32	36	36	39	21	49	33	38	27	118	30	38	25	85	30	22	8.56567e+07	Tbx2	TRUE	FALSE	FALSE
chr11	100652958	100653155	197	64	110	59	39	37	50	41	72	100	70	58	40	55	67	39	82	1.00653e+08	Stat5b	FALSE	FALSE	FALSE
chr11	120328724	120328921	197	18	42	48	59	24	43	55	52	30	129	45	52	33	121	38	50	1.20329e+08	Arl16	TRUE	FALSE	FALSE
chr11	121188112	121188309	197	238	171	147	104	100	39	121	169	177	113	151	85	71	77	137	152	1.21188e+08	Wdr45l	FALSE	FALSE	FALSE
chr11	4157865	4158061	196	36	46	73	70	78	66	57	91	41	111	75	67	70	84	65	84	4.15798e+06	Lif	TRUE	FALSE	FALSE
chr11	18800548	18800744	196	128	36	32	74	120	66	23	41	129	29	44	74	90	59	33	51	1.88006e+07	Meis1	FALSE	FALSE	TRUE
chr11	53122469	53122665	196	310	220	83	143	125	52	39	45	254	93	128	169	168	68	61	48	5.31225e+07	Hspa4	FALSE	FALSE	TRUE
chr11	55021891	55022087	196	122	93	99	146	116	87	87	121	95	107	114	120	100	120	118	112	5.5022e+07	Slc36a1	FALSE	FALSE	TRUE
chr11	70265366	70265562	196	20	52	43	62	35	51	48	57	26	140	49	62	27	140	51	62	7.02654e+07	Med11	TRUE	FALSE	FALSE
chr11	101032631	101032827	196	57	71	80	90	24	57	112	88	38	262	76	65	23	197	99	53	1.01033e+08	Plekhh3	TRUE	FALSE	FALSE
chr11	118304644	118304840	196	56	46	54	53	20	56	66	47	32	127	61	72	27	84	70	42	1.18305e+08	C1qtnf1	TRUE	FALSE	FALSE
chr11	120379548	120379744	196	120	185	119	119	100	109	100	127	159	203	146	106	117	142	119	172	1.2038e+08	Gcgr	FALSE	TRUE	FALSE
chr11	7715759	7715954	195	36	129	46	37	50	26	43	35	33	265	86	45	39	43	61	50	7.71589e+06	Igfbp3	FALSE	TRUE	FALSE
chr11	35784516	35784711	195	55	83	91	94	56	53	98	92	61	107	92	76	60	51	90	89	3.57846e+07	Wwc1	FALSE	TRUE	FALSE
chr11	79735775	79735970	195	55	78	97	28	17	67	136	95	63	322	83	28	24	246	102	56	7.97359e+07	Utp6	TRUE	FALSE	FALSE
chr11	82743118	82743313	195	159	53	73	146	95	173	58	87	156	24	83	110	87	83	81	92	8.27432e+07	Unc45b	FALSE	FALSE	FALSE
chr11	83727631	83727826	195	162	132	168	71	113	90	188	198	155	203	167	98	99	91	187	158	8.37277e+07	Ddx52	FALSE	TRUE	FALSE
chr11	109962838	109963033	195	73	26	43	127	147	74	36	57	80	10	53	117	160	78	49	74	1.09963e+08	Abca9	FALSE	FALSE	FALSE
chr11	113592153	113592348	195	118	152	141	58	33	148	156	147	155	374	132	54	72	186	116	141	1.13592e+08	Cdc42ep4	TRUE	FALSE	FALSE
chr11	120350775	120350970	195	20	41	43	20	17	32	44	59	31	110	52	23	26	59	41	59	1.20351e+08	Slc25a10	FALSE	TRUE	FALSE
chr11	20182980	20183174	194	50	82	35	62	112	53	21	24	37	26	58	78	115	62	29	22	2.0183e+07	Cep68	FALSE	FALSE	TRUE
chr11	59653229	59653423	194	51	38	54	91	39	56	68	61	24	90	40	73	31	115	41	41	5.96533e+07	Cops3	TRUE	FALSE	FALSE
chr11	70818019	70818213	194	175	171	143	175	109	91	169	164	163	275	136	109	117	126	141	131	7.08181e+07	Dhx33	FALSE	TRUE	FALSE
chr11	119304834	119305028	194	24	28	47	53	23	46	61	48	19	87	46	53	24	101	62	44	1.19305e+08	A730011L01Rik	TRUE	FALSE	FALSE
chr11	48630748	48630941	193	20	56	35	76	21	31	36	49	4	152	43	66	27	124	35	39	4.86308e+07	Trim41	TRUE	FALSE	FALSE
chr11	61378148	61378341	193	81	75	78	59	49	41	52	114	79	194	81	68	38	59	80	89	6.13782e+07	Epn2	FALSE	TRUE	FALSE
chr11	77328319	77328512	193	39	40	41	19	16	51	44	62	25	135	58	21	25	153	71	70	7.73284e+07	Abhd15	TRUE	FALSE	FALSE
chr11	78002185	78002378	193	63	32	32	103	7	14	37	38	40	93	30	58	17	83	31	31	7.80023e+07	Rab34	TRUE	FALSE	FALSE
chr11	90130251	90130444	193	61	42	26	38	52	41	12	40	118	25	32	29	42	57	18	48	9.01303e+07	Mmd	FALSE	FALSE	FALSE
chr11	101834095	101834288	193	52	39	37	74	95	36	22	43	65	14	51	67	101	39	30	69	1.01834e+08	Dusp3	FALSE	FALSE	TRUE
chr11	102294002	102294195	193	30	70	50	13	20	55	44	67	28	289	52	20	19	134	45	49	1.02294e+08	Grn	TRUE	FALSE	FALSE
chr11	118858632	118858825	193	25	82	81	71	33	24	85	97	51	128	69	49	27	47	64	53	1.18859e+08	Enpp7	FALSE	TRUE	FALSE
chr11	120437962	120438155	193	67	66	81	38	35	29	81	98	88	181	94	48	67	68	81	99	1.20438e+08	Arhgdia	FALSE	TRUE	FALSE
chr11	121090548	121090741	193	51	53	49	27	14	53	65	39	64	133	55	28	34	65	56	51	1.21091e+08	BC017643	FALSE	TRUE	FALSE
chr11	12134979	12135171	192	88	98	59	78	147	53	43	57	175	42	74	73	87	52	56	58	1.21351e+07	Grb10	FALSE	FALSE	TRUE
chr11	23565256	23565448	192	79	67	73	167	147	85	57	100	108	63	86	131	112	139	85	103	2.35653e+07	Pus10	FALSE	FALSE	FALSE
chr11	38494855	38495047	192	100	49	33	67	114	46	22	32	115	6	50	77	115	34	31	51	3.84949e+07	Gm12130	FALSE	FALSE	TRUE
chr11	59015737	59015929	192	19	48	43	57	27	75	59	49	47	140	51	48	44	130	53	55	5.90158e+07	2610507I01Rik	TRUE	FALSE	FALSE
chr11	59850441	59850633	192	203	202	248	217	84	112	265	297	188	430	223	148	105	163	231	216	5.98505e+07	Pemt	FALSE	TRUE	FALSE
chr11	60351035	60351227	192	63	71	57	110	52	68	71	63	79	104	71	95	64	128	76	63	6.03511e+07	Alkbh5	TRUE	FALSE	FALSE
chr11	60644158	60644350	192	106	120	111	113	84	90	125	134	95	156	113	107	112	162	105	134	6.06443e+07	Dhrs7b	TRUE	FALSE	FALSE
chr11	60747065	60747257	192	67	139	67	42	31	103	81	74	67	233	80	46	62	146	78	82	6.07472e+07	Map2k3	TRUE	FALSE	FALSE
chr11	62416497	62416689	192	27	72	63	128	39	58	61	88	68	113	58	93	45	125	58	81	6.24166e+07	Snord49b	TRUE	FALSE	FALSE
chr11	87500825	87501017	192	76	171	54	107	89	70	22	25	101	107	103	110	89	80	32	28	8.75009e+07	Rnf43	FALSE	FALSE	TRUE
chr11	97468643	97468835	192	111	83	55	84	112	90	27	51	111	26	63	96	159	66	40	57	97468791	2410003L11Rik	FALSE	FALSE	TRUE
chr11	100454074	100454266	192	116	167	140	75	109	132	125	172	86	254	149	73	99	190	121	168	1.00454e+08	Dnajc7	TRUE	FALSE	FALSE
chr11	116969992	116970184	192	130	191	178	84	93	91	215	202	126	307	160	67	75	99	176	170	1.1697e+08	Sec14l1	FALSE	TRUE	FALSE
chr11	49981904	49982095	191	139	95	65	78	92	59	54	65	145	98	79	40	72	62	52	95	4.9982e+07	Tbc1d9b	FALSE	TRUE	FALSE
chr11	77008962	77009153	191	72	128	79	71	97	53	50	104	101	113	117	82	115	67	77	117	7.70091e+07	Efcab5	FALSE	FALSE	TRUE
chr11	94087445	94087636	191	80	102	133	29	46	66	134	162	84	215	121	41	48	63	118	116	9.40876e+07	Tob1	FALSE	TRUE	FALSE
chr11	116338401	116338592	191	64	25	54	25	43	61	59	65	74	68	47	35	50	143	61	53	1.16339e+08	Prpsap1	TRUE	FALSE	FALSE
chr11	21150485	21150675	190	38	97	30	95	91	45	24	27	58	118	39	87	49	58	34	30	2.11505e+07	Vps54	FALSE	TRUE	FALSE
chr11	63692219	63692409	190	104	144	101	95	115	70	85	114	117	129	136	124	117	124	89	145	6.36923e+07	Hs3st3b1	FALSE	FALSE	TRUE
chr11	75308276	75308466	190	101	56	56	150	157	70	49	62	121	48	90	114	187	118	77	108	7.53084e+07	Prpf8	FALSE	FALSE	FALSE
chr11	80789934	80790124	190	93	115	114	226	158	81	122	97	44	106	129	168	101	140	136	109	8.07899e+07	Accn1	FALSE	FALSE	TRUE
chr11	98927287	98927477	190	148	225	183	61	73	95	173	221	91	544	190	97	76	120	168	187	9.89274e+07	Tns4	FALSE	TRUE	FALSE
chr11	102973209	102973399	190	66	95	114	50	46	184	134	148	47	297	126	70	105	349	133	147	1.02973e+08	Acbd4	TRUE	FALSE	FALSE
chr11	106889476	106889666	190	52	83	48	197	27	57	67	50	52	226	62	141	44	190	55	74	1.0689e+08	1810010H24Rik	TRUE	FALSE	FALSE
chr11	117642169	117642359	190	52	55	54	21	11	43	53	59	45	118	51	25	26	46	60	51	1.17642e+08	Tmc6	FALSE	TRUE	FALSE
chr11	50011096	50011285	189	86	98	84	51	28	53	67	119	31	196	85	33	44	104	63	99	5.00112e+07	3010026O09Rik	TRUE	FALSE	FALSE
chr11	75474987	75475176	189	10	36	34	12	19	30	26	48	11	123	33	11	25	95	21	40	7.5475e+07	Myo1c	TRUE	FALSE	FALSE
chr11	94899981	94900170	189	101	137	93	52	84	164	103	101	48	207	104	67	93	182	87	103	9.49001e+07	Pdk2	TRUE	FALSE	FALSE
chr11	106473415	106473604	189	19	34	40	63	32	41	42	45	18	158	38	36	31	94	52	32	106473521	Tex2	TRUE	FALSE	FALSE
chr11	106908597	106908786	189	92	44	41	74	75	51	28	50	117	35	42	76	62	70	29	51	1.06909e+08	Bptf	FALSE	FALSE	TRUE
chr11	118073243	118073432	189	54	92	93	33	26	97	91	121	69	334	97	45	52	221	70	105	1.18073e+08	Cyth1	FALSE	TRUE	FALSE
chr11	21302947	21303135	188	93	28	50	178	244	153	35	76	102	9	54	139	246	69	52	59	2.13031e+07	Ugp2	FALSE	FALSE	FALSE
chr11	31761671	31761859	188	33	24	20	97	97	42	17	22	38	20	25	122	80	53	20	20	3.17617e+07	Cpeb4	FALSE	FALSE	FALSE
chr11	36957651	36957839	188	201	149	93	218	241	97	55	97	152	89	104	183	237	121	50	90	3.69577e+07	Odz2	FALSE	FALSE	TRUE
chr11	50079458	50079646	188	30	52	43	93	39	57	38	58	75	146	56	92	49	125	36	81	5.00796e+07	Maml1	TRUE	FALSE	FALSE
chr11	53113779	53113967	188	62	139	120	188	57	166	116	158	42	448	122	170	72	333	99	149	5.31139e+07	Hspa4	TRUE	FALSE	FALSE
chr11	53653397	53653585	188	13	52	16	11	3	19	7	31	20	101	20	11	8	20	10	28	5.36535e+07	Gm12216	FALSE	TRUE	FALSE
chr11	63728009	63728197	188	57	82	99	252	68	165	118	111	53	209	80	188	134	258	88	99	6.37281e+07	Hs3st3b1	TRUE	FALSE	FALSE
chr11	68908550	68908738	188	86	58	87	67	60	104	109	94	55	169	84	62	77	160	74	102	6.89087e+07	Per1	TRUE	FALSE	FALSE
chr11	86657447	86657635	188	7	75	57	33	36	43	83	51	20	112	68	57	46	47	62	58	8.66575e+07	Dhx40	FALSE	TRUE	FALSE
chr11	90093027	90093215	188	84	88	37	92	89	50	20	43	124	26	48	84	98	58	27	24	9.00931e+07	Mmd	FALSE	FALSE	TRUE
chr11	98902933	98903121	188	36	62	41	247	37	59	59	41	62	293	62	134	42	169	59	57	9.8903e+07	Igfbp4	FALSE	TRUE	FALSE
chr11	117741145	117741333	188	33	95	109	61	38	55	113	132	44	343	105	78	34	104	98	91	1.17741e+08	Tha1	FALSE	TRUE	FALSE
chr11	4968480	4968667	187	174	336	155	58	120	88	128	140	169	141	219	80	134	56	159	160	4.96857e+06	Gas2l1	FALSE	FALSE	TRUE
chr11	29708551	29708738	187	194	197	227	210	202	167	238	291	214	248	208	167	157	177	206	222	2.97086e+07	Eml6	FALSE	TRUE	FALSE
chr11	50192017	50192204	187	261	277	341	395	129	427	421	374	307	765	286	224	181	562	365	300	5.01921e+07	Hnrnph1	TRUE	FALSE	FALSE
chr11	97262568	97262755	187	103	106	156	71	52	105	190	175	87	586	146	76	62	358	162	137	9.72626e+07	Socs7	FALSE	TRUE	FALSE
chr11	105451815	105452002	187	52	195	63	44	45	34	59	61	104	271	105	61	50	79	62	69	1.05452e+08	Tanc2	FALSE	FALSE	TRUE
chr11	106153254	106153441	187	49	78	87	27	33	14	82	102	54	126	83	30	20	36	53	107	1.06153e+08	Gh	FALSE	TRUE	FALSE
chr11	113576491	113576678	187	58	46	45	20	12	38	57	44	47	161	40	28	18	78	36	40	1.13577e+08	Cpsf4l	TRUE	FALSE	FALSE
chr11	5815004	5815190	186	99	111	143	73	53	156	158	184	110	306	121	62	110	206	126	148	5.8151e+06	Gck	TRUE	FALSE	FALSE
chr11	51581845	51582031	186	76	86	38	70	29	19	29	57	57	128	63	54	26	57	52	80	5.15819e+07	Sar1b	FALSE	TRUE	FALSE
chr11	69905607	69905793	186	93	137	137	139	26	179	135	182	83	305	119	88	79	325	123	137	6.99057e+07	Asgr2	TRUE	FALSE	FALSE
chr11	106077710	106077896	186	91	63	100	200	58	108	120	110	72	196	65	106	69	179	61	73	1.06078e+08	Ccdc47	TRUE	FALSE	FALSE
chr11	119072079	119072265	186	48	44	53	59	60	102	76	57	17	165	56	59	45	172	64	57	1.19072e+08	Tbc1d16	TRUE	FALSE	FALSE
chr11	35564202	35564387	185	301	200	166	207	231	114	148	177	299	208	215	201	178	144	177	225	3.55643e+07	Pank3	FALSE	FALSE	FALSE
chr11	55272138	55272323	185	186	264	255	75	59	57	266	270	210	372	211	59	79	70	203	161	5.52722e+07	Atox1	FALSE	TRUE	FALSE
chr11	64330332	64330517	185	62	88	98	50	46	53	123	88	113	94	86	53	70	59	82	87	6.43304e+07	Hs3st3a1	FALSE	TRUE	FALSE
chr11	74646311	74646496	185	12	66	48	63	31	59	63	59	21	109	60	89	59	160	66	46	7.46464e+07	Mnt	TRUE	FALSE	FALSE
chr11	75444195	75444380	185	34	75	85	413	80	119	125	91	65	297	110	258	134	332	123	118	7.54443e+07	Inpp5k	TRUE	FALSE	FALSE
chr11	98925154	98925339	185	96	63	40	113	76	41	23	34	100	27	54	54	93	28	47	38	9.89252e+07	Igfbp4	FALSE	FALSE	TRUE
chr11	101342417	101342602	185	82	134	117	116	90	132	100	151	133	130	131	121	83	136	97	141	1.01342e+08	Rnd2	FALSE	TRUE	FALSE
chr11	51571248	51571432	184	155	77	83	237	284	136	71	97	163	30	80	194	271	121	69	65	5.15713e+07	Sec24a	FALSE	FALSE	FALSE
chr11	51634489	51634673	184	154	110	128	63	55	104	173	131	166	165	136	64	83	157	139	135	5.16346e+07	Phf15	FALSE	TRUE	FALSE
chr11	51780909	51781093	184	76	144	142	292	67	136	177	149	138	536	159	189	95	415	160	161	5.1781e+07	Cdkn2aipnl	TRUE	FALSE	FALSE
chr11	81820387	81820571	184	155	174	248	102	87	90	252	320	197	262	227	85	97	118	252	255	8.18205e+07	Ccl2	FALSE	TRUE	FALSE
chr11	85072451	85072635	184	88	138	99	73	110	60	75	128	109	196	94	71	79	78	84	106	8.50726e+07	D630032N06Rik	FALSE	FALSE	TRUE
chr11	93995812	93995996	184	67	88	110	134	93	85	142	124	89	293	109	124	76	347	115	117	9.39959e+07	Tob1	TRUE	FALSE	FALSE
chr11	94777062	94777246	184	66	118	83	318	42	58	68	114	92	421	108	203	72	234	100	97	9.47772e+07	Col1a1	FALSE	TRUE	FALSE
chr11	105851746	105851930	184	118	38	62	54	36	48	51	80	108	74	72	53	53	48	67	93	1.05852e+08	Ace	FALSE	FALSE	FALSE
chr11	120416360	120416544	184	43	58	66	35	33	39	67	53	13	105	71	52	52	43	52	65	1.20416e+08	Dysfip1	FALSE	TRUE	FALSE
chr11	60312842	60313025	183	14	34	38	25	21	47	60	33	21	105	32	18	11	89	37	29	6.0313e+07	Myo15	TRUE	FALSE	FALSE
chr11	61080344	61080527	183	28	63	50	118	39	41	53	67	43	163	68	104	55	143	65	84	6.10804e+07	Aldh3a2	TRUE	FALSE	FALSE
chr11	77329042	77329225	183	66	115	90	170	59	97	93	119	79	299	97	141	78	257	77	120	7.73291e+07	Abhd15	TRUE	FALSE	FALSE
chr11	83561383	83561566	183	359	364	199	150	112	61	130	197	373	230	265	132	102	108	141	256	8.35615e+07	1100001G20Rik	FALSE	FALSE	FALSE
chr11	83977778	83977961	183	118	57	31	65	48	30	20	18	95	19	36	47	45	33	20	35	8.39778e+07	Gm11437	FALSE	FALSE	FALSE
chr11	100799594	100799777	183	233	247	137	262	355	208	88	131	362	110	177	262	346	219	121	164	1.008e+08	Stat3	FALSE	FALSE	TRUE
chr11	116044744	116044927	183	13	40	13	13	4	5	13	18	7	120	16	17	14	54	12	17	1.16045e+08	Acox1	TRUE	FALSE	FALSE
chr11	38427761	38427943	182	13	7	16	53	106	66	13	30	37	9	26	48	91	64	29	37	3.84278e+07	Gm12130	FALSE	FALSE	FALSE
chr11	59731665	59731847	182	93	64	60	113	156	75	30	61	79	44	59	93	133	56	34	44	5.97317e+07	1700013G23Rik	FALSE	FALSE	FALSE
chr11	117038642	117038824	182	102	115	84	62	48	31	77	112	142	250	85	64	39	69	70	96	1.17039e+08	Sept9	FALSE	TRUE	FALSE
chr11	117815541	117815723	182	4	22	20	6	7	11	27	19	0	150	27	10	10	51	28	19	1.17816e+08	Socs3	FALSE	TRUE	FALSE
chr11	118948830	118949012	182	250	309	394	224	138	416	503	474	339	730	375	171	262	833	426	425	1.18949e+08	Cbx4	TRUE	FALSE	FALSE
chr11	120491834	120492016	182	419	498	547	253	222	569	635	657	405	1037	467	266	385	991	449	513	120491918	Mafg	TRUE	FALSE	FALSE
chr11	35849936	35850117	181	173	156	171	125	107	115	174	211	182	225	158	100	142	129	153	191	3.58501e+07	Odz2	FALSE	TRUE	FALSE
chr11	36034879	36035060	181	25	61	53	145	69	46	71	55	29	136	70	102	52	59	70	68	3.60349e+07	Odz2	FALSE	TRUE	FALSE
chr11	67917071	67917252	181	80	34	30	55	128	53	23	31	55	12	40	66	103	37	25	18	6.79172e+07	Stx8	FALSE	FALSE	TRUE
chr11	70051442	70051623	181	141	144	201	304	85	166	282	206	129	531	166	168	81	491	193	192	7.00515e+07	0610010K14Rik	TRUE	FALSE	FALSE
chr11	70658858	70659039	181	46	50	48	67	43	47	37	52	81	59	51	44	56	106	38	41	7.0659e+07	Rabep1	TRUE	FALSE	FALSE
chr11	96290512	96290693	181	114	137	60	98	110	41	35	55	137	92	112	86	117	72	37	111	9.62906e+07	Gm11529	FALSE	FALSE	FALSE
chr11	112924380	112924561	181	21	98	54	31	18	97	59	59	15	264	57	37	34	141	64	45	1.12924e+08	2610035D17Rik	TRUE	FALSE	FALSE
chr11	120433096	120433277	181	65	69	38	37	34	26	27	47	101	63	37	38	49	19	20	44	1.20433e+08	P4hb	FALSE	FALSE	FALSE
chr11	120683037	120683218	181	78	79	74	54	35	74	77	76	73	167	73	53	75	168	80	56	1.20683e+08	Fasn	TRUE	FALSE	FALSE
chr11	4016771	4016951	180	84	41	92	85	56	110	104	108	73	102	85	81	90	188	92	101	4.01688e+06	Sec14l2	TRUE	FALSE	FALSE
chr11	28243593	28243773	180	23	59	25	93	81	79	17	15	54	13	53	192	79	37	11	21	2.82437e+07	Ccdc85a	FALSE	FALSE	TRUE
chr11	53239484	53239664	180	71	78	64	63	60	39	75	74	75	115	76	47	53	54	80	87	53239592	Leap2	FALSE	TRUE	FALSE
chr11	55031158	55031338	180	245	186	241	224	215	149	269	290	202	394	242	157	145	258	226	284	5.50313e+07	Slc36a1	FALSE	TRUE	FALSE
chr11	65601814	65601994	180	20	50	24	50	12	30	32	29	3	127	32	42	13	118	30	32	6.56019e+07	Map2k4	TRUE	FALSE	FALSE
chr11	97563820	97564000	180	242	360	410	175	140	385	532	451	250	745	414	172	254	590	457	386	9.75639e+07	Psmb3	TRUE	FALSE	FALSE
chr11	102091717	102091897	180	72	36	66	24	16	78	73	70	89	109	56	27	28	83	54	54	1.02092e+08	Hdac5	FALSE	TRUE	FALSE
chr11	115637746	115637926	180	34	116	96	87	42	111	138	93	62	280	110	71	56	243	128	103	1.15638e+08	2310067B10Rik	TRUE	FALSE	FALSE
chr11	8403885	8404064	179	83	102	143	31	35	184	134	190	84	197	126	34	81	275	126	151	8.40396e+06	Tns3	TRUE	FALSE	FALSE
chr11	12099059	12099238	179	90	107	161	96	86	150	171	191	121	225	125	50	99	247	119	148	12099132	Grb10	TRUE	FALSE	FALSE
chr11	28265539	28265718	179	46	39	59	22	16	61	71	72	47	144	67	26	38	189	86	57	2.82656e+07	Ccdc85a	TRUE	FALSE	FALSE
chr11	90203692	90203871	179	91	64	64	59	59	31	74	74	78	130	57	48	50	53	45	78	9.02038e+07	Hlf	FALSE	TRUE	FALSE
chr11	94840357	94840536	179	243	329	521	1217	328	522	696	599	273	1210	464	643	419	1363	600	487	9.48404e+07	Sgca	TRUE	FALSE	FALSE
chr11	101561002	101561181	179	81	88	51	128	70	61	30	65	88	79	68	118	86	119	46	63	1.01561e+08	Dhx8	FALSE	FALSE	TRUE
chr11	62730407	62730585	178	36	120	80	132	53	46	53	70	49	117	112	140	45	101	63	97	6.27305e+07	Cdrt4	FALSE	TRUE	FALSE
chr11	95007512	95007690	178	22	36	42	58	18	48	68	38	22	105	59	31	18	117	69	73	9.50076e+07	Dlx4	TRUE	FALSE	FALSE
chr11	97296544	97296722	178	202	246	233	187	153	171	276	258	178	556	211	164	147	453	208	194	9.72966e+07	Arhgap23	TRUE	FALSE	FALSE
chr11	12374075	12374252	177	51	21	26	132	118	68	33	31	40	12	34	126	145	53	36	31	1.23742e+07	Cobl	FALSE	FALSE	FALSE
chr11	51078047	51078224	177	46	90	58	56	40	20	48	55	109	80	67	51	54	37	41	38	5.10781e+07	Clk4	FALSE	FALSE	TRUE
chr11	72731214	72731391	177	74	102	105	58	36	89	168	95	95	274	100	50	41	142	127	70	7.27313e+07	Zzef1	FALSE	TRUE	FALSE
chr11	76106036	76106213	177	129	131	139	192	125	113	164	157	125	165	151	117	115	120	156	163	7.61061e+07	Nxn	FALSE	FALSE	FALSE
chr11	95171531	95171708	177	75	92	130	202	130	129	164	148	59	302	136	203	138	283	133	151	9.51716e+07	Myst2	TRUE	FALSE	FALSE
chr11	101177436	101177613	177	38	49	64	189	35	61	86	65	34	134	49	96	52	140	50	45	1.01178e+08	Psme3	TRUE	FALSE	FALSE
chr11	115106169	115106346	177	171	269	348	262	187	330	397	439	201	1070	291	206	283	741	283	357	1.15106e+08	Tmem104	TRUE	FALSE	FALSE
chr11	116064516	116064693	177	74	83	44	137	102	67	37	55	48	32	74	110	142	96	67	61	116064619	2310004N24Rik	FALSE	FALSE	FALSE
chr11	49074285	49074461	176	31	40	39	40	16	56	31	56	10	119	39	32	45	110	29	51	4.90744e+07	Mgat1	TRUE	FALSE	FALSE
chr11	54696301	54696477	176	99	129	130	101	56	105	136	158	140	291	133	79	67	107	147	141	5.46964e+07	Hint1	FALSE	TRUE	FALSE
chr11	69499268	69499444	176	91	69	92	68	59	82	67	120	135	119	88	71	85	112	86	101	6.94994e+07	Tnfsf13	FALSE	TRUE	FALSE
chr11	100562787	100562963	176	47	58	59	61	32	70	65	62	54	104	75	62	41	87	68	86	100562855	Dhx58	TRUE	FALSE	FALSE
chr11	101417972	101418148	176	140	217	248	98	75	168	282	298	273	527	271	118	131	341	261	272	1.01418e+08	Nbr1	FALSE	TRUE	FALSE
chr11	113594970	113595146	176	62	130	129	94	37	124	151	132	78	399	124	96	62	203	129	82	1.13595e+08	Cdc42ep4	FALSE	TRUE	FALSE
chr11	115259542	115259718	176	21	43	43	35	16	41	49	52	2	140	52	21	15	65	59	41	1.1526e+08	Ict1	FALSE	TRUE	FALSE
chr11	3932106	3932281	175	109	109	112	89	65	109	138	131	106	240	117	99	104	178	104	124	3.93216e+06	Sec14l4	TRUE	FALSE	FALSE
chr11	16308199	16308374	175	16	3	19	60	141	47	22	28	16	1	23	60	137	35	26	32	1.63083e+07	Sec61g	FALSE	FALSE	FALSE
chr11	20044982	20045157	175	100	45	22	72	103	65	13	27	127	20	30	97	98	31	23	13	2.00451e+07	Actr2	FALSE	FALSE	TRUE
chr11	65620063	65620238	175	85	129	66	49	35	41	45	58	78	112	93	59	52	32	56	78	6.56201e+07	Zkscan6	FALSE	FALSE	TRUE
chr11	82667718	82667893	175	60	41	42	54	88	50	35	51	115	29	49	41	104	34	29	62	8.26678e+07	Rffl	FALSE	FALSE	TRUE
chr11	96684031	96684206	175	130	156	152	132	108	73	130	203	158	391	182	172	138	103	131	203	9.66841e+07	Nfe2l1	FALSE	TRUE	FALSE
chr11	98656337	98656512	175	26	53	52	152	11	62	75	60	20	279	53	71	18	148	64	55	9.86564e+07	Msl1	FALSE	TRUE	FALSE
chr11	100608530	100608705	175	177	110	119	91	53	75	106	148	211	101	109	82	66	71	106	120	1.00609e+08	Kcnh4	FALSE	FALSE	FALSE
chr11	3326244	3326418	174	14	57	51	34	13	29	51	56	8	111	49	29	22	33	36	49	3.3263e+06	Rnf185	FALSE	TRUE	FALSE
chr11	31069638	31069812	174	21	104	95	22	53	61	127	88	33	183	108	43	83	124	102	76	3.10697e+07	Chac2	FALSE	TRUE	FALSE
chr11	42014091	42014265	174	84	85	39	71	100	85	30	39	64	35	58	74	105	38	46	28	4.20142e+07	Gabra1	FALSE	FALSE	FALSE
chr11	54992512	54992686	174	91	132	80	220	186	65	50	74	67	116	141	160	137	116	78	84	5.49926e+07	Slc36a2	FALSE	FALSE	TRUE
chr11	113610135	113610309	174	244	198	286	263	122	241	322	344	361	639	256	169	194	494	265	296	1.1361e+08	Cdc42ep4	TRUE	FALSE	FALSE
chr11	115080731	115080905	174	234	301	346	213	197	232	383	417	348	948	327	196	205	437	326	340	1.15081e+08	Tmem104	TRUE	FALSE	FALSE
chr11	120432496	120432670	174	56	121	70	66	68	51	56	67	49	115	79	64	76	43	54	69	1.20433e+08	P4hb	FALSE	FALSE	TRUE
chr11	5280460	5280633	173	151	102	113	112	142	56	128	120	177	154	123	73	156	98	135	129	5.28054e+06	Znrf3	FALSE	FALSE	FALSE
chr11	50191087	50191260	173	92	83	105	111	64	146	110	117	92	145	96	77	111	187	122	80	5.01912e+07	Hnrnph1	TRUE	FALSE	FALSE
chr11	68912351	68912524	173	116	166	191	464	164	246	239	233	132	498	210	308	141	488	239	229	6.89124e+07	Per1	TRUE	FALSE	FALSE
chr11	69714796	69714969	173	167	142	177	104	69	178	194	210	156	377	120	74	98	276	133	115	6.97149e+07	2810408A11Rik	FALSE	TRUE	FALSE
chr11	69735021	69735194	173	55	63	61	49	28	114	83	65	65	155	73	55	62	177	92	77	6.97351e+07	Eif5a	TRUE	FALSE	FALSE
chr11	75276601	75276774	173	21	34	29	12	6	29	15	42	59	103	21	13	12	56	21	21	75276690	Mir22	TRUE	FALSE	FALSE
chr11	79487855	79488028	173	194	224	223	111	94	144	239	262	210	491	245	87	87	178	246	243	7.9488e+07	Rab11fip4	FALSE	TRUE	FALSE
chr11	86417337	86417510	173	139	48	52	198	325	115	52	52	131	12	72	208	285	94	55	55	8.64174e+07	Vmp1	FALSE	FALSE	FALSE
chr11	88725302	88725475	173	38	54	56	65	41	70	57	76	28	190	60	57	47	188	71	67	8.87254e+07	Akap1	TRUE	FALSE	FALSE
chr11	108704172	108704345	173	57	141	68	215	120	65	59	68	34	125	100	191	130	148	68	125	1.08704e+08	Ccdc46	FALSE	TRUE	FALSE
chr11	113727149	113727322	173	74	94	75	38	21	63	59	87	42	271	65	42	63	102	46	42	1.13727e+08	Sdk2	FALSE	TRUE	FALSE
chr11	118944818	118944991	173	43	104	50	26	23	62	58	51	70	145	56	26	28	76	53	44	1.18945e+08	Cbx4	FALSE	TRUE	FALSE
chr11	18918923	18919095	172	160	233	275	256	150	255	327	330	87	597	233	160	173	578	233	259	1.8919e+07	Meis1	TRUE	FALSE	FALSE
chr11	29513340	29513512	172	135	34	33	125	183	53	34	38	226	17	41	82	124	45	34	26	2.95134e+07	Rps27a	FALSE	FALSE	TRUE
chr11	36963543	36963715	172	64	21	88	327	417	242	87	143	125	19	95	272	451	206	95	122	3.69636e+07	Odz2	FALSE	FALSE	FALSE
chr11	53243809	53243981	172	163	221	183	160	136	121	191	205	180	331	187	156	169	166	165	189	5.32439e+07	Uqcrq	FALSE	TRUE	FALSE
chr11	58088187	58088359	172	28	80	98	65	47	119	53	161	12	252	104	86	62	179	50	105	5.80883e+07	Zfp692	TRUE	FALSE	FALSE
chr11	75236068	75236240	172	236	143	214	185	80	156	223	262	280	248	180	122	100	195	178	210	7.52362e+07	Serpinf1	FALSE	FALSE	FALSE
chr11	79564590	79564762	172	79	66	65	85	70	37	53	77	149	51	64	58	89	55	60	56	7.95646e+07	Mir365-2	FALSE	FALSE	TRUE
chr11	106908223	106908395	172	30	45	46	35	34	50	51	60	42	168	56	34	32	115	51	53	1.06908e+08	Bptf	TRUE	FALSE	FALSE
chr11	117826542	117826714	172	137	171	126	94	75	56	127	147	216	129	148	69	93	73	110	137	1.17827e+08	Socs3	FALSE	FALSE	FALSE
chr11	120390324	120390496	172	121	105	130	104	71	151	134	169	137	345	144	100	96	290	132	179	1.2039e+08	Gcgr	TRUE	FALSE	FALSE
chr11	43164922	43165093	171	287	195	170	308	222	105	114	222	346	127	197	226	190	167	183	166	4.3165e+07	Mir146	FALSE	FALSE	TRUE
chr11	49074557	49074728	171	25	24	31	19	12	61	29	50	27	121	31	19	39	88	25	38	4.90746e+07	Mgat1	TRUE	FALSE	FALSE
chr11	69484894	69485065	171	177	219	252	555	66	178	352	274	185	813	239	339	118	572	295	232	6.9485e+07	Eif4a1	TRUE	FALSE	FALSE
chr11	87515982	87516153	171	64	101	41	69	86	41	31	36	108	38	48	52	67	37	35	35	8.7516e+07	1110028F11Rik	FALSE	FALSE	FALSE
chr11	90528770	90528941	171	104	91	67	121	116	79	53	74	95	75	91	85	100	79	68	109	9.05289e+07	Tom1l1	FALSE	FALSE	TRUE
chr11	98300147	98300318	171	30	36	38	132	34	29	50	41	44	138	34	96	35	113	37	32	9.83003e+07	1810046J19Rik	TRUE	FALSE	FALSE
chr11	98644837	98645008	171	146	122	128	172	89	124	136	155	154	406	122	119	112	296	106	137	98644908	Nr1d1	FALSE	TRUE	FALSE
chr11	116080016	116080187	171	35	66	61	36	17	87	57	74	47	230	85	42	58	196	72	97	1.1608e+08	Cdk3-ps	TRUE	FALSE	FALSE
chr11	117797049	117797220	171	124	127	93	115	142	46	92	91	135	56	113	148	125	46	84	114	117797211	Socs3	FALSE	FALSE	FALSE
chr11	120210934	120211105	171	21	50	59	26	20	70	71	77	32	203	56	20	20	141	52	55	120211012	0610009L18Rik	TRUE	FALSE	FALSE
chr11	16704039	16704209	170	124	71	38	129	119	44	20	57	140	58	56	146	113	84	35	67	1.67041e+07	Egfr	FALSE	FALSE	TRUE
chr11	22872897	22873067	170	173	278	356	199	116	267	515	374	179	1113	311	121	241	735	394	259	2.2873e+07	Zrsr1	TRUE	FALSE	FALSE
chr11	49058012	49058182	170	68	57	41	51	27	44	45	47	76	119	50	43	28	81	58	53	4.90581e+07	Mgat1	FALSE	TRUE	FALSE
chr11	51754232	51754402	170	3	54	33	18	18	31	47	32	23	116	34	22	3	44	27	15	5.17543e+07	Cdkn2aipnl	FALSE	TRUE	FALSE
chr11	75286219	75286389	170	111	109	85	160	124	73	61	95	143	113	97	142	126	102	73	118	7.52863e+07	Tlcd2	FALSE	FALSE	TRUE
chr11	97000561	97000730	169	16	25	18	41	8	19	17	25	14	106	20	32	18	56	12	28	9.70006e+07	Tbkbp1	TRUE	FALSE	FALSE
chr11	98318783	98318952	169	18	52	43	23	9	56	37	63	27	191	40	23	17	185	43	34	98318843	Grb7	TRUE	FALSE	FALSE
chr11	107289408	107289577	169	86	144	94	152	170	111	72	108	169	184	149	154	160	114	90	184	107289465	Pitpnc1	FALSE	FALSE	TRUE
chr11	116067664	116067833	169	4	66	17	13	14	2	13	12	12	104	20	12	21	13	17	10	1.16068e+08	2310004N24Rik	FALSE	FALSE	TRUE
chr11	117176715	117176884	169	30	30	38	23	20	79	42	41	17	94	40	26	27	114	35	49	1.17177e+08	Sept9	TRUE	FALSE	FALSE
chr11	117685982	117686151	169	24	43	44	30	20	53	53	51	42	109	43	35	38	97	46	43	1.17686e+08	Afmid	TRUE	FALSE	FALSE
chr11	120759424	120759593	169	227	198	163	162	111	102	154	161	231	200	187	106	132	107	152	175	1.2076e+08	Ccdc57	FALSE	FALSE	FALSE
chr11	3061273	3061441	168	111	149	112	81	128	93	74	143	138	67	144	90	159	66	90	196	3.06134e+06	Sfi1	FALSE	FALSE	FALSE
chr11	32452749	32452917	168	61	107	189	112	66	158	176	264	101	242	142	94	110	248	134	159	3.24528e+07	Stk10	TRUE	FALSE	FALSE
chr11	43815503	43815671	168	113	73	41	112	69	66	33	50	142	62	69	104	85	98	59	49	4.38155e+07	Adra1b	FALSE	FALSE	TRUE
chr11	59272601	59272769	168	50	142	106	152	112	104	85	88	45	177	161	170	117	113	115	101	5.92727e+07	Jmjd4	FALSE	TRUE	FALSE
chr11	59319384	59319552	168	28	41	37	48	31	58	50	38	27	105	47	36	42	89	59	43	5.93195e+07	4933439C10Rik	TRUE	FALSE	FALSE
chr11	60756250	60756418	168	145	119	85	103	81	55	80	58	83	74	80	74	60	48	61	61	6.07563e+07	Map2k3	FALSE	FALSE	FALSE
chr11	78363079	78363247	168	90	98	96	59	45	50	83	120	136	224	108	59	66	76	93	112	7.83631e+07	Tmem97	FALSE	TRUE	FALSE
chr11	80915164	80915332	168	52	128	82	75	52	48	63	101	56	307	125	90	62	53	76	106	8.09152e+07	Accn1	FALSE	TRUE	FALSE
chr11	108689844	108690012	168	87	82	83	47	36	20	73	101	81	107	96	26	52	45	84	113	1.0869e+08	Ccdc46	FALSE	TRUE	FALSE
chr11	113389878	113390046	168	69	20	64	41	20	53	62	84	103	59	55	40	26	112	52	64	1.1339e+08	Slc39a11	TRUE	FALSE	FALSE
chr11	115023614	115023782	168	21	58	31	48	28	34	30	27	19	121	45	34	22	35	47	24	1.15024e+08	Slc9a3r1	FALSE	TRUE	FALSE
chr11	4597802	4597969	167	79	80	90	44	45	44	86	102	108	72	81	45	54	70	88	85	4.59786e+06	Uqcr10	FALSE	TRUE	FALSE
chr11	11797984	11798151	167	113	120	57	52	103	44	40	34	128	85	72	73	101	53	26	77	1.17981e+07	Ddc	FALSE	FALSE	FALSE
chr11	54918986	54919153	167	167	112	71	98	120	36	72	70	151	85	107	83	116	61	73	105	5.4919e+07	Gm2a	FALSE	FALSE	FALSE
chr11	70223491	70223658	167	24	39	33	122	30	44	46	32	21	131	38	77	25	119	35	36	7.02236e+07	Pelp1	TRUE	FALSE	FALSE
chr11	109899226	109899393	167	205	158	105	280	240	82	81	96	241	76	114	211	244	125	96	72	1.09899e+08	Abca8a	FALSE	FALSE	TRUE
chr11	115323819	115323986	167	32	39	37	25	20	47	38	54	25	100	45	19	38	104	36	59	1.15324e+08	Slc16a5	TRUE	FALSE	FALSE
chr11	117670940	117671107	167	15	24	19	72	14	34	21	29	1	101	25	52	24	75	23	28	1.17671e+08	Syngr2	TRUE	FALSE	FALSE
chr11	118151576	118151743	167	44	102	104	506	120	149	158	102	75	221	101	284	97	217	92	93	118151659	Usp36	TRUE	FALSE	FALSE
chr11	119809732	119809899	167	8	28	26	12	7	22	33	25	20	105	22	18	18	72	29	21	1.1981e+08	Baiap2	TRUE	FALSE	FALSE
chr11	45666079	45666245	166	76	77	62	129	88	77	59	72	104	143	79	114	74	118	62	94	4.56662e+07	Clint1	TRUE	FALSE	FALSE
chr11	50173072	50173238	166	33	35	39	74	19	45	49	48	37	112	52	47	40	158	57	53	5.01732e+07	Mir804	TRUE	FALSE	FALSE
chr11	66860834	66861000	166	84	100	72	86	56	49	68	73	91	160	69	70	56	52	57	70	6.68609e+07	2310004I24Rik	FALSE	TRUE	FALSE
chr11	106860429	106860595	166	15	30	22	69	17	25	27	25	0	108	30	42	11	57	28	44	1.06861e+08	Kpna2	TRUE	FALSE	FALSE
chr11	107125438	107125604	166	111	91	83	39	50	41	78	88	141	95	67	38	74	42	58	93	1.07126e+08	Pitpnc1	FALSE	FALSE	FALSE
chr11	107436459	107436625	166	119	102	71	77	113	124	71	61	96	45	93	65	105	96	77	67	1.07437e+08	Helz	FALSE	FALSE	FALSE
chr11	20924658	20924823	165	123	70	54	89	141	70	33	50	97	25	51	95	160	54	29	35	20924727	Peli1	FALSE	FALSE	TRUE
chr11	20979867	20980032	165	195	41	71	326	355	185	67	93	183	37	84	255	284	126	61	107	2.098e+07	Peli1	FALSE	FALSE	FALSE
chr11	58793329	58793494	165	244	260	247	111	129	248	234	315	222	661	243	149	145	359	220	250	5.87934e+07	Trim11	TRUE	FALSE	FALSE
chr11	60692357	60692522	165	23	26	25	35	17	32	23	35	1	109	28	29	27	98	28	25	6.06924e+07	Tmem11	TRUE	FALSE	FALSE
chr11	62027130	62027295	165	102	46	24	33	26	26	11	22	122	12	31	27	68	17	25	30	6.20272e+07	Specc1	FALSE	FALSE	TRUE
chr11	69232189	69232354	165	15	46	33	30	18	42	37	44	20	124	32	27	18	64	27	36	6.92322e+07	Kdm6b	FALSE	TRUE	FALSE
chr11	82683697	82683862	165	121	66	51	41	64	48	43	38	100	18	51	43	62	27	24	53	8.26838e+07	Rffl	FALSE	FALSE	FALSE
chr11	115138520	115138685	165	191	143	96	119	159	71	66	98	183	75	104	90	149	73	86	108	1.15139e+08	Fdxr	FALSE	FALSE	FALSE
chr11	7052191	7052355	164	29	52	39	25	12	22	42	34	29	144	33	23	23	48	40	30	7.05227e+06	Adcy1	FALSE	TRUE	FALSE
chr11	51076460	51076624	164	11	35	25	80	17	26	25	37	7	136	32	66	17	120	32	20	5.10766e+07	Clk4	TRUE	FALSE	FALSE
chr11	60768056	60768220	164	94	104	77	75	42	39	66	103	81	147	84	75	22	36	53	86	6.07681e+07	Map2k3	FALSE	TRUE	FALSE
chr11	98821006	98821170	164	21	46	32	31	10	48	40	36	24	238	35	31	19	116	32	37	9.88211e+07	Rara	TRUE	FALSE	FALSE
chr11	109857045	109857209	164	90	83	132	67	51	166	174	148	84	263	106	67	101	314	133	95	109857124	Abca8b	TRUE	FALSE	FALSE
chr11	5421577	5421740	163	53	53	72	71	26	83	99	72	105	91	57	57	29	85	59	60	5.42165e+06	Xbp1	TRUE	FALSE	FALSE
chr11	51665607	51665770	163	87	90	125	58	42	58	167	127	101	182	124	40	52	97	122	118	5.16657e+07	Phf15	FALSE	TRUE	FALSE
chr11	51690538	51690701	163	57	100	105	45	45	139	124	124	43	286	101	43	93	268	90	118	5.16906e+07	Phf15	TRUE	FALSE	FALSE
chr11	60512187	60512350	163	45	48	96	27	21	149	133	107	55	223	95	28	34	249	117	99	6.05123e+07	Llgl1	TRUE	FALSE	FALSE
chr11	94201690	94201853	163	44	44	53	19	13	26	49	65	38	145	55	21	20	31	52	59	9.42018e+07	Ankrd40	FALSE	TRUE	FALSE
chr11	100181782	100181945	163	74	102	116	222	80	141	140	138	76	374	128	185	111	381	130	136	1.00182e+08	Eif1	TRUE	FALSE	FALSE
chr11	106129010	106129173	163	25	28	40	15	22	46	32	51	42	70	32	21	33	103	28	38	1.06129e+08	Smarcd2	TRUE	FALSE	FALSE
chr11	109339100	109339263	163	166	155	114	189	179	102	77	125	150	172	123	189	198	165	77	145	1.09339e+08	Arsg	FALSE	FALSE	TRUE
chr11	43705093	43705255	162	150	151	197	235	202	111	214	250	114	296	175	179	176	163	158	230	4.37052e+07	Adra1b	FALSE	TRUE	FALSE
chr11	65619783	65619945	162	102	115	35	45	89	51	19	20	108	26	45	65	52	30	18	20	6.56199e+07	Zkscan6	FALSE	FALSE	FALSE
chr11	77714324	77714486	162	125	102	80	47	88	51	71	88	186	63	95	70	59	57	81	99	7.77144e+07	Pipox	FALSE	FALSE	FALSE
chr11	79559907	79560069	162	111	126	165	92	81	181	200	175	140	172	131	77	83	234	121	123	7.956e+07	Mir365-2	TRUE	FALSE	FALSE
chr11	94436421	94436583	162	136	114	101	50	60	44	89	124	116	180	92	34	66	40	71	104	9.44365e+07	Acsf2	FALSE	FALSE	FALSE
chr11	100366354	100366516	162	177	159	142	96	140	115	103	172	193	241	160	124	111	166	99	185	1.00366e+08	Acly	FALSE	TRUE	FALSE
chr11	106375805	106375967	162	197	161	164	218	156	132	172	191	164	186	184	136	150	119	169	191	1.06376e+08	Tex2	FALSE	FALSE	FALSE
chr11	109567460	109567622	162	274	302	361	448	432	210	400	473	265	619	350	329	321	434	391	408	1.09568e+08	Fam20a	FALSE	TRUE	FALSE
chr11	114536789	114536951	162	58	120	63	291	39	43	75	79	95	497	78	170	48	246	79	70	1.14537e+08	Ttyh2	FALSE	TRUE	FALSE
chr11	5819670	5819831	161	305	279	321	131	175	158	377	368	321	410	320	164	197	210	331	335	5.81976e+06	Gck	FALSE	TRUE	FALSE
chr11	20232624	20232785	161	142	159	224	619	136	233	306	234	180	555	199	344	163	617	227	218	2.02327e+07	Slc1a4	TRUE	FALSE	FALSE
chr11	35854472	35854633	161	68	24	85	59	65	92	100	111	83	57	73	51	54	91	96	84	35854551	Odz2	TRUE	FALSE	FALSE
chr11	44971854	44972015	161	78	16	18	71	92	28	15	25	52	7	23	64	101	44	16	13	4.4972e+07	Gm12159	FALSE	FALSE	TRUE
chr11	51077044	51077205	161	31	63	65	78	51	61	69	85	33	175	65	65	54	134	68	75	5.10771e+07	Clk4	TRUE	FALSE	FALSE
chr11	51637962	51638123	161	50	122	112	100	31	83	136	117	76	383	103	92	58	265	109	73	5.1638e+07	Phf15	TRUE	FALSE	FALSE
chr11	78795717	78795878	161	159	76	50	88	75	59	33	63	172	46	87	109	114	68	59	120	78795868	Lgals9	FALSE	FALSE	TRUE
chr11	83842221	83842382	161	86	61	38	79	54	26	26	23	118	52	50	54	57	25	23	53	8.38423e+07	Synrg	FALSE	FALSE	TRUE
chr11	84336203	84336364	161	319	367	509	1021	451	796	624	591	488	1032	578	1076	731	1342	679	657	8.43363e+07	Lhx1	TRUE	FALSE	FALSE
chr11	97310005	97310166	161	56	31	54	34	31	82	73	65	56	139	64	40	57	152	75	87	9.73101e+07	Arhgap23	TRUE	FALSE	FALSE
chr11	114713075	114713236	161	24	51	38	90	27	60	49	52	25	118	56	96	48	141	60	57	1.14713e+08	Gprc5c	TRUE	FALSE	FALSE
chr11	118989435	118989596	161	17	34	28	12	14	29	23	47	11	113	28	14	12	101	18	28	1.18989e+08	Cbx4	TRUE	FALSE	FALSE
chr11	62748750	62748910	160	198	252	238	319	281	149	213	291	191	308	267	256	277	246	225	284	6.27488e+07	Cdrt4	FALSE	TRUE	FALSE
chr11	70544054	70544214	160	129	135	162	207	129	96	162	220	161	286	169	161	149	135	171	181	7.05441e+07	Kif1c	FALSE	TRUE	FALSE
chr11	83485374	83485534	160	85	68	54	118	91	52	37	63	74	34	65	61	103	58	46	61	83485462	Ccl4	FALSE	FALSE	TRUE
chr11	89993997	89994157	160	117	157	81	139	193	100	62	94	105	82	130	155	138	111	53	132	8.99941e+07	Tmem100	FALSE	FALSE	TRUE
chr11	95275013	95275173	160	87	87	91	119	80	112	92	109	68	168	83	91	76	135	98	87	9.52751e+07	Spop	TRUE	FALSE	FALSE
chr11	99354461	99354621	160	250	311	227	175	137	145	281	214	237	302	219	192	173	213	195	156	9.93545e+07	Krt23	FALSE	TRUE	FALSE
chr11	101148714	101148874	160	234	238	357	237	196	339	464	395	150	529	266	153	226	524	299	276	1.01149e+08	Cntd1	TRUE	FALSE	FALSE
chr11	115024466	115024626	160	51	71	62	88	28	105	76	67	38	113	64	76	49	149	74	59	1.15025e+08	Slc9a3r1	TRUE	FALSE	FALSE
chr11	115308898	115309058	160	95	96	99	67	37	86	77	133	29	201	99	80	63	125	72	129	115308944	Mir3968	TRUE	FALSE	FALSE
chr11	120521325	120521485	160	31	47	35	58	24	22	44	39	36	117	36	40	20	74	38	32	120521409	Notum	FALSE	TRUE	FALSE
chr11	5385917	5386076	159	35	55	85	132	79	101	91	125	49	119	98	99	122	202	107	120	5.38598e+06	Xbp1	TRUE	FALSE	FALSE
chr11	6315306	6315465	159	220	189	201	115	95	233	231	238	231	490	196	86	110	409	243	190	6.3154e+06	Ppia	TRUE	FALSE	FALSE
chr11	43987030	43987189	159	96	83	53	70	81	49	23	49	132	11	61	75	98	39	27	46	4.3987e+07	Il12b	FALSE	FALSE	TRUE
chr11	50139148	50139307	159	111	111	140	372	128	169	206	131	69	140	105	199	122	233	108	93	5.01392e+07	Canx	TRUE	FALSE	FALSE
chr11	57800021	57800180	159	118	110	75	124	109	53	52	85	156	78	103	124	136	107	78	118	5.78001e+07	Larp1	FALSE	FALSE	TRUE
chr11	57824123	57824282	159	65	83	58	29	30	14	53	61	101	72	65	29	55	22	52	61	5.78242e+07	Larp1	FALSE	FALSE	FALSE
chr11	57909259	57909418	159	269	270	237	348	318	188	212	264	328	295	280	279	281	221	232	345	5.79093e+07	Cnot8	FALSE	FALSE	TRUE
chr11	64950910	64951069	159	71	51	132	165	138	113	126	157	113	78	125	120	111	120	131	133	6.4951e+07	Arhgap44	FALSE	FALSE	FALSE
chr11	68893700	68893859	159	87	104	117	42	46	45	102	147	104	136	104	45	50	57	82	92	6.88938e+07	Vamp2	FALSE	TRUE	FALSE
chr11	69520375	69520534	159	18	42	44	17	6	50	35	56	13	141	38	14	11	61	31	36	6.95204e+07	BC096441	FALSE	TRUE	FALSE
chr11	76729234	76729393	159	28	57	60	17	19	29	73	55	46	132	51	26	17	55	50	43	7.67293e+07	Tmigd1	FALSE	TRUE	FALSE
chr11	79955509	79955668	159	32	58	54	60	39	46	65	69	43	178	48	43	34	95	51	60	7.99556e+07	1110002N22Rik	FALSE	TRUE	FALSE
chr11	90202404	90202563	159	43	70	52	25	14	17	29	61	42	117	46	18	17	23	24	46	90202456	Hlf	FALSE	TRUE	FALSE
chr11	95640190	95640349	159	212	202	158	107	101	78	156	170	227	148	183	90	94	68	152	177	9.56402e+07	Zfp652	FALSE	FALSE	FALSE
chr11	105919451	105919610	159	76	98	76	89	126	95	47	100	77	61	91	73	121	79	42	133	1.0592e+08	Dcaf7	FALSE	FALSE	FALSE
chr11	108719366	108719525	159	136	102	144	99	117	81	158	153	88	120	125	83	122	83	100	152	1.08719e+08	Ccdc46	FALSE	TRUE	FALSE
chr11	109286971	109287130	159	73	102	107	171	53	99	143	123	50	285	94	117	77	268	100	92	1.09287e+08	Amz2	TRUE	FALSE	FALSE
chr11	5409910	5410068	158	115	125	128	75	119	55	114	142	79	166	164	85	94	111	141	182	5.41001e+06	Xbp1	FALSE	TRUE	FALSE
chr11	16720258	16720416	158	167	225	117	407	290	157	120	108	173	168	175	307	197	214	134	159	1.67203e+07	Egfr	FALSE	FALSE	TRUE
chr11	32124922	32125080	158	215	177	299	89	72	249	379	337	237	525	289	92	157	566	380	261	3.2125e+07	Mpg	TRUE	FALSE	FALSE
chr11	63691701	63691859	158	116	97	98	105	103	40	93	102	122	121	114	91	89	81	122	103	6.36918e+07	Hs3st3b1	FALSE	FALSE	FALSE
chr11	117199880	117200038	158	7	19	34	16	11	59	39	44	11	80	37	15	31	138	42	52	1.172e+08	Sept9	TRUE	FALSE	FALSE
chr11	4013635	4013792	157	29	56	41	14	12	63	48	57	48	133	46	13	31	91	46	47	4.01371e+06	Sec14l2	TRUE	FALSE	FALSE
chr11	11862707	11862864	157	62	102	52	87	27	26	28	50	60	77	79	41	62	40	70	55	1.18628e+07	Grb10	FALSE	FALSE	TRUE
chr11	20442429	20442586	157	50	41	54	107	33	39	65	61	34	138	45	52	19	130	42	58	2.04425e+07	Sertad2	TRUE	FALSE	FALSE
chr11	74463826	74463983	157	117	99	107	46	45	122	94	118	132	75	103	58	82	106	108	102	7.44639e+07	1300001I01Rik	FALSE	TRUE	FALSE
chr11	98448690	98448847	157	58	173	81	87	34	75	94	72	65	183	95	71	59	119	73	81	9.84487e+07	Ormdl3	FALSE	TRUE	FALSE
chr11	101163567	101163724	157	61	83	80	178	85	128	100	90	57	237	81	136	94	220	74	93	1.01164e+08	Becn1	TRUE	FALSE	FALSE
chr11	109472420	109472577	157	8	58	25	60	12	33	33	21	28	177	35	49	13	84	31	32	1.09472e+08	Wipi1	FALSE	TRUE	FALSE
chr11	118150990	118151147	157	21	53	47	50	20	27	57	57	78	176	54	53	31	80	53	45	1.18151e+08	Usp36	FALSE	TRUE	FALSE
chr11	3795157	3795313	156	34	29	49	36	16	75	63	46	69	142	44	27	41	163	51	47	3795253	Dusp18	TRUE	FALSE	FALSE
chr11	7053192	7053348	156	175	100	61	140	175	87	48	33	122	47	72	114	162	78	44	42	7.05327e+06	Adcy1	FALSE	FALSE	TRUE
chr11	21271131	21271287	156	15	26	22	61	6	26	29	28	11	111	24	38	26	104	30	22	2.12712e+07	Ugp2	TRUE	FALSE	FALSE
chr11	51466665	51466821	156	184	105	114	62	43	32	96	128	289	182	112	68	35	52	114	105	5.14667e+07	N4bp3	FALSE	FALSE	FALSE
chr11	59628086	59628242	156	73	101	97	60	93	90	100	117	82	132	103	47	79	111	114	91	5.96282e+07	Flcn	TRUE	FALSE	FALSE
chr11	69867411	69867567	156	235	218	223	184	216	152	245	270	278	264	243	151	205	171	233	252	6.98675e+07	Asgr1	FALSE	TRUE	FALSE
chr11	72395653	72395809	156	174	157	260	110	103	276	286	319	199	300	226	90	140	339	251	269	7.23957e+07	Ube2g1	TRUE	FALSE	FALSE
chr11	78158655	78158811	156	93	113	123	64	74	112	136	155	93	254	124	68	135	240	116	139	7.81587e+07	Unc119	TRUE	FALSE	FALSE
chr11	90178476	90178632	156	120	93	143	45	34	133	152	195	112	321	133	33	66	255	166	124	9.01786e+07	Mmd	FALSE	TRUE	FALSE
chr11	115780532	115780688	156	94	120	56	50	94	45	52	51	139	135	84	43	90	76	55	80	1.15781e+08	Recql5	FALSE	TRUE	FALSE
[truncated: 9,317 more rows]
