# Supplementary material for: Temporal mapping of CEBPA and CEBPB binding during liver regeneration reveals dynamic occupancy and specific regulatory codes for homeostatic and cell cycle gene batteries
Source: HighWire-hosted journal article supplement (doi:10.1101/gr.146399.112), 2013-02-12
Supplement: Supp_Table_S5.xlsx [file Supp_Table_S5.xlsx]

## Sheet: A-up_0-3
Jakobsen_Table S5
Category	Term	Count	%	PValue	Benjamini-Corrected PValue	Genes	List Total	Pop Hits	Pop Total	Fold Enrichment
GOTERM_BP_FAT	GO:0019318~hexose metabolic process	14	2.57827	0.000935012	0.255452	B4GALT1, ADPGK, PFKFB3, PGD, FBP1, ATF4, PCX, ATF3, NISCH, PPP1R3B, H6PD, GNMT, PGK1, FABP5	381	169	13588	2.95442
GOTERM_BP_FAT	GO:0012501~programmed cell death	27	4.97238	0.000822237	0.267479	1810011O10RIK, FKBP8, GGCT, LITAF, EIF5A, BCL2L1, UBQLN1, SHB, TNFRSF1A, NISCH, BAG3, ZC3H12A, DAP, EPO, PDCD10, TBRG4, FADD, CIDEC, DDIT4, HIPK3, GADD45G, MFSD10, PDCD6IP, GADD45B, PPP1R15A, TRIM39, NEK6	381	473	13588	2.03579
GOTERM_BP_FAT	GO:0016265~death	29	5.3407	0.000698936	0.281588	1810011O10RIK, FKBP8, GGCT, LITAF, CLU, EIF5A, BCL2L1, UBQLN1, SHB, TNFRSF1A, TNFRSF1B, NISCH, BAG3, ZC3H12A, DAP, EPO, PDCD10, TBRG4, FADD, DDIT4, CIDEC, HIPK3, GADD45G, MFSD10, PDCD6IP, GADD45B, PPP1R15A, TRIM39, NEK6	381	519	13588	1.99279
GOTERM_BP_FAT	GO:0006399~tRNA metabolic process	11	2.02578	0.00125001	0.286856	TARS, GTPBP3, NARS, RPP21, CLP1, CTU2, FARSB, GARS, FARSA, DUS3L, MARS	381	113	13588	3.47172
GOTERM_BP_FAT	GO:0051726~regulation of cell cycle	15	2.76243	0.00282036	0.317294	E2F4, CHEK1, BOP1, JUNB, LIF, ATF5, CDKN1A, GADD45G, MNT, FBXO31, E4F1, SIK1, GADD45B, GADD45A, NEK6	381	214	13588	2.49982
GOTERM_BP_FAT	GO:0045184~establishment of protein localization	32	5.89319	0.00304088	0.318965	SRP14, SDAD1, SEC24A, NFKBIA, EIF5A, LMAN2, VPS33A, SEC62, DUSP18, TOMM6, COPB1, PEX16, RAB11A, STX11, KPNB1, SEC61A1, HSPA9, RRBP1, TOMM40, MYH9, GABARAP, YWHAG, RAB30, TOMM20, RAB14, BET1L, GOSR1, PDCD6IP, COPG, KPNA2, MON1A, SSR3	381	656	13588	1.73971
GOTERM_BP_FAT	GO:0034660~ncRNA metabolic process	15	2.76243	0.00165336	0.323851	GTPBP3, NARS, RPP21, EXOSC5, GARS, MPHOSPH10, BOP1, TARS, CLP1, CTU2, FARSB, TFB2M, FARSA, MARS, DUS3L	381	202	13588	2.64832
GOTERM_BP_FAT	GO:0006915~apoptosis	27	4.97238	0.00063718	0.331003	1810011O10RIK, FKBP8, GGCT, LITAF, EIF5A, BCL2L1, UBQLN1, SHB, TNFRSF1A, NISCH, BAG3, ZC3H12A, DAP, EPO, PDCD10, TBRG4, FADD, CIDEC, DDIT4, HIPK3, GADD45G, MFSD10, PDCD6IP, GADD45B, PPP1R15A, TRIM39, NEK6	381	465	13588	2.07082
GOTERM_BP_FAT	GO:0006006~glucose metabolic process	12	2.20994	0.00191451	0.331593	PCX, ATF4, NISCH, ATF3, PPP1R3B, H6PD, ADPGK, PGD, FBP1, GNMT, PGK1, FABP5	381	140	13588	3.05692
GOTERM_BP_FAT	GO:0005996~monosaccharide metabolic process	14	2.57827	0.00280284	0.335349	B4GALT1, ADPGK, PFKFB3, PGD, FBP1, ATF4, PCX, ATF3, NISCH, PPP1R3B, H6PD, GNMT, PGK1, FABP5	381	191	13588	2.61412
GOTERM_BP_FAT	GO:0046165~alcohol biosynthetic process	6	1.10497	0.00347672	0.337569	PCX, ATF4, ATF3, GOT1, PGD, FBP1	381	37	13588	5.78336
GOTERM_BP_FAT	GO:0016051~carbohydrate biosynthetic process	9	1.65746	0.00220399	0.341279	B4GALT1, PCX, ATF4, ATF3, GOT1, B3GALT6, CHST12, PGD, FBP1	381	83	13588	3.86719
GOTERM_BP_FAT	GO:0050727~regulation of inflammatory response	7	1.28913	0.00501395	0.350975	ZFP36, TNFRSF1A, ADRB2, SBNO2, TNFRSF1B, TGM2, SERPING1	381	57	13588	4.37979
GOTERM_BP_FAT	GO:0006396~RNA processing	24	4.41989	0.00275575	0.352793	ZFP36, GM7551, GTPBP3, RPP21, HNRNPA2B1, EXOSC5, MPHOSPH10, SF1, BOP1, WBP4, SLBP, CLP1, HNRNPF, PCBP1, CTU2, ISY1, 2510012J08RIK, LSM4, TFB2M, LSM3, PRPF38B, MRPL44, RBM17, DUS3L	381	437	13588	1.95867
GOTERM_BP_FAT	GO:0070727~cellular macromolecule localization	18	3.31492	0.00484553	0.354429	SRP14, SEC24A, NFKBIA, TOMM40, DUSP18, YWHAG, COPB1, PEX16, TOMM20, GOSR1, STX11, COPG, COX18, KPNB1, KPNA2, SEC61A1, HSPA9, SSR3	381	301	13588	2.13273
GOTERM_BP_FAT	GO:0006886~intracellular protein transport	17	3.13076	0.00483212	0.367596	SRP14, SEC24A, NFKBIA, TOMM40, DUSP18, YWHAG, COPB1, PEX16, TOMM20, GOSR1, STX11, COPG, KPNB1, KPNA2, SEC61A1, HSPA9, SSR3	381	276	13588	2.1967
GOTERM_BP_FAT	GO:0034637~cellular carbohydrate biosynthetic process	7	1.28913	0.00459182	0.367643	B4GALT1, PCX, ATF4, ATF3, GOT1, PGD, FBP1	381	56	13588	4.45801
GOTERM_BP_FAT	GO:0008219~cell death	29	5.3407	0.000484487	0.367728	1810011O10RIK, FKBP8, GGCT, LITAF, CLU, EIF5A, BCL2L1, UBQLN1, SHB, TNFRSF1A, TNFRSF1B, NISCH, BAG3, ZC3H12A, DAP, EPO, PDCD10, TBRG4, FADD, DDIT4, CIDEC, HIPK3, GADD45G, MFSD10, PDCD6IP, GADD45B, PPP1R15A, TRIM39, NEK6	381	507	13588	2.03996
GOTERM_BP_FAT	GO:0006605~protein targeting	11	2.02578	0.00416031	0.371226	SRP14, DUSP18, YWHAG, PEX16, TOMM20, TOMM40, NFKBIA, KPNA2, KPNB1, SSR3, HSPA9	381	133	13588	2.94966
GOTERM_BP_FAT	GO:0015031~protein transport	32	5.89319	0.00270881	0.372836	SRP14, SDAD1, SEC24A, NFKBIA, EIF5A, LMAN2, VPS33A, SEC62, DUSP18, TOMM6, COPB1, PEX16, RAB11A, STX11, KPNB1, SEC61A1, HSPA9, RRBP1, TOMM40, MYH9, GABARAP, YWHAG, RAB30, TOMM20, RAB14, BET1L, GOSR1, PDCD6IP, COPG, KPNA2, MON1A, SSR3	381	651	13588	1.75307
GOTERM_BP_FAT	GO:0034613~cellular protein localization	18	3.31492	0.00458398	0.38303	SRP14, SEC24A, NFKBIA, TOMM40, DUSP18, YWHAG, COPB1, PEX16, TOMM20, GOSR1, STX11, COPG, COX18, KPNB1, KPNA2, SEC61A1, HSPA9, SSR3	381	299	13588	2.147
GOTERM_BP_FAT	GO:0006412~translation	22	4.05157	0.000256552	0.384585	MRPL4, NARS, GARS, RPL36, EIF5A, IGHMBP2, EIF4G2, TARS, MRPS18B, RPL18A, RPL34, RPL9, EIF2S2, RPS15, EIF4A1, FARSB, RPL3, MRPL55, FARSA, RPS11, KPNA2, MARS	381	319	13588	2.45959
GOTERM_BP_FAT	GO:0043038~amino acid activation	6	1.10497	0.00891243	0.50626	TARS, NARS, FARSB, GARS, FARSA, MARS	381	46	13588	4.65183
GOTERM_BP_FAT	GO:0043039~tRNA aminoacylation	6	1.10497	0.00891243	0.50626	TARS, NARS, FARSB, GARS, FARSA, MARS	381	46	13588	4.65183
GOTERM_BP_FAT	GO:0006418~tRNA aminoacylation for protein translation	6	1.10497	0.00891243	0.50626	TARS, NARS, FARSB, GARS, FARSA, MARS	381	46	13588	4.65183
GOTERM_BP_FAT	GO:0010498~proteasomal protein catabolic process	5	0.92081	0.00928437	0.506347	HSP90B1, RAD23A, UBE2G2, FBXO31, EDEM1	381	30	13588	5.94401
GOTERM_BP_FAT	GO:0043161~proteasomal ubiquitin-dependent protein catabolic process	5	0.92081	0.00928437	0.506347	HSP90B1, RAD23A, UBE2G2, FBXO31, EDEM1	381	30	13588	5.94401
GOTERM_BP_FAT	GO:0010608~posttranscriptional regulation of gene expression	11	2.02578	0.00870761	0.512971	ZFP36, SRP14, EIF4G2, EIF4EBP1, TNFRSF1B, CLP1, IMPACT, TBRG1, EIF5A, MAPKAPK2, PPP1R15A	381	148	13588	2.65071
GOTERM_BP_FAT	GO:0046907~intracellular transport	22	4.05157	0.0098846	0.514644	SRP14, SEC24A, NFKBIA, TOMM40, 2510003E04RIK, MYH9, DUSP18, YWHAG, AAAS, COPB1, 0610009B22RIK, PEX16, TBRG1, TOMM20, GOSR1, STX11, COPG, KPNB1, KPNA2, SEC61A1, HSPA9, SSR3	381	431	13588	1.82044
GOTERM_BP_FAT	GO:0046364~monosaccharide biosynthetic process	5	0.92081	0.0104296	0.520342	PCX, ATF4, ATF3, PGD, FBP1	381	31	13588	5.75226
GOTERM_BP_FAT	GO:0016071~mRNA metabolic process	17	3.13076	0.0110569	0.528243	ZFP36, GM7551, HNRNPA2B1, SF1, MAPKAPK2, WBP4, 1200011M11RIK, SLBP, CLP1, PCBP1, HNRNPF, ISY1, 2510012J08RIK, LSM4, LSM3, PRPF38B, RBM17	381	302	13588	2.00758
GOTERM_BP_FAT	GO:0008104~protein localization	33	6.07735	0.0120835	0.54758	SRP14, SDAD1, SEC24A, NFKBIA, EIF5A, LMAN2, VPS33A, SEC62, DUSP18, TOMM6, COPB1, PEX16, RAB11A, COX18, STX11, KPNB1, SEC61A1, HSPA9, RRBP1, TOMM40, MYH9, GABARAP, YWHAG, RAB30, TOMM20, RAB14, BET1L, GOSR1, PDCD6IP, COPG, KPNA2, MON1A, SSR3	381	753	13588	1.56297
GOTERM_BP_FAT	GO:0006397~mRNA processing	15	2.76243	0.0156019	0.629062	ZFP36, GM7551, HNRNPA2B1, SF1, WBP4, SLBP, PCBP1, HNRNPF, CLP1, ISY1, 2510012J08RIK, LSM4, LSM3, PRPF38B, RBM17	381	262	13588	2.04183
GOTERM_BP_FAT	GO:0006094~gluconeogenesis	4	0.736648	0.0173745	0.633915	PCX, ATF4, ATF3, FBP1	381	20	13588	7.13281
GOTERM_BP_FAT	GO:0042692~muscle cell differentiation	9	1.65746	0.0168911	0.634765	ACTG1, SDC1, FOXF1A, XIRP1, AGT, SEMA4C, RCAN1, MYH9, IFRD1	381	117	13588	2.74339
GOTERM_BP_FAT	GO:0042127~regulation of cell proliferation	25	4.60405	0.0165394	0.638639	SAT1, FOSL2, E2F4, CLU, NFKBIA, BCL2L1, LIF, KISS1, CDKN2B, AGT, HMOX1, TGM2, B4GALT1, IRS2, SF1, SMAD1, ATF5, CDKN1A, ADRB2, NUPR1, XIRP1, GRN, TBRG1, MAB21L2, KLF4	381	538	13588	1.65725
GOTERM_BP_FAT	GO:0008380~RNA splicing	12	2.20994	0.025956	0.768563	GM7551, CLP1, HNRNPF, HNRNPA2B1, ISY1, SF1, 2510012J08RIK, LSM4, LSM3, WBP4, PRPF38B, RBM17	381	201	13588	2.1292
GOTERM_BP_FAT	GO:0017038~protein import	7	1.28913	0.0271634	0.774331	DUSP18, PEX16, TOMM20, TOMM40, NFKBIA, KPNA2, KPNB1	381	82	13588	3.04449
GOTERM_BP_FAT	GO:0044092~negative regulation of molecular function	9	1.65746	0.0319787	0.810232	ADRB2, CDKN1A, HIPK3, HMOX1, GADD45G, NR4A1, NFKBIA, GADD45B, GADD45A	381	132	13588	2.43164
GOTERM_BP_FAT	GO:0002064~epithelial cell development	4	0.736648	0.0316452	0.815484	B4GALT1, E2F4, XBP1, AGT	381	25	13588	5.70625
GOTERM_BP_FAT	GO:0019319~hexose biosynthetic process	4	0.736648	0.0316452	0.815484	PCX, ATF4, ATF3, FBP1	381	25	13588	5.70625
GOTERM_BP_FAT	GO:0006090~pyruvate metabolic process	4	0.736648	0.0316452	0.815484	PCX, ATF4, ATF3, FBP1	381	25	13588	5.70625
GOTERM_BP_FAT	GO:0051094~positive regulation of developmental process	12	2.20994	0.0384378	0.843386	LIF, B4GALT1, ADRB2, HSP90AA1, SOCS2, SOCS3, LIMK1, FST, CLU, IL4RA, SMAD1, JUNB	381	214	13588	1.99985
GOTERM_BP_FAT	GO:0022900~electron transport chain	8	1.4733	0.0376471	0.844581	NDUFA4, NDUFS6, UQCR10, NDUFS5, TXN2, DLD, SDHD, UQCRFS1	381	112	13588	2.54743
GOTERM_BP_FAT	GO:0043066~negative regulation of apoptosis	13	2.39411	0.0367062	0.844633	CEBPB, CLU, BCL2L1, BDKRB2, CSDA, ATF5, CDKN1A, BTG2, AGT, BAG3, BCL3, APBB3, PIK3R1	381	239	13588	1.93989
GOTERM_BP_FAT	GO:0060548~negative regulation of cell death	13	2.39411	0.0430029	0.855434	CEBPB, CLU, BCL2L1, BDKRB2, CSDA, ATF5, CDKN1A, BTG2, AGT, BAG3, BCL3, APBB3, PIK3R1	381	245	13588	1.89238
GOTERM_BP_FAT	GO:0008286~insulin receptor signaling pathway	4	0.736648	0.0424068	0.858012	IRS2, EIF4EBP1, PTPN1, PIK3R1	381	28	13588	5.09486
GOTERM_BP_FAT	GO:0006730~one-carbon metabolic process	8	1.4733	0.0458982	0.861302	MTHFD2, ALDH1L1, BTG2, MAT1A, CTCFL, TFB2M, GNMT, FPGS	381	117	13588	2.43857
GOTERM_BP_FAT	GO:0043069~negative regulation of programmed cell death	13	2.39411	0.0419069	0.861314	CEBPB, CLU, BCL2L1, BDKRB2, CSDA, ATF5, CDKN1A, BTG2, AGT, BAG3, BCL3, APBB3, PIK3R1	381	244	13588	1.90013
GOTERM_BP_FAT	GO:0008283~cell proliferation	13	2.39411	0.0453314	0.863961	GNAT1, IRS2, CEBPB, FST, DPH1, BCL2L1, BOP1, NUMBL, SHB, TNFRSF1B, AGT, RAP1B, SCARB1	381	247	13588	1.87705
GOTERM_BP_FAT	GO:0008285~negative regulation of cell proliferation	12	2.20994	0.05048	0.870196	B4GALT1, KISS1, CDKN1A, NUPR1, CDKN2B, XIRP1, AGT, HMOX1, TBRG1, SF1, SMAD1, KLF4	381	224	13588	1.91057
GOTERM_BP_FAT	GO:0031348~negative regulation of defense response	4	0.736648	0.0504694	0.875659	ZFP36, ADRB2, TNFRSF1B, SERPING1	381	30	13588	4.75521
GOTERM_BP_FAT	GO:0030433~ER-associated protein catabolic process	3	0.552486	0.049642	0.876834	HSP90B1, UBE2G2, EDEM1	381	13	13588	8.23016
GOTERM_BP_FAT	GO:0006760~folic acid and derivative metabolic process	3	0.552486	0.049642	0.876834	MTHFD2, ALDH1L1, FPGS	381	13	13588	8.23016
GOTERM_BP_FAT	GO:0030220~platelet formation	2	0.368324	0.0551516	0.878106	MYH9, VPS33A	381	2	13588	35.664
GOTERM_BP_FAT	GO:0033365~protein localization in organelle	7	1.28913	0.0544683	0.879889	SRP14, DUSP18, TOMM20, TOMM40, NFKBIA, KPNA2, KPNB1	381	97	13588	2.57369
GOTERM_BP_FAT	GO:0006469~negative regulation of protein kinase activity	5	0.92081	0.0537889	0.881738	CDKN1A, HIPK3, GADD45G, GADD45B, GADD45A	381	51	13588	3.49647
GOTERM_BP_FAT	GO:0033673~negative regulation of kinase activity	5	0.92081	0.0537889	0.881738	CDKN1A, HIPK3, GADD45G, GADD45B, GADD45A	381	51	13588	3.49647
GOTERM_BP_FAT	GO:0051348~negative regulation of transferase activity	5	0.92081	0.0603974	0.896346	CDKN1A, HIPK3, GADD45G, GADD45B, GADD45A	381	53	13588	3.36453
GOTERM_BP_FAT	GO:0046546~development of primary male sexual characteristics	5	0.92081	0.0603974	0.896346	HMGB2, SF1, BCL2L1, CSDA, GJB2	381	53	13588	3.36453
GOTERM_BP_FAT	GO:0006091~generation of precursor metabolites and energy	13	2.39411	0.0633881	0.903454	NDUFA4, ADPGK, TXN2, UQCRFS1, NDUFS6, UQCR10, NDUFS5, PPP1R3B, GOT1, DLD, SDHD, GNMT, PGK1	381	261	13588	1.77637
GOTERM_BP_FAT	GO:0006457~protein folding	8	1.4733	0.0656588	0.907402	FKBP8, HSP90B1, DNAJB9, HSP90AA1, TOR1A, FKBP3, CANX, HSPA9	381	127	13588	2.24655
GOTERM_BP_FAT	GO:0007548~sex differentiation	8	1.4733	0.0724521	0.91035	B4GALT1, HMGB2, AGT, FST, SF1, BCL2L1, CSDA, GJB2	381	130	13588	2.19471
GOTERM_BP_FAT	GO:0002526~acute inflammatory response	6	1.10497	0.0763345	0.911357	B4GALT1, ORM1, NUPR1, F2, SERPING1, ORM2	381	81	13588	2.64178
GOTERM_BP_FAT	GO:0043487~regulation of RNA stability	3	0.552486	0.0723168	0.913592	ZFP36, TNFRSF1B, MAPKAPK2	381	16	13588	6.68701
GOTERM_BP_FAT	GO:0051186~cofactor metabolic process	10	1.84162	0.0699384	0.913673	MTHFD2, ALAS1, GGT6, ALDH1L1, H6PD, HMOX1, PGD, SDHD, FPGS, SCP2	381	182	13588	1.95956
GOTERM_BP_FAT	GO:0034470~ncRNA processing	9	1.65746	0.0759736	0.913771	GTPBP3, RPP21, CLP1, CTU2, EXOSC5, MPHOSPH10, TFB2M, BOP1, DUS3L	381	158	13588	2.0315
GOTERM_BP_FAT	GO:0032101~regulation of response to external stimulus	7	1.28913	0.0688167	0.913938	ZFP36, TNFRSF1A, ADRB2, SBNO2, TNFRSF1B, TGM2, SERPING1	381	103	13588	2.42377
GOTERM_BP_FAT	GO:0046661~male sex differentiation	5	0.92081	0.0748374	0.913952	HMGB2, SF1, BCL2L1, CSDA, GJB2	381	57	13588	3.12842
GOTERM_BP_FAT	GO:0042770~DNA damage response, signal transduction	5	0.92081	0.0748374	0.913952	NUPR1, HMOX1, BCL3, FBXO31, CHEK1	381	57	13588	3.12842
GOTERM_BP_FAT	GO:0045137~development of primary sexual characteristics	7	1.28913	0.0714019	0.914472	HMGB2, AGT, FST, SF1, BCL2L1, CSDA, GJB2	381	104	13588	2.40046
GOTERM_BP_FAT	GO:0007242~intracellular signaling cascade	34	6.26151	0.0795192	0.916958	ADCY1, RASGEF1B, TNFSF14, CHEK1, LIF, NISCH, HMOX1, TGM2, RAB11A, MT1, BCL3, SIK1, ZFP36, GNAT1, DVL2, CNKSR1, SOCS2, PIK3C2A, SOCS3, RCAN1, SMAD1, RASL12, GUCY2D, SH2D3C, ADRB2, RAB30, NUPR1, GADD45G, RAB14, FBXO31, JAK1, RAP1B, GADD45B, ARL4C	381	915	13588	1.32522
GOTERM_BP_FAT	GO:0050779~RNA destabilization	2	0.368324	0.081579	0.919198	ZFP36, TNFRSF1B	381	3	13588	23.776
GOTERM_BP_FAT	GO:0060708~spongiotrophoblast differentiation	2	0.368324	0.081579	0.919198	LIF, SOCS3	381	3	13588	23.776
GOTERM_BP_FAT	GO:0045444~fat cell differentiation	5	0.92081	0.0908535	0.934811	SCD1, STEAP4, ADRB2, CEBPB, 1100001G20RIK	381	61	13588	2.92328
GOTERM_BP_FAT	GO:0007049~cell cycle	24	4.41989	0.0907186	0.937223	MAD1L1, E2F4, SF1, CHEK1, PIM3, 1700017B05RIK, MYH9, UBE2C, GAK, CDKN1A, TSPYL2, PLK3, CDKN2B, MAPK6, MAP3K8, TBRG1, FBXO31, ZFP830, E4F1, PDCD6IP, MAD2L2, SIK1, GADD45A, NEK6	381	611	13588	1.40088
GOTERM_BP_FAT	GO:0008584~male gonad development	4	0.736648	0.0948333	0.937477	HMGB2, SF1, BCL2L1, CSDA	381	39	13588	3.65785
GOTERM_BP_FAT	GO:0046677~response to antibiotic	3	0.552486	0.0976194	0.937734	DUSP18, HIAT1, JAK1	381	19	13588	5.63116
GOTERM_BP_FAT	GO:0042981~regulation of apoptosis	22	4.05157	0.0963254	0.937793	B4GALT1, CEBPB, CLU, NR4A1, FADD, BDKRB2, BCL2L1, CSDA, CIDEC, ATF5, ADRB2, CDKN1A, BTG2, NUPR1, BAG3, AGT, HMOX1, TGM2, MNT, BCL3, APBB3, PIK3R1	381	553	13588	1.41882
GOTERM_BP_FAT	GO:0032268~regulation of cellular protein metabolic process	13	2.39411	0.0937197	0.937892	SRP14, SOCS3, IMPACT, EIF5A, SERPING1, BDKRB2, UBQLN1, LIF, EIF4G2, EIF4EBP1, HIPK3, PPP1R15A, CBS	381	280	13588	1.65583

## Sheet: A-down_0-3
Category	Term	Count	%	PValue	Benjamini-Corrected PValue	Genes	List Total	Pop Hits	Pop Total	Fold Enrichment
GOTERM_BP_FAT	GO:0009309~amine biosynthetic process	13	1.9174	5.53144e-06	0.0118605	CHDH, BHMT2, BCAT2, PAH, AGMAT, AGXT, MTHFD1, PYCR1, CTH, ALDH4A1, THNSL2, ADC, PRODH	461	73	13588	5.24898
GOTERM_BP_FAT	GO:0008652~cellular amino acid biosynthetic process	10	1.47493	1.33281e-05	0.0142717	MTHFD1, PYCR1, CTH, BHMT2, BCAT2, ALDH4A1, PAH, THNSL2, AGXT, PRODH	461	44	13588	6.69888
GOTERM_BP_FAT	GO:0035295~tube development	24	3.53982	3.30751e-05	0.0235008	CEBPA, TBX3, BTRC, ESR1, SMAD3, ZEB2, FZD3, NR3C1, NR4A3, CXCL12, GJA5, LGR4, FOXP1, TNS3, HHEX, HIF1A, SP1, NCOA3, LHX1, TRP63, HSD11B1, FOXC1, IPMK, NFIB	461	264	13588	2.67955
GOTERM_BP_FAT	GO:0042593~glucose homeostasis	9	1.32743	4.80746e-05	0.0255917	CYB5R4, G6PC, HIF1A, GCK, INPP5K, SLC37A4, ADRA1B, MLXIPL, FOXO3	461	40	13588	6.63189
GOTERM_BP_FAT	GO:0033500~carbohydrate homeostasis	9	1.32743	4.80746e-05	0.0255917	CYB5R4, G6PC, HIF1A, GCK, INPP5K, SLC37A4, ADRA1B, MLXIPL, FOXO3	461	40	13588	6.63189
GOTERM_BP_FAT	GO:0006357~regulation of transcription from RNA polymerase II promoter	41	6.0472	5.93438e-05	0.0252767	GLIS3, ZFP395, HTATIP2, THRB, FOXK1, CBX4, PAX4, FOXO3, TCF7L2, ARID2, CITED2, TRP63, PER2, BCL6, NR2F2, NFX1, SREBF1, CEBPA, WDTC1, JARID2, CREBBP, MLXIPL, SMAD3, TLE4, NR4A3, VSX2, HLTF, PPARGC1B, FOXP1, HHEX, IFNAR2, DLX1, HIF1A, SP1, ZFP462, BPTF, HIPK2, IRF1, FOXC1, TBX19, NFIB	461	616	13588	1.96181
GOTERM_BP_FAT	GO:0044271~nitrogen compound biosynthetic process	25	3.68732	9.71812e-05	0.0343351	BCAT2, ADCY2, ADCY8, PAH, AGMAT, ATP12A, AGXT, MTHFD1, TPK1, HAAO, ALDH4A1, CEBPA, CHDH, BHMT2, SPHK2, PCBD1, AMPD3, PYCR1, CTH, ADCY9, RRM2, THNSL2, UROD, ADC, PRODH	461	302	13588	2.43999
GOTERM_BP_FAT	GO:0006350~transcription	89	13.1268	0.000113074	0.0342448	ENY2, HLF, E2F2, ZFP14, CNOT8, FOXK1, THRB, CBX4, CBX3, ZEB2, PAX4, ZFP788, CITED2, MLL5, TRP63, ATOH8, NR2F2, MYST1, ZFP239, NFX1, RREB1, RCOR1, ZFP467, MLXIPL, ESR1, TLE4, NCOA7, BANP, NR0B2, MCM2, HLTF, PCGF1, FOXN3, PPARGC1B, ZFP592, SLTM, EYA3, HHEX, HIF1A, NCOA3, GTF2I, NAB2, HIPK2, FOXC1, TBX19, XRN2, GLIS3, TSHZ2, GPBP1L1, NR3C2, TRIB3, NR3C1, ZFP619, SEC14L2, TCF7L2, ZFP617, TCERG1, LHX1…	461	1772	13588	1.48041
GOTERM_BP_FAT	GO:0048878~chemical homeostasis	28	4.12979	0.000121328	0.0321857	CYB5R4, FTL1, LDLR, SLC37A4, NR3C2, FOXO3, ATP12A, 1300017J02RIK, GCLM, TRF, ASGR2, INPP5K, MAFG, WDTC1, SCD2, ACO1, SMAD7, MLXIPL, STIM2, G6PC, NPC1, HIF1A, GNAQ, GCK, NAB2, ADRA1B, ADRA1A, GPR12	461	365	13588	2.2611
GOTERM_BP_FAT	GO:0045892~negative regulation of transcription, DNA-dependent	25	3.68732	0.000131671	0.0310664	GLIS3, FOXK1, THRB, CBX4, CBX3, PAX4, CITED2, PER2, TRP63, BCL6, BHLHE40, NR2F2, NFX1, CEBPA, WDTC1, TBX3, JARID2, MLXIPL, TLE4, SMAD3, FOXP1, HHEX, DLX1, BPTF, HIPK2	461	308	13588	2.39246
GOTERM_BP_FAT	GO:0051253~negative regulation of RNA metabolic process	25	3.68732	0.000145243	0.0308455	GLIS3, FOXK1, THRB, CBX4, CBX3, PAX4, CITED2, PER2, TRP63, BCL6, BHLHE40, NR2F2, NFX1, CEBPA, WDTC1, TBX3, JARID2, MLXIPL, TLE4, SMAD3, FOXP1, HHEX, DLX1, BPTF, HIPK2	461	310	13588	2.37702
GOTERM_BP_FAT	GO:0055114~oxidation reduction	42	6.19469	0.00018561	0.0357454	CYP2U1, ALDH8A1, CYB5R4, KDM6A, HTATIP2, PAH, GCLM, ALDH3A2, KDM1B, MTHFD1, FAR2, P4HA1, HAAO, ALDH4A1, AKR7A5, BDH1, SARDH, WWOX, HPD, CHDH, PTGR1, SCD2, CYP2D22, MAOA, FADS1, FADS3, CYP26A1, DHRS9, CYP4V3, CYP20A1, PHYH, FADS6, DHDH, GAPDHS, PYCR1, DHRS3, NNT, UOX, RRM2, HSD11B1, HPGD, PRODH	461	672	13588	1.84219
GOTERM_BP_FAT	GO:0046394~carboxylic acid biosynthetic process	15	2.21239	0.000303704	0.0531353	BHMT2, BCAT2, SCD2, FADS1, FADS3, PAH, FADS6, AGXT, MTHFD1, FAR2, PYCR1, CTH, ALDH4A1, THNSL2, PRODH	461	141	13588	3.13564
GOTERM_BP_FAT	GO:0016053~organic acid biosynthetic process	15	2.21239	0.000303704	0.0531353	BHMT2, BCAT2, SCD2, FADS1, FADS3, PAH, FADS6, AGXT, MTHFD1, FAR2, PYCR1, CTH, ALDH4A1, THNSL2, PRODH	461	141	13588	3.13564
GOTERM_BP_FAT	GO:0000122~negative regulation of transcription from RNA polymerase II promoter	20	2.94985	0.00033086	0.0534262	CEBPA, GLIS3, WDTC1, THRB, JARID2, MLXIPL, CBX4, SMAD3, TLE4, PAX4, FOXP1, HHEX, DLX1, BPTF, HIPK2, TRP63, PER2, BCL6, NR2F2, NFX1	461	231	13588	2.55195
GOTERM_BP_FAT	GO:0042592~homeostatic process	37	5.45723	0.000371457	0.055634	CYB5R4, GLRX5, FTL1, LDLR, SLC37A4, NR3C2, FOXO3, ATP12A, 1300017J02RIK, GCLM, TRF, RPA1, ASGR2, MLL5, INPP5K, DYRK3, BCL6, MAFG, CLNS1A, WDTC1, SCD2, SMAD7, ACO1, STIM2, MLXIPL, NPC1, G6PC, HIF1A, SP1, LARGE, GCK, GNAQ, NAB2, ADRA1B, GM12669, ADRA1A, GPR12	461	584	13588	1.86743
GOTERM_BP_FAT	GO:0009890~negative regulation of biosynthetic process	30	4.42478	0.000390621	0.0546332	GLIS3, FOXK1, THRB, CBX4, CBX3, ZEB2, PAX4, CITED2, TRP63, PER2, BCL6, BHLHE40, NR2F2, GCHFR, NFX1, CEBPA, WDTC1, TBX3, JARID2, MLXIPL, TLE4, SMAD3, ANKHD1, FOXP1, HHEX, DLX1, GCK, BPTF, NAB2, HIPK2	461	434	13588	2.03745
GOTERM_BP_FAT	GO:0016481~negative regulation of transcription	27	3.9823	0.000393666	0.0516973	GLIS3, FOXK1, THRB, CBX4, CBX3, PAX4, ZEB2, CITED2, TRP63, PER2, BCL6, BHLHE40, NR2F2, NFX1, CEBPA, WDTC1, TBX3, JARID2, MLXIPL, TLE4, SMAD3, FOXP1, HHEX, DLX1, BPTF, NAB2, HIPK2	461	372	13588	2.13932
GOTERM_BP_FAT	GO:0043467~regulation of generation of precursor metabolites and energy	5	0.737463	0.000726612	0.0881025	GAPDHS, CISD1, GCK, ADRA1B, MLXIPL	461	13	13588	11.3366
GOTERM_BP_FAT	GO:0031327~negative regulation of cellular biosynthetic process	29	4.27729	0.000734761	0.0843135	GLIS3, FOXK1, THRB, CBX4, CBX3, ZEB2, PAX4, CITED2, TRP63, PER2, BCL6, BHLHE40, NR2F2, NFX1, CEBPA, WDTC1, TBX3, JARID2, MLXIPL, TLE4, SMAD3, ANKHD1, FOXP1, HHEX, DLX1, GCK, BPTF, NAB2, HIPK2	461	430	13588	1.98785
GOTERM_BP_FAT	GO:0045449~regulation of transcription	102	15.0442	0.000922244	0.0994479	CNOT8, THRB, CBX4, CBX3, FOXO3, ZFP788, CITED2, MLL5, TRP63, ATOH8, MYST1, RREB1, PCBD1, RCOR1, MLXIPL, ZFP467, NR0B2, FOXN3, PPARGC1B, ZFP592, SLTM, HHEX, HIF1A, ZFP462, SMARCA2, XRN2, TSHZ2, GPBP1L1, ZFP619, ZFP617, TCERG1, LHX1, BHLHE40, SREBF1, MAFG, ZMYM2, KLF9, SMAD7, CREBBP, SMAD3, NR4A3, ZFP606, FOXP1, SUV39H2, DLX1, GCM1, DLX4, MZF1, ENY2, E2F2, HLF, ZFP14, HTATIP2, FOXK1, PAX4, ZEB2, NR…	461	2227	13588	1.35
GOTERM_BP_FAT	GO:0045893~positive regulation of transcription, DNA-dependent	28	4.12979	0.00095357	0.0977752	ENY2, GLIS3, HTATIP2, FOXK1, THRB, FOXO3, TCF7L2, ARID2, CITED2, MLL5, TRP63, SREBF1, CEBPA, TBX3, CREBBP, MLXIPL, SMAD3, NR4A3, VSX2, PPARGC1B, HIF1A, ZFP462, SP1, HIPK2, IRF1, FOXC1, TBX19, NFIB	461	416	13588	1.9839
GOTERM_BP_FAT	GO:0010906~regulation of glucose metabolic process	5	0.737463	0.000990212	0.0967531	GAPDHS, GCK, ADRA1B, MLXIPL, NR3C1	461	14	13588	10.5268
GOTERM_BP_FAT	GO:0010558~negative regulation of macromolecule biosynthetic process	28	4.12979	0.00101961	0.09518	GLIS3, FOXK1, THRB, CBX4, CBX3, PAX4, ZEB2, CITED2, TRP63, PER2, BCL6, BHLHE40, NR2F2, NFX1, CEBPA, WDTC1, TBX3, JARID2, MLXIPL, TLE4, SMAD3, ANKHD1, FOXP1, HHEX, DLX1, BPTF, NAB2, HIPK2	461	418	13588	1.97441
GOTERM_BP_FAT	GO:0045934~negative regulation of nucleobase, nucleoside, nucleotide and nucleic acid metabolic process	27	3.9823	0.00103578	0.0926152	GLIS3, FOXK1, THRB, CBX4, CBX3, PAX4, ZEB2, CITED2, TRP63, PER2, BCL6, BHLHE40, NR2F2, NFX1, CEBPA, WDTC1, TBX3, JARID2, MLXIPL, TLE4, SMAD3, FOXP1, HHEX, DLX1, BPTF, NAB2, HIPK2	461	397	13588	2.0046
GOTERM_BP_FAT	GO:0051254~positive regulation of RNA metabolic process	28	4.12979	0.00105915	0.0908464	ENY2, GLIS3, HTATIP2, FOXK1, THRB, FOXO3, TCF7L2, ARID2, CITED2, MLL5, TRP63, SREBF1, CEBPA, TBX3, CREBBP, MLXIPL, SMAD3, NR4A3, VSX2, PPARGC1B, HIF1A, ZFP462, SP1, HIPK2, IRF1, FOXC1, TBX19, NFIB	461	419	13588	1.96969
GOTERM_BP_FAT	GO:0051172~negative regulation of nitrogen compound metabolic process	27	3.9823	0.00119679	0.0981625	GLIS3, FOXK1, THRB, CBX4, CBX3, PAX4, ZEB2, CITED2, TRP63, PER2, BCL6, BHLHE40, NR2F2, NFX1, CEBPA, WDTC1, TBX3, JARID2, MLXIPL, TLE4, SMAD3, FOXP1, HHEX, DLX1, BPTF, NAB2, HIPK2	461	401	13588	1.9846
GOTERM_BP_FAT	GO:0010628~positive regulation of gene expression	31	4.57227	0.00120891	0.0954825	ENY2, GLIS3, HTATIP2, FOXK1, THRB, FOXO3, TCF7L2, ARID2, CITED2, MLL5, TRP63, SREBF1, CEBPA, TBX3, PCBD1, CREBBP, MLXIPL, ESR1, SMAD3, NR4A3, VSX2, PPARGC1B, HIF1A, SP1, ZFP462, IRF6, HIPK2, IRF1, FOXC1, TBX19, NFIB	461	488	13588	1.87239
GOTERM_BP_FAT	GO:0010675~regulation of cellular carbohydrate metabolic process	5	0.737463	0.00131443	0.0997455	GAPDHS, GCK, ADRA1B, MLXIPL, NR3C1	461	15	13588	9.82502
GOTERM_BP_FAT	GO:0006109~regulation of carbohydrate metabolic process	5	0.737463	0.00131443	0.0997455	GAPDHS, GCK, ADRA1B, MLXIPL, NR3C1	461	15	13588	9.82502
GOTERM_BP_FAT	GO:0045941~positive regulation of transcription	30	4.42478	0.00161561	0.117115	ENY2, GLIS3, HTATIP2, FOXK1, THRB, FOXO3, TCF7L2, ARID2, CITED2, MLL5, TRP63, SREBF1, CEBPA, TBX3, PCBD1, CREBBP, MLXIPL, SMAD3, NR4A3, VSX2, PPARGC1B, HIF1A, SP1, ZFP462, IRF6, HIPK2, IRF1, FOXC1, TBX19, NFIB	461	475	13588	1.86158
GOTERM_BP_FAT	GO:0010629~negative regulation of gene expression	27	3.9823	0.00163881	0.114846	GLIS3, FOXK1, THRB, CBX4, CBX3, PAX4, ZEB2, CITED2, TRP63, PER2, BCL6, BHLHE40, NR2F2, NFX1, CEBPA, WDTC1, TBX3, JARID2, MLXIPL, TLE4, SMAD3, FOXP1, HHEX, DLX1, BPTF, NAB2, HIPK2	461	410	13588	1.94104
GOTERM_BP_FAT	GO:0006355~regulation of transcription, DNA-dependent	71	10.472	0.00180844	0.122031	ENY2, HLF, E2F2, ZFP14, HTATIP2, FOXK1, THRB, CBX4, CBX3, ZEB2, PAX4, FOXO3, ZFP788, CITED2, MLL5, TRP63, NR2F2, NFX1, MLXIPL, ESR1, TLE4, NR0B2, HLTF, FOXN3, PPARGC1B, IFNAR2, HHEX, HIF1A, NCOA3, ZFP462, BPTF, HIPK2, FOXC1, TBX19, GLIS3, ZFP395, TSHZ2, NR3C2, NR3C1, ZFP619, ARID2, TCF7L2, ZFP617, LHX1, PER2, BCL6, BHLHE40, SREBF1, MAFG, CEBPA, WDTC1, TBX3, JARID2, SMAD7, CREBBP, SMAD3, NR4A3, ZF…	461	1465	13588	1.42848
GOTERM_BP_FAT	GO:0035239~tube morphogenesis	15	2.21239	0.00203595	0.132211	TBX3, BTRC, ESR1, SMAD3, FZD3, ZEB2, NR3C1, NR4A3, CXCL12, LGR4, HHEX, HIF1A, NCOA3, TRP63, IPMK	461	171	13588	2.58553
GOTERM_BP_FAT	GO:0010557~positive regulation of macromolecule biosynthetic process	32	4.71976	0.00223455	0.139973	ENY2, GLIS3, HTATIP2, FOXK1, THRB, TLR1, FOXO3, TCF7L2, ARID2, CITED2, MLL5, TRP63, SREBF1, CEBPA, TBX3, PCBD1, CREBBP, MLXIPL, SMAD3, NR4A3, VSX2, PPARGC1B, HIF1A, SP1, GCK, ZFP462, IRF6, HIPK2, IRF1, FOXC1, TBX19, NFIB	461	530	13588	1.77963
GOTERM_BP_FAT	GO:0045935~positive regulation of nucleobase, nucleoside, nucleotide and nucleic acid metabolic process	31	4.57227	0.00238218	0.14435	ENY2, GLIS3, HTATIP2, FOXK1, THRB, FOXO3, TCF7L2, ARID2, CITED2, MLL5, TRP63, SREBF1, CEBPA, TBX3, PCBD1, CREBBP, MLXIPL, SMAD3, NR4A3, VSX2, PPARGC1B, EYA3, HIF1A, SP1, ZFP462, IRF6, HIPK2, IRF1, FOXC1, TBX19, NFIB	461	510	13588	1.79162
GOTERM_BP_FAT	GO:0009891~positive regulation of biosynthetic process	33	4.86726	0.0024957	0.146601	ENY2, GLIS3, HTATIP2, FOXK1, THRB, TLR1, FOXO3, SEC14L2, TCF7L2, ARID2, CITED2, MLL5, TRP63, SREBF1, CEBPA, TBX3, PCBD1, CREBBP, MLXIPL, SMAD3, NR4A3, VSX2, PPARGC1B, HIF1A, SP1, GCK, ZFP462, IRF6, HIPK2, IRF1, FOXC1, TBX19, NFIB	461	557	13588	1.74628
GOTERM_BP_FAT	GO:0045944~positive regulation of transcription from RNA polymerase II promoter	24	3.53982	0.00253226	0.144661	SREBF1, CEBPA, GLIS3, HTATIP2, THRB, CREBBP, MLXIPL, SMAD3, FOXO3, NR4A3, VSX2, ARID2, TCF7L2, PPARGC1B, CITED2, HIF1A, SP1, ZFP462, HIPK2, TRP63, IRF1, FOXC1, TBX19, NFIB	461	358	13588	1.97598
GOTERM_BP_FAT	GO:0051252~regulation of RNA metabolic process	71	10.472	0.00264311	0.146642	ENY2, HLF, E2F2, ZFP14, HTATIP2, FOXK1, THRB, CBX4, CBX3, ZEB2, PAX4, FOXO3, ZFP788, CITED2, MLL5, TRP63, NR2F2, NFX1, MLXIPL, ESR1, TLE4, NR0B2, HLTF, FOXN3, PPARGC1B, IFNAR2, HHEX, HIF1A, NCOA3, ZFP462, BPTF, HIPK2, FOXC1, TBX19, GLIS3, ZFP395, TSHZ2, NR3C2, NR3C1, ZFP619, ARID2, TCF7L2, ZFP617, LHX1, PER2, BCL6, BHLHE40, SREBF1, MAFG, CEBPA, WDTC1, TBX3, JARID2, SMAD7, CREBBP, SMAD3, NR4A3, ZF…	461	1488	13588	1.4064
GOTERM_BP_FAT	GO:0010907~positive regulation of glucose metabolic process	4	0.589971	0.00277997	0.149806	GAPDHS, GCK, ADRA1B, MLXIPL	461	9	13588	13.1
GOTERM_BP_FAT	GO:0016568~chromatin modification	18	2.65487	0.00282448	0.148328	ENY2, KDM6A, RCOR1, CREBBP, CBX4, CBX3, BANP, NR3C1, HLTF, SUV39H2, EYA3, KDM1B, PHF17, MLL5, BPTF, HJURP, CHD1, MYST1	461	236	13588	2.2481
GOTERM_BP_FAT	GO:0010604~positive regulation of macromolecule metabolic process	36	5.30973	0.0029841	0.152352	ENY2, GLIS3, HTATIP2, FOXK1, THRB, TLR1, FOXO3, TCF7L2, ARID2, CITED2, MLL5, TRP63, SREBF1, CEBPA, TBX3, PCBD1, CREBBP, ESR1, MLXIPL, SMAD3, NR4A3, VSX2, PPARGC1B, GAPDHS, EYA3, HIF1A, SP1, GCK, ZFP462, IRF6, HIPK2, ADRA1B, IRF1, FOXC1, TBX19, NFIB	461	633	13588	1.67631
GOTERM_BP_FAT	GO:0045786~negative regulation of cell cycle	7	1.03245	0.00306829	0.152709	MAD2L1, CDKN1B, FOXK1, ESR1, FOXC1, APBB2, HPGD	461	43	13588	4.79826
GOTERM_BP_FAT	GO:0043066~negative regulation of apoptosis	18	2.65487	0.00321757	0.155954	TBX3, SPHK2, ERBB3, TMBIM6, ESR1, PIM1, GCLM, PTEN, CITED2, DAPK1, PROC, DLX1, CDKN1B, HIPK2, TRP63, BCL6, FOXC1, APBB2	461	239	13588	2.21988
GOTERM_BP_FAT	GO:0051186~cofactor metabolic process	15	2.21239	0.00360499	0.169292	COASY, CYB5R4, TALDO1, ACO1, VKORC1L1, GSTT1, GSTT2, ACSS2, GCLM, MTHFD1, TPK1, PANK2, GCK, HAAO, UROD	461	182	13588	2.42926
GOTERM_BP_FAT	GO:0051173~positive regulation of nitrogen compound metabolic process	31	4.57227	0.00376044	0.172205	ENY2, GLIS3, HTATIP2, FOXK1, THRB, FOXO3, TCF7L2, ARID2, CITED2, MLL5, TRP63, SREBF1, CEBPA, TBX3, PCBD1, CREBBP, MLXIPL, SMAD3, NR4A3, VSX2, PPARGC1B, EYA3, HIF1A, SP1, ZFP462, IRF6, HIPK2, IRF1, FOXC1, TBX19, NFIB	461	526	13588	1.73712
GOTERM_BP_FAT	GO:0010676~positive regulation of cellular carbohydrate metabolic process	4	0.589971	0.00387221	0.173202	GAPDHS, GCK, ADRA1B, MLXIPL	461	10	13588	11.79
GOTERM_BP_FAT	GO:0045913~positive regulation of carbohydrate metabolic process	4	0.589971	0.00387221	0.173202	GAPDHS, GCK, ADRA1B, MLXIPL	461	10	13588	11.79
GOTERM_BP_FAT	GO:0043069~negative regulation of programmed cell death	18	2.65487	0.00397106	0.17364	TBX3, SPHK2, ERBB3, TMBIM6, ESR1, PIM1, GCLM, PTEN, CITED2, DAPK1, PROC, DLX1, CDKN1B, HIPK2, TRP63, BCL6, FOXC1, APBB2	461	244	13588	2.17439
GOTERM_BP_FAT	GO:0031328~positive regulation of cellular biosynthetic process	32	4.71976	0.00400863	0.171673	ENY2, GLIS3, HTATIP2, FOXK1, THRB, TLR1, FOXO3, TCF7L2, ARID2, CITED2, MLL5, TRP63, SREBF1, CEBPA, TBX3, PCBD1, CREBBP, MLXIPL, SMAD3, NR4A3, VSX2, PPARGC1B, HIF1A, SP1, GCK, ZFP462, IRF6, HIPK2, IRF1, FOXC1, TBX19, NFIB	461	552	13588	1.7087
GOTERM_BP_FAT	GO:0010605~negative regulation of macromolecule metabolic process	30	4.42478	0.00401239	0.168491	GLIS3, FOXK1, THRB, CBX4, CBX3, ZEB2, PAX4, CITED2, INPP5K, TRP63, PER2, BCL6, BHLHE40, NR2F2, NFX1, CEBPA, WDTC1, TBX3, JARID2, MLXIPL, TLE4, SMAD3, ANKHD1, FOXP1, HHEX, DLX1, BPTF, NAB2, HIPK2, ADRA1B	461	506	13588	1.74753
GOTERM_BP_FAT	GO:0060548~negative regulation of cell death	18	2.65487	0.00411742	0.169235	TBX3, SPHK2, ERBB3, TMBIM6, ESR1, PIM1, GCLM, PTEN, CITED2, DAPK1, PROC, DLX1, CDKN1B, HIPK2, TRP63, BCL6, FOXC1, APBB2	461	245	13588	2.16551
GOTERM_BP_FAT	GO:0006325~chromatin organization	21	3.09735	0.00535943	0.21066	ENY2, KDM6A, RCOR1, CREBBP, CBX4, CBX3, BANP, NR3C1, MCM2, HLTF, SUV39H2, EYA3, KDM1B, PHF17, MLL5, BPTF, HJURP, CHD1, CHD6, SMARCA2, MYST1	461	315	13588	1.965
GOTERM_BP_FAT	GO:0046890~regulation of lipid biosynthetic process	5	0.737463	0.0058398	0.223274	SREBF1, WDTC1, MLXIPL, NR3C1, SEC14L2	461	22	13588	6.69888
GOTERM_BP_FAT	GO:0009310~amine catabolic process	8	1.17994	0.00623176	0.232327	MTHFD1, BCAT2, MAOA, PAH, SARDH, AFMID, HPD, PRODH	461	65	13588	3.6277
GOTERM_BP_FAT	GO:0019725~cellular homeostasis	22	3.24484	0.0065797	0.239541	MAFG, CLNS1A, GLRX5, WDTC1, SCD2, FTL1, ACO1, SMAD7, SLC37A4, NR3C2, STIM2, GCLM, 1300017J02RIK, TRF, HIF1A, GNAQ, GCK, LARGE, NAB2, GM12669, ADRA1A, GPR12	461	343	13588	1.89053
GOTERM_BP_FAT	GO:0010565~regulation of cellular ketone metabolic process	5	0.737463	0.00688331	0.245052	SREBF1, WDTC1, GCK, MLXIPL, NR3C1	461	23	13588	6.40762
GOTERM_BP_FAT	GO:0048732~gland development	15	2.21239	0.00720708	0.250932	BCAT2, TBX3, BTRC, ESR1, SMAD3, NR3C1, PTEN, CITED2, HHEX, ARHGAP5, NCOA3, IRF6, TRP63, FOXC1, TBX19	461	197	13588	2.24429
GOTERM_BP_FAT	GO:0010551~regulation of specific transcription from RNA polymerase II promoter	7	1.03245	0.0072263	0.247558	CEBPA, HHEX, DLX1, WDTC1, PER2, MLXIPL, CITED2	461	51	13588	4.0456
GOTERM_BP_FAT	GO:0001568~blood vessel development	17	2.50737	0.00898922	0.293768	HTATIP2, TBX3, SPHK2, SMAD7, ARHGAP24, GJA5, CXCL12, PTEN, CITED2, HIF1A, ITGA7, ADRA1B, FOXC1, NR2F2, PPAP2B, FIGF, RAPGEF1	461	244	13588	2.05359
GOTERM_BP_FAT	GO:0042127~regulation of cell proliferation	30	4.42478	0.0091745	0.294455	PTEN, RPA1, FANCL, ARHGAP5, LHX1, TRP63, ZAP70, BCL6, FIGF, CEBPA, MAFG, SPHK2, TBX3, JARID2, ESR1, LIFR, SMAD3, FGF21, VSX2, FOXP1, TNS3, HHEX, CDKN1B, IRF6, DBP, HIPK2, SP6, SMARCA2, TBX19, NFIB	461	538	13588	1.64359
GOTERM_BP_FAT	GO:0006732~coenzyme metabolic process	12	1.76991	0.0093349	0.29446	TPK1, MTHFD1, COASY, PANK2, TALDO1, GCK, ACO1, HAAO, GSTT1, GSTT2, ACSS2, GCLM	461	143	13588	2.47343
GOTERM_BP_FAT	GO:0009063~cellular amino acid catabolic process	7	1.03245	0.00952231	0.295169	MTHFD1, BCAT2, PAH, SARDH, AFMID, HPD, PRODH	461	54	13588	3.82084
GOTERM_BP_FAT	GO:0055082~cellular chemical homeostasis	18	2.65487	0.00990911	0.300933	MAFG, WDTC1, SCD2, FTL1, ACO1, SMAD7, SLC37A4, NR3C2, STIM2, GCLM, 1300017J02RIK, TRF, HIF1A, GNAQ, GCK, NAB2, ADRA1A, GPR12	461	268	13588	1.97967
GOTERM_BP_FAT	GO:0043470~regulation of carbohydrate catabolic process	3	0.442478	0.0106847	0.316036	GAPDHS, ADRA1B, MLXIPL	461	5	13588	17.685
GOTERM_BP_FAT	GO:0035024~negative regulation of Rho protein signal transduction	3	0.442478	0.0106847	0.316036	ADRA1B, ADRA1A, BCL6	461	5	13588	17.685
GOTERM_BP_FAT	GO:0043471~regulation of cellular carbohydrate catabolic process	3	0.442478	0.0106847	0.316036	GAPDHS, ADRA1B, MLXIPL	461	5	13588	17.685
GOTERM_BP_FAT	GO:0060603~mammary gland duct morphogenesis	5	0.737463	0.0107304	0.312938	TBX3, NCOA3, BTRC, ESR1, NR3C1	461	26	13588	5.66828
GOTERM_BP_FAT	GO:0008361~regulation of cell size	10	1.47493	0.0109757	0.314677	WDTC1, ARHGAP5, FOXK1, BBC3, ADRA1B, TRP63, ESR1, ADRA1A, APBB2, XRN2	461	108	13588	2.72917
GOTERM_BP_FAT	GO:0001944~vasculature development	17	2.50737	0.0111794	0.315389	HTATIP2, TBX3, SPHK2, SMAD7, ARHGAP24, GJA5, CXCL12, PTEN, CITED2, HIF1A, ITGA7, ADRA1B, FOXC1, NR2F2, PPAP2B, FIGF, RAPGEF1	461	250	13588	2.0043
GOTERM_BP_FAT	GO:0010817~regulation of hormone levels	11	1.62242	0.0116298	0.321717	ALDH8A1, CYB5R4, ECE1, TBX3, SERPINA6, ESR1, DHRS9, CYP26A1, RELN, RAPGEF4, NR3C1	461	128	13588	2.53301
GOTERM_BP_FAT	GO:0001889~liver development	6	0.884956	0.0145295	0.380186	CEBPA, HHEX, SP1, JARID2, SMAD3, CITED2	461	43	13588	4.1128
GOTERM_BP_FAT	GO:0006879~cellular iron ion homeostasis	5	0.737463	0.0157454	0.40007	FTL1, HIF1A, ACO1, 1300017J02RIK, TRF	461	29	13588	5.08191
GOTERM_BP_FAT	GO:0008284~positive regulation of cell proliferation	18	2.65487	0.0167238	0.414316	TBX3, SPHK2, ESR1, LIFR, FGF21, VSX2, FOXP1, RPA1, TNS3, CDKN1B, ARHGAP5, LHX1, HIPK2, TRP63, ZAP70, SP6, BCL6, FIGF	461	284	13588	1.86814
GOTERM_BP_FAT	GO:0046058~cAMP metabolic process	4	0.589971	0.0184057	0.440515	ADCY2, ADCY9, ADCY8, PDE4D	461	17	13588	6.93531
GOTERM_BP_FAT	GO:0051276~chromosome organization	23	3.39233	0.0195075	0.455044	ENY2, KDM6A, RCOR1, CREBBP, CBX4, CBX3, BANP, NR3C1, MCM2, HLTF, SUV39H2, EYA3, RPA1, KDM1B, PHF17, MLL5, MAD2L1, BPTF, HJURP, CHD1, CHD6, SMARCA2, MYST1	461	404	13588	1.67804
GOTERM_BP_FAT	GO:0046395~carboxylic acid catabolic process	8	1.17994	0.0196892	0.453451	MTHFD1, BCAT2, PAH, SARDH, PHYH, AFMID, HPD, PRODH	461	81	13588	2.91112
GOTERM_BP_FAT	GO:0016054~organic acid catabolic process	8	1.17994	0.0196892	0.453451	MTHFD1, BCAT2, PAH, SARDH, PHYH, AFMID, HPD, PRODH	461	81	13588	2.91112
GOTERM_BP_FAT	GO:0009108~coenzyme biosynthetic process	7	1.03245	0.0208787	0.468532	TPK1, MTHFD1, COASY, PANK2, HAAO, ACSS2, GCLM	461	64	13588	3.22383
GOTERM_BP_FAT	GO:0032535~regulation of cellular component size	12	1.76991	0.0210662	0.466935	FMN1, WDTC1, ARHGAP5, FOXK1, BBC3, ADRA1B, TRP63, ESR1, ADRA1A, APBB2, KANK1, XRN2	461	161	13588	2.1969
GOTERM_BP_FAT	GO:0006575~cellular amino acid derivative metabolic process	11	1.62242	0.0215726	0.470433	CHDH, CYP2D22, P4HA1, MAOA, GSTT1, GAMT, GSTT2, AGMAT, GCLM, ADC, AFMID	461	141	13588	2.29947
GOTERM_BP_FAT	GO:0030522~intracellular receptor-mediated signaling pathway	5	0.737463	0.0220256	0.47299	MLL5, KLF9, CYP26A1, NR3C1, PPARGC1B	461	32	13588	4.60548
GOTERM_BP_FAT	GO:0042981~regulation of apoptosis	29	4.27729	0.0221001	0.469677	HTATIP2, ERBB3, NR3C1, FOXO3, PTEN, GCLM, CITED2, TRP63, BCL6, BMF, WWOX, SPHK2, TBX3, TMBIM6, ESR1, PIM1, BIRC2, PROC, DAPK1, DLX1, EPHA7, CDKN1B, CAPN10, HIF1A, BBC3, HIPK2, FOXC1, FAF1, APBB2	461	553	13588	1.54571
GOTERM_BP_FAT	GO:0006644~phospholipid metabolic process	12	1.76991	0.0228418	0.476537	SAMD8, SGMS2, SPHK2, PLCG1, PIK3C2B, ASPG, GPLD1, LCLAT1, PPAP2B, PTEN, IPMK, LPCAT3	461	163	13588	2.16994
GOTERM_BP_FAT	GO:0044042~glucan metabolic process	5	0.737463	0.0244129	0.495147	G6PC, GBE1, PYGL, SLC37A4, PPP1CB	461	33	13588	4.46592
GOTERM_BP_FAT	GO:0006073~cellular glucan metabolic process	5	0.737463	0.0244129	0.495147	G6PC, GBE1, PYGL, SLC37A4, PPP1CB	461	33	13588	4.46592
GOTERM_BP_FAT	GO:0060443~mammary gland morphogenesis	5	0.737463	0.0244129	0.495147	TBX3, NCOA3, BTRC, ESR1, NR3C1	461	33	13588	4.46592
GOTERM_BP_FAT	GO:0005977~glycogen metabolic process	5	0.737463	0.0244129	0.495147	G6PC, GBE1, PYGL, SLC37A4, PPP1CB	461	33	13588	4.46592
GOTERM_BP_FAT	GO:0060444~branching involved in mammary gland duct morphogenesis	4	0.589971	0.0249538	0.498413	TBX3, NCOA3, BTRC, ESR1	461	19	13588	6.20527
GOTERM_BP_FAT	GO:0043067~regulation of programmed cell death	29	4.27729	0.0254981	0.501628	HTATIP2, ERBB3, NR3C1, FOXO3, PTEN, GCLM, CITED2, TRP63, BCL6, BMF, WWOX, SPHK2, TBX3, TMBIM6, ESR1, PIM1, BIRC2, PROC, DAPK1, DLX1, EPHA7, CDKN1B, CAPN10, HIF1A, BBC3, HIPK2, FOXC1, FAF1, APBB2	461	560	13588	1.52639
GOTERM_BP_FAT	GO:0032583~regulation of gene-specific transcription	7	1.03245	0.0255583	0.498151	CEBPA, HHEX, DLX1, WDTC1, PER2, MLXIPL, CITED2	461	67	13588	3.07948
GOTERM_BP_FAT	GO:0007049~cell cycle	31	4.57227	0.0263141	0.504139	E2F2, PKMYT1, ANLN, RPA1, MLL5, RAD21, HJURP, MDC1, TRP63, STAG1, CRYAA, RAN, PAPD7, PIM1, BANP, MCM2, PLK1S1, TACC3, PPP1CB, FOXN3, WEE1, SUV39H2, RASSF4, DCLRE1A, CDKN1B, MAD2L1, CKS2, MAPRE2, G0S2, APBB2, 4933411G11RIK	461	611	13588	1.49546
GOTERM_BP_FAT	GO:0030879~mammary gland development	8	1.17994	0.0263943	0.501	BCAT2, ARHGAP5, TBX3, NCOA3, IRF6, BTRC, ESR1, NR3C1	461	86	13588	2.74187
GOTERM_BP_FAT	GO:0055088~lipid homeostasis	5	0.737463	0.0269506	0.504183	ASGR2, NPC1, G6PC, LDLR, SLC37A4	461	34	13588	4.33457
GOTERM_BP_FAT	GO:0006775~fat-soluble vitamin metabolic process	5	0.737463	0.0269506	0.504183	ALDH8A1, VKORC1L1, TTPA, DHRS9, CYP26A1	461	34	13588	4.33457
GOTERM_BP_FAT	GO:0010941~regulation of cell death	29	4.27729	0.0270943	0.501945	HTATIP2, ERBB3, NR3C1, FOXO3, PTEN, GCLM, CITED2, TRP63, BCL6, BMF, WWOX, SPHK2, TBX3, TMBIM6, ESR1, PIM1, BIRC2, PROC, DAPK1, DLX1, EPHA7, CDKN1B, CAPN10, HIF1A, BBC3, HIPK2, FOXC1, FAF1, APBB2	461	563	13588	1.51825
GOTERM_BP_FAT	GO:0046889~positive regulation of lipid biosynthetic process	3	0.442478	0.0279669	0.509065	SREBF1, MLXIPL, SEC14L2	461	8	13588	11.0531
GOTERM_BP_FAT	GO:0006560~proline metabolic process	3	0.442478	0.0279669	0.509065	PYCR1, ALDH4A1, PRODH	461	8	13588	11.0531
GOTERM_BP_FAT	GO:0018130~heterocycle biosynthetic process	6	0.884956	0.0285045	0.511777	TPK1, MTHFD1, PYCR1, PCBD1, ALDH4A1, UROD	461	51	13588	3.46765
GOTERM_BP_FAT	GO:0006766~vitamin metabolic process	7	1.03245	0.0290377	0.514362	TPK1, ALDH8A1, VKORC1L1, TTPA, HAAO, DHRS9, CYP26A1	461	69	13588	2.99022
GOTERM_BP_FAT	GO:0055072~iron ion homeostasis	5	0.737463	0.0296402	0.517715	FTL1, HIF1A, ACO1, 1300017J02RIK, TRF	461	35	13588	4.21072
GOTERM_BP_FAT	GO:0051726~regulation of cell cycle	14	2.0649	0.0304357	0.523255	E2F2, FOXK1, TBX3, BTRC, ESR1, TACC3, PTEN, CITED2, CDKN1B, MAD2L1, FOXC1, APBB2, HPGD, 4933411G11RIK	461	214	13588	1.92827
GOTERM_BP_FAT	GO:0034754~cellular hormone metabolic process	6	0.884956	0.0306921	0.522362	ALDH8A1, SERPINA6, ESR1, DHRS9, CYP26A1, NR3C1	461	52	13588	3.40097
GOTERM_BP_FAT	GO:0006333~chromatin assembly or disassembly	9	1.32743	0.0315889	0.528847	HJURP, CBX4, CBX3, CHD1, MCM2, CHD6, SMARCA2, MYST1, SUV39H2	461	109	13588	2.43372
GOTERM_BP_FAT	GO:0006873~cellular ion homeostasis	16	2.35988	0.0324048	0.534214	MAFG, SCD2, FTL1, ACO1, SMAD7, SLC37A4, STIM2, NR3C2, GCLM, 1300017J02RIK, TRF, HIF1A, GNAQ, NAB2, ADRA1A, GPR12	461	261	13588	1.8069
GOTERM_BP_FAT	GO:0042445~hormone metabolic process	8	1.17994	0.0327686	0.534447	ALDH8A1, ECE1, SERPINA6, ESR1, DHRS9, CYP26A1, RELN, NR3C1	461	90	13588	2.62
GOTERM_BP_FAT	GO:0030003~cellular cation homeostasis	11	1.62242	0.0339198	0.543206	MAFG, FTL1, HIF1A, ACO1, SLC37A4, NR3C2, STIM2, ADRA1A, 1300017J02RIK, GPR12, TRF	461	152	13588	2.13306
GOTERM_BP_FAT	GO:0051188~cofactor biosynthetic process	8	1.17994	0.0345093	0.545736	TPK1, MTHFD1, COASY, PANK2, HAAO, UROD, ACSS2, GCLM	461	91	13588	2.59121
GOTERM_BP_FAT	GO:0060562~epithelial tube morphogenesis	9	1.32743	0.0346652	0.543667	HHEX, TBX3, NCOA3, BTRC, ESR1, ZEB2, FZD3, NR3C1, IPMK	461	111	13588	2.38987
GOTERM_BP_FAT	GO:0042304~regulation of fatty acid biosynthetic process	3	0.442478	0.0351631	0.545193	SREBF1, WDTC1, MLXIPL	461	9	13588	9.82502
GOTERM_BP_FAT	GO:0006112~energy reserve metabolic process	5	0.737463	0.0354799	0.544828	G6PC, GBE1, PYGL, SLC37A4, PPP1CB	461	37	13588	3.98312
GOTERM_BP_FAT	GO:0009069~serine family amino acid metabolic process	4	0.589971	0.0368165	0.55475	CTH, GCLM, SARDH, AGXT	461	22	13588	5.3591
GOTERM_BP_FAT	GO:0009066~aspartate family amino acid metabolic process	4	0.589971	0.0368165	0.55475	MTHFD1, BHMT2, ASPG, THNSL2	461	22	13588	5.3591
GOTERM_BP_FAT	GO:0019637~organophosphate metabolic process	12	1.76991	0.0371371	0.554348	SAMD8, SGMS2, SPHK2, PLCG1, PIK3C2B, ASPG, GPLD1, LCLAT1, PPAP2B, PTEN, IPMK, LPCAT3	461	176	13588	2.00966
GOTERM_BP_FAT	GO:0006790~sulfur metabolic process	8	1.17994	0.0400961	0.579109	TPK1, MTHFD1, CTH, BHMT2, GSTT1, GSTT2, GCLM, PAPSS2	461	94	13588	2.50852
GOTERM_BP_FAT	GO:0007507~heart development	14	2.0649	0.0402445	0.57693	TBX3, ERBB3, SMAD7, SMAD3, GJA5, PTEN, FOXP1, CITED2, HHEX, HIF1A, GNAQ, ADRA1B, ADRA1A, FOXC1	461	223	13588	1.85045
GOTERM_BP_FAT	GO:0050801~ion homeostasis	17	2.50737	0.0411762	0.581923	MAFG, SCD2, FTL1, ACO1, SMAD7, SLC37A4, NR3C2, STIM2, ATP12A, GCLM, 1300017J02RIK, TRF, HIF1A, GNAQ, NAB2, ADRA1A, GPR12	461	293	13588	1.71016
GOTERM_BP_FAT	GO:0031329~regulation of cellular catabolic process	4	0.589971	0.0413065	0.579612	GAPDHS, NPC1, ADRA1B, MLXIPL	461	23	13588	5.1261
GOTERM_BP_FAT	GO:0048806~genitalia development	4	0.589971	0.0413065	0.579612	TBX3, TRP63, TCF7L2, LGR4	461	23	13588	5.1261
GOTERM_BP_FAT	GO:0000096~sulfur amino acid metabolic process	4	0.589971	0.0413065	0.579612	MTHFD1, CTH, BHMT2, GCLM	461	23	13588	5.1261
GOTERM_BP_FAT	GO:0008283~cell proliferation	15	2.21239	0.0417681	0.580294	SPHK2, BTRC, CREBBP, ESR1, PIM1, ZEB2, TACC3, CXCL12, LGR4, HHEX, IFNAR2, IRF6, TRP63, FOXC1, FIGF	461	247	13588	1.78998
GOTERM_BP_FAT	GO:0019216~regulation of lipid metabolic process	6	0.884956	0.0460047	0.613032	SREBF1, WDTC1, THRB, MLXIPL, NR3C1, SEC14L2	461	58	13588	3.04914
GOTERM_BP_FAT	GO:0006006~glucose metabolic process	10	1.47493	0.0484171	0.628866	GAPDHS, WDTC1, G6PC, TALDO1, GBE1, GCK, PYGL, SLC37A4, ALDOB, PPP1CB	461	140	13588	2.10536
GOTERM_BP_FAT	GO:0055080~cation homeostasis	12	1.76991	0.0485413	0.626441	MAFG, FTL1, HIF1A, ACO1, SLC37A4, NR3C2, STIM2, ADRA1A, ATP12A, 1300017J02RIK, GPR12, TRF	461	184	13588	1.92229
GOTERM_BP_FAT	GO:0044272~sulfur compound biosynthetic process	5	0.737463	0.0490159	0.626752	TPK1, MTHFD1, CTH, BHMT2, GCLM	461	41	13588	3.59452
GOTERM_BP_FAT	GO:0016311~dephosphorylation	10	1.47493	0.0502474	0.632788	EYA3, PTPRK, G6PC, PTPRF, PPM1K, CDC14B, MTMR10, PTEN, PPP1CB, MTMR4	461	141	13588	2.09043
GOTERM_BP_FAT	GO:0006144~purine base metabolic process	3	0.442478	0.0513846	0.637939	1190003J15RIK, UOX, AMPD3	461	11	13588	8.03865
GOTERM_BP_FAT	GO:0009074~aromatic amino acid family catabolic process	3	0.442478	0.0513846	0.637939	PAH, AFMID, HPD	461	11	13588	8.03865
GOTERM_BP_FAT	GO:0006268~DNA unwinding during replication	3	0.442478	0.0513846	0.637939	TOP1, MCM2, TOP3B	461	11	13588	8.03865
GOTERM_BP_FAT	GO:0043523~regulation of neuron apoptosis	7	1.03245	0.0536715	0.65112	DLX1, EPHA7, ERBB3, HIPK2, ESR1, NR3C1, GCLM	461	80	13588	2.57907
GOTERM_BP_FAT	GO:0001892~embryonic placenta development	6	0.884956	0.0550959	0.657777	CEBPA, HIF1A, GCM1, SP1, TTPA, CITED2	461	61	13588	2.89919
GOTERM_BP_FAT	GO:0042632~cholesterol homeostasis	4	0.589971	0.056329	0.662929	NPC1, G6PC, LDLR, SLC37A4	461	26	13588	4.53462
GOTERM_BP_FAT	GO:0055092~sterol homeostasis	4	0.589971	0.056329	0.662929	NPC1, G6PC, LDLR, SLC37A4	461	26	13588	4.53462
GOTERM_BP_FAT	GO:0044264~cellular polysaccharide metabolic process	5	0.737463	0.0567101	0.6623	G6PC, GBE1, PYGL, SLC37A4, PPP1CB	461	43	13588	3.42733
GOTERM_BP_FAT	GO:0009064~glutamine family amino acid metabolic process	5	0.737463	0.0567101	0.6623	GLS2, PYCR1, ALDH4A1, GCLM, PRODH	461	43	13588	3.42733
GOTERM_BP_FAT	GO:0030900~forebrain development	11	1.62242	0.0577059	0.665724	HHEX, DLX1, TBX3, GNAQ, LHX1, RELN, ZEB2, NR2F2, TACC3, TBX19, NFIB	461	167	13588	1.94147
GOTERM_BP_FAT	GO:0007389~pattern specification process	16	2.35988	0.0596204	0.674919	TBX3, FTO, SMAD3, CYP26A1, ZEB2, CXCL12, CITED2, HHEX, DLX1, LHX1, HIPK2, TRP63, FOXC1, RELN, NR2F2, PCSK6	461	284	13588	1.66057
GOTERM_BP_FAT	GO:0048870~cell motility	16	2.35988	0.0596204	0.674919	ELANE, SLC37A4, ASTN1, ZEB2, PTEN, CXCL12, GAPDHS, TNS3, DNAHC5, HIF1A, SYNE2, CNTN2, RELN, FOXC1, APBB2, NR2F2	461	284	13588	1.66057
GOTERM_BP_FAT	GO:0051674~localization of cell	16	2.35988	0.0596204	0.674919	ELANE, SLC37A4, ASTN1, ZEB2, PTEN, CXCL12, GAPDHS, TNS3, DNAHC5, HIF1A, SYNE2, CNTN2, RELN, FOXC1, APBB2, NR2F2	461	284	13588	1.66057
GOTERM_BP_FAT	GO:0005996~monosaccharide metabolic process	12	1.76991	0.0602976	0.676092	GAPDHS, WDTC1, GALM, G6PC, TALDO1, GBE1, GCK, PYGL, FN3K, SLC37A4, ALDOB, PPP1CB	461	191	13588	1.85184
GOTERM_BP_FAT	GO:0032508~DNA duplex unwinding	3	0.442478	0.0603116	0.673122	TOP1, MCM2, TOP3B	461	12	13588	7.36876
GOTERM_BP_FAT	GO:0003002~regionalization	13	1.9174	0.0604438	0.670914	TBX3, SMAD3, CYP26A1, ZEB2, HHEX, DLX1, LHX1, HIPK2, TRP63, FOXC1, RELN, NR2F2, PCSK6	461	214	13588	1.79054
GOTERM_BP_FAT	GO:0019318~hexose metabolic process	11	1.62242	0.061537	0.674668	GAPDHS, WDTC1, GALM, G6PC, TALDO1, GBE1, GCK, PYGL, SLC37A4, ALDOB, PPP1CB	461	169	13588	1.91849
GOTERM_BP_FAT	GO:0048729~tissue morphogenesis	14	2.0649	0.0615966	0.67205	TBX3, SMAD7, BTRC, ESR1, SMAD3, FZD3, ZEB2, NR3C1, NR4A3, HHEX, NCOA3, TRP63, FOXC1, IPMK	461	238	13588	1.73383
GOTERM_BP_FAT	GO:0001763~morphogenesis of a branching structure	9	1.32743	0.0619238	0.67109	HHEX, EPHA7, GCM1, TBX3, NCOA3, BTRC, TRP63, ESR1, CXCL12	461	125	13588	2.1222
GOTERM_BP_FAT	GO:0016477~cell migration	14	2.0649	0.0648588	0.685619	SLC37A4, ELANE, ASTN1, ZEB2, CXCL12, PTEN, TNS3, HIF1A, SYNE2, CNTN2, RELN, FOXC1, APBB2, NR2F2	461	240	13588	1.71938
GOTERM_BP_FAT	GO:0046660~female sex differentiation	6	0.884956	0.0651516	0.684415	TBX3, NCOA3, TRP63, ESR1, FOXC1, FOXO3	461	64	13588	2.76329
GOTERM_BP_FAT	GO:0045821~positive regulation of glycolysis	2	0.294985	0.0665632	0.689605	GAPDHS, MLXIPL	461	2	13588	29.4751
GOTERM_BP_FAT	GO:0051156~glucose 6-phosphate metabolic process	2	0.294985	0.0665632	0.689605	G6PC, GCK	461	2	13588	29.4751
GOTERM_BP_FAT	GO:0009967~positive regulation of signal transduction	11	1.62242	0.0675865	0.692492	HHEX, HIF1A, ECE1, HIPK2, ZAP70, ADRA1A, LPAR3, RELN, ZEB2, FGF21, CITED2	461	172	13588	1.88503
GOTERM_BP_FAT	GO:0021846~cell proliferation in forebrain	3	0.442478	0.0697215	0.701338	HHEX, ZEB2, TACC3	461	13	13588	6.80194
GOTERM_BP_FAT	GO:0046580~negative regulation of Ras protein signal transduction	3	0.442478	0.0697215	0.701338	ADRA1B, ADRA1A, BCL6	461	13	13588	6.80194
GOTERM_BP_FAT	GO:0046520~sphingoid biosynthetic process	3	0.442478	0.0697215	0.701338	SAMD8, SGMS2, SPHK2	461	13	13588	6.80194
GOTERM_BP_FAT	GO:0051058~negative regulation of small GTPase mediated signal transduction	3	0.442478	0.0697215	0.701338	ADRA1B, ADRA1A, BCL6	461	13	13588	6.80194
GOTERM_BP_FAT	GO:0031331~positive regulation of cellular catabolic process	3	0.442478	0.0697215	0.701338	GAPDHS, ADRA1B, MLXIPL	461	13	13588	6.80194
GOTERM_BP_FAT	GO:0006171~cAMP biosynthetic process	3	0.442478	0.0697215	0.701338	ADCY2, ADCY9, ADCY8	461	13	13588	6.80194
GOTERM_BP_FAT	GO:0032392~DNA geometric change	3	0.442478	0.0697215	0.701338	TOP1, MCM2, TOP3B	461	13	13588	6.80194
GOTERM_BP_FAT	GO:0009110~vitamin biosynthetic process	4	0.589971	0.0735662	0.718567	TPK1, ALDH8A1, HAAO, DHRS9	461	29	13588	4.06552
GOTERM_BP_FAT	GO:0048514~blood vessel morphogenesis	12	1.76991	0.07379	0.716959	HIF1A, HTATIP2, SMAD7, ITGA7, ADRA1B, FOXC1, NR2F2, ARHGAP24, FIGF, PTEN, CXCL12, CITED2	461	198	13588	1.78637
GOTERM_BP_FAT	GO:0001890~placenta development	7	1.03245	0.0744142	0.71737	CEBPA, HIF1A, GCM1, SP1, TTPA, BIRC2, CITED2	461	87	13588	2.37156
GOTERM_BP_FAT	GO:0009952~anterior/posterior pattern formation	10	1.47493	0.0757901	0.721473	HHEX, TBX3, LHX1, HIPK2, CYP26A1, SMAD3, FOXC1, ZEB2, NR2F2, PCSK6	461	153	13588	1.92647
GOTERM_BP_FAT	GO:0006916~anti-apoptosis	7	1.03245	0.0777031	0.728028	TBX3, SPHK2, TRP63, ESR1, FOXC1, DAPK1, CITED2	461	88	13588	2.34461
GOTERM_BP_FAT	GO:0010001~glial cell differentiation	5	0.737463	0.0785837	0.729552	GCM1, ERBB3, NAB2, RELN, EIF2B3	461	48	13588	3.07032
GOTERM_BP_FAT	GO:0042398~cellular amino acid derivative biosynthetic process	5	0.737463	0.0785837	0.729552	CHDH, GAMT, AGMAT, GCLM, ADC	461	48	13588	3.07032
GOTERM_BP_FAT	GO:0042771~DNA damage response, signal transduction by p53 class mediator resulting in induction of apoptosis	3	0.442478	0.0795717	0.731546	BBC3, HIPK2, TRP63	461	14	13588	6.31608
GOTERM_BP_FAT	GO:0000097~sulfur amino acid biosynthetic process	3	0.442478	0.0795717	0.731546	MTHFD1, CTH, BHMT2	461	14	13588	6.31608
GOTERM_BP_FAT	GO:0017015~regulation of transforming growth factor beta receptor signaling pathway	4	0.589971	0.0797742	0.729894	SMAD7, HIPK2, SMAD3, CITED2	461	30	13588	3.93001
GOTERM_BP_FAT	GO:0030005~cellular di-, tri-valent inorganic cation homeostasis	9	1.32743	0.0850154	0.750609	FTL1, HIF1A, ACO1, SLC37A4, STIM2, ADRA1A, 1300017J02RIK, GPR12, TRF	461	134	13588	1.97967
GOTERM_BP_FAT	GO:0051056~regulation of small GTPase mediated signal transduction	13	1.9174	0.0873829	0.758031	AGFG2, ARHGEF19, RGL1, RASAL2, RASGRP3, TBC1D13, ADRA1B, ADRA1A, RAPGEF4, RELN, BCL6, RAPGEF1, ARAP2	461	228	13588	1.6806
GOTERM_BP_FAT	GO:0009894~regulation of catabolic process	5	0.737463	0.0883518	0.759534	GAPDHS, NPC1, ADRA1B, MLXIPL, FAF1	461	50	13588	2.94751
GOTERM_BP_FAT	GO:0009084~glutamine family amino acid biosynthetic process	3	0.442478	0.0898217	0.763014	PYCR1, ALDH4A1, PRODH	461	15	13588	5.89501
GOTERM_BP_FAT	GO:0019439~aromatic compound catabolic process	3	0.442478	0.0898217	0.763014	PAH, AFMID, HPD	461	15	13588	5.89501
GOTERM_BP_FAT	GO:0006631~fatty acid metabolic process	11	1.62242	0.0954746	0.782216	FAR2, PNPLA8, ACSL1, SCD2, CYP2D22, FADS1, FADS3, ACAA1A, FADS6, PHYH, HPGD	461	184	13588	1.7621
GOTERM_BP_FAT	GO:0008202~steroid metabolic process	10	1.47493	0.0965661	0.783855	SREBF1, ACBD3, NPC1, G6PC, LDLR, SERPINA6, SLC37A4, ESR1, HSD11B1, NR3C1	461	161	13588	1.83075
GOTERM_BP_FAT	GO:0044093~positive regulation of molecular function	16	2.35988	0.09735	0.784366	ADCY2, SPHK2, CREBBP, TLR1, SLC37A4, STIM2, LPAR3, ZEB2, GCLM, GNAQ, ADCY9, BBC3, HIPK2, ADRA1A, RELN, 4933411G11RIK	461	306	13588	1.54118
GOTERM_BP_FAT	GO:0006686~sphingomyelin biosynthetic process	2	0.294985	0.0981678	0.784991	SAMD8, SGMS2	461	3	13588	19.65
GOTERM_BP_FAT	GO:0015760~glucose-6-phosphate transport	2	0.294985	0.0981678	0.784991	G6PC, SLC37A4	461	3	13588	19.65
GOTERM_BP_FAT	GO:0003057~regulation of the force of heart contraction by chemical signal	2	0.294985	0.0981678	0.784991	ADRA1B, ADRA1A	461	3	13588	19.65
GOTERM_BP_FAT	GO:0001997~positive regulation of the force of heart contraction by epinephrine-norepinephrine	2	0.294985	0.0981678	0.784991	ADRA1B, ADRA1A	461	3	13588	19.65
GOTERM_BP_FAT	GO:0015712~hexose phosphate transport	2	0.294985	0.0981678	0.784991	G6PC, SLC37A4	461	3	13588	19.65
GOTERM_BP_FAT	GO:0006110~regulation of glycolysis	2	0.294985	0.0981678	0.784991	GAPDHS, MLXIPL	461	3	13588	19.65
GOTERM_BP_FAT	GO:0042994~cytoplasmic sequestering of transcription factor	2	0.294985	0.0981678	0.784991	FAF1, TACC3	461	3	13588	19.65
GOTERM_BP_FAT	GO:0003099~positive regulation of the force of heart contraction by chemical signal	2	0.294985	0.0981678	0.784991	ADRA1B, ADRA1A	461	3	13588	19.65
GOTERM_BP_FAT	GO:0006089~lactate metabolic process	2	0.294985	0.0981678	0.784991	HIF1A, SLC37A4	461	3	13588	19.65
GOTERM_BP_FAT	GO:0042063~gliogenesis	5	0.737463	0.0986746	0.784513	GCM1, ERBB3, NAB2, RELN, EIF2B3	461	52	13588	2.83414
GOTERM_BP_FAT	GO:0014032~neural crest cell development	4	0.589971	0.099683	0.785798	HIF1A, CYP26A1, FOXC1, ZEB2	461	33	13588	3.57273
GOTERM_BP_FAT	GO:0014033~neural crest cell differentiation	4	0.589971	0.099683	0.785798	HIF1A, CYP26A1, FOXC1, ZEB2	461	33	13588	3.57273

## Sheet: A-up_3-24
Category	Term	Count	%	PValue	Benjamini-Corrected PValue	Genes	List Total	Pop Hits	Pop Total	Fold Enrichment
GOTERM_MF_FAT	GO:0032559~adenyl ribonucleotide binding	64	11.4901	0.000504831	0.253885	XRCC5, CDK17, ADCY2, ADCY8, XRCC6, TTK, INO80, CCT3, ACSS2, MTHFD1, TPK1, TOP1, PRKAR2A, LONP2, SLK, B230120H23RIK, NARS2, CLK4, RAPGEF4, MDN1, NLRP4F, CDK15, KIF13B, MYO6, PAN3, SGK2, ROCK2, DARS2, OXGR1, UBE2H, HLTF, BBS10, DAPK1, KIF1C, MAST4, PANK2, DNAHC5, BAZ1B, ABCB1A, ABCB1B, ADK, HIPK2, CSNK1G3, SMARCA2, BTAF1, CHKA, IFIH1, DCK, WARS2, 0610007P08RIK, ACSL1, DDX3X, MAP3K3, CHD1, CHD6, PAP…	380	1460	13288	1.53286
GOTERM_MF_FAT	GO:0032553~ribonucleotide binding	75	13.465	0.00059576	0.158713	XRCC5, GNA14, CDK17, ADCY2, ADCY8, XRCC6, INO80, TTK, CCT3, ACSS2, MTHFD1, TPK1, TOP1, PRKAR2A, ARHGAP5, LONP2, SLK, B230120H23RIK, NARS2, CLK4, RHOA, RAPGEF4, MDN1, CDK15, NLRP4F, KIF13B, MYO6, PAN3, SGK2, ROCK2, DARS2, OXGR1, UBE2H, HLTF, BBS10, DAPK1, KIF1C, MAST4, PANK2, DNAHC5, BAZ1B, GNAQ, ABCB1A, ABCB1B, ADK, HIPK2, CSNK1G3, SMARCA2, BTAF1, CHKA, IFIH1, TUBA3B, DCK, WARS2, RRAGC, 0610007P0…	380	1796	13288	1.46026
GOTERM_MF_FAT	GO:0032555~purine ribonucleotide binding	75	13.465	0.00059576	0.158713	XRCC5, GNA14, CDK17, ADCY2, ADCY8, XRCC6, INO80, TTK, CCT3, ACSS2, MTHFD1, TPK1, TOP1, PRKAR2A, ARHGAP5, LONP2, SLK, B230120H23RIK, NARS2, CLK4, RHOA, RAPGEF4, MDN1, CDK15, NLRP4F, KIF13B, MYO6, PAN3, SGK2, ROCK2, DARS2, OXGR1, UBE2H, HLTF, BBS10, DAPK1, KIF1C, MAST4, PANK2, DNAHC5, BAZ1B, GNAQ, ABCB1A, ABCB1B, ADK, HIPK2, CSNK1G3, SMARCA2, BTAF1, CHKA, IFIH1, TUBA3B, DCK, WARS2, RRAGC, 0610007P0…	380	1796	13288	1.46026
GOTERM_MF_FAT	GO:0001883~purine nucleoside binding	66	11.8492	0.000839792	0.149923	XRCC5, CDK17, ADCY2, ADCY8, XRCC6, TTK, INO80, CCT3, ACSS2, MTHFD1, TPK1, TOP1, PRKAR2A, LONP2, SLK, B230120H23RIK, NARS2, CLK4, RAPGEF4, MDN1, NLRP4F, CDK15, KIF13B, MYO6, PAN3, SGK2, ROCK2, DARS2, OXGR1, UBE2H, HLTF, BBS10, DAPK1, KIF1C, MAST4, PANK2, DNAHC5, BAZ1B, ABCB1A, ABCB1B, ADK, HIPK2, CSNK1G3, SMARCA2, BTAF1, CHKA, ACADSB, IFIH1, DCK, WARS2, RRAGC, 0610007P08RIK, ACSL1, DDX3X, MAP3K3, …	380	1548	13288	1.4909
GOTERM_MF_FAT	GO:0001882~nucleoside binding	66	11.8492	0.000977221	0.132176	XRCC5, CDK17, ADCY2, ADCY8, XRCC6, TTK, INO80, CCT3, ACSS2, MTHFD1, TPK1, TOP1, PRKAR2A, LONP2, SLK, B230120H23RIK, NARS2, CLK4, RAPGEF4, MDN1, NLRP4F, CDK15, KIF13B, MYO6, PAN3, SGK2, ROCK2, DARS2, OXGR1, UBE2H, HLTF, BBS10, DAPK1, KIF1C, MAST4, PANK2, DNAHC5, BAZ1B, ABCB1A, ABCB1B, ADK, HIPK2, CSNK1G3, SMARCA2, BTAF1, CHKA, ACADSB, IFIH1, DCK, WARS2, RRAGC, 0610007P08RIK, ACSL1, DDX3X, MAP3K3, …	380	1558	13288	1.48133
GOTERM_MF_FAT	GO:0005496~steroid binding	7	1.25673	0.000999614	0.109537	GC, SERPINA6, NR3C2, ESR1, ESRRG, PAQR7, NR3C1	380	41	13288	5.97022
GOTERM_MF_FAT	GO:0016564~transcription repressor activity	16	2.87253	0.00107277	0.0985558	ZBTB32, BCLAF1, TBX3, THRB, JARID2, RYBP, TLE4, CBX3, ZEB2, RBBP7, FOXP1, CBX5, ATXN1, HHEX, HIPK2, TOB1	380	211	13288	2.65163
GOTERM_MF_FAT	GO:0030554~adenyl nucleotide binding	65	11.6697	0.00108777	0.086232	XRCC5, CDK17, ADCY2, ADCY8, XRCC6, TTK, INO80, CCT3, ACSS2, MTHFD1, TPK1, TOP1, PRKAR2A, LONP2, SLK, B230120H23RIK, NARS2, CLK4, RAPGEF4, MDN1, NLRP4F, CDK15, KIF13B, MYO6, PAN3, SGK2, ROCK2, DARS2, OXGR1, UBE2H, HLTF, BBS10, DAPK1, KIF1C, MAST4, PANK2, DNAHC5, BAZ1B, ABCB1A, ABCB1B, ADK, HIPK2, CSNK1G3, SMARCA2, BTAF1, CHKA, ACADSB, IFIH1, DCK, WARS2, 0610007P08RIK, ACSL1, DDX3X, MAP3K3, CHD1, C…	380	1535	13288	1.48075
GOTERM_MF_FAT	GO:0017076~purine nucleotide binding	76	13.6445	0.00117688	0.0818313	XRCC5, GNA14, CDK17, ADCY2, ADCY8, XRCC6, INO80, TTK, CCT3, ACSS2, MTHFD1, TPK1, TOP1, PRKAR2A, ARHGAP5, LONP2, SLK, B230120H23RIK, NARS2, CLK4, RHOA, RAPGEF4, MDN1, CDK15, NLRP4F, KIF13B, MYO6, PAN3, SGK2, ROCK2, DARS2, OXGR1, UBE2H, HLTF, BBS10, DAPK1, KIF1C, MAST4, PANK2, DNAHC5, BAZ1B, GNAQ, ABCB1A, ABCB1B, ADK, HIPK2, CSNK1G3, SMARCA2, BTAF1, CHKA, IFIH1, ACADSB, TUBA3B, DCK, WARS2, RRAGC, 0…	380	1871	13288	1.42042
GOTERM_MF_FAT	GO:0005524~ATP binding	61	10.9515	0.00170474	0.104125	XRCC5, CDK17, ADCY2, ADCY8, XRCC6, TTK, INO80, CCT3, ACSS2, MTHFD1, TPK1, TOP1, LONP2, SLK, B230120H23RIK, NARS2, CLK4, MDN1, NLRP4F, CDK15, KIF13B, SGK2, PAN3, MYO6, ROCK2, DARS2, UBE2H, HLTF, BBS10, DAPK1, KIF1C, MAST4, PANK2, DNAHC5, BAZ1B, ABCB1A, ABCB1B, ADK, HIPK2, CSNK1G3, SMARCA2, BTAF1, CHKA, IFIH1, DCK, WARS2, 0610007P08RIK, ACSL1, DDX3X, MAP3K3, CHD1, CHD6, PAPSS2, ABCA8B, TAOK3, AK2, …	380	1443	13288	1.47822
GOTERM_MF_FAT	GO:0046914~transition metal ion binding	98	17.5943	0.00239499	0.129838	MOCOS, THRB, MYLIP, ZFP788, MLL5, TRP63, ZFP831, ZFP830, RARB, ZFP273, RREB1, ROCK2, ZFP467, NRD1, CYP26A1, PPP1CB, ZFP592, OGFOD1, BAZ1B, ZFP462, MTF2, RELN, RNF20, XRN2, FBXO11, ZFAND6, IFIH1, AGFG1, PAH, ZFP619, ZFP617, TRF, ECE1, OTUD7B, RNF13, BHMT2, ZMYM2, PTGR1, SCD2, RABIF, LPP, CREBBP, RYBP, ESRRG, ZFP148, ZFP606, FOXP1, SUV39H2, ZFP609, ATF7, PRKRIR, ZBTB32, CYB5R4, KDM6A, ZEB2, ZZEF1, …	380	2608	13288	1.314
GOTERM_MF_FAT	GO:0003707~steroid hormone receptor activity	7	1.25673	0.00256793	0.126785	THRB, NR3C2, ESR1, ESRRG, NR0B2, NR3C1, RARB	380	49	13288	4.99549
GOTERM_MF_FAT	GO:0046872~metal ion binding	136	24.4165	0.00263831	0.119871	MOCOS, ADCY2, THRB, ADCY8, FAM20C, MYLIP, ZFP788, CLYBL, MLL5, B230120H23RIK, TRP63, ZFP831, ZFP830, ZFP273, RARB, PLS3, ROCK2, RREB1, NCALD, NUDT5, ZFP467, STIM2, NRD1, CYP26A1, PDE4D, PPP1CB, ZFP592, OGFOD1, PLCE1, PGM5, BAZ1B, ZFP462, MTF2, RELN, RNF20, XRN2, FBXO11, ZFAND6, SLC38A4, IFIH1, AGFG1, ENPP2, PAH, ZFP619, ZFP617, TRF, ECE1, OTUD7B, SEC23IP, RNF13, BHMT2, ZMYM2, PTGR1, SCD2, RABIF, …	380	3850	13288	1.23525
GOTERM_MF_FAT	GO:0043169~cation binding	137	24.5961	0.00269066	0.113263	MOCOS, ADCY2, THRB, ADCY8, FAM20C, MYLIP, ZFP788, CLYBL, MLL5, B230120H23RIK, TRP63, ZFP831, ZFP830, ZFP273, RARB, PLS3, ROCK2, RREB1, NCALD, NUDT5, ZFP467, STIM2, NRD1, CYP26A1, PDE4D, PPP1CB, ZFP592, OGFOD1, PLCE1, PGM5, BAZ1B, ZFP462, MTF2, RELN, RNF20, XRN2, FBXO11, ZFAND6, SLC38A4, IFIH1, AGFG1, ENPP2, PAH, ZFP619, ZFP617, TRF, ECE1, OTUD7B, SEC23IP, RNF13, BHMT2, ZMYM2, PTGR1, SCD2, RABIF, …	380	3885	13288	1.23312
GOTERM_MF_FAT	GO:0004386~helicase activity	11	1.97487	0.003839	0.147302	XRCC5, 0610007P08RIK, BTAF1, IFIH1, DDX3X, XRCC6, INO80, CHD1, HLTF, CHD6, SMARCA2	380	129	13288	2.9818
GOTERM_MF_FAT	GO:0008081~phosphoric diester hydrolase activity	8	1.43627	0.00435493	0.155287	PDE7B, PLCE1, PLCG1, ENPP2, GPLD1, PDE4D, PLCB1, PLCXD2	380	72	13288	3.88538
GOTERM_MF_FAT	GO:0043167~ion binding	137	24.5961	0.00439509	0.147577	MOCOS, ADCY2, THRB, ADCY8, FAM20C, MYLIP, ZFP788, CLYBL, MLL5, B230120H23RIK, TRP63, ZFP831, ZFP830, ZFP273, RARB, PLS3, ROCK2, RREB1, NCALD, NUDT5, ZFP467, STIM2, NRD1, CYP26A1, PDE4D, PPP1CB, ZFP592, OGFOD1, PLCE1, PGM5, BAZ1B, ZFP462, MTF2, RELN, RNF20, XRN2, FBXO11, ZFAND6, SLC38A4, IFIH1, AGFG1, ENPP2, PAH, ZFP619, ZFP617, TRF, ECE1, OTUD7B, SEC23IP, RNF13, BHMT2, ZMYM2, PTGR1, SCD2, RABIF, …	380	3934	13288	1.21776
GOTERM_MF_FAT	GO:0004879~ligand-dependent nuclear receptor activity	7	1.25673	0.00504777	0.158571	THRB, NR3C2, ESR1, ESRRG, NR0B2, NR3C1, RARB	380	56	13288	4.37105
GOTERM_MF_FAT	GO:0003677~DNA binding	69	12.3878	0.00675307	0.196145	XRCC5, HLF, THRB, XRCC6, INO80, ZEB2, TOP1, SLK, TRP63, RARB, NFX1, ZFP35, RREB1, RCOR1, ESR1, ZFP467, TLE4, ARNTL, NR0B2, HLTF, FOXN3, ZFP592, FMN1, MED6, HHEX, HIF1A, NCOA3, MTF2, HIPK2, LCOR, SMARCA2, CLOCK, ZFAND6, RAD23B, GLIS3, BTAF1, HMGB2, IFIH1, BCLAF1, ZFP397, AGFG1, GPBP1L1, ABTB2, NR3C2, NR3C1, MEIS1, ARID2, C79407, 0610007P08RIK, TCERG1, DDX3X, OTUD7B, CHD1, CHD6, TBX3, JARID2, CREBB…	380	1781	13288	1.35476
GOTERM_MF_FAT	GO:0000166~nucleotide binding	81	14.5422	0.00912223	0.244024	XRCC5, GNA14, CDK17, ADCY2, ADCY8, XRCC6, INO80, TTK, CCT3, ACSS2, MTHFD1, TPK1, TOP1, PRKAR2A, ARHGAP5, LONP2, SLK, B230120H23RIK, NARS2, CLK4, RHOA, RAPGEF4, MDN1, CDK15, NLRP4F, KIF13B, MYO6, PAN3, SGK2, ROCK2, DARS2, OXGR1, UBE2H, HLTF, BBS10, DAPK1, KIF1C, SLTM, MAST4, PANK2, DNAHC5, BAZ1B, GNAQ, ABCB1A, ABCB1B, ADK, HIPK2, CSNK1G3, SMARCA2, BTAF1, CHKA, IFIH1, ACADSB, TUBA3B, DCK, WARS2, RR…	380	2183	13288	1.2975
GOTERM_MF_FAT	GO:0016298~lipase activity	8	1.43627	0.0100275	0.253429	PNPLA8, PLCE1, PLCG1, GPLD1, LIPC, PLCB1, PLCXD2, IAH1	380	84	13288	3.33033
GOTERM_MF_FAT	GO:0031406~carboxylic acid binding	8	1.43627	0.010668	0.256379	OGFOD1, ACBD3, P4HA1, NEDD4, PAH, PHYH, AGXT, SLC19A2	380	85	13288	3.29115
GOTERM_MF_FAT	GO:0008270~zinc ion binding	78	14.0036	0.0110535	0.254002	ZBTB32, THRB, ZEB2, MYLIP, ZFP788, BUD31, ZZEF1, FANCL, LNPEP, PRMT3, MLL5, TRP63, ZFP831, ZFP830, ZFP273, RANBP2, RARB, NFX1, ZFP35, CAR14, RREB1, ROCK2, ESR1, ZFP467, NRD1, HLTF, ZFP592, HAGH, BAZ1B, ZFP462, MTF2, ZFAND2B, RELN, RNF20, XRN2, FBXO11, ZFP420, ZFAND6, GLIS3, IFIH1, USP3, ZFP397, AGFG1, NR3C2, DPYS, TRIM15, NR3C1, ZFP619, ARID2, ZFP617, MYCBP2, ECE1, RASGRP3, OTUD7B, RNF13, RNF144B…	380	2105	13288	1.29574
GOTERM_MF_FAT	GO:0003682~chromatin binding	11	1.97487	0.0134153	0.288649	BAZ1B, NCOA3, CREBBP, TRP63, CBX3, CHD1, TLE4, CHD6, FOXP1, CBX5, SUV39H2	380	155	13288	2.48163
GOTERM_MF_FAT	GO:0004629~phospholipase C activity	4	0.718133	0.0158866	0.320915	PLCE1, PLCG1, PLCB1, PLCXD2	380	19	13288	7.36177
GOTERM_MF_FAT	GO:0030528~transcription regulator activity	48	8.61759	0.017078	0.329433	ENY2, ZBTB32, GLIS3, HLF, BCLAF1, ZFP397, THRB, NR3C2, CBX3, ZEB2, NR3C1, ARID2, MEIS1, CBX5, MLL5, TCERG1, TRP63, RARB, NFX1, TBX3, PCBD1, JARID2, CREBBP, ESR1, ESRRG, RYBP, TLE4, ZFP148, NR0B2, ARNTL, RBBP7, HLTF, FOXP1, FOXN3, MED6, ATXN1, HHEX, HIF1A, SP1, NCOA3, IRF6, ATF7, HIPK2, IRF2, LCOR, CLOCK, TOB1, NFIB	380	1206	13288	1.39178
GOTERM_MF_FAT	GO:0046983~protein dimerization activity	18	3.2316	0.0181596	0.335568	CHKA, HLF, CADM1, THRB, ADIPOR2, PAH, NR3C1, MEIS1, GCLM, FOXP1, RRAGC, MYCBP2, HIF1A, ATF7, CTSE, FIGF, PRKRIR, AXIN1	380	340	13288	1.85127
GOTERM_MF_FAT	GO:0016208~AMP binding	4	0.718133	0.0183026	0.327538	PRKAR2A, RAPGEF4, OXGR1, ACSS2	380	20	13288	6.99368
GOTERM_MF_FAT	GO:0019842~vitamin binding	9	1.6158	0.0224795	0.375598	OGFOD1, GC, MOCOS, CTH, P4HA1, TTPA, PHYH, AGXT, SLC19A2	380	121	13288	2.60096
GOTERM_MF_FAT	GO:0042562~hormone binding	4	0.718133	0.0298921	0.454995	LNPEP, LEPR, ESR1, ADIPOR2	380	24	13288	5.82807
GOTERM_MF_FAT	GO:0030695~GTPase regulator activity	18	3.2316	0.0304097	0.449565	RABIF, AGFG1, DOCK8, ARHGAP24, DOCK6, RGL1, RASAL2, PLCE1, ARHGAP5, RASGRP3, RABEP1, RIN2, CHN2, RAPGEF4, ARAP2, EIF2B3, GM5820, BCAR3	380	361	13288	1.74358
GOTERM_MF_FAT	GO:0051020~GTPase binding	6	1.0772	0.0315808	0.451407	RASGRP3, DOCK8, DAAM1, DIAP2, DOCK6, DIAP3	380	62	13288	3.38404
GOTERM_MF_FAT	GO:0004620~phospholipase activity	6	1.0772	0.0335318	0.461079	PNPLA8, PLCE1, PLCG1, GPLD1, PLCB1, PLCXD2	380	63	13288	3.33033
GOTERM_MF_FAT	GO:0003712~transcription cofactor activity	11	1.97487	0.0337004	0.45257	ENY2, MED6, ZBTB32, MLL5, NCOA3, PCBD1, HIPK2, CREBBP, RYBP, TLE4, TOB1	380	180	13288	2.13696
GOTERM_MF_FAT	GO:0060589~nucleoside-triphosphatase regulator activity	18	3.2316	0.0345273	0.450861	RABIF, AGFG1, DOCK8, ARHGAP24, DOCK6, RGL1, RASAL2, PLCE1, ARHGAP5, RASGRP3, RABEP1, RIN2, CHN2, RAPGEF4, ARAP2, EIF2B3, GM5820, BCAR3	380	367	13288	1.71507
GOTERM_MF_FAT	GO:0008134~transcription factor binding	15	2.693	0.0371361	0.46587	ENY2, ZBTB32, PCBD1, CREBBP, RYBP, TLE4, ARNTL, ARID2, MED6, MLL5, NCOA3, HIPK2, LCOR, CLOCK, TOB1	380	288	13288	1.82127
GOTERM_MF_FAT	GO:0005506~iron ion binding	17	3.05206	0.0372827	0.457816	CYB5R4, KDM6A, SCD2, FADS3, CYP26A1, CYP4V3, PAH, CYP20A1, CDKAL1, 1300017J02RIK, PPP1CB, PHYH, TRF, OGFOD1, P4HA1, RRM2, HAAO	380	343	13288	1.73313
GOTERM_MF_FAT	GO:0004016~adenylate cyclase activity	3	0.5386	0.0376422	0.451989	ADCY2, ADCY9, ADCY8	380	11	13288	9.53684
GOTERM_MF_FAT	GO:0016887~ATPase activity	14	2.51346	0.0593826	0.607175	XRCC5, ABCA8B, XRCC6, INO80, HLTF, 0610007P08RIK, DNAHC5, LONP2, DDX3X, ABCB1A, ABCB1B, CHD1, CHD6, MDN1	380	281	13288	1.7422
GOTERM_MF_FAT	GO:0005085~guanyl-nucleotide exchange factor activity	9	1.6158	0.0596284	0.599211	PLCE1, RASGRP3, RABIF, RAPGEF4, DOCK8, DOCK6, EIF2B3, RGL1, BCAR3	380	147	13288	2.14092
GOTERM_MF_FAT	GO:0004435~phosphoinositide phospholipase C activity	3	0.5386	0.0667065	0.632494	PLCE1, PLCG1, PLCB1	380	15	13288	6.99368
GOTERM_MF_FAT	GO:0016597~amino acid binding	4	0.718133	0.0669088	0.624564	NEDD4, PAH, AGXT, SLC19A2	380	33	13288	4.2386
GOTERM_MF_FAT	GO:0003702~RNA polymerase II transcription factor activity	7	1.25673	0.0714172	0.640567	MED6, GLIS3, TLE4, HLTF, LCOR, MEIS1, FOXP1	380	102	13288	2.39979
GOTERM_MF_FAT	GO:0003755~peptidyl-prolyl cis-trans isomerase activity	4	0.718133	0.0770442	0.660885	PPIA, PPIL4, RANBP2, NKTR	380	35	13288	3.99639
GOTERM_MF_FAT	GO:0016791~phosphatase activity	12	2.1544	0.080353	0.668517	EYA3, PTPRK, G6PC, PPM1K, CDC14B, MTMR10, ACP2, PPAP2B, PTEN, PPP1CB, PTPRO, SACM1L	380	238	13288	1.76311
GOTERM_MF_FAT	GO:0003700~transcription factor activity	30	5.386	0.081652	0.666416	HLF, GLIS3, THRB, ZFP397, NR3C2, ZEB2, NR3C1, MEIS1, TCERG1, TRP63, RARB, NFX1, TBX3, ESRRG, ESR1, TLE4, ZFP148, NR0B2, ARNTL, FOXN3, FOXP1, HHEX, HIF1A, SP1, IRF6, ATF7, IRF2, LCOR, CLOCK, NFIB	380	776	13288	1.35187
GOTERM_MF_FAT	GO:0004505~phenylalanine 4-monooxygenase activity	2	0.359066	0.0831547	0.665341	PCBD1, PAH	380	3	13288	23.3123
GOTERM_MF_FAT	GO:0004937~alpha1-adrenergic receptor activity	2	0.359066	0.0831547	0.665341	ADRA1B, ADRA1A	380	3	13288	23.3123
GOTERM_MF_FAT	GO:0042910~xenobiotic transporter activity	2	0.359066	0.0831547	0.665341	ABCB1A, ABCB1B	380	3	13288	23.3123
GOTERM_MF_FAT	GO:0008559~xenobiotic-transporting ATPase activity	2	0.359066	0.0831547	0.665341	ABCB1A, ABCB1B	380	3	13288	23.3123
GOTERM_MF_FAT	GO:0016859~cis-trans isomerase activity	4	0.718133	0.087808	0.678303	PPIA, PPIL4, RANBP2, NKTR	380	37	13288	3.78037
GOTERM_MF_FAT	GO:0051183~vitamin transporter activity	3	0.5386	0.091968	0.68831	GC, SLC2A2, SLC19A2	380	18	13288	5.82807
GOTERM_MF_FAT	GO:0008026~ATP-dependent helicase activity	6	1.0772	0.0990344	0.709	XRCC5, 0610007P08RIK, DDX3X, XRCC6, CHD1, CHD6	380	86	13288	2.43966
GOTERM_MF_FAT	GO:0070035~purine NTP-dependent helicase activity	6	1.0772	0.0990344	0.709	XRCC5, 0610007P08RIK, DDX3X, XRCC6, CHD1, CHD6	380	86	13288	2.43966

## Sheet: A-down_3-24
Category	Term	Count	%	PValue	Benjamini-Corrected PValue	Genes	List Total	Pop Hits	Pop Total	Fold Enrichment
GOTERM_MF_FAT	GO:0030528~transcription regulator activity	84	11.3055	3.56775e-09	2.56164e-06	BACH1, FOSL2, HMX1, FOXA3, HR, GATA2, RARA, OLIG1, SPIB, HSF4, E4F1, NFIL3, BHLHE41, MYST2, PITX1, SERTAD2, EGR1, TCFAP2A, ZFP628, HMG20B, IRF2BP2, FOSB, IRF2BP1, ECSIT, MXD1, JUNB, MXD4, ZSCAN10, JUN, HIPK3, MED18, MED9, MNT, TGIF1, FOXC1, H2-KE6, NFE2L2, DEAF1, IRX3, SBNO2, ELL, POLR2I, TRIB3, NFYB, PRDM16, FOXQ1, XBP1, JUND, BCL3, RUNX1, BCOR, TCF25, MAF, ZBTB7A, KLF6, ESRRA, CEBPB, MAFB, KLF1…	477	1206	13288	1.94032
GOTERM_MF_FAT	GO:0003677~DNA binding	103	13.8627	6.21281e-07	0.000223015	HMGN2, HMX1, IGHMBP2, GATA2, RARA, BAHCC1, OLIG1, MYST2, PITX1, HNRNPA2B1, TCFAP2A, ZFP628, HMG20B, CSDA, C130039O16RIK, JUNB, JUN, ZFP697, MNT, TGIF1, AKAP8, NFE2L2, MYNN, DEAF1, HMGB1, RAD23A, CXXC1, FOXQ1, JUND, RUNX1, TCF25, ZBTB48, KLF6, ESRRA, MAFB, KLF13, TAF8, KLF10, ARID3A, AKAP8L, TEAD1, NR4A1, SMAD1, USF2, ATF5, DLX2, FOXF1A, ATF4, GCM1, ATF3, ETS2, GTF2F1, DLX4, KLF2, GLYR1, KLF4, BAC…	477	1781	13288	1.61107
GOTERM_MF_FAT	GO:0003700~transcription factor activity	54	7.26783	4.21226e-06	0.00100763	BACH1, HMX1, FOSL2, FOXA3, GATA2, SPIB, OLIG1, RARA, HSF4, MYST2, NFIL3, PITX1, EGR1, TCFAP2A, ZFP628, HMG20B, FOSB, ECSIT, JUNB, ZSCAN10, JUN, MNT, TGIF1, FOXC1, NFE2L2, IRX3, NFYB, FOXQ1, XBP1, JUND, BCL3, RUNX1, TCF25, MAF, KLF6, ESRRA, CEBPB, MAFB, ARID3A, TEAD1, NR4A1, SMAD1, VSX2, ATF5, DLX2, FOXF1A, ATF4, GCM1, ATF3, ETS2, SP3, DLX4, KLF2, KLF4	477	776	13288	1.93853
GOTERM_MF_FAT	GO:0046983~protein dimerization activity	30	4.03769	1.4015e-05	0.00251256	BACH1, FOSL2, GGCT, HPS4, BCL2L1, GPD1L, XBP1, JUND, KRT4, NFIL3, STX1A, CEBPB, HSP90AA1, LIMK1, ARID3A, NR4A1, POLR1C, FOSB, MYH9, JUNB, INHBB, AMBP, ATF5, ADRB2, ATF4, ATF3, JUN, VEGFA, H2-KE6, NFE2L2	477	340	13288	2.45801
GOTERM_MF_FAT	GO:0043565~sequence-specific DNA binding	38	5.1144	0.000213574	0.0302069	BACH1, IRX3, HMX1, FOSL2, FOXA3, NFYB, PRDM16, GATA2, FOXQ1, XBP1, JUND, SPIB, RARA, HSF4, NFIL3, PITX1, MAF, ESRRA, CEBPB, MAFB, HNRNPA2B1, NR4A1, FOSB, VSX2, JUNB, ATF5, DLX2, ATF4, FOXF1A, ATF3, JUN, ETS2, DLX4, TGIF1, FOXC1, NFE2L2, KLF4, KDM6B	477	556	13288	1.90393
GOTERM_MF_FAT	GO:0003702~RNA polymerase II transcription factor activity	12	1.61507	0.00104661	0.117776	DEAF1, ATF5, ATF4, CEBPB, KLF13, GTF2F1, MED9, MED18, FOXC1, SMAD1, ECSIT, USF2	477	102	13288	3.27735
GOTERM_MF_FAT	GO:0003735~structural constituent of ribosome	14	1.88425	0.00303751	0.268045	RPL18, RPL36, RPL30, RPL18A, MRPS18B, RPL34, RPL9, RPS15, RPL3, UBC, RPS11, RPL10A, KPNA2, GM4925	477	151	13288	2.58281
GOTERM_MF_FAT	GO:0008134~transcription factor binding	21	2.82638	0.00367965	0.281693	MDFI, LMO4, HR, TRIB3, NFKBIA, IRF2BP2, PMF1, IRF2BP1, DDX5, PRDM16, GCM1, HIPK3, 0610009B22RIK, FOXC1, H2-KE6, ID3, BHLHE41, BCOR, RBM14, TOB2, SERTAD2	477	288	13288	2.03127
GOTERM_MF_FAT	GO:0003723~RNA binding	36	4.84522	0.0168666	0.742583	SRP14, EIF5A, SMNDC1, ISG20, IGHMBP2, ZFP36L2, DDX17, PCBP1, HNRNPF, RPL9, CTU2, DDX24, LSM4, PABPC1, RPL10A, MARS, ZFP36, GM7551, EXOSC5, HNRNPA2B1, SF1, DDX5, CSDA, MRM1, PARK7, SLBP, HNRPDL, DLX2, DDX56, EIF4A1, RBM19, ESRP2, FARSA, RPS11, RBM14, THOC3	477	672	13288	1.49236
GOTERM_MF_FAT	GO:0003724~RNA helicase activity	3	0.403769	0.0174533	0.717539	IGHMBP2, UPF1, DDX5	477	6	13288	13.9287
GOTERM_MF_FAT	GO:0016564~transcription repressor activity	15	2.01884	0.0197858	0.72867	ZBTB7A, SBNO2, HMX1, HR, TRIB3, IRF2BP2, IRF2BP1, PRDM16, ATF3, HIPK3, TGIF1, RARA, BCOR, BHLHE41, KLF4	477	211	13288	1.98039
GOTERM_MF_FAT	GO:0016755~transferase activity, transferring amino-acyl groups	4	0.538358	0.0213654	0.725338	GGT6, GGCT, TGM1, TGM2	477	17	13288	6.55469
GOTERM_MF_FAT	GO:0005159~insulin-like growth factor receptor binding	3	0.403769	0.0238605	0.736529	YWHAG, SOCS2, IGF2	477	7	13288	11.9389
GOTERM_MF_FAT	GO:0003712~transcription cofactor activity	13	1.74966	0.0286631	0.774962	HR, TRIB3, IRF2BP2, PMF1, IRF2BP1, PRDM16, DDX5, HIPK3, H2-KE6, BCOR, RBM14, BHLHE41, SERTAD2	477	180	13288	2.01193
GOTERM_MF_FAT	GO:0042802~identical protein binding	18	2.42261	0.032041	0.789613	CEBPB, CLDN19, HSP90AA1, GGCT, HPS4, ARID3A, MUL1, NR4A1, MYH9, CLDN12, CLDN14, AMBP, GPD1L, INHBB, ADRB2, VEGFA, SSNA1, S100A1	477	290	13288	1.72908
GOTERM_MF_FAT	GO:0004860~protein kinase inhibitor activity	4	0.538358	0.0331005	0.779205	CDKN1A, TRIB3, CAMK2N2, TRIB1	477	20	13288	5.57149
GOTERM_MF_FAT	GO:0000049~tRNA binding	4	0.538358	0.0331005	0.779205	IGHMBP2, CTU2, FARSA, MARS	477	20	13288	5.57149
GOTERM_MF_FAT	GO:0008026~ATP-dependent helicase activity	8	1.07672	0.0343693	0.771708	IGHMBP2, DDX56, DDX17, UPF1, DHX38, EIF4A1, DDX24, DDX5	477	86	13288	2.59139
GOTERM_MF_FAT	GO:0070035~purine NTP-dependent helicase activity	8	1.07672	0.0343693	0.771708	IGHMBP2, DDX56, DDX17, UPF1, DHX38, EIF4A1, DDX24, DDX5	477	86	13288	2.59139
GOTERM_MF_FAT	GO:0019955~cytokine binding	8	1.07672	0.0382469	0.788931	TNFRSF1A, CCR7, TNFRSF1B, IL12RB1, CRLF2, IL4RA, CNTFR, IL6RA	477	88	13288	2.53249
GOTERM_MF_FAT	GO:0004935~adrenoceptor activity	3	0.403769	0.0390127	0.777716	ADRB2, ADRB1, ADRA2A	477	9	13288	9.28581
GOTERM_MF_FAT	GO:0019210~kinase inhibitor activity	4	0.538358	0.0424344	0.789161	CDKN1A, TRIB3, CAMK2N2, TRIB1	477	22	13288	5.06499
GOTERM_MF_FAT	GO:0003714~transcription corepressor activity	7	0.942127	0.0438877	0.784429	HIPK3, HR, TRIB3, IRF2BP2, IRF2BP1, BHLHE41, BCOR	477	72	13288	2.70836
GOTERM_MF_FAT	GO:0005198~structural molecule activity	24	3.23015	0.0557272	0.846088	RPL18, COL4A1, CLDN19, LMNB2, RPL36, CLDN12, CLDN14, PXN, ACTG1, RPL30, MRPS18B, RPL18A, EPB4.1, RPL34, RPL9, RPS15, UBC, RPL3, KRT4, RPL10A, RPS11, KPNA2, CRYBB3, GM4925	477	450	13288	1.48573
GOTERM_MF_FAT	GO:0050662~coenzyme binding	11	1.48048	0.0619761	0.864297	GPD1L, STEAP4, ACOX1, ACADS, PGD, DLD, PNPO, DLAT, GLYR1, POR, DUS3L	477	160	13288	1.9152
GOTERM_MF_FAT	GO:0048037~cofactor binding	14	1.88425	0.0632643	0.858461	ACOX1, STEAP4, ACADS, PGD, SDSL, DLAT, POR, GPD1L, GOT1, DLD, FASN, PNPO, GLYR1, DUS3L	477	226	13288	1.72568
GOTERM_MF_FAT	GO:0015300~solute:solute antiporter activity	5	0.672948	0.0669976	0.863532	HIAT1, SLC24A1, SLC4A2, SLC26A11, SLC4A3	477	43	13288	3.23924
GOTERM_MF_FAT	GO:0016418~S-acetyltransferase activity	2	0.269179	0.070363	0.866659	FASN, DLAT	477	2	13288	27.8574
GOTERM_MF_FAT	GO:0000400~four-way junction DNA binding	2	0.269179	0.070363	0.866659	HMGB1, HMG20B	477	2	13288	27.8574
GOTERM_MF_FAT	GO:0016407~acetyltransferase activity	6	0.807537	0.0746941	0.873106	SAT1, FASN, DLAT, CRAT, ACAT2, MYST2	477	63	13288	2.65309
GOTERM_MF_FAT	GO:0000166~nucleotide binding	91	12.2476	0.075686	0.867103	KIFC1, ACOX1, STEAP4, ADCY1, SEPHS2, VARS2, ABCF2, TTLL8, NARS, UBE2G2, PGD, PINK1, FES, IGHMBP2, ACTG1, DDX17, OPLAH, DHX38, SULT1A1, MAP3K8, DDX24, SIK1, CHUK, GM7551, GTPBP3, PDXK, HSP90AA1, STK25, LIMK1, ACADS, HNRNPA2B1, PIM1, TBRG4, ARL16, PIM3, 1700017B05RIK, MYH9, UBE2C, POR, HNRPDL, ATP2C2, GLUL, RND1, MAPK6, HIPK3, DLD, EIF4A1, PEBP1, ESRP2, FARSA, KIF26A, ARL4C, MAP3K11, ALDH18A1, PFKF…	477	2183	13288	1.16126
GOTERM_MF_FAT	GO:0016563~transcription activator activity	15	2.01884	0.0827943	0.882313	EGR1, CEBPB, TAF8, TEAD1, NR4A1, PMF1, PRDM16, USF2, ATF4, GTF2F1, H2-KE6, NFE2L2, RUNX1, RBM14, SERTAD2	477	259	13288	1.61337
GOTERM_MF_FAT	GO:0030554~adenyl nucleotide binding	66	8.88291	0.0836802	0.876502	KIFC1, ACOX1, STEAP4, ADCY1, SEPHS2, ABCF2, VARS2, TTLL8, NARS, UBE2G2, PINK1, FES, ACTG1, IGHMBP2, DDX17, OPLAH, DHX38, MAP3K8, DDX24, SIK1, CHUK, PDXK, HSP90AA1, STK25, LIMK1, ACADS, PIM1, TBRG4, PIM3, MYH9, UBE2C, GLUL, ATP2C2, MAPK6, HIPK3, EIF4A1, DLD, PEBP1, FARSA, KIF26A, MAP3K11, ALDH18A1, PFKFB3, MKNK2, TRIB3, ABCA1, TK2, TRIB1, TTBK1, TOR1A, LMTK3, CERK, RUNX1, MARS, DUS3L, ACTB, PDK2, …	477	1535	13288	1.19778
GOTERM_MF_FAT	GO:0031406~carboxylic acid binding	7	0.942127	0.084136	0.869396	PCX, DGAT1, ACADS, PLOD3, FASN, GNMT, DLAT	477	85	13288	2.29414
GOTERM_MF_FAT	GO:0042803~protein homodimerization activity	12	1.61507	0.0871158	0.870632	AMBP, GPD1L, INHBB, ADRB2, HSP90AA1, CEBPB, GGCT, HPS4, VEGFA, ARID3A, NR4A1, MYH9	477	193	13288	1.73207
GOTERM_MF_FAT	GO:0001883~purine nucleoside binding	66	8.88291	0.0969893	0.891361	KIFC1, ACOX1, STEAP4, ADCY1, SEPHS2, ABCF2, VARS2, TTLL8, NARS, UBE2G2, PINK1, FES, ACTG1, IGHMBP2, DDX17, OPLAH, DHX38, MAP3K8, DDX24, SIK1, CHUK, PDXK, HSP90AA1, STK25, LIMK1, ACADS, PIM1, TBRG4, PIM3, MYH9, UBE2C, GLUL, ATP2C2, MAPK6, HIPK3, EIF4A1, DLD, PEBP1, FARSA, KIF26A, MAP3K11, ALDH18A1, PFKFB3, MKNK2, TRIB3, ABCA1, TK2, TRIB1, TTBK1, TOR1A, LMTK3, CERK, RUNX1, MARS, DUS3L, ACTB, PDK2, …	477	1548	13288	1.18772

## Sheet: A-up_24-36
Category	Term	Count	%	PValue	Benjamini-Corrected PValue	Genes	List Total	Pop Hits	Pop Total	Fold Enrichment
GOTERM_BP_FAT	GO:0007049~cell cycle	40	7.44879	7.03021e-07	0.00132993	KIFC1, MAD1L1, E2F2, PKMYT1, CHEK1, ANLN, RPA1, RAD21, TSPYL2, CDKN2B, HJURP, SMARCB1, MDC1, CDCA2, SIK1, TFDP1, UPF1, ANAPC5, DSN1, GMNN, LIG1, NUF2, HMG20B, 1700017B05RIK, MCM2, PMF1, TACC3, UBE2C, WEE1, SUV39H2, CCND1, CDKN1A, PLK3, MAPK6, CNTROB, SETD8, G0S2, AKAP8, CHAF1B, GADD45A	372	611	13588	2.39129
GOTERM_BP_FAT	GO:0033554~cellular response to stress	27	5.02793	4.70789e-05	0.043583	HMGB2, FOXA3, UNG, MORF4L2, CHEK1, RPA1, RAD21, MDC1, HMOX1, RTN4RL2, CRY1, SREBF1, MDFI, ATG9B, UPF1, 1110054O05RIK, LIG1, PNKP, CDKN1A, CCND1, BTG2, NUPR1, BBC3, AVPR1A, CHAF1B, GADD45A, PPP1R15A	372	404	13588	2.44115
GOTERM_BP_FAT	GO:0042127~regulation of cell proliferation	32	5.95903	7.32848e-05	0.0451914	SAT1, HMGB1, PDGFA, IFI30, NFKBIA, CXADR, RPA1, LIF, CDKN2B, RAC2, PTGES, WISP3, SMARCB1, HMOX1, ZAP70, TGM2, RARA, HSF4, RARG, KLF10, ROGDI, SIX5, NFKBIL1, ATF5, ADRB2, CDKN1A, NUPR1, XIRP1, JUN, TGIF1, MAB21L2, KLF4	372	538	13588	2.1726
GOTERM_BP_FAT	GO:0051726~regulation of cell cycle	18	3.35196	8.16592e-05	0.0379095	HMGB1, E2F2, GMNN, CHEK1, TACC3, JUNB, NFKBIL1, SCRIB, LIF, ATF5, CCND1, CDKN1A, JUN, MNT, FOXC1, SIK1, GADD45B, GADD45A	372	214	13588	3.07235
GOTERM_BP_FAT	GO:0051186~cofactor metabolic process	16	2.97952	0.000141519	0.0521725	TALDO1, ALDH1L1, HMBS, PGD, GSTT1, ACLY, GSTT3, COQ5, MTHFD2, ALAS1, GGT6, FXN, HMOX1, SDHD, VKORC1, FPGS	372	182	13588	3.21115
GOTERM_BP_FAT	GO:0045449~regulation of transcription	88	16.3873	0.000234071	0.0711966	E2F2, ZFP14, FOXA3, LMO4, MORF4L2, CBX4, RORC, PAX4, CBX5, MAGED1, IGHMBP2, MAZ, SMARCD2, HMOX1, RARA, OLIG1, SPIB, HSF4, CRY1, BHLHE41, MYST2, EGR1, RARG, SNAPC2, ZFP628, HDAC10, HMG20B, SIX5, FOSB, MBD3, MCM2, ECSIT, HMGA1, JUNB, PCGF1, HNRPDL, ZFP653, ADRB2, BTG2, 0610009B22RIK, NAB2, JUN, MED18, MNT, TGIF1, FOXC1, MYNN, DEAF1, HMGB1, HMGB2, NFKBIA, CXXC1, LIF, SUMO1, TSPYL2, ZFP566, SMARCB1, …	372	2227	13588	1.44336
GOTERM_BP_FAT	GO:0006974~response to DNA damage stimulus	20	3.72439	0.000346899	0.0895603	HMGB2, 1110054O05RIK, UPF1, UNG, LIG1, MORF4L2, CHEK1, RPA1, PNKP, CCND1, CDKN1A, RAD21, BTG2, NUPR1, MDC1, BBC3, HMOX1, CRY1, GADD45A, CHAF1B	372	287	13588	2.54543
GOTERM_BP_FAT	GO:0006357~regulation of transcription from RNA polymerase II promoter	33	6.14525	0.000371608	0.0841916	HMGB1, HMGB2, CBX4, PAX4, MAGED1, LIF, RARA, HSF4, BHLHE41, SREBF1, MAF, MDFI, EGR1, ZBTB7A, ESRRA, RARG, CEBPB, KLF13, MBD3, ECSIT, USF2, ATF5, DLX2, ADRB2, ID2, JUN, MED18, TGIF1, FOXC1, ID3, NFIC, RBM14, KLF4	372	616	13588	1.9568
GOTERM_BP_FAT	GO:0006350~transcription	71	13.2216	0.000812422	0.157135	E2F2, ZFP14, FOXA3, LMO4, MORF4L2, CBX4, RORC, PAX4, IGHMBP2, MAZ, SMARCD2, RARA, OLIG1, SPIB, HSF4, CRY1, BHLHE41, MYST2, EGR1, RARG, SNAPC2, ZFP628, HDAC10, HMG20B, SIX5, POLR1C, MBD3, MCM2, HMGA1, JUNB, PCGF1, HNRPDL, ZFP653, BTG2, 0610009B22RIK, NAB2, JUN, MED18, MNT, TGIF1, FOXC1, MYNN, DEAF1, CXXC1, TSPYL2, ZFP566, PELP1, SMARCB1, JUND, BHLHE40, TFDP1, SREBF1, MAF, ZBTB7A, ESRRA, CEBPB, KLF…	372	1772	13588	1.46355
GOTERM_BP_FAT	GO:0000278~mitotic cell cycle	17	3.16574	0.00110342	0.188599	MAD1L1, KIFC1, ANAPC5, DSN1, NUF2, ANLN, CHEK1, PMF1, UBE2C, WEE1, CCND1, RAD21, CDCA2, SETD8, AKAP8, GADD45A, TFDP1	372	244	13588	2.54491
GOTERM_BP_FAT	GO:0008285~negative regulation of cell proliferation	16	2.97952	0.00127107	0.196581	RARG, IFI30, SIX5, CXADR, NFKBIL1, CDKN1A, CDKN2B, XIRP1, NUPR1, PTGES, SMARCB1, WISP3, HMOX1, JUN, TGIF1, KLF4	372	224	13588	2.60906
GOTERM_BP_FAT	GO:0022403~cell cycle phase	20	3.72439	0.00171667	0.237412	MAD1L1, KIFC1, ANAPC5, DSN1, NUF2, ANLN, CHEK1, PMF1, TACC3, UBE2C, WEE1, SUV39H2, RPA1, CCND1, RAD21, CDCA2, SETD8, AKAP8, GADD45A, TFDP1	372	328	13588	2.22725
GOTERM_BP_FAT	GO:0006732~coenzyme metabolic process	12	2.23464	0.00187793	0.239449	MTHFD2, GGT6, TALDO1, ALDH1L1, PGD, SDHD, VKORC1, GSTT1, ACLY, GSTT3, FPGS, COQ5	372	143	13588	3.06519
GOTERM_BP_FAT	GO:0051252~regulation of RNA metabolic process	60	11.1732	0.00202885	0.24013	E2F2, ZFP14, FOXA3, CBX4, RORC, PAX4, CBX5, MAGED1, SPIB, OLIG1, RARA, HSF4, MYST2, BHLHE41, EGR1, ZFP36, RARG, ZFP628, SIX5, HMG20B, FOSB, MBD3, ECSIT, HMGA1, JUNB, ADRB2, 0610009B22RIK, JUN, MED18, MNT, TGIF1, FOXC1, HMGB1, HMGB2, LIF, ZFP566, JUND, 1700048O20RIK, BHLHE40, TFDP1, SREBF1, MDFI, MAF, ZBTB7A, ESRRA, CEBPB, KLF13, USF2, ATF5, DLX2, FOXF1A, ATF3, ID2, LASS2, DLX4, MZF1, ID3, NFIC, R…	372	1488	13588	1.47286
GOTERM_BP_FAT	GO:0006355~regulation of transcription, DNA-dependent	59	10.987	0.00233329	0.255324	E2F2, ZFP14, FOXA3, CBX4, RORC, PAX4, CBX5, MAGED1, SPIB, OLIG1, RARA, HSF4, MYST2, BHLHE41, EGR1, RARG, ZFP628, SIX5, HMG20B, FOSB, MBD3, ECSIT, HMGA1, JUNB, ADRB2, 0610009B22RIK, JUN, MED18, MNT, TGIF1, FOXC1, HMGB1, HMGB2, LIF, ZFP566, JUND, 1700048O20RIK, BHLHE40, TFDP1, SREBF1, MDFI, MAF, ZBTB7A, ESRRA, CEBPB, KLF13, USF2, ATF5, DLX2, FOXF1A, ATF3, ID2, LASS2, DLX4, MZF1, ID3, NFIC, RBM14, K…	372	1465	13588	1.47105
GOTERM_BP_FAT	GO:0045637~regulation of myeloid cell differentiation	7	1.30354	0.00254029	0.259871	LIF, ZFP36, HMGB1, ID2, KLF10, NFKBIA, TOB2	372	51	13588	5.01349
GOTERM_BP_FAT	GO:0022402~cell cycle process	22	4.09683	0.00264843	0.255693	MAD1L1, KIFC1, ANAPC5, DSN1, NUF2, ANLN, CHEK1, PMF1, TACC3, UBE2C, WEE1, SUV39H2, RPA1, CCND1, CDKN1A, RAD21, CNTROB, CDCA2, SETD8, AKAP8, GADD45A, TFDP1	372	393	13588	2.04476
GOTERM_BP_FAT	GO:0048285~organelle fission	14	2.60708	0.00298108	0.269465	MAD1L1, KIFC1, ANAPC5, DSN1, NUF2, PEX11C, ANLN, PMF1, UBE2C, WEE1, RAD21, CDCA2, SETD8, AKAP8	372	197	13588	2.59582
GOTERM_BP_FAT	GO:0051188~cofactor biosynthetic process	9	1.67598	0.00338923	0.286981	MTHFD2, ALAS1, GGT6, FXN, HMBS, VKORC1, ACLY, FPGS, COQ5	372	91	13588	3.61255
GOTERM_BP_FAT	GO:0045944~positive regulation of transcription from RNA polymerase II promoter	20	3.72439	0.00450814	0.347967	SREBF1, MAF, EGR1, HMGB1, HMGB2, ESRRA, CEBPB, RARG, KLF13, USF2, LIF, DLX2, ADRB2, JUN, RARA, FOXC1, HSF4, NFIC, RBM14, KLF4	372	358	13588	2.04061
GOTERM_BP_FAT	GO:0000122~negative regulation of transcription from RNA polymerase II promoter	15	2.7933	0.00451239	0.334809	MDFI, EGR1, ZBTB7A, RARG, CBX4, PAX4, MBD3, DLX2, ID2, TGIF1, RARA, ID3, HSF4, BHLHE41, NFIC	372	231	13588	2.37188
GOTERM_BP_FAT	GO:0006631~fatty acid metabolic process	13	2.42086	0.00467074	0.33158	SCD1, ACOX1, ACADS, FADS1, PRKAG1, RNPEPL1, CRAT, PTGES, FASN, H2-KE6, AACS, SLC27A5, DEGS1	372	184	13588	2.5807
GOTERM_BP_FAT	GO:0045892~negative regulation of transcription, DNA-dependent	18	3.35196	0.00479746	0.32686	MDFI, EGR1, ZBTB7A, RARG, CBX4, PAX4, MBD3, CBX5, DLX2, ID2, TGIF1, RARA, HSF4, ID3, BHLHE40, BHLHE41, NFIC, KLF4	372	308	13588	2.13469
GOTERM_BP_FAT	GO:0051253~negative regulation of RNA metabolic process	18	3.35196	0.00512791	0.33336	MDFI, EGR1, ZBTB7A, RARG, CBX4, PAX4, MBD3, CBX5, DLX2, ID2, TGIF1, RARA, HSF4, ID3, BHLHE40, BHLHE41, NFIC, KLF4	372	310	13588	2.12092
GOTERM_BP_FAT	GO:0006325~chromatin organization	18	3.35196	0.00597839	0.364944	HIST1H1C, MORF4L2, CBX4, HDAC10, HMG20B, MCM2, MBD3, CBX5, SUV39H2, TSPYL2, SMARCD2, SMARCB1, HJURP, SETD8, HSF4, MYST2, RBM14, TSSK6	372	315	13588	2.08725
GOTERM_BP_FAT	GO:0051094~positive regulation of developmental process	14	2.60708	0.0059812	0.353889	HMGB1, HSP90AA1, PLXNB1, KLF10, PAX4, JUNB, LIF, ADRB2, ID2, JUND, ZAP70, TGIF1, HSF4, TOB2	372	214	13588	2.38961
GOTERM_BP_FAT	GO:0000280~nuclear division	13	2.42086	0.00600853	0.344617	MAD1L1, KIFC1, ANAPC5, DSN1, NUF2, ANLN, PMF1, UBE2C, WEE1, RAD21, CDCA2, SETD8, AKAP8	372	190	13588	2.49921
GOTERM_BP_FAT	GO:0007067~mitosis	13	2.42086	0.00600853	0.344617	MAD1L1, KIFC1, ANAPC5, DSN1, NUF2, ANLN, PMF1, UBE2C, WEE1, RAD21, CDCA2, SETD8, AKAP8	372	190	13588	2.49921
GOTERM_BP_FAT	GO:0031669~cellular response to nutrient levels	5	0.931099	0.0066659	0.363755	SREBF1, ATG9B, FOXA3, HMOX1, USF2	372	28	13588	6.52266
GOTERM_BP_FAT	GO:0006412~translation	18	3.35196	0.00674983	0.357311	RPL18, EEF1A1, VARS2, RPL36, EIF5A, MTIF3, IGHMBP2, RPL30, RPL18A, RPL34, EIF4A1, UBC, RPL3, RPS11, RPL10A, KPNA2, GM4925, RPS24	372	319	13588	2.06108
GOTERM_BP_FAT	GO:0000087~M phase of mitotic cell cycle	13	2.42086	0.00707304	0.361028	MAD1L1, KIFC1, ANAPC5, DSN1, NUF2, ANLN, PMF1, UBE2C, WEE1, RAD21, CDCA2, SETD8, AKAP8	372	194	13588	2.44768
GOTERM_BP_FAT	GO:0031668~cellular response to extracellular stimulus	6	1.11732	0.00736321	0.363196	SREBF1, ATG9B, FOXA3, HMOX1, AVPR1A, USF2	372	45	13588	4.87025
GOTERM_BP_FAT	GO:0045597~positive regulation of cell differentiation	12	2.23464	0.0086445	0.401662	LIF, HMGB1, HSP90AA1, ID2, PLXNB1, KLF10, JUND, ZAP70, TGIF1, PAX4, HSF4, JUNB	372	175	13588	2.5047
GOTERM_BP_FAT	GO:0045893~positive regulation of transcription, DNA-dependent	21	3.91061	0.0103223	0.44855	SREBF1, EGR1, MAF, HMGB1, HMGB2, ESRRA, CEBPB, RARG, KLF13, USF2, LIF, DLX2, ADRB2, JUN, RARA, FOXC1, HSF4, NFIC, RBM14, KLF4, TFDP1	372	416	13588	1.84391
GOTERM_BP_FAT	GO:0051301~cell division	16	2.97952	0.0104476	0.442753	MAD1L1, KIFC1, ANAPC5, DSN1, LIG1, NUF2, ANLN, PMF1, 1700017B05RIK, UBE2C, WEE1, CCND1, RAD21, CNTROB, CDCA2, SETD8	372	281	13588	2.07982
GOTERM_BP_FAT	GO:0006605~protein targeting	10	1.8622	0.0107178	0.441671	SRP14, YWHAG, HPS4, PEX16, TIMM10, NFKBIA, 1500001M20RIK, KPNA2, KPNB1, SYNGR2	372	133	13588	2.74638
GOTERM_BP_FAT	GO:0010558~negative regulation of macromolecule biosynthetic process	21	3.91061	0.0109367	0.439124	EGR1, MDFI, ZBTB7A, SRP14, RARG, GMNN, CBX4, PAX4, MBD3, CBX5, DLX2, ID2, NAB2, TGIF1, RARA, HSF4, ID3, BHLHE40, BHLHE41, NFIC, KLF4	372	418	13588	1.83508
GOTERM_BP_FAT	GO:0001654~eye development	11	2.04842	0.0110101	0.43245	GNAT1, MAF, HMGB1, FKBP8, RARG, TGIF1, FOXC1, SIX5, HSF4, MAB21L2, KLF4	372	157	13588	2.55921
GOTERM_BP_FAT	GO:0045941~positive regulation of transcription	23	4.28305	0.0110855	0.42611	SREBF1, EGR1, MAF, HMGB1, HMGB2, ESRRA, CEBPB, RARG, KLF13, DDX5, HMGA1, USF2, LIF, DLX2, ADRB2, JUN, RARA, FOXC1, HSF4, NFIC, RBM14, KLF4, TFDP1	372	475	13588	1.76867
GOTERM_BP_FAT	GO:0000279~M phase	16	2.97952	0.0111007	0.418313	MAD1L1, KIFC1, ANAPC5, DSN1, NUF2, ANLN, PMF1, UBE2C, TACC3, WEE1, SUV39H2, RPA1, RAD21, CDCA2, SETD8, AKAP8	372	283	13588	2.06512
GOTERM_BP_FAT	GO:0051254~positive regulation of RNA metabolic process	21	3.91061	0.0112187	0.413701	SREBF1, EGR1, MAF, HMGB1, HMGB2, ESRRA, CEBPB, RARG, KLF13, USF2, LIF, DLX2, ADRB2, JUN, RARA, FOXC1, HSF4, NFIC, RBM14, KLF4, TFDP1	372	419	13588	1.8307
GOTERM_BP_FAT	GO:0045934~negative regulation of nucleobase, nucleoside, nucleotide and nucleic acid metabolic process	20	3.72439	0.0127894	0.448053	EGR1, MDFI, ZBTB7A, RARG, GMNN, CBX4, PAX4, MBD3, CBX5, DLX2, ID2, NAB2, TGIF1, RARA, HSF4, ID3, BHLHE40, BHLHE41, NFIC, KLF4	372	397	13588	1.84015
GOTERM_BP_FAT	GO:0016568~chromatin modification	14	2.60708	0.0129945	0.445406	MORF4L2, CBX4, HDAC10, HMG20B, MBD3, SUV39H2, TSPYL2, SMARCD2, SMARCB1, HJURP, SETD8, HSF4, MYST2, RBM14	372	236	13588	2.16685
GOTERM_BP_FAT	GO:0051051~negative regulation of transport	7	1.30354	0.0136926	0.454994	LIF, ADRB2, HMOX1, SH2B2, DPH3, TACC3, NFKBIL1	372	72	13588	3.55122
GOTERM_BP_FAT	GO:0016481~negative regulation of transcription	19	3.53818	0.0140671	0.456379	EGR1, MDFI, ZBTB7A, RARG, CBX4, PAX4, MBD3, CBX5, DLX2, ID2, NAB2, TGIF1, RARA, HSF4, ID3, BHLHE40, BHLHE41, NFIC, KLF4	372	372	13588	1.86562
GOTERM_BP_FAT	GO:0051172~negative regulation of nitrogen compound metabolic process	20	3.72439	0.0142608	0.4535	EGR1, MDFI, ZBTB7A, RARG, GMNN, CBX4, PAX4, MBD3, CBX5, DLX2, ID2, NAB2, TGIF1, RARA, HSF4, ID3, BHLHE40, BHLHE41, NFIC, KLF4	372	401	13588	1.82179
GOTERM_BP_FAT	GO:0031327~negative regulation of cellular biosynthetic process	21	3.91061	0.0144948	0.45166	EGR1, MDFI, ZBTB7A, SRP14, RARG, GMNN, CBX4, PAX4, MBD3, CBX5, DLX2, ID2, NAB2, TGIF1, RARA, HSF4, ID3, BHLHE40, BHLHE41, NFIC, KLF4	372	430	13588	1.78387
GOTERM_BP_FAT	GO:0010628~positive regulation of gene expression	23	4.28305	0.0147574	0.450533	SREBF1, EGR1, MAF, HMGB1, HMGB2, ESRRA, CEBPB, RARG, KLF13, DDX5, HMGA1, USF2, LIF, DLX2, ADRB2, JUN, RARA, FOXC1, HSF4, NFIC, RBM14, KLF4, TFDP1	372	488	13588	1.72155
GOTERM_BP_FAT	GO:0051276~chromosome organization	20	3.72439	0.0152334	0.454139	HIST1H1C, MORF4L2, CBX4, HDAC10, HMG20B, MCM2, MBD3, CBX5, SUV39H2, RPA1, TSPYL2, SMARCD2, SMARCB1, HJURP, SETD8, AKAP8, HSF4, MYST2, RBM14, TSSK6	372	404	13588	1.80826
GOTERM_BP_FAT	GO:0009890~negative regulation of biosynthetic process	21	3.91061	0.0161618	0.467127	EGR1, MDFI, ZBTB7A, SRP14, RARG, GMNN, CBX4, PAX4, MBD3, CBX5, DLX2, ID2, NAB2, TGIF1, RARA, HSF4, ID3, BHLHE40, BHLHE41, NFIC, KLF4	372	434	13588	1.76743
GOTERM_BP_FAT	GO:0031328~positive regulation of cellular biosynthetic process	25	4.65549	0.0168176	0.47383	HMGB1, HMGB2, EIF5A, LIF, RARA, HSF4, TFDP1, MAF, EGR1, SREBF1, ESRRA, RARG, CEBPB, HSP90AA1, KLF13, DDX5, HMGA1, USF2, DLX2, ADRB2, JUN, FOXC1, NFIC, RBM14, KLF4	372	552	13588	1.6543
GOTERM_BP_FAT	GO:0007005~mitochondrion organization	8	1.48976	0.0168329	0.46747	FXN, GGCT, BBC3, TIMM10, COX18, CXADR, 1500001M20RIK, DAP3	372	97	13588	3.01253
GOTERM_BP_FAT	GO:0051173~positive regulation of nitrogen compound metabolic process	24	4.46927	0.0180582	0.484902	SREBF1, EGR1, MAF, HMGB1, HMGB2, ESRRA, HSP90AA1, CEBPB, RARG, KLF13, DDX5, HMGA1, USF2, LIF, DLX2, ADRB2, JUN, RARA, FOXC1, HSF4, NFIC, RBM14, KLF4, TFDP1	372	526	13588	1.66663
GOTERM_BP_FAT	GO:0009891~positive regulation of biosynthetic process	25	4.65549	0.0184923	0.486586	HMGB1, HMGB2, EIF5A, LIF, RARA, HSF4, TFDP1, MAF, EGR1, SREBF1, ESRRA, RARG, CEBPB, HSP90AA1, KLF13, DDX5, HMGA1, USF2, DLX2, ADRB2, JUN, FOXC1, NFIC, RBM14, KLF4	372	557	13588	1.63945
GOTERM_BP_FAT	GO:0006281~DNA repair	13	2.42086	0.0190029	0.489604	HMGB2, UPF1, 1110054O05RIK, UNG, LIG1, MORF4L2, CHEK1, RPA1, PNKP, RAD21, MDC1, CRY1, CHAF1B	372	222	13588	2.13896
GOTERM_BP_FAT	GO:0010557~positive regulation of macromolecule biosynthetic process	24	4.46927	0.0194898	0.492078	SREBF1, EGR1, MAF, HMGB1, HMGB2, ESRRA, CEBPB, RARG, KLF13, EIF5A, DDX5, HMGA1, USF2, LIF, DLX2, ADRB2, JUN, RARA, FOXC1, HSF4, NFIC, RBM14, KLF4, TFDP1	372	530	13588	1.65405
GOTERM_BP_FAT	GO:0043068~positive regulation of programmed cell death	14	2.60708	0.0200964	0.49654	CEBPB, RARG, KLF10, BCL2L11, NFKBIL1, SCRIB, ADRB2, CDKN1A, NUPR1, BBC3, HMOX1, MTCH1, TGM2, ID3	372	250	13588	2.04551
GOTERM_BP_FAT	GO:0010942~positive regulation of cell death	14	2.60708	0.021202	0.509191	CEBPB, RARG, KLF10, BCL2L11, NFKBIL1, SCRIB, ADRB2, CDKN1A, NUPR1, BBC3, HMOX1, MTCH1, TGM2, ID3	372	252	13588	2.02927
GOTERM_BP_FAT	GO:0006633~fatty acid biosynthetic process	7	1.30354	0.0232378	0.535775	SCD1, PRKAG1, FADS1, RNPEPL1, FASN, H2-KE6, DEGS1	372	81	13588	3.15664
GOTERM_BP_FAT	GO:0045935~positive regulation of nucleobase, nucleoside, nucleotide and nucleic acid metabolic process	23	4.28305	0.0235356	0.534276	SREBF1, EGR1, MAF, HMGB1, HMGB2, ESRRA, CEBPB, RARG, KLF13, DDX5, HMGA1, USF2, LIF, DLX2, ADRB2, JUN, RARA, FOXC1, HSF4, NFIC, RBM14, KLF4, TFDP1	372	510	13588	1.64729
GOTERM_BP_FAT	GO:0045639~positive regulation of myeloid cell differentiation	4	0.744879	0.0297641	0.61454	LIF, HMGB1, ID2, KLF10	372	25	13588	5.8443
GOTERM_BP_FAT	GO:0009108~coenzyme biosynthetic process	6	1.11732	0.0302814	0.614895	MTHFD2, GGT6, VKORC1, ACLY, FPGS, COQ5	372	64	13588	3.4244
GOTERM_BP_FAT	GO:0007059~chromosome segregation	6	1.11732	0.0302814	0.614895	RAD21, DSN1, HJURP, NUF2, AKAP8, PMF1	372	64	13588	3.4244
GOTERM_BP_FAT	GO:0051789~response to protein stimulus	7	1.30354	0.031621	0.625085	EGR1, CCND1, HSP90AA1, ID2, KLF10, ID3, PPP1R15A	372	87	13588	2.93894
GOTERM_BP_FAT	GO:0010629~negative regulation of gene expression	19	3.53818	0.0330496	0.635723	EGR1, MDFI, ZBTB7A, RARG, CBX4, PAX4, MBD3, CBX5, DLX2, ID2, NAB2, TGIF1, RARA, HSF4, ID3, BHLHE40, BHLHE41, NFIC, KLF4	372	410	13588	1.69271
GOTERM_BP_FAT	GO:0022900~electron transport chain	8	1.48976	0.0337324	0.637583	NDUFA4, NDUFS6, UQCR10, NDUFS5, TXN2, FADS1, NDUFS8, SDHD	372	112	13588	2.60906
GOTERM_BP_FAT	GO:0051098~regulation of binding	7	1.30354	0.0364666	0.661038	MDFI, ADRB2, HMGB2, AKTIP, HMOX1, NFKBIA, DPH3	372	90	13588	2.84098
GOTERM_BP_FAT	GO:0010605~negative regulation of macromolecule metabolic process	22	4.09683	0.0377759	0.668616	EGR1, MDFI, ZBTB7A, SRP14, RARG, GMNN, CBX4, PAX4, MBD3, CBX5, DLX2, ID2, JUN, NAB2, TGIF1, RARA, HSF4, ID3, BHLHE40, BHLHE41, NFIC, KLF4	372	506	13588	1.58813
GOTERM_BP_FAT	GO:0046394~carboxylic acid biosynthetic process	9	1.67598	0.0395515	0.680238	SCD1, ALDH18A1, PRKAG1, FADS1, RNPEPL1, FASN, H2-KE6, DEGS1, PRODH	372	141	13588	2.3315
GOTERM_BP_FAT	GO:0016053~organic acid biosynthetic process	9	1.67598	0.0395515	0.680238	SCD1, ALDH18A1, PRKAG1, FADS1, RNPEPL1, FASN, H2-KE6, DEGS1, PRODH	372	141	13588	2.3315
GOTERM_BP_FAT	GO:0006575~cellular amino acid derivative metabolic process	9	1.67598	0.0395515	0.680238	SAT1, GGT6, GM853, EIF5A, GSTT1, GNMT, GSTT3, FABP5, AFMID	372	141	13588	2.3315
GOTERM_BP_FAT	GO:0043065~positive regulation of apoptosis	13	2.42086	0.0398751	0.677867	CEBPB, RARG, KLF10, BCL2L11, NFKBIL1, SCRIB, ADRB2, NUPR1, BBC3, HMOX1, MTCH1, TGM2, ID3	372	248	13588	1.91472
GOTERM_BP_FAT	GO:0042692~muscle cell differentiation	8	1.48976	0.041234	0.685015	ACTG1, SDC1, FOXF1A, XIRP1, SEMA4C, RARA, CXADR, IFRD1	372	117	13588	2.49756
GOTERM_BP_FAT	GO:0042594~response to starvation	4	0.744879	0.0436779	0.70113	SREBF1, ATG9B, ACADS, FOXA3	372	29	13588	5.03819
GOTERM_BP_FAT	GO:0006879~cellular iron ion homeostasis	4	0.744879	0.0436779	0.70113	FTL1, FXN, HAMP, TECR	372	29	13588	5.03819
GOTERM_BP_FAT	GO:0002761~regulation of myeloid leukocyte differentiation	4	0.744879	0.0436779	0.70113	LIF, ID2, KLF10, TOB2	372	29	13588	5.03819
GOTERM_BP_FAT	GO:0050873~brown fat cell differentiation	4	0.744879	0.0436779	0.70113	SCD1, ADRB2, CEBPB, SH2B2	372	29	13588	5.03819
GOTERM_BP_FAT	GO:0055114~oxidation reduction	27	5.02793	0.0461484	0.716262	ACOX1, ALDH1L1, ALDH18A1, TXN2, PGD, PDHB, GPD1L, NDUFS6, MTHFD2, UQCR10, NDUFS5, HMOX1, NDUFS8, FASN, VKORC1, NDUFA4, SCD1, PTGR1, ACADS, FADS1, CYP26A1, TECR, RRM2, SDHD, H2-KE6, DEGS1, PRODH	372	672	13588	1.4676
GOTERM_BP_FAT	GO:0051259~protein oligomerization	6	1.11732	0.0467106	0.715695	IGHMBP2, RRM2, C1QTNF1, TGM2, GNMT, HSF4	372	72	13588	3.04391
GOTERM_BP_FAT	GO:0006760~folic acid and derivative metabolic process	3	0.558659	0.0475445	0.717244	MTHFD2, ALDH1L1, FPGS	372	13	13588	8.42928
GOTERM_BP_FAT	GO:0002763~positive regulation of myeloid leukocyte differentiation	3	0.558659	0.0475445	0.717244	LIF, ID2, KLF10	372	13	13588	8.42928
GOTERM_BP_FAT	GO:0009132~nucleoside diphosphate metabolic process	3	0.558659	0.0475445	0.717244	RRM2, DTYMK, CANT1	372	13	13588	8.42928
GOTERM_BP_FAT	GO:0045767~regulation of anti-apoptosis	3	0.558659	0.0475445	0.717244	HMOX1, RARA, PIK3R2	372	13	13588	8.42928
GOTERM_BP_FAT	GO:0051100~negative regulation of binding	4	0.744879	0.0475811	0.712659	MDFI, ADRB2, HMOX1, NFKBIA	372	30	13588	4.87025
GOTERM_BP_FAT	GO:0008284~positive regulation of cell proliferation	14	2.60708	0.0483416	0.713672	HMGB1, PDGFA, ROGDI, LIF, RPA1, ADRB2, CDKN1A, RAC2, ZAP70, TGM2, TGIF1, RARA, HSF4, MAB21L2	372	284	13588	1.80062
GOTERM_BP_FAT	GO:0007423~sensory organ development	13	2.42086	0.0497279	0.719302	MAF, GNAT1, HMGB1, FKBP8, RARG, TMIE, SIX5, BCL2L11, TGIF1, FOXC1, HSF4, MAB21L2, KLF4	372	257	13588	1.84766
GOTERM_BP_FAT	GO:0018298~protein-chromophore linkage	3	0.558659	0.0544896	0.747785	AMBP, CRY1, OPN4	372	14	13588	7.82719
GOTERM_BP_FAT	GO:0006091~generation of precursor metabolites and energy	13	2.42086	0.0548024	0.745345	NDUFA4, TXN2, FADS1, PDHB, NDUFS6, UQCR10, NDUFS5, FXN, PYGL, SDHD, NDUFS8, GNMT, PGK1	372	261	13588	1.81935
GOTERM_BP_FAT	GO:0051260~protein homooligomerization	5	0.931099	0.0562562	0.75028	IGHMBP2, C1QTNF1, TGM2, GNMT, HSF4	372	53	13588	3.44593
GOTERM_BP_FAT	GO:0006260~DNA replication	9	1.67598	0.0569233	0.750127	RPA1, UPF1, RRM2, LIG1, MCM2, MYST2, NFIC, CHAF1B, TERT	372	152	13588	2.16278
GOTERM_BP_FAT	GO:0046620~regulation of organ growth	4	0.744879	0.0602712	0.766085	FXN, FOXC1, CXADR, BCL2L11	372	33	13588	4.4275
GOTERM_BP_FAT	GO:0035088~establishment or maintenance of apical/basal cell polarity	3	0.558659	0.0617655	0.770492	FOXF1A, SCRIB, LLGL1	372	15	13588	7.30538
GOTERM_BP_FAT	GO:0055082~cellular chemical homeostasis	13	2.42086	0.0642593	0.780145	FTL1, FOXA3, TECR, PARK7, P2RX4, XIRP1, FXN, HAMP, NAB2, TGM2, AVPR1A, MT1, GPR12	372	268	13588	1.77183
GOTERM_BP_FAT	GO:0010604~positive regulation of macromolecule metabolic process	25	4.65549	0.0653899	0.78216	HMGB1, HMGB2, EIF5A, LIF, RARA, HSF4, TFDP1, MAF, EGR1, SREBF1, ESRRA, RARG, CEBPB, KLF13, DDX5, HMGA1, USF2, DLX2, ADRB2, AKTIP, JUN, FOXC1, NFIC, RBM14, KLF4	372	633	13588	1.44261
GOTERM_BP_FAT	GO:0043010~camera-type eye development	8	1.48976	0.0655296	0.778957	MAF, FKBP8, TGIF1, FOXC1, SIX5, HSF4, MAB21L2, KLF4	372	130	13588	2.24781
GOTERM_BP_FAT	GO:0006338~chromatin remodeling	4	0.744879	0.0695182	0.795257	SMARCB1, HJURP, HMG20B, SUV39H2	372	35	13588	4.1745
GOTERM_BP_FAT	GO:0055072~iron ion homeostasis	4	0.744879	0.0695182	0.795257	FTL1, FXN, HAMP, TECR	372	35	13588	4.1745
GOTERM_BP_FAT	GO:0042770~DNA damage response, signal transduction	5	0.931099	0.0698404	0.793056	CCND1, NUPR1, BBC3, HMOX1, CHEK1	372	57	13588	3.20411
GOTERM_BP_FAT	GO:0006259~DNA metabolic process	18	3.35196	0.070127	0.790709	HMGB2, 1110054O05RIK, UPF1, UNG, LIG1, MORF4L2, CHEK1, MCM2, RPA1, PNKP, RAD21, MDC1, RRM2, NFIC, MYST2, CRY1, CHAF1B, TERT	372	421	13588	1.56172
GOTERM_BP_FAT	GO:0009991~response to extracellular stimulus	8	1.48976	0.0721476	0.79663	SREBF1, ATG9B, ACADS, FOXA3, HMOX1, AVPR1A, USF2, KLF4	372	133	13588	2.19711
GOTERM_BP_FAT	GO:0017038~protein import	6	1.11732	0.0734446	0.799001	PEX16, TIMM10, NFKBIA, 1500001M20RIK, KPNA2, KPNB1	372	82	13588	2.6727
GOTERM_BP_FAT	GO:0030005~cellular di-, tri-valent inorganic cation homeostasis	8	1.48976	0.0744386	0.799943	FTL1, FXN, HAMP, AVPR1A, TGM2, MT1, TECR, GPR12	372	134	13588	2.18071
GOTERM_BP_FAT	GO:0035148~tube lumen formation	5	0.931099	0.0772081	0.808586	LMO4, TGM2, TGIF1, BCL2L11, VASP	372	59	13588	3.0955
GOTERM_BP_FAT	GO:0006333~chromatin assembly or disassembly	7	1.30354	0.0779316	0.808239	TSPYL2, HIST1H1C, HJURP, CBX4, MCM2, CBX5, SUV39H2	372	109	13588	2.34576
GOTERM_BP_FAT	GO:0042440~pigment metabolic process	4	0.744879	0.079363	0.810852	ALAS1, HMOX1, HMBS, PPAT	372	37	13588	3.94885
GOTERM_BP_FAT	GO:0044275~cellular carbohydrate catabolic process	5	0.931099	0.0810323	0.814344	GPD1L, TALDO1, PGD, PGK1, PDHB	372	60	13588	3.04391
GOTERM_BP_FAT	GO:0045444~fat cell differentiation	5	0.931099	0.0849486	0.826319	SCD1, ADRB2, CCND1, CEBPB, SH2B2	372	61	13588	2.99401
GOTERM_BP_FAT	GO:0016310~phosphorylation	27	5.02793	0.086641	0.829431	CDK18, EFNA1, RORC, PKMYT1, CHEK1, FES, PRKX, LIF, UQCR10, FXN, TTBK1, PAK4, ZAP70, LMTK3, DYRK3, SIK1, MDFI, PKDCC, WEE1, CCND1, PLK3, MAPK6, TNK2, GADD45B, PGK1, TSSK6, MAP3K11	372	718	13588	1.37357
GOTERM_BP_FAT	GO:0006915~apoptosis	19	3.53818	0.0867434	0.8267	E2F2, FKBP8, GGCT, TBRG4, EIF5A, FADD, NFKBIL1, BCL2L11, SCRIB, DDIT4, RAD21, AKTIP, BBC3, MTCH1, MFSD10, GADD45B, PPP1R15A, DAP3, TFDP1	372	465	13588	1.4925
GOTERM_BP_FAT	GO:0019725~cellular homeostasis	15	2.7933	0.0879148	0.827881	FTL1, FOXA3, TXN2, 1810046J19RIK, TECR, PARK7, P2RX4, XIRP1, FXN, HAMP, NAB2, AVPR1A, TGM2, MT1, GPR12	372	343	13588	1.59739
GOTERM_BP_FAT	GO:0006396~RNA processing	18	3.35196	0.0886754	0.82757	ZFP36, GM7551, GTPBP3, RPP21, PPIL1, EXOSC5, QTRT1, DDX5, MRM1, SLBP, DDX56, PCBP1, HNRNPF, 2510012J08RIK, LSM4, RPL10A, THOC3, PRPF38B	372	437	13588	1.50454
GOTERM_BP_FAT	GO:0006006~glucose metabolic process	8	1.48976	0.0890754	0.825981	TALDO1, ATF3, PYGL, PGD, GNMT, PGK1, FABP5, PDHB	372	140	13588	2.08725
GOTERM_BP_FAT	GO:0008610~lipid biosynthetic process	13	2.42086	0.0908079	0.829117	SCD1, FADS1, PRKAG1, RNPEPL1, GPAA1, ACLY, TECR, LASS2, FASN, H2-KE6, FABP5, DEGS1, B4GALNT1	372	285	13588	1.66614
GOTERM_BP_FAT	GO:0042168~heme metabolic process	3	0.558659	0.0937308	0.83615	ALAS1, HMOX1, HMBS	372	19	13588	5.7674
GOTERM_BP_FAT	GO:0031667~response to nutrient levels	7	1.30354	0.0949523	0.837319	SREBF1, ATG9B, ACADS, FOXA3, HMOX1, USF2, KLF4	372	115	13588	2.22338
GOTERM_BP_FAT	GO:0012501~programmed cell death	19	3.53818	0.0979644	0.844136	E2F2, FKBP8, GGCT, TBRG4, EIF5A, FADD, NFKBIL1, BCL2L11, SCRIB, DDIT4, RAD21, AKTIP, BBC3, MTCH1, MFSD10, GADD45B, PPP1R15A, DAP3, TFDP1	372	473	13588	1.46725

## Sheet: A-down_24-36
Category	Term	Count	%	PValue	Benjamini-Corrected PValue	Genes	List Total	Pop Hits	Pop Total	Fold Enrichment
GOTERM_BP_FAT	GO:0016055~Wnt receptor signaling pathway	3	4.10959	0.0635972	1	DKK2, KLHL12, FZD3	44	130	13588	7.12657
GOTERM_BP_FAT	GO:0045892~negative regulation of transcription, DNA-dependent	4	5.47945	0.0732842	1	HMX1, TBX3, RBBP7, LCOR	44	308	13588	4.01063
GOTERM_BP_FAT	GO:0051253~negative regulation of RNA metabolic process	4	5.47945	0.0744068		HMX1, TBX3, RBBP7, LCOR	44	310	13588	3.98475

## Sheet: B-up_0-3
Category	Term	Count	%	PValue	Benjamini-Corrected PValue	Genes	List Total	Pop Hits	Pop Total	Fold Enrichment
GOTERM_BP_FAT	GO:0050727~regulation of inflammatory response	9	2.5	9.43686e-06	0.0161562	ZFP36, TNFRSF1A, ADRB2, SBNO2, TNFRSF1B, IL20RB, C3, TGM2, LBP	253	57	13588	8.48013
GOTERM_BP_FAT	GO:0006954~inflammatory response	15	4.16667	7.94883e-05	0.066301	CXCL1, NFKBIZ, C3, SGMS1, ORM1, TNFRSF1A, SERPINA3N, TNFRSF1B, MYD88, IL20RB, SAA1, F2, LBP, ORM2, CD14	253	225	13588	3.5805
GOTERM_BP_FAT	GO:0032101~regulation of response to external stimulus	10	2.77778	0.000123852	0.068781	ZFP36, TNFRSF1A, ADRB2, SBNO2, TNFRSF1B, S1PR1, IL20RB, C3, TGM2, LBP	253	103	13588	5.21432
GOTERM_BP_FAT	GO:0051186~cofactor metabolic process	13	3.61111	0.000149631	0.0625302	ALDH1L1, NCF2, PGD, KMO, SLC11A2, GGT6, ALAS1, H6PD, HMOX1, FH1, FPGS, SCP2, GSTP2	253	182	13588	3.83625
GOTERM_BP_FAT	GO:0006953~acute-phase response	6	1.66667	0.000205603	0.0685209	ORM1, SERPINA3N, SAA1, F2, LBP, ORM2	253	30	13588	10.7415
GOTERM_BP_FAT	GO:0009725~response to hormone stimulus	12	3.33333	0.000255715	0.0709289	IRS2, SERPINA3N, MAT2A, REN2, HMOX1, SERPINA1E, RCAN1, PTPN1, MMP14, TAT, LPIN1, PIK3R1	253	165	13588	3.906
GOTERM_BP_FAT	GO:0009719~response to endogenous stimulus	12	3.33333	0.000646092	0.14731	IRS2, SERPINA3N, MAT2A, REN2, HMOX1, SERPINA1E, RCAN1, PTPN1, MMP14, TAT, LPIN1, PIK3R1	253	184	13588	3.50266
GOTERM_BP_FAT	GO:0009611~response to wounding	17	4.72222	0.000769669	0.153055	CXCL1, NFKBIZ, C3, NINJ1, SGMS1, ORM1, TNFRSF1A, SERPINA3N, TNFRSF1B, MYD88, IL20RB, FGB, SAA1, F2, LBP, ORM2, CD14	253	347	13588	2.6312
GOTERM_BP_FAT	GO:0006732~coenzyme metabolic process	10	2.77778	0.00138685	0.233677	GGT6, ALDH1L1, NCF2, H6PD, PGD, KMO, FH1, FPGS, GSTP2, SCP2	253	143	13588	3.75577
GOTERM_BP_FAT	GO:0051100~negative regulation of binding	5	1.38889	0.0021661	0.312211	SMO, ADRB2, HMOX1, CEBPG, MYC	253	30	13588	8.95125
GOTERM_BP_FAT	GO:0043487~regulation of RNA stability	4	1.11111	0.00295187	0.371149	ZFP36, TNFRSF1B, APOBEC1, MAPKAPK2	253	16	13588	13.4269
GOTERM_BP_FAT	GO:0048514~blood vessel morphogenesis	11	3.05556	0.00389498	0.429545	SMO, SHB, S1PR1, CERKL, HMOX1, TGM2, RHOB, ZC3H12A, MYH9, MMP14, FZD5	253	198	13588	2.98375
GOTERM_BP_FAT	GO:0002526~acute inflammatory response	7	1.94444	0.00390012	0.404783	ORM1, SERPINA3N, C3, SAA1, F2, LBP, ORM2	253	81	13588	4.64139
GOTERM_BP_FAT	GO:0006952~defense response	18	5	0.00427992	0.41068	CXCL1, NFKBIZ, IL1R1, C3, CEBPG, SGMS1, APOA4, ORM1, TNFRSF1A, SERPINA3N, TNFRSF1B, MYD88, IL20RB, SAA1, F2, LBP, ORM2, CD14	253	448	13588	2.15789
GOTERM_BP_FAT	GO:0042127~regulation of cell proliferation	20	5.55556	0.00549785	0.469728	EGFR, IRS2, APOBEC1, LRRC32, IFITM3, CLU, BCL2L1, ZBTB16, ATF5, SMO, ADRB2, S1PR1, MYD88, ADM, IL20RB, GRN, HMOX1, TGM2, MYC, KLF4	253	538	13588	1.99656
GOTERM_BP_FAT	GO:0032103~positive regulation of response to external stimulus	5	1.38889	0.00570825	0.460732	TNFRSF1A, S1PR1, C3, TGM2, LBP	253	39	13588	6.88558
GOTERM_BP_FAT	GO:0001568~blood vessel development	12	3.33333	0.00590942	0.452153	SMO, SHB, S1PR1, CERKL, SOCS3, HMOX1, TGM2, RHOB, ZC3H12A, MYH9, MMP14, FZD5	253	244	13588	2.64135
GOTERM_BP_FAT	GO:0010033~response to organic substance	19	5.27778	0.00625979	0.452357	EGR1, IRS2, MAT2A, REN2, RCAN1, SERPINA1E, BCL2L1, MMP14, TAT, LPIN1, EDEM1, SERPINA3N, MYD88, HMOX1, PTPN1, LBP, MYC, CD14, PIK3R1	253	505	13588	2.02068
GOTERM_BP_FAT	GO:0008219~cell death	19	5.27778	0.00646707	0.445335	1810011O10RIK, LITAF, CLU, EIF5A, GAN, SGMS1, BCL2L1, AHR, DDIT4, CIDEC, TNFRSF1A, SHB, TNFRSF1B, GADD45G, ZC3H12A, RHOB, DAP, MYC, NEK6	253	507	13588	2.01271
GOTERM_BP_FAT	GO:0051098~regulation of binding	7	1.94444	0.00652195	0.431462	SMO, ADRB2, MYD88, HMOX1, CEBPG, MYC, CALM2	253	90	13588	4.17725
GOTERM_BP_FAT	GO:0008610~lipid biosynthetic process	13	3.61111	0.00700691	0.43894	CYP51, SCD1, PTGES2, MVD, LPGAT1, PRKAB1, SGMS1, ACACB, PCX, ELOVL5, SCARB1, FABP5, DEGS1	253	285	13588	2.44982
GOTERM_BP_FAT	GO:0001944~vasculature development	12	3.33333	0.00704602	0.425784	SMO, SHB, S1PR1, CERKL, SOCS3, HMOX1, TGM2, RHOB, ZC3H12A, MYH9, MMP14, FZD5	253	250	13588	2.57796
GOTERM_BP_FAT	GO:0009628~response to abiotic stimulus	12	3.33333	0.00725216	0.42086	ANXA7, ADRB2, APOBEC1, MAT2A, USP1, HSPB8, ADAM2, ATP1A3, RCAN1, BCL2L1, MMP14, MYC	253	251	13588	2.56769
GOTERM_BP_FAT	GO:0050728~negative regulation of inflammatory response	4	1.11111	0.00747935	0.4172	ZFP36, ADRB2, TNFRSF1B, IL20RB	253	22	13588	9.765
GOTERM_BP_FAT	GO:0016265~death	19	5.27778	0.00818554	0.433034	1810011O10RIK, LITAF, CLU, EIF5A, GAN, SGMS1, BCL2L1, AHR, DDIT4, CIDEC, TNFRSF1A, SHB, TNFRSF1B, GADD45G, ZC3H12A, RHOB, DAP, MYC, NEK6	253	519	13588	1.96617
GOTERM_BP_FAT	GO:0006769~nicotinamide metabolic process	4	1.11111	0.00956628	0.47171	NCF2, H6PD, PGD, KMO	253	24	13588	8.95125
GOTERM_BP_FAT	GO:0046496~nicotinamide nucleotide metabolic process	4	1.11111	0.00956628	0.47171	NCF2, H6PD, PGD, KMO	253	24	13588	8.95125
GOTERM_BP_FAT	GO:0009820~alkaloid metabolic process	4	1.11111	0.00956628	0.47171	NCF2, H6PD, PGD, KMO	253	24	13588	8.95125
GOTERM_BP_FAT	GO:0050729~positive regulation of inflammatory response	4	1.11111	0.00956628	0.47171	TNFRSF1A, C3, TGM2, LBP	253	24	13588	8.95125
GOTERM_BP_FAT	GO:0048771~tissue remodeling	5	1.38889	0.0110341	0.508005	XDH, ADRB2, CERKL, TGM2, MMP14	253	47	13588	5.71356
GOTERM_BP_FAT	GO:0044092~negative regulation of molecular function	8	2.22222	0.0115234	0.510545	SMO, ADRB2, S1PR1, HMOX1, CEBPG, GADD45G, GADD45A, MYC	253	132	13588	3.255
GOTERM_BP_FAT	GO:0001525~angiogenesis	8	2.22222	0.0119775	0.511869	SHB, S1PR1, HMOX1, RHOB, ZC3H12A, MYH9, MMP14, FZD5	253	133	13588	3.23053
GOTERM_BP_FAT	GO:0042592~homeostatic process	20	5.55556	0.0124661	0.514088	XDH, TXNL1, PTGES2, ATOX1, CEBPG, ATP1A3, SLC11A2, SSTR5, ANXA7, ADRB2, GOT1, S1PR1, IL20RB, APOA5, MT2, TGM2, SCARB1, FH1, SLC4A4, QSOX1	253	584	13588	1.8393
GOTERM_BP_FAT	GO:0019362~pyridine nucleotide metabolic process	4	1.11111	0.0146664	0.560727	NCF2, H6PD, PGD, KMO	253	28	13588	7.6725
GOTERM_BP_FAT	GO:0001817~regulation of cytokine production	8	2.22222	0.0149771	0.55689	INHBB, MYD88, IL20RB, LRRC32, HMOX1, CEBPG, LBP, CD14	253	139	13588	3.09108
GOTERM_BP_FAT	GO:0046394~carboxylic acid biosynthetic process	8	2.22222	0.0160863	0.571816	SCD1, PTGES2, GOT1, MAT2A, ELOVL5, PRKAB1, ACACB, DEGS1	253	141	13588	3.04723
GOTERM_BP_FAT	GO:0016053~organic acid biosynthetic process	8	2.22222	0.0160863	0.571816	SCD1, PTGES2, GOT1, MAT2A, ELOVL5, PRKAB1, ACACB, DEGS1	253	141	13588	3.04723
GOTERM_BP_FAT	GO:0050873~brown fat cell differentiation	4	1.11111	0.0161389	0.562189	SCD1, ADRB2, MRAP, LRG1	253	29	13588	7.40793
GOTERM_BP_FAT	GO:0008284~positive regulation of cell proliferation	12	3.33333	0.0170748	0.572288	EGFR, SMO, ADRB2, IRS2, MYD88, S1PR1, ADM, GRN, CLU, TGM2, BCL2L1, MYC	253	284	13588	2.26933
GOTERM_BP_FAT	GO:0006633~fatty acid biosynthetic process	6	1.66667	0.0172473	0.565747	SCD1, PTGES2, ELOVL5, PRKAB1, ACACB, DEGS1	253	81	13588	3.97833
GOTERM_BP_FAT	GO:0031348~negative regulation of defense response	4	1.11111	0.0176914	0.565112	ZFP36, ADRB2, TNFRSF1B, IL20RB	253	30	13588	7.161
GOTERM_BP_FAT	GO:0051187~cofactor catabolic process	4	1.11111	0.0210377	0.619302	ALDH1L1, NCF2, HMOX1, FH1	253	32	13588	6.71344
GOTERM_BP_FAT	GO:0031349~positive regulation of defense response	5	1.38889	0.0211834	0.61232	TNFRSF1A, MYD88, C3, TGM2, LBP	253	57	13588	4.71119
GOTERM_BP_FAT	GO:0032870~cellular response to hormone stimulus	5	1.38889	0.0224311	0.624284	IRS2, REN2, PTPN1, LPIN1, PIK3R1	253	58	13588	4.62996
GOTERM_BP_FAT	GO:0043488~regulation of mRNA stability	3	0.833333	0.0233545	0.630214	ZFP36, APOBEC1, MAPKAPK2	253	13	13588	12.394
GOTERM_BP_FAT	GO:0055085~transmembrane transport	16	4.44444	0.0247548	0.643031	SLC39A14, SLC25A5, SLC45A1, EIF5A, MCART1, KCNV2, SLC11A2, SLC2A6, ATP6V0E, SLC25A25, SLC25A33, SLC2A1, SLC30A5, SCARB1, SLC22A5, ATP6V0A4	253	460	13588	1.86809
GOTERM_BP_FAT	GO:0008643~carbohydrate transport	5	1.38889	0.0250585	0.638919	SLC2A6, SLC45A1, SLC2A1, FABP5, G630090E17RIK	253	60	13588	4.47563
GOTERM_BP_FAT	GO:0045444~fat cell differentiation	5	1.38889	0.0264389	0.65044	SCD1, ADRB2, MRAP, LRG1, LPIN1	253	61	13588	4.40225
GOTERM_BP_FAT	GO:0006739~NADP metabolic process	3	0.833333	0.0269182	0.648875	NCF2, H6PD, PGD	253	14	13588	11.5088
GOTERM_BP_FAT	GO:0006915~apoptosis	16	4.44444	0.0270048	0.641992	1810011O10RIK, LITAF, EIF5A, SGMS1, BCL2L1, AHR, CIDEC, DDIT4, SHB, TNFRSF1A, GADD45G, ZC3H12A, RHOB, DAP, MYC, NEK6	253	465	13588	1.848
GOTERM_BP_FAT	GO:0001701~in utero embryonic development	11	3.05556	0.0274388	0.640028	EGFR, ACVR1B, CERKL, ADM, ELL, SOCS3, GRN, APBA3, BCL2L1, MYH9, TPM1	253	267	13588	2.21267
GOTERM_BP_FAT	GO:0032102~negative regulation of response to external stimulus	4	1.11111	0.0286976	0.649016	ZFP36, ADRB2, TNFRSF1B, IL20RB	253	36	13588	5.9675
GOTERM_BP_FAT	GO:0006955~immune response	16	4.44444	0.0296409	0.6535	CXCL1, IL1R1, SBNO2, C3, CEBPG, UNG, IL4RA, VTN, APOA4, TNFRSF1B, MYD88, IL20RB, CXCL14, GADD45G, LBP, CD14	253	471	13588	1.82446
GOTERM_BP_FAT	GO:0032760~positive regulation of tumor necrosis factor production	3	0.833333	0.0306854	0.658993	MYD88, LBP, CD14	253	15	13588	10.7415
GOTERM_BP_FAT	GO:0048661~positive regulation of smooth muscle cell proliferation	3	0.833333	0.0306854	0.658993	MYD88, S1PR1, TGM2	253	15	13588	10.7415
GOTERM_BP_FAT	GO:0046165~alcohol biosynthetic process	4	1.11111	0.0308135	0.653277	PCX, GOT1, PGD, FBP1	253	37	13588	5.80622
GOTERM_BP_FAT	GO:0030335~positive regulation of cell migration	4	1.11111	0.0308135	0.653277	IRS2, S1PR1, PTP4A1, PIK3R1	253	37	13588	5.80622
GOTERM_BP_FAT	GO:0012501~programmed cell death	16	4.44444	0.0308137	0.646145	1810011O10RIK, LITAF, EIF5A, SGMS1, BCL2L1, AHR, CIDEC, DDIT4, SHB, TNFRSF1A, GADD45G, ZC3H12A, RHOB, DAP, MYC, NEK6	253	473	13588	1.81674
GOTERM_BP_FAT	GO:0043434~response to peptide hormone stimulus	6	1.66667	0.0317444	0.650256	IRS2, SERPINA3N, SERPINA1E, PTPN1, LPIN1, PIK3R1	253	95	13588	3.39205
GOTERM_BP_FAT	GO:0048585~negative regulation of response to stimulus	5	1.38889	0.0324102	0.651141	ZFP36, ADRB2, TNFRSF1B, IL20RB, SOCS3	253	65	13588	4.13135
GOTERM_BP_FAT	GO:0006733~oxidoreduction coenzyme metabolic process	4	1.11111	0.0330092	0.65124	NCF2, H6PD, PGD, KMO	253	38	13588	5.65342
GOTERM_BP_FAT	GO:0045944~positive regulation of transcription from RNA polymerase II promoter	13	3.61111	0.0351969	0.66858	ABLIM1, EGR1, KLF13, CEBPD, TEAD1, AHR, SMO, TNFRSF1A, ADRB2, S1PR1, MYD88, MYC, KLF4	253	358	13588	1.95027
GOTERM_BP_FAT	GO:0043603~cellular amide metabolic process	4	1.11111	0.0352843	0.663022	NCF2, H6PD, PGD, KMO	253	39	13588	5.50846
GOTERM_BP_FAT	GO:0007049~cell cycle	19	5.27778	0.0356549	0.660547	MAD1L1, ANP32B, CCNT1, PIM3, 1700017B05RIK, MYH9, TACC1, AHR, TACC2, DUSP1, MAPK13, PTP4A1, FBXO31, SIK1, ING1, GADD45A, DST, CALM2, NEK6	253	611	13588	1.67012
GOTERM_BP_FAT	GO:0010557~positive regulation of macromolecule biosynthetic process	17	4.72222	0.0383916	0.681853	ABLIM1, EGR1, CEBPD, KLF13, CEBPG, TEAD1, EIF5A, AHR, SMO, TNFRSF1A, ADRB2, S1PR1, MYD88, MYC, ING1, KLF4, SERTAD2	253	530	13588	1.72269
GOTERM_BP_FAT	GO:0010628~positive regulation of gene expression	16	4.44444	0.0386419	0.678142	ABLIM1, EGR1, CEBPD, LRRC32, KLF13, TEAD1, AHR, SMO, TNFRSF1A, ADRB2, S1PR1, MYD88, MYC, ING1, KLF4, SERTAD2	253	488	13588	1.7609
GOTERM_BP_FAT	GO:0060713~labyrinthine layer morphogenesis	3	0.833333	0.0387956	0.673585	CERKL, ADM, SOCS3	253	17	13588	9.4778
GOTERM_BP_FAT	GO:0051272~positive regulation of cell motion	4	1.11111	0.0400706	0.679694	IRS2, S1PR1, PTP4A1, PIK3R1	253	41	13588	5.23976
GOTERM_BP_FAT	GO:0001775~cell activation	10	2.77778	0.040156	0.674647	EGR1, SHB, SBNO2, FGB, CEBPG, GADD45G, F2, LBP, MYH9, PIK3R1	253	246	13588	2.18323
GOTERM_BP_FAT	GO:0008203~cholesterol metabolic process	5	1.38889	0.0408984	0.675727	CYP51, SOAT2, MVD, SAA1, SCARB1	253	70	13588	3.83625
GOTERM_BP_FAT	GO:0048871~multicellular organismal homeostasis	5	1.38889	0.0427334	0.686418	XDH, SLC11A2, ADRB2, IL20RB, FH1	253	71	13588	3.78222
GOTERM_BP_FAT	GO:0002673~regulation of acute inflammatory response	3	0.833333	0.0431219	0.684229	IL20RB, C3, LBP	253	18	13588	8.95125
GOTERM_BP_FAT	GO:0051051~negative regulation of transport	5	1.38889	0.0446141	0.69141	INHBB, ADRB2, LRRC32, HMOX1, NEDD4L	253	72	13588	3.72969
GOTERM_BP_FAT	GO:0032869~cellular response to insulin stimulus	4	1.11111	0.0451678	0.690613	IRS2, PTPN1, LPIN1, PIK3R1	253	43	13588	4.99605
GOTERM_BP_FAT	GO:0016310~phosphorylation	21	5.83333	0.0455908	0.688777	EGFR, MVD, CCNT1, PIM3, MAPKAPK2, TRIB2, INSRR, ACVR1B, ATP6V0E, UQCR10, TRP53RK, SPEG, MAPK13, GADD45G, RIPK4, MAP3K14, ATP6V0A4, SIK1, NEK6, PIK3R1, NEK7	253	718	13588	1.57083
GOTERM_BP_FAT	GO:0045893~positive regulation of transcription, DNA-dependent	14	3.88889	0.0462595	0.688966	ABLIM1, EGR1, KLF13, CEBPD, TEAD1, AHR, SMO, TNFRSF1A, ADRB2, S1PR1, MYD88, MYC, KLF4, SERTAD2	253	416	13588	1.80746
GOTERM_BP_FAT	GO:0006575~cellular amino acid derivative metabolic process	7	1.94444	0.0475679	0.694186	GGT6, MAT2A, EIF5A, SLC22A5, PADI4, GSTP2, FABP5	253	141	13588	2.66633
GOTERM_BP_FAT	GO:0042168~heme metabolic process	3	0.833333	0.0476183	0.689505	SLC11A2, ALAS1, HMOX1	253	19	13588	8.48013
GOTERM_BP_FAT	GO:0040017~positive regulation of locomotion	4	1.11111	0.0478312	0.686155	IRS2, S1PR1, PTP4A1, PIK3R1	253	44	13588	4.8825
GOTERM_BP_FAT	GO:0051101~regulation of DNA binding	5	1.38889	0.0485129	0.686482	SMO, MYD88, HMOX1, CEBPG, CALM2	253	74	13588	3.62889
GOTERM_BP_FAT	GO:0045087~innate immune response	6	1.66667	0.0488813	0.684421	APOA4, IL1R1, MYD88, C3, CEBPG, LBP	253	107	13588	3.01164
GOTERM_BP_FAT	GO:0051254~positive regulation of RNA metabolic process	14	3.88889	0.0489161	0.679861	ABLIM1, EGR1, KLF13, CEBPD, TEAD1, AHR, SMO, TNFRSF1A, ADRB2, S1PR1, MYD88, MYC, KLF4, SERTAD2	253	419	13588	1.79452
GOTERM_BP_FAT	GO:0009314~response to radiation	7	1.94444	0.0503188	0.685664	APOBEC1, MAT2A, USP1, ADAM2, ATP1A3, BCL2L1, MYC	253	143	13588	2.62904
GOTERM_BP_FAT	GO:0031328~positive regulation of cellular biosynthetic process	17	4.72222	0.0520466	0.693566	ABLIM1, EGR1, CEBPD, KLF13, CEBPG, TEAD1, EIF5A, AHR, SMO, TNFRSF1A, ADRB2, S1PR1, MYD88, MYC, ING1, KLF4, SERTAD2	253	552	13588	1.65404
GOTERM_BP_FAT	GO:0043648~dicarboxylic acid metabolic process	3	0.833333	0.052277	0.690591	PCX, GOT1, FH1	253	20	13588	8.05613
GOTERM_BP_FAT	GO:0003044~regulation of systemic arterial blood pressure mediated by a chemical signal	3	0.833333	0.052277	0.690591	ADRB2, REN2, TPM1	253	20	13588	8.05613
GOTERM_BP_FAT	GO:0048660~regulation of smooth muscle cell proliferation	3	0.833333	0.052277	0.690591	MYD88, S1PR1, TGM2	253	20	13588	8.05613
GOTERM_BP_FAT	GO:0006796~phosphate metabolic process	24	6.66667	0.0523662	0.686657	EGFR, MVD, CCNT1, PIM3, MAPKAPK2, TRIB2, INSRR, ACVR1B, ATP6V0E, UQCR10, TRP53RK, DUSP1, SPEG, MAPK13, PTP4A1, GADD45G, RIPK4, PTPN1, MAP3K14, ATP6V0A4, SIK1, NEK6, PIK3R1, NEK7	253	866	13588	1.48843
GOTERM_BP_FAT	GO:0006793~phosphorus metabolic process	24	6.66667	0.0523662	0.686657	EGFR, MVD, CCNT1, PIM3, MAPKAPK2, TRIB2, INSRR, ACVR1B, ATP6V0E, UQCR10, TRP53RK, DUSP1, SPEG, MAPK13, PTP4A1, GADD45G, RIPK4, PTPN1, MAP3K14, ATP6V0A4, SIK1, NEK6, PIK3R1, NEK7	253	866	13588	1.48843
GOTERM_BP_FAT	GO:0045935~positive regulation of nucleobase, nucleoside, nucleotide and nucleic acid metabolic process	16	4.44444	0.0533146	0.688846	ABLIM1, EGR1, CEBPD, KLF13, CEBPG, TEAD1, AHR, SMO, TNFRSF1A, ADRB2, S1PR1, MYD88, MYC, ING1, KLF4, SERTAD2	253	510	13588	1.68494
GOTERM_BP_FAT	GO:0032091~negative regulation of protein binding	2	0.555556	0.0546158	0.693391	ADRB2, MYC	253	3	13588	35.805
GOTERM_BP_FAT	GO:0050779~RNA destabilization	2	0.555556	0.0546158	0.693391	ZFP36, TNFRSF1B	253	3	13588	35.805
GOTERM_BP_FAT	GO:0006106~fumarate metabolic process	2	0.555556	0.0546158	0.693391	GOT1, FH1	253	3	13588	35.805
GOTERM_BP_FAT	GO:0016125~sterol metabolic process	5	1.38889	0.0547028	0.689587	CYP51, SOAT2, MVD, SAA1, SCARB1	253	77	13588	3.4875
GOTERM_BP_FAT	GO:0006631~fatty acid metabolic process	8	2.22222	0.0557351	0.692222	SCD1, TNFRSF1A, PTGES2, ELOVL5, PRKAB1, ACACB, CRAT, DEGS1	253	184	13588	2.33511
GOTERM_BP_FAT	GO:0055080~cation homeostasis	8	2.22222	0.0557351	0.692222	SLC11A2, ANXA7, S1PR1, ATOX1, MT2, TGM2, ATP1A3, SLC4A4	253	184	13588	2.33511
GOTERM_BP_FAT	GO:0009891~positive regulation of biosynthetic process	17	4.72222	0.0557389	0.68795	ABLIM1, EGR1, CEBPD, KLF13, CEBPG, TEAD1, EIF5A, AHR, SMO, TNFRSF1A, ADRB2, S1PR1, MYD88, MYC, ING1, KLF4, SERTAD2	253	557	13588	1.63919
GOTERM_BP_FAT	GO:0045638~negative regulation of myeloid cell differentiation	3	0.833333	0.0570906	0.692661	ZFP36, ZBTB16, PIK3R1	253	21	13588	7.6725
GOTERM_BP_FAT	GO:0010608~posttranscriptional regulation of gene expression	7	1.94444	0.0576161	0.691891	ZFP36, SMO, TNFRSF1B, APOBEC1, EIF5A, NGDN, MAPKAPK2	253	148	13588	2.54022
GOTERM_BP_FAT	GO:0045941~positive regulation of transcription	15	4.16667	0.0598214	0.701765	ABLIM1, EGR1, CEBPD, KLF13, TEAD1, AHR, SMO, TNFRSF1A, ADRB2, S1PR1, MYD88, MYC, ING1, KLF4, SERTAD2	253	475	13588	1.69603
GOTERM_BP_FAT	GO:0001894~tissue homeostasis	4	1.11111	0.0653671	0.730453	XDH, ADRB2, IL20RB, FH1	253	50	13588	4.2966
GOTERM_BP_FAT	GO:0051173~positive regulation of nitrogen compound metabolic process	16	4.44444	0.0659821	0.729928	ABLIM1, EGR1, CEBPD, KLF13, CEBPG, TEAD1, AHR, SMO, TNFRSF1A, ADRB2, S1PR1, MYD88, MYC, ING1, KLF4, SERTAD2	253	526	13588	1.63369
GOTERM_BP_FAT	GO:0006730~one-carbon metabolic process	6	1.66667	0.0666338	0.729619	ALDH1L1, MAT2A, MAT1A, PRMT5, CTCFL, FPGS	253	117	13588	2.75423
GOTERM_BP_FAT	GO:0002281~macrophage activation during immune response	2	0.555556	0.0721526	0.754624	SBNO2, LBP	253	4	13588	26.8538
GOTERM_BP_FAT	GO:0050866~negative regulation of cell activation	4	1.11111	0.0750913	0.765132	IL20RB, LRRC32, HMOX1, IL4RA	253	53	13588	4.0534
GOTERM_BP_FAT	GO:0010038~response to metal ion	4	1.11111	0.0750913	0.765132	XDH, SLC11A2, MT2, TAT	253	53	13588	4.0534
GOTERM_BP_FAT	GO:0002695~negative regulation of leukocyte activation	4	1.11111	0.0750913	0.765132	IL20RB, LRRC32, HMOX1, IL4RA	253	53	13588	4.0534
GOTERM_BP_FAT	GO:0048878~chemical homeostasis	12	3.33333	0.0782317	0.775924	SLC11A2, SSTR5, ANXA7, S1PR1, GOT1, ATOX1, APOA5, MT2, TGM2, ATP1A3, SCARB1, SLC4A4	253	365	13588	1.76573
GOTERM_BP_FAT	GO:0006979~response to oxidative stress	5	1.38889	0.0782409	0.772409	ATOX1, HMOX1, CLU, MMP14, TAT	253	87	13588	3.08664
GOTERM_BP_FAT	GO:0010604~positive regulation of macromolecule metabolic process	18	5	0.0805412	0.779026	ABLIM1, EGR1, CEBPD, KLF13, LRRC32, CEBPG, TEAD1, EIF5A, AHR, SMO, TNFRSF1A, ADRB2, S1PR1, MYD88, ING1, MYC, KLF4, SERTAD2	253	633	13588	1.52723
GOTERM_BP_FAT	GO:0006916~anti-apoptosis	5	1.38889	0.080834	0.776828	ATF5, CLU, TPT1, BCL2L1, MYC	253	88	13588	3.05156
GOTERM_BP_FAT	GO:0007010~cytoskeleton organization	11	3.05556	0.0809084	0.77371	TCHH, ABLIM1, EPB4.1, GAN, MYH9, CAPZB, DST, GADD45A, LPIN1, TACC1, TACC2	253	326	13588	1.81222
GOTERM_BP_FAT	GO:0006814~sodium ion transport	6	1.66667	0.0831006	0.779655	SLC38A2, ATP1A3, SLC22A5, SLC10A2, SLC4A4, G630090E17RIK	253	125	13588	2.57796
GOTERM_BP_FAT	GO:0033013~tetrapyrrole metabolic process	3	0.833333	0.0832332	0.776854	SLC11A2, ALAS1, HMOX1	253	26	13588	6.19702
GOTERM_BP_FAT	GO:0006778~porphyrin metabolic process	3	0.833333	0.0832332	0.776854	SLC11A2, ALAS1, HMOX1	253	26	13588	6.19702
GOTERM_BP_FAT	GO:0043392~negative regulation of DNA binding	3	0.833333	0.0832332	0.776854	SMO, HMOX1, CEBPG	253	26	13588	6.19702
GOTERM_BP_FAT	GO:0007611~learning or memory	5	1.38889	0.0834692	0.77451	SLC11A2, EGR1, ADCY1, ADAM2, ATP1A3	253	89	13588	3.01728
GOTERM_BP_FAT	GO:0034637~cellular carbohydrate biosynthetic process	4	1.11111	0.0854139	0.779271	PCX, GOT1, PGD, FBP1	253	56	13588	3.83625
GOTERM_BP_FAT	GO:0051048~negative regulation of secretion	3	0.833333	0.0888299	0.789624	INHBB, LRRC32, HMOX1	253	27	13588	5.9675
GOTERM_BP_FAT	GO:0032680~regulation of tumor necrosis factor production	3	0.833333	0.0888299	0.789624	MYD88, LBP, CD14	253	27	13588	5.9675
GOTERM_BP_FAT	GO:0051188~cofactor biosynthetic process	5	1.38889	0.0888648	0.786582	SLC11A2, ALAS1, GGT6, KMO, FPGS	253	91	13588	2.95096
GOTERM_BP_FAT	GO:0051482~elevation of cytosolic calcium ion concentration during G-protein signaling, coupled to IP3 second messenger (phospholipase C activating)	2	0.555556	0.0893653	0.785367	S1PR1, TGM2	253	5	13588	21.483
GOTERM_BP_FAT	GO:0001823~mesonephros development	2	0.555556	0.0893653	0.785367	REN2, ZBTB16	253	5	13588	21.483
GOTERM_BP_FAT	GO:0043277~apoptotic cell clearance	2	0.555556	0.0893653	0.785367	LRP1, SCARB1	253	5	13588	21.483
GOTERM_BP_FAT	GO:0034368~protein-lipid complex remodeling	2	0.555556	0.0893653	0.785367	APOA5, SCARB1	253	5	13588	21.483
GOTERM_BP_FAT	GO:0034367~macromolecular complex remodeling	2	0.555556	0.0893653	0.785367	APOA5, SCARB1	253	5	13588	21.483
GOTERM_BP_FAT	GO:0022027~interkinetic nuclear migration	2	0.555556	0.0893653	0.785367	TACC1, TACC2	253	5	13588	21.483
GOTERM_BP_FAT	GO:0001935~endothelial cell proliferation	2	0.555556	0.0893653	0.785367	SCARB1, MMP14	253	5	13588	21.483
GOTERM_BP_FAT	GO:0034369~plasma lipoprotein particle remodeling	2	0.555556	0.0893653	0.785367	APOA5, SCARB1	253	5	13588	21.483
GOTERM_BP_FAT	GO:0070391~response to lipoteichoic acid	2	0.555556	0.0893653	0.785367	LBP, CD14	253	5	13588	21.483
GOTERM_BP_FAT	GO:0008283~cell proliferation	9	2.5	0.0894764	0.782661	SHB, ANXA7, IRS2, TNFRSF1B, SCARB1, BCL2L1, MMP14, TACC1, TACC2	253	247	13588	1.95695
GOTERM_BP_FAT	GO:0003073~regulation of systemic arterial blood pressure	3	0.833333	0.0945348	0.798486	ADRB2, REN2, TPM1	253	28	13588	5.75438
GOTERM_BP_FAT	GO:0008286~insulin receptor signaling pathway	3	0.833333	0.0945348	0.798486	IRS2, PTPN1, PIK3R1	253	28	13588	5.75438
GOTERM_BP_FAT	GO:0019318~hexose metabolic process	7	1.94444	0.0948135	0.796479	PCX, H6PD, PFKFB3, PGD, FBP1, MYC, FABP5	253	169	13588	2.22457
GOTERM_BP_FAT	GO:0032868~response to insulin stimulus	4	1.11111	0.0963029	0.7988	IRS2, PTPN1, LPIN1, PIK3R1	253	59	13588	3.64119
GOTERM_BP_FAT	GO:0030155~regulation of cell adhesion	5	1.38889	0.0972648	0.799229	S1PR1, TGM2, VTN, MMP14, PIK3R1	253	94	13588	2.85678

## Sheet: B-down_0-3
Category	Term	Count	%	PValue	Benjamini-Corrected PValue	Genes	List Total	Pop Hits	Pop Total	Fold Enrichment
GOTERM_BP_FAT	GO:0008202~steroid metabolic process	18	2.9654	6.67655e-06	0.0137057	SREBF1, SC5D, SLC37A4, APOC1, ESR1, NR3C1, FDFT1, ACBD3, NPC1, STARD5, G6PC, SERPINA6, CYP7A1, INSIG1, HSD17B6, PBX1, SRD5A1, CAT	408	161	13588	3.72342
GOTERM_BP_FAT	GO:0006641~triglyceride metabolic process	9	1.4827	8.76303e-06	0.00901574	MOGAT2, G6PC, APOB, DGAT2, ABHD5, SLC37A4, INSIG1, APOC1, CAT	408	36	13588	8.32598
GOTERM_BP_FAT	GO:0018904~organic ether metabolic process	10	1.64745	1.05712e-05	0.0072571	MOGAT2, G6PC, APOB, DGAT2, ABHD5, SLC37A4, INSIG1, APOC1, CYP1A2, CAT	408	48	13588	6.93832
GOTERM_BP_FAT	GO:0006639~acylglycerol metabolic process	9	1.4827	3.49513e-05	0.0178993	MOGAT2, G6PC, APOB, DGAT2, ABHD5, SLC37A4, INSIG1, APOC1, CAT	408	43	13588	6.97059
GOTERM_BP_FAT	GO:0006662~glycerol ether metabolic process	9	1.4827	4.93042e-05	0.0201765	MOGAT2, G6PC, APOB, DGAT2, ABHD5, SLC37A4, INSIG1, APOC1, CAT	408	45	13588	6.66078
GOTERM_BP_FAT	GO:0006638~neutral lipid metabolic process	9	1.4827	4.93042e-05	0.0201765	MOGAT2, G6PC, APOB, DGAT2, ABHD5, SLC37A4, INSIG1, APOC1, CAT	408	45	13588	6.66078
GOTERM_BP_FAT	GO:0006631~fatty acid metabolic process	17	2.80066	0.00013316	0.0448403	PPARA, SC5D, ACOXL, ABHD5, ACACA, FADS2, CYB5, FADS6, ACOT4, ACOT3, ELOVL1, FAR2, ACSL1, FAAH, GPAM, HPGD, ACSM5	408	184	13588	3.07699
GOTERM_BP_FAT	GO:0008610~lipid biosynthetic process	22	3.62438	0.000139363	0.0403193	MOGAT2, SC5D, SGMS2, ABHD5, ST8SIA1, ACACA, FADS2, FADS6, LPCAT3, PDSS1, FDFT1, ELOVL1, FAR2, ACBD3, STARD5, DGAT2, INSIG1, PEMT, LCLAT1, PBX1, SRD5A1, GPAM	408	285	13588	2.57083
GOTERM_BP_FAT	GO:0042593~glucose homeostasis	8	1.31796	0.000162869	0.0412114	ASPSCR1, G6PC, GCK, SLC37A4, ADRA1B, MLXIPL, PDE3B, FOXO3	408	40	13588	6.66078
GOTERM_BP_FAT	GO:0033500~carbohydrate homeostasis	8	1.31796	0.000162869	0.0412114	ASPSCR1, G6PC, GCK, SLC37A4, ADRA1B, MLXIPL, PDE3B, FOXO3	408	40	13588	6.66078
GOTERM_BP_FAT	GO:0055114~oxidation reduction	38	6.2603	0.000257955	0.0575302	SEPX1, SC5D, CYP2F2, KCNAB1, ADH7, PRDX1, FDFT1, NDUFS7, MTHFD1, FAR2, P4HA1, CYP7A1, HSD17B6, ALDH1A7, SRD5A1, CAT, BDH1, SARDH, WWOX, GLRX, ACOXL, IDO2, FADS2, MOSC1, CYP1A2, CYB5, FADS6, PPARGC1A, DHRS3, PRDX6, SQLE, CYP2D26, DIO1, ZADH2, CYP8B1, HPGD, BCO2, PRODH	408	672	13588	1.88326
GOTERM_BP_FAT	GO:0042445~hormone metabolic process	11	1.81219	0.000351469	0.0700844	RBP4, ECE1, CPE, SERPINA6, ESR1, ADH7, ALDH1A7, SRD5A1, DIO1, NR3C1, BCO2	408	90	13588	4.07048
GOTERM_BP_FAT	GO:0043467~regulation of generation of precursor metabolites and energy	5	0.823723	0.000457418	0.0823807	CISD1, GCK, ADRA1B, MLXIPL, DYRK2	408	13	13588	12.8092
GOTERM_BP_FAT	GO:0010565~regulation of cellular ketone metabolic process	6	0.988468	0.000506644	0.0835901	SREBF1, PPARA, GCK, INSIG1, MLXIPL, NR3C1	408	23	13588	8.68798
GOTERM_BP_FAT	GO:0031327~negative regulation of cellular biosynthetic process	27	4.44811	0.000548123	0.0834838	EIF2C1, THRB, CBX4, ZEB1, SOX6, MXI1, CITED2, EIF4EBP2, INSIG1, PER2, BCL6, BHLHE40, NRG1, CEBPA, DNMT3A, JARID2, NODAL, MLXIPL, TLE4, PHF12, FOXP1, GCK, BPTF, HIPK2, SCMH1, TBL1X, SUDS3	408	430	13588	2.09118
GOTERM_BP_FAT	GO:0010906~regulation of glucose metabolic process	5	0.823723	0.00062532	0.0882167	GCK, ADRA1B, MLXIPL, DYRK2, NR3C1	408	14	13588	11.8943
GOTERM_BP_FAT	GO:0009890~negative regulation of biosynthetic process	27	4.44811	0.000636081	0.0839458	EIF2C1, THRB, CBX4, ZEB1, SOX6, MXI1, CITED2, EIF4EBP2, INSIG1, PER2, BCL6, BHLHE40, NRG1, CEBPA, DNMT3A, JARID2, NODAL, MLXIPL, TLE4, PHF12, FOXP1, GCK, BPTF, HIPK2, SCMH1, TBL1X, SUDS3	408	434	13588	2.0719
GOTERM_BP_FAT	GO:0006109~regulation of carbohydrate metabolic process	5	0.823723	0.000832669	0.102027	GCK, ADRA1B, MLXIPL, DYRK2, NR3C1	408	15	13588	11.1013
GOTERM_BP_FAT	GO:0010675~regulation of cellular carbohydrate metabolic process	5	0.823723	0.000832669	0.102027	GCK, ADRA1B, MLXIPL, DYRK2, NR3C1	408	15	13588	11.1013
GOTERM_BP_FAT	GO:0034754~cellular hormone metabolic process	8	1.31796	0.000858511	0.0991618	RBP4, SERPINA6, ESR1, ADH7, ALDH1A7, SRD5A1, NR3C1, BCO2	408	52	13588	5.12368
GOTERM_BP_FAT	GO:0006644~phospholipid metabolic process	14	2.30643	0.00125005	0.133798	SGMS2, ABHD5, GPLD1, LPCAT3, PTEN, NAPEPLD, PLCG1, PLA2G12A, LYST, ASPG, PEMT, LCLAT1, GPAM, PPAP2B	408	163	13588	2.86046
GOTERM_BP_FAT	GO:0015758~glucose transport	6	0.988468	0.00130838	0.132753	SLC2A9, G6PC, SLC37A4, SORT1, NRG1, GH	408	28	13588	7.13655
GOTERM_BP_FAT	GO:0019216~regulation of lipid metabolic process	8	1.31796	0.00165474	0.157312	SREBF1, PPARA, APOB, THRB, ABHD5, INSIG1, MLXIPL, NR3C1	408	58	13588	4.59364
GOTERM_BP_FAT	GO:0046486~glycerolipid metabolic process	12	1.97694	0.00170798	0.154864	MOGAT2, G6PC, APOB, DGAT2, ABHD5, SLC37A4, INSIG1, APOC1, PEMT, GPLD1, CAT, PTEN	408	129	13588	3.09804
GOTERM_BP_FAT	GO:0010558~negative regulation of macromolecule biosynthetic process	25	4.11862	0.00179215	0.155096	EIF2C1, THRB, CBX4, ZEB1, SOX6, MXI1, CITED2, EIF4EBP2, PER2, BCL6, BHLHE40, NRG1, CEBPA, DNMT3A, JARID2, NODAL, MLXIPL, TLE4, PHF12, FOXP1, BPTF, HIPK2, SCMH1, TBL1X, SUDS3	408	418	13588	1.99186
GOTERM_BP_FAT	GO:0008645~hexose transport	6	0.988468	0.00180624	0.149961	SLC2A9, G6PC, SLC37A4, SORT1, NRG1, GH	408	30	13588	6.66078
GOTERM_BP_FAT	GO:0016481~negative regulation of transcription	23	3.78913	0.00191664	0.152301	CEBPA, DNMT3A, THRB, JARID2, NODAL, MLXIPL, CBX4, TLE4, PHF12, SOX6, ZEB1, MXI1, FOXP1, CITED2, BPTF, HIPK2, PER2, BCL6, BHLHE40, TBL1X, NRG1, SCMH1, SUDS3	408	372	13588	2.05911
GOTERM_BP_FAT	GO:0010907~positive regulation of glucose metabolic process	4	0.658979	0.00195851	0.149634	GCK, ADRA1B, MLXIPL, DYRK2	408	9	13588	14.8017
GOTERM_BP_FAT	GO:0045934~negative regulation of nucleobase, nucleoside, nucleotide and nucleic acid metabolic process	24	3.95387	0.00198777	0.146308	CEBPA, DNMT3A, THRB, JARID2, NODAL, MLXIPL, CBX4, NDFIP1, TLE4, PHF12, SOX6, ZEB1, MXI1, FOXP1, CITED2, BPTF, HIPK2, PER2, BCL6, BHLHE40, TBL1X, NRG1, SCMH1, SUDS3	408	397	13588	2.01334
GOTERM_BP_FAT	GO:0015749~monosaccharide transport	6	0.988468	0.00210142	0.148746	SLC2A9, G6PC, SLC37A4, SORT1, NRG1, GH	408	31	13588	6.44592
GOTERM_BP_FAT	GO:0051172~negative regulation of nitrogen compound metabolic process	24	3.95387	0.00225346	0.153412	CEBPA, DNMT3A, THRB, JARID2, NODAL, MLXIPL, CBX4, NDFIP1, TLE4, PHF12, SOX6, ZEB1, MXI1, FOXP1, CITED2, BPTF, HIPK2, PER2, BCL6, BHLHE40, TBL1X, NRG1, SCMH1, SUDS3	408	401	13588	1.99325
GOTERM_BP_FAT	GO:0016042~lipid catabolic process	12	1.97694	0.00231141	0.152054	APOB, NAPEPLD, ACOXL, PLCG1, ENPP2, PRDX6, FAAH, CYP7A1, PLA2G12A, ASPG, APOC2, PPT1	408	134	13588	2.98244
GOTERM_BP_FAT	GO:0045892~negative regulation of transcription, DNA-dependent	20	3.29489	0.00239405	0.152232	CEBPA, DNMT3A, THRB, JARID2, NODAL, MLXIPL, CBX4, TLE4, PHF12, ZEB1, SOX6, MXI1, FOXP1, CITED2, BPTF, HIPK2, PER2, BCL6, BHLHE40, TBL1X	408	308	13588	2.16259
GOTERM_BP_FAT	GO:0019637~organophosphate metabolic process	14	2.30643	0.00248339	0.152778	SGMS2, ABHD5, GPLD1, LPCAT3, PTEN, NAPEPLD, PLCG1, PLA2G12A, LYST, ASPG, PEMT, LCLAT1, GPAM, PPAP2B	408	176	13588	2.64918
GOTERM_BP_FAT	GO:0051253~negative regulation of RNA metabolic process	20	3.29489	0.00258238	0.153818	CEBPA, DNMT3A, THRB, JARID2, NODAL, MLXIPL, CBX4, TLE4, PHF12, ZEB1, SOX6, MXI1, FOXP1, CITED2, BPTF, HIPK2, PER2, BCL6, BHLHE40, TBL1X	408	310	13588	2.14864
GOTERM_BP_FAT	GO:0010605~negative regulation of macromolecule metabolic process	28	4.61285	0.00273536	0.157657	EIF2C1, THRB, CBX4, ZEB1, SOX6, MXI1, CITED2, EIF4EBP2, PER2, RAB23, BCL6, BHLHE40, NRG1, CEBPA, DNMT3A, JARID2, NODAL, NDFIP1, MLXIPL, TLE4, PHF12, FOXP1, BPTF, HIPK2, ADRA1B, SCMH1, TBL1X, SUDS3	408	506	13588	1.8429
GOTERM_BP_FAT	GO:0045913~positive regulation of carbohydrate metabolic process	4	0.658979	0.00273602	0.15343	GCK, ADRA1B, MLXIPL, DYRK2	408	10	13588	13.3216
GOTERM_BP_FAT	GO:0010676~positive regulation of cellular carbohydrate metabolic process	4	0.658979	0.00273602	0.15343	GCK, ADRA1B, MLXIPL, DYRK2	408	10	13588	13.3216
GOTERM_BP_FAT	GO:0046395~carboxylic acid catabolic process	9	1.4827	0.00288517	0.156872	MTHFD1, AMDHD1, BCAT2, ACOXL, FAAH, IDO2, SARDH, AFMID, PRODH	408	81	13588	3.70044
GOTERM_BP_FAT	GO:0016054~organic acid catabolic process	9	1.4827	0.00288517	0.156872	MTHFD1, AMDHD1, BCAT2, ACOXL, FAAH, IDO2, SARDH, AFMID, PRODH	408	81	13588	3.70044
GOTERM_BP_FAT	GO:0010629~negative regulation of gene expression	24	3.95387	0.00301243	0.159051	CEBPA, DNMT3A, EIF2C1, THRB, JARID2, NODAL, MLXIPL, CBX4, TLE4, PHF12, SOX6, ZEB1, MXI1, FOXP1, CITED2, BPTF, HIPK2, PER2, BCL6, BHLHE40, TBL1X, NRG1, SCMH1, SUDS3	408	410	13588	1.9495
GOTERM_BP_FAT	GO:0055088~lipid homeostasis	6	0.988468	0.00319766	0.16383	NPC1, G6PC, APOB, LYST, SLC37A4, ACACA	408	34	13588	5.87716
GOTERM_BP_FAT	GO:0048878~chemical homeostasis	22	3.62438	0.00332722	0.165802	ASPSCR1, ACO1, SLC37A4, MLXIPL, ACACA, PDE3B, PPT1, FOXO3, CACNB4, KDR, NPC1, APOB, G6PC, GCK, LYST, ADRA1B, ADRA1A, NRG1, CUTC, GPR12, DLG1, ATP7B	408	365	13588	2.00736
GOTERM_BP_FAT	GO:0016053~organic acid biosynthetic process	12	1.97694	0.00343547	0.166726	ELOVL1, MTHFD1, FAR2, SC5D, BCAT2, ABHD5, ACACA, FADS2, LGSN, FADS6, AGXT, PRODH	408	141	13588	2.83438
GOTERM_BP_FAT	GO:0046394~carboxylic acid biosynthetic process	12	1.97694	0.00343547	0.166726	ELOVL1, MTHFD1, FAR2, SC5D, BCAT2, ABHD5, ACACA, FADS2, LGSN, FADS6, AGXT, PRODH	408	141	13588	2.83438
GOTERM_BP_FAT	GO:0009719~response to endogenous stimulus	14	2.30643	0.00364669	0.172037	RBP4, ESR1, PDE3B, AGXT, SLC1A2, CAPN10, EIF4EBP2, SERPINA1A, SERPINA1D, ADRA1B, ADRA1A, SORT1, TBL1X, GH	408	184	13588	2.53399
GOTERM_BP_FAT	GO:0046890~regulation of lipid biosynthetic process	5	0.823723	0.00378055	0.173831	SREBF1, APOB, INSIG1, MLXIPL, NR3C1	408	22	13588	7.56907
GOTERM_BP_FAT	GO:0000122~negative regulation of transcription from RNA polymerase II promoter	16	2.63591	0.00413035	0.184287	CEBPA, DNMT3A, THRB, JARID2, NODAL, CBX4, MLXIPL, TLE4, ZEB1, SOX6, MXI1, FOXP1, BPTF, HIPK2, PER2, BCL6	408	231	13588	2.30677
GOTERM_BP_FAT	GO:0010817~regulation of hormone levels	11	1.81219	0.00511797	0.218587	RBP4, ECE1, CPE, SERPINA6, ESR1, ADH7, ALDH1A7, SRD5A1, DIO1, NR3C1, BCO2	408	128	13588	2.86206
GOTERM_BP_FAT	GO:0042592~homeostatic process	30	4.94234	0.005305	0.221104	VPS54, SLC37A4, PDE3B, PPT1, CACNB4, FOXO3, SOX6, PRDX1, APOB, PDILT, BCL6, NRG1, CUTC, GLRX, DLG1, ASPSCR1, ACO1, ACACA, MLXIPL, KDR, DCLRE1C, NPC1, G6PC, GCK, PRDX6, LYST, ADRA1B, ADRA1A, GPR12, ATP7B	408	584	13588	1.71082
GOTERM_BP_FAT	GO:0009063~cellular amino acid catabolic process	7	1.15321	0.00533836	0.217973	MTHFD1, AMDHD1, BCAT2, IDO2, SARDH, AFMID, PRODH	408	54	13588	4.31718
GOTERM_BP_FAT	GO:0035024~negative regulation of Rho protein signal transduction	3	0.494234	0.00842856	0.316372	ADRA1B, ADRA1A, BCL6	408	5	13588	19.9824
GOTERM_BP_FAT	GO:0021535~cell migration in hindbrain	3	0.494234	0.00842856	0.316372	DAB1, PLXNA2, CTNNA2	408	5	13588	19.9824
GOTERM_BP_FAT	GO:0001889~liver development	6	0.988468	0.00888357	0.324589	CEBPA, JARID2, NODAL, ONECUT2, MKL2, CITED2	408	43	13588	4.64706
GOTERM_BP_FAT	GO:0007368~determination of left/right symmetry	6	0.988468	0.00888357	0.324589	STIL, NODAL, FTO, DNAHC11, PCSK6, CITED2	408	43	13588	4.64706
GOTERM_BP_FAT	GO:0008643~carbohydrate transport	7	1.15321	0.00891139	0.319867	SLC2A9, G6PC, SLC2A5, SLC37A4, SORT1, NRG1, GH	408	60	13588	3.88546
GOTERM_BP_FAT	GO:0009799~determination of symmetry	6	0.988468	0.00978221	0.339449	STIL, NODAL, FTO, DNAHC11, PCSK6, CITED2	408	44	13588	4.54144
GOTERM_BP_FAT	GO:0009855~determination of bilateral symmetry	6	0.988468	0.00978221	0.339449	STIL, NODAL, FTO, DNAHC11, PCSK6, CITED2	408	44	13588	4.54144
GOTERM_BP_FAT	GO:0007242~intracellular signaling cascade	41	6.75453	0.0101763	0.344819	LPAR3, AKAP13, NR3C1, ARHGAP5, EIF4EBP2, DAB1, TIAM2, RAB23, GKAP1, TLK1, BCL6, DYRK2, ADCY10, CSK, NRG1, RAPGEF1, ARHGDIA, MAP2K6, KLF9, MUC20, SOCS5, DAPK2, PPARGC1B, DAPK1, SH3BP5, TNS3, DOK3, ADCY9, GCK, PLCG1, RAB36, HIPK2, CAR8, GRLF1, ADRA1A, CHN2, GUCY1B2, RGS7, FAF1, LRRK1, BCAR3	408	915	13588	1.49231
GOTERM_BP_FAT	GO:0010648~negative regulation of cell communication	13	2.14168	0.010291	0.342459	ONECUT2, SOCS5, RGS16, PTEN, THY1, NPC1, ADRA1B, RGS7, ADRA1A, RGS8, BCL6, WWOX, TOB1	408	186	13588	2.32769
GOTERM_BP_FAT	GO:0006357~regulation of transcription from RNA polymerase II promoter	30	4.94234	0.0108707	0.352395	PPARA, ZFP395, THRB, ONECUT2, CBX4, SOX6, ZEB1, FOXO3, MXI1, TCF7L2, CITED2, PER2, BCL6, MKL2, SREBF1, CEBPA, DNMT3A, KAT2B, JARID2, NODAL, MLXIPL, TLE4, BRIP1, PPARGC1A, FOXP1, PPARGC1B, BPTF, HIPK2, PBX1, TBL1X	408	616	13588	1.62194
GOTERM_BP_FAT	GO:0009725~response to hormone stimulus	12	1.97694	0.010914	0.348179	RBP4, EIF4EBP2, CAPN10, SERPINA1A, SERPINA1D, ESR1, ADRA1A, PDE3B, SORT1, TBL1X, AGXT, GH	408	165	13588	2.4221
GOTERM_BP_FAT	GO:0050810~regulation of steroid biosynthetic process	4	0.658979	0.0111737	0.349563	SREBF1, APOB, INSIG1, NR3C1	408	16	13588	8.32598
GOTERM_BP_FAT	GO:0032881~regulation of polysaccharide metabolic process	3	0.494234	0.0123935	0.374172	GCK, ADRA1B, DYRK2	408	6	13588	16.652
GOTERM_BP_FAT	GO:0043288~apocarotenoid metabolic process	3	0.494234	0.0123935	0.374172	RBP4, ALDH1A7, BCO2	408	6	13588	16.652
GOTERM_BP_FAT	GO:0042574~retinal metabolic process	3	0.494234	0.0123935	0.374172	RBP4, ALDH1A7, BCO2	408	6	13588	16.652
GOTERM_BP_FAT	GO:0009310~amine catabolic process	7	1.15321	0.0129868	0.382756	MTHFD1, AMDHD1, BCAT2, IDO2, SARDH, AFMID, PRODH	408	65	13588	3.58658
GOTERM_BP_FAT	GO:0006081~cellular aldehyde metabolic process	4	0.658979	0.0132713	0.383984	RBP4, ALDH1A7, AGXT, BCO2	408	17	13588	7.83622
GOTERM_BP_FAT	GO:0009968~negative regulation of signal transduction	12	1.97694	0.0139808	0.394538	ONECUT2, ADRA1B, ADRA1A, RGS7, BCL6, RGS8, SOCS5, RGS16, PTEN, WWOX, TOB1, THY1	408	171	13588	2.33712
GOTERM_BP_FAT	GO:0048593~camera-type eye morphogenesis	6	0.988468	0.0139997	0.389777	RBP4, CRYAA, PVRL3, ZEB1, EPHB1, THY1	408	48	13588	4.16299
GOTERM_BP_FAT	GO:0006720~isoprenoid metabolic process	6	0.988468	0.0152184	0.410397	RBP4, ADH7, ALDH1A7, PDSS1, BCO2, FDFT1	408	49	13588	4.07803
GOTERM_BP_FAT	GO:0050863~regulation of T cell activation	9	1.4827	0.0157903	0.416861	CD83, NDFIP1, BCL6, ZEB1, SOCS5, CD1D1, CSK, DLG1, THY1	408	108	13588	2.77533
GOTERM_BP_FAT	GO:0002697~regulation of immune effector process	8	1.31796	0.0163233	0.422293	DDX58, RBP4, CADM1, NDFIP1, BCL6, CD1D1, KLRB1B, FOXP1	408	88	13588	3.02763
GOTERM_BP_FAT	GO:0009894~regulation of catabolic process	6	0.988468	0.0165061	0.420781	NPC1, ABHD5, ADRA1B, NDFIP1, MLXIPL, FAF1	408	50	13588	3.99647
GOTERM_BP_FAT	GO:0019748~secondary metabolic process	7	1.15321	0.017072	0.426577	RBP4, TALDO1, GCK, ADH7, ALDH1A7, CYP1A2, BCO2	408	69	13588	3.37866
GOTERM_BP_FAT	GO:0019217~regulation of fatty acid metabolic process	4	0.658979	0.0180956	0.440499	SREBF1, PPARA, INSIG1, MLXIPL	408	19	13588	7.01135
GOTERM_BP_FAT	GO:0001944~vasculature development	15	2.47117	0.0185988	0.444543	ZFAND5, VHL, NODAL, PTEN, CITED2, THY1, KDR, APOB, ITGA7, CCBE1, ADRA1B, MKL2, PPAP2B, RAPGEF1, TNFAIP2	408	250	13588	1.99824
GOTERM_BP_FAT	GO:0006694~steroid biosynthetic process	7	1.15321	0.0194134	0.453821	ACBD3, SC5D, STARD5, INSIG1, PBX1, SRD5A1, FDFT1	408	71	13588	3.28349
GOTERM_BP_FAT	GO:0043434~response to peptide hormone stimulus	8	1.31796	0.0238336	0.519652	RBP4, EIF4EBP2, CAPN10, SERPINA1A, SERPINA1D, PDE3B, SORT1, GH	408	95	13588	2.80454
GOTERM_BP_FAT	GO:0042981~regulation of apoptosis	26	4.28336	0.0268306	0.557242	STIL, MGMT, PPT1, NR3C1, FOXO3, PTEN, PRDX1, CITED2, BOK, BCL6, DYRK2, BMF, WWOX, BCL2L14, MUC20, ESR1, PIM1, CTNNA1, DAPK2, DAPK1, CAPN10, HIPK2, BIK, FAF1, APIP, CAMK1D	408	553	13588	1.56583
GOTERM_BP_FAT	GO:0046637~regulation of alpha-beta T cell differentiation	4	0.658979	0.0269248	0.553337	CD83, BCL6, SOCS5, CD1D1	408	22	13588	6.05526
GOTERM_BP_FAT	GO:0019218~regulation of steroid metabolic process	4	0.658979	0.0269248	0.553337	SREBF1, APOB, INSIG1, NR3C1	408	22	13588	6.05526
GOTERM_BP_FAT	GO:0048511~rhythmic process	8	1.31796	0.0276804	0.558339	HLF, NR1D1, PER2, ESR1, FOXO3, OPN4, KDR, ATP7B	408	98	13588	2.71869
GOTERM_BP_FAT	GO:0015980~energy derivation by oxidation of organic compounds	8	1.31796	0.0276804	0.558339	G6PC, ACO1, KL, SLC37A4, GYS2, CYP1A2, CAT, PPARGC1A	408	98	13588	2.71869
GOTERM_BP_FAT	GO:0016125~sterol metabolic process	7	1.15321	0.027725	0.553886	SREBF1, SC5D, CYP7A1, INSIG1, APOC1, CAT, FDFT1	408	77	13588	3.02763
GOTERM_BP_FAT	GO:0042304~regulation of fatty acid biosynthetic process	3	0.494234	0.0280273	0.55288	SREBF1, INSIG1, MLXIPL	408	9	13588	11.1013
GOTERM_BP_FAT	GO:0002828~regulation of T-helper 2 type immune response	3	0.494234	0.0280273	0.55288	NDFIP1, BCL6, SOCS5	408	9	13588	11.1013
GOTERM_BP_FAT	GO:0012502~induction of programmed cell death	11	1.81219	0.0288669	0.55877	BOK, HIPK2, MUC20, BIK, FOXO3, DYRK2, DAPK2, PTEN, PRDX1, WWOX, DAPK1	408	167	13588	2.19367
GOTERM_BP_FAT	GO:0006917~induction of apoptosis	11	1.81219	0.0288669	0.55877	BOK, HIPK2, MUC20, BIK, FOXO3, DYRK2, DAPK2, PTEN, PRDX1, WWOX, DAPK1	408	167	13588	2.19367
GOTERM_BP_FAT	GO:0046942~carboxylic acid transport	8	1.31796	0.029051	0.556256	SLC38A4, SLC38A3, TRPC4, SLC1A2, SLC6A6, CACNB4, AGXT, SLC1A1	408	99	13588	2.69123
GOTERM_BP_FAT	GO:0051249~regulation of lymphocyte activation	10	1.64745	0.0292699	0.554227	CD83, LYST, NDFIP1, BCL6, ZEB1, SOCS5, CD1D1, CSK, DLG1, THY1	408	144	13588	2.31277
GOTERM_BP_FAT	GO:0045619~regulation of lymphocyte differentiation	6	0.988468	0.0294505	0.55177	CD83, NDFIP1, BCL6, ZEB1, SOCS5, CD1D1	408	58	13588	3.44523
GOTERM_BP_FAT	GO:0009896~positive regulation of catabolic process	4	0.658979	0.0302931	0.557439	ABHD5, ADRA1B, NDFIP1, MLXIPL	408	23	13588	5.79199
GOTERM_BP_FAT	GO:0031329~regulation of cellular catabolic process	4	0.658979	0.0302931	0.557439	NPC1, ABHD5, ADRA1B, MLXIPL	408	23	13588	5.79199
GOTERM_BP_FAT	GO:0010464~regulation of mesenchymal cell proliferation	4	0.658979	0.0302931	0.557439	ARHGAP5, ZEB1, FOXP1, KDR	408	23	13588	5.79199
GOTERM_BP_FAT	GO:0051241~negative regulation of multicellular organismal process	8	1.31796	0.0304669	0.554941	ATXN2, RBP4, CD83, KLKB1, SLC37A4, NDFIP1, ADRA1A, BCL6	408	100	13588	2.66431
GOTERM_BP_FAT	GO:0015849~organic acid transport	8	1.31796	0.0304669	0.554941	SLC38A4, SLC38A3, TRPC4, SLC1A2, SLC6A6, CACNB4, AGXT, SLC1A1	408	100	13588	2.66431
GOTERM_BP_FAT	GO:0043067~regulation of programmed cell death	26	4.28336	0.0305316	0.551189	STIL, MGMT, PPT1, NR3C1, FOXO3, PTEN, PRDX1, CITED2, BOK, BCL6, DYRK2, BMF, WWOX, BCL2L14, MUC20, ESR1, PIM1, CTNNA1, DAPK2, DAPK1, CAPN10, HIPK2, BIK, FAF1, APIP, CAMK1D	408	560	13588	1.54625
GOTERM_BP_FAT	GO:0040007~growth	12	1.97694	0.0309491	0.551683	STIL, G6PC, SLC1A2, VPS54, ADRA1B, ESR1, ADRA1A, FOXO3, SEPP1, SOCS5, PTEN, BMP6	408	193	13588	2.07071
GOTERM_BP_FAT	GO:0032868~response to insulin stimulus	6	0.988468	0.031416	0.552742	RBP4, EIF4EBP2, CAPN10, PDE3B, SORT1, GH	408	59	13588	3.38684
GOTERM_BP_FAT	GO:0010941~regulation of cell death	26	4.28336	0.0327644	0.563785	STIL, MGMT, PPT1, NR3C1, FOXO3, PTEN, PRDX1, CITED2, BOK, BCL6, DYRK2, BMF, WWOX, BCL2L14, MUC20, ESR1, PIM1, CTNNA1, DAPK2, DAPK1, CAPN10, HIPK2, BIK, FAF1, APIP, CAMK1D	408	563	13588	1.53801
GOTERM_BP_FAT	GO:0042127~regulation of cell proliferation	25	4.11862	0.0337302	0.570152	RBP4, ST8SIA1, ZEB1, PTEN, ARHGAP5, BCL6, CSK, FANCA, DLG1, CEBPA, KLB, JARID2, NODAL, NDFIP1, ESR1, LIFR, CTNNA1, FOXP1, KDR, TNS3, SERPINF1, HIPK2, ID4, PBX1, SMARCA2	408	538	13588	1.54758
GOTERM_BP_FAT	GO:0001818~negative regulation of cytokine production	4	0.658979	0.0338722	0.567411	CD83, SLC37A4, NDFIP1, BCL6	408	24	13588	5.55065
GOTERM_BP_FAT	GO:0043255~regulation of carbohydrate biosynthetic process	3	0.494234	0.0343501	0.568338	GCK, DYRK2, NR3C1	408	10	13588	9.99118
GOTERM_BP_FAT	GO:0009967~positive regulation of signal transduction	11	1.81219	0.0343533	0.564184	ECE1, KLB, KL, HIPK2, ADRA1A, LPAR3, CAT, DGKI, CTNNA1, NRG1, CITED2	408	172	13588	2.1299
GOTERM_BP_FAT	GO:0007167~enzyme linked receptor protein signaling pathway	15	2.47117	0.0361131	0.578503	ZFAND5, KLB, KL, NODAL, MUC20, SOCS5, PTEN, EPHB1, KDR, EIF4EBP2, HIPK2, RAPGEF1, HPGD, BMP6, TOB1	408	273	13588	1.82989
GOTERM_BP_FAT	GO:0043065~positive regulation of apoptosis	14	2.30643	0.0364876	0.578215	MUC20, FOXO3, NR3C1, DAPK2, PRDX1, PTEN, DAPK1, CAPN10, BOK, HIPK2, BIK, FAF1, DYRK2, WWOX	408	248	13588	1.88006
GOTERM_BP_FAT	GO:0002637~regulation of immunoglobulin production	4	0.658979	0.0376605	0.585898	RBP4, NDFIP1, BCL6, FOXP1	408	25	13588	5.32863
GOTERM_BP_FAT	GO:0043068~positive regulation of programmed cell death	14	2.30643	0.038305	0.588182	MUC20, FOXO3, NR3C1, DAPK2, PRDX1, PTEN, DAPK1, CAPN10, BOK, HIPK2, BIK, FAF1, DYRK2, WWOX	408	250	13588	1.86502
GOTERM_BP_FAT	GO:0010942~positive regulation of cell death	14	2.30643	0.0404115	0.60418	MUC20, FOXO3, NR3C1, DAPK2, PRDX1, PTEN, DAPK1, CAPN10, BOK, HIPK2, BIK, FAF1, DYRK2, WWOX	408	252	13588	1.85022
GOTERM_BP_FAT	GO:0043370~regulation of CD4-positive, alpha beta T cell differentiation	3	0.494234	0.0411659	0.607143	CD83, BCL6, SOCS5	408	11	13588	9.08289
GOTERM_BP_FAT	GO:0030325~adrenal gland development	3	0.494234	0.0411659	0.607143	PBX1, NR3C1, CITED2	408	11	13588	9.08289
GOTERM_BP_FAT	GO:0032673~regulation of interleukin-4 production	3	0.494234	0.0411659	0.607143	CD83, NDFIP1, CD1D1	408	11	13588	9.08289
GOTERM_BP_FAT	GO:0006835~dicarboxylic acid transport	3	0.494234	0.0411659	0.607143	SLC1A2, AGXT, SLC1A1	408	11	13588	9.08289
GOTERM_BP_FAT	GO:0045944~positive regulation of transcription from RNA polymerase II promoter	18	2.9654	0.0416525	0.607624	SREBF1, CEBPA, PPARA, KAT2B, THRB, NODAL, ONECUT2, MLXIPL, FOXO3, ZEB1, SOX6, PPARGC1A, TCF7L2, PPARGC1B, CITED2, HIPK2, PBX1, MKL2	408	358	13588	1.6745
GOTERM_BP_FAT	GO:0055092~sterol homeostasis	4	0.658979	0.0416555	0.603768	NPC1, G6PC, APOB, SLC37A4	408	26	13588	5.12368
GOTERM_BP_FAT	GO:0006776~vitamin A metabolic process	4	0.658979	0.0416555	0.603768	RBP4, ADH7, ALDH1A7, BCO2	408	26	13588	5.12368
GOTERM_BP_FAT	GO:0042632~cholesterol homeostasis	4	0.658979	0.0416555	0.603768	NPC1, G6PC, APOB, SLC37A4	408	26	13588	5.12368
GOTERM_BP_FAT	GO:0007548~sex differentiation	9	1.4827	0.0416957	0.600289	RBP4, ESR1, BIK, PBX1, SRD5A1, FOXO3, FANCA, TCF7L2, KDR	408	130	13588	2.30566
GOTERM_BP_FAT	GO:0043010~camera-type eye development	9	1.4827	0.0416957	0.600289	RBP4, CRYGS, CRYAA, PVRL3, GRLF1, ZEB1, EPHB1, DLG1, THY1	408	130	13588	2.30566
GOTERM_BP_FAT	GO:0008652~cellular amino acid biosynthetic process	5	0.823723	0.0420176	0.599371	MTHFD1, BCAT2, LGSN, AGXT, PRODH	408	44	13588	3.78454
GOTERM_BP_FAT	GO:0002694~regulation of leukocyte activation	10	1.64745	0.0421862	0.597112	CD83, LYST, NDFIP1, BCL6, ZEB1, SOCS5, CD1D1, CSK, DLG1, THY1	408	154	13588	2.16259
GOTERM_BP_FAT	GO:0048585~negative regulation of response to stimulus	6	0.988468	0.0449173	0.616929	PPARA, NPC1, NDFIP1, BCL6, KLRB1B, CTNNA2	408	65	13588	3.07421
GOTERM_BP_FAT	GO:0050865~regulation of cell activation	10	1.64745	0.0451667	0.615317	CD83, LYST, NDFIP1, BCL6, ZEB1, SOCS5, CD1D1, CSK, DLG1, THY1	408	156	13588	2.13487
GOTERM_BP_FAT	GO:0051674~localization of cell	15	2.47117	0.0471967	0.628213	ZFAND5, VHL, PLXNA2, NODAL, SLC37A4, DNAHC11, PTEN, CTNNA2, KDR, TNS3, APOB, DAB1, LYST, CSF3R, NRG1	408	284	13588	1.75901
GOTERM_BP_FAT	GO:0048870~cell motility	15	2.47117	0.0471967	0.628213	ZFAND5, VHL, PLXNA2, NODAL, SLC37A4, DNAHC11, PTEN, CTNNA2, KDR, TNS3, APOB, DAB1, LYST, CSF3R, NRG1	408	284	13588	1.75901
GOTERM_BP_FAT	GO:0051186~cofactor metabolic process	11	1.81219	0.0474291	0.62644	MTHFD1, TALDO1, GCK, ACO1, HEBP1, GSTT1, PPT1, CYP1A2, PDSS1, ACOT4, ACOT3	408	182	13588	2.01287
GOTERM_BP_FAT	GO:0045596~negative regulation of cell differentiation	11	1.81219	0.0474291	0.62644	NODAL, INSIG1, BCL6, PBX1, ID4, ZEB1, SOCS5, CTNNA1, TCF7L2, TOB1, THY1	408	182	13588	2.01287
GOTERM_BP_FAT	GO:0046700~heterocycle catabolic process	5	0.823723	0.048241	0.62925	MTHFD1, AMDHD1, IDO2, AFMID, PRODH	408	46	13588	3.61999
GOTERM_BP_FAT	GO:0006544~glycine metabolic process	3	0.494234	0.0484396	0.627246	SHMT2, SARDH, AGXT	408	12	13588	8.32598
GOTERM_BP_FAT	GO:0016101~diterpenoid metabolic process	4	0.658979	0.0502543	0.637603	RBP4, ADH7, ALDH1A7, BCO2	408	28	13588	4.7577
GOTERM_BP_FAT	GO:0001523~retinoid metabolic process	4	0.658979	0.0502543	0.637603	RBP4, ADH7, ALDH1A7, BCO2	408	28	13588	4.7577
GOTERM_BP_FAT	GO:0006974~response to DNA damage stimulus	15	2.47117	0.0512957	0.641861	MGMT, BRIP1, FOXO3, RAD52, EEPD1, RAD51, DCLRE1C, DCLRE1A, DCLRE1B, RAD51L1, HIPK2, TLK1, DYRK2, FANCA, NHEJ1	408	287	13588	1.74062
GOTERM_BP_FAT	GO:0043410~positive regulation of MAPKKK cascade	5	0.823723	0.0515333	0.640153	KLB, KL, HIPK2, ADRA1A, LPAR3	408	47	13588	3.54297
GOTERM_BP_FAT	GO:0060537~muscle tissue development	9	1.4827	0.0519445	0.639733	ZFAND5, RBP4, UTRN, CACNB4, MKL2, NRG1, PTEN, FOXP1, DLG1	408	136	13588	2.20394
GOTERM_BP_FAT	GO:0006721~terpenoid metabolic process	4	0.658979	0.0548514	0.656916	RBP4, ADH7, ALDH1A7, BCO2	408	29	13588	4.59364
GOTERM_BP_FAT	GO:0045580~regulation of T cell differentiation	5	0.823723	0.0549454	0.65421	CD83, BCL6, ZEB1, SOCS5, CD1D1	408	48	13588	3.46916
GOTERM_BP_FAT	GO:0046580~negative regulation of Ras protein signal transduction	3	0.494234	0.0561379	0.658998	ADRA1B, ADRA1A, BCL6	408	13	13588	7.68552
GOTERM_BP_FAT	GO:0051058~negative regulation of small GTPase mediated signal transduction	3	0.494234	0.0561379	0.658998	ADRA1B, ADRA1A, BCL6	408	13	13588	7.68552
GOTERM_BP_FAT	GO:0048745~smooth muscle tissue development	3	0.494234	0.0561379	0.658998	ZFAND5, FOXP1, DLG1	408	13	13588	7.68552
GOTERM_BP_FAT	GO:0031331~positive regulation of cellular catabolic process	3	0.494234	0.0561379	0.658998	ABHD5, ADRA1B, MLXIPL	408	13	13588	7.68552
GOTERM_BP_FAT	GO:0015837~amine transport	7	1.15321	0.0578063	0.666767	SLC38A4, SLC38A3, TRPC4, SLC1A2, SLC6A6, PARK2, CACNB4	408	92	13588	2.53399
GOTERM_BP_FAT	GO:0016477~cell migration	13	2.14168	0.0578363	0.663707	ZFAND5, PLXNA2, VHL, NODAL, SLC37A4, PTEN, CTNNA2, KDR, TNS3, DAB1, LYST, CSF3R, NRG1	408	240	13588	1.80396
GOTERM_BP_FAT	GO:0010647~positive regulation of cell communication	11	1.81219	0.0583539	0.663843	ECE1, KLB, KL, HIPK2, ADRA1A, LPAR3, CAT, DGKI, CTNNA1, NRG1, CITED2	408	189	13588	1.93832
GOTERM_BP_FAT	GO:0008203~cholesterol metabolic process	6	0.988468	0.0584502	0.661264	SREBF1, CYP7A1, INSIG1, APOC1, CAT, FDFT1	408	70	13588	2.85462
GOTERM_BP_FAT	GO:0050808~synapse organization	5	0.823723	0.0584767	0.658259	CADM1, ANK3, UTRN, CACNB4, NRG1	408	49	13588	3.39836
GOTERM_BP_FAT	GO:0021942~radial glia guided migration of Purkinje cell	2	0.329489	0.0590108	0.658549	DAB1, CTNNA2	408	2	13588	33.3039
GOTERM_BP_FAT	GO:0051156~glucose 6-phosphate metabolic process	2	0.329489	0.0590108	0.658549	G6PC, GCK	408	2	13588	33.3039
GOTERM_BP_FAT	GO:0033504~floor plate development	2	0.329489	0.0590108	0.658549	STIL, NODAL	408	2	13588	33.3039
GOTERM_BP_FAT	GO:0002700~regulation of production of molecular mediator of immune response	4	0.658979	0.059642	0.659451	RBP4, NDFIP1, BCL6, FOXP1	408	30	13588	4.44052
GOTERM_BP_FAT	GO:0017015~regulation of transforming growth factor beta receptor signaling pathway	4	0.658979	0.059642	0.659451	ONECUT2, HIPK2, ZEB1, CITED2	408	30	13588	4.44052
GOTERM_BP_FAT	GO:0006865~amino acid transport	6	0.988468	0.0614076	0.667391	SLC38A4, SLC38A3, TRPC4, SLC1A2, SLC6A6, CACNB4	408	71	13588	2.81442
GOTERM_BP_FAT	GO:0016311~dephosphorylation	9	1.4827	0.0616271	0.665676	G6PC, PTPRD, PTPRF, PTPRG, PTP4A2, PPM1A, PTEN, MTMR7, DUSP6	408	141	13588	2.12578
GOTERM_BP_FAT	GO:0033554~cellular response to stress	19	3.13015	0.0620954	0.6655	SREBF1, MGMT, ST8SIA1, BRIP1, FOXO3, RAD52, PRDX1, EEPD1, RAD51, DCLRE1C, DCLRE1A, DCLRE1B, RAD51L1, HIPK2, TLK1, CAT, DYRK2, FANCA, NHEJ1	408	404	13588	1.56627
GOTERM_BP_FAT	GO:0030155~regulation of cell adhesion	7	1.15321	0.0628799	0.667235	SMOC2, DAB1, ONECUT2, BCL6, FAF1, PTEN, CITED2	408	94	13588	2.48008
GOTERM_BP_FAT	GO:0001568~blood vessel development	13	2.14168	0.0637964	0.669721	VHL, PTEN, CITED2, THY1, KDR, APOB, ITGA7, CCBE1, ADRA1B, MKL2, RAPGEF1, TNFAIP2, PPAP2B	408	244	13588	1.77439
GOTERM_BP_FAT	GO:0001952~regulation of cell-matrix adhesion	3	0.494234	0.0642289	0.669313	ONECUT2, BCL6, PTEN	408	14	13588	7.13655
GOTERM_BP_FAT	GO:0048592~eye morphogenesis	6	0.988468	0.067572	0.685545	RBP4, CRYAA, PVRL3, ZEB1, EPHB1, THY1	408	73	13588	2.73731
GOTERM_BP_FAT	GO:0045449~regulation of transcription	79	13.0148	0.0710342	0.701432	HLF, PPARA, EIF2C1, THRB, CBX4, FOXO3, ZEB1, MXI1, 1700020N01RIK, CITED2, CREG1, ATOH8, MKL2, CAT, NRG1, SSBP3, KHDRBS3, RREB1, NODAL, ZFP467, MLXIPL, CDK8, ESR1, TLE4, BANP, HDAC11, NR0B2, HMGA2, PPARGC1A, PCGF1, FOXN3, PPARGC1B, ZFP652, BPTF, FAM120B, PARP14, HIPK2, PAF1, SMARCA2, SUDS3, ZFP710, ZFP395, TSHZ2, ONECUT2, TRIB3, SOX6, NR3C1, TCF7L2, MYCL1, NR1D1, PER2, BCL6, BHLHE40, TCF23, SREBF1…	408	2227	13588	1.18141
GOTERM_BP_FAT	GO:0035249~synaptic transmission, glutamatergic	3	0.494234	0.0726822	0.707163	GRM8, PARK2, CACNB4	408	15	13588	6.66078
GOTERM_BP_FAT	GO:0060042~retina morphogenesis in camera-type eye	3	0.494234	0.0726822	0.707163	RBP4, PVRL3, THY1	408	15	13588	6.66078
GOTERM_BP_FAT	GO:0048514~blood vessel morphogenesis	11	1.81219	0.0737532	0.709806	APOB, VHL, CCBE1, ITGA7, ADRA1B, MKL2, PTEN, TNFAIP2, KDR, THY1, CITED2	408	198	13588	1.85022
GOTERM_BP_FAT	GO:0008285~negative regulation of cell proliferation	12	1.97694	0.0744406	0.710474	CEBPA, RBP4, SERPINF1, JARID2, NDFIP1, BCL6, ZEB1, CTNNA1, CSK, PTEN, SMARCA2, DLG1	408	224	13588	1.78414
GOTERM_BP_FAT	GO:0002683~negative regulation of immune system process	6	0.988468	0.0774385	0.722396	NDFIP1, BCL6, SOCS5, KLRB1B, DLG1, THY1	408	76	13588	2.62926
GOTERM_BP_FAT	GO:0006775~fat-soluble vitamin metabolic process	4	0.658979	0.0806508	0.734679	RBP4, ADH7, ALDH1A7, BCO2	408	34	13588	3.91811
GOTERM_BP_FAT	GO:0046634~regulation of alpha-beta T cell activation	4	0.658979	0.0806508	0.734679	CD83, BCL6, SOCS5, CD1D1	408	34	13588	3.91811
GOTERM_BP_FAT	GO:0002088~lens development in camera-type eye	4	0.658979	0.0806508	0.734679	CRYGS, CRYAA, PVRL3, DLG1	408	34	13588	3.91811
GOTERM_BP_FAT	GO:0007517~muscle organ development	10	1.64745	0.0827815	0.741561	ZFAND5, RBP4, UTRN, CACNB4, MKL2, NRG1, PTEN, FOXP1, DLG1, TCF23	408	176	13588	1.89227
GOTERM_BP_FAT	GO:0008284~positive regulation of cell proliferation	14	2.30643	0.0859535	0.752603	KLB, NODAL, ESR1, ST8SIA1, LIFR, FOXP1, KDR, TNS3, ARHGAP5, HIPK2, BCL6, ID4, PBX1, DLG1	408	284	13588	1.64174
GOTERM_BP_FAT	GO:0006928~cell motion	17	2.80066	0.0861273	0.750743	ZFAND5, VHL, PLXNA2, NODAL, SLC37A4, DNAHC11, PTEN, EPHB1, CTNNA2, KDR, TNS3, APOB, DAB1, ANK3, LYST, CSF3R, NRG1	408	367	13588	1.54269
GOTERM_BP_FAT	GO:0044242~cellular lipid catabolic process	5	0.823723	0.0864463	0.749507	APOB, NAPEPLD, ACOXL, PLCG1, FAAH	408	56	13588	2.97356
GOTERM_BP_FAT	GO:0045629~negative regulation of T-helper 2 cell differentiation	2	0.329489	0.0872003	0.7501	BCL6, SOCS5	408	3	13588	22.2026
GOTERM_BP_FAT	GO:0015712~hexose phosphate transport	2	0.329489	0.0872003	0.7501	G6PC, SLC37A4	408	3	13588	22.2026
GOTERM_BP_FAT	GO:0003057~regulation of the force of heart contraction by chemical signal	2	0.329489	0.0872003	0.7501	ADRA1B, ADRA1A	408	3	13588	22.2026
GOTERM_BP_FAT	GO:0015760~glucose-6-phosphate transport	2	0.329489	0.0872003	0.7501	G6PC, SLC37A4	408	3	13588	22.2026
GOTERM_BP_FAT	GO:0001997~positive regulation of the force of heart contraction by epinephrine-norepinephrine	2	0.329489	0.0872003	0.7501	ADRA1B, ADRA1A	408	3	13588	22.2026
GOTERM_BP_FAT	GO:0048294~negative regulation of isotype switching to IgE isotypes	2	0.329489	0.0872003	0.7501	NDFIP1, BCL6	408	3	13588	22.2026
GOTERM_BP_FAT	GO:0045829~negative regulation of isotype switching	2	0.329489	0.0872003	0.7501	NDFIP1, BCL6	408	3	13588	22.2026
GOTERM_BP_FAT	GO:0003099~positive regulation of the force of heart contraction by chemical signal	2	0.329489	0.0872003	0.7501	ADRA1B, ADRA1A	408	3	13588	22.2026
GOTERM_BP_FAT	GO:0021932~hindbrain radial glia guided cell migration	2	0.329489	0.0872003	0.7501	DAB1, CTNNA2	408	3	13588	22.2026
GOTERM_BP_FAT	GO:0046058~cAMP metabolic process	3	0.494234	0.0905622	0.761228	ADCY9, CACNB4, ADCY10	408	17	13588	5.87716
GOTERM_BP_FAT	GO:0042573~retinoic acid metabolic process	3	0.494234	0.0905622	0.761228	ADH7, ALDH1A7, BCO2	408	17	13588	5.87716
GOTERM_BP_FAT	GO:0046545~development of primary female sexual characteristics	5	0.823723	0.0908902	0.760037	RBP4, ESR1, FOXO3, FANCA, KDR	408	57	13588	2.9214
GOTERM_BP_FAT	GO:0048738~cardiac muscle tissue development	5	0.823723	0.0908902	0.760037	RBP4, MKL2, NRG1, PTEN, FOXP1	408	57	13588	2.9214
GOTERM_BP_FAT	GO:0002684~positive regulation of immune system process	11	1.81219	0.0913256	0.759281	CD83, CADM1, PLCG1, LYST, BCL6, CFI, CACNB4, SOCS5, CD1D1, FOXP1, THY1	408	206	13588	1.77836
GOTERM_BP_FAT	GO:0009187~cyclic nucleotide metabolic process	4	0.658979	0.092196	0.760236	ADCY9, GUCY1B2, CACNB4, ADCY10	408	36	13588	3.70044
GOTERM_BP_FAT	GO:0032102~negative regulation of response to external stimulus	4	0.658979	0.092196	0.760236	PPARA, NPC1, NDFIP1, CTNNA2	408	36	13588	3.70044
GOTERM_BP_FAT	GO:0006091~generation of precursor metabolites and energy	13	2.14168	0.0939678	0.764634	KL, ACO1, SLC37A4, FADS2, CYP1A2, CYB5, PPARGC1A, NDUFS7, G6PC, GCK, GYS2, CAT, GLRX	408	261	13588	1.65882
GOTERM_BP_FAT	GO:0006633~fatty acid biosynthetic process	6	0.988468	0.0955015	0.768016	ELOVL1, FAR2, SC5D, ACACA, FADS2, FADS6	408	81	13588	2.46696
GOTERM_BP_FAT	GO:0048608~reproductive structure development	8	1.31796	0.09574	0.766525	RBP4, ESR1, BIK, FOXO3, FANCA, PTEN, DLG1, KDR	408	130	13588	2.04947
GOTERM_BP_FAT	GO:0006112~energy reserve metabolic process	4	0.658979	0.0982107	0.773238	G6PC, KL, SLC37A4, GYS2	408	37	13588	3.60042
GOTERM_BP_FAT	GO:0016049~cell growth	4	0.658979	0.0982107	0.773238	ADRA1B, ESR1, ADRA1A, SOCS5	408	37	13588	3.60042
GOTERM_BP_FAT	GO:0055085~transmembrane transport	20	3.29489	0.098396	0.771575	SLC12A6, RBP4, SLC2A9, TRPC4, SPNS2, AQP9, KCNAB1, SLC22A23, SLC24A6, SLC19A2, SLC25A21, SLC2A5, SLC16A7, MFSD7C, SLC17A1, SLC25A10, SERP2, NUP35, ABCC6, SLC22A1	408	460	13588	1.448
GOTERM_BP_FAT	GO:0001654~eye development	9	1.4827	0.099771	0.774186	RBP4, CRYGS, CRYAA, PVRL3, GRLF1, ZEB1, EPHB1, DLG1, THY1	408	157	13588	1.90914
GOTERM_BP_FAT	GO:0035295~tube development	13	2.14168	0.0999996	0.772702	CEBPA, STIL, RBP4, NODAL, ESR1, NR3C1, CYP1A2, FOXP1, KDR, TNS3, GRLF1, PBX1, DLG1	408	264	13588	1.63997

## Sheet: B-up_3-24
Category	Term	Count	%	PValue	Benjamini-Corrected PValue	Genes	List Total	Pop Hits	Pop Total	Fold Enrichment
GOTERM_MF_FAT	GO:0019904~protein domain specific binding	15	2.91262	0.000630948	0.315673	KHDRBS3, CADM1, LYN, NDFIP1, ESRRG, PTEN, DOCK4, CTR9, FMN1, ATXN2, DAB1, DOCK1, FAF1, ADAM12, LRP2	355	192	13288	2.9243
GOTERM_MF_FAT	GO:0019842~vitamin binding	11	2.13592	0.00146149	0.35564	AADAT, RBP4, BSPRY, AGXT2L1, P4HA1, ACACA, AGXT2, MOSC1, AGXT, SLC19A2, PCCA	355	121	13288	3.40282
GOTERM_MF_FAT	GO:0005416~cation:amino acid symporter activity	4	0.776699	0.00195711	0.324606	SLC36A1, SLC1A2, SLC6A13, SLC1A1	355	10	13288	14.9724
GOTERM_MF_FAT	GO:0005343~organic acid:sodium symporter activity	5	0.970874	0.00247681	0.311061	SLC1A2, SLC6A13, SLC6A6, SLC10A2, SLC1A1	355	22	13288	8.50704
GOTERM_MF_FAT	GO:0015293~symporter activity	11	2.13592	0.00278889	0.285157	SLC12A6, SLC36A1, SLC2A9, SLC38A4, SLC1A2, SLC16A7, SLC17A1, SLC6A13, SLC6A6, SLC10A2, SLC1A1	355	132	13288	3.11925
GOTERM_MF_FAT	GO:0015294~solute:cation symporter activity	8	1.5534	0.00323689	0.277295	SLC12A6, SLC36A1, SLC2A9, SLC1A2, SLC6A13, SLC6A6, SLC10A2, SLC1A1	355	73	13288	4.10203
GOTERM_MF_FAT	GO:0005496~steroid binding	6	1.16505	0.00444687	0.317946	STARD5, BSPRY, SERPINA6, ESR1, ESRRG, NR3C1	355	41	13288	5.47771
GOTERM_MF_FAT	GO:0030695~GTPase regulator activity	19	3.68932	0.00818238	0.460564	AKAP13, DOCK8, DGKI, ARHGAP26, USP6NL, DOCK4, PLCE1, ARHGAP5, DOCK1, TIAM2, SIPA1L1, RIN2, GRLF1, RGS7, CHN2, ERC1, FGD6, GM5820, BCAR3, SRGAP2	355	361	13288	1.97005
GOTERM_MF_FAT	GO:0060589~nucleoside-triphosphatase regulator activity	19	3.68932	0.0093463	0.46584	AKAP13, DOCK8, DGKI, ARHGAP26, USP6NL, DOCK4, PLCE1, ARHGAP5, DOCK1, TIAM2, SIPA1L1, RIN2, GRLF1, RGS7, CHN2, ERC1, FGD6, GM5820, BCAR3, SRGAP2	355	367	13288	1.93784
GOTERM_MF_FAT	GO:0003707~steroid hormone receptor activity	6	1.16505	0.00952152	0.437287	NR1D1, THRB, ESR1, ESRRG, NR0B2, NR3C1	355	49	13288	4.58339
GOTERM_MF_FAT	GO:0008081~phosphoric diester hydrolase activity	7	1.35922	0.012243	0.489847	PLCE1, PLCB4, PLCG1, ENPP2, PDE4B, GPLD1, PDE3B	355	72	13288	3.63912
GOTERM_MF_FAT	GO:0005283~sodium:amino acid symporter activity	3	0.582524	0.0136015	0.496354	SLC1A2, SLC6A13, SLC1A1	355	7	13288	16.0419
GOTERM_MF_FAT	GO:0004879~ligand-dependent nuclear receptor activity	6	1.16505	0.0164135	0.534714	NR1D1, THRB, ESR1, ESRRG, NR0B2, NR3C1	355	56	13288	4.01046
GOTERM_MF_FAT	GO:0016887~ATPase activity	15	2.91262	0.0186246	0.553835	DHX8, ATP1B4, BRIP1, DNAHC11, ATP13A3, ABCA6, ATP6V1F, RAD51, DDX58, ATP6V1C1, RAD51L1, ATP8B1, CHD6, ABCC6, RHOBTB3	355	281	13288	1.9981
GOTERM_MF_FAT	GO:0017124~SH3 domain binding	7	1.35922	0.0186818	0.53027	FMN1, KHDRBS3, DOCK1, LYN, LRP2, ADAM12, DOCK4	355	79	13288	3.31667
GOTERM_MF_FAT	GO:0003779~actin binding	15	2.91262	0.0224311	0.573508	DIXDC1, MYO6, SHROOM3, MYO1B, ABLIM3, CALD1, UTRN, SYNPO2, CTNNA1, FMN1, ANG, SVIL, SNTB2, MKL2, DIAP3	355	288	13288	1.94953
GOTERM_MF_FAT	GO:0008483~transaminase activity	4	0.776699	0.0250705	0.59246	AADAT, AGXT2L1, AGXT2, AGXT	355	24	13288	6.2385
GOTERM_MF_FAT	GO:0031406~carboxylic acid binding	7	1.35922	0.0257841	0.581968	ACBD3, P4HA1, ACACA, FABP1, AGXT, SLC19A2, PCCA	355	85	13288	3.08255
GOTERM_MF_FAT	GO:0005275~amine transmembrane transporter activity	6	1.16505	0.0260119	0.565556	SLC36A1, SLC44A1, SLC1A2, SLC6A13, SLC6A6, SLC1A1	355	63	13288	3.56486
GOTERM_MF_FAT	GO:0008092~cytoskeletal protein binding	19	3.68932	0.0287094	0.583281	DIXDC1, MYO6, SHROOM3, MYO1B, ABLIM3, CALD1, UTRN, KTN1, SYNPO2, CTNNA1, FMN1, ATG4C, ANG, SVIL, TRIM32, SNTB2, EPB4.1L4B, MKL2, DIAP3	355	414	13288	1.71785
GOTERM_MF_FAT	GO:0005516~calmodulin binding	8	1.5534	0.0326891	0.613709	MYO6, MYO1B, CALD1, ESRRG, SNTB2, DAPK2, DAPK1, CAMK1D	355	114	13288	2.62674
GOTERM_MF_FAT	GO:0015370~solute:sodium symporter activity	5	0.970874	0.0335961	0.606847	SLC1A2, SLC6A13, SLC6A6, SLC10A2, SLC1A1	355	46	13288	4.06859
GOTERM_MF_FAT	GO:0033293~monocarboxylic acid binding	4	0.776699	0.0341812	0.596988	ACBD3, ACACA, FABP1, PCCA	355	27	13288	5.54533
GOTERM_MF_FAT	GO:0042623~ATPase activity, coupled	12	2.3301	0.0367497	0.608437	DDX58, DHX8, ATP6V1C1, RAD51L1, ATP1B4, ATP8B1, BRIP1, ATP13A3, CHD6, ABCC6, RAD51, ATP6V1F	355	223	13288	2.01422
GOTERM_MF_FAT	GO:0015179~L-amino acid transmembrane transporter activity	4	0.776699	0.0410801	0.635206	SLC36A1, SLC1A2, SLC6A13, SLC1A1	355	29	13288	5.16289
GOTERM_MF_FAT	GO:0008289~lipid binding	16	3.1068	0.0434375	0.641753	RBP4, PIK3C2G, ESR1, ESRRG, EEA1, NR3C1, CD1D1, ACBD3, STARD5, BSPRY, DAB1, SERPINA6, CHN2, FABP1, SNX24, CLINT1	355	345	13288	1.73593
GOTERM_MF_FAT	GO:0015171~amino acid transmembrane transporter activity	5	0.970874	0.0436928	0.630076	SLC36A1, SLC1A2, SLC6A13, SLC6A6, SLC1A1	355	50	13288	3.7431
GOTERM_MF_FAT	GO:0015501~glutamate:sodium symporter activity	2	0.38835	0.0525734	0.686262	SLC1A2, SLC1A1	355	2	13288	37.431
GOTERM_MF_FAT	GO:0016769~transferase activity, transferring nitrogenous groups	4	0.776699	0.0526311	0.673879	AADAT, AGXT2L1, AGXT2, AGXT	355	32	13288	4.67887
GOTERM_MF_FAT	GO:0070279~vitamin B6 binding	5	0.970874	0.055311	0.680145	AADAT, AGXT2L1, AGXT2, MOSC1, AGXT	355	54	13288	3.46583
GOTERM_MF_FAT	GO:0030170~pyridoxal phosphate binding	5	0.970874	0.055311	0.680145	AADAT, AGXT2L1, AGXT2, MOSC1, AGXT	355	54	13288	3.46583
GOTERM_MF_FAT	GO:0004435~phosphoinositide phospholipase C activity	3	0.582524	0.059132	0.69324	PLCE1, PLCB4, PLCG1	355	15	13288	7.4862
GOTERM_MF_FAT	GO:0050839~cell adhesion molecule binding	3	0.582524	0.0664205	0.724955	CTNNA1, MLLT4, CTNNA2	355	16	13288	7.01831
GOTERM_MF_FAT	GO:0005096~GTPase activator activity	10	1.94175	0.0711235	0.739116	ARHGAP5, TIAM2, SIPA1L1, GRLF1, RIN2, CHN2, RGS7, GM5820, ARHGAP26, SRGAP2, USP6NL	355	192	13288	1.94953
GOTERM_MF_FAT	GO:0008028~monocarboxylic acid transmembrane transporter activity	3	0.582524	0.0739888	0.743024	SLC16A7, SLC6A6, SLC10A2	355	17	13288	6.60547
GOTERM_MF_FAT	GO:0008453~alanine-glyoxylate transaminase activity	2	0.38835	0.0778172	0.751196	AGXT2, AGXT	355	3	13288	24.954
GOTERM_MF_FAT	GO:0004937~alpha1-adrenergic receptor activity	2	0.38835	0.0778172	0.751196	ADRA1B, ADRA1A	355	3	13288	24.954
GOTERM_MF_FAT	GO:0015296~anion:cation symporter activity	3	0.582524	0.0818168	0.759494	SLC12A6, SLC1A2, SLC1A1	355	18	13288	6.2385
GOTERM_MF_FAT	GO:0005524~ATP binding	48	9.32039	0.0840748	0.75985	SMARCAD1, CDK19, CHKA, CLPB, DNAHC11, PI4K2B, ABCA6, MTHFD1, ACSL1, FIGN, RAD51L1, AAK1, B230120H23RIK, ATP8B1, TLK1, GK5, ADCY10, CHD6, PAPSS2, RHOBTB3, KIF13B, EGFR, DHX8, MYO6, PIK3C2G, LYN, MYO1B, ACACA, AK2, BRIP1, EPRS, DAPK2, ATP13A3, KDR, DAPK1, RAD51, KIF1C, DDX58, ILF2, ADCY9, ADK, HIPK2, ZRANB3, SMARCA2, PCCA, ACSM5, ABCC6, CAMK1D	355	1443	13288	1.24511
GOTERM_MF_FAT	GO:0008134~transcription factor binding	13	2.52427	0.0846033	0.752929	KAT2B, RYBP, TLE4, ZEB1, HDAC11, PPARGC1A, HIPK2, CREG1, MKL2, NRG1, LCOR, TBL1X, TOB1	355	288	13288	1.68959
GOTERM_MF_FAT	GO:0004629~phospholipase C activity	3	0.582524	0.0898854	0.765761	PLCE1, PLCB4, PLCG1	355	19	13288	5.91016
GOTERM_MF_FAT	GO:0020037~heme binding	8	1.5534	0.0903921	0.759129	CYP2D40, CYP7A1, HEBP1, CYP2D26, CYP1A2, CAT, HERC2, CYB5	355	144	13288	2.0795
GOTERM_MF_FAT	GO:0008022~protein C-terminus binding	4	0.776699	0.0952606	0.769485	ATXN1, CADM1, FIGN, PPM1A	355	41	13288	3.6518
GOTERM_MF_FAT	GO:0032559~adenyl ribonucleotide binding	48	9.32039	0.0973199	0.768947	SMARCAD1, CDK19, CHKA, CLPB, DNAHC11, PI4K2B, ABCA6, MTHFD1, ACSL1, FIGN, RAD51L1, AAK1, B230120H23RIK, ATP8B1, TLK1, GK5, ADCY10, CHD6, PAPSS2, RHOBTB3, KIF13B, EGFR, DHX8, MYO6, PIK3C2G, LYN, MYO1B, ACACA, AK2, BRIP1, EPRS, DAPK2, ATP13A3, KDR, DAPK1, RAD51, KIF1C, DDX58, ILF2, ADCY9, ADK, HIPK2, ZRANB3, SMARCA2, PCCA, ACSM5, ABCC6, CAMK1D	355	1460	13288	1.23061
GOTERM_MF_FAT	GO:0005085~guanyl-nucleotide exchange factor activity	8	1.5534	0.0981432	0.763969	PLCE1, DOCK1, TIAM2, AKAP13, DOCK8, FGD6, DOCK4, BCAR3	355	147	13288	2.03706

## Sheet: B-down_3-24
Category	Term	Count	%	PValue	Benjamini-Corrected PValue	Genes	List Total	Pop Hits	Pop Total	Fold Enrichment
GOTERM_MF_FAT	GO:0030528~transcription regulator activity	49	10.6754	7.23876e-05	0.0364551	PTGES2, MYST2, SUPT5H, BHLHE41, NFIL3, MYC, SERTAD2, EGR1, TCFAP2C, IRF2BP2, JUN, MED18, NFE2L1, DEAF1, SBNO2, ELL, TRIB3, SOX4, ZBTB16, XBP1, LHX3, NFATC2, RUNX1, ING1, TCF23, MAF, MAFF, ERF, IKZF4, ESRRA, KLF13, CEBPD, MAFB, CEBPG, TEAD1, MAFK, HDAC5, ATF5, SNAI3, NOTCH1, MRPL28, ID2, CSRNP2, ETS2, SP3, DLX4, NEUROD2, ID4, KLF4	301	1206	13288	1.79367
GOTERM_MF_FAT	GO:0016298~lipase activity	8	1.74292	0.0028629	0.52068	ENPP7, HMOX1, LIPG, ASPG, MGLL, PLA2G6, PNPLA2, PLA2G2E	301	84	13288	4.2044
GOTERM_MF_FAT	GO:0003700~transcription factor activity	30	6.53595	0.00527571	0.59527	ZBTB16, XBP1, LHX3, NFIL3, NFATC2, RUNX1, MYST2, MYC, MAF, EGR1, MAFF, ERF, ESRRA, MAFB, TCFAP2C, CEBPD, CEBPG, TEAD1, MAFK, ATF5, NOTCH1, SNAI3, MRPL28, CSRNP2, SP3, JUN, ETS2, DLX4, NFE2L1, KLF4	301	776	13288	1.70668
GOTERM_MF_FAT	GO:0019842~vitamin binding	9	1.96078	0.00611927	0.544886	THA1, PCX, GOT1, PLOD3, HDC, GPT, ACACB, GPT2, OPN4	301	121	13288	3.2836
GOTERM_MF_FAT	GO:0046983~protein dimerization activity	16	3.48584	0.010462	0.660085	IKZF4, CEBPD, CNDP2, CEBPG, BCL2L1, ZBTB16, MYH9, INHBB, GPD1L, ATF5, ADRB2, XBP1, JUN, VEGFA, NFE2L1, NFIL3	301	340	13288	2.07747
GOTERM_MF_FAT	GO:0004091~carboxylesterase activity	8	1.74292	0.0111797	0.617586	H6PD, ACOT11, LIPG, ASPG, MGLL, PLA2G6, PNPLA2, PLA2G2E	301	108	13288	3.27009
GOTERM_MF_FAT	GO:0004620~phospholipase activity	6	1.30719	0.0137221	0.636726	ENPP7, HMOX1, LIPG, ASPG, PLA2G6, PLA2G2E	301	63	13288	4.2044
GOTERM_MF_FAT	GO:0030145~manganese ion binding	9	1.96078	0.019114	0.709905	SLC11A2, ACVR1B, GALNT2, PCX, NUDT4, CNDP2, PIM1, B3GNT2, XPNPEP1	301	148	13288	2.68456
GOTERM_MF_FAT	GO:0033293~monocarboxylic acid binding	4	0.87146	0.0223295	0.723959	PCX, DGAT1, ACACB, DBI	301	27	13288	6.54017
GOTERM_MF_FAT	GO:0022890~inorganic cation transmembrane transporter activity	8	1.74292	0.0250641	0.72806	SLC11A2, SLC39A14, UQCR10, SLC30A5, ATP1A1, SLC22A5, ATP6V0A4, UQCRQ	301	127	13288	2.78086
GOTERM_MF_FAT	GO:0043565~sequence-specific DNA binding	21	4.57516	0.027318	0.725207	MAF, ERF, MAFF, ESRRA, CEBPD, MAFB, CEBPG, MAFK, ATF5, NOTCH1, XBP1, JUN, ETS2, LHX3, DLX4, NFE2L1, NFIL3, NFATC2, MYC, KLF4, KDM6B	301	556	13288	1.66739
GOTERM_MF_FAT	GO:0003677~DNA binding	53	11.5468	0.0295443	0.722533	PTGES2, BAHCC1, MYST2, BHLHE41, NFIL3, LBR, MYC, ZFP36, EGR1, TCFAP2C, POLG, MBD6, CDK9, C130039O16RIK, JUN, NFE2L1, KDM6B, DEAF1, CARHSP1, SOX4, ZBTB16, ZFP36L2, XBP1, PRDM11, LHX3, HBP1, NFATC2, RUNX1, CHD5, MAF, MAFF, ERF, IKZF4, ESRRA, UPF1, MAFB, KLF13, CEBPD, CEBPG, KLF10, TEAD1, MAFK, SAFB2, ATF5, SNAI3, NOTCH1, MRPL28, CSRNP2, ETS2, SP3, DLX4, NEUROD2, KLF4	301	1781	13288	1.31373
GOTERM_MF_FAT	GO:0042802~identical protein binding	13	2.83224	0.0321851	0.724994	IKZF4, ATL2, CEBPD, CEBPG, ZBTB16, CLDN12, MYH9, CLDN14, INHBB, GPD1L, ADRB2, MAPK1IP1, VEGFA	301	290	13288	1.97897
GOTERM_MF_FAT	GO:0048037~cofactor binding	11	2.39651	0.0327481	0.704791	GPD1L, THA1, GOT1, HDC, PGD, TGDS, GPT, GRHPR, DBI, GPT2, POR	301	226	13288	2.14871
GOTERM_MF_FAT	GO:0030170~pyridoxal phosphate binding	5	1.08932	0.0333255	0.686249	THA1, GOT1, HDC, GPT, GPT2	301	54	13288	4.08761
GOTERM_MF_FAT	GO:0070279~vitamin B6 binding	5	1.08932	0.0333255	0.686249	THA1, GOT1, HDC, GPT, GPT2	301	54	13288	4.08761
GOTERM_MF_FAT	GO:0008374~O-acyltransferase activity	4	0.87146	0.0438297	0.762364	SOAT2, DGAT1, CRAT, CPT1A	301	35	13288	5.04528
GOTERM_MF_FAT	GO:0047635~alanine-oxo-acid transaminase activity	2	0.43573	0.0446455	0.747979	GPT, GPT2	301	2	13288	44.1462
GOTERM_MF_FAT	GO:0004021~L-alanine:2-oxoglutarate aminotransferase activity	2	0.43573	0.0446455	0.747979	GPT, GPT2	301	2	13288	44.1462
GOTERM_MF_FAT	GO:0008289~lipid binding	14	3.05011	0.0498725	0.767307	ESRRA, TENC1, DBI, MCF2L, THY1, APOA4, ANXA7, DGAT1, APOA5, SCARB1, LBP, FABP5, SNX10, OPN4	301	345	13288	1.79144
GOTERM_MF_FAT	GO:0016409~palmitoyltransferase activity	3	0.653595	0.055283	0.784649	1110002B05RIK, ZDHHC7, CPT1A	301	17	13288	7.7905
GOTERM_MF_FAT	GO:0005031~tumor necrosis factor receptor activity	2	0.43573	0.0662175	0.827495	TNFRSF1A, TNFRSF1B	301	3	13288	29.4308
GOTERM_MF_FAT	GO:0015093~ferrous iron transmembrane transporter activity	2	0.43573	0.0662175	0.827495	SLC11A2, SLC39A14	301	3	13288	29.4308
GOTERM_MF_FAT	GO:0043120~tumor necrosis factor binding	2	0.43573	0.0662175	0.827495	TNFRSF1A, TNFRSF1B	301	3	13288	29.4308
GOTERM_MF_FAT	GO:0042803~protein homodimerization activity	9	1.96078	0.0718155	0.838061	GPD1L, INHBB, IKZF4, ADRB2, CEBPD, CEBPG, VEGFA, ZBTB16, MYH9	301	193	13288	2.05863
GOTERM_MF_FAT	GO:0016791~phosphatase activity	10	2.17865	0.0912267	0.892537	DUSP4, DUSP1, PTP4A3, PFKFB3, PTP4A1, FBP1, ATP1A1, PTPN1, TENC1, LPIN1	301	238	13288	1.85488
GOTERM_MF_FAT	GO:0004674~protein serine/threonine kinase activity	15	3.26797	0.0974315	0.898372	PRKAG1, PIM1, PRKAB1, MAPKAPK3, CDK9, PIM3, AKT1, ACVR1B, PKN3, SPEG, MAPK13, RIPK4, MAP3K14, SIK1, NEK7	301	421	13288	1.5729

[truncated: 8 more sheets: B-up_24-36, B-down_24-36, C-up_0-3, C-down_0-3, C-up_3-24, C-down_3-24, C-up_24-36, C-down_24-36]
