# Supplementary material for: Temporal mapping of CEBPA and CEBPB binding during liver regeneration reveals dynamic occupancy and specific regulatory codes for homeostatic and cell cycle gene batteries
Source: HighWire-hosted journal article supplement (doi:10.1101/gr.146399.112), 2013-02-12
Supplement: Supp_Table_S6.xlsx [file Supp_Table_S6.xlsx]

## Sheet: results_full.txt
Jakobsen_Table S6
symbols	model	p_A	z_A	pos_A	neg_A	pos_A_bg	neg_A_bg	p_B	z_B	pos_B	neg_B	pos_B_bg	neg_B_bg	p_C	z_C	pos_C	neg_C	pos_C_bg	neg_C_bg
Alx-4	V$ALX4_01.pfm	NA	NA	NA	NA	NA	NA	0.840379	0.115795	7	2811	227	98409	0.439119	10.5569	9	3025	227	98409
Brachyury	V$BRACH_01.pfm	NA	NA	NA	NA	NA	NA	0.461941	-6.85166	1	2817	21	98615	NA	NA	NA	NA	NA	NA
Zfp161_secondary	Zfp161_secondary.pfm	3.22285e-170	114.179	451	3098	2316	96320	1.07589e-12	38.0966	129	2689	2241	96395	5.57755e-06	-41.9276	32	3002	2150	96486
Nrf-1	V$NRF1_Q6.pfm	7.44678e-170	106.193	491	3058	2790	95846	8.22762e-11	32.0643	144	2674	2790	95846	0.53381	3.19612	88	2946	2686	95950
E2F2_primary|E2F3_primary	E2F2_primary|E2F3_primary.pfm	3.73411e-252	95.3567	818	2731	5431	93205	7.80662e-06	17.2238	213	2605	5431	93205	9.15656e-21	-58.7705	62	2972	5431	93205
Zfp161_primary	Zfp161_primary.pfm	8.15554e-152	92.9077	521	3028	3525	95111	0.353607	4.37319	109	2709	3502	95134	1.58337e-23	-99.3359	22	3012	3502	95134
E2F-1	V$E2F1_Q3_01.pfm	9.1511e-123	88.2782	453	3096	3252	95384	0.000187954	18.3605	131	2687	3254	95382	3.89407e-11	-52.6889	40	2994	3205	95431
TLX1::NFIC	MA0119.1.pfm	1.71051e-36	74.9717	167	3382	1420	97216	6.77226e-39	74.667	150	2668	1420	97216	2.35707e-10	41.8554	92	2942	1420	97216
E2F|E2F	V$E2F_Q4_01|V$E2F_Q6_01.pfm	4.38346e-189	74.3574	866	2683	7720	90916	7.26254e-09	18.6262	309	2509	7720	90916	1.66029e-06	-19.8958	169	2865	7739	90897
STAT3	V$STAT3_01.pfm	9.56104e-11	71.8248	46	3503	402	98234	0.0761115	21.1985	18	2800	410	98226	0.0736836	22.5508	18	3016	377	98259
MTF-1	V$MTF1_Q4.pfm	8.11585e-82	71.3248	409	3140	3718	94918	1.08785e-15	34.0596	198	2620	3718	94918	0.808781	1.03683	117	2917	3718	94918
Tax/CREB	V$TAXCREB_02.pfm	1.39611e-05	69.085	21	3528	187	98449	0.392545	13.7788	8	2810	201	98435	0.668025	-25.8854	4	3030	187	98449
AhR:Arnt	V$AHRARNT_02.pfm	1.10304e-10	67.6542	50	3499	465	98171	0.0184339	27.2393	23	2795	472	98164	0.684882	-11.9304	12	3022	466	98170
E2F2_secondary	E2F2_secondary.pfm	1.48379e-251	66.4764	1310	2239	13448	85188	8.88142e-38	29.5004	641	2177	13448	85188	5.96438e-06	-13.6813	329	2705	13448	85188
HIF-1	V$HIF1_Q3.pfm	5.50427e-50	65.4431	283	3266	2784	95852	0.000953897	17.6128	109	2709	2740	95896	0.0043065	-20.311	60	2974	2781	95855
MIZF	MA0131.1.pfm	6.83469e-63	65.1044	360	3189	3575	95061	2.37938e-11	29.5882	176	2642	3575	95061	0.0387686	10.0287	132	2902	3575	95061
KROX|Egr1_primary	V$KROX_Q6|Egr1_primary.pfm	1.04277e-78	65.0487	451	3098	4505	94131	0.0607313	8.2526	150	2668	4495	94141	7.24506e-18	-60.5952	49	2985	4434	94202
Zic1_primary|Zic2_primary|Zic3_primary	Zic1_primary|Zic2_primary|Zic3_primary.pfm	2.28693e-50	64.8752	289	3260	2868	95768	0.000223224	19.1878	117	2701	2859	95777	1.67823e-06	-37.1136	46	2988	2850	95786
TP53|p53	MA0106.1|V$P53_01.pfm	0.0600862	63.2404	3	3546	23	98613	0.192155	31.1444	2	2816	27	98609	0.609105	-24.2463	1	3033	30	98606
Smad3_secondary	Smad3_secondary.pfm	3.08982e-297	62.5809	1705	1844	19032	79604	3.148e-28	22.1578	790	2028	19032	79604	9.65924e-19	-23.713	399	2635	19032	79604
Tax/CREB	V$TAXCREB_01.pfm	3.28973e-47	62.2069	289	3260	2984	95652	3.96402e-13	34.439	160	2658	2975	95661	0.0043857	14.9397	120	2914	2975	95661
E2F3_secondary	E2F3_secondary.pfm	1.14138e-222	61.8221	1301	2248	14315	84321	7.32558e-34	27.3263	656	2162	14315	84321	0.000434588	-10.1645	371	2663	14285	84351
Egr1|Egr-1|Egr-2|Egr-3	MA0162.1|V$EGR1_01|V$EGR2_01|V$EGR3_01.pfm	4.26734e-39	61.5284	242	3307	2517	96119	0.011781	13.974	95	2723	2551	96085	0.000217362	-29.2186	47	2987	2544	96092
E2F|E2F|E2F|E2F-1	V$E2F_03|V$E2F_Q2|V$E2F_Q3_01|V$E2F1_Q4_01.pfm	5.88924e-106	59.0334	699	2850	7745	90891	4.49002e-05	13.4828	282	2536	7724	90912	0.00012418	-15.6517	180	2854	7663	90973
STAT1	V$STAT1_01.pfm	1.55643e-20	57.5241	136	3413	1491	97145	3.72054e-08	36.3489	83	2735	1479	97157	0.00232329	21.8432	67	2967	1460	97176
Pax-5	V$PAX5_01.pfm	6.82052e-17	56.9816	111	3438	1224	97412	1.32865e-08	39.7682	76	2742	1273	97363	0.0537353	-23.318	23	3011	1116	97520
CRE-BP1	V$CREBP1_Q2.pfm	1.91692e-93	56.2438	666	2883	7684	90952	2.81154e-47	41.1658	457	2361	7710	90926	4.33687e-21	28.8896	391	2643	7710	90926
AhR	V$AHR_01.pfm	6.30349e-13	55.8132	85	3464	951	97685	9.38955e-06	36.3163	53	2765	939	97697	0.00454239	-39.7688	15	3019	964	97672
Sp4_primary	Sp4_primary.pfm	1.95704e-161	55.4921	1139	2410	13662	84974	6.75828e-06	11.3397	476	2342	13653	84983	1.50393e-30	-40.4857	214	2820	13574	85062
Max_secondary	Max_secondary.pfm	7.44385e-107	55.3275	778	2771	9160	89476	4.31092e-41	36.051	495	2323	9160	89476	0.0570667	5.98688	313	2721	9160	89476
Klf7_primary	Klf7_primary.pfm	9.7176e-208	54.2406	1473	2076	18391	80245	1.04116e-22	20.2864	741	2077	18391	80245	3.61082e-20	-25.3509	375	2659	18391	80245
Sp4_secondary	Sp4_secondary.pfm	4.08072e-98	54.0257	743	2806	8906	89730	4.8058e-09	17.6049	349	2469	8900	89736	3.77143e-09	-23.2244	184	2850	8900	89736
NR1H2::RXRA	MA0115.1.pfm	0.00118948	53.0282	18	3531	203	98433	1.88897e-09	84.9199	26	2792	204	98432	1.85518e-09	86.0171	27	3007	203	98433
Whn	V$WHN_B.pfm	5.10222e-219	52.5107	1615	1934	20903	77733	7.81871e-48	27.0584	936	1882	20903	77733	0.572981	1.19737	656	2378	20903	77733
AP-2alphaA	V$AP2ALPHA_03.pfm	3.78453e-32	51.978	258	3291	3105	95531	2.56004e-06	23.2082	136	2682	3092	95544	0.197863	-8.65502	80	2954	3018	95618
ATF4	V$ATF4_Q2.pfm	1.3487e-219	51.9696	1643	1906	21484	77152	1.2075e-115	39.0356	1164	1654	21484	77152	2.45701e-42	25.435	992	2042	21484	77152
Gata6_secondary	Gata6_secondary.pfm	4.75738e-10	50.2205	75	3474	913	97723	0.18921	11.5327	32	2786	887	97749	0.612164	4.47267	28	3006	824	97812
Tcfap2b_secondary	Tcfap2b_secondary.pfm	1.01402e-266	50.1315	2023	1526	27966	70670	8.27039e-53	24.8479	1185	1633	27966	70670	1.26836e-13	-15.6198	677	2357	27947	70689
Tcfap2b_primary	Tcfap2b_primary.pfm	2.1197e-171	49.8815	1407	2142	18705	79931	3.0142e-42	26.8539	840	1978	18705	79931	3.69777e-11	-17.2918	434	2600	18682	79954
Plagl1_primary	Plagl1_primary.pfm	3.7889e-168	49.5165	1399	2150	18694	79942	1.31292e-05	9.51149	628	2190	18694	79942	1.99293e-54	-49.0367	262	2772	18594	80042
HIC1	V$HIC1_03.pfm	1.4917e-253	49.1314	1998	1551	27997	70639	1.59762e-67	27.691	1240	1578	27997	70639	0.346956	-1.89173	837	2197	27997	70639
Mtf1_primary	Mtf1_primary.pfm	8.36135e-46	48.8409	412	3137	5251	93385	2.43215e-17	30.9013	262	2556	5230	93406	7.78671e-06	17.6395	220	2814	5230	93406
NHLH1	MA0048.1.pfm	9.8613e-107	48.5936	950	2599	12528	86108	8.83778e-31	27.7312	581	2237	12528	86108	0.0146831	-7.4684	340	2694	12528	86108
ZNF219	V$ZNF219_01.pfm	7.58961e-78	47.3285	733	2816	9736	88900	0.0273336	6.6875	314	2504	9736	88900	2.00597e-30	-50.963	128	2906	9736	88900
HLF|E4BP4|HLF	MA0043.1|V$E4BP4_01|V$HLF_01.pfm	4.44432e-129	47.1128	1190	2359	16288	82348	2.066e-200	54.621	1155	1663	16286	82350	0	80.7355	1757	1277	16271	82365
CEBPA|C/EBPbeta	MA0102.2|V$CEBPB_02.pfm	0	46.9619	2740	809	42323	56313	0	47.5295	2352	466	42369	56267	0	58.0139	2832	202	42369	56267
LXR direct repeat 4	V$LXR_DR4_Q3.pfm	1.76372e-05	46.6267	40	3509	510	98126	9.10555e-06	46.9699	35	2783	510	98126	0.191504	14.3071	20	3014	488	98148
PPARalpha:RXR-alpha	V$PPARA_01.pfm	0.00214571	46.4641	20	3529	251	98385	1.40466e-05	59.2101	22	2796	257	98379	2.43892e-15	98.2811	40	2994	256	98380
GABPA|GABP	MA0062.2|V$GABP_B.pfm	1.24641e-60	46.1753	598	2951	8026	90610	4.40442e-14	23.2688	347	2471	7989	90647	0.00338639	-11.5186	199	2835	7886	90750
AP-2alphaA|Tcfap2a_primary|Tcfap2c_primary|Tcfap2e_primary	V$AP2ALPHA_02|Tcfap2a_primary|Tcfap2c_primary|Tcfap2e_primary.pfm	0	46.0212	2811	738	44375	54261	1.90746e-98	26.4742	1832	986	44375	54261	4.94806e-25	-17.4602	1080	1954	44375	54261
Pax5	MA0014.1.pfm	4.01438e-39	45.7269	390	3159	5211	93425	4.84058e-07	19.6145	213	2605	5199	93437	0.738973	-1.95733	152	2882	5099	93537
Zfx	MA0146.1.pfm	1.13708e-200	45.6695	1831	1718	26733	71903	6.88551e-33	20.4364	1060	1758	26733	71903	6.02728e-27	-24.3999	565	2469	26733	71903
Klf7_secondary	Klf7_secondary.pfm	3.12561e-85	45.1838	862	2687	11924	86712	0.0108975	7.00017	386	2432	11924	86712	0.0024257	-9.59958	312	2722	11924	86712
SEF-1	V$SEF1_C.pfm	0.191114	44.9598	1	3548	5	98631	0.43022	16.7855	3	2815	62	98574	1	-26.8926	1	3033	32	98604
NRSF	V$NRSF_Q4.pfm	0.000322037	44.7787	29	3520	378	98258	0.0442054	23.742	20	2798	436	98200	0.66268	-14.626	10	3024	405	98231
Pax-4	V$PAX4_01.pfm	1.09113e-30	44.2411	321	3228	4373	94263	0.000827677	14.6059	163	2655	4348	94288	1.30054e-05	-25.6721	83	2951	4221	94415
Klf4	MA0039.2.pfm	9.3854e-167	44.2221	1643	1906	24210	74426	1.55103e-26	19.3072	948	1870	24210	74426	1.58964e-30	-27.991	481	2553	24210	74426
CREB|CREB|Atf1_primary|Jundm2_primary	V$CREB_Q2|V$CREB_Q4|Atf1_primary|Jundm2_primary.pfm	1.8344e-67	44.201	712	2837	9917	88719	2.55657e-58	40.5859	577	2241	9917	88719	1.33024e-64	42.6901	627	2407	9917	88719
E4F1	V$E4F1_Q6.pfm	2.72656e-44	43.6209	479	3070	6647	91989	4.01649e-16	26.9123	309	2509	6647	91989	3.22652e-14	25.4695	319	2715	6647	91989
LXR	V$LXR_Q3.pfm	4.34019e-06	43.4085	51	3498	687	97949	3.37507e-07	48.5354	44	2774	627	98009	1	-1.36445	20	3014	650	97986
AP-2gamma	V$AP2GAMMA_01.pfm	0	42.2912	3064	485	52688	45948	1.49376e-105	25.1265	2077	741	52688	45948	3.12822e-12	-10.3957	1425	1609	52675	45961
C/EBP	V$CEBP_C.pfm	5.17749e-78	41.2706	916	2633	13509	85127	5.45938e-121	48.2707	879	1939	13521	85115	1.36496e-191	58.4771	1075	1959	13505	85131
E2F1|E2F|E2F|E2F|E2F|E2F-1|E2F-1:DP-1|E2F-1:DP-2|E2F-4:DP-1|E2F-4:DP-2|Rb:E2F-1:DP-1	MA0024.1|V$E2F_02|V$E2F_Q3|V$E2F_Q4|V$E2F_Q6|V$E2F1_Q6_01|V$E2F1DP1_01|V$E2F1DP2_01|V$E2F4DP1_01|V$E2F4DP2_01|V$E2F1DP1RB_01.pfm	4.87817e-65	41.1706	773	2776	11327	87309	0.000581947	9.58617	384	2434	11327	87309	0.000114466	-12.7073	281	2753	11327	87309
AP-4	V$AP4_01.pfm	2.61297e-31	41.0955	372	3177	5340	93296	8.84222e-15	28.4308	256	2562	5340	93296	0.967504	-0.607823	163	2871	5340	93296
c-Myc:Max	V$MYCMAX_B.pfm	4.12907e-217	40.7436	2284	1265	37231	61405	8.49182e-61	23.2592	1501	1317	37231	61405	0.00616217	-4.70935	1071	1963	37231	61405
MAZR	V$MAZR_01.pfm	6.84935e-101	40.3664	1210	2339	18410	80226	9.31375e-06	9.73608	621	2197	18410	80226	1.63041e-43	-42.1621	288	2746	18410	80226
CACD	V$CACD_01.pfm	4.05019e-218	40.2955	2327	1222	38327	60309	2.41305e-54	21.839	1509	1309	38327	60309	9.4476e-07	-8.46355	1046	1988	38327	60309
CTCF	MA0139.1.pfm	3.10364e-32	39.646	406	3143	5974	92662	6.40568e-12	24.3188	266	2552	5980	92656	3.14296e-05	-19.7938	130	2904	5958	92678
HIF-1	V$HIF1_Q5.pfm	4.32389e-58	39.2321	749	2800	11299	87337	1.07656e-08	15.4883	425	2393	11299	87337	1.6875e-12	-24.8827	228	2806	11284	87352
EGR	V$EGR_Q6.pfm	1.91741e-176	39.1966	2054	1495	33663	64973	1.76552e-21	14.9694	1209	1609	33662	64974	7.71355e-49	-30.8255	660	2374	33646	64990
CACCC-binding factor	V$CACCCBINDINGFACTOR_Q6.pfm	3.19596e-35	38.9747	458	3091	6830	91806	6.34385e-12	22.9796	296	2522	6830	91806	0.00016459	-16.4615	157	2877	6785	91851
Mycn	MA0104.2.pfm	3.27027e-92	38.9672	1178	2371	18282	80354	9.04696e-41	26.7083	820	1998	18282	80354	0.618372	-1.29875	551	2483	18282	80354
ATF6	V$ATF6_01.pfm	5.29142e-26	38.5314	341	3208	5089	93547	2.34466e-07	20.263	211	2607	5089	93547	0.479221	2.80302	165	2869	5089	93547
MIF-1	V$MIF1_01.pfm	3.16348e-08	37.7862	97	3452	1441	97195	4.79194e-08	36.347	82	2736	1461	97175	4.29395e-05	28.6	73	2961	1413	97223
SP1	MA0079.2.pfm	2.60751e-127	37.6029	1667	1882	27239	71397	1.4937e-07	9.52774	907	1911	27239	71397	1.1156e-42	-32.2598	512	2522	27239	71397
ATF	V$ATF_B.pfm	2.35354e-30	36.8038	434	3115	6690	91946	6.23518e-28	34.7301	356	2462	6680	91956	2.01973e-10	21.7124	301	2733	6690	91946
Tcfcp2l1	MA0145.1.pfm	4.50367e-56	36.6741	810	2739	12762	85874	3.81442e-17	20.8582	525	2293	12747	85889	0.259892	-3.40678	371	2663	12761	85875
E2F-1|E2F-1	V$E2F1_Q4|V$E2F1_Q6.pfm	4.56436e-212	36.1007	2629	920	47351	51285	3.41497e-43	17.827	1723	1095	47351	51285	0.00248138	-4.593	1372	1662	47351	51285
ELK4|Gabpa_primary|Elk1|Elk3|Ets1|Etv1|Gabpa	MA0076.1|Gabpa_primary|Elk1|Elk3|Ets1|Etv1|Gabpa.pfm	4.3605e-35	35.4632	537	3012	8501	90135	4.43868e-11	20.0117	348	2470	8497	90139	0.0529724	6.28551	292	2742	8497	90139
MAZ	V$MAZ_Q6.pfm	6.13015e-133	34.4486	1976	1573	34595	64041	1.81465e-26	16.3743	1267	1551	34595	64041	8.47455e-25	-19.9523	796	2238	34595	64041
ETF	V$ETF_Q6.pfm	7.16987e-227	34.225	2916	633	55553	43083	3.76389e-44	16.6689	1953	865	55553	43083	1.43588e-33	-18.359	1372	1662	55553	43083
Pax-5	V$PAX5_02.pfm	0.0010943	34.0098	39	3510	608	98028	0.627261	-10.3274	15	2803	618	98018	0.905407	0.0398107	19	3015	601	98035
AP-4|AP-4	V$AP4_Q5|V$AP4_Q6.pfm	3.596e-184	33.8449	2595	954	48156	50480	5.91604e-92	24.7448	1918	900	48156	50480	0.02118	3.26865	1546	1488	48156	50480
Zic1_secondary|Zic2_secondary|Zic3_secondary	Zic1_secondary|Zic2_secondary|Zic3_secondary.pfm	5.95746e-90	32.9481	1512	2037	26269	72367	5.95363e-54	25.7969	1135	1683	26264	72372	0.0196025	4.43064	866	2168	26264	72372
Zfp281_primary|Zfp740_primary	Zfp281_primary|Zfp740_primary.pfm	3.05731e-27	32.7825	475	3074	7822	90814	0.0286432	7.37997	256	2562	7826	90810	4.50936e-19	-42.3801	116	2918	7747	90889
RFX1	V$RFX1_02.pfm	4.57493e-19	32.3542	332	3217	5465	93171	2.09375e-11	24.7448	246	2572	5481	93155	6.58028e-07	18.9908	236	2798	5483	93153
Spz1|SZF1-1	MA0111.1|V$SZF11_01.pfm	2.96388e-11	32.1133	188	3361	3082	95554	7.79434e-05	19.8219	127	2691	3070	95566	0.160948	-9.57573	78	2956	2991	95645
Zfp423	MA0116.1.pfm	3.70407e-47	32.0598	859	2690	14589	84047	9.68212e-13	16.9417	557	2261	14520	84116	0.000145439	-10.8298	375	2659	14596	84040
LBP-1|Ascl2_primary	V$LBP1_Q6|Ascl2_primary.pfm	2.93423e-184	31.9993	2782	767	53955	44681	3.08528e-68	20.5745	2000	818	53955	44681	0.0475982	-2.81558	1604	1430	53955	44681
Pax-3	V$PAX3_01.pfm	3.1462e-11	31.9927	188	3361	3088	95548	3.43136e-06	22.7824	135	2683	3093	95543	0.057005	10.0298	114	2920	3084	95552
REST|NRSE|NRSF	MA0138.2|V$NRSE_B|V$NRSF_01.pfm	0.17841	31.8506	3	3546	39	98597	0.175324	28.5032	3	2815	49	98587	0.368744	8.28592	2	3032	41	98595
E12	V$E12_Q6.pfm	2.78969e-104	31.6682	1835	1714	33173	65463	6.48017e-68	25.7452	1404	1414	33173	65463	0.984438	0.00749213	1021	2013	33173	65463
E2F	V$E2F_01.pfm	0.00063011	31.5551	49	3500	798	97838	0.668508	-8.23373	20	2798	798	97838	0.612605	4.33972	28	3006	826	97810
Spdef_primary|Spdef	Spdef_primary|Spdef.pfm	3.96081e-30	31.3351	571	2978	9668	88968	0.000775917	10.1218	333	2485	9712	88924	0.901512	-0.631464	296	2738	9712	88924
HNF4A|HNF4	MA0114.1|V$HNF4_Q6_01.pfm	7.74309e-46	31.3324	869	2680	14936	83700	4.73783e-63	35.308	781	2037	14938	83698	1.34123e-69	37.0951	847	2187	14938	83698
NERF1a	V$NERF_Q2.pfm	1.53704e-25	30.9859	491	3058	8327	90309	9.2694e-16	24.1643	366	2452	8301	90335	0.665929	-1.7921	248	2786	8301	90335
CP2/LBP-1c/LSF	V$CP2_02.pfm	7.73987e-36	30.8584	698	2851	11983	86653	7.82659e-16	20.5826	492	2326	11983	86653	0.000133008	-12.2103	300	2734	11983	86653
ATF-1|CRE-BP1:c-Jun|CREB	V$ATF1_Q6|V$CREBP1CJUN_01|V$CREB_01.pfm	8.41575e-17	30.5832	320	3229	5416	93220	4.67866e-12	25.5776	246	2572	5399	93237	1.49423e-05	16.823	223	2811	5379	93257
CREB	V$CREB_02.pfm	6.35187e-64	30.1871	1277	2272	22832	75804	4.44355e-32	21.683	932	1886	22832	75804	3.26422e-07	10.0868	825	2209	22832	75804
Ddit3::Cebpa	MA0019.1.pfm	1.92999e-65	30.1815	1306	2243	23390	75246	3.72037e-92	34.238	1166	1652	23390	75246	2.8451e-173	44.7511	1443	1591	23390	75246
c-Myb	V$CMYB_01.pfm	4.00542e-10	30.0584	188	3361	3186	95450	0.00594472	13.8713	118	2700	3181	95455	0.564488	-3.95312	91	2943	3158	95478
Arnt::Ahr|AHRHIF|AhR	MA0006.1|V$AHRHIF_Q6|V$AHR_Q5.pfm	5.90961e-79	29.5857	1603	1946	29469	69167	1.44813e-23	16.6761	1095	1723	29469	69167	0.397913	1.50942	928	2106	29469	69167
Rfx3_primary|Rfx4_primary|Rfxdc2_primary	Rfx3_primary|Rfx4_primary|Rfxdc2_primary.pfm	3.9701e-23	29.3501	487	3062	8476	90160	1.51442e-11	20.4165	352	2466	8534	90102	1.17174e-05	13.8186	334	2700	8534	90102
PLAG1	MA0163.1.pfm	1.57934e-08	29.1832	162	3387	2780	95856	0.327729	5.12484	88	2730	2784	95852	9.13663e-14	-71.2095	26	3008	2784	95852
Nr2f2_secondary|Rara_secondary	Nr2f2_secondary|Rara_secondary.pfm	7.77799e-79	28.9715	1658	1891	30864	67772	1.04276e-42	21.5938	1234	1584	30864	67772	0.00372876	5.06146	1025	2009	30864	67772
CAC-binding protein	V$CACBINDINGPROTEIN_Q6.pfm	8.96824e-130	28.9174	2502	1047	49423	49213	8.1642e-32	15.1358	1727	1091	49423	49213	6.34286e-39	-21.3867	1157	1877	49423	49213
Elf2|Elk4|Erg|Etv3|Etv4|Etv5|Etv6|Fli1|Gm4881|Gm5454	Elf2|Elk4|Erg|Etv3|Etv4|Etv5|Etv6|Fli1|Gm4881|Gm5454.pfm	6.24458e-14	28.8356	289	3260	5023	93613	0.277383	4.47648	156	2662	5013	93623	0.111303	6.66239	174	2860	5013	93623
MAX|Max	MA0058.1|V$MAX_01.pfm	5.76579e-36	28.4955	806	2743	14439	84197	1.19174e-47	31.7161	711	2107	14413	84223	1.208e-05	10.8211	532	2502	14413	84223
PPARG::RXRA	MA0065.2.pfm	5.15561e-31	28.4286	697	2852	12434	86202	5.28079e-42	31.9798	620	2198	12433	86203	4.94517e-20	22.8213	564	2470	12465	86171
myogenin / NF-1	V$MYOGNF1_01.pfm	0.107369	28.4238	11	3538	180	98456	1.04347e-05	71.8926	17	2801	160	98476	0.142919	28.4338	8	3026	144	98492
CP2	V$CP2_01.pfm	2.03234e-91	27.9704	1994	1555	38473	60163	2.97267e-42	19.4282	1462	1356	38473	60163	0.15107	2.29148	1223	1811	38473	60163
Sp1	V$SP1_01.pfm	1.6176e-159	27.9604	2982	567	62407	36229	5.41301e-57	17.6586	2181	637	62407	36229	4.39949e-09	-7.91695	1760	1274	62407	36229
RFX1	V$RFX1_01.pfm	6.37347e-23	27.8316	530	3019	9470	89166	4.04535e-22	26.7919	437	2381	9496	89140	2.47746e-15	22.5778	431	2603	9500	89136
AhR:Arnt	V$AHRARNT_01.pfm	1.40455e-19	27.7285	451	3098	8042	90594	1.52464e-05	13.9602	295	2523	8015	90621	0.327452	-3.83323	231	2803	8011	90625
znf143	MA0088.1.pfm	1.06269e-11	27.4957	261	3288	4629	94007	0.0139235	10.6478	158	2660	4532	94104	0.292646	-5.7061	128	2906	4587	94049
Myf	MA0055.1.pfm	6.88448e-58	27.4356	1367	2182	25617	73019	7.55012e-41	23.0116	1061	1757	25616	73020	0.037343	-4.32116	737	2297	25616	73020
AP-4	V$AP4_Q6_01.pfm	5.16246e-137	26.7263	2875	674	60494	38142	7.88032e-87	21.5623	2224	594	60494	38142	0.0468619	2.52127	1915	1119	60494	38142
Gcm1_primary	Gcm1_primary.pfm	5.08125e-26	26.6875	653	2896	11950	86686	1.89944e-06	12.7532	428	2390	11950	86686	2.12512e-05	-13.6439	292	2742	11950	86686
Arnt|Stra13|Bhlhb2_primary	V$ARNT_02|V$STRA13_01|Bhlhb2_primary.pfm	1.63658e-24	26.147	635	2914	11711	86925	4.94685e-39	31.7427	583	2235	11711	86925	0.000377784	9.77703	426	2608	11711	86925
Myb	MA0100.1.pfm	1.43208e-71	26.0396	1812	1737	35555	63081	2.35378e-61	23.8611	1453	1365	35555	63081	7.73363e-23	15.1157	1362	1672	35555	63081
NFKB1|NF-kappaB (p50)	MA0105.1|V$NFKAPPAB50_01.pfm	3.27201e-10	25.944	247	3302	4489	94147	0.216593	5.3352	142	2676	4489	94147	8.41618e-08	-31.8321	78	2956	4408	94228
INSM1	MA0155.1.pfm	1.05018e-32	25.6917	882	2667	16571	82065	1.6325e-13	16.4447	628	2190	16571	82065	2.25827e-10	-17.6499	381	2653	16556	82080
E2A	V$E2A_Q2.pfm	1.21483e-65	25.4378	1744	1805	34387	64249	6.40055e-50	22.0911	1373	1445	34387	64249	0.0192132	-4.20639	995	2039	34387	64249
E47	V$E47_01.pfm	4.58499e-56	25.434	1511	2038	29411	69225	1.173e-32	19.4861	1142	1676	29411	69225	2.96874e-07	-10.1987	776	2258	29438	69198
LRF	V$LRF_Q2.pfm	2.23673e-122	25.1306	2890	659	62183	36453	4.80051e-18	10.2407	1998	820	62183	36453	1.00383e-29	-16.1091	1602	1432	62183	36453
Pax-3	V$PAX3_B.pfm	1.20972e-39	24.6074	1151	2398	22274	76362	1.12059e-23	18.9741	871	1947	22274	76362	1.41871e-07	10.5281	811	2223	22274	76362
AREB6|E2A|MyoD	V$AREB6_02|V$E2A_Q6|V$MYOD_Q6.pfm	4.23919e-76	24.1742	2154	1395	44340	54296	4.38254e-76	23.6925	1762	1056	44340	54296	0.643274	0.683728	1377	1657	44340	54296
Myc|CLOCK:BMAL	MA0147.1|V$CLOCKBMAL_Q6.pfm	5.65614e-40	23.9513	1215	2334	23823	74813	6.00566e-30	20.5772	953	1865	23823	74813	0.546533	-1.33276	718	2316	23823	74813
LUN-1	V$LUN1_01.pfm	0.232503	23.8155	3	3546	45	98591	0.102336	36.2144	4	2814	60	98576	0.70438	-9.1046	2	3032	59	98577
HEB|TAL1	V$HEB_Q6|V$TAL1_Q6.pfm	6.39345e-53	23.8138	1603	1946	32120	66516	1.79693e-37	19.9767	1249	1569	32120	66516	0.828739	-0.442433	982	2052	32120	66516
Myb_secondary|Mybl1_secondary	Myb_secondary|Mybl1_secondary.pfm	7.41322e-25	23.7612	767	2782	14776	83860	3.91261e-28	24.7151	647	2171	14776	83860	2.2658e-10	15.1632	586	2448	14776	83860
CREB	V$CREB_Q2_01.pfm	8.99226e-36	23.3811	1139	2410	22447	76189	1.44057e-56	28.2441	1020	1798	22447	76189	5.02473e-51	27.1562	1062	1972	22447	76189
Zfp740_secondary	Zfp740_secondary.pfm	2.28308e-17	23.2824	546	3003	10498	88138	0.153197	-4.80998	275	2543	10468	88168	2.92683e-16	-31.0683	191	2843	10498	88138
Zbtb3_primary	Zbtb3_primary.pfm	1.21798e-43	23.1737	1402	2147	28070	70566	5.58574e-37	21.0858	1121	1697	28070	70566	3.08244e-14	13.2855	1059	1975	28070	70566
NF-muE1	V$NFMUE1_Q6.pfm	7.1291e-12	22.8898	369	3180	7086	91550	0.482434	2.40843	212	2606	7086	91550	1.65943e-08	-25.2631	141	2893	7086	91550
MYC::MAX|c-Myc:Max|Max_primary	MA0059.1|V$MYCMAX_01|Max_primary.pfm	2.34421e-14	22.7321	461	3088	8910	89726	1.78887e-12	20.846	370	2448	8910	89726	0.209012	-4.63905	253	2781	8896	89740
PPAR direct repeat 1	V$PPAR_DR1_Q2.pfm	4.55959e-22	22.5802	743	2806	14567	84069	1.10448e-33	27.0531	664	2154	14567	84069	3.13289e-29	25.4974	684	2350	14536	84100
Zfp128_primary	Zfp128_primary.pfm	2.74846e-11	22.1016	372	3177	7236	91400	0.462453	2.48261	215	2603	7177	91459	2.20573e-08	-24.7451	145	2889	7221	91415
Hic1_primary	Hic1_primary.pfm	1.60693e-22	21.8696	804	2745	15981	82655	6.46346e-15	17.5685	618	2200	15981	82655	0.281891	-2.8909	469	2565	15981	82655
Bhlhb2_secondary	Bhlhb2_secondary.pfm	0.0023013	21.5276	78	3471	1506	97130	0.00558828	19.1552	63	2755	1530	97106	0.252809	-12.0905	37	2997	1477	97159
XBP-1	V$XBP1_01.pfm	0.00010579	21.5107	130	3419	2523	96113	0.000129467	20.7106	108	2710	2564	96072	0.148136	8.277	92	2942	2564	96072
AREB6	V$AREB6_03.pfm	8.70403e-41	21.4579	1503	2046	31023	67613	6.17699e-21	15.3511	1126	1692	31023	67613	0.00777425	-5.04981	885	2149	31023	67613
Gm397_secondary	Gm397_secondary.pfm	2.96235e-22	21.1792	841	2708	16924	81712	1.0803e-24	21.9069	703	2115	16924	81712	0.029724	5.11565	567	2467	16924	81712
USF1|Arnt|Myc|N-Myc|TFE|c-Myc:Max	MA0093.1|MA0004.1|V$MYC_Q2|V$NMYC_01|V$TFE_Q6|V$MYCMAX_03.pfm	3.94093e-51	21.156	1896	1653	40105	58531	8.23134e-42	18.963	1508	1310	40105	58531	0.398565	1.31426	1257	1777	40105	58531
HIF1A::ARNT	MA0259.1.pfm	5.83855e-69	21.0805	2458	1091	53838	44798	1.65439e-31	14.4538	1848	970	53838	44798	0.000147703	-5.43477	1550	1484	53838	44798
MyoD	V$MYOD_01.pfm	1.24001e-41	21.0271	1587	1962	33100	65536	2.75588e-48	22.1407	1327	1491	33100	65536	3.84227e-05	6.89572	1128	1906	33100	65536
myogenin|Myf6_primary	V$MYOGENIN_Q6|Myf6_primary.pfm	6.10449e-53	20.5185	2058	1491	44315	54321	2.10714e-61	21.5694	1710	1108	44307	54329	5.26686e-09	8.35715	1526	1508	44315	54321
Glis2_primary|Zbtb7b_secondary	Glis2_primary|Zbtb7b_secondary.pfm	6.24259e-32	20.119	1329	2220	27756	70880	0.0195127	4.31107	850	1968	27756	70880	2.23137e-34	-27.7714	559	2475	27756	70880
MZF1	V$MZF1_01.pfm	1.67377e-73	19.1025	2955	594	68865	29771	7.98513e-22	10.6892	2198	620	68865	29771	9.77812e-16	-10.5107	1908	1126	68865	29771
EBF1|Helios A	MA0154.1|V$HELIOSA_01.pfm	1.45795e-33	19.0367	1538	2011	32945	65691	6.42621e-13	11.6717	1126	1692	32930	65706	8.92558e-06	-8.27386	897	2137	32945	65691
PPARalpha:RXR-alpha	V$PPARA_02.pfm	0.015203	18.4253	66	3483	1339	97297	0.116406	11.8116	48	2770	1332	97304	0.203424	-13.8097	33	3001	1357	97279
Hic1_secondary	Hic1_secondary.pfm	5.11799e-31	18.3364	1524	2025	32958	65678	2.25138e-13	11.9082	1131	1687	32958	65678	0.171538	2.33744	1050	1984	32958	65678
CREB1	MA0018.2.pfm	1.41538e-27	18.1956	1377	2172	29652	68984	5.93952e-34	19.7789	1156	1662	29652	68984	2.62878e-14	12.9825	1111	1923	29652	68984
Lmo2 complex|MyoD|Tcfe2a_primary	V$LMO2COM_01|V$MYOD_Q6_01|Tcfe2a_primary.pfm	4.68953e-51	18.0995	2447	1102	55656	42980	1.21171e-38	15.6653	1932	886	55656	42980	0.435067	-1.10154	1690	1344	55656	42980
ESR2	MA0258.1.pfm	3.01958e-07	18.0159	321	3228	6657	91979	1.82267e-11	22.7492	288	2530	6670	91966	0.000275476	12.9908	256	2778	6616	92020
KAISO	V$KAISO_01.pfm	2.77745e-25	17.6925	1330	2219	28797	69839	4.8214e-27	18.0061	1094	1724	28797	69839	0.584231	1.00565	900	2134	28797	69839
YY1	V$YY1_02.pfm	0.00363997	16.7363	116	3433	2433	96203	0.498378	3.7148	75	2743	2433	96203	0.0229852	-17.5413	55	2979	2427	96209
ESR1|ER	MA0112.2|V$ER_Q6.pfm	0.00462616	16.5718	113	3436	2376	96260	3.80101e-07	27.9093	112	2706	2332	96304	0.0231723	13.2886	94	2940	2395	96241
VDR	V$VDR_Q3.pfm	6.00291e-20	16.3433	1207	2342	26534	72102	2.12473e-10	11.5256	913	1905	26534	72102	1.53296e-15	-17.4517	623	2411	26516	72120
VDR, CAR, PXR	V$DR3_Q4.pfm	8.53738e-05	16.0113	238	3311	5083	93553	5.34539e-05	16.1725	197	2621	5116	93520	0.738928	-1.87967	152	2882	5092	93544
Zfp187_secondary	Zfp187_secondary.pfm	2.35657e-13	15.753	842	2707	18435	80201	0.000178421	8.31086	606	2212	18404	80232	0.0929561	-4.18432	530	2504	18435	80201
NR2F1|HNF-4 direct repeat 1	MA0017.1|V$HNF4_DR1_Q3.pfm	2.82606e-08	15.5429	500	3049	10859	87777	9.91549e-22	25.0986	483	2335	10848	87788	4.01316e-30	29.3408	551	2483	10882	87754
ZBRK1	V$ZBRK1_01.pfm	0.00159229	15.1298	169	3380	3651	94985	3.8165e-06	21.3287	153	2665	3605	95031	0.241554	-7.07328	100	2934	3670	94966
GCM	V$GCM_Q2.pfm	2.99763e-13	14.9449	922	2627	20494	78142	0.000242944	7.72971	667	2151	20494	78142	0.0067931	-6.39468	569	2465	20494	78142
Zbtb7b_primary	Zbtb7b_primary.pfm	4.74548e-12	14.8701	837	2712	18574	80062	0.016494	-5.91422	480	2338	18556	80080	2.30145e-31	-33.6015	332	2702	18556	80080
TFII-I	V$TFIII_Q6.pfm	1.24695e-25	14.7128	1876	1673	43335	55301	0.000203085	5.47709	1338	1480	43335	55301	7.51434e-17	-13.982	1103	1931	43335	55301
MZF1_1-4	MA0056.1.pfm	5.65322e-47	14.6799	3099	450	76665	21971	2.40528e-17	8.98923	2373	445	76665	21971	8.82493e-13	-8.8229	2187	847	76665	21971
LXR, PXR, CAR, COUP, RAR	V$DR4_Q2.pfm	0.00154979	14.339	186	3363	4074	94562	3.39302e-06	20.2233	169	2649	4068	94568	0.10584	7.49189	144	2890	4083	94553
Hnf4a_primary	Hnf4a_primary.pfm	4.33972e-10	14.2587	744	2805	16618	82018	1.00495e-11	15.2443	617	2201	16618	82018	0.000363534	8.30777	587	2447	16618	82018
alpha-CP1	V$ALPHACP1_01.pfm	0.000659822	14.1249	223	3326	4909	93727	0.00114359	13.4584	179	2639	4881	93755	0.188433	5.49787	166	2868	4881	93755
Zec	V$ZEC_01.pfm	0.0444717	13.9867	74	3475	1618	97018	1.33094e-05	28.5866	79	2739	1618	97018	1.07638e-05	29.2646	82	2952	1571	97065
Rxra_primary	Rxra_primary.pfm	7.11225e-22	13.959	1766	1783	41032	57604	1.31332e-22	13.9957	1434	1384	41032	57604	0.16088	2.15846	1301	1733	41032	57604
C/EBPdelta	V$CEBPDELTA_Q6.pfm	6.55117e-20	13.9455	1610	1939	37195	61441	2.36027e-61	23.3474	1505	1313	37288	61348	2.01829e-212	39.604	2008	1026	37288	61348
Arnt	V$ARNT_01.pfm	7.43526e-15	13.9321	1193	2356	27168	71468	2.64403e-22	16.8396	1016	1802	27153	71483	0.00026311	6.74737	928	2106	27168	71468
Zfp691_secondary	Zfp691_secondary.pfm	1.955e-19	13.455	1679	1870	39153	59483	0.0139038	3.85566	1184	1634	39153	59483	0.000176093	-6.33114	1102	1932	39153	59483
Tel-2	V$TEL2_Q6.pfm	6.02222e-05	13.3743	348	3201	7788	90848	0.00146171	10.6065	270	2548	7788	90848	0.231055	-4.75322	221	2813	7788	90848
MAF	V$MAF_Q6_01.pfm	9.63067e-18	13.0598	1616	1933	37805	60831	4.21448e-41	19.3391	1437	1381	37805	60831	0.000139433	5.98847	1267	1767	37805	60831
Esrra_secondary	Esrra_secondary.pfm	3.66488e-11	13.0033	994	2555	22808	75828	6.9338e-22	18.0898	876	1942	22750	75886	0.000900789	6.69925	781	2253	22808	75828
ELK1|Elk-1|c-Ets-1(p54)	MA0028.1|V$ELK1_02|V$CETS1P54_01.pfm	1.65144e-18	12.9207	1717	1832	40389	58247	8.18399e-08	8.05217	1297	1521	40389	58247	0.420318	-1.33025	1220	1814	40389	58247
TEF-1|p53	V$TEF1_Q6|V$P53_02.pfm	1.42873e-30	12.919	2735	814	67253	31383	3.73049e-17	9.58996	2128	690	67255	31381	0.464083	0.884616	2088	946	67253	31383
NFYA	MA0060.1.pfm	1.54118e-08	12.8619	748	2801	17076	81560	0.00020944	8.52231	565	2253	17076	81560	4.8586e-17	18.3067	711	2323	17092	81544
ZID	V$ZID_01.pfm	9.57438e-05	12.4385	377	3172	8573	90063	0.76003	0.920109	249	2569	8555	90081	0.000302562	-13.785	208	2826	8566	90070
GLI	V$GLI_Q2.pfm	1.60676e-09	12.2955	920	2629	21291	77345	0.000205729	7.68971	692	2126	21291	77345	3.66888e-13	-17.7782	493	2541	21291	77345
Nanog	V$NANOG_01.pfm	6.10788e-08	12.2238	754	2795	17387	81249	5.88354e-12	15.0942	644	2174	17412	81224	4.15819e-14	16.5115	703	2331	17412	81224
NF-1	V$NF1_Q6.pfm	1.00539e-35	12.2236	3258	291	83556	15080	5.61485e-32	11.4141	2597	221	83556	15080	1.04376e-06	5.13163	2666	368	83556	15080
Ehf|Elf3|Elf4	Ehf|Elf3|Elf4.pfm	2.66664e-05	11.988	471	3078	10817	87819	0.625279	1.36308	318	2500	10847	87789	0.0983525	-5.44038	304	2730	10831	87805
Osr1_primary|Osr2_primary	Osr1_primary|Osr2_primary.pfm	6.7128e-06	11.9621	545	3004	12547	86089	2.81399e-08	14.3867	462	2356	12547	86089	0.038249	5.61348	425	2609	12547	86089
Ar	MA0007.1.pfm	0.00609782	11.565	214	3335	4911	93725	1.02147e-06	19.5937	199	2619	4855	93781	0.0125553	10.4425	182	2852	4905	93731
Duxl_1286.2	Duxl_1286.2.pfm	0.0267402	11.0323	151	3398	3487	95149	0.138006	7.30143	117	2701	3562	95074	2.67261e-13	32.1325	195	2839	3591	95045
E47	V$E47_02.pfm	1.43967e-09	10.3407	1288	2261	30995	67641	2.26504e-12	11.7541	1064	1754	30995	67641	0.96833	-0.132135	952	2082	30995	67641
MZF1_5-13|Egr1_secondary	MA0057.1|Egr1_secondary.pfm	1.56605e-14	10.2802	2037	1512	50153	48483	0.00141397	4.39554	1519	1299	50153	48483	2.0085e-19	-14.0394	1291	1743	50153	48483
ZNF354C	MA0130.1.pfm	1.45519e-22	9.94061	3172	377	82370	16266	4.15776e-15	8.03695	2503	315	82370	16266	0.371491	-1.02979	2515	519	82370	16266
SMAD|Smad3_primary	V$SMAD_Q6_01|Smad3_primary.pfm	2.795e-12	9.75721	1885	1664	46498	52138	1.56243e-15	10.9171	1543	1275	46498	52138	0.189903	1.90664	1465	1569	46427	52209
Myb_primary|Mybl1_primary	Myb_primary|Mybl1_primary.pfm	0.0003493	9.63385	519	3030	12389	86247	0.00302472	7.99973	408	2410	12389	86247	2.21447e-21	23.6028	568	2466	12389	86247
NFIL3|CRE-BP1	MA0025.1|V$CREBP1_01.pfm	0.000259287	9.41687	570	2979	13669	84967	1.34435e-11	16.5926	522	2296	13669	84967	1.41531e-75	39.8726	814	2220	13669	84967
RXR::RAR_DR5	MA0159.1.pfm	0.0729912	9.37242	133	3416	3154	95482	0.000347371	17.6166	129	2689	3248	95388	0.0523152	9.846	122	2912	3313	95323
RELA|NF-kappaB|REL|NF-kappaB (p65)|c-Rel	MA0107.1|MA0061.1|MA0101.1|V$NFKAPPAB65_01|V$CREL_01.pfm	0.000101303	9.20427	673	2876	16230	82406	0.0326186	5.12835	507	2311	16230	82406	0.141419	-3.93679	466	2568	16156	82480
Hand1::Tcfe2a|Hand1:E47	MA0092.1|V$HAND1E47_01.pfm	1.08762e-09	8.74612	1788	1761	44564	54072	2.05148e-08	8.0101	1425	1393	44593	54043	0.82417	0.310325	1377	1657	44564	54072
NF-E2|Nrf2	V$NFE2_01|V$NRF2_Q4.pfm	0.000383683	8.54205	652	2897	15879	82757	6.1075e-20	20.355	644	2174	15879	82757	1.67109e-12	16.1533	639	2395	15879	82757
ATF|CREB|CREBATF	V$ATF_01|V$CREB_Q4_01|V$CREBATF_Q6.pfm	4.99973e-09	8.33215	1808	1741	45328	53308	6.1224e-28	14.8195	1590	1228	45328	53308	5.74766e-27	14.6328	1695	1339	45328	53308
EBF	V$EBF_Q6.pfm	7.32529e-05	8.11162	900	2649	22176	76460	0.00107775	6.65627	708	2110	22176	76460	0.0125199	-5.6216	624	2410	22176	76460
CREB	V$CREB_Q3.pfm	5.47516e-14	8.05518	2988	561	78058	20578	3.84035e-34	12.3256	2480	338	78058	20578	7.36199e-11	6.99911	2545	489	78058	20578
MZF1	V$MZF1_02.pfm	4.63564e-08	7.91464	1752	1797	44101	54535	0.0478637	2.91674	1313	1505	44101	54535	3.8939e-17	-13.9797	1124	1910	44101	54535
Rfxdc2_secondary	Rfxdc2_secondary.pfm	0.000309331	7.63772	833	2716	20645	77991	0.222229	2.58926	616	2202	20629	78007	0.0125813	-5.83361	578	2456	20629	78007
ER	V$ER_Q6_02.pfm	1.18403e-10	7.47114	2636	913	68329	30307	7.56341e-31	12.6877	2229	589	68329	30307	3.62652e-19	10.0977	2327	707	68329	30307
TBX5|Eomes_secondary	V$TBX5_01|Eomes_secondary.pfm	8.91155e-07	7.46916	1605	1944	40502	58134	2.64712e-12	10.3338	1344	1474	40502	58134	0.586976	0.840119	1261	1773	40502	58134
NFE2L2	MA0150.1.pfm	0.00990585	7.37731	454	3095	11217	87419	3.25036e-22	25.0324	497	2321	11185	87451	1.51789e-13	19.7028	483	2551	11217	87419
Zfp691_primary	Zfp691_primary.pfm	0.00306406	7.0562	655	2894	16325	82311	7.33429e-06	10.4067	561	2257	16406	82230	0.00877384	6.22544	560	2474	16406	82230
Hmx3 (Nkx5-1)	V$HMX1_01.pfm	0.0987331	6.72781	217	3332	5391	93245	0.000135638	14.9696	203	2615	5391	93245	0.291222	-5.11157	152	2882	5391	93245
AP-1	V$AP1FJ_Q2.pfm	8.63828e-07	6.55986	2054	1495	52952	45684	1.72937e-27	13.6379	1802	1016	52952	45684	1.14261e-21	12.1986	1894	1140	52952	45684
TBX5	V$TBX5_02.pfm	1.39307e-08	6.4207	2771	778	72873	25763	3.17407e-19	9.73646	2287	531	72873	25763	0.0534598	2.23432	2289	745	72873	25763
HNF-4alpha	V$HNF4ALPHA_Q6.pfm	0.00539288	6.16521	757	2792	19160	79476	3.61745e-07	10.9004	659	2159	19173	79463	1.07031e-29	22.7431	853	2181	19170	79466
SF-1	V$SF1_Q6.pfm	0.000740468	6.0427	1157	2392	29526	69110	1.14216e-09	10.5133	996	1822	29526	69110	7.85179e-08	9.39533	1048	1986	29526	69110
ETS|Ets	V$ETS_Q4|V$ETS_Q6.pfm	4.63011e-06	5.45571	2538	1011	66957	31679	1.19294e-06	5.72502	2034	784	66957	31679	3.54335e-06	-5.98869	1937	1097	66957	31679
Hnf4a_secondary	Hnf4a_secondary.pfm	0.0237663	5.32586	663	2886	16974	81662	8.22655e-08	12.106	596	2222	16942	81694	1.15553e-21	20.6711	734	2300	16974	81662
NR4A2	MA0160.1.pfm	0.000158996	5.24057	1894	1655	49456	49180	9.14817e-21	12.2846	1664	1154	49456	49180	3.90761e-19	11.8459	1771	1263	49456	49180
c-Ets-1	V$ETS1_B.pfm	0.0103489	4.97746	975	2574	25200	73436	2.29012e-09	11.1351	863	1955	25196	73440	0.0423984	-4.26527	726	2308	25216	73420
NKX25	V$NKX25_Q5.pfm	0.00395911	4.66714	1402	2147	36605	62031	0.000236129	5.86231	1142	1676	36605	62031	0.40132	1.37682	1149	1885	36605	62031
Stat3	MA0144.1.pfm	0.0530389	4.59933	645	2904	16695	81941	1.5948e-07	11.9561	586	2232	16695	81941	0.460986	1.7609	529	2505	16688	81948
Esrrb|ERR alpha|Esrra_primary|Nr2f2_primary|Rara_primary	MA0141.1|V$ERR1_Q2|Esrra_primary|Nr2f2_primary|Rara_primary.pfm	0.0294416	4.37216	910	2639	23711	74925	2.5544e-23	18.3145	915	1903	23722	74914	6.15983e-28	20.0565	1001	2033	23711	74925
Six4_2860.1	Six4_2860.1.pfm	0.0570071	3.97855	845	2704	22130	76506	1.82388e-07	10.4245	752	2066	22130	76506	0.00288381	6.10486	751	2283	22130	76506
RBP-Jkappa	V$RBPJK_01.pfm	0.0657798	3.86792	820	2729	21505	77131	0.000310149	7.41707	695	2123	21484	77152	0.0988234	3.46551	700	2334	21510	77126
SPIB|PU.1	MA0081.1|V$PU1_Q6.pfm	0.00360476	3.74489	2208	1341	58954	39682	5.52727e-06	5.72333	1804	1014	58954	39682	0.000198907	-5.07304	1711	1323	58954	39682
RXRA::VDR	MA0074.1.pfm	0.633671	2.91491	60	3489	1575	97061	0.0145785	17.0971	62	2756	1564	97072	0.106406	11.3843	60	2974	1575	97061
Bach2	V$BACH2_01.pfm	0.280311	2.00497	1037	2512	27998	70638	3.71294e-13	12.7251	980	1838	27998	70638	4.75293e-06	8.24784	978	2056	27998	70638
PEBP	V$PEBP_Q6.pfm	0.453989	1.83007	578	2971	15604	83032	0.0158457	5.90013	491	2327	15503	83133	0.390409	2.12364	497	2537	15580	83056
MEIS1	V$MEIS1_01.pfm	0.23078	1.43156	2533	1016	69471	29165	1.61115e-26	11.7068	2238	580	69471	29165	6.59053e-17	9.39429	2345	689	69471	29165
Cphx_3484.1	Cphx_3484.1.pfm	0.708575	1.37106	201	3348	5449	93187	5.30251e-05	15.6186	208	2610	5460	93176	3.65564e-26	36.9099	320	2714	5473	93163
MAF	V$MAF_Q6.pfm	0.74335	1.12806	212	3337	5771	92865	0.242722	4.47461	183	2635	5886	92750	0.0351216	-9.74407	153	2881	5886	92750
RREB1|RREB-1	MA0073.1|V$RREB1_01.pfm	0.798257	1.02723	152	3397	4140	94496	0.182234	-7.37107	104	2714	4151	94485	7.89202e-10	-39.7398	64	2970	4136	94500
SMAD-3	V$SMAD3_Q6.pfm	0.577195	0.936879	1236	2313	33903	64733	0.000252783	6.06402	1063	1755	33903	64733	0.0875972	-3.09012	997	2037	33903	64733
TEAD1	MA0090.1.pfm	0.708839	0.924384	491	3058	13437	85199	0.00102594	8.46425	445	2373	13416	85220	3.47385e-07	12.8994	514	2520	13433	85203
c-Myc:Max	V$MYCMAX_02.pfm	0.838696	0.405734	815	2734	22502	76134	4.88362e-11	12.836	795	2023	22494	76142	0.0458196	4.11476	740	2294	22514	76122
Lyf-1	V$LYF1_01.pfm	0.654343	-0.642194	1984	1565	55521	43115	0.512625	0.869941	1604	1214	55521	43115	0.527615	-0.897506	1690	1344	55521	43115
C/EBPbeta	V$CEBPB_01.pfm	0.570758	-0.651035	3042	507	84877	13759	8.59841e-21	9.22486	2588	230	84877	13759	3.05323e-85	17.1452	2933	101	84878	13758
ARP-1 (COUP-TF2)	V$ARP1_01.pfm	0.914653	-0.774081	214	3335	6009	92627	0.0507371	7.41281	197	2621	6007	92629	0.69999	1.43407	190	2844	6007	92629
Plagl1_secondary	Plagl1_secondary.pfm	0.908251	-0.94265	183	3366	5151	93485	0.245848	-5.71479	133	2685	5151	93485	8.89752e-09	-31.9787	89	2945	5036	93600
AP-1|AP-1	V$AP1_Q2|V$AP1_Q4.pfm	0.622814	-1.01852	999	2550	28155	70481	1.99191e-07	9.27014	933	1885	28163	70473	5.47356e-06	8.18983	984	2050	28200	70436
Nkx1-1_3856.3	Nkx1-1_3856.3.pfm	0.714373	-1.47105	298	3251	8466	90170	0.0600388	-7.03901	213	2605	8444	90192	0.000662112	10.8821	317	2717	8520	90116
Ehf_primary|Elf3_primary|Elf5	Ehf_primary|Elf3_primary|Elf5.pfm	0.382136	-1.68601	1050	2499	29866	68770	0.119034	2.79491	892	1926	29862	68774	0.588054	-1.08889	904	2130	29862	68774
Rfx3_secondary|Rfx4_secondary	Rfx3_secondary|Rfx4_secondary.pfm	0.419422	-1.80984	809	2740	23076	75560	0.08249	3.50463	699	2119	23076	75560	0.0264755	4.50604	763	2271	23076	75560
Tgif1_2342.2	Tgif1_2342.2.pfm	0.388258	-2.61883	445	3104	12871	85765	0.0160495	6.40319	412	2406	12871	85765	0.0267429	5.89724	437	2597	12842	85794
Tcfe2a_secondary	Tcfe2a_secondary.pfm	0.0624603	-3.07785	1379	2170	39871	58765	1.23485e-09	9.11815	1301	1517	39871	58765	0.652228	0.699647	1239	1795	39871	58765
AP1|AP-1|AP-1|AP-1	MA0099.2|V$AP1_Q6|V$AP1_C|V$AP1_01.pfm	0.00506018	-4.10535	1740	1809	50724	47912	3.00244e-17	11.0615	1676	1142	50724	47912	5.52066e-23	12.8097	1835	1199	50724	47912
Gcm1_secondary	Gcm1_secondary.pfm	0.0733186	-4.25353	671	2878	19863	78773	0.00128247	-7.76095	499	2319	19883	78753	2.13695e-08	-13.8751	489	2545	19883	78753
Zscan4_secondary	Zscan4_secondary.pfm	0.0395802	-4.36915	827	2722	24479	74157	9.87754e-06	8.50281	804	2014	24479	74157	5.44305e-08	10.3801	887	2147	24479	74157
HOXA5 (Hox-1.3)	V$HOX13_01.pfm	1	-4.39281	7	3542	195	98441	0.801725	-22.9997	3	2815	140	98496	0.821706	-18.6348	4	3030	163	98473
Irf4_primary|Irf5_primary|Irf6_primary	Irf4_primary|Irf5_primary|Irf6_primary.pfm	0.122822	-4.48657	453	3096	13488	85148	0.000208995	-11.0738	318	2500	13488	85148	0.00119532	8.40334	479	2555	13501	85135
Zfp281_secondary	Zfp281_secondary.pfm	0.163831	-4.63602	348	3201	10396	88240	0.00500012	-9.5387	251	2567	10392	88244	2.68605e-09	-21.5441	219	2815	10269	88367
Mrg2_2302.1|Pknox2_3077.2|Tgif2_3451.1	Mrg2_2302.1|Pknox2_3077.2|Tgif2_3451.1.pfm	0.244334	-4.89665	234	3315	7025	91611	0.00422423	10.0349	240	2578	6987	91649	0.0220535	8.19241	250	2784	7028	91608
HOXA7	V$HOXA7_01.pfm	0.00110406	-5.13055	1505	2044	44567	54069	0.0300636	-3.38757	1215	1603	44567	54069	2.55187e-14	10.7354	1584	1450	44567	54069
RBP-Jkappa	V$RBPJK_Q4.pfm	0.00347998	-5.14967	1190	2359	35428	63208	0.889152	-0.306396	1008	1810	35428	63208	0.24917	1.91436	1121	1913	35428	63208
NF-AT|NF-AT	V$NFAT_Q6|V$NFAT_Q4_01.pfm	2.48677e-07	-5.87702	3080	469	88357	10279	0.0858995	-1.88884	2496	322	88357	10279	0.00134135	3.33684	2772	262	88357	10279
TAL1::TCF3|Tal-1alpha:E47|Tal-1beta:E47|Tal-1beta:ITF-2	MA0091.1|V$TAL1ALPHAE47_01|V$TAL1BETAE47_01|V$TAL1BETAITF2_01.pfm	0.00973608	-6.02501	680	2869	20662	77974	0.00803923	5.61336	649	2169	20662	77974	0.000416727	7.42865	717	2317	20662	77974
Bach1|Jundm2_secondary	V$BACH1_01|Jundm2_secondary.pfm	0.0182923	-6.50345	488	3061	14982	83654	2.3761e-05	10.2777	512	2306	14982	83654	2.66264e-08	13.3109	576	2458	14982	83654
TBX5	V$TBX5_Q5.pfm	0.101846	-6.63399	236	3313	7286	91350	0.188917	4.65428	227	2591	7286	91350	0.75113	-1.45044	219	2815	7286	91350
Gm397_primary|Zscan4_primary	Gm397_primary|Zscan4_primary.pfm	0.0451427	-6.90804	316	3233	9789	88847	0.0201041	7.01655	319	2499	9834	88802	0.0191802	7.11776	340	2694	9763	88873
Sfpi1_primary|Sfpi1|Spic	Sfpi1_primary|Sfpi1|Spic.pfm	0.00671226	-7.23551	518	3031	16073	82563	0.517089	-1.75638	444	2374	16001	82635	0.0545002	-5.10991	455	2579	16085	82551
PXR, CAR, LXR, FXR	V$PXR_Q2.pfm	6.13329e-10	-7.66518	2505	1044	74209	24427	0.352551	1.08113	2142	676	74201	24435	0.0999201	1.89725	2323	711	74222	24414
Irf5_secondary	Irf5_secondary.pfm	0.000111497	-8.78388	707	2842	22353	76283	0.0198194	-5.24142	586	2232	22353	76283	0.0782177	3.63522	728	2306	22317	76319
CDP CR1|CDP CR3+HD	V$CDPCR1_01|V$CDPCR3HD_01.pfm	0.000308036	-9.15603	566	2983	18058	80578	0.824023	0.468663	520	2298	18039	80597	1.58406e-13	15.8711	720	2314	18039	80597
Meis1_2335.1|Mrg1_2246.2|Pknox1_2364.2	Meis1_2335.1|Mrg1_2246.2|Pknox1_2364.2.pfm	0.0012355	-9.32501	439	3110	14087	84549	0.0435296	5.17701	441	2377	14087	84549	3.2479e-06	11.6021	527	2507	14087	84549
Zfp410_primary	Zfp410_primary.pfm	0.000577191	-9.45392	480	3069	15417	83219	0.197644	3.19436	466	2352	15417	83219	0.00821049	-7.20975	421	2613	15417	83219
SPI1|FEV	MA0080.2|MA0156.1.pfm	3.6263e-08	-9.45742	1245	2304	39125	59511	0.984423	-0.0788469	1117	1701	39125	59511	0.895107	0.178408	1207	1827	39125	59511
TFIIA	V$TFIIA_Q6.pfm	2.1474e-08	-9.53981	1262	2287	39679	58957	7.98444e-06	-7.55705	1016	1802	39679	58957	9.8866e-05	-6.53828	1114	1920	39679	58957
AREB6	V$AREB6_04.pfm	1.95855e-16	-9.6011	3154	395	91521	7115	0.579771	-0.622788	2607	211	91521	7115	1.56575e-10	6.19616	2902	132	91521	7115
Sp100_primary	Sp100_primary.pfm	0.0108242	-9.68448	259	3290	8393	90243	1.1089e-05	-17.2785	177	2641	8427	90209	0.488551	-2.66033	248	2786	8427	90209
HSF	V$HSF_Q6.pfm	0.0693413	-9.74784	137	3412	4452	94184	0.181375	-7.14243	112	2706	4452	94184	0.329473	4.18059	148	2886	4452	94184
AREB6	V$AREB6_01.pfm	2.00966e-06	-9.96557	826	2723	26470	72166	0.50411	1.2395	772	2046	26470	72166	0.0186732	-4.81849	756	2278	26470	72166
RUNX1|AML|AML-1a|AML1	MA0002.2|V$AML_Q6|V$AML1_01|V$AML1_Q6.pfm	3.30928e-09	-10.1061	1251	2298	39625	59011	0.572021	-0.947598	1116	1702	39588	59048	0.440813	-1.30128	1197	1837	39616	59020
Ik-1|Ik-2	V$IK1_01|V$IK2_01.pfm	5.7187e-11	-10.1265	1548	2001	48545	50091	0.0468836	-2.98121	1333	1485	48545	50091	0.19062	1.85511	1530	1504	48545	50091
GATA-1	V$GATA1_03.pfm	4.69443e-07	-10.3755	855	2694	27531	71105	0.551157	-1.21784	773	2045	27571	71065	3.97592e-07	9.18559	977	2057	27558	71078
Ik-3	V$IK3_01.pfm	0.000297166	-10.8406	403	3146	13249	85387	0.6537	-1.4563	369	2449	13232	85404	0.58809	-1.7034	395	2639	13200	85436
Nr2e3	MA0164.1.pfm	1.68324e-17	-11.507	2084	1465	64835	33801	0.0910092	-2.17059	1809	1009	64835	33801	1.2824e-06	5.81827	2122	912	64835	33801
TGIF	V$TGIF_01.pfm	7.35307e-08	-11.8641	738	2811	24360	74276	0.00156881	6.16426	773	2045	24449	74187	1.21508e-09	11.5255	902	2132	24449	74187
Osf2|IRC900814_primary	V$OSF2_Q6|IRC900814_primary.pfm	3.05489e-06	-12.1815	523	3026	17478	81158	0.49927	-1.76489	485	2333	17478	81158	0.0318443	4.97259	584	2450	17478	81158
TCF11	V$TCF11_01.pfm	3.14735e-21	-12.2297	2328	1221	71971	26665	2.4171e-05	4.81568	2156	662	71971	26665	5.35595e-26	11.4125	2466	568	71971	26665
RORA_1|RORalpha1	MA0071.1|V$RORA1_01.pfm	2.67607e-07	-12.3829	616	2933	20577	78059	5.29518e-05	8.47391	677	2141	20545	78091	1.09623e-16	16.6407	828	2206	20577	78059
Lmo2 complex	V$LMO2COM_02.pfm	1.05053e-14	-12.39	1428	2121	46167	52469	8.1437e-11	-10.3336	1145	1673	46167	52469	0.0147495	-3.7561	1352	1682	46178	52458
Pax6|Pax-6	MA0069.1|V$PAX6_01.pfm	0.0677699	-13.8774	70	3479	2432	96204	0.901333	-1.68377	67	2751	2402	96234	0.0663657	10.5393	91	2943	2435	96201
ELF5	MA0136.1.pfm	1.25406e-27	-14.0243	2384	1165	74433	24203	1.12203e-05	-5.37489	2023	795	74433	24203	0.177459	-1.61552	2257	777	74433	24203
TCF11:MafG	V$TCF11MAFG_01.pfm	0.0962775	-14.168	56	3493	1953	96683	0.113399	10.0483	67	2751	1929	96707	0.000218764	22.9529	91	2943	1951	96685
Hdx_3845.3	Hdx_3845.3.pfm	1.53392e-13	-14.4059	940	2609	31851	66785	0.0453813	3.45974	961	1857	31864	66772	1.7996e-71	26.9935	1463	1571	31851	66785
RP58	V$RP58_01.pfm	4.87132e-06	-14.4353	353	3196	12286	86350	0.284779	2.91139	370	2448	12286	86350	0.0239702	6.1453	420	2614	12286	86350
Sox14_secondary	Sox14_secondary.pfm	1.11388e-14	-14.4834	1020	2529	34464	64172	0.00727649	4.44955	1054	1764	34464	64172	3.0055e-29	17.2807	1365	1669	34464	64172
PPARG	MA0066.1.pfm	0.674091	-14.5055	11	3538	374	98262	0.552903	6.9126	14	2804	414	98222	0.25133	14.5252	17	3017	411	98225
Pax	V$PAX_Q6.pfm	2.87653e-07	-14.6109	437	3112	15196	83440	0.00940012	-7.15904	384	2434	15196	83440	0.00254153	-8.36494	407	2627	15196	83440
Hbp1_secondary	Hbp1_secondary.pfm	4.33082e-11	-15.0724	675	2874	23374	75262	8.28629e-06	-10.0034	567	2251	23374	75262	5.69216e-07	9.77963	840	2194	23374	75262
GATA-1	V$GATA1_02.pfm	2.83615e-27	-15.0978	1955	1594	63221	35415	3.72079e-14	-10.3294	1608	1210	63221	35415	0.106663	-2.11083	1901	1133	63221	35415
STAT1|STATx	MA0137.2|V$STAT_01.pfm	2.56919e-14	-16.1033	791	2758	27622	71014	0.00526385	-5.62252	721	2097	27591	71045	0.524526	-1.32263	833	2201	27622	71014
GFI1B	V$GFI1B_01.pfm	0.00013772	-16.2476	194	3355	6992	91644	0.599569	-2.36543	189	2629	6888	91748	7.58357e-06	15.4141	282	2752	6992	91644
STAT	V$STAT_Q6.pfm	3.39034e-31	-16.2828	1946	1603	63623	35013	1.23476e-18	-12.1281	1587	1231	63623	35013	8.9962e-14	-10.1026	1755	1279	63623	35013
SRF	V$SRF_C.pfm	0.00180457	-16.5358	128	3421	4645	93991	0.0221404	-11.8932	109	2709	4726	93910	0.762755	1.14112	149	2885	4731	93905
COMP1	V$COMP1_01.pfm	0.00100042	-16.7801	137	3412	4990	93646	0.965368	-0.0886755	144	2674	5031	93605	0.00127547	13.1404	195	2839	5013	93623
Eomes_primary	Eomes_primary.pfm	5.44205e-07	-17.5811	283	3266	10373	88263	0.827451	0.592209	300	2518	10373	88263	0.0117392	7.4309	363	2671	10373	88263
Sox17	MA0078.1.pfm	5.89193e-33	-17.6043	1736	1813	58258	40378	0.876497	0.20345	1669	1149	58258	40378	3.11585e-21	11.5244	2049	985	58258	40378
BLIMP1	V$BLIMP1_Q6.pfm	1.29217e-08	-18.8956	313	3236	11688	86948	0.00369573	-9.25766	284	2534	11688	86948	0.376401	-2.84309	343	2691	11688	86948
GR	V$GRE_C.pfm	7.59338e-06	-19.9525	175	3374	6695	91941	0.0745899	6.55328	216	2602	6695	91941	1.24114e-06	17.0711	275	2759	6621	92015
STAT5A (homotetramer)	V$STAT5A_02.pfm	0.291356	-20.922	14	3535	535	98101	0.884035	-8.04752	11	2807	429	98207	0.290539	11.9731	19	3015	483	98153
AR|PR|PR	V$AR_01|V$PR_01|V$PR_02.pfm	0.00048311	-21.2598	94	3455	3685	94951	0.0236744	10.7807	129	2689	3685	94951	0.000893576	15.7418	148	2886	3624	95012
RORA_2|RORalpha2	MA0072.1|V$RORA2_01.pfm	1.25366e-07	-22.3944	189	3360	7508	91128	0.00556413	9.42553	254	2564	7481	91155	2.84793e-14	24.2714	351	2683	7481	91155
ELF-1	V$ELF1_Q6.pfm	1.50843e-23	-22.4883	683	2866	26181	72455	1.48848e-06	-10.1989	635	2183	26181	72455	0.465049	-1.51897	787	2247	26181	72455
Nkx2-2_2823.1	Nkx2-2_2823.1.pfm	2.0757e-15	-23.11	401	3148	15855	82781	0.00251276	-8.16488	394	2424	15857	82779	0.041899	-5.43949	446	2588	15855	82781
SRF|SRF|SRF	V$SRF_Q6|V$SRF_Q4|V$SRF_Q5_01.pfm	1.22188e-07	-23.9845	165	3384	6731	91905	6.414e-05	-17.6977	140	2678	6731	91905	0.272236	-4.74693	191	2843	6731	91905
PR, GR	V$PR_Q2.pfm	5.44716e-70	-24.0829	2211	1338	74891	23745	2.98132e-05	-5.07846	2042	776	74891	23745	9.17472e-13	7.8072	2470	564	74891	23745
HMG IY	V$HMGIY_Q6.pfm	1.81632e-70	-24.2662	2183	1366	74251	24385	1.39253e-10	-7.98368	1969	849	74251	24385	7.85688e-33	12.5385	2558	476	74251	24385
SRF	MA0083.1.pfm	0.0118685	-24.3244	39	3510	1604	97032	0.00561352	-26.7143	31	2787	1756	96880	0.11874	-14.4114	41	2993	1708	96928
Irf3_primary	Irf3_primary.pfm	7.65739e-32	-24.8817	771	2778	30270	68366	3.18395e-13	-14.6727	690	2128	30361	68275	6.05658e-05	7.00101	1039	1995	30375	68261
IRF2	MA0051.1.pfm	6.8232e-05	-24.9118	87	3462	3618	95018	0.475045	-4.52381	95	2723	3597	95039	0.00458641	13.4875	142	2892	3618	95018
T	MA0009.1.pfm	6.40288e-05	-25.2151	86	3463	3594	95042	0.959331	-0.094375	103	2715	3594	95042	0.0856137	8.43454	129	2905	3594	95042
Freac-4	V$FREAC4_01.pfm	2.47021e-09	-25.2324	188	3361	7807	90829	0.523852	-2.67596	213	2605	7807	90829	1.2888e-25	31.4154	413	2621	7807	90829
STAT5A (homodimer)	V$STAT5A_01.pfm	1.21202e-16	-25.719	347	3202	14321	84315	2.24595e-11	-20.319	290	2528	14411	84225	0.676169	-1.29957	434	2600	14404	84232
Nkx3-2|Nkx2-5	MA0122.1|V$NKX25_01.pfm	2.13649e-63	-25.8189	1600	1949	58552	40084	1.88484e-06	-6.59243	1546	1272	58552	40084	0.0267777	2.853	1862	1172	58552	40084
Gfi	MA0038.1.pfm	1.25745e-81	-26.2821	2193	1356	75442	23194	2.53973e-12	-8.71177	1991	827	75442	23194	2.5418e-49	14.9812	2648	386	75442	23194
PAX6	V$PAX6_Q2.pfm	1.95007e-06	-26.4965	109	3440	4644	93992	0.033148	-11.2013	108	2710	4624	94012	1.70624e-05	-23.8791	94	2940	4632	94004
Dmbx1_2277.1	Dmbx1_2277.1.pfm	1.08193e-58	-26.8718	1320	2229	50237	48399	2.25185e-19	-14.059	1193	1625	50237	48399	0.000645963	4.70255	1641	1393	50237	48399
NFATC2	MA0152.1.pfm	4.24981e-68	-27.7632	1470	2079	55516	43120	1.46995e-19	-13.3993	1343	1475	55516	43120	0.539802	0.817994	1725	1309	55516	43120
TCF-4	V$TCF4_Q5.pfm	5.42621e-72	-28.4181	1492	2057	56542	42094	3.15902e-23	-14.6914	1349	1469	56542	42094	0.000258419	4.72717	1840	1194	56542	42094
Rhox11_1765.2|Rhox11_2205.1	Rhox11_1765.2|Rhox11_2205.1.pfm	1.30949e-35	-28.4989	648	2901	26984	71652	0.00129079	-6.59276	694	2124	26984	71652	1.90064e-05	7.87246	938	2096	26984	71652
Nkx3-1_secondary	Nkx3-1_secondary.pfm	3.54719e-72	-28.7274	1457	2092	55594	43042	3.89314e-21	-14.0066	1335	1483	55594	43042	0.00230678	-4.27911	1625	1409	55594	43042
PBX	V$PBX_Q3.pfm	4.45602e-53	-28.7686	1000	2549	40203	58433	1.4756e-07	-8.90643	1010	1808	40203	58433	0.910404	-0.23916	1233	1801	40203	58433
SRF	V$SRF_01.pfm	0.569368	-28.8094	5	3544	207	98429	0.0735919	-76.6315	2	2816	239	98397	0.424206	-32.1041	4	3030	210	98426
NR3C1	MA0113.1.pfm	1.00652e-18	-28.9012	308	3241	13372	85264	0.000176554	-11.2325	314	2504	13357	85279	0.00709544	7.02701	462	2572	13325	85311
Crx_3485.1|Obox3_3439.1|Pitx3_3497.2	Crx_3485.1|Obox3_3439.1|Pitx3_3497.2.pfm	9.22104e-12	-29.3909	177	3372	7846	90790	8.72208e-07	-20.4188	157	2661	7910	90726	0.0449659	-7.86741	213	2821	7923	90713
FOXO1|FOXO4|Foxj3_secondary	V$FOXO1_01|V$FOXO4_01|Foxj3_secondary.pfm	8.76898e-72	-29.4112	1368	2181	53079	45557	6.70914e-05	-5.76854	1409	1409	53079	45557	4.03456e-49	17.9866	2038	996	53079	45557
SOX9|SOX-9|Sox11_primary|Sox30_primary|Sox4_primary	MA0077.1|V$SOX9_B1|Sox11_primary|Sox30_primary|Sox4_primary.pfm	2.06835e-57	-30.7506	943	2606	39028	59608	1.59172e-07	-8.99259	978	1840	39028	59608	2.97753e-33	17.3413	1533	1501	39028	59608
LEF1|LEF1	V$LEF1_Q2|V$LEF1_Q2_01.pfm	2.93068e-91	-30.7641	1680	1869	63464	35172	5.31405e-11	-8.84346	1642	1176	63464	35172	1.5941e-19	10.5898	2190	844	63464	35172
Cutl1_3494.1	Cutl1_3494.1.pfm	4.95121e-12	-30.8418	163	3386	7399	91237	0.0411468	-8.28557	181	2637	7342	91294	9.73723e-13	22.9258	341	2693	7436	91200
Spdef_secondary	Spdef_secondary.pfm	2.05212e-39	-31.0388	602	2947	26048	72588	1.97992e-15	-17.5915	561	2257	26048	72588	0.0251846	-4.62804	746	2288	26048	72588
Six6_primary|Six1_0935.2|Six6_2267.5	Six6_primary|Six1_0935.2|Six6_2267.5.pfm	7.90809e-25	-31.1385	359	3190	16010	82626	8.44923e-08	-14.9761	354	2464	16010	82626	0.0162685	-6.43735	443	2591	16010	82626
GCNF	V$GCNF_01.pfm	0.00309726	-31.483	31	3518	1430	97206	0.422034	-8.68703	35	2783	1422	97214	0.106871	11.7055	55	2979	1434	97202
GR	V$GR_01.pfm	2.05643e-15	-31.8869	201	3348	9232	89404	0.921667	-0.538724	262	2556	9242	89394	0.00959233	8.06189	327	2707	9234	89402
Hoxb6_3428.2	Hoxb6_3428.2.pfm	1.0429e-14	-32.3036	186	3363	8612	90024	0.000122851	-14.814	189	2629	8610	90026	3.02902e-14	22.6927	395	2639	8673	89963
LEF1TCF1|Lef1_primary|Tcf7l2_primary	V$LEF1TCF1_Q4|Lef1_primary|Tcf7l2_primary.pfm	1.45602e-32	-32.404	443	3106	19906	78730	9.41353e-11	-16.3092	433	2385	19906	78730	9.6709e-06	9.37855	714	2320	19925	78711
PITX2	V$PITX2_Q2.pfm	6.20572e-34	-32.4198	463	3086	20757	77879	6.35898e-12	-17.0016	447	2371	20757	77879	0.168081	2.94036	670	2364	20757	77879
Nkx3-1_primary|Bapx1_2343.1	Nkx3-1_primary|Bapx1_2343.1.pfm	4.41931e-41	-32.7693	559	2990	24873	73763	2.5692e-12	-15.7074	551	2267	24873	73763	0.218235	-2.59766	735	2299	24873	73763
Mafk_secondary	Mafk_secondary.pfm	6.58509e-30	-33.1958	382	3167	17490	81146	1.35882e-07	-13.9888	394	2424	17485	81151	1.96201e-27	22.7997	782	2252	17490	81146
IPF1	V$IPF1_Q4_01.pfm	1.58289e-101	-33.5072	1561	1988	61223	37413	3.69003e-22	-13.6877	1493	1325	61223	37413	5.80055e-25	12.1697	2158	876	61223	37413
HOXA5	MA0158.1.pfm	9.61137e-132	-33.6637	2465	1084	84683	13953	5.54109e-30	-14.0303	2191	627	84683	13953	2.19253e-23	9.82297	2786	248	84683	13953
Mafb_primary|Mafk_primary	Mafb_primary|Mafk_primary.pfm	3.40966e-14	-33.6831	163	3386	7728	90908	0.0504308	-7.76413	193	2625	7754	90882	3.12626e-08	17.9239	326	2708	7751	90885
Zbtb12_secondary	Zbtb12_secondary.pfm	4.42386e-26	-34.0678	311	3238	14551	84085	2.64795e-05	-12.2312	334	2484	14439	84197	0.00429885	7.15437	505	2529	14548	84088
ISRE	V$ISRE_01.pfm	8.78667e-05	-34.4291	44	3505	2132	96504	0.0160431	-19.7823	44	2774	2201	96435	0.00185564	18.64	95	2939	2200	96436
Ehf_secondary	Ehf_secondary.pfm	6.69665e-16	-34.7766	173	3376	8329	90307	0.00179922	-12.1826	189	2629	8218	90418	0.465672	2.38515	267	2767	8312	90324
IRF-1|IRF-2	V$IRF1_01|V$IRF2_01.pfm	8.43613e-07	-35.028	64	3485	3130	95506	0.000343555	-24.3482	59	2759	3209	95427	0.038059	10.6987	120	2914	3209	95427
HNF3	V$HNF3_Q6_01.pfm	1.40514e-139	-35.3421	2285	1264	81345	17291	1.19575e-16	-10.075	2147	671	81345	17291	1.86197e-26	10.719	2715	319	81345	17291
Nkx2-4_3074.1|Nkx2-5_3436.1|Nkx2-6_3437.1|Titf1_1722.2	Nkx2-4_3074.1|Nkx2-5_3436.1|Nkx2-6_3437.1|Titf1_1722.2.pfm	1.54234e-14	-35.9194	146	3403	7177	91459	1.77406e-05	-18.5033	147	2671	7166	91470	0.886637	-0.858081	216	2818	7112	91524
SOX	V$SOX_Q6.pfm	8.91563e-22	-36.5756	219	3330	10763	87873	1.56977e-13	-27.1515	191	2627	10763	87873	0.679145	1.12259	338	2696	10763	87873
FOXP3	V$FOXP3_Q4.pfm	1.41338e-18	-37.4613	174	3375	8721	89915	0.00169489	-11.8108	202	2616	8721	89915	0.135815	4.79171	292	2742	8721	89915
Gbx2_3110.1|Isx_3445.1|Lhx8_2247.2|Og2x_3719.1|Pax4_3989.2|Pax7_3783.1	Gbx2_3110.1|Isx_3445.1|Lhx8_2247.2|Og2x_3719.1|Pax4_3989.2|Pax7_3783.1.pfm	1.01587e-33	-37.6172	332	3217	16286	82350	3.56106e-13	-20.8522	326	2492	16286	82350	5.09858e-06	10.634	598	2436	16286	82350
IRC900814_secondary	IRC900814_secondary.pfm	1.9332e-14	-37.6896	130	3419	6579	92057	5.40453e-07	-23.201	124	2694	6579	92057	0.301332	3.84527	217	2817	6579	92057
HNF-3	V$HNF3_Q6.pfm	4.17131e-126	-38.0789	1516	2033	62027	36609	3.67161e-18	-12.0983	1543	1275	62027	36609	1.60459e-39	15.0667	2254	780	62027	36609
Tal1::Gata1	MA0140.1.pfm	6.28047e-41	-38.1181	398	3151	19458	79178	1.09951e-13	-19.2516	403	2415	19473	79163	0.354636	2.04509	620	2414	19481	79155
SRF	V$SRF_Q5_02.pfm	8.62753e-26	-38.3926	237	3312	11929	86707	1.58583e-14	-26.6194	216	2602	12023	86613	0.000182156	-11.94	300	2734	11929	86707
HOXA4	V$HOXA4_Q2.pfm	9.32221e-131	-38.6777	1533	2016	62831	35805	1.07536e-32	-16.9983	1481	1337	62831	35805	4.49879e-20	10.7842	2175	859	62831	35805
IRF-7	V$IRF7_01.pfm	3.17867e-23	-39.4221	199	3350	10229	88407	2.79542e-11	-24.8139	189	2629	10240	88396	0.261695	3.40025	331	2703	10134	88502
Zbtb12_primary	Zbtb12_primary.pfm	5.26657e-12	-39.9298	94	3455	4947	93689	2.5039e-05	-22.3878	95	2723	4980	93656	0.0346151	-10.7337	127	2907	4973	93663
Foxk1_secondary	Foxk1_secondary.pfm	1.50288e-60	-39.9676	554	2995	27047	71589	1.12938e-11	-14.5061	613	2205	27047	71589	8.98209e-11	11.6813	997	2037	27047	71589
Crx|Gsc_2327.3	V$CRX_Q4|Gsc_2327.3.pfm	7.41233e-55	-40.2496	488	3061	24179	74457	1.14501e-34	-30.6229	421	2397	24179	74457	0.427819	-1.74826	724	2310	24179	74457
FOXM1	V$FOXM1_01.pfm	4.67141e-171	-40.6209	2104	1445	79100	19536	1.32978e-37	-16.4756	1969	849	79100	19536	2.44377e-14	8.04628	2597	437	79100	19536
CDP	V$CDP_01.pfm	9.7266e-05	-40.765	30	3519	1605	97031	0.00131666	-33.3024	25	2793	1592	97044	0.000492162	23.6211	76	2958	1607	97029
Obox2_3438.2	Obox2_3438.2.pfm	1.33961e-17	-40.8974	136	3413	7218	91418	1.00891e-12	-33.6315	113	2705	7191	91445	0.0325676	-8.84137	189	2845	7153	91483
Hmbox1_2674.1	Hmbox1_2674.1.pfm	2.56065e-50	-41.0347	425	3124	21506	77130	2.94612e-20	-23.3263	418	2400	21506	77130	4.08139e-05	8.4433	758	2276	21506	77130
Gata1|GATA-X|Gata5_primary|Gata6_primary	MA0035.2|V$GATA_C|Gata5_primary|Gata6_primary.pfm	3.46615e-66	-41.1248	574	2975	28329	70307	1.5903e-15	-16.8514	620	2198	28329	70307	0.0214213	4.21161	930	2104	28329	70307
Tcf1_primary|Tcf1_2666.2|Tcf2_0913.2	Tcf1_primary|Tcf1_2666.2|Tcf2_0913.2.pfm	1.85633e-43	-41.1342	360	3189	18450	80186	5.39366e-13	-19.2616	381	2437	18450	80186	5.364e-14	15.9841	739	2295	18495	80141
Gata3_secondary	Gata3_secondary.pfm	8.29709e-48	-41.5949	390	3159	20005	78631	1.82151e-08	-13.9645	452	2366	19980	78656	0.130743	3.27354	650	2384	20024	78612
Evx2_2645.3|Lhx2_0953.2|Lhx6_3432.1|Msx2_3449.1|Phox2a_3947.1	Evx2_2645.3|Lhx2_0953.2|Lhx6_3432.1|Msx2_3449.1|Phox2a_3947.1.pfm	2.84541e-10	-41.6722	72	3477	3903	94733	1.10676e-05	-27.476	68	2750	3910	94726	0.399026	3.78376	131	2903	3966	94670
GATA-4	V$GATA4_Q3.pfm	1.78545e-96	-42.0226	845	2704	40150	58486	1.71123e-19	-15.9488	912	1906	40188	58448	0.367926	-1.50098	1211	1823	40188	58448
PBX1|Pbx1b|Lef1_secondary	MA0070.1|V$PBX1_02|Lef1_secondary.pfm	2.33235e-21	-42.1917	157	3392	8465	90171	9.42214e-07	-19.4777	171	2647	8465	90171	6.27989e-09	17.9985	356	2678	8465	90171
Barx1_2877.1|Barx2_3447.2|Hlxb9_3422.1	Barx1_2877.1|Barx2_3447.2|Hlxb9_3422.1.pfm	2.03132e-54	-42.2151	435	3114	22314	76322	2.28726e-23	-25.0729	419	2399	22144	76492	4.38537e-20	17.5743	909	2125	22327	76309
SRY|SRY	MA0084.1|V$SRY_02.pfm	2.07519e-151	-42.8055	1447	2102	62061	36575	5.44053e-27	-15.2674	1489	1329	62061	36575	1.03103e-65	18.9685	2354	680	62061	36575
Tcf3_primary	Tcf3_primary.pfm	1.17691e-77	-43.7616	597	2952	30286	68350	7.58879e-13	-14.4436	690	2128	30258	68378	8.41104e-11	11.0954	1101	1933	30258	68378
Bcl6b_primary	Bcl6b_primary.pfm	4.22946e-30	-43.7658	210	3339	11474	87162	1.29136e-22	-37.245	171	2647	11423	87213	0.0382373	-6.58371	316	2718	11477	87159
FOXO3|FOXD1	MA0157.1|MA0031.1.pfm	1.8373e-81	-44.1854	617	2932	31336	67300	2.46831e-16	-16.4498	694	2124	31336	67300	8.48802e-18	14.1604	1192	1842	31336	67300
MRF-2	V$MRF2_01.pfm	8.93633e-31	-45.2333	200	3349	11181	87455	4.82094e-16	-29.7345	190	2628	11181	87455	0.322676	-3.23943	326	2708	11185	87451
GATA-1	V$GATA1_05.pfm	1.01482e-81	-45.6946	574	2975	29927	68709	6.09497e-14	-15.3026	673	2145	29927	68709	5.22397e-10	10.705	1083	1951	29927	68709
Foxa2	MA0047.2.pfm	1.25386e-77	-46.0673	531	3018	28054	70582	1.98689e-14	-16.218	620	2198	28061	70575	4.69748e-18	15.0155	1087	1947	28061	70575
Hoxb5_3122.2	Hoxb5_3122.2.pfm	1.58581e-17	-46.151	104	3445	6004	92632	8.67121e-10	-31.2783	98	2720	6004	92632	0.0153377	9.29693	218	2816	6004	92632
Tcf7_primary	Tcf7_primary.pfm	1.66041e-48	-46.4035	310	3239	17222	81414	1.28693e-09	-16.5318	371	2447	17197	81439	8.59165e-07	11.1424	637	2397	17222	81414
IRF1|IRF	MA0050.1|V$IRF_Q6_01.pfm	5.9907e-42	-46.7845	260	3289	14673	83963	9.54772e-16	-24.9095	273	2545	14663	83973	0.51745	1.60326	464	2570	14669	83967
HNF-1	V$HNF1_C.pfm	5.87162e-19	-46.9724	109	3440	6364	92272	1.89856e-07	-24.5662	119	2699	6470	92166	2.06408e-17	28.6333	323	2711	6372	92264
IRF1	V$IRF1_Q6.pfm	7.55548e-207	-47.1235	1832	1717	74874	23762	9.55472e-62	-22.6534	1736	1082	74874	23762	0.235683	1.37567	2332	702	74874	23762
Tcf7l2_secondary	Tcf7l2_secondary.pfm	1.20728e-73	-47.1964	474	3075	25694	72942	5.20445e-27	-25.173	490	2328	25694	72942	9.03577e-18	15.5203	1007	2027	25694	72942
Evi-1|Evi-1	V$EVI1_06|V$EVI1_02.pfm	7.25708e-23	-48.1017	127	3422	7512	91124	3.1925e-16	-38.8581	108	2710	7512	91124	0.532059	2.05248	240	2794	7512	91124
Pbx1_3203.1	Pbx1_3203.1.pfm	2.49508e-72	-49.0987	424	3125	23791	74845	1.77596e-16	-19.3194	496	2322	23786	74850	2.19214e-06	9.21227	847	2187	23791	74845
FOXJ2	V$FOXJ2_01.pfm	9.30056e-117	-49.8638	710	2839	37659	60977	4.26953e-26	-19.6897	805	2013	37659	60977	7.94463e-18	13.0129	1395	1639	37659	60977
Pdx1	MA0132.1.pfm	7.21075e-200	-50.1146	1428	2121	64681	33955	5.39801e-77	-27.9424	1359	1459	64681	33955	5.22262e-15	9.16392	2194	840	64681	33955
FOXA1|HNF-3alpha	MA0148.1|V$HNF3ALPHA_Q6.pfm	7.80234e-165	-50.423	1065	2484	52407	46229	4.87033e-45	-22.6894	1119	1699	52407	46229	3.16083e-11	8.71525	1797	1237	52411	46225
Nkx2-5	MA0063.1.pfm	5.59186e-236	-50.6237	1877	1672	77265	21371	3.30123e-61	-22.1988	1818	1000	77265	21371	1.19274e-19	9.55665	2577	457	77265	21371
ICSBP	V$ICSBP_Q6.pfm	7.53275e-35	-50.683	178	3371	10802	87834	1.29134e-13	-27.2619	191	2627	10783	87853	0.0337271	6.14262	369	2665	10783	87853
AR	V$AR_Q2.pfm	4.81885e-20	-51.2117	96	3453	5983	92653	4.00589e-05	-19.6319	120	2698	5979	92657	0.11394	6.02604	205	2829	5979	92657
Hoxc10_2779.2|Hoxc11_3718.2	Hoxc10_2779.2|Hoxc11_3718.2.pfm	3.05553e-40	-51.2572	203	3346	12344	86292	2.2805e-18	-30.7028	207	2611	12344	86292	0.911282	-0.497462	377	2657	12344	86292
Sox5|Sox-5|Sox15_primary|Sox7_primary	MA0087.1|V$SOX5_01|Sox15_primary|Sox7_primary.pfm	4.63061e-144	-51.5038	850	2699	44371	54265	2.23721e-33	-20.8262	949	1869	44371	54265	4.75633e-39	17.6238	1730	1304	44371	54265
Sox17_primary|Hmx1_3423.1	Sox17_primary|Hmx1_3423.1.pfm	8.42379e-63	-51.9739	319	3230	19033	79603	2.69182e-24	-28.0747	343	2475	19193	79443	4.91955e-14	15.7411	763	2271	19193	79443
Pax4	MA0068.1.pfm	0.000389008	-52.2363	15	3534	953	97683	0.0304667	-30.372	16	2802	960	97676	0.251614	-16.2105	22	3012	939	97697
CDP CR3	V$CDPCR3_01.pfm	8.43378e-08	-52.3354	32	3517	2049	96587	0.0505273	-15.7083	47	2771	2182	96454	0.380987	5.09557	74	2960	2180	96456
Otx1_2325.1	Otx1_2325.1.pfm	6.30773e-36	-53.5288	163	3386	10333	88303	2.02593e-16	-31.6738	171	2647	10425	88211	0.0765234	-5.95322	290	2744	10425	88211
Bsx_3483.2|Dlx2_2273.2|Gsh2_3990.2|Ipf1_3815.1|Meox1_2310.2|Vax1_3499.1	Bsx_3483.2|Dlx2_2273.2|Gsh2_3990.2|Ipf1_3815.1|Meox1_2310.2|Vax1_3499.1.pfm	7.11983e-60	-54.3122	274	3275	17049	81587	3.09656e-21	-27.6622	304	2514	16999	81637	8.36744e-09	12.967	652	2382	17105	81531
EWSR1-FLI1	MA0149.1.pfm	0.0651404	-54.5661	5	3544	317	98319	0.630779	-15.4526	8	2810	354	98282	0.110081	-45.1264	5	3029	338	98298
Srf_primary	Srf_primary.pfm	1.49515e-46	-54.8293	204	3345	13024	85612	6.57631e-24	-35.2126	205	2613	13158	85478	0.55088	-1.81508	393	2641	13158	85478
Foxj1_primary|Foxj3_primary	Foxj1_primary|Foxj3_primary.pfm	6.05764e-96	-55.0032	450	3099	26942	71694	6.17619e-27	-24.3831	522	2296	26942	71694	4.34704e-12	12.4439	1005	2029	26942	71694
HNF1A|HNF-1	MA0046.1|V$HNF1_01.pfm	1.17999e-24	-55.0365	102	3447	6711	91925	1.32832e-16	-42.6953	90	2728	6700	91936	6.45613e-10	21.1645	298	2736	6686	91950
Emx2_3420.1|Evx1_3952.2|Prrx2_3072.1	Emx2_3420.1|Evx1_3952.2|Prrx2_3072.1.pfm	5.05955e-36	-55.124	153	3396	9944	88692	2.55729e-17	-34.0613	155	2663	9860	88776	0.221518	3.69552	327	2707	9960	88676
Sox2	MA0143.1.pfm	3.49613e-13	-55.5125	51	3498	3419	95217	1.09335e-05	-28.9606	60	2758	3544	95092	0.293416	5.09353	117	2917	3458	95178
Hoxa11_2218.1|Hoxa13_3126.1|Hoxc12_3480.1|Hoxc13_3127.1|Hoxd11_3873.1|Hoxd12_3481.1	Hoxa11_2218.1|Hoxa13_3126.1|Hoxc12_3480.1|Hoxc13_3127.1|Hoxd11_3873.1|Hoxd12_3481.1.pfm	2.18278e-48	-56.1267	202	3347	13132	85504	3.10762e-29	-40.5752	187	2631	13124	85512	2.76893e-05	-12.7872	326	2708	13132	85504
FOXO4	V$FOXO4_02.pfm	7.33268e-47	-56.2999	194	3355	12670	85966	5.35186e-23	-35.1874	197	2621	12660	85976	0.349402	2.48533	407	2627	12670	85966
CDP	V$CDP_02.pfm	3.25269e-33	-56.8142	131	3418	8771	89865	9.30076e-09	-22.8599	167	2651	8771	89865	2.82604e-09	18.0532	369	2665	8771	89865
GATA-1	V$GATA1_04.pfm	2.60796e-254	-57.1752	1448	2101	68168	30468	9.4856e-75	-26.6578	1475	1343	68168	30468	0.0898475	2.04324	2141	893	68168	30468
Gata5_secondary	Gata5_secondary.pfm	9.7816e-102	-57.7833	429	3120	26686	71950	8.25068e-44	-33.4909	448	2370	26686	71950	0.000957515	-6.81895	739	2295	26686	71950
Helios A	V$HELIOSA_02.pfm	5.49083e-144	-57.9045	641	2908	37589	61047	9.39479e-44	-27.1006	721	2097	37589	61047	0.0745171	2.86376	1205	1829	37589	61047
Isgf3g_primary	Isgf3g_primary.pfm	1.7488e-21	-58.5333	77	3472	5363	93273	5.57422e-13	-41.747	72	2746	5298	93338	0.329812	3.8558	177	2857	5360	93276
OCT-x	V$OCT_C.pfm	2.28947e-38	-58.838	142	3407	9748	88888	6.81232e-14	-29.388	166	2652	9748	88888	0.497131	2.02471	311	2723	9748	88888
Hoxa2_3079.1|Hoxa6_1040.1	Hoxa2_3079.1|Hoxa6_1040.1.pfm	1.34864e-11	-58.9172	39	3510	2755	95881	8.04609e-06	-35.8996	40	2778	2673	95963	0.695987	-3.20389	81	2953	2772	95864
Freac-3	V$FREAC3_01.pfm	2.41934e-34	-58.9737	125	3424	8641	89995	2.29623e-19	-40.1477	122	2696	8641	89995	0.00314726	9.38905	315	2719	8689	89947
Zfp187_primary	Zfp187_primary.pfm	1.42446e-24	-59.1214	87	3462	6094	92542	4.48445e-09	-29.104	104	2714	6131	92505	0.61996	1.75383	195	2839	6131	92505
FOXF2|Freac-2|Foxk1_primary|Foxl1_primary	MA0030.1|V$FREAC2_01|Foxk1_primary|Foxl1_primary.pfm	9.18907e-56	-59.221	209	3340	14131	84505	2.59572e-19	-29.2056	243	2575	14059	84577	4.27374e-06	11.4645	527	2507	14120	84516
Dobox4_3956.2	Dobox4_3956.2.pfm	2.3382e-28	-59.2396	101	3448	7058	91578	8.75437e-18	-43.5468	93	2725	7016	91620	7.79337e-11	-29.8387	131	2903	7115	91521
C/EBPgamma	V$CEBPGAMMA_Q6.pfm	7.77453e-152	-59.5183	640	2909	38154	60482	1.32888e-59	-32.635	677	2141	38154	60482	6.84491e-10	9.46332	1343	1691	38154	60482
Hbp1_primary	Hbp1_primary.pfm	5.62961e-69	-59.5292	260	3289	17375	81261	1.19656e-19	-25.9586	320	2498	17375	81261	0.000198931	8.47364	615	2419	17375	81261
Tst-1	V$TST1_01.pfm	4.50261e-299	-59.7815	1718	1831	76476	22160	5.69527e-101	-30.286	1669	1149	76476	22160	1.84434e-08	6.16356	2481	553	76476	22160
FOXO1|FOXO3	V$FOXO1_02|V$FOXO3_01.pfm	2.80043e-63	-59.9702	233	3316	15791	82845	1.57646e-26	-33.5821	255	2563	15791	82845	0.0371408	5.07186	529	2505	15791	82845
Octamer	V$OCT_Q6.pfm	5.46852e-162	-60.0416	679	2870	40226	58410	2.21973e-44	-26.2227	788	2030	40226	58410	0.000422793	5.41143	1335	1699	40226	58410
IPF1	V$IPF1_Q4.pfm	1.15235e-88	-60.043	337	3212	22132	76504	6.1113e-44	-37.8789	341	2477	22132	76504	0.690892	0.819167	690	2344	22124	76512
Sox13_primary|Sox5_primary	Sox13_primary|Sox5_primary.pfm	1.08966e-130	-60.1955	521	3028	32401	66235	8.19307e-35	-25.6512	625	2193	32401	66235	3.20924e-17	13.6958	1222	1812	32401	66235
Nkx2-2	V$NKX22_01.pfm	3.6923e-89	-60.7338	330	3219	21902	76734	1.5763e-40	-36.0683	348	2470	21961	76675	0.363106	-2.09145	652	2382	21902	76734
AFP1	V$AFP1_Q6.pfm	5.94366e-43	-60.7464	149	3400	10477	88159	3.14246e-19	-35.1441	162	2656	10477	88159	3.33232e-05	11.9437	396	2638	10477	88159
Dobox5_3493.1|Obox5_2284.1|Otx2_3441.1|Pitx1_2312.1|Pitx2_2274.3	Dobox5_3493.1|Obox5_2284.1|Otx2_3441.1|Pitx1_2312.1|Pitx2_2274.3.pfm	3.16692e-34	-60.8956	116	3433	8259	90377	1.53161e-18	-40.0914	117	2701	8289	90347	0.00702146	-10.329	214	2820	8305	90331
IRF	V$IRF_Q6.pfm	2.91231e-76	-60.9145	276	3273	18676	79960	3.5226e-45	-43.3203	261	2557	18725	79911	6.81511e-05	-10.013	489	2545	18703	79933
Foxa2_primary	Foxa2_primary.pfm	1.48052e-100	-61.7751	363	3186	24138	74498	4.27957e-41	-34.2181	397	2421	24138	74498	8.3289e-09	11.0328	884	2150	24138	74498
Gata3_primary	Gata3_primary.pfm	4.43679e-60	-61.9283	205	3344	14380	84256	1.19946e-15	-25.2094	265	2553	14318	84318	0.979164	0.0239004	443	2591	14380	84256
Lbx2_3869.2|Rax_3443.1	Lbx2_3869.2|Rax_3443.1.pfm	7.1066e-46	-61.9429	153	3396	10920	87716	1.15072e-21	-36.8993	166	2652	11039	87597	0.306126	2.95561	357	2677	11018	87618
HNF1	V$HNF1_Q6_01.pfm	3.34308e-31	-62.3059	100	3449	7298	91338	4.27894e-26	-57.6818	76	2742	7230	91406	0.00284089	10.3494	270	2764	7313	91323
Pou6f1_1731.2|Pou6f1_3733.1	Pou6f1_1731.2|Pou6f1_3733.1.pfm	6.50265e-55	-62.4744	182	3367	12957	85679	2.06339e-25	-36.9448	197	2621	13022	85614	0.231355	-3.55544	379	2655	13068	85568
HNF-6	V$HNF6_Q6.pfm	4.82793e-64	-62.6082	214	3335	15099	83537	3.69064e-34	-41.2518	214	2604	15073	83563	5.8472e-14	17.4903	622	2412	15099	83537
Obox1_3970.2|Obox6_3440.2	Obox1_3970.2|Obox6_3440.2.pfm	1.09478e-21	-62.6352	67	3482	4963	93673	4.21575e-13	-44.3216	64	2754	4926	93710	0.022421	-11.5909	125	2909	4969	93667
OTX	V$OTX_Q1.pfm	6.79405e-216	-62.7281	881	2668	50339	48297	3.34282e-72	-31.0661	958	1860	50339	48297	7.91741e-05	5.40711	1659	1375	50339	48297
CHX10|Hoxd1_3448.1|Lhx4_1719.2	V$CHX10_01|Hoxd1_3448.1|Lhx4_1719.2.pfm	3.35908e-17	-62.7622	52	3497	3875	94761	2.30467e-12	-49.5749	47	2771	3964	94672	0.398529	3.85449	131	2903	3961	94675
Hoxa1_3425.1|Hoxb3_1720.2	Hoxa1_3425.1|Hoxb3_1720.2.pfm	1.22359e-52	-63.2992	169	3380	12217	86419	4.32746e-28	-41.4454	171	2647	12217	86419	0.0656977	5.03971	412	2622	12280	86356
Nkx2-5	V$NKX25_02.pfm	1.19927e-163	-64.0598	588	2961	37259	61377	1.35838e-60	-33.466	651	2167	37259	61377	0.000144021	6.03402	1250	1784	37259	61377
Nkx1-2_3214.1	Nkx1-2_3214.1.pfm	9.51174e-61	-64.8074	187	3362	13702	84934	2.87421e-29	-39.3626	200	2618	13727	84909	0.00290041	7.66672	481	2553	13729	84907
Barhl2_3868.1	Barhl2_3868.1.pfm	6.33104e-41	-65.8955	118	3431	8992	89644	8.44744e-28	-50.9708	107	2711	9057	89579	0.000210284	11.51	338	2696	8992	89644
Hoxc9_2367.2	Hoxc9_2367.2.pfm	2.6656e-102	-66.7234	310	3239	22248	76388	2.15385e-39	-35.0387	360	2458	22320	76316	0.262154	2.28889	715	2319	22395	76241
Sox12_primary|Sox18_primary	Sox12_primary|Sox18_primary.pfm	6.04055e-179	-67.1407	586	2963	38286	60350	3.56681e-72	-36.8509	640	2178	38286	60350	6.62209e-05	6.2255	1287	1747	38286	60350
Obox5_3963.2	Obox5_3963.2.pfm	1.00613e-36	-67.3618	100	3449	7825	90811	5.69368e-33	-65.7012	73	2745	7858	90778	0.0115893	-9.87951	204	2830	7858	90778
HNF1B	MA0153.1.pfm	2.21597e-42	-67.4604	116	3433	9035	89601	6.18137e-18	-37.0007	134	2684	8987	89649	2.86711e-06	14.2792	357	2677	9057	89579
Brn-2	V$BRN2_01.pfm	1.22728e-139	-67.9272	424	3125	29583	69053	9.29491e-69	-42.3585	439	2379	29583	69053	0.067344	3.28317	957	2077	29583	69053
Freac-7	V$FREAC7_01.pfm	1.49664e-218	-68.3307	723	2826	45537	53099	1.27012e-64	-30.8018	853	1965	45537	53099	4.44548e-07	7.19244	1542	1492	45537	53099
Dlx1_1741.2|Hoxd3_1742.2	Dlx1_1741.2|Hoxd3_1742.2.pfm	6.33594e-78	-69.5494	209	3340	16130	82506	9.43646e-38	-42.1582	227	2591	16156	82480	0.000135761	8.94904	582	2452	16298	82338
Six2_2307.2|Six3_1732.2|Six6_2267.4	Six2_2307.2|Six3_1732.2|Six6_2267.4.pfm	4.13833e-09	-70.5557	20	3529	1675	96961	4.40822e-05	-45.7401	20	2798	1582	97054	0.0094362	-25.3231	33	3001	1666	96970
GZF1	V$GZF1_01.pfm	9.51531e-07	-70.8318	14	3535	1174	97462	0.00131756	-41.5891	16	2802	1174	97462	0.0100226	-31.4141	21	3013	1174	97462
Cutl1_3494.2	Cutl1_3494.2.pfm	5.30915e-49	-71.8308	118	3431	9733	88903	7.70769e-19	-36.47	146	2672	9682	88954	0.476987	-2.5499	287	2747	9733	88903
Cart1_0997.1|Hoxc4_3491.1|Hoxc5_2630.2	Cart1_0997.1|Hoxc4_3491.1|Hoxc5_2630.2.pfm	2.55956e-10	-71.9482	22	3527	1880	96756	1.10096e-12	-90.244	13	2805	2070	96566	0.69794	2.21611	66	2968	2046	96590
FOXI1|HFH-3|HFH-8	MA0042.1|V$HFH3_01|V$HFH8_01.pfm	2.72345e-222	-72.2046	645	2904	43198	55438	1.39169e-80	-36.6509	740	2078	43198	55438	0.220256	1.8425	1363	1671	43198	55438
Cdx1_2245.1|Cdx2_4272.1|Hoxb9_3413.1	Cdx1_2245.1|Cdx2_4272.1|Hoxb9_3413.1.pfm	6.72461e-140	-72.4947	365	3184	27365	71271	9.54138e-68	-44.2705	390	2428	27329	71307	0.302988	-2.09352	814	2220	27316	71320
Zfp105_primary	Zfp105_primary.pfm	5.75009e-219	-72.556	625	2924	42307	56329	1.18872e-87	-39.3046	696	2122	42307	56329	2.68843e-06	6.9495	1432	1602	42307	56329
Pbx-1	V$PBX1_01.pfm	3.77524e-267	-73.5935	785	2764	50449	48187	7.5933e-109	-40.4239	852	1966	50449	48187	1.12827e-09	8.18159	1722	1312	50449	48187
Hoxb8_3780.2|Hoxc6_3954.2	Hoxb8_3780.2|Hoxc6_3954.2.pfm	2.68004e-144	-73.7349	364	3185	27667	70969	2.09314e-64	-42.6055	402	2416	27454	71182	1.26394e-05	7.92862	962	2072	27667	70969
Sox8_primary|Sox11_secondary|Sox4_secondary	Sox8_primary|Sox11_secondary|Sox4_secondary.pfm	6.31186e-161	-74.8293	399	3150	30227	68409	3.2632e-71	-42.79	447	2371	30227	68409	0.00331442	5.1791	1006	2028	30227	68409
Nkx6-2	V$NKX62_Q2.pfm	0	-76.4208	1558	1991	77617	21019	1.18703e-128	-34.9959	1638	1180	77617	21019	5.07088e-34	12.4305	2650	384	77617	21019
Hmx2_3424.3|Hmx3_3490.2	Hmx2_3424.3|Hmx3_3490.2.pfm	7.85834e-21	-76.5261	41	3508	3720	94916	2.55867e-15	-63.0524	35	2783	3683	94953	0.0598853	8.9789	135	2899	3726	94910
En2_0952.1|Rhox6_4251.1	En2_0952.1|Rhox6_4251.1.pfm	1.26561e-72	-76.9479	154	3395	13343	85293	2.34377e-41	-52.053	157	2661	13267	85369	0.0893244	-4.96482	378	2656	13346	85290
NKX3-1|Dlx3_1030.1	MA0124.1|Dlx3_1030.1.pfm	1.69196e-219	-77.4882	534	3015	39179	59457	5.43095e-79	-38.5403	642	2176	39179	59457	0.546745	0.957088	1222	1812	39179	59457
Esx1_3124.2|Gbx1_2883.2	Esx1_3124.2|Gbx1_2883.2.pfm	3.94643e-68	-78.0562	139	3410	12299	86337	6.33015e-37	-50.271	150	2668	12370	86266	0.343558	-2.96684	362	2672	12360	86276
Barhl1_2590.2|Msx3_3206.1	Barhl1_2590.2|Msx3_3206.1.pfm	5.32178e-44	-78.927	85	3464	7809	90827	2.79663e-28	-57.9147	82	2736	7809	90827	0.00854619	-10.3149	202	2832	7840	90796
Hoxa10_2318.1|Hoxa9_2622.2	Hoxa10_2318.1|Hoxa9_2622.2.pfm	1.10964e-257	-79.1202	623	2926	44619	54017	1.3876e-120	-47.1201	668	2150	44579	54057	0.384169	-1.36592	1348	1686	44619	54017
Nkx2-3_3435.1|Nkx2-9_3082.1|Nkx3-1_2923.2	Nkx2-3_3435.1|Nkx2-9_3082.1|Nkx3-1_2923.2.pfm	3.76864e-33	-80.0097	61	3488	5751	92885	3.50115e-12	-37.2475	86	2732	5848	92788	0.391066	3.25324	191	2843	5848	92788
Nobox|Prrx2|S8|Hoxa3_primary|Dlx4_3488.2|Dlx5_3419.2|Hoxa3_2783.2|Hoxa7_2668.2|Hoxc8_3429.2|Pou2f1_3081.2|Vax2_3500.1	MA0125.1|MA0075.1|V$S8_01|Hoxa3_primary|Dlx4_3488.2|Dlx5_3419.2|Hoxa3_2783.2|Hoxa7_2668.2|Hoxc8_3429.2|Pou2f1_3081.2|Vax2_3500.1.pfm	4.88756e-235	-80.4313	532	3017	40097	58539	1.43448e-105	-46.2382	593	2225	40097	58539	0.0061637	4.22788	1309	1725	40097	58539
Pax-4	V$PAX4_04.pfm	0.00672843	-81.0023	4	3545	374	98262	0.0218718	-40.3419	10	2808	710	97926	0.23094	-19.6745	16	3018	722	97914
Irx2_0900.3|Irx3_0920.1|Irx3_2226.1|Irx4_2242.3|Irx5_2385.1	Irx2_0900.3|Irx3_0920.1|Irx3_2226.1|Irx4_2242.3|Irx5_2385.1.pfm	2.52323e-154	-81.2847	313	3236	26375	72261	4.81809e-46	-34.8564	433	2385	26375	72261	0.574118	1.03963	825	2209	26375	72261
Hoxa5_3415.1	Hoxa5_3415.1.pfm	3.49838e-102	-81.6366	195	3354	17513	81123	2.93185e-45	-45.49	234	2584	17472	81164	0.847436	-0.587402	538	2496	17644	80992
Arid5a_primary	Arid5a_primary.pfm	0	-83.2386	889	2660	58570	40066	4.59513e-112	-37.5066	1071	1747	58570	40066	6.58694e-27	12.9061	2092	942	58570	40066
ARID3A	MA0151.1.pfm	0	-83.422	1085	2464	66059	32577	2.34945e-141	-40.5735	1221	1597	66059	32577	2.40691e-11	7.81331	2205	829	66059	32577
AIRE	V$AIRE_01.pfm	1.37792e-29	-84.4351	48	3501	4828	93808	5.39421e-18	-57.0515	52	2766	4945	93691	0.00257943	-15.4473	116	2918	4934	93702
Homez_1063.2	Homez_1063.2.pfm	4.01298e-35	-84.8159	57	3492	5735	92901	1.52427e-16	-46.6398	74	2744	5904	92732	0.333072	-4.46028	170	2864	5961	92675
Prrx1_3442.1	Prrx1_3442.1.pfm	1.99387e-23	-84.9339	37	3512	3766	94870	1.19145e-14	-60.1664	37	2781	3717	94919	0.563405	-3.65406	109	2925	3765	94871
Evi1|Evi-1|Evi-1	MA0029.1|V$EVI1_03|V$EVI1_05.pfm	2.76762e-35	-87.0417	54	3495	5601	93035	3.30965e-16	-47.9103	68	2750	5549	93087	0.321607	-4.64844	161	2873	5664	92972
POU3F2|Pou2f2_3748.1|Pou2f3_3986.2	V$POU3F2_02|Pou2f2_3748.1|Pou2f3_3986.2.pfm	6.13358e-85	-87.2163	137	3412	13565	85071	1.28623e-43	-53.2394	158	2660	13585	85051	0.0171205	-6.9762	372	2662	13585	85051
MEF2A|RSRFC4	MA0052.1|V$RSRFC4_01.pfm	1.78186e-49	-87.7503	76	3473	7854	90782	2.46385e-43	-81.0352	61	2757	8251	90385	1.80816e-06	-19.0111	184	2850	8292	90344
Bbx_primary	Bbx_primary.pfm	3.21023e-77	-87.8061	122	3427	12274	86362	2.36169e-35	-48.9408	152	2666	12274	86362	0.485077	1.9109	390	2644	12258	86378
TBP|TATA|TATA|Hoxb13_3479.1|Hoxd10_2368.2|Hoxd13_2356.1	MA0108.2|V$TATA_C|V$TATA_01|Hoxb13_3479.1|Hoxd10_2368.2|Hoxd13_2356.1.pfm	2.05783e-239	-88.0522	437	3112	36884	61752	1.5274e-170	-70.8525	384	2434	36945	61691	3.41178e-10	-11.2404	966	2068	36884	61752
MEF-2|MEF-2	V$MEF2_01|V$HMEF2_Q6.pfm	3.42717e-09	-89.6328	12	3537	1306	97330	0.00361818	-45.9627	11	2807	865	97771	0.0687683	-20.9608	27	3007	1259	97377
Dbx2_3487.1|Hoxa7_3750.1|Hoxb7_3953.1|Lhx9_3492.1|Msx1_3031.2	Dbx2_3487.1|Hoxa7_3750.1|Hoxb7_3953.1|Lhx9_3492.1|Msx1_3031.2.pfm	7.97257e-108	-89.6823	167	3382	16710	81926	1.05833e-59	-57.7795	185	2633	16798	81838	0.477166	1.64353	531	2503	16784	81852
MEF-2|MEF-2	V$MEF2_02|V$MEF2_03.pfm	1.16133e-75	-92.4498	106	3443	11385	87251	4.20867e-40	-56.9802	124	2694	11432	87204	1.02589e-07	-17.8677	260	2774	11435	87201
Foxq1|Foxd3	MA0040.1|MA0041.1.pfm	8.65871e-213	-95.0074	316	3233	30453	68183	5.00453e-91	-50.831	398	2420	30286	68350	0.0125781	-4.78091	872	2162	30453	68183
Cdx-2	V$CDX2_Q5.pfm	9.18362e-162	-98.3804	212	3337	22613	76023	1.37693e-97	-67.3441	225	2593	22753	75883	0.0075375	-5.96037	637	2397	22753	75883
MEF-2	V$MEF2_Q6_01.pfm	2.98818e-229	-99.3176	311	3238	31283	67353	3.6535e-153	-75.054	294	2524	31225	67411	2.90454e-21	-19.2288	723	2311	31313	67323
TBP	V$TBP_01.pfm	0	-100.495	606	2943	51182	47454	4.73027e-186	-58.2868	695	2123	51182	47454	0.00160831	-4.61232	1486	1548	51182	47454
FOXJ2	V$FOXJ2_02.pfm	9.29549e-138	-100.623	168	3381	18930	79706	1.51505e-64	-56.1617	215	2603	18838	79798	0.0677308	-4.44781	542	2492	18930	79706
Arx_1738.2|Hoxa4_3426.1|Isl2_3430.1|Lhx5_2279.1|Lhx6_2272.1|Uncx4.1_2281.2|Vsx1_1728.1	Arx_1738.2|Hoxa4_3426.1|Isl2_3430.1|Lhx5_2279.1|Lhx6_2272.1|Uncx4.1_2281.2|Vsx1_1728.1.pfm	2.1243e-93	-103.008	104	3445	12633	86003	2.76068e-52	-65.4041	121	2697	12633	86003	0.0226297	-6.89776	351	2683	12807	85829
Cdc5	V$CDC5_01.pfm	7.9229e-104	-103.257	116	3433	13995	84641	4.81878e-49	-56.9713	154	2664	14012	84624	0.000858397	-9.64462	367	2667	14012	84624
Arid3a_primary|Alx4_1744.1|Cart1_1275.1|Hoxb4_2627.1|Lmx1a_2238.2|Prop1_3949.1|Shox2_2641.2	Arid3a_primary|Alx4_1744.1|Cart1_1275.1|Hoxb4_2627.1|Lmx1a_2238.2|Prop1_3949.1|Shox2_2641.2.pfm	6.05601e-141	-104.753	157	3392	18627	80009	1.96014e-77	-65.3629	186	2632	18731	79905	0.0224917	-5.63141	526	2508	18731	79905
POU6F1	V$POU6F1_01.pfm	2.69085e-102	-105.819	108	3441	13489	85147	1.09788e-65	-75.7739	111	2707	13460	85176	0.0222652	-6.74287	370	2664	13460	85176
Otp_3496.1	Otp_3496.1.pfm	5.25501e-42	-106.788	41	3508	5478	93158	1.6596e-21	-61.133	54	2764	5472	93164	0.421157	-4.03842	158	2876	5499	93137
MEF-2|aMEF-2	V$MMEF2_Q6|V$AMEF2_Q6.pfm	1.11115e-93	-108.36	93	3456	12098	86538	6.75934e-59	-75.6686	99	2719	12090	86546	5.12046e-07	-16.2867	283	2751	12107	86529
POU1F1	V$POU1F1_Q6.pfm	1.38852e-287	-108.389	333	3216	35650	62986	4.09455e-163	-70.4353	369	2449	35650	62986	1.30232e-05	-7.78479	980	2054	35650	62986
Nkx6-1_2825.1|Nkx6-3_3446.1|Pou4f3_2791.1	Nkx6-1_2825.1|Nkx6-3_3446.1|Pou4f3_2791.1.pfm	2.2466e-205	-109.353	218	3331	25755	72881	1.51295e-128	-76.6409	228	2590	25755	72881	0.000143079	-8.02624	700	2334	25774	72862
Lhx3|En1_3123.2|Nkx6-1_2825.2|Pou1f1_3818.1|Pou3f4_3773.1	V$LHX3_01|En1_3123.2|Nkx6-1_2825.2|Pou1f1_3818.1|Pou3f4_3773.1.pfm	2.13017e-39	-109.865	36	3513	5009	93627	1.37165e-34	-112.554	23	2795	4888	93748	0.0584529	-9.49486	131	2903	5019	93617
Cart-1	V$CART1_01.pfm	1.37556e-96	-110.537	92	3457	12267	86369	2.36346e-65	-82.4758	91	2727	12250	86386	5.23055e-06	-14.4146	298	2736	12349	86287
Pou5f1|Oct-4 (POU5F1)|Oct-4 (POU5F1)	MA0142.1|V$OCT4_02|V$OCT4_01.pfm	2.54387e-48	-111.68	43	3506	6074	92562	6.09822e-22	-55.7069	68	2750	6292	92344	0.386636	3.2479	206	2828	6310	92326
RSRFC4	V$RSRFC4_Q2.pfm	1.96312e-49	-111.755	44	3505	6215	92421	2.90244e-34	-85.7031	42	2776	6155	92481	2.35692e-10	-31.0928	114	2920	6336	92300
Evi-1	V$EVI1_01.pfm	1.87228e-06	-112.348	5	3544	719	97917	9.55931e-05	-84.2424	5	2813	718	97918	0.327336	-15.9356	17	3017	718	97918
Evi-1	V$EVI1_04.pfm	1.3404e-248	-113.728	249	3300	29811	68825	2.44546e-140	-72.5653	287	2531	29783	68853	2.35516e-11	-13.461	748	2286	29797	68839
Pit-1	V$PIT1_Q6.pfm	4.59042e-165	-115.099	151	3398	19982	78654	5.98915e-100	-77.1311	169	2649	20012	78624	2.42837e-11	-16.8086	469	2565	19988	78648
Six6_secondary	Six6_secondary.pfm	6.2113e-203	-116.928	184	3365	24020	74616	1.04687e-110	-71.604	225	2593	23986	74650	2.58021e-41	-34.1222	435	2599	24062	74574
NKX3A	V$NKX3A_01.pfm	6.64508e-233	-121.586	197	3352	26480	72156	6.98745e-113	-67.2889	266	2552	26274	72362	1.67763e-09	-12.8354	668	2366	26480	72156
Pax6_3838.3	Pax6_3838.3.pfm	5.93526e-66	-122.039	49	3500	7728	90908	1.02652e-40	-82.4689	55	2763	7625	91011	0.0467661	-7.80231	209	2825	7766	90870
Lhx1_2240.2	Lhx1_2240.2.pfm	8.15338e-118	-122.071	91	3458	13712	84924	6.3755e-73	-81.6512	105	2713	13824	84812	0.000239092	-10.8123	355	2679	13824	84812
Tbp_primary	Tbp_primary.pfm	0	-122.85	592	2957	57413	41223	8.50161e-305	-78.3719	653	2165	57413	41223	2.04658e-07	-7.27443	1622	1412	57413	41223
Hoxd8_2644.1	Hoxd8_2644.1.pfm	1.92412e-80	-123.337	59	3490	9332	89304	1.37008e-58	-95.61	58	2760	9549	89087	0.0001202	-13.9017	232	2802	9563	89073
MEF-2	V$MEF2_04.pfm	0.000664545	-132.157	2	3547	351	98285	0.070025	-111.322	1	2817	187	98449	0.280699	-28.6652	7	3027	360	98276
Sox14_primary|Sox21_primary|Sry_primary|Sox30_secondary	Sox14_primary|Sox21_primary|Sry_primary|Sox30_secondary.pfm	7.36823e-195	-133.676	129	3420	20778	77858	8.66357e-136	-101.036	128	2690	20778	77858	2.06251e-22	-25.1192	431	2603	20927	77709
Irx6_2623.2	Irx6_2623.2.pfm	2.83942e-86	-137.206	50	3499	9228	89408	2.08575e-51	-87.2456	62	2756	9117	89519	3.45954e-06	-17.3978	211	2823	9237	89399
Hlx1_2350.1	Hlx1_2350.1.pfm	2.55085e-174	-139.13	104	3445	18160	80476	1.00763e-96	-83.182	137	2681	17917	80719	4.74372e-06	-11.7239	462	2572	18180	80456
Lhx3|Alx3_3418.2	MA0135.1|Alx3_3418.2.pfm	5.81894e-73	-143.27	38	3511	7580	91056	5.10117e-57	-118.191	35	2783	7820	90816	8.66611e-08	-22.5752	161	2873	7719	90917
Pou3f3_3235.2	Pou3f3_3235.2.pfm	2.98186e-49	-146.342	24	3525	5041	93595	1.24184e-26	-79.5295	38	2780	5119	93517	0.00128115	-16.3692	118	2916	5100	93536
Lmx1b_3433.2|Phox2b_3948.1|Pou3f1_3819.1|Pou3f2_2824.1	Lmx1b_3433.2|Phox2b_3948.1|Pou3f1_3819.1|Pou3f2_2824.1.pfm	6.52499e-84	-153.092	38	3511	8339	90297	8.08601e-54	-103.905	44	2774	8173	90463	2.7112e-07	-20.579	182	2852	8423	90213
Lhx3_3431.1	Lhx3_3431.1.pfm	4.04481e-100	-155.915	44	3505	9812	88824	1.03314e-67	-109.383	50	2768	9849	88787	4.01445e-07	-18.4997	221	2813	9849	88787
Tlx2_3498.2	Tlx2_3498.2.pfm	4.62627e-142	-164.333	57	3492	13376	85260	6.91067e-97	-115.521	65	2753	13442	85194	5.72935e-13	-23.0116	280	2754	13372	85264
PLZF	V$PLZF_02.pfm	0.00139935	-178.89	1	3548	277	98359	0.136541	-97.9614	1	2817	152	98484	0.24977	-61.5185	2	3032	164	98472
POU3F2	V$POU3F2_01.pfm	5.54732e-66	-202.097	16	3533	5653	92983	5.32886e-37	-101.732	31	2787	5690	92946	8.62253e-11	-34.4179	96	2938	5653	92983
FOXP1	V$FOXP1_01.pfm	6.9401e-40	-301.918	4	3545	2961	95675	4.09998e-32	-158.502	10	2808	3640	94996	4.14168e-21	-84.6699	28	3006	3640	94996
