# Supplementary material for: Temporal mapping of CEBPA and CEBPB binding during liver regeneration reveals dynamic occupancy and specific regulatory codes for homeostatic and cell cycle gene batteries
Source: HighWire-hosted journal article supplement (doi:10.1101/gr.146399.112), 2013-02-12
Supplement: Supp_Table_S8.xlsx [file Supp_Table_S8.xlsx]

## Sheet: Sheet1
Jakobsen_Table S8
				GO-terms
Symbol	A	B	C	biological_process	cellular_component	molecular_function	Total Body counts	Total RPK
Junb	true	false	false	vasculogenesis;osteoblast differentiation;in utero embryonic development;trophectodermal cell differentiation;transcription, DNA-dependent;regulation of transcription, DNA-dependent;transcription from RNA polymerase II promoter;cellular process;osteoclast differentiation;osteoblast proliferation;positive regulation of cell differentiation;decidualization;regulation of cell cycle;embryonic process…	nucleus	DNA binding;double-stranded DNA binding;sequence-specific DNA binding transcription factor activity;protein binding;sequence-specific DNA binding;protein dimerization activity	1.71458e+06	948855
Junb	true	false	false	vasculogenesis;osteoblast differentiation;in utero embryonic development;trophectodermal cell differentiation;transcription, DNA-dependent;regulation of transcription, DNA-dependent;transcription from RNA polymerase II promoter;cellular process;osteoclast differentiation;osteoblast proliferation;positive regulation of cell differentiation;decidualization;regulation of cell cycle;embryonic process…	nucleus	DNA binding;double-stranded DNA binding;sequence-specific DNA binding transcription factor activity;protein binding;sequence-specific DNA binding;protein dimerization activity	1.71458e+06	948855
Cebpb	true	false	false	embryonic placenta development;transcription, DNA-dependent;regulation of transcription, DNA-dependent;anti-apoptosis;induction of apoptosis;cell differentiation;neuron differentiation;response to lipopolysaccharide;mammary gland epithelial cell proliferation;regulation of interleukin-6 biosynthetic process;fat cell differentiation;positive regulation of osteoblast differentiation;negative regula…	nuclear chromatin;nucleus;cytoplasm;nuclear matrix	RNA polymerase II core promoter proximal region sequence-specific DNA binding transcription factor activity involved in positive regulation of transcription;DNA binding;sequence-specific DNA binding transcription factor activity;sequence-specific distal enhancer binding RNA polymerase II transcription factor activity;protein binding;transcription factor binding;glucocorticoid receptor binding;pro…	859052	571178
Cebpb	false	true	false	embryonic placenta development;transcription, DNA-dependent;regulation of transcription, DNA-dependent;anti-apoptosis;induction of apoptosis;cell differentiation;neuron differentiation;response to lipopolysaccharide;mammary gland epithelial cell proliferation;regulation of interleukin-6 biosynthetic process;fat cell differentiation;positive regulation of osteoblast differentiation;negative regula…	nuclear chromatin;nucleus;cytoplasm;nuclear matrix	RNA polymerase II core promoter proximal region sequence-specific DNA binding transcription factor activity involved in positive regulation of transcription;DNA binding;sequence-specific DNA binding transcription factor activity;sequence-specific distal enhancer binding RNA polymerase II transcription factor activity;protein binding;transcription factor binding;glucocorticoid receptor binding;pro…	859052	571178
Jund	true	false	false	osteoblast development;transcription, DNA-dependent;regulation of transcription, DNA-dependent;transcription from RNA polymerase II promoter;positive regulation of osteoblast differentiation;positive regulation of transcription from RNA polymerase II promoter;cellular response to calcium ion	nucleus;protein complex	DNA binding;double-stranded DNA binding;sequence-specific DNA binding transcription factor activity;ligand-dependent nuclear receptor binding;sequence-specific DNA binding;transcription regulatory region DNA binding;protein dimerization activity	1.48054e+06	514435
Jund	true	false	false	osteoblast development;transcription, DNA-dependent;regulation of transcription, DNA-dependent;transcription from RNA polymerase II promoter;positive regulation of osteoblast differentiation;positive regulation of transcription from RNA polymerase II promoter;cellular response to calcium ion	nucleus;protein complex	DNA binding;double-stranded DNA binding;sequence-specific DNA binding transcription factor activity;ligand-dependent nuclear receptor binding;sequence-specific DNA binding;transcription regulatory region DNA binding;protein dimerization activity	1.48054e+06	514435
Id2	false	true	false	negative regulation of transcription from RNA polymerase II promoter;metanephros development;natural killer cell differentiation;leukocyte differentiation;bundle of His development;multicellular organismal development;heart development;positive regulation of cell proliferation;entrainment of circadian clock;positive regulation of gene expression;negative regulation of gene expression;oligodendroc…	chromatin;nucleus;cytoplasm;cytosol;protein complex	protein binding	930310	405541
Id2	false	true	false	negative regulation of transcription from RNA polymerase II promoter;metanephros development;natural killer cell differentiation;leukocyte differentiation;bundle of His development;multicellular organismal development;heart development;positive regulation of cell proliferation;entrainment of circadian clock;positive regulation of gene expression;negative regulation of gene expression;oligodendroc…	chromatin;nucleus;cytoplasm;cytosol;protein complex	protein binding	930310	405541
Id2	false	true	false	negative regulation of transcription from RNA polymerase II promoter;metanephros development;natural killer cell differentiation;leukocyte differentiation;bundle of His development;multicellular organismal development;heart development;positive regulation of cell proliferation;entrainment of circadian clock;positive regulation of gene expression;negative regulation of gene expression;oligodendroc…	chromatin;nucleus;cytoplasm;cytosol;protein complex	protein binding	930310	405541
Id2	false	false	true	negative regulation of transcription from RNA polymerase II promoter;metanephros development;natural killer cell differentiation;leukocyte differentiation;bundle of His development;multicellular organismal development;heart development;positive regulation of cell proliferation;entrainment of circadian clock;positive regulation of gene expression;negative regulation of gene expression;oligodendroc…	chromatin;nucleus;cytoplasm;cytosol;protein complex	protein binding	930310	405541
Id2	true	false	false	negative regulation of transcription from RNA polymerase II promoter;metanephros development;natural killer cell differentiation;leukocyte differentiation;bundle of His development;multicellular organismal development;heart development;positive regulation of cell proliferation;entrainment of circadian clock;positive regulation of gene expression;negative regulation of gene expression;oligodendroc…	chromatin;nucleus;cytoplasm;cytosol;protein complex	protein binding	930310	405541
Id2	false	true	false	negative regulation of transcription from RNA polymerase II promoter;metanephros development;natural killer cell differentiation;leukocyte differentiation;bundle of His development;multicellular organismal development;heart development;positive regulation of cell proliferation;entrainment of circadian clock;positive regulation of gene expression;negative regulation of gene expression;oligodendroc…	chromatin;nucleus;cytoplasm;cytosol;protein complex	protein binding	930310	405541
Id2	false	true	false	negative regulation of transcription from RNA polymerase II promoter;metanephros development;natural killer cell differentiation;leukocyte differentiation;bundle of His development;multicellular organismal development;heart development;positive regulation of cell proliferation;entrainment of circadian clock;positive regulation of gene expression;negative regulation of gene expression;oligodendroc…	chromatin;nucleus;cytoplasm;cytosol;protein complex	protein binding	930310	405541
Id2	false	false	true	negative regulation of transcription from RNA polymerase II promoter;metanephros development;natural killer cell differentiation;leukocyte differentiation;bundle of His development;multicellular organismal development;heart development;positive regulation of cell proliferation;entrainment of circadian clock;positive regulation of gene expression;negative regulation of gene expression;oligodendroc…	chromatin;nucleus;cytoplasm;cytosol;protein complex	protein binding	930310	405541
Id2	true	false	false	negative regulation of transcription from RNA polymerase II promoter;metanephros development;natural killer cell differentiation;leukocyte differentiation;bundle of His development;multicellular organismal development;heart development;positive regulation of cell proliferation;entrainment of circadian clock;positive regulation of gene expression;negative regulation of gene expression;oligodendroc…	chromatin;nucleus;cytoplasm;cytosol;protein complex	protein binding	930310	405541
Id2	false	false	false	negative regulation of transcription from RNA polymerase II promoter;metanephros development;natural killer cell differentiation;leukocyte differentiation;bundle of His development;multicellular organismal development;heart development;positive regulation of cell proliferation;entrainment of circadian clock;positive regulation of gene expression;negative regulation of gene expression;oligodendroc…	chromatin;nucleus;cytoplasm;cytosol;protein complex	protein binding	930310	405541
Id2	true	false	false	negative regulation of transcription from RNA polymerase II promoter;metanephros development;natural killer cell differentiation;leukocyte differentiation;bundle of His development;multicellular organismal development;heart development;positive regulation of cell proliferation;entrainment of circadian clock;positive regulation of gene expression;negative regulation of gene expression;oligodendroc…	chromatin;nucleus;cytoplasm;cytosol;protein complex	protein binding	930310	405541
Id3	true	false	false	negative regulation of transcription from RNA polymerase II promoter;regulation of DNA replication;transcription, DNA-dependent;multicellular organismal development;heart development;epithelial cell differentiation;positive regulation of apoptotic process;negative regulation of sequence-specific DNA binding transcription factor activity;negative regulation of osteoblast differentiation;negative r…	nucleus;cytoplasm	sequence-specific DNA binding transcription factor activity;protein binding;transcription factor binding;protein domain specific binding	636960	405449
Jun	true	false	false	angiogenesis;microglial cell activation;release of cytochrome c from mitochondria;liver development;positive regulation of endothelial cell proliferation;outflow tract morphogenesis;transcription, DNA-dependent;regulation of transcription, DNA-dependent;transcription from RNA polymerase II promoter;transforming growth factor beta receptor signaling pathway;SMAD protein import into nucleus;learnin…	nuclear chromatin;nucleus;transcription factor complex;cytosol;transcriptional repressor complex	RNA polymerase II core promoter proximal region sequence-specific DNA binding transcription factor activity involved in positive regulation of transcription;DNA binding;double-stranded DNA binding;sequence-specific DNA binding transcription factor activity;sequence-specific distal enhancer binding RNA polymerase II transcription factor activity;transcription coactivator activity;Rho GTPase activa…	1.14674e+06	359818
Jun	false	true	false	angiogenesis;microglial cell activation;release of cytochrome c from mitochondria;liver development;positive regulation of endothelial cell proliferation;outflow tract morphogenesis;transcription, DNA-dependent;regulation of transcription, DNA-dependent;transcription from RNA polymerase II promoter;transforming growth factor beta receptor signaling pathway;SMAD protein import into nucleus;learnin…	nuclear chromatin;nucleus;transcription factor complex;cytosol;transcriptional repressor complex	RNA polymerase II core promoter proximal region sequence-specific DNA binding transcription factor activity involved in positive regulation of transcription;DNA binding;double-stranded DNA binding;sequence-specific DNA binding transcription factor activity;sequence-specific distal enhancer binding RNA polymerase II transcription factor activity;transcription coactivator activity;Rho GTPase activa…	1.14674e+06	359818
Jun	true	false	false	angiogenesis;microglial cell activation;release of cytochrome c from mitochondria;liver development;positive regulation of endothelial cell proliferation;outflow tract morphogenesis;transcription, DNA-dependent;regulation of transcription, DNA-dependent;transcription from RNA polymerase II promoter;transforming growth factor beta receptor signaling pathway;SMAD protein import into nucleus;learnin…	nuclear chromatin;nucleus;transcription factor complex;cytosol;transcriptional repressor complex	RNA polymerase II core promoter proximal region sequence-specific DNA binding transcription factor activity involved in positive regulation of transcription;DNA binding;double-stranded DNA binding;sequence-specific DNA binding transcription factor activity;sequence-specific distal enhancer binding RNA polymerase II transcription factor activity;transcription coactivator activity;Rho GTPase activa…	1.14674e+06	359818
Jun	false	false	true	angiogenesis;microglial cell activation;release of cytochrome c from mitochondria;liver development;positive regulation of endothelial cell proliferation;outflow tract morphogenesis;transcription, DNA-dependent;regulation of transcription, DNA-dependent;transcription from RNA polymerase II promoter;transforming growth factor beta receptor signaling pathway;SMAD protein import into nucleus;learnin…	nuclear chromatin;nucleus;transcription factor complex;cytosol;transcriptional repressor complex	RNA polymerase II core promoter proximal region sequence-specific DNA binding transcription factor activity involved in positive regulation of transcription;DNA binding;double-stranded DNA binding;sequence-specific DNA binding transcription factor activity;sequence-specific distal enhancer binding RNA polymerase II transcription factor activity;transcription coactivator activity;Rho GTPase activa…	1.14674e+06	359818
Mafb	false	true	false	transcription, DNA-dependent;regulation of transcription, DNA-dependent;regulation of transcription from RNA polymerase II promoter;segment specification;respiratory gaseous exchange;rhombomere 5 development;rhombomere 6 development;brain segmentation;inner ear morphogenesis;negative regulation of erythrocyte differentiation;positive regulation of transcription from RNA polymerase II promoter	nucleus;transcription factor complex	DNA binding;sequence-specific DNA binding transcription factor activity;protein binding;transcription factor binding;sequence-specific DNA binding	1.00329e+06	296043
Mafb	true	false	false	transcription, DNA-dependent;regulation of transcription, DNA-dependent;regulation of transcription from RNA polymerase II promoter;segment specification;respiratory gaseous exchange;rhombomere 5 development;rhombomere 6 development;brain segmentation;inner ear morphogenesis;negative regulation of erythrocyte differentiation;positive regulation of transcription from RNA polymerase II promoter	nucleus;transcription factor complex	DNA binding;sequence-specific DNA binding transcription factor activity;protein binding;transcription factor binding;sequence-specific DNA binding	1.00329e+06	296043
Nfkbia	true	false	false	protein import into nucleus, translocation;cytoplasmic sequestering of NF-kappaB;negative regulation of macrophage derived foam cell differentiation;positive regulation of cholesterol efflux;negative regulation of lipid storage;lipopolysaccharide-mediated signaling pathway;negative regulation of NF-kappaB transcription factor activity;positive regulation of cellular protein metabolic process;resp…	nucleus;cytoplasm;cytosol;plasma membrane;protein complex	protein binding;nuclear localization sequence binding;enzyme binding;heat shock protein binding;ubiquitin protein ligase binding;protein complex binding;identical protein binding;NF-kappaB binding	781548	241293
Nfkbia	true	false	false	protein import into nucleus, translocation;cytoplasmic sequestering of NF-kappaB;negative regulation of macrophage derived foam cell differentiation;positive regulation of cholesterol efflux;negative regulation of lipid storage;lipopolysaccharide-mediated signaling pathway;negative regulation of NF-kappaB transcription factor activity;positive regulation of cellular protein metabolic process;resp…	nucleus;cytoplasm;cytosol;plasma membrane;protein complex	protein binding;nuclear localization sequence binding;enzyme binding;heat shock protein binding;ubiquitin protein ligase binding;protein complex binding;identical protein binding;NF-kappaB binding	781548	241293
Nfkbia	true	false	false	protein import into nucleus, translocation;cytoplasmic sequestering of NF-kappaB;negative regulation of macrophage derived foam cell differentiation;positive regulation of cholesterol efflux;negative regulation of lipid storage;lipopolysaccharide-mediated signaling pathway;negative regulation of NF-kappaB transcription factor activity;positive regulation of cellular protein metabolic process;resp…	nucleus;cytoplasm;cytosol;plasma membrane;protein complex	protein binding;nuclear localization sequence binding;enzyme binding;heat shock protein binding;ubiquitin protein ligase binding;protein complex binding;identical protein binding;NF-kappaB binding	781548	241293
Klf15	false	true	false	transcription, DNA-dependent;regulation of transcription, DNA-dependent;glial cell differentiation;glucose transport;positive regulation of transcription, DNA-dependent;positive regulation of transcription from RNA polymerase II promoter	intracellular;nucleus;nucleolus	nucleic acid binding;DNA binding;sequence-specific DNA binding transcription factor activity;protein binding;zinc ion binding;metal ion binding	3.02352e+06	240267
Klf15	true	false	false	transcription, DNA-dependent;regulation of transcription, DNA-dependent;glial cell differentiation;glucose transport;positive regulation of transcription, DNA-dependent;positive regulation of transcription from RNA polymerase II promoter	intracellular;nucleus;nucleolus	nucleic acid binding;DNA binding;sequence-specific DNA binding transcription factor activity;protein binding;zinc ion binding;metal ion binding	3.02352e+06	240267
Klf15	true	false	false	transcription, DNA-dependent;regulation of transcription, DNA-dependent;glial cell differentiation;glucose transport;positive regulation of transcription, DNA-dependent;positive regulation of transcription from RNA polymerase II promoter	intracellular;nucleus;nucleolus	nucleic acid binding;DNA binding;sequence-specific DNA binding transcription factor activity;protein binding;zinc ion binding;metal ion binding	3.02352e+06	240267
Klf15	false	false	true	transcription, DNA-dependent;regulation of transcription, DNA-dependent;glial cell differentiation;glucose transport;positive regulation of transcription, DNA-dependent;positive regulation of transcription from RNA polymerase II promoter	intracellular;nucleus;nucleolus	nucleic acid binding;DNA binding;sequence-specific DNA binding transcription factor activity;protein binding;zinc ion binding;metal ion binding	3.02352e+06	240267
Klf15	true	false	false	transcription, DNA-dependent;regulation of transcription, DNA-dependent;glial cell differentiation;glucose transport;positive regulation of transcription, DNA-dependent;positive regulation of transcription from RNA polymerase II promoter	intracellular;nucleus;nucleolus	nucleic acid binding;DNA binding;sequence-specific DNA binding transcription factor activity;protein binding;zinc ion binding;metal ion binding	3.02352e+06	240267
Cebpa	true	false	false	urea cycle;negative regulation of transcription from RNA polymerase II promoter;liver development;embryonic placenta development;transcription, DNA-dependent;regulation of transcription, DNA-dependent;regulation of transcription from RNA polymerase II promoter;mitochondrion organization;cholesterol metabolic process;negative regulation of cell proliferation;cytokine-mediated signaling pathway;mye…	nucleus;transcription factor complex;nuclear matrix;Rb-E2F complex;protein complex	DNA binding;sequence-specific DNA binding transcription factor activity;sequence-specific distal enhancer binding RNA polymerase II transcription factor activity;protein binding;transcription factor binding;protein domain specific binding;protein complex binding;protein homodimerization activity;sequence-specific DNA binding;transcription regulatory region DNA binding;protein heterodimerization a…	554289	209958
Cebpa	true	false	false	urea cycle;negative regulation of transcription from RNA polymerase II promoter;liver development;embryonic placenta development;transcription, DNA-dependent;regulation of transcription, DNA-dependent;regulation of transcription from RNA polymerase II promoter;mitochondrion organization;cholesterol metabolic process;negative regulation of cell proliferation;cytokine-mediated signaling pathway;mye…	nucleus;transcription factor complex;nuclear matrix;Rb-E2F complex;protein complex	DNA binding;sequence-specific DNA binding transcription factor activity;sequence-specific distal enhancer binding RNA polymerase II transcription factor activity;protein binding;transcription factor binding;protein domain specific binding;protein complex binding;protein homodimerization activity;sequence-specific DNA binding;transcription regulatory region DNA binding;protein heterodimerization a…	554289	209958
Cebpa	false	false	false	urea cycle;negative regulation of transcription from RNA polymerase II promoter;liver development;embryonic placenta development;transcription, DNA-dependent;regulation of transcription, DNA-dependent;regulation of transcription from RNA polymerase II promoter;mitochondrion organization;cholesterol metabolic process;negative regulation of cell proliferation;cytokine-mediated signaling pathway;mye…	nucleus;transcription factor complex;nuclear matrix;Rb-E2F complex;protein complex	DNA binding;sequence-specific DNA binding transcription factor activity;sequence-specific distal enhancer binding RNA polymerase II transcription factor activity;protein binding;transcription factor binding;protein domain specific binding;protein complex binding;protein homodimerization activity;sequence-specific DNA binding;transcription regulatory region DNA binding;protein heterodimerization a…	554289	209958
Cebpa	true	false	false	urea cycle;negative regulation of transcription from RNA polymerase II promoter;liver development;embryonic placenta development;transcription, DNA-dependent;regulation of transcription, DNA-dependent;regulation of transcription from RNA polymerase II promoter;mitochondrion organization;cholesterol metabolic process;negative regulation of cell proliferation;cytokine-mediated signaling pathway;mye…	nucleus;transcription factor complex;nuclear matrix;Rb-E2F complex;protein complex	DNA binding;sequence-specific DNA binding transcription factor activity;sequence-specific distal enhancer binding RNA polymerase II transcription factor activity;protein binding;transcription factor binding;protein domain specific binding;protein complex binding;protein homodimerization activity;sequence-specific DNA binding;transcription regulatory region DNA binding;protein heterodimerization a…	554289	209958
Cebpa	false	true	false	urea cycle;negative regulation of transcription from RNA polymerase II promoter;liver development;embryonic placenta development;transcription, DNA-dependent;regulation of transcription, DNA-dependent;regulation of transcription from RNA polymerase II promoter;mitochondrion organization;cholesterol metabolic process;negative regulation of cell proliferation;cytokine-mediated signaling pathway;mye…	nucleus;transcription factor complex;nuclear matrix;Rb-E2F complex;protein complex	DNA binding;sequence-specific DNA binding transcription factor activity;sequence-specific distal enhancer binding RNA polymerase II transcription factor activity;protein binding;transcription factor binding;protein domain specific binding;protein complex binding;protein homodimerization activity;sequence-specific DNA binding;transcription regulatory region DNA binding;protein heterodimerization a…	554289	209958
Thrsp	true	false	false	transcription, DNA-dependent;regulation of transcription, DNA-dependent;lipid biosynthetic process;regulation of triglyceride biosynthetic process;regulation of lipid biosynthetic process	nucleus;cytoplasm;cytosol	protein binding;protein homodimerization activity	921347	202316
Thrsp	false	true	false	transcription, DNA-dependent;regulation of transcription, DNA-dependent;lipid biosynthetic process;regulation of triglyceride biosynthetic process;regulation of lipid biosynthetic process	nucleus;cytoplasm;cytosol	protein binding;protein homodimerization activity	921347	202316
Thrsp	true	false	false	transcription, DNA-dependent;regulation of transcription, DNA-dependent;lipid biosynthetic process;regulation of triglyceride biosynthetic process;regulation of lipid biosynthetic process	nucleus;cytoplasm;cytosol	protein binding;protein homodimerization activity	921347	202316
Dbp	true	false	false	transcription, DNA-dependent;regulation of transcription, DNA-dependent;circadian rhythm;positive regulation of transcription from RNA polymerase II promoter;rhythmic process	nucleus	RNA polymerase II core promoter proximal region sequence-specific DNA binding transcription factor activity involved in positive regulation of transcription;DNA binding;sequence-specific DNA binding transcription factor activity;sequence-specific DNA binding;protein dimerization activity	942913	190219
Ing1	false	true	false	protein import into nucleus;cell cycle;regulation of cell death;positive regulation of transcription, DNA-dependent	nucleus	zinc ion binding;methylated histone residue binding;metal ion binding	1.35778e+06	188974
Atf4	true	false	false	gluconeogenesis;transcription, DNA-dependent;regulation of transcription, DNA-dependent;regulation of transcription from RNA polymerase II promoter;gamma-aminobutyric acid signaling pathway;response to endoplasmic reticulum stress;negative regulation of potassium ion transport;positive regulation of transcription, DNA-dependent;positive regulation of transcription from RNA polymerase II promoter	nucleus;transcription factor complex;cytoplasm;cytoskeleton;plasma membrane;membrane;dendrite membrane	DNA binding;sequence-specific DNA binding transcription factor activity;protein binding;protein C-terminus binding;sequence-specific DNA binding;protein dimerization activity	440999	187022
Xbp1	false	true	false	epithelial cell maturation;transcription, DNA-dependent;regulation of transcription, DNA-dependent;transcription from RNA polymerase II promoter;endoplasmic reticulum unfolded protein response;exocrine pancreas development;response to drug;response to electrical stimulus;serotonin secretion, neurotransmission;epithelial cell maturation involved in salivary gland development	nucleus	DNA binding;sequence-specific DNA binding transcription factor activity;sequence-specific DNA binding;protein dimerization activity	830338	169249
Xbp1	true	false	false	epithelial cell maturation;transcription, DNA-dependent;regulation of transcription, DNA-dependent;transcription from RNA polymerase II promoter;endoplasmic reticulum unfolded protein response;exocrine pancreas development;response to drug;response to electrical stimulus;serotonin secretion, neurotransmission;epithelial cell maturation involved in salivary gland development	nucleus	DNA binding;sequence-specific DNA binding transcription factor activity;sequence-specific DNA binding;protein dimerization activity	830338	169249
Xbp1	false	false	false	epithelial cell maturation;transcription, DNA-dependent;regulation of transcription, DNA-dependent;transcription from RNA polymerase II promoter;endoplasmic reticulum unfolded protein response;exocrine pancreas development;response to drug;response to electrical stimulus;serotonin secretion, neurotransmission;epithelial cell maturation involved in salivary gland development	nucleus	DNA binding;sequence-specific DNA binding transcription factor activity;sequence-specific DNA binding;protein dimerization activity	830338	169249
Xbp1	false	true	false	epithelial cell maturation;transcription, DNA-dependent;regulation of transcription, DNA-dependent;transcription from RNA polymerase II promoter;endoplasmic reticulum unfolded protein response;exocrine pancreas development;response to drug;response to electrical stimulus;serotonin secretion, neurotransmission;epithelial cell maturation involved in salivary gland development	nucleus	DNA binding;sequence-specific DNA binding transcription factor activity;sequence-specific DNA binding;protein dimerization activity	830338	169249
Xbp1	false	true	false	epithelial cell maturation;transcription, DNA-dependent;regulation of transcription, DNA-dependent;transcription from RNA polymerase II promoter;endoplasmic reticulum unfolded protein response;exocrine pancreas development;response to drug;response to electrical stimulus;serotonin secretion, neurotransmission;epithelial cell maturation involved in salivary gland development	nucleus	DNA binding;sequence-specific DNA binding transcription factor activity;sequence-specific DNA binding;protein dimerization activity	830338	169249
Xbp1	true	false	false	epithelial cell maturation;transcription, DNA-dependent;regulation of transcription, DNA-dependent;transcription from RNA polymerase II promoter;endoplasmic reticulum unfolded protein response;exocrine pancreas development;response to drug;response to electrical stimulus;serotonin secretion, neurotransmission;epithelial cell maturation involved in salivary gland development	nucleus	DNA binding;sequence-specific DNA binding transcription factor activity;sequence-specific DNA binding;protein dimerization activity	830338	169249
Btg2	true	false	false	transcription, DNA-dependent;regulation of transcription, DNA-dependent;protein methylation;response to DNA damage stimulus;associative learning;anterior/posterior pattern specification;dentate gyrus development;central nervous system neuron development;neuron differentiation;neuron projection development;negative regulation of apoptotic process;positive regulation of anti-apoptosis;positive regu…		RNA polymerase II core promoter proximal region sequence-specific DNA binding transcription factor activity involved in positive regulation of transcription;protein binding	718706	167492
Btg2	false	false	true	transcription, DNA-dependent;regulation of transcription, DNA-dependent;protein methylation;response to DNA damage stimulus;associative learning;anterior/posterior pattern specification;dentate gyrus development;central nervous system neuron development;neuron differentiation;neuron projection development;negative regulation of apoptotic process;positive regulation of anti-apoptosis;positive regu…		RNA polymerase II core promoter proximal region sequence-specific DNA binding transcription factor activity involved in positive regulation of transcription;protein binding	718706	167492
Klf10	true	false	false	transcription, DNA-dependent;regulation of transcription, DNA-dependent;induction of apoptosis;bone mineralization;somatic stem cell maintenance;regulation of cell proliferation;positive regulation of osteoclast differentiation	intracellular;nucleus	nucleic acid binding;DNA binding;zinc ion binding;metal ion binding	960633	152603
Klf10	true	false	false	transcription, DNA-dependent;regulation of transcription, DNA-dependent;induction of apoptosis;bone mineralization;somatic stem cell maintenance;regulation of cell proliferation;positive regulation of osteoclast differentiation	intracellular;nucleus	nucleic acid binding;DNA binding;zinc ion binding;metal ion binding	960633	152603
Klf10	false	true	false	transcription, DNA-dependent;regulation of transcription, DNA-dependent;induction of apoptosis;bone mineralization;somatic stem cell maintenance;regulation of cell proliferation;positive regulation of osteoclast differentiation	intracellular;nucleus	nucleic acid binding;DNA binding;zinc ion binding;metal ion binding	960633	152603
Klf10	true	false	false	transcription, DNA-dependent;regulation of transcription, DNA-dependent;induction of apoptosis;bone mineralization;somatic stem cell maintenance;regulation of cell proliferation;positive regulation of osteoclast differentiation	intracellular;nucleus	nucleic acid binding;DNA binding;zinc ion binding;metal ion binding	960633	152603
Nr1d1	false	true	false	negative regulation of transcription from RNA polymerase II promoter;transcription, DNA-dependent;regulation of transcription, DNA-dependent;circadian rhythm;negative regulation of receptor biosynthetic process;negative regulation of toll-like receptor 4 signaling pathway;steroid hormone mediated signaling pathway;cellular response to lipopolysaccharide	nuclear chromatin;nucleus	DNA binding;sequence-specific DNA binding transcription factor activity;steroid hormone receptor activity;receptor activity;zinc ion binding;sequence-specific DNA binding;transcription regulatory region DNA binding;metal ion binding	1.03179e+06	141186
Mafg	true	false	false	in utero embryonic development;transcription, DNA-dependent;regulation of transcription, DNA-dependent;adult behavior;regulation of cellular pH;regulation of cell proliferation;regulation of epidermal cell differentiation	nucleus	DNA binding;sequence-specific DNA binding transcription factor activity;sequence-specific DNA binding	675055	129943
Foxa2	false	false	false	negative regulation of transcription from RNA polymerase II promoter;positive regulation of transcription from RNA polymerase II promoter by glucose;negative regulation of transcription from RNA polymerase II promoter by glucose;in utero embryonic development;ectoderm formation;cell fate specification;transcription, DNA-dependent;regulation of transcription, DNA-dependent;regulation of transcript…	nucleus;transcription factor complex;cytoplasm;cell part	RNA polymerase II core promoter proximal region sequence-specific DNA binding;RNA polymerase II core promoter proximal region sequence-specific DNA binding transcription factor activity involved in positive regulation of transcription;DNA binding;double-stranded DNA binding;sequence-specific DNA binding transcription factor activity;sequence-specific distal enhancer binding RNA polymerase II tran…	521065	127338
Foxa2	false	false	true	negative regulation of transcription from RNA polymerase II promoter;positive regulation of transcription from RNA polymerase II promoter by glucose;negative regulation of transcription from RNA polymerase II promoter by glucose;in utero embryonic development;ectoderm formation;cell fate specification;transcription, DNA-dependent;regulation of transcription, DNA-dependent;regulation of transcript…	nucleus;transcription factor complex;cytoplasm;cell part	RNA polymerase II core promoter proximal region sequence-specific DNA binding;RNA polymerase II core promoter proximal region sequence-specific DNA binding transcription factor activity involved in positive regulation of transcription;DNA binding;double-stranded DNA binding;sequence-specific DNA binding transcription factor activity;sequence-specific distal enhancer binding RNA polymerase II tran…	521065	127338
Rxra	false	false	true	negative regulation of transcription from RNA polymerase II promoter;heart morphogenesis;transcription, DNA-dependent;regulation of transcription, DNA-dependent;regulation of transcription from RNA polymerase II promoter;heart development;negative regulation of cell proliferation;negative regulation of gene expression;virus-host interaction;response to retinoic acid;peroxisome proliferator activa…	nuclear chromatin;nucleus;axon	DNA binding;double-stranded DNA binding;sequence-specific DNA binding transcription factor activity;steroid hormone receptor activity;receptor activity;ligand-activated sequence-specific DNA binding RNA polymerase II transcription factor activity;9-cis retinoic acid receptor activity;steroid binding;protein binding;transcription factor binding;zinc ion binding;enzyme binding;vitamin D receptor bi…	1.05934e+07	123009
Rxra	true	false	false	negative regulation of transcription from RNA polymerase II promoter;heart morphogenesis;transcription, DNA-dependent;regulation of transcription, DNA-dependent;regulation of transcription from RNA polymerase II promoter;heart development;negative regulation of cell proliferation;negative regulation of gene expression;virus-host interaction;response to retinoic acid;peroxisome proliferator activa…	nuclear chromatin;nucleus;axon	DNA binding;double-stranded DNA binding;sequence-specific DNA binding transcription factor activity;steroid hormone receptor activity;receptor activity;ligand-activated sequence-specific DNA binding RNA polymerase II transcription factor activity;9-cis retinoic acid receptor activity;steroid binding;protein binding;transcription factor binding;zinc ion binding;enzyme binding;vitamin D receptor bi…	1.05934e+07	123009
Rxra	true	false	false	negative regulation of transcription from RNA polymerase II promoter;heart morphogenesis;transcription, DNA-dependent;regulation of transcription, DNA-dependent;regulation of transcription from RNA polymerase II promoter;heart development;negative regulation of cell proliferation;negative regulation of gene expression;virus-host interaction;response to retinoic acid;peroxisome proliferator activa…	nuclear chromatin;nucleus;axon	DNA binding;double-stranded DNA binding;sequence-specific DNA binding transcription factor activity;steroid hormone receptor activity;receptor activity;ligand-activated sequence-specific DNA binding RNA polymerase II transcription factor activity;9-cis retinoic acid receptor activity;steroid binding;protein binding;transcription factor binding;zinc ion binding;enzyme binding;vitamin D receptor bi…	1.05934e+07	123009
Rxra	true	false	false	negative regulation of transcription from RNA polymerase II promoter;heart morphogenesis;transcription, DNA-dependent;regulation of transcription, DNA-dependent;regulation of transcription from RNA polymerase II promoter;heart development;negative regulation of cell proliferation;negative regulation of gene expression;virus-host interaction;response to retinoic acid;peroxisome proliferator activa…	nuclear chromatin;nucleus;axon	DNA binding;double-stranded DNA binding;sequence-specific DNA binding transcription factor activity;steroid hormone receptor activity;receptor activity;ligand-activated sequence-specific DNA binding RNA polymerase II transcription factor activity;9-cis retinoic acid receptor activity;steroid binding;protein binding;transcription factor binding;zinc ion binding;enzyme binding;vitamin D receptor bi…	1.05934e+07	123009
Rxra	true	false	false	negative regulation of transcription from RNA polymerase II promoter;heart morphogenesis;transcription, DNA-dependent;regulation of transcription, DNA-dependent;regulation of transcription from RNA polymerase II promoter;heart development;negative regulation of cell proliferation;negative regulation of gene expression;virus-host interaction;response to retinoic acid;peroxisome proliferator activa…	nuclear chromatin;nucleus;axon	DNA binding;double-stranded DNA binding;sequence-specific DNA binding transcription factor activity;steroid hormone receptor activity;receptor activity;ligand-activated sequence-specific DNA binding RNA polymerase II transcription factor activity;9-cis retinoic acid receptor activity;steroid binding;protein binding;transcription factor binding;zinc ion binding;enzyme binding;vitamin D receptor bi…	1.05934e+07	123009
Rxra	true	false	false	negative regulation of transcription from RNA polymerase II promoter;heart morphogenesis;transcription, DNA-dependent;regulation of transcription, DNA-dependent;regulation of transcription from RNA polymerase II promoter;heart development;negative regulation of cell proliferation;negative regulation of gene expression;virus-host interaction;response to retinoic acid;peroxisome proliferator activa…	nuclear chromatin;nucleus;axon	DNA binding;double-stranded DNA binding;sequence-specific DNA binding transcription factor activity;steroid hormone receptor activity;receptor activity;ligand-activated sequence-specific DNA binding RNA polymerase II transcription factor activity;9-cis retinoic acid receptor activity;steroid binding;protein binding;transcription factor binding;zinc ion binding;enzyme binding;vitamin D receptor bi…	1.05934e+07	123009
Rxra	true	false	false	negative regulation of transcription from RNA polymerase II promoter;heart morphogenesis;transcription, DNA-dependent;regulation of transcription, DNA-dependent;regulation of transcription from RNA polymerase II promoter;heart development;negative regulation of cell proliferation;negative regulation of gene expression;virus-host interaction;response to retinoic acid;peroxisome proliferator activa…	nuclear chromatin;nucleus;axon	DNA binding;double-stranded DNA binding;sequence-specific DNA binding transcription factor activity;steroid hormone receptor activity;receptor activity;ligand-activated sequence-specific DNA binding RNA polymerase II transcription factor activity;9-cis retinoic acid receptor activity;steroid binding;protein binding;transcription factor binding;zinc ion binding;enzyme binding;vitamin D receptor bi…	1.05934e+07	123009
Rxra	false	true	false	negative regulation of transcription from RNA polymerase II promoter;heart morphogenesis;transcription, DNA-dependent;regulation of transcription, DNA-dependent;regulation of transcription from RNA polymerase II promoter;heart development;negative regulation of cell proliferation;negative regulation of gene expression;virus-host interaction;response to retinoic acid;peroxisome proliferator activa…	nuclear chromatin;nucleus;axon	DNA binding;double-stranded DNA binding;sequence-specific DNA binding transcription factor activity;steroid hormone receptor activity;receptor activity;ligand-activated sequence-specific DNA binding RNA polymerase II transcription factor activity;9-cis retinoic acid receptor activity;steroid binding;protein binding;transcription factor binding;zinc ion binding;enzyme binding;vitamin D receptor bi…	1.05934e+07	123009
Rxra	false	false	true	negative regulation of transcription from RNA polymerase II promoter;heart morphogenesis;transcription, DNA-dependent;regulation of transcription, DNA-dependent;regulation of transcription from RNA polymerase II promoter;heart development;negative regulation of cell proliferation;negative regulation of gene expression;virus-host interaction;response to retinoic acid;peroxisome proliferator activa…	nuclear chromatin;nucleus;axon	DNA binding;double-stranded DNA binding;sequence-specific DNA binding transcription factor activity;steroid hormone receptor activity;receptor activity;ligand-activated sequence-specific DNA binding RNA polymerase II transcription factor activity;9-cis retinoic acid receptor activity;steroid binding;protein binding;transcription factor binding;zinc ion binding;enzyme binding;vitamin D receptor bi…	1.05934e+07	123009
Egr1	true	false	false	negative regulation of transcription from RNA polymerase II promoter;transcription, DNA-dependent;regulation of transcription, DNA-dependent;transcription from RNA polymerase II promoter;learning or memory;response to glucose stimulus;positive regulation of gene expression;positive regulation of cell death;T cell differentiation;BMP signaling pathway;response to insulin stimulus;regulation of pro…	intracellular;nucleus;cytoplasm	RNA polymerase II regulatory region sequence-specific DNA binding;RNA polymerase II core promoter sequence-specific DNA binding;RNA polymerase II core promoter proximal region sequence-specific DNA binding transcription factor activity;RNA polymerase II core promoter proximal region sequence-specific DNA binding transcription factor activity involved in positive regulation of transcription;nuclei…	452619	120698
Egr1	false	true	false	negative regulation of transcription from RNA polymerase II promoter;transcription, DNA-dependent;regulation of transcription, DNA-dependent;transcription from RNA polymerase II promoter;learning or memory;response to glucose stimulus;positive regulation of gene expression;positive regulation of cell death;T cell differentiation;BMP signaling pathway;response to insulin stimulus;regulation of pro…	intracellular;nucleus;cytoplasm	RNA polymerase II regulatory region sequence-specific DNA binding;RNA polymerase II core promoter sequence-specific DNA binding;RNA polymerase II core promoter proximal region sequence-specific DNA binding transcription factor activity;RNA polymerase II core promoter proximal region sequence-specific DNA binding transcription factor activity involved in positive regulation of transcription;nuclei…	452619	120698
Egr1	true	false	false	negative regulation of transcription from RNA polymerase II promoter;transcription, DNA-dependent;regulation of transcription, DNA-dependent;transcription from RNA polymerase II promoter;learning or memory;response to glucose stimulus;positive regulation of gene expression;positive regulation of cell death;T cell differentiation;BMP signaling pathway;response to insulin stimulus;regulation of pro…	intracellular;nucleus;cytoplasm	RNA polymerase II regulatory region sequence-specific DNA binding;RNA polymerase II core promoter sequence-specific DNA binding;RNA polymerase II core promoter proximal region sequence-specific DNA binding transcription factor activity;RNA polymerase II core promoter proximal region sequence-specific DNA binding transcription factor activity involved in positive regulation of transcription;nuclei…	452619	120698
Nr2f6	true	false	false	negative regulation of transcription from RNA polymerase II promoter;transcription, DNA-dependent;regulation of transcription, DNA-dependent;regulation of transcription from RNA polymerase II promoter;intracellular receptor mediated signaling pathway;entrainment of circadian clock by photoperiod;steroid hormone mediated signaling pathway;neuron development;detection of temperature stimulus involv…	nucleus	DNA binding;sequence-specific DNA binding transcription factor activity;steroid hormone receptor activity;receptor activity;ligand-activated sequence-specific DNA binding RNA polymerase II transcription factor activity;protein binding;zinc ion binding;sequence-specific DNA binding;metal ion binding	924161	117968
Hnf4a	false	true	false	transcription, DNA-dependent;regulation of transcription, DNA-dependent;regulation of transcription from RNA polymerase II promoter;ornithine metabolic process;lipid metabolic process;acyl-CoA metabolic process;xenobiotic metabolic process;establishment of tissue polarity;sex differentiation;blood coagulation;negative regulation of cell proliferation;response to glucose stimulus;regulation of gas…	nucleus;transcription factor complex;cytoplasm	fatty-acyl-CoA binding;RNA polymerase II core promoter proximal region sequence-specific DNA binding transcription factor activity involved in positive regulation of transcription;DNA binding;sequence-specific DNA binding transcription factor activity;sequence-specific distal enhancer binding RNA polymerase II transcription factor activity;steroid hormone receptor activity;receptor activity;ligan…	2.74514e+06	106732
Hnf4a	true	false	false	transcription, DNA-dependent;regulation of transcription, DNA-dependent;regulation of transcription from RNA polymerase II promoter;ornithine metabolic process;lipid metabolic process;acyl-CoA metabolic process;xenobiotic metabolic process;establishment of tissue polarity;sex differentiation;blood coagulation;negative regulation of cell proliferation;response to glucose stimulus;regulation of gas…	nucleus;transcription factor complex;cytoplasm	fatty-acyl-CoA binding;RNA polymerase II core promoter proximal region sequence-specific DNA binding transcription factor activity involved in positive regulation of transcription;DNA binding;sequence-specific DNA binding transcription factor activity;sequence-specific distal enhancer binding RNA polymerase II transcription factor activity;steroid hormone receptor activity;receptor activity;ligan…	2.74514e+06	106732
Hnf4a	false	false	true	transcription, DNA-dependent;regulation of transcription, DNA-dependent;regulation of transcription from RNA polymerase II promoter;ornithine metabolic process;lipid metabolic process;acyl-CoA metabolic process;xenobiotic metabolic process;establishment of tissue polarity;sex differentiation;blood coagulation;negative regulation of cell proliferation;response to glucose stimulus;regulation of gas…	nucleus;transcription factor complex;cytoplasm	fatty-acyl-CoA binding;RNA polymerase II core promoter proximal region sequence-specific DNA binding transcription factor activity involved in positive regulation of transcription;DNA binding;sequence-specific DNA binding transcription factor activity;sequence-specific distal enhancer binding RNA polymerase II transcription factor activity;steroid hormone receptor activity;receptor activity;ligan…	2.74514e+06	106732
Hnf4a	true	false	false	transcription, DNA-dependent;regulation of transcription, DNA-dependent;regulation of transcription from RNA polymerase II promoter;ornithine metabolic process;lipid metabolic process;acyl-CoA metabolic process;xenobiotic metabolic process;establishment of tissue polarity;sex differentiation;blood coagulation;negative regulation of cell proliferation;response to glucose stimulus;regulation of gas…	nucleus;transcription factor complex;cytoplasm	fatty-acyl-CoA binding;RNA polymerase II core promoter proximal region sequence-specific DNA binding transcription factor activity involved in positive regulation of transcription;DNA binding;sequence-specific DNA binding transcription factor activity;sequence-specific distal enhancer binding RNA polymerase II transcription factor activity;steroid hormone receptor activity;receptor activity;ligan…	2.74514e+06	106732
Hnf4a	false	false	false	transcription, DNA-dependent;regulation of transcription, DNA-dependent;regulation of transcription from RNA polymerase II promoter;ornithine metabolic process;lipid metabolic process;acyl-CoA metabolic process;xenobiotic metabolic process;establishment of tissue polarity;sex differentiation;blood coagulation;negative regulation of cell proliferation;response to glucose stimulus;regulation of gas…	nucleus;transcription factor complex;cytoplasm	fatty-acyl-CoA binding;RNA polymerase II core promoter proximal region sequence-specific DNA binding transcription factor activity involved in positive regulation of transcription;DNA binding;sequence-specific DNA binding transcription factor activity;sequence-specific distal enhancer binding RNA polymerase II transcription factor activity;steroid hormone receptor activity;receptor activity;ligan…	2.74514e+06	106732
Hnf4a	true	false	false	transcription, DNA-dependent;regulation of transcription, DNA-dependent;regulation of transcription from RNA polymerase II promoter;ornithine metabolic process;lipid metabolic process;acyl-CoA metabolic process;xenobiotic metabolic process;establishment of tissue polarity;sex differentiation;blood coagulation;negative regulation of cell proliferation;response to glucose stimulus;regulation of gas…	nucleus;transcription factor complex;cytoplasm	fatty-acyl-CoA binding;RNA polymerase II core promoter proximal region sequence-specific DNA binding transcription factor activity involved in positive regulation of transcription;DNA binding;sequence-specific DNA binding transcription factor activity;sequence-specific distal enhancer binding RNA polymerase II transcription factor activity;steroid hormone receptor activity;receptor activity;ligan…	2.74514e+06	106732
Foxa3	false	false	true	negative regulation of transcription from RNA polymerase II promoter;cellular glucose homeostasis;transcription, DNA-dependent;regulation of transcription, DNA-dependent;regulation of transcription from RNA polymerase II promoter;multicellular organismal development;spermatogenesis;brain development;negative regulation of cell proliferation;cellular response to starvation;embryo development;chrom…	nucleus;transcription factor complex;nuclear part	DNA binding;double-stranded DNA binding;sequence-specific DNA binding transcription factor activity;sequence-specific distal enhancer binding RNA polymerase II transcription factor activity;transcription factor binding;DNA binding, bending;protein domain specific binding;sequence-specific DNA binding;transcription regulatory region DNA binding	1.0599e+06	103334
Foxa3	true	false	false	negative regulation of transcription from RNA polymerase II promoter;cellular glucose homeostasis;transcription, DNA-dependent;regulation of transcription, DNA-dependent;regulation of transcription from RNA polymerase II promoter;multicellular organismal development;spermatogenesis;brain development;negative regulation of cell proliferation;cellular response to starvation;embryo development;chrom…	nucleus;transcription factor complex;nuclear part	DNA binding;double-stranded DNA binding;sequence-specific DNA binding transcription factor activity;sequence-specific distal enhancer binding RNA polymerase II transcription factor activity;transcription factor binding;DNA binding, bending;protein domain specific binding;sequence-specific DNA binding;transcription regulatory region DNA binding	1.0599e+06	103334
Bcl3	false	false	false	protein import into nucleus, translocation;follicular dendritic cell differentiation;marginal zone B cell differentiation;humoral immune response mediated by circulating immunoglobulin;germinal center formation;transcription, DNA-dependent;regulation of transcription, DNA-dependent;response to DNA damage stimulus;I-kappaB kinase/NF-kappaB cascade;response to virus;response to UV-C;antimicrobial h…	nucleus;cytoplasm;Bcl3-Bcl10 complex;Bcl3/NF-kappaB2 complex;protein complex	DNA binding;sequence-specific DNA binding transcription factor activity;protein binding;transcription factor binding	1.47463e+06	103164
Bcl3	false	false	true	protein import into nucleus, translocation;follicular dendritic cell differentiation;marginal zone B cell differentiation;humoral immune response mediated by circulating immunoglobulin;germinal center formation;transcription, DNA-dependent;regulation of transcription, DNA-dependent;response to DNA damage stimulus;I-kappaB kinase/NF-kappaB cascade;response to virus;response to UV-C;antimicrobial h…	nucleus;cytoplasm;Bcl3-Bcl10 complex;Bcl3/NF-kappaB2 complex;protein complex	DNA binding;sequence-specific DNA binding transcription factor activity;protein binding;transcription factor binding	1.47463e+06	103164
Bcl3	true	false	false	protein import into nucleus, translocation;follicular dendritic cell differentiation;marginal zone B cell differentiation;humoral immune response mediated by circulating immunoglobulin;germinal center formation;transcription, DNA-dependent;regulation of transcription, DNA-dependent;response to DNA damage stimulus;I-kappaB kinase/NF-kappaB cascade;response to virus;response to UV-C;antimicrobial h…	nucleus;cytoplasm;Bcl3-Bcl10 complex;Bcl3/NF-kappaB2 complex;protein complex	DNA binding;sequence-specific DNA binding transcription factor activity;protein binding;transcription factor binding	1.47463e+06	103164
Tgif1	true	false	false	negative regulation of transcription from RNA polymerase II promoter;neural tube closure;transcription, DNA-dependent;regulation of transcription, DNA-dependent;determination of left/right symmetry;negative regulation of cell proliferation;dorsal/ventral pattern formation;negative regulation of gene expression;positive regulation of neuron differentiation;positive regulation of fibroblast prolife…	nucleus	DNA binding;chromatin binding;sequence-specific DNA binding transcription factor activity;protein binding;JUN kinase binding;sequence-specific DNA binding;co-SMAD binding	903823	96893.5
Creb3l3	true	false	false	transcription, DNA-dependent;regulation of transcription, DNA-dependent;response to unfolded protein	nucleus;endoplasmic reticulum;membrane;integral to membrane	DNA binding;sequence-specific DNA binding transcription factor activity;sequence-specific DNA binding;protein dimerization activity	1.3686e+06	94126.4
Creb3l3	true	false	false	transcription, DNA-dependent;regulation of transcription, DNA-dependent;response to unfolded protein	nucleus;endoplasmic reticulum;membrane;integral to membrane	DNA binding;sequence-specific DNA binding transcription factor activity;sequence-specific DNA binding;protein dimerization activity	1.3686e+06	94126.4
Creb3l3	true	false	false	transcription, DNA-dependent;regulation of transcription, DNA-dependent;response to unfolded protein	nucleus;endoplasmic reticulum;membrane;integral to membrane	DNA binding;sequence-specific DNA binding transcription factor activity;sequence-specific DNA binding;protein dimerization activity	1.3686e+06	94126.4
Creb3l3	false	true	false	transcription, DNA-dependent;regulation of transcription, DNA-dependent;response to unfolded protein	nucleus;endoplasmic reticulum;membrane;integral to membrane	DNA binding;sequence-specific DNA binding transcription factor activity;sequence-specific DNA binding;protein dimerization activity	1.3686e+06	94126.4
Atf5	false	true	false	transcription, DNA-dependent;regulation of transcription, DNA-dependent;regulation of transcription from RNA polymerase II promoter;anti-apoptosis;regulation of cell proliferation;negative regulation of astrocyte differentiation;negative regulation of neurogenesis;regulation of cell cycle	nucleus;transcription factor complex;cytoplasm	DNA binding;sequence-specific DNA binding transcription factor activity;sequence-specific DNA binding;protein dimerization activity	403650	91676.2
Atf5	false	true	false	transcription, DNA-dependent;regulation of transcription, DNA-dependent;regulation of transcription from RNA polymerase II promoter;anti-apoptosis;regulation of cell proliferation;negative regulation of astrocyte differentiation;negative regulation of neurogenesis;regulation of cell cycle	nucleus;transcription factor complex;cytoplasm	DNA binding;sequence-specific DNA binding transcription factor activity;sequence-specific DNA binding;protein dimerization activity	403650	91676.2
Atf5	false	true	false	transcription, DNA-dependent;regulation of transcription, DNA-dependent;regulation of transcription from RNA polymerase II promoter;anti-apoptosis;regulation of cell proliferation;negative regulation of astrocyte differentiation;negative regulation of neurogenesis;regulation of cell cycle	nucleus;transcription factor complex;cytoplasm	DNA binding;sequence-specific DNA binding transcription factor activity;sequence-specific DNA binding;protein dimerization activity	403650	91676.2
Atf5	true	false	false	transcription, DNA-dependent;regulation of transcription, DNA-dependent;regulation of transcription from RNA polymerase II promoter;anti-apoptosis;regulation of cell proliferation;negative regulation of astrocyte differentiation;negative regulation of neurogenesis;regulation of cell cycle	nucleus;transcription factor complex;cytoplasm	DNA binding;sequence-specific DNA binding transcription factor activity;sequence-specific DNA binding;protein dimerization activity	403650	91676.2
Atf5	false	true	false	transcription, DNA-dependent;regulation of transcription, DNA-dependent;regulation of transcription from RNA polymerase II promoter;anti-apoptosis;regulation of cell proliferation;negative regulation of astrocyte differentiation;negative regulation of neurogenesis;regulation of cell cycle	nucleus;transcription factor complex;cytoplasm	DNA binding;sequence-specific DNA binding transcription factor activity;sequence-specific DNA binding;protein dimerization activity	403650	91676.2
Bhlhe40	true	false	false	negative regulation of transcription from RNA polymerase II promoter;transcription, DNA-dependent;regulation of transcription, DNA-dependent;entrainment of circadian clock;circadian regulation of gene expression;negative regulation of sequence-specific DNA binding transcription factor activity;negative regulation of transcription, DNA-dependent	nucleus;nucleolus;Golgi apparatus	RNA polymerase II core promoter proximal region sequence-specific DNA binding transcription factor activity involved in negative regulation of transcription;RNA polymerase II transcription factor binding transcription factor activity involved in negative regulation of transcription;DNA binding;sequence-specific distal enhancer binding RNA polymerase II transcription factor activity;protein bindin…	535699	85072.1
Srebf1	true	false	false	negative regulation of transcription from RNA polymerase II promoter;regulation of heart rate by chemical signal;transcription, DNA-dependent;regulation of transcription, DNA-dependent;lipid metabolic process;steroid metabolic process;cholesterol metabolic process;insulin receptor signaling pathway;lipid biosynthetic process;cellular response to starvation;response to glucose stimulus;positive re…	nucleus;cytoplasm;endoplasmic reticulum;microsome;Golgi apparatus;membrane;integral to membrane;cytoplasmic vesicle;protein complex;cytoplasmic part	DNA binding;chromatin binding;sequence-specific DNA binding transcription factor activity;protein binding;protein kinase binding;protein complex binding;sterol response element binding;sequence-specific DNA binding	1.56016e+06	72511.8
Srebf1	true	false	false	negative regulation of transcription from RNA polymerase II promoter;regulation of heart rate by chemical signal;transcription, DNA-dependent;regulation of transcription, DNA-dependent;lipid metabolic process;steroid metabolic process;cholesterol metabolic process;insulin receptor signaling pathway;lipid biosynthetic process;cellular response to starvation;response to glucose stimulus;positive re…	nucleus;cytoplasm;endoplasmic reticulum;microsome;Golgi apparatus;membrane;integral to membrane;cytoplasmic vesicle;protein complex;cytoplasmic part	DNA binding;chromatin binding;sequence-specific DNA binding transcription factor activity;protein binding;protein kinase binding;protein complex binding;sterol response element binding;sequence-specific DNA binding	1.56016e+06	72511.8
Srebf1	false	true	false	negative regulation of transcription from RNA polymerase II promoter;regulation of heart rate by chemical signal;transcription, DNA-dependent;regulation of transcription, DNA-dependent;lipid metabolic process;steroid metabolic process;cholesterol metabolic process;insulin receptor signaling pathway;lipid biosynthetic process;cellular response to starvation;response to glucose stimulus;positive re…	nucleus;cytoplasm;endoplasmic reticulum;microsome;Golgi apparatus;membrane;integral to membrane;cytoplasmic vesicle;protein complex;cytoplasmic part	DNA binding;chromatin binding;sequence-specific DNA binding transcription factor activity;protein binding;protein kinase binding;protein complex binding;sterol response element binding;sequence-specific DNA binding	1.56016e+06	72511.8
Srebf1	true	false	false	negative regulation of transcription from RNA polymerase II promoter;regulation of heart rate by chemical signal;transcription, DNA-dependent;regulation of transcription, DNA-dependent;lipid metabolic process;steroid metabolic process;cholesterol metabolic process;insulin receptor signaling pathway;lipid biosynthetic process;cellular response to starvation;response to glucose stimulus;positive re…	nucleus;cytoplasm;endoplasmic reticulum;microsome;Golgi apparatus;membrane;integral to membrane;cytoplasmic vesicle;protein complex;cytoplasmic part	DNA binding;chromatin binding;sequence-specific DNA binding transcription factor activity;protein binding;protein kinase binding;protein complex binding;sterol response element binding;sequence-specific DNA binding	1.56016e+06	72511.8
Usf2	true	false	false	positive regulation of transcription from RNA polymerase II promoter by glucose;transcription, DNA-dependent;regulation of transcription, DNA-dependent;regulation of transcription from RNA polymerase II promoter;lactation;positive regulation of transcription, DNA-dependent;positive regulation of transcription from RNA polymerase II promoter;lipid homeostasis	nucleus	RNA polymerase II core promoter proximal region sequence-specific DNA binding;DNA binding;double-stranded DNA binding;sequence-specific DNA binding transcription factor activity;sequence-specific distal enhancer binding RNA polymerase II transcription factor activity;protein homodimerization activity;bHLH transcription factor binding;sequence-specific DNA binding;protein heterodimerization activi…	831622	71964.6
Klf13	true	false	false	transcription, DNA-dependent;regulation of transcription, DNA-dependent;regulation of transcription from RNA polymerase II promoter;transcription from RNA polymerase II promoter;negative regulation of cell proliferation;negative regulation of erythrocyte differentiation;positive regulation of transcription from RNA polymerase II promoter	intracellular;nucleus	nucleic acid binding;DNA binding;zinc ion binding;metal ion binding	3.77741e+06	71861.6
Klf13	true	false	false	transcription, DNA-dependent;regulation of transcription, DNA-dependent;regulation of transcription from RNA polymerase II promoter;transcription from RNA polymerase II promoter;negative regulation of cell proliferation;negative regulation of erythrocyte differentiation;positive regulation of transcription from RNA polymerase II promoter	intracellular;nucleus	nucleic acid binding;DNA binding;zinc ion binding;metal ion binding	3.77741e+06	71861.6
Klf13	true	false	false	transcription, DNA-dependent;regulation of transcription, DNA-dependent;regulation of transcription from RNA polymerase II promoter;transcription from RNA polymerase II promoter;negative regulation of cell proliferation;negative regulation of erythrocyte differentiation;positive regulation of transcription from RNA polymerase II promoter	intracellular;nucleus	nucleic acid binding;DNA binding;zinc ion binding;metal ion binding	3.77741e+06	71861.6
Klf13	false	true	false	transcription, DNA-dependent;regulation of transcription, DNA-dependent;regulation of transcription from RNA polymerase II promoter;transcription from RNA polymerase II promoter;negative regulation of cell proliferation;negative regulation of erythrocyte differentiation;positive regulation of transcription from RNA polymerase II promoter	intracellular;nucleus	nucleic acid binding;DNA binding;zinc ion binding;metal ion binding	3.77741e+06	71861.6
Bcl6	false	true	false	protein import into nucleus, translocation;negative regulation of transcription from RNA polymerase II promoter;cell morphogenesis;negative regulation of cell-matrix adhesion;germinal center formation;negative regulation of type 2 immune response;transcription, DNA-dependent;regulation of transcription, DNA-dependent;response to DNA damage stimulus;Rho protein signal transduction;spermatogenesis;…	intracellular;nucleus	nucleic acid binding;DNA binding;chromatin binding;sequence-specific DNA binding transcription factor activity;protein binding;zinc ion binding;chromatin DNA binding;sequence-specific DNA binding;metal ion binding	1.68466e+06	71502.2
Bcl6	false	true	false	protein import into nucleus, translocation;negative regulation of transcription from RNA polymerase II promoter;cell morphogenesis;negative regulation of cell-matrix adhesion;germinal center formation;negative regulation of type 2 immune response;transcription, DNA-dependent;regulation of transcription, DNA-dependent;response to DNA damage stimulus;Rho protein signal transduction;spermatogenesis;…	intracellular;nucleus	nucleic acid binding;DNA binding;chromatin binding;sequence-specific DNA binding transcription factor activity;protein binding;zinc ion binding;chromatin DNA binding;sequence-specific DNA binding;metal ion binding	1.68466e+06	71502.2
Bcl6	false	false	true	protein import into nucleus, translocation;negative regulation of transcription from RNA polymerase II promoter;cell morphogenesis;negative regulation of cell-matrix adhesion;germinal center formation;negative regulation of type 2 immune response;transcription, DNA-dependent;regulation of transcription, DNA-dependent;response to DNA damage stimulus;Rho protein signal transduction;spermatogenesis;…	intracellular;nucleus	nucleic acid binding;DNA binding;chromatin binding;sequence-specific DNA binding transcription factor activity;protein binding;zinc ion binding;chromatin DNA binding;sequence-specific DNA binding;metal ion binding	1.68466e+06	71502.2
Bcl6	true	false	false	protein import into nucleus, translocation;negative regulation of transcription from RNA polymerase II promoter;cell morphogenesis;negative regulation of cell-matrix adhesion;germinal center formation;negative regulation of type 2 immune response;transcription, DNA-dependent;regulation of transcription, DNA-dependent;response to DNA damage stimulus;Rho protein signal transduction;spermatogenesis;…	intracellular;nucleus	nucleic acid binding;DNA binding;chromatin binding;sequence-specific DNA binding transcription factor activity;protein binding;zinc ion binding;chromatin DNA binding;sequence-specific DNA binding;metal ion binding	1.68466e+06	71502.2
Bcl6	false	true	false	protein import into nucleus, translocation;negative regulation of transcription from RNA polymerase II promoter;cell morphogenesis;negative regulation of cell-matrix adhesion;germinal center formation;negative regulation of type 2 immune response;transcription, DNA-dependent;regulation of transcription, DNA-dependent;response to DNA damage stimulus;Rho protein signal transduction;spermatogenesis;…	intracellular;nucleus	nucleic acid binding;DNA binding;chromatin binding;sequence-specific DNA binding transcription factor activity;protein binding;zinc ion binding;chromatin DNA binding;sequence-specific DNA binding;metal ion binding	1.68466e+06	71502.2
Bcl6	true	false	false	protein import into nucleus, translocation;negative regulation of transcription from RNA polymerase II promoter;cell morphogenesis;negative regulation of cell-matrix adhesion;germinal center formation;negative regulation of type 2 immune response;transcription, DNA-dependent;regulation of transcription, DNA-dependent;response to DNA damage stimulus;Rho protein signal transduction;spermatogenesis;…	intracellular;nucleus	nucleic acid binding;DNA binding;chromatin binding;sequence-specific DNA binding transcription factor activity;protein binding;zinc ion binding;chromatin DNA binding;sequence-specific DNA binding;metal ion binding	1.68466e+06	71502.2
Bcl6	false	true	false	protein import into nucleus, translocation;negative regulation of transcription from RNA polymerase II promoter;cell morphogenesis;negative regulation of cell-matrix adhesion;germinal center formation;negative regulation of type 2 immune response;transcription, DNA-dependent;regulation of transcription, DNA-dependent;response to DNA damage stimulus;Rho protein signal transduction;spermatogenesis;…	intracellular;nucleus	nucleic acid binding;DNA binding;chromatin binding;sequence-specific DNA binding transcription factor activity;protein binding;zinc ion binding;chromatin DNA binding;sequence-specific DNA binding;metal ion binding	1.68466e+06	71502.2
Bcl6	false	false	true	protein import into nucleus, translocation;negative regulation of transcription from RNA polymerase II promoter;cell morphogenesis;negative regulation of cell-matrix adhesion;germinal center formation;negative regulation of type 2 immune response;transcription, DNA-dependent;regulation of transcription, DNA-dependent;response to DNA damage stimulus;Rho protein signal transduction;spermatogenesis;…	intracellular;nucleus	nucleic acid binding;DNA binding;chromatin binding;sequence-specific DNA binding transcription factor activity;protein binding;zinc ion binding;chromatin DNA binding;sequence-specific DNA binding;metal ion binding	1.68466e+06	71502.2
Bcl6	false	false	false	protein import into nucleus, translocation;negative regulation of transcription from RNA polymerase II promoter;cell morphogenesis;negative regulation of cell-matrix adhesion;germinal center formation;negative regulation of type 2 immune response;transcription, DNA-dependent;regulation of transcription, DNA-dependent;response to DNA damage stimulus;Rho protein signal transduction;spermatogenesis;…	intracellular;nucleus	nucleic acid binding;DNA binding;chromatin binding;sequence-specific DNA binding transcription factor activity;protein binding;zinc ion binding;chromatin DNA binding;sequence-specific DNA binding;metal ion binding	1.68466e+06	71502.2
Foxq1	false	false	true	negative regulation of transcription from RNA polymerase II promoter;DNA fragmentation involved in apoptotic nuclear change;transcription, DNA-dependent;regulation of transcription, DNA-dependent;pattern specification process;embryo development;hair follicle morphogenesis;positive regulation of cysteine-type endopeptidase activity involved in apoptotic process;positive regulation of transcription…	nucleus;transcription factor complex	DNA binding;double-stranded DNA binding;sequence-specific DNA binding transcription factor activity;sequence-specific distal enhancer binding RNA polymerase II transcription factor activity;transcription factor binding;DNA binding, bending;estrogen receptor binding;ubiquitin conjugating enzyme binding;cysteine-type endopeptidase regulator activity involved in apoptotic process;sequence-specific D…	198843	70888.7
Foxq1	true	false	false	negative regulation of transcription from RNA polymerase II promoter;DNA fragmentation involved in apoptotic nuclear change;transcription, DNA-dependent;regulation of transcription, DNA-dependent;pattern specification process;embryo development;hair follicle morphogenesis;positive regulation of cysteine-type endopeptidase activity involved in apoptotic process;positive regulation of transcription…	nucleus;transcription factor complex	DNA binding;double-stranded DNA binding;sequence-specific DNA binding transcription factor activity;sequence-specific distal enhancer binding RNA polymerase II transcription factor activity;transcription factor binding;DNA binding, bending;estrogen receptor binding;ubiquitin conjugating enzyme binding;cysteine-type endopeptidase regulator activity involved in apoptotic process;sequence-specific D…	198843	70888.7
Foxq1	false	false	true	negative regulation of transcription from RNA polymerase II promoter;DNA fragmentation involved in apoptotic nuclear change;transcription, DNA-dependent;regulation of transcription, DNA-dependent;pattern specification process;embryo development;hair follicle morphogenesis;positive regulation of cysteine-type endopeptidase activity involved in apoptotic process;positive regulation of transcription…	nucleus;transcription factor complex	DNA binding;double-stranded DNA binding;sequence-specific DNA binding transcription factor activity;sequence-specific distal enhancer binding RNA polymerase II transcription factor activity;transcription factor binding;DNA binding, bending;estrogen receptor binding;ubiquitin conjugating enzyme binding;cysteine-type endopeptidase regulator activity involved in apoptotic process;sequence-specific D…	198843	70888.7
Foxq1	false	false	true	negative regulation of transcription from RNA polymerase II promoter;DNA fragmentation involved in apoptotic nuclear change;transcription, DNA-dependent;regulation of transcription, DNA-dependent;pattern specification process;embryo development;hair follicle morphogenesis;positive regulation of cysteine-type endopeptidase activity involved in apoptotic process;positive regulation of transcription…	nucleus;transcription factor complex	DNA binding;double-stranded DNA binding;sequence-specific DNA binding transcription factor activity;sequence-specific distal enhancer binding RNA polymerase II transcription factor activity;transcription factor binding;DNA binding, bending;estrogen receptor binding;ubiquitin conjugating enzyme binding;cysteine-type endopeptidase regulator activity involved in apoptotic process;sequence-specific D…	198843	70888.7
Foxq1	false	false	false	negative regulation of transcription from RNA polymerase II promoter;DNA fragmentation involved in apoptotic nuclear change;transcription, DNA-dependent;regulation of transcription, DNA-dependent;pattern specification process;embryo development;hair follicle morphogenesis;positive regulation of cysteine-type endopeptidase activity involved in apoptotic process;positive regulation of transcription…	nucleus;transcription factor complex	DNA binding;double-stranded DNA binding;sequence-specific DNA binding transcription factor activity;sequence-specific distal enhancer binding RNA polymerase II transcription factor activity;transcription factor binding;DNA binding, bending;estrogen receptor binding;ubiquitin conjugating enzyme binding;cysteine-type endopeptidase regulator activity involved in apoptotic process;sequence-specific D…	198843	70888.7
Foxq1	false	false	true	negative regulation of transcription from RNA polymerase II promoter;DNA fragmentation involved in apoptotic nuclear change;transcription, DNA-dependent;regulation of transcription, DNA-dependent;pattern specification process;embryo development;hair follicle morphogenesis;positive regulation of cysteine-type endopeptidase activity involved in apoptotic process;positive regulation of transcription…	nucleus;transcription factor complex	DNA binding;double-stranded DNA binding;sequence-specific DNA binding transcription factor activity;sequence-specific distal enhancer binding RNA polymerase II transcription factor activity;transcription factor binding;DNA binding, bending;estrogen receptor binding;ubiquitin conjugating enzyme binding;cysteine-type endopeptidase regulator activity involved in apoptotic process;sequence-specific D…	198843	70888.7
Irf2bp1	true	false	false	negative regulation of transcription from RNA polymerase II promoter;transcription, DNA-dependent;regulation of transcription, DNA-dependent	nucleus	transcription corepressor activity;transcription factor binding	190354	70527.5
Zfp213	false	false	false	transcription, DNA-dependent;regulation of transcription, DNA-dependent;biological_process	cellular_component;nucleus	molecular_function;metal ion binding	489991	65682.4
Lpin1	false	true	false	negative regulation of transcription from RNA polymerase II promoter;mitochondrial fission;transcription, DNA-dependent;regulation of transcription, DNA-dependent;lipid metabolic process;triglyceride mobilization;fatty acid catabolic process;positive regulation of histone deacetylation;ruffle organization;actin cytoskeleton reorganization;cellular response to insulin stimulus;fat cell differentia…	nucleus;transcription factor complex;cytoplasm;mitochondrion;mitochondrial outer membrane;endoplasmic reticulum;membrane	RNA polymerase II transcription factor binding;transcription coactivator activity;protein binding;phosphatidate phosphatase activity;hydrolase activity;histone deacetylase binding;peroxisome proliferator activated receptor binding	3.45145e+06	63795.3
Nr0b2	true	false	false	negative regulation of transcription from RNA polymerase II promoter;transcription, DNA-dependent;regulation of transcription, DNA-dependent;response to glucose stimulus;positive regulation of insulin secretion;steroid hormone mediated signaling pathway;negative regulation of sequence-specific DNA binding transcription factor activity;negative regulation of transcription, DNA-dependent	nucleus;cytoplasm;protein complex	DNA binding;sequence-specific DNA binding transcription factor activity;steroid hormone receptor activity;transcription corepressor activity;receptor activity;protein binding;transcription factor binding;protein domain specific binding;protein complex binding;protein homodimerization activity;retinoic acid receptor binding;peroxisome proliferator activated receptor binding;retinoid X receptor bin…	196120	62319.8
Nr0b2	false	true	false	negative regulation of transcription from RNA polymerase II promoter;transcription, DNA-dependent;regulation of transcription, DNA-dependent;response to glucose stimulus;positive regulation of insulin secretion;steroid hormone mediated signaling pathway;negative regulation of sequence-specific DNA binding transcription factor activity;negative regulation of transcription, DNA-dependent	nucleus;cytoplasm;protein complex	DNA binding;sequence-specific DNA binding transcription factor activity;steroid hormone receptor activity;transcription corepressor activity;receptor activity;protein binding;transcription factor binding;protein domain specific binding;protein complex binding;protein homodimerization activity;retinoic acid receptor binding;peroxisome proliferator activated receptor binding;retinoid X receptor bin…	196120	62319.8
Nr0b2	true	false	false	negative regulation of transcription from RNA polymerase II promoter;transcription, DNA-dependent;regulation of transcription, DNA-dependent;response to glucose stimulus;positive regulation of insulin secretion;steroid hormone mediated signaling pathway;negative regulation of sequence-specific DNA binding transcription factor activity;negative regulation of transcription, DNA-dependent	nucleus;cytoplasm;protein complex	DNA binding;sequence-specific DNA binding transcription factor activity;steroid hormone receptor activity;transcription corepressor activity;receptor activity;protein binding;transcription factor binding;protein domain specific binding;protein complex binding;protein homodimerization activity;retinoic acid receptor binding;peroxisome proliferator activated receptor binding;retinoid X receptor bin…	196120	62319.8
Nr0b2	true	false	false	negative regulation of transcription from RNA polymerase II promoter;transcription, DNA-dependent;regulation of transcription, DNA-dependent;response to glucose stimulus;positive regulation of insulin secretion;steroid hormone mediated signaling pathway;negative regulation of sequence-specific DNA binding transcription factor activity;negative regulation of transcription, DNA-dependent	nucleus;cytoplasm;protein complex	DNA binding;sequence-specific DNA binding transcription factor activity;steroid hormone receptor activity;transcription corepressor activity;receptor activity;protein binding;transcription factor binding;protein domain specific binding;protein complex binding;protein homodimerization activity;retinoic acid receptor binding;peroxisome proliferator activated receptor binding;retinoid X receptor bin…	196120	62319.8
Zfp672	true	false	false	transcription, DNA-dependent;regulation of transcription, DNA-dependent;biological_process	cellular_component;intracellular;nucleus	molecular_function;nucleic acid binding;DNA binding;zinc ion binding;metal ion binding	510887	62053.6
Onecut1	true	false	false	liver development;regulation of cell-matrix adhesion;epithelial cell development;glucose metabolic process;transcription, DNA-dependent;regulation of transcription, DNA-dependent;regulation of transcription from RNA polymerase II promoter;endoderm development;anatomical structure morphogenesis;cell differentiation;B cell differentiation;positive regulation of cell migration;negative regulation of…	nucleus	RNA polymerase II core promoter proximal region sequence-specific DNA binding transcription factor activity involved in positive regulation of transcription;DNA binding;sequence-specific DNA binding transcription factor activity;sequence-specific distal enhancer binding RNA polymerase II transcription factor activity;sequence-specific DNA binding	1.67164e+06	60289.3
Onecut1	false	true	false	liver development;regulation of cell-matrix adhesion;epithelial cell development;glucose metabolic process;transcription, DNA-dependent;regulation of transcription, DNA-dependent;regulation of transcription from RNA polymerase II promoter;endoderm development;anatomical structure morphogenesis;cell differentiation;B cell differentiation;positive regulation of cell migration;negative regulation of…	nucleus	RNA polymerase II core promoter proximal region sequence-specific DNA binding transcription factor activity involved in positive regulation of transcription;DNA binding;sequence-specific DNA binding transcription factor activity;sequence-specific distal enhancer binding RNA polymerase II transcription factor activity;sequence-specific DNA binding	1.67164e+06	60289.3
Onecut1	false	true	false	liver development;regulation of cell-matrix adhesion;epithelial cell development;glucose metabolic process;transcription, DNA-dependent;regulation of transcription, DNA-dependent;regulation of transcription from RNA polymerase II promoter;endoderm development;anatomical structure morphogenesis;cell differentiation;B cell differentiation;positive regulation of cell migration;negative regulation of…	nucleus	RNA polymerase II core promoter proximal region sequence-specific DNA binding transcription factor activity involved in positive regulation of transcription;DNA binding;sequence-specific DNA binding transcription factor activity;sequence-specific distal enhancer binding RNA polymerase II transcription factor activity;sequence-specific DNA binding	1.67164e+06	60289.3
Onecut1	false	false	false	liver development;regulation of cell-matrix adhesion;epithelial cell development;glucose metabolic process;transcription, DNA-dependent;regulation of transcription, DNA-dependent;regulation of transcription from RNA polymerase II promoter;endoderm development;anatomical structure morphogenesis;cell differentiation;B cell differentiation;positive regulation of cell migration;negative regulation of…	nucleus	RNA polymerase II core promoter proximal region sequence-specific DNA binding transcription factor activity involved in positive regulation of transcription;DNA binding;sequence-specific DNA binding transcription factor activity;sequence-specific distal enhancer binding RNA polymerase II transcription factor activity;sequence-specific DNA binding	1.67164e+06	60289.3
Hhex	true	false	false	negative regulation of transcription from RNA polymerase II promoter;vasculogenesis;in utero embryonic development;liver development;morphogenesis of an epithelium;myeloid leukocyte differentiation;transcription, DNA-dependent;regulation of transcription, DNA-dependent;regulation of transcription from RNA polymerase II promoter;mRNA export from nucleus;cell cycle;signal transduction;multicellular…	nucleus;cytoplasm;protein-DNA complex	DNA binding;chromatin binding;sequence-specific DNA binding transcription factor activity;transcription factor binding;eukaryotic initiation factor 4E binding;DNA binding, bending;protein homodimerization activity;sequence-specific DNA binding;transcription regulatory region DNA binding;repressing transcription factor binding;HMG box domain binding	354327	60147.2
Hhex	false	false	true	negative regulation of transcription from RNA polymerase II promoter;vasculogenesis;in utero embryonic development;liver development;morphogenesis of an epithelium;myeloid leukocyte differentiation;transcription, DNA-dependent;regulation of transcription, DNA-dependent;regulation of transcription from RNA polymerase II promoter;mRNA export from nucleus;cell cycle;signal transduction;multicellular…	nucleus;cytoplasm;protein-DNA complex	DNA binding;chromatin binding;sequence-specific DNA binding transcription factor activity;transcription factor binding;eukaryotic initiation factor 4E binding;DNA binding, bending;protein homodimerization activity;sequence-specific DNA binding;transcription regulatory region DNA binding;repressing transcription factor binding;HMG box domain binding	354327	60147.2
Nfe2l1	false	true	false	regulation of transcription, DNA-dependent	nucleus	DNA binding;sequence-specific DNA binding transcription factor activity;protein binding;sequence-specific DNA binding;protein dimerization activity	749237	59676.4
Zbtb48	true	false	false	transcription, DNA-dependent;regulation of transcription, DNA-dependent;biological_process	intracellular;nucleus;cytoplasm	molecular_function;nucleic acid binding;DNA binding;zinc ion binding;metal ion binding	461981	58508.2
Zbtb48	true	false	false	transcription, DNA-dependent;regulation of transcription, DNA-dependent;biological_process	intracellular;nucleus;cytoplasm	molecular_function;nucleic acid binding;DNA binding;zinc ion binding;metal ion binding	461981	58508.2
Mbd3	true	false	false	negative regulation of transcription from RNA polymerase II promoter;in utero embryonic development;methylation-dependent chromatin silencing;transcription, DNA-dependent;regulation of transcription, DNA-dependent;tissue development;histone acetylation	chromatin;heterochromatin;nucleus;nucleolus;cytoplasm;NuRD complex;protein complex	DNA binding;chromatin binding;protein binding	398380	57411.8
Cebpd	false	true	false	transcription, DNA-dependent;regulation of transcription, DNA-dependent;regulation of transcription from RNA polymerase II promoter;fat cell differentiation;positive regulation of osteoblast differentiation;negative regulation of transcription, DNA-dependent;positive regulation of transcription from RNA polymerase II promoter;inner ear development	nucleus	DNA binding;sequence-specific DNA binding transcription factor activity;protein binding;protein homodimerization activity;sequence-specific DNA binding;transcription regulatory region DNA binding;protein heterodimerization activity;protein dimerization activity	125117	55361.6
Smarcd2	true	false	false	nucleosome disassembly;chromatin remodeling;transcription, DNA-dependent;regulation of transcription, DNA-dependent;chromatin modification	nucleus;SWI/SNF complex	molecular_function	532660	54342
Smarcd2	true	false	false	nucleosome disassembly;chromatin remodeling;transcription, DNA-dependent;regulation of transcription, DNA-dependent;chromatin modification	nucleus;SWI/SNF complex	molecular_function	532660	54342
Smarcd2	true	false	false	nucleosome disassembly;chromatin remodeling;transcription, DNA-dependent;regulation of transcription, DNA-dependent;chromatin modification	nucleus;SWI/SNF complex	molecular_function	532660	54342
Per1	true	false	false	negative regulation of transcription from RNA polymerase II promoter;transcription, DNA-dependent;regulation of transcription, DNA-dependent;signal transduction;circadian rhythm;circadian regulation of gene expression;negative regulation of transcription, DNA-dependent;rhythmic process	nucleus;cytoplasm	RNA polymerase II core promoter proximal region sequence-specific DNA binding;protein binding transcription factor activity;signal transducer activity;protein binding;E-box binding	579547	52676.5
Per1	true	false	false	negative regulation of transcription from RNA polymerase II promoter;transcription, DNA-dependent;regulation of transcription, DNA-dependent;signal transduction;circadian rhythm;circadian regulation of gene expression;negative regulation of transcription, DNA-dependent;rhythmic process	nucleus;cytoplasm	RNA polymerase II core promoter proximal region sequence-specific DNA binding;protein binding transcription factor activity;signal transducer activity;protein binding;E-box binding	579547	52676.5
Per1	true	false	false	negative regulation of transcription from RNA polymerase II promoter;transcription, DNA-dependent;regulation of transcription, DNA-dependent;signal transduction;circadian rhythm;circadian regulation of gene expression;negative regulation of transcription, DNA-dependent;rhythmic process	nucleus;cytoplasm	RNA polymerase II core promoter proximal region sequence-specific DNA binding;protein binding transcription factor activity;signal transducer activity;protein binding;E-box binding	579547	52676.5
Cnbp	false	false	true	transcription, DNA-dependent;regulation of transcription, DNA-dependent;positive regulation of cell proliferation;positive regulation of transcription, DNA-dependent;positive regulation of transcription from RNA polymerase II promoter	nucleus;cytoplasm;endoplasmic reticulum;cytosol	nucleic acid binding;DNA binding;single-stranded DNA binding;single-stranded RNA binding;zinc ion binding;metal ion binding	446244	52548.7
Cnbp	false	false	false	transcription, DNA-dependent;regulation of transcription, DNA-dependent;positive regulation of cell proliferation;positive regulation of transcription, DNA-dependent;positive regulation of transcription from RNA polymerase II promoter	nucleus;cytoplasm;endoplasmic reticulum;cytosol	nucleic acid binding;DNA binding;single-stranded DNA binding;single-stranded RNA binding;zinc ion binding;metal ion binding	446244	52548.7
Cbx4	true	false	false	negative regulation of transcription from RNA polymerase II promoter;transcription, DNA-dependent;regulation of transcription, DNA-dependent;chromatin modification;negative regulation of transcription, DNA-dependent	nucleus;cytoplasm;Golgi apparatus;PcG protein complex;PRC1 complex	chromatin binding;single-stranded RNA binding;enzyme binding;methylated histone residue binding;phosphoprotein binding	454764	52470.8
Cbx4	true	false	false	negative regulation of transcription from RNA polymerase II promoter;transcription, DNA-dependent;regulation of transcription, DNA-dependent;chromatin modification;negative regulation of transcription, DNA-dependent	nucleus;cytoplasm;Golgi apparatus;PcG protein complex;PRC1 complex	chromatin binding;single-stranded RNA binding;enzyme binding;methylated histone residue binding;phosphoprotein binding	454764	52470.8
Cbx4	false	true	false	negative regulation of transcription from RNA polymerase II promoter;transcription, DNA-dependent;regulation of transcription, DNA-dependent;chromatin modification;negative regulation of transcription, DNA-dependent	nucleus;cytoplasm;Golgi apparatus;PcG protein complex;PRC1 complex	chromatin binding;single-stranded RNA binding;enzyme binding;methylated histone residue binding;phosphoprotein binding	454764	52470.8
Cbx4	false	true	false	negative regulation of transcription from RNA polymerase II promoter;transcription, DNA-dependent;regulation of transcription, DNA-dependent;chromatin modification;negative regulation of transcription, DNA-dependent	nucleus;cytoplasm;Golgi apparatus;PcG protein complex;PRC1 complex	chromatin binding;single-stranded RNA binding;enzyme binding;methylated histone residue binding;phosphoprotein binding	454764	52470.8
Cbx4	true	false	false	negative regulation of transcription from RNA polymerase II promoter;transcription, DNA-dependent;regulation of transcription, DNA-dependent;chromatin modification;negative regulation of transcription, DNA-dependent	nucleus;cytoplasm;Golgi apparatus;PcG protein complex;PRC1 complex	chromatin binding;single-stranded RNA binding;enzyme binding;methylated histone residue binding;phosphoprotein binding	454764	52470.8
E4f1	true	false	false	negative regulation of transcription from RNA polymerase II promoter;DNA replication;transcription, DNA-dependent;regulation of transcription, DNA-dependent;cell cycle;mitosis;embryo development;regulation of mitotic cell cycle, embryonic;regulation of cell cycle process;regulation of growth;cell division	intracellular;nucleus;cytoplasm;spindle	nucleic acid binding;DNA binding;zinc ion binding;ligase activity;cAMP response element binding;metal ion binding	603563	52333.6
E4f1	true	false	false	negative regulation of transcription from RNA polymerase II promoter;DNA replication;transcription, DNA-dependent;regulation of transcription, DNA-dependent;cell cycle;mitosis;embryo development;regulation of mitotic cell cycle, embryonic;regulation of cell cycle process;regulation of growth;cell division	intracellular;nucleus;cytoplasm;spindle	nucleic acid binding;DNA binding;zinc ion binding;ligase activity;cAMP response element binding;metal ion binding	603563	52333.6
Puf60	false	false	false	transcription, DNA-dependent;regulation of transcription, DNA-dependent;mRNA processing;apoptotic process;RNA splicing	nucleus;ribonucleoprotein complex	nucleotide binding;nucleic acid binding;DNA binding;RNA binding	551326	51214.7
Nfil3	true	false	false	transcription, DNA-dependent;regulation of transcription, DNA-dependent;circadian rhythm;positive regulation of gene expression;rhythmic process	nucleus	RNA polymerase II core promoter sequence-specific DNA binding;DNA binding;sequence-specific DNA binding transcription factor activity;protein binding;sequence-specific DNA binding;protein dimerization activity	700709	50662.2
Nfil3	false	true	false	transcription, DNA-dependent;regulation of transcription, DNA-dependent;circadian rhythm;positive regulation of gene expression;rhythmic process	nucleus	RNA polymerase II core promoter sequence-specific DNA binding;DNA binding;sequence-specific DNA binding transcription factor activity;protein binding;sequence-specific DNA binding;protein dimerization activity	700709	50662.2
Nfil3	true	false	false	transcription, DNA-dependent;regulation of transcription, DNA-dependent;circadian rhythm;positive regulation of gene expression;rhythmic process	nucleus	RNA polymerase II core promoter sequence-specific DNA binding;DNA binding;sequence-specific DNA binding transcription factor activity;protein binding;sequence-specific DNA binding;protein dimerization activity	700709	50662.2
Nfil3	true	false	false	transcription, DNA-dependent;regulation of transcription, DNA-dependent;circadian rhythm;positive regulation of gene expression;rhythmic process	nucleus	RNA polymerase II core promoter sequence-specific DNA binding;DNA binding;sequence-specific DNA binding transcription factor activity;protein binding;sequence-specific DNA binding;protein dimerization activity	700709	50662.2
Nfil3	false	false	false	transcription, DNA-dependent;regulation of transcription, DNA-dependent;circadian rhythm;positive regulation of gene expression;rhythmic process	nucleus	RNA polymerase II core promoter sequence-specific DNA binding;DNA binding;sequence-specific DNA binding transcription factor activity;protein binding;sequence-specific DNA binding;protein dimerization activity	700709	50662.2
Nfil3	false	true	false	transcription, DNA-dependent;regulation of transcription, DNA-dependent;circadian rhythm;positive regulation of gene expression;rhythmic process	nucleus	RNA polymerase II core promoter sequence-specific DNA binding;DNA binding;sequence-specific DNA binding transcription factor activity;protein binding;sequence-specific DNA binding;protein dimerization activity	700709	50662.2
Nfil3	true	false	false	transcription, DNA-dependent;regulation of transcription, DNA-dependent;circadian rhythm;positive regulation of gene expression;rhythmic process	nucleus	RNA polymerase II core promoter sequence-specific DNA binding;DNA binding;sequence-specific DNA binding transcription factor activity;protein binding;sequence-specific DNA binding;protein dimerization activity	700709	50662.2
Nfil3	false	false	true	transcription, DNA-dependent;regulation of transcription, DNA-dependent;circadian rhythm;positive regulation of gene expression;rhythmic process	nucleus	RNA polymerase II core promoter sequence-specific DNA binding;DNA binding;sequence-specific DNA binding transcription factor activity;protein binding;sequence-specific DNA binding;protein dimerization activity	700709	50662.2
Erf	false	true	false	transcription, DNA-dependent;regulation of transcription, DNA-dependent	nucleus	DNA binding;sequence-specific DNA binding transcription factor activity;sequence-specific DNA binding	405810	49495
Sbno2	true	false	false	macrophage activation involved in immune response;transcription, DNA-dependent;regulation of transcription, DNA-dependent;negative regulation of transcription, DNA-dependent;regulation of inflammatory response	cellular_component	DNA binding;ATP binding;hydrolase activity	2.16183e+06	47316.1
Sbno2	false	true	false	macrophage activation involved in immune response;transcription, DNA-dependent;regulation of transcription, DNA-dependent;negative regulation of transcription, DNA-dependent;regulation of inflammatory response	cellular_component	DNA binding;ATP binding;hydrolase activity	2.16183e+06	47316.1
Sbno2	false	true	false	macrophage activation involved in immune response;transcription, DNA-dependent;regulation of transcription, DNA-dependent;negative regulation of transcription, DNA-dependent;regulation of inflammatory response	cellular_component	DNA binding;ATP binding;hydrolase activity	2.16183e+06	47316.1
Sbno2	false	true	false	macrophage activation involved in immune response;transcription, DNA-dependent;regulation of transcription, DNA-dependent;negative regulation of transcription, DNA-dependent;regulation of inflammatory response	cellular_component	DNA binding;ATP binding;hydrolase activity	2.16183e+06	47316.1
Sbno2	false	true	false	macrophage activation involved in immune response;transcription, DNA-dependent;regulation of transcription, DNA-dependent;negative regulation of transcription, DNA-dependent;regulation of inflammatory response	cellular_component	DNA binding;ATP binding;hydrolase activity	2.16183e+06	47316.1
Cbx8	true	false	false	negative regulation of transcription from RNA polymerase II promoter;chromatin silencing;transcription, DNA-dependent;regulation of transcription, DNA-dependent;chromatin modification;histone ubiquitination	ubiquitin ligase complex;nuclear chromatin;heterochromatin;nucleus;PcG protein complex;PRC1 complex	single-stranded RNA binding;ubiquitin-protein ligase activity;protein binding;methylated histone residue binding	117065	47241.6
Cbx8	true	false	false	negative regulation of transcription from RNA polymerase II promoter;chromatin silencing;transcription, DNA-dependent;regulation of transcription, DNA-dependent;chromatin modification;histone ubiquitination	ubiquitin ligase complex;nuclear chromatin;heterochromatin;nucleus;PcG protein complex;PRC1 complex	single-stranded RNA binding;ubiquitin-protein ligase activity;protein binding;methylated histone residue binding	117065	47241.6
Prmt6	false	false	false	DNA repair;transcription, DNA-dependent;regulation of transcription, DNA-dependent;response to DNA damage stimulus;chromatin modification;histone methylation;peptidyl-arginine methylation, to asymmetrical-dimethyl arginine;methylation;histone arginine methylation;histone H3-R2 methylation;peptidyl-arginine N-methylation;histone H4-R3 methylation;negative regulation of transcription, DNA-dependent	nucleus	methyltransferase activity;histone-arginine N-methyltransferase activity;transferase activity;protein-arginine omega-N monomethyltransferase activity;protein-arginine omega-N asymmetric methyltransferase activity;histone methyltransferase activity;histone binding;histone methyltransferase activity (H4-R3 specific);histone methyltransferase activity (H3-R2 specific);histone methyltransferase activ…	220344	45069.2
Zbtb7b	true	false	false	transcription, DNA-dependent;regulation of transcription, DNA-dependent;multicellular organismal development;positive regulation of gene expression;cell differentiation;regulation of CD4-positive, alpha-beta T cell differentiation;regulation of CD8-positive, alpha-beta T cell differentiation;positive regulation of transcription from RNA polymerase II promoter	intracellular;nucleus	nucleic acid binding;DNA binding;sequence-specific DNA binding transcription factor activity;protein binding;zinc ion binding;protein homodimerization activity;metal ion binding	698474	44894.9
Nfe2l2	true	false	false	transcription, DNA-dependent;regulation of transcription, DNA-dependent;positive regulation of blood coagulation;endoplasmic reticulum unfolded protein response;cellular response to oxidative stress;positive regulation of transcription, DNA-dependent;positive regulation of transcription from RNA polymerase II promoter;regulation of embryonic development;regulation of removal of superoxide radical…	chromatin;nucleus;cytoplasm;centrosome;plasma membrane	DNA binding;sequence-specific DNA binding transcription factor activity;protein binding;protein domain specific binding;sequence-specific DNA binding;protein dimerization activity	1.29529e+06	44476.4
Nfe2l2	false	false	true	transcription, DNA-dependent;regulation of transcription, DNA-dependent;positive regulation of blood coagulation;endoplasmic reticulum unfolded protein response;cellular response to oxidative stress;positive regulation of transcription, DNA-dependent;positive regulation of transcription from RNA polymerase II promoter;regulation of embryonic development;regulation of removal of superoxide radical…	chromatin;nucleus;cytoplasm;centrosome;plasma membrane	DNA binding;sequence-specific DNA binding transcription factor activity;protein binding;protein domain specific binding;sequence-specific DNA binding;protein dimerization activity	1.29529e+06	44476.4
Nfe2l2	false	false	true	transcription, DNA-dependent;regulation of transcription, DNA-dependent;positive regulation of blood coagulation;endoplasmic reticulum unfolded protein response;cellular response to oxidative stress;positive regulation of transcription, DNA-dependent;positive regulation of transcription from RNA polymerase II promoter;regulation of embryonic development;regulation of removal of superoxide radical…	chromatin;nucleus;cytoplasm;centrosome;plasma membrane	DNA binding;sequence-specific DNA binding transcription factor activity;protein binding;protein domain specific binding;sequence-specific DNA binding;protein dimerization activity	1.29529e+06	44476.4
Nfe2l2	false	false	true	transcription, DNA-dependent;regulation of transcription, DNA-dependent;positive regulation of blood coagulation;endoplasmic reticulum unfolded protein response;cellular response to oxidative stress;positive regulation of transcription, DNA-dependent;positive regulation of transcription from RNA polymerase II promoter;regulation of embryonic development;regulation of removal of superoxide radical…	chromatin;nucleus;cytoplasm;centrosome;plasma membrane	DNA binding;sequence-specific DNA binding transcription factor activity;protein binding;protein domain specific binding;sequence-specific DNA binding;protein dimerization activity	1.29529e+06	44476.4
Ccdc85b	true	false	false	transcription, DNA-dependent;regulation of transcription, DNA-dependent;cell differentiation;negative regulation of cell growth;regulation of growth;negative regulation of fat cell differentiation;negative regulation of transcription, DNA-dependent	nucleus;cytoplasm;centrosome;cytoskeleton	protein binding	194253	44279.2
Hnrpdl	true	false	false	transcription, DNA-dependent;regulation of transcription, DNA-dependent;mRNA metabolic process	nucleus;cytoplasm	nucleotide binding;nucleic acid binding;DNA binding;RNA binding	247728	43892.3
Nr2f2	false	false	true	negative regulation of transcription from RNA polymerase II promoter;neuron migration;negative regulation of endothelial cell proliferation;transcription, DNA-dependent;regulation of transcription, DNA-dependent;regulation of transcription from RNA polymerase II promoter;skeletal muscle tissue development;anterior/posterior pattern specification;radial pattern formation;negative regulation of end…	nucleus	retinoic acid binding;DNA binding;sequence-specific DNA binding transcription factor activity;steroid hormone receptor activity;receptor activity;ligand-activated sequence-specific DNA binding RNA polymerase II transcription factor activity;zinc ion binding;protein homodimerization activity;sequence-specific DNA binding;metal ion binding	648681	43838.7
Nr2f2	false	false	true	negative regulation of transcription from RNA polymerase II promoter;neuron migration;negative regulation of endothelial cell proliferation;transcription, DNA-dependent;regulation of transcription, DNA-dependent;regulation of transcription from RNA polymerase II promoter;skeletal muscle tissue development;anterior/posterior pattern specification;radial pattern formation;negative regulation of end…	nucleus	retinoic acid binding;DNA binding;sequence-specific DNA binding transcription factor activity;steroid hormone receptor activity;receptor activity;ligand-activated sequence-specific DNA binding RNA polymerase II transcription factor activity;zinc ion binding;protein homodimerization activity;sequence-specific DNA binding;metal ion binding	648681	43838.7
Nr2f2	false	false	true	negative regulation of transcription from RNA polymerase II promoter;neuron migration;negative regulation of endothelial cell proliferation;transcription, DNA-dependent;regulation of transcription, DNA-dependent;regulation of transcription from RNA polymerase II promoter;skeletal muscle tissue development;anterior/posterior pattern specification;radial pattern formation;negative regulation of end…	nucleus	retinoic acid binding;DNA binding;sequence-specific DNA binding transcription factor activity;steroid hormone receptor activity;receptor activity;ligand-activated sequence-specific DNA binding RNA polymerase II transcription factor activity;zinc ion binding;protein homodimerization activity;sequence-specific DNA binding;metal ion binding	648681	43838.7
Nr2f2	true	false	false	negative regulation of transcription from RNA polymerase II promoter;neuron migration;negative regulation of endothelial cell proliferation;transcription, DNA-dependent;regulation of transcription, DNA-dependent;regulation of transcription from RNA polymerase II promoter;skeletal muscle tissue development;anterior/posterior pattern specification;radial pattern formation;negative regulation of end…	nucleus	retinoic acid binding;DNA binding;sequence-specific DNA binding transcription factor activity;steroid hormone receptor activity;receptor activity;ligand-activated sequence-specific DNA binding RNA polymerase II transcription factor activity;zinc ion binding;protein homodimerization activity;sequence-specific DNA binding;metal ion binding	648681	43838.7
Nr2f2	true	false	false	negative regulation of transcription from RNA polymerase II promoter;neuron migration;negative regulation of endothelial cell proliferation;transcription, DNA-dependent;regulation of transcription, DNA-dependent;regulation of transcription from RNA polymerase II promoter;skeletal muscle tissue development;anterior/posterior pattern specification;radial pattern formation;negative regulation of end…	nucleus	retinoic acid binding;DNA binding;sequence-specific DNA binding transcription factor activity;steroid hormone receptor activity;receptor activity;ligand-activated sequence-specific DNA binding RNA polymerase II transcription factor activity;zinc ion binding;protein homodimerization activity;sequence-specific DNA binding;metal ion binding	648681	43838.7
Nr2f2	false	false	true	negative regulation of transcription from RNA polymerase II promoter;neuron migration;negative regulation of endothelial cell proliferation;transcription, DNA-dependent;regulation of transcription, DNA-dependent;regulation of transcription from RNA polymerase II promoter;skeletal muscle tissue development;anterior/posterior pattern specification;radial pattern formation;negative regulation of end…	nucleus	retinoic acid binding;DNA binding;sequence-specific DNA binding transcription factor activity;steroid hormone receptor activity;receptor activity;ligand-activated sequence-specific DNA binding RNA polymerase II transcription factor activity;zinc ion binding;protein homodimerization activity;sequence-specific DNA binding;metal ion binding	648681	43838.7
Nr2f2	false	false	true	negative regulation of transcription from RNA polymerase II promoter;neuron migration;negative regulation of endothelial cell proliferation;transcription, DNA-dependent;regulation of transcription, DNA-dependent;regulation of transcription from RNA polymerase II promoter;skeletal muscle tissue development;anterior/posterior pattern specification;radial pattern formation;negative regulation of end…	nucleus	retinoic acid binding;DNA binding;sequence-specific DNA binding transcription factor activity;steroid hormone receptor activity;receptor activity;ligand-activated sequence-specific DNA binding RNA polymerase II transcription factor activity;zinc ion binding;protein homodimerization activity;sequence-specific DNA binding;metal ion binding	648681	43838.7
Nr2f2	true	false	false	negative regulation of transcription from RNA polymerase II promoter;neuron migration;negative regulation of endothelial cell proliferation;transcription, DNA-dependent;regulation of transcription, DNA-dependent;regulation of transcription from RNA polymerase II promoter;skeletal muscle tissue development;anterior/posterior pattern specification;radial pattern formation;negative regulation of end…	nucleus	retinoic acid binding;DNA binding;sequence-specific DNA binding transcription factor activity;steroid hormone receptor activity;receptor activity;ligand-activated sequence-specific DNA binding RNA polymerase II transcription factor activity;zinc ion binding;protein homodimerization activity;sequence-specific DNA binding;metal ion binding	648681	43838.7
Nr2f2	false	false	true	negative regulation of transcription from RNA polymerase II promoter;neuron migration;negative regulation of endothelial cell proliferation;transcription, DNA-dependent;regulation of transcription, DNA-dependent;regulation of transcription from RNA polymerase II promoter;skeletal muscle tissue development;anterior/posterior pattern specification;radial pattern formation;negative regulation of end…	nucleus	retinoic acid binding;DNA binding;sequence-specific DNA binding transcription factor activity;steroid hormone receptor activity;receptor activity;ligand-activated sequence-specific DNA binding RNA polymerase II transcription factor activity;zinc ion binding;protein homodimerization activity;sequence-specific DNA binding;metal ion binding	648681	43838.7
E2f8	false	false	false	transcription, DNA-dependent;regulation of transcription, DNA-dependent;cell cycle;cell proliferation	nucleus;transcription factor complex	DNA binding;sequence-specific DNA binding transcription factor activity;identical protein binding;protein homodimerization activity	636573	43562.1
Tardbp	false	false	false	transcription, DNA-dependent;regulation of transcription, DNA-dependent;mRNA processing;RNA splicing;negative regulation by host of viral transcription;3'-UTR-mediated mRNA stabilization	nucleus	nucleotide binding;nucleic acid binding;DNA binding;double-stranded DNA binding;RNA binding;mRNA 3'-UTR binding	634672	43426
Sall1	false	false	true	negative regulation of transcription from RNA polymerase II promoter;ureteric bud development;kidney development;neural tube closure;ventricular septum development;heart development;olfactory nerve development;olfactory bulb development;neural tube development;positive regulation of Wnt receptor signaling pathway;inductive cell-cell signaling;forelimb morphogenesis;hindlimb morphogenesis;outer ea…	heterochromatin;nucleus;cytoplasm;chromocenter;NuRD complex	DNA binding;chromatin binding;protein binding;beta-catenin binding	732735	43308.4
Sall1	false	true	false	negative regulation of transcription from RNA polymerase II promoter;ureteric bud development;kidney development;neural tube closure;ventricular septum development;heart development;olfactory nerve development;olfactory bulb development;neural tube development;positive regulation of Wnt receptor signaling pathway;inductive cell-cell signaling;forelimb morphogenesis;hindlimb morphogenesis;outer ea…	heterochromatin;nucleus;cytoplasm;chromocenter;NuRD complex	DNA binding;chromatin binding;protein binding;beta-catenin binding	732735	43308.4
Sall1	false	true	false	negative regulation of transcription from RNA polymerase II promoter;ureteric bud development;kidney development;neural tube closure;ventricular septum development;heart development;olfactory nerve development;olfactory bulb development;neural tube development;positive regulation of Wnt receptor signaling pathway;inductive cell-cell signaling;forelimb morphogenesis;hindlimb morphogenesis;outer ea…	heterochromatin;nucleus;cytoplasm;chromocenter;NuRD complex	DNA binding;chromatin binding;protein binding;beta-catenin binding	732735	43308.4
Sall1	false	false	true	negative regulation of transcription from RNA polymerase II promoter;ureteric bud development;kidney development;neural tube closure;ventricular septum development;heart development;olfactory nerve development;olfactory bulb development;neural tube development;positive regulation of Wnt receptor signaling pathway;inductive cell-cell signaling;forelimb morphogenesis;hindlimb morphogenesis;outer ea…	heterochromatin;nucleus;cytoplasm;chromocenter;NuRD complex	DNA binding;chromatin binding;protein binding;beta-catenin binding	732735	43308.4
Sall1	false	false	true	negative regulation of transcription from RNA polymerase II promoter;ureteric bud development;kidney development;neural tube closure;ventricular septum development;heart development;olfactory nerve development;olfactory bulb development;neural tube development;positive regulation of Wnt receptor signaling pathway;inductive cell-cell signaling;forelimb morphogenesis;hindlimb morphogenesis;outer ea…	heterochromatin;nucleus;cytoplasm;chromocenter;NuRD complex	DNA binding;chromatin binding;protein binding;beta-catenin binding	732735	43308.4
Sall1	false	false	true	negative regulation of transcription from RNA polymerase II promoter;ureteric bud development;kidney development;neural tube closure;ventricular septum development;heart development;olfactory nerve development;olfactory bulb development;neural tube development;positive regulation of Wnt receptor signaling pathway;inductive cell-cell signaling;forelimb morphogenesis;hindlimb morphogenesis;outer ea…	heterochromatin;nucleus;cytoplasm;chromocenter;NuRD complex	DNA binding;chromatin binding;protein binding;beta-catenin binding	732735	43308.4
Zfpm1	false	true	false	negative regulation of transcription from RNA polymerase II promoter;outflow tract morphogenesis;atrioventricular valve morphogenesis;mitral valve formation;tricuspid valve formation;transcription, DNA-dependent;regulation of transcription, DNA-dependent;heart development;regulation of definitive erythrocyte differentiation;erythrocyte differentiation;megakaryocyte differentiation;platelet format…	intracellular;nucleus;transcription factor complex;cytoplasm;transcriptional repressor complex	RNA polymerase II core promoter proximal region sequence-specific DNA binding transcription factor activity involved in negative regulation of transcription;RNA polymerase II transcription factor binding;RNA polymerase II activating transcription factor binding;nucleic acid binding;DNA binding;transcription corepressor activity;protein binding;transcription factor binding;zinc ion binding;metal i…	2.38366e+06	43255.2
Zfpm1	false	true	false	negative regulation of transcription from RNA polymerase II promoter;outflow tract morphogenesis;atrioventricular valve morphogenesis;mitral valve formation;tricuspid valve formation;transcription, DNA-dependent;regulation of transcription, DNA-dependent;heart development;regulation of definitive erythrocyte differentiation;erythrocyte differentiation;megakaryocyte differentiation;platelet format…	intracellular;nucleus;transcription factor complex;cytoplasm;transcriptional repressor complex	RNA polymerase II core promoter proximal region sequence-specific DNA binding transcription factor activity involved in negative regulation of transcription;RNA polymerase II transcription factor binding;RNA polymerase II activating transcription factor binding;nucleic acid binding;DNA binding;transcription corepressor activity;protein binding;transcription factor binding;zinc ion binding;metal i…	2.38366e+06	43255.2
Zfpm1	true	false	false	negative regulation of transcription from RNA polymerase II promoter;outflow tract morphogenesis;atrioventricular valve morphogenesis;mitral valve formation;tricuspid valve formation;transcription, DNA-dependent;regulation of transcription, DNA-dependent;heart development;regulation of definitive erythrocyte differentiation;erythrocyte differentiation;megakaryocyte differentiation;platelet format…	intracellular;nucleus;transcription factor complex;cytoplasm;transcriptional repressor complex	RNA polymerase II core promoter proximal region sequence-specific DNA binding transcription factor activity involved in negative regulation of transcription;RNA polymerase II transcription factor binding;RNA polymerase II activating transcription factor binding;nucleic acid binding;DNA binding;transcription corepressor activity;protein binding;transcription factor binding;zinc ion binding;metal i…	2.38366e+06	43255.2
Zfpm1	true	false	false	negative regulation of transcription from RNA polymerase II promoter;outflow tract morphogenesis;atrioventricular valve morphogenesis;mitral valve formation;tricuspid valve formation;transcription, DNA-dependent;regulation of transcription, DNA-dependent;heart development;regulation of definitive erythrocyte differentiation;erythrocyte differentiation;megakaryocyte differentiation;platelet format…	intracellular;nucleus;transcription factor complex;cytoplasm;transcriptional repressor complex	RNA polymerase II core promoter proximal region sequence-specific DNA binding transcription factor activity involved in negative regulation of transcription;RNA polymerase II transcription factor binding;RNA polymerase II activating transcription factor binding;nucleic acid binding;DNA binding;transcription corepressor activity;protein binding;transcription factor binding;zinc ion binding;metal i…	2.38366e+06	43255.2
Zfpm1	true	false	false	negative regulation of transcription from RNA polymerase II promoter;outflow tract morphogenesis;atrioventricular valve morphogenesis;mitral valve formation;tricuspid valve formation;transcription, DNA-dependent;regulation of transcription, DNA-dependent;heart development;regulation of definitive erythrocyte differentiation;erythrocyte differentiation;megakaryocyte differentiation;platelet format…	intracellular;nucleus;transcription factor complex;cytoplasm;transcriptional repressor complex	RNA polymerase II core promoter proximal region sequence-specific DNA binding transcription factor activity involved in negative regulation of transcription;RNA polymerase II transcription factor binding;RNA polymerase II activating transcription factor binding;nucleic acid binding;DNA binding;transcription corepressor activity;protein binding;transcription factor binding;zinc ion binding;metal i…	2.38366e+06	43255.2
Zfpm1	true	false	false	negative regulation of transcription from RNA polymerase II promoter;outflow tract morphogenesis;atrioventricular valve morphogenesis;mitral valve formation;tricuspid valve formation;transcription, DNA-dependent;regulation of transcription, DNA-dependent;heart development;regulation of definitive erythrocyte differentiation;erythrocyte differentiation;megakaryocyte differentiation;platelet format…	intracellular;nucleus;transcription factor complex;cytoplasm;transcriptional repressor complex	RNA polymerase II core promoter proximal region sequence-specific DNA binding transcription factor activity involved in negative regulation of transcription;RNA polymerase II transcription factor binding;RNA polymerase II activating transcription factor binding;nucleic acid binding;DNA binding;transcription corepressor activity;protein binding;transcription factor binding;zinc ion binding;metal i…	2.38366e+06	43255.2
Zfpm1	true	false	false	negative regulation of transcription from RNA polymerase II promoter;outflow tract morphogenesis;atrioventricular valve morphogenesis;mitral valve formation;tricuspid valve formation;transcription, DNA-dependent;regulation of transcription, DNA-dependent;heart development;regulation of definitive erythrocyte differentiation;erythrocyte differentiation;megakaryocyte differentiation;platelet format…	intracellular;nucleus;transcription factor complex;cytoplasm;transcriptional repressor complex	RNA polymerase II core promoter proximal region sequence-specific DNA binding transcription factor activity involved in negative regulation of transcription;RNA polymerase II transcription factor binding;RNA polymerase II activating transcription factor binding;nucleic acid binding;DNA binding;transcription corepressor activity;protein binding;transcription factor binding;zinc ion binding;metal i…	2.38366e+06	43255.2
Zfpm1	true	false	false	negative regulation of transcription from RNA polymerase II promoter;outflow tract morphogenesis;atrioventricular valve morphogenesis;mitral valve formation;tricuspid valve formation;transcription, DNA-dependent;regulation of transcription, DNA-dependent;heart development;regulation of definitive erythrocyte differentiation;erythrocyte differentiation;megakaryocyte differentiation;platelet format…	intracellular;nucleus;transcription factor complex;cytoplasm;transcriptional repressor complex	RNA polymerase II core promoter proximal region sequence-specific DNA binding transcription factor activity involved in negative regulation of transcription;RNA polymerase II transcription factor binding;RNA polymerase II activating transcription factor binding;nucleic acid binding;DNA binding;transcription corepressor activity;protein binding;transcription factor binding;zinc ion binding;metal i…	2.38366e+06	43255.2
Mnt	true	false	false	transcription, DNA-dependent;regulation of transcription, DNA-dependent;cell aging;regulation of apoptotic process;regulation of cell cycle	nucleus	DNA binding;chromatin binding;sequence-specific DNA binding transcription factor activity;protein binding	633654	42808.7
Mnt	true	false	false	transcription, DNA-dependent;regulation of transcription, DNA-dependent;cell aging;regulation of apoptotic process;regulation of cell cycle	nucleus	DNA binding;chromatin binding;sequence-specific DNA binding transcription factor activity;protein binding	633654	42808.7
Mnt	true	false	false	transcription, DNA-dependent;regulation of transcription, DNA-dependent;cell aging;regulation of apoptotic process;regulation of cell cycle	nucleus	DNA binding;chromatin binding;sequence-specific DNA binding transcription factor activity;protein binding	633654	42808.7
Mnt	true	false	false	transcription, DNA-dependent;regulation of transcription, DNA-dependent;cell aging;regulation of apoptotic process;regulation of cell cycle	nucleus	DNA binding;chromatin binding;sequence-specific DNA binding transcription factor activity;protein binding	633654	42808.7
Ccdc101	false	false	true	transcription, DNA-dependent;regulation of transcription, DNA-dependent;chromatin modification;histone H3 acetylation	nucleus;Ada2/Gcn5/Ada3 transcription activator complex;SAGA-type complex	methylated histone residue binding	1.00295e+06	42731.3
Hnf1a	true	false	false	negative regulation of transcription from RNA polymerase II promoter;blastocyst development;liver development;placenta development;chromatin remodeling;transcription, DNA-dependent;regulation of transcription, DNA-dependent;regulation of transcription from RNA polymerase II promoter;transcription from RNA polymerase II promoter;fatty acid biosynthetic process;bile acid biosynthetic process;heme b…	photoreceptor outer segment;cell;nucleus;transcription factor complex;cytoplasm;protein complex;pronucleus	RNA polymerase II core promoter proximal region sequence-specific DNA binding transcription factor activity involved in positive regulation of transcription;DNA binding;double-stranded DNA binding;sequence-specific DNA binding transcription factor activity;protein binding;transcription factor binding;protein homodimerization activity;sequence-specific DNA binding;transcription regulatory region D…	930543	42138.4
Nfic	true	false	false	negative regulation of transcription from RNA polymerase II promoter;DNA replication;transcription, DNA-dependent;regulation of transcription, DNA-dependent;odontogenesis of dentin-containing tooth;negative regulation of transcription, DNA-dependent;positive regulation of transcription from RNA polymerase II promoter	intracellular;nucleus	core promoter proximal region DNA binding;DNA binding;double-stranded DNA binding;sequence-specific DNA binding transcription factor activity	1.30228e+06	42032.2
Zbtb7a	true	false	false	negative regulation of transcription from RNA polymerase II promoter;transcription, DNA-dependent;regulation of transcription, DNA-dependent;multicellular organismal development;cell differentiation;regulation of osteoclast differentiation;negative regulation of transcription, DNA-dependent;cartilage development	intracellular;nucleus	nucleic acid binding;DNA binding;sequence-specific DNA binding transcription factor activity;protein binding;zinc ion binding;histone acetyltransferase binding;metal ion binding	639590	41566.9
Zbtb7a	true	false	false	negative regulation of transcription from RNA polymerase II promoter;transcription, DNA-dependent;regulation of transcription, DNA-dependent;multicellular organismal development;cell differentiation;regulation of osteoclast differentiation;negative regulation of transcription, DNA-dependent;cartilage development	intracellular;nucleus	nucleic acid binding;DNA binding;sequence-specific DNA binding transcription factor activity;protein binding;zinc ion binding;histone acetyltransferase binding;metal ion binding	639590	41566.9
Zbtb7a	true	false	false	negative regulation of transcription from RNA polymerase II promoter;transcription, DNA-dependent;regulation of transcription, DNA-dependent;multicellular organismal development;cell differentiation;regulation of osteoclast differentiation;negative regulation of transcription, DNA-dependent;cartilage development	intracellular;nucleus	nucleic acid binding;DNA binding;sequence-specific DNA binding transcription factor activity;protein binding;zinc ion binding;histone acetyltransferase binding;metal ion binding	639590	41566.9
Esrra	true	false	false	transcription, DNA-dependent;regulation of transcription, DNA-dependent;regulation of ossification;regulation of cell proliferation;steroid hormone mediated signaling pathway;regulation of osteoblast differentiation;regulation of osteoclast differentiation;positive regulation of transcription, DNA-dependent;positive regulation of transcription from RNA polymerase II promoter;cartilage development	nucleus	DNA binding;sequence-specific DNA binding transcription factor activity;steroid hormone receptor activity;receptor activity;steroid binding;zinc ion binding;protein domain specific binding;sequence-specific DNA binding;metal ion binding	448046	41363.2
Esrra	false	true	false	transcription, DNA-dependent;regulation of transcription, DNA-dependent;regulation of ossification;regulation of cell proliferation;steroid hormone mediated signaling pathway;regulation of osteoblast differentiation;regulation of osteoclast differentiation;positive regulation of transcription, DNA-dependent;positive regulation of transcription from RNA polymerase II promoter;cartilage development	nucleus	DNA binding;sequence-specific DNA binding transcription factor activity;steroid hormone receptor activity;receptor activity;steroid binding;zinc ion binding;protein domain specific binding;sequence-specific DNA binding;metal ion binding	448046	41363.2
Atf3	true	false	false	gluconeogenesis;transcription, DNA-dependent;regulation of transcription, DNA-dependent;positive regulation of cell proliferation;negative regulation of transcription, DNA-dependent	nucleus;nucleolus	DNA binding;sequence-specific DNA binding transcription factor activity;identical protein binding;sequence-specific DNA binding;protein dimerization activity	537093	41197.6
Atf3	false	false	false	gluconeogenesis;transcription, DNA-dependent;regulation of transcription, DNA-dependent;positive regulation of cell proliferation;negative regulation of transcription, DNA-dependent	nucleus;nucleolus	DNA binding;sequence-specific DNA binding transcription factor activity;identical protein binding;sequence-specific DNA binding;protein dimerization activity	537093	41197.6
Ddit3	true	false	false	transcription, DNA-dependent;regulation of transcription, DNA-dependent;ER overload response;cell cycle;cell cycle arrest;endoplasmic reticulum unfolded protein response;negative regulation of CREB transcription factor activity;response to endoplasmic reticulum stress;mRNA transcription from RNA polymerase II promoter;regulation of apoptotic process;positive regulation of apoptotic process;negati…	nucleus;cytoplasm	DNA binding;sequence-specific DNA binding transcription factor activity;protein binding;transcription factor binding;sequence-specific DNA binding	226252	41166.7
Ppara	false	true	false	negative regulation of transcription from RNA polymerase II promoter;response to hypoxia;glucose metabolic process;transcription, DNA-dependent;regulation of transcription, DNA-dependent;lipid metabolic process;fatty acid metabolic process;epidermis development;regulation of gene expression;negative regulation of macrophage derived foam cell differentiation;negative regulation of receptor biosynt…	nucleus	DNA binding;sequence-specific DNA binding transcription factor activity;steroid hormone receptor activity;receptor activity;ligand-activated sequence-specific DNA binding RNA polymerase II transcription factor activity;protein binding;drug binding;zinc ion binding;lipid binding;phosphatase binding;protein domain specific binding;ubiquitin conjugating enzyme binding;sequence-specific DNA binding;m…	2.90586e+06	40762.2
Ppara	false	false	true	negative regulation of transcription from RNA polymerase II promoter;response to hypoxia;glucose metabolic process;transcription, DNA-dependent;regulation of transcription, DNA-dependent;lipid metabolic process;fatty acid metabolic process;epidermis development;regulation of gene expression;negative regulation of macrophage derived foam cell differentiation;negative regulation of receptor biosynt…	nucleus	DNA binding;sequence-specific DNA binding transcription factor activity;steroid hormone receptor activity;receptor activity;ligand-activated sequence-specific DNA binding RNA polymerase II transcription factor activity;protein binding;drug binding;zinc ion binding;lipid binding;phosphatase binding;protein domain specific binding;ubiquitin conjugating enzyme binding;sequence-specific DNA binding;m…	2.90586e+06	40762.2
Ppara	false	true	false	negative regulation of transcription from RNA polymerase II promoter;response to hypoxia;glucose metabolic process;transcription, DNA-dependent;regulation of transcription, DNA-dependent;lipid metabolic process;fatty acid metabolic process;epidermis development;regulation of gene expression;negative regulation of macrophage derived foam cell differentiation;negative regulation of receptor biosynt…	nucleus	DNA binding;sequence-specific DNA binding transcription factor activity;steroid hormone receptor activity;receptor activity;ligand-activated sequence-specific DNA binding RNA polymerase II transcription factor activity;protein binding;drug binding;zinc ion binding;lipid binding;phosphatase binding;protein domain specific binding;ubiquitin conjugating enzyme binding;sequence-specific DNA binding;m…	2.90586e+06	40762.2
Ppara	false	false	false	negative regulation of transcription from RNA polymerase II promoter;response to hypoxia;glucose metabolic process;transcription, DNA-dependent;regulation of transcription, DNA-dependent;lipid metabolic process;fatty acid metabolic process;epidermis development;regulation of gene expression;negative regulation of macrophage derived foam cell differentiation;negative regulation of receptor biosynt…	nucleus	DNA binding;sequence-specific DNA binding transcription factor activity;steroid hormone receptor activity;receptor activity;ligand-activated sequence-specific DNA binding RNA polymerase II transcription factor activity;protein binding;drug binding;zinc ion binding;lipid binding;phosphatase binding;protein domain specific binding;ubiquitin conjugating enzyme binding;sequence-specific DNA binding;m…	2.90586e+06	40762.2
Atoh8	false	true	false	transcription, DNA-dependent;regulation of transcription, DNA-dependent;multicellular organismal development;nervous system development;cell differentiation	nucleus	DNA binding	1.17215e+06	39869.1
Atoh8	true	false	false	transcription, DNA-dependent;regulation of transcription, DNA-dependent;multicellular organismal development;nervous system development;cell differentiation	nucleus	DNA binding	1.17215e+06	39869.1
Klf2	true	false	false	cell morphogenesis;in utero embryonic development;transcription, DNA-dependent;regulation of transcription, DNA-dependent;negative regulation of interleukin-6 production;erythrocyte homeostasis;multicellular organism growth;erythrocyte maturation;positive regulation of transcription, DNA-dependent;positive regulation of transcription from RNA polymerase II promoter;positive regulation of protein …	intracellular;nucleus	nucleic acid binding;DNA binding;sequence-specific DNA binding transcription factor activity;protein binding;zinc ion binding;sequence-specific DNA binding;metal ion binding	103162	39784.7
Ccnl1	false	false	false	regulation of cyclin-dependent protein kinase activity;transcription, DNA-dependent;regulation of transcription, DNA-dependent;RNA processing;biological_process	nucleus;cytoplasm;transcription elongation factor complex;nuclear speck	protein binding;protein kinase binding	479476	39708.2
Ccnl1	false	false	true	regulation of cyclin-dependent protein kinase activity;transcription, DNA-dependent;regulation of transcription, DNA-dependent;RNA processing;biological_process	nucleus;cytoplasm;transcription elongation factor complex;nuclear speck	protein binding;protein kinase binding	479476	39708.2
Ccnl1	false	false	false	regulation of cyclin-dependent protein kinase activity;transcription, DNA-dependent;regulation of transcription, DNA-dependent;RNA processing;biological_process	nucleus;cytoplasm;transcription elongation factor complex;nuclear speck	protein binding;protein kinase binding	479476	39708.2
Ccnl1	false	true	false	regulation of cyclin-dependent protein kinase activity;transcription, DNA-dependent;regulation of transcription, DNA-dependent;RNA processing;biological_process	nucleus;cytoplasm;transcription elongation factor complex;nuclear speck	protein binding;protein kinase binding	479476	39708.2
Ccnl1	false	false	true	regulation of cyclin-dependent protein kinase activity;transcription, DNA-dependent;regulation of transcription, DNA-dependent;RNA processing;biological_process	nucleus;cytoplasm;transcription elongation factor complex;nuclear speck	protein binding;protein kinase binding	479476	39708.2
Ccnl1	false	false	true	regulation of cyclin-dependent protein kinase activity;transcription, DNA-dependent;regulation of transcription, DNA-dependent;RNA processing;biological_process	nucleus;cytoplasm;transcription elongation factor complex;nuclear speck	protein binding;protein kinase binding	479476	39708.2
Ccnl1	false	true	false	regulation of cyclin-dependent protein kinase activity;transcription, DNA-dependent;regulation of transcription, DNA-dependent;RNA processing;biological_process	nucleus;cytoplasm;transcription elongation factor complex;nuclear speck	protein binding;protein kinase binding	479476	39708.2
Zfp628	true	false	false	transcription, DNA-dependent;regulation of transcription, DNA-dependent	intracellular;nucleus	nucleic acid binding;DNA binding;sequence-specific DNA binding transcription factor activity;zinc ion binding;metal ion binding	267285	39381.9
Nfyb	false	false	true	transcription, DNA-dependent;regulation of transcription, DNA-dependent;positive regulation of transcription, DNA-dependent	intracellular;nucleus;transcription factor complex;CCAAT-binding factor complex	DNA binding;sequence-specific DNA binding transcription factor activity;sequence-specific DNA binding;repressing transcription factor binding	605827	39232.4
Prox1	true	false	false	negative regulation of transcription from RNA polymerase II promoter;cell fate determination;positive regulation of endothelial cell proliferation;lymph vessel development;lymphangiogenesis;lens morphogenesis in camera-type eye;hepatocyte cell migration;transcription, DNA-dependent;regulation of transcription, DNA-dependent;multicellular organismal development;positive regulation of cell prolifer…	nucleus;cytoplasm	sequence-specific DNA binding RNA polymerase II transcription factor activity;DNA binding;sequence-specific DNA binding transcription factor activity;sequence-specific distal enhancer binding RNA polymerase II transcription factor activity;transcription corepressor activity;ligand-dependent nuclear receptor binding;sequence-specific DNA binding;transcription regulatory region DNA binding;DBD doma…	1.89741e+06	38800.3
Prox1	false	true	false	negative regulation of transcription from RNA polymerase II promoter;cell fate determination;positive regulation of endothelial cell proliferation;lymph vessel development;lymphangiogenesis;lens morphogenesis in camera-type eye;hepatocyte cell migration;transcription, DNA-dependent;regulation of transcription, DNA-dependent;multicellular organismal development;positive regulation of cell prolifer…	nucleus;cytoplasm	sequence-specific DNA binding RNA polymerase II transcription factor activity;DNA binding;sequence-specific DNA binding transcription factor activity;sequence-specific distal enhancer binding RNA polymerase II transcription factor activity;transcription corepressor activity;ligand-dependent nuclear receptor binding;sequence-specific DNA binding;transcription regulatory region DNA binding;DBD doma…	1.89741e+06	38800.3
Prox1	false	false	true	negative regulation of transcription from RNA polymerase II promoter;cell fate determination;positive regulation of endothelial cell proliferation;lymph vessel development;lymphangiogenesis;lens morphogenesis in camera-type eye;hepatocyte cell migration;transcription, DNA-dependent;regulation of transcription, DNA-dependent;multicellular organismal development;positive regulation of cell prolifer…	nucleus;cytoplasm	sequence-specific DNA binding RNA polymerase II transcription factor activity;DNA binding;sequence-specific DNA binding transcription factor activity;sequence-specific distal enhancer binding RNA polymerase II transcription factor activity;transcription corepressor activity;ligand-dependent nuclear receptor binding;sequence-specific DNA binding;transcription regulatory region DNA binding;DBD doma…	1.89741e+06	38800.3
Prox1	false	false	true	negative regulation of transcription from RNA polymerase II promoter;cell fate determination;positive regulation of endothelial cell proliferation;lymph vessel development;lymphangiogenesis;lens morphogenesis in camera-type eye;hepatocyte cell migration;transcription, DNA-dependent;regulation of transcription, DNA-dependent;multicellular organismal development;positive regulation of cell prolifer…	nucleus;cytoplasm	sequence-specific DNA binding RNA polymerase II transcription factor activity;DNA binding;sequence-specific DNA binding transcription factor activity;sequence-specific distal enhancer binding RNA polymerase II transcription factor activity;transcription corepressor activity;ligand-dependent nuclear receptor binding;sequence-specific DNA binding;transcription regulatory region DNA binding;DBD doma…	1.89741e+06	38800.3
Prox1	false	false	true	negative regulation of transcription from RNA polymerase II promoter;cell fate determination;positive regulation of endothelial cell proliferation;lymph vessel development;lymphangiogenesis;lens morphogenesis in camera-type eye;hepatocyte cell migration;transcription, DNA-dependent;regulation of transcription, DNA-dependent;multicellular organismal development;positive regulation of cell prolifer…	nucleus;cytoplasm	sequence-specific DNA binding RNA polymerase II transcription factor activity;DNA binding;sequence-specific DNA binding transcription factor activity;sequence-specific distal enhancer binding RNA polymerase II transcription factor activity;transcription corepressor activity;ligand-dependent nuclear receptor binding;sequence-specific DNA binding;transcription regulatory region DNA binding;DBD doma…	1.89741e+06	38800.3
Prox1	false	false	false	negative regulation of transcription from RNA polymerase II promoter;cell fate determination;positive regulation of endothelial cell proliferation;lymph vessel development;lymphangiogenesis;lens morphogenesis in camera-type eye;hepatocyte cell migration;transcription, DNA-dependent;regulation of transcription, DNA-dependent;multicellular organismal development;positive regulation of cell prolifer…	nucleus;cytoplasm	sequence-specific DNA binding RNA polymerase II transcription factor activity;DNA binding;sequence-specific DNA binding transcription factor activity;sequence-specific distal enhancer binding RNA polymerase II transcription factor activity;transcription corepressor activity;ligand-dependent nuclear receptor binding;sequence-specific DNA binding;transcription regulatory region DNA binding;DBD doma…	1.89741e+06	38800.3
Prox1	false	false	true	negative regulation of transcription from RNA polymerase II promoter;cell fate determination;positive regulation of endothelial cell proliferation;lymph vessel development;lymphangiogenesis;lens morphogenesis in camera-type eye;hepatocyte cell migration;transcription, DNA-dependent;regulation of transcription, DNA-dependent;multicellular organismal development;positive regulation of cell prolifer…	nucleus;cytoplasm	sequence-specific DNA binding RNA polymerase II transcription factor activity;DNA binding;sequence-specific DNA binding transcription factor activity;sequence-specific distal enhancer binding RNA polymerase II transcription factor activity;transcription corepressor activity;ligand-dependent nuclear receptor binding;sequence-specific DNA binding;transcription regulatory region DNA binding;DBD doma…	1.89741e+06	38800.3
Prox1	false	false	false	negative regulation of transcription from RNA polymerase II promoter;cell fate determination;positive regulation of endothelial cell proliferation;lymph vessel development;lymphangiogenesis;lens morphogenesis in camera-type eye;hepatocyte cell migration;transcription, DNA-dependent;regulation of transcription, DNA-dependent;multicellular organismal development;positive regulation of cell prolifer…	nucleus;cytoplasm	sequence-specific DNA binding RNA polymerase II transcription factor activity;DNA binding;sequence-specific DNA binding transcription factor activity;sequence-specific distal enhancer binding RNA polymerase II transcription factor activity;transcription corepressor activity;ligand-dependent nuclear receptor binding;sequence-specific DNA binding;transcription regulatory region DNA binding;DBD doma…	1.89741e+06	38800.3
Nfkbiz	true	false	false	transcription, DNA-dependent;regulation of transcription, DNA-dependent;inflammatory response	nucleus		1.03985e+06	38138.6
Nfkbiz	false	true	false	transcription, DNA-dependent;regulation of transcription, DNA-dependent;inflammatory response	nucleus		1.03985e+06	38138.6
Klf9	false	false	true	regulation of transcription, DNA-dependent;embryo implantation;progesterone receptor signaling pathway;cellular response to thyroid hormone stimulus	nucleus	DNA binding	965582	37591.8
Klf9	false	false	true	regulation of transcription, DNA-dependent;embryo implantation;progesterone receptor signaling pathway;cellular response to thyroid hormone stimulus	nucleus	DNA binding	965582	37591.8
Klf9	false	true	false	regulation of transcription, DNA-dependent;embryo implantation;progesterone receptor signaling pathway;cellular response to thyroid hormone stimulus	nucleus	DNA binding	965582	37591.8
Klf9	false	true	false	regulation of transcription, DNA-dependent;embryo implantation;progesterone receptor signaling pathway;cellular response to thyroid hormone stimulus	nucleus	DNA binding	965582	37591.8
Klf9	false	true	false	regulation of transcription, DNA-dependent;embryo implantation;progesterone receptor signaling pathway;cellular response to thyroid hormone stimulus	nucleus	DNA binding	965582	37591.8
Klf9	true	false	false	regulation of transcription, DNA-dependent;embryo implantation;progesterone receptor signaling pathway;cellular response to thyroid hormone stimulus	nucleus	DNA binding	965582	37591.8
Hmg20b	true	false	false	chromatin organization;chromatin remodeling;transcription, DNA-dependent;regulation of transcription, DNA-dependent;cell cycle;chromatin modification	condensed nuclear chromosome;BRCA2-BRAF35 complex;nucleus;chromosome	four-way junction DNA binding;DNA binding;sequence-specific DNA binding transcription factor activity;protein binding	164109	37196.2
Myc	false	true	false	negative regulation of transcription from RNA polymerase II promoter;MAPKKK cascade;branching involved in ureteric bud morphogenesis;B cell apoptosis;release of cytochrome c from mitochondria;positive regulation of mesenchymal cell proliferation;positive regulation of B cell apoptosis;glucose metabolic process;DNA fragmentation involved in apoptotic nuclear change;chromatin remodeling;transcripti…	nucleus;nucleoplasm;nucleolus;cytoplasm;spindle;nuclear body;axon;protein complex	DNA binding;double-stranded DNA binding;sequence-specific DNA binding transcription factor activity;protein binding;transcription factor binding;protein complex binding;sequence-specific DNA binding;protein heterodimerization activity;repressing transcription factor binding;E-box binding	184201	36686.1
Myc	false	false	true	negative regulation of transcription from RNA polymerase II promoter;MAPKKK cascade;branching involved in ureteric bud morphogenesis;B cell apoptosis;release of cytochrome c from mitochondria;positive regulation of mesenchymal cell proliferation;positive regulation of B cell apoptosis;glucose metabolic process;DNA fragmentation involved in apoptotic nuclear change;chromatin remodeling;transcripti…	nucleus;nucleoplasm;nucleolus;cytoplasm;spindle;nuclear body;axon;protein complex	DNA binding;double-stranded DNA binding;sequence-specific DNA binding transcription factor activity;protein binding;transcription factor binding;protein complex binding;sequence-specific DNA binding;protein heterodimerization activity;repressing transcription factor binding;E-box binding	184201	36686.1
Zfp703	false	false	false	transcription, DNA-dependent;regulation of transcription, DNA-dependent;positive regulation of cell proliferation;positive regulation of epithelial to mesenchymal transition;regulation of transforming growth factor beta receptor signaling pathway;positive regulation of cell migration;positive regulation of mammary gland epithelial cell proliferation;negative regulation of homotypic cell-cell adhe…	intracellular;nucleus;cytoplasm	nucleic acid binding;zinc ion binding;metal ion binding;repressing transcription factor binding	149463	36215.8
Nr1h3	true	false	false	negative regulation of transcription from RNA polymerase II promoter;transcription, DNA-dependent;regulation of transcription, DNA-dependent;fatty acid biosynthetic process;positive regulation of triglyceride biosynthetic process;positive regulation of receptor biosynthetic process;positive regulation of cholesterol efflux;negative regulation of cholesterol storage;positive regulation of cellular…	nuclear chromatin;nucleus;cytoplasm	DNA binding;sequence-specific DNA binding transcription factor activity;steroid hormone receptor activity;receptor activity;ligand-activated sequence-specific DNA binding RNA polymerase II transcription factor activity;protein binding;zinc ion binding;sterol response element binding;sequence-specific DNA binding;transcription regulatory region DNA binding;metal ion binding;retinoid X receptor bin…	388749	35161.9
Irf1	true	false	false	transcription, DNA-dependent;regulation of transcription, DNA-dependent;I-kappaB kinase/NF-kappaB cascade;regulation of gene expression;positive regulation of cell death;negative regulation of tyrosine phosphorylation of Stat1 protein;CD8-positive, alpha-beta T cell differentiation;positive regulation of interleukin-12 biosynthetic process;positive regulation of transcription, DNA-dependent;posit…	nucleus	regulatory region DNA binding;DNA binding;sequence-specific DNA binding transcription factor activity;protein binding;sequence-specific DNA binding	290973	34801.2
Per2	true	false	false	negative regulation of transcription from RNA polymerase II promoter;transcription, DNA-dependent;regulation of transcription, DNA-dependent;signal transduction;circadian rhythm;rhythmic process	nucleus;cytoplasm	protein binding transcription factor activity;signal transducer activity;protein binding	1.50348e+06	34684.7
Per2	false	true	false	negative regulation of transcription from RNA polymerase II promoter;transcription, DNA-dependent;regulation of transcription, DNA-dependent;signal transduction;circadian rhythm;rhythmic process	nucleus;cytoplasm	protein binding transcription factor activity;signal transducer activity;protein binding	1.50348e+06	34684.7
Per2	true	false	false	negative regulation of transcription from RNA polymerase II promoter;transcription, DNA-dependent;regulation of transcription, DNA-dependent;signal transduction;circadian rhythm;rhythmic process	nucleus;cytoplasm	protein binding transcription factor activity;signal transducer activity;protein binding	1.50348e+06	34684.7
Per2	true	false	false	negative regulation of transcription from RNA polymerase II promoter;transcription, DNA-dependent;regulation of transcription, DNA-dependent;signal transduction;circadian rhythm;rhythmic process	nucleus;cytoplasm	protein binding transcription factor activity;signal transducer activity;protein binding	1.50348e+06	34684.7
Per2	false	false	false	negative regulation of transcription from RNA polymerase II promoter;transcription, DNA-dependent;regulation of transcription, DNA-dependent;signal transduction;circadian rhythm;rhythmic process	nucleus;cytoplasm	protein binding transcription factor activity;signal transducer activity;protein binding	1.50348e+06	34684.7
Per2	false	true	false	negative regulation of transcription from RNA polymerase II promoter;transcription, DNA-dependent;regulation of transcription, DNA-dependent;signal transduction;circadian rhythm;rhythmic process	nucleus;cytoplasm	protein binding transcription factor activity;signal transducer activity;protein binding	1.50348e+06	34684.7
Per2	true	false	false	negative regulation of transcription from RNA polymerase II promoter;transcription, DNA-dependent;regulation of transcription, DNA-dependent;signal transduction;circadian rhythm;rhythmic process	nucleus;cytoplasm	protein binding transcription factor activity;signal transducer activity;protein binding	1.50348e+06	34684.7
Per2	true	false	false	negative regulation of transcription from RNA polymerase II promoter;transcription, DNA-dependent;regulation of transcription, DNA-dependent;signal transduction;circadian rhythm;rhythmic process	nucleus;cytoplasm	protein binding transcription factor activity;signal transducer activity;protein binding	1.50348e+06	34684.7
Per2	true	false	false	negative regulation of transcription from RNA polymerase II promoter;transcription, DNA-dependent;regulation of transcription, DNA-dependent;signal transduction;circadian rhythm;rhythmic process	nucleus;cytoplasm	protein binding transcription factor activity;signal transducer activity;protein binding	1.50348e+06	34684.7
Safb2	false	false	true	transcription, DNA-dependent;regulation of transcription, DNA-dependent;biological_process	cellular_component;nucleus;cytoplasm	nucleotide binding;molecular_function;nucleic acid binding;DNA binding;RNA binding	740206	34202.3
Safb2	false	true	false	transcription, DNA-dependent;regulation of transcription, DNA-dependent;biological_process	cellular_component;nucleus;cytoplasm	nucleotide binding;molecular_function;nucleic acid binding;DNA binding;RNA binding	740206	34202.3
Mlxipl	false	false	true	negative regulation of transcription from RNA polymerase II promoter;transcription, DNA-dependent;regulation of transcription, DNA-dependent;positive regulation of cell proliferation;glucose mediated signaling pathway;negative regulation of peptidyl-serine phosphorylation;glucose homeostasis;positive regulation of fatty acid biosynthetic process;positive regulation of glycolysis;negative regulati…	nucleus;transcription factor complex;cytoplasm	DNA binding;protein binding;transcription factor binding;carbohydrate response element binding;protein heterodimerization activity	1.05007e+06	33862.3
Mlxipl	true	false	false	negative regulation of transcription from RNA polymerase II promoter;transcription, DNA-dependent;regulation of transcription, DNA-dependent;positive regulation of cell proliferation;glucose mediated signaling pathway;negative regulation of peptidyl-serine phosphorylation;glucose homeostasis;positive regulation of fatty acid biosynthetic process;positive regulation of glycolysis;negative regulati…	nucleus;transcription factor complex;cytoplasm	DNA binding;protein binding;transcription factor binding;carbohydrate response element binding;protein heterodimerization activity	1.05007e+06	33862.3
Mlxipl	false	true	false	negative regulation of transcription from RNA polymerase II promoter;transcription, DNA-dependent;regulation of transcription, DNA-dependent;positive regulation of cell proliferation;glucose mediated signaling pathway;negative regulation of peptidyl-serine phosphorylation;glucose homeostasis;positive regulation of fatty acid biosynthetic process;positive regulation of glycolysis;negative regulati…	nucleus;transcription factor complex;cytoplasm	DNA binding;protein binding;transcription factor binding;carbohydrate response element binding;protein heterodimerization activity	1.05007e+06	33862.3
Pcbd1	true	false	false	transcription, DNA-dependent;regulation of transcription, DNA-dependent;tetrahydrobiopterin biosynthetic process;regulation of protein homodimerization activity;positive regulation of transcription, DNA-dependent;protein homotetramerization;protein heterooligomerization	nucleus;cytoplasm	transcription coactivator activity;phenylalanine 4-monooxygenase activity;protein binding;4-alpha-hydroxytetrahydrobiopterin dehydratase activity;lyase activity;identical protein binding	168390	33765.9
Ell	true	false	false	in utero embryonic development;transcription, DNA-dependent;regulation of transcription, DNA-dependent;transcription elongation from RNA polymerase II promoter;negative regulation of phosphatase activity	nucleus;transcription elongation factor complex;nuclear speck	phosphatase binding	1.78501e+06	33563
Ell	false	true	false	in utero embryonic development;transcription, DNA-dependent;regulation of transcription, DNA-dependent;transcription elongation from RNA polymerase II promoter;negative regulation of phosphatase activity	nucleus;transcription elongation factor complex;nuclear speck	phosphatase binding	1.78501e+06	33563
Ell	false	false	true	in utero embryonic development;transcription, DNA-dependent;regulation of transcription, DNA-dependent;transcription elongation from RNA polymerase II promoter;negative regulation of phosphatase activity	nucleus;transcription elongation factor complex;nuclear speck	phosphatase binding	1.78501e+06	33563
Ell	true	false	false	in utero embryonic development;transcription, DNA-dependent;regulation of transcription, DNA-dependent;transcription elongation from RNA polymerase II promoter;negative regulation of phosphatase activity	nucleus;transcription elongation factor complex;nuclear speck	phosphatase binding	1.78501e+06	33563
Ell	false	true	false	in utero embryonic development;transcription, DNA-dependent;regulation of transcription, DNA-dependent;transcription elongation from RNA polymerase II promoter;negative regulation of phosphatase activity	nucleus;transcription elongation factor complex;nuclear speck	phosphatase binding	1.78501e+06	33563
Rela	true	false	false	liver development;hair follicle development;transcription, DNA-dependent;regulation of transcription, DNA-dependent;regulation of transcription from RNA polymerase II promoter;anti-apoptosis;defense response;inflammatory response;positive regulation of cell proliferation;response to bacterium;organ morphogenesis;response to organic substance;response to UV-B;positive regulation of Schwann cell di…	nucleus;transcription factor complex;cytoplasm;cytosol;protein complex	DNA binding;chromatin binding;sequence-specific DNA binding transcription factor activity;sequence-specific distal enhancer binding RNA polymerase II transcription factor activity;protein binding;transcription factor binding;protein kinase binding;ubiquitin protein ligase binding;protein complex binding;activating transcription factor binding;phosphate ion binding;identical protein binding;sequen…	356641	33515.7
Rela	true	false	false	liver development;hair follicle development;transcription, DNA-dependent;regulation of transcription, DNA-dependent;regulation of transcription from RNA polymerase II promoter;anti-apoptosis;defense response;inflammatory response;positive regulation of cell proliferation;response to bacterium;organ morphogenesis;response to organic substance;response to UV-B;positive regulation of Schwann cell di…	nucleus;transcription factor complex;cytoplasm;cytosol;protein complex	DNA binding;chromatin binding;sequence-specific DNA binding transcription factor activity;sequence-specific distal enhancer binding RNA polymerase II transcription factor activity;protein binding;transcription factor binding;protein kinase binding;ubiquitin protein ligase binding;protein complex binding;activating transcription factor binding;phosphate ion binding;identical protein binding;sequen…	356641	33515.7
Zfp467	false	true	false	transcription, DNA-dependent;regulation of transcription, DNA-dependent	intracellular;nucleus	nucleic acid binding;DNA binding;protein binding;zinc ion binding;metal ion binding	605308	33379.7
Zfp467	true	false	false	transcription, DNA-dependent;regulation of transcription, DNA-dependent	intracellular;nucleus	nucleic acid binding;DNA binding;protein binding;zinc ion binding;metal ion binding	605308	33379.7
Id1	true	false	false	negative regulation of transcription from RNA polymerase II promoter;endothelial cell morphogenesis;transcription, DNA-dependent;apoptotic process;multicellular organismal development;heart development;BMP signaling pathway;protein destabilization;collagen metabolic process;negative regulation of DNA binding;regulation of MAPKKK cascade;negative regulation of sequence-specific DNA binding transcr…	soluble fraction;nucleus;cytoplasm	sequence-specific DNA binding transcription factor activity;protein binding	37929.3	33359.1
Id1	true	false	false	negative regulation of transcription from RNA polymerase II promoter;endothelial cell morphogenesis;transcription, DNA-dependent;apoptotic process;multicellular organismal development;heart development;BMP signaling pathway;protein destabilization;collagen metabolic process;negative regulation of DNA binding;regulation of MAPKKK cascade;negative regulation of sequence-specific DNA binding transcr…	soluble fraction;nucleus;cytoplasm	sequence-specific DNA binding transcription factor activity;protein binding	37929.3	33359.1
Id1	true	false	false	negative regulation of transcription from RNA polymerase II promoter;endothelial cell morphogenesis;transcription, DNA-dependent;apoptotic process;multicellular organismal development;heart development;BMP signaling pathway;protein destabilization;collagen metabolic process;negative regulation of DNA binding;regulation of MAPKKK cascade;negative regulation of sequence-specific DNA binding transcr…	soluble fraction;nucleus;cytoplasm	sequence-specific DNA binding transcription factor activity;protein binding	37929.3	33359.1
Id1	true	false	false	negative regulation of transcription from RNA polymerase II promoter;endothelial cell morphogenesis;transcription, DNA-dependent;apoptotic process;multicellular organismal development;heart development;BMP signaling pathway;protein destabilization;collagen metabolic process;negative regulation of DNA binding;regulation of MAPKKK cascade;negative regulation of sequence-specific DNA binding transcr…	soluble fraction;nucleus;cytoplasm	sequence-specific DNA binding transcription factor activity;protein binding	37929.3	33359.1
Pmf1	true	false	false	transcription, DNA-dependent;regulation of transcription, DNA-dependent;cell cycle;chromosome segregation;mitosis;cell division;regulation of RNA biosynthetic process	MIS12/MIND type complex;chromosome, centromeric region;kinetochore;nucleus;chromosome	transcription coactivator activity;protein binding;leucine zipper domain binding	533511	32985.7
Rara	true	false	false	negative regulation of transcription from RNA polymerase II promoter;ureteric bud development;growth plate cartilage development;transcription, DNA-dependent;regulation of transcription, DNA-dependent;protein phosphorylation;signal transduction;germ cell development;spermatogenesis;positive regulation of cell proliferation;negative regulation of cell proliferation;male gonad development;positive …	nuclear chromatin;nucleus;cytoplasm;synaptosome;dendrite;neuronal cell body;perinuclear region of cytoplasm	translation repressor activity, nucleic acid binding;retinoic acid binding;DNA binding;sequence-specific DNA binding transcription factor activity;steroid hormone receptor activity;retinoic acid receptor activity;transcription coactivator activity;transcription corepressor activity;receptor activity;ligand-activated sequence-specific DNA binding RNA polymerase II transcription factor activity;rec…	1.2275e+06	32955.6
Rara	true	false	false	negative regulation of transcription from RNA polymerase II promoter;ureteric bud development;growth plate cartilage development;transcription, DNA-dependent;regulation of transcription, DNA-dependent;protein phosphorylation;signal transduction;germ cell development;spermatogenesis;positive regulation of cell proliferation;negative regulation of cell proliferation;male gonad development;positive …	nuclear chromatin;nucleus;cytoplasm;synaptosome;dendrite;neuronal cell body;perinuclear region of cytoplasm	translation repressor activity, nucleic acid binding;retinoic acid binding;DNA binding;sequence-specific DNA binding transcription factor activity;steroid hormone receptor activity;retinoic acid receptor activity;transcription coactivator activity;transcription corepressor activity;receptor activity;ligand-activated sequence-specific DNA binding RNA polymerase II transcription factor activity;rec…	1.2275e+06	32955.6
Klf3	false	false	false	transcription, DNA-dependent;regulation of transcription, DNA-dependent	intracellular;nucleus	nucleic acid binding;DNA binding;zinc ion binding;metal ion binding	875192	32893.3
Klf3	false	false	false	transcription, DNA-dependent;regulation of transcription, DNA-dependent	intracellular;nucleus	nucleic acid binding;DNA binding;zinc ion binding;metal ion binding	875192	32893.3
Klf3	true	false	false	transcription, DNA-dependent;regulation of transcription, DNA-dependent	intracellular;nucleus	nucleic acid binding;DNA binding;zinc ion binding;metal ion binding	875192	32893.3
Klf3	false	false	false	transcription, DNA-dependent;regulation of transcription, DNA-dependent	intracellular;nucleus	nucleic acid binding;DNA binding;zinc ion binding;metal ion binding	875192	32893.3
Klf3	false	true	false	transcription, DNA-dependent;regulation of transcription, DNA-dependent	intracellular;nucleus	nucleic acid binding;DNA binding;zinc ion binding;metal ion binding	875192	32893.3
Cry2	false	false	true	negative regulation of transcription from RNA polymerase II promoter;DNA repair;transcription, DNA-dependent;regulation of transcription, DNA-dependent;protein import into nucleus;signal transduction;circadian rhythm;protein-chromophore linkage;regulation of circadian rhythm;rhythmic process;response to stimulus	intracellular;nucleus;cytoplasm;mitochondrion	nucleotide binding;protein binding transcription factor activity;DNA binding;damaged DNA binding;single-stranded DNA binding;DNA photolyase activity;receptor activity;protein binding;photoreceptor activity;lyase activity	996504	32754.9
Cry2	false	false	true	negative regulation of transcription from RNA polymerase II promoter;DNA repair;transcription, DNA-dependent;regulation of transcription, DNA-dependent;protein import into nucleus;signal transduction;circadian rhythm;protein-chromophore linkage;regulation of circadian rhythm;rhythmic process;response to stimulus	intracellular;nucleus;cytoplasm;mitochondrion	nucleotide binding;protein binding transcription factor activity;DNA binding;damaged DNA binding;single-stranded DNA binding;DNA photolyase activity;receptor activity;protein binding;photoreceptor activity;lyase activity	996504	32754.9
Cry2	false	true	false	negative regulation of transcription from RNA polymerase II promoter;DNA repair;transcription, DNA-dependent;regulation of transcription, DNA-dependent;protein import into nucleus;signal transduction;circadian rhythm;protein-chromophore linkage;regulation of circadian rhythm;rhythmic process;response to stimulus	intracellular;nucleus;cytoplasm;mitochondrion	nucleotide binding;protein binding transcription factor activity;DNA binding;damaged DNA binding;single-stranded DNA binding;DNA photolyase activity;receptor activity;protein binding;photoreceptor activity;lyase activity	996504	32754.9
Mafk	false	true	false	transcription, DNA-dependent;regulation of transcription, DNA-dependent;nervous system development	nucleus	DNA binding;sequence-specific DNA binding transcription factor activity;protein binding;sequence-specific DNA binding	362863	32640.4
Mxd4	true	false	false	negative regulation of transcription, DNA-dependent		DNA binding;protein binding	355526	31940.2
Litaf	true	false	false	transcription, DNA-dependent;regulation of transcription, DNA-dependent;apoptotic process;signal transduction;positive regulation of I-kappaB kinase/NF-kappaB cascade	lysosome;Golgi apparatus;membrane	signal transducer activity;protein binding;WW domain binding	1.0526e+06	31097
Litaf	false	false	true	transcription, DNA-dependent;regulation of transcription, DNA-dependent;apoptotic process;signal transduction;positive regulation of I-kappaB kinase/NF-kappaB cascade	lysosome;Golgi apparatus;membrane	signal transducer activity;protein binding;WW domain binding	1.0526e+06	31097
Litaf	true	false	false	transcription, DNA-dependent;regulation of transcription, DNA-dependent;apoptotic process;signal transduction;positive regulation of I-kappaB kinase/NF-kappaB cascade	lysosome;Golgi apparatus;membrane	signal transducer activity;protein binding;WW domain binding	1.0526e+06	31097
Anp32a	false	true	false	transcription, DNA-dependent;regulation of transcription, DNA-dependent;nucleocytoplasmic transport	nucleus;cytoplasm;endoplasmic reticulum;nuclear matrix;perinuclear region of cytoplasm	protein binding;protein C-terminus binding;cell adhesion molecule binding	1.15425e+06	30813
Anp32a	true	false	false	transcription, DNA-dependent;regulation of transcription, DNA-dependent;nucleocytoplasmic transport	nucleus;cytoplasm;endoplasmic reticulum;nuclear matrix;perinuclear region of cytoplasm	protein binding;protein C-terminus binding;cell adhesion molecule binding	1.15425e+06	30813
Maged1	true	false	false	regulation of transcription from RNA polymerase II promoter;positive regulation of apoptotic process;positive regulation of MAP kinase activity;negative regulation of transcription, DNA-dependent;positive regulation of transcription, DNA-dependent;negative regulation of epithelial cell proliferation;positive regulation of branching involved in ureteric bud morphogenesis	cytoplasm;plasma membrane;membrane;protein complex	transcription coactivator activity;protein binding	202437	30667.6
Trip6	false	true	false	transcription, DNA-dependent;regulation of transcription, DNA-dependent;cell adhesion;release of cytoplasmic sequestered NF-kappaB;positive regulation of cell migration	nucleus;cytoplasm;cytoskeleton;focal adhesion;cell junction	receptor activity;interleukin-1 receptor binding;zinc ion binding;kinase binding;metal ion binding	132194	30438.5
Stat6	false	false	true	negative regulation of transcription from RNA polymerase II promoter;T-helper 1 cell lineage commitment;negative regulation of type 2 immune response;transcription, DNA-dependent;regulation of transcription, DNA-dependent;signal transduction;cytokine-mediated signaling pathway;response to cytokine stimulus;regulation of cell proliferation;positive regulation of transcription from RNA polymerase I…	nuclear chromatin;nucleus;cytoplasm	DNA binding;sequence-specific DNA binding transcription factor activity;signal transducer activity;calcium ion binding;sequence-specific DNA binding	547929	30437.1
Morf4l2	true	false	false	DNA repair;transcription, DNA-dependent;regulation of transcription, DNA-dependent;response to DNA damage stimulus;chromatin modification;regulation of growth	nucleus;nucleolus		323657	30146.9
Stat3	false	false	true	temperature homeostasis;eye photoreceptor cell differentiation;transcription, DNA-dependent;regulation of transcription, DNA-dependent;transcription from RNA polymerase II promoter;protein import into nucleus;acute-phase response;signal transduction;JAK-STAT cascade;cell proliferation;cytokine-mediated signaling pathway;sexual reproduction;response to estradiol stimulus;cellular response to hormo…	intracellular;nucleus;cytoplasm;plasma membrane	DNA binding;sequence-specific DNA binding transcription factor activity;signal transducer activity;calcium ion binding;protein binding;transcription factor binding;protein kinase binding;CCR5 chemokine receptor binding;glucocorticoid receptor binding;sequence-specific DNA binding;transcription regulatory region DNA binding;protein dimerization activity	1.5434e+06	29285.5
Nkx2-6	false	false	true	transcription, DNA-dependent;regulation of transcription, DNA-dependent;multicellular organismal development;heart development;positive regulation of cell proliferation;cell differentiation;embryonic heart tube development;negative regulation of apoptotic process;pharyngeal system development	cellular_component;nucleus	DNA binding;sequence-specific DNA binding transcription factor activity;sequence-specific DNA binding	102869	29207.7
Nkx2-6	false	false	true	transcription, DNA-dependent;regulation of transcription, DNA-dependent;multicellular organismal development;heart development;positive regulation of cell proliferation;cell differentiation;embryonic heart tube development;negative regulation of apoptotic process;pharyngeal system development	cellular_component;nucleus	DNA binding;sequence-specific DNA binding transcription factor activity;sequence-specific DNA binding	102869	29207.7
Ing2	false	false	false	transcription, DNA-dependent;regulation of transcription, DNA-dependent;chromatin modification;positive regulation of transforming growth factor beta receptor signaling pathway;regulation of growth;positive regulation of transcription, DNA-dependent	nucleus;Sin3 complex;CCAAT-binding factor complex	DNA binding;zinc ion binding;protein complex binding;methylated histone residue binding;phosphatidylinositol binding;metal ion binding	232798	29165.3
Smad7	true	false	false	negative regulation of transcription from RNA polymerase II promoter;transcription, DNA-dependent;regulation of transcription, DNA-dependent;transforming growth factor beta receptor signaling pathway;negative regulation of peptidyl-threonine phosphorylation;negative regulation of transcription by competitive promoter binding;regulation of transforming growth factor beta receptor signaling pathway…	intracellular;nucleus;transcription factor complex;nucleolus;cytoplasm;centrosome;plasma membrane;protein complex	sequence-specific DNA binding transcription factor activity;protein binding;collagen binding;beta-catenin binding;transforming growth factor beta receptor, inhibitory cytoplasmic mediator activity;ubiquitin protein ligase binding;type I transforming growth factor beta receptor binding;transcription regulatory region DNA binding;activin binding;I-SMAD binding	807531	28265
Gtf3a	false	false	false	transcription, DNA-dependent;regulation of transcription, DNA-dependent	intracellular;nucleus	nucleic acid binding;DNA binding;sequence-specific DNA binding transcription factor activity;RNA binding;zinc ion binding;metal ion binding	195405	28083.4
Gtf3a	true	false	false	transcription, DNA-dependent;regulation of transcription, DNA-dependent	intracellular;nucleus	nucleic acid binding;DNA binding;sequence-specific DNA binding transcription factor activity;RNA binding;zinc ion binding;metal ion binding	195405	28083.4
Sf1	true	false	false	transcription, DNA-dependent;regulation of transcription, DNA-dependent;mRNA processing;RNA splicing;cell cycle process;male sex determination;Leydig cell differentiation;negative regulation of smooth muscle cell proliferation;regulation of steroid biosynthetic process	nucleus;spliceosomal complex;cytoplasm	nucleic acid binding;RNA binding;zinc ion binding;metal ion binding	399469	27839.5
Lpin2	false	false	true	transcription, DNA-dependent;regulation of transcription, DNA-dependent;lipid metabolic process;fatty acid metabolic process;positive regulation of transcription from RNA polymerase II promoter	nucleus;cytoplasm;endoplasmic reticulum;endoplasmic reticulum membrane;cytosol;membrane	transcription coactivator activity;phosphatidate phosphatase activity;hydrolase activity	1.81474e+06	27562.5
Lpin2	false	false	true	transcription, DNA-dependent;regulation of transcription, DNA-dependent;lipid metabolic process;fatty acid metabolic process;positive regulation of transcription from RNA polymerase II promoter	nucleus;cytoplasm;endoplasmic reticulum;endoplasmic reticulum membrane;cytosol;membrane	transcription coactivator activity;phosphatidate phosphatase activity;hydrolase activity	1.81474e+06	27562.5
Lpin2	false	false	true	transcription, DNA-dependent;regulation of transcription, DNA-dependent;lipid metabolic process;fatty acid metabolic process;positive regulation of transcription from RNA polymerase II promoter	nucleus;cytoplasm;endoplasmic reticulum;endoplasmic reticulum membrane;cytosol;membrane	transcription coactivator activity;phosphatidate phosphatase activity;hydrolase activity	1.81474e+06	27562.5
Zbtb16	false	false	false	skeletal system development;mesonephros development;regulation of transcription, DNA-dependent;central nervous system development;negative regulation of cell proliferation;embryonic pattern specification;anterior/posterior pattern specification;hemopoiesis;embryonic limb morphogenesis;positive regulation of chondrocyte differentiation;protein localization to nucleus;embryonic hindlimb morphogenes…	nucleus;cytosol;plasma membrane;nuclear body;PML body;nuclear speck;transcriptional repressor complex	DNA binding;double-stranded DNA binding;sequence-specific DNA binding transcription factor activity;protein binding;protein C-terminus binding;protein domain specific binding;identical protein binding;protein homodimerization activity;metal ion binding	4.97344e+06	27379.4
Zbtb16	false	false	true	skeletal system development;mesonephros development;regulation of transcription, DNA-dependent;central nervous system development;negative regulation of cell proliferation;embryonic pattern specification;anterior/posterior pattern specification;hemopoiesis;embryonic limb morphogenesis;positive regulation of chondrocyte differentiation;protein localization to nucleus;embryonic hindlimb morphogenes…	nucleus;cytosol;plasma membrane;nuclear body;PML body;nuclear speck;transcriptional repressor complex	DNA binding;double-stranded DNA binding;sequence-specific DNA binding transcription factor activity;protein binding;protein C-terminus binding;protein domain specific binding;identical protein binding;protein homodimerization activity;metal ion binding	4.97344e+06	27379.4
Zbtb16	false	false	true	skeletal system development;mesonephros development;regulation of transcription, DNA-dependent;central nervous system development;negative regulation of cell proliferation;embryonic pattern specification;anterior/posterior pattern specification;hemopoiesis;embryonic limb morphogenesis;positive regulation of chondrocyte differentiation;protein localization to nucleus;embryonic hindlimb morphogenes…	nucleus;cytosol;plasma membrane;nuclear body;PML body;nuclear speck;transcriptional repressor complex	DNA binding;double-stranded DNA binding;sequence-specific DNA binding transcription factor activity;protein binding;protein C-terminus binding;protein domain specific binding;identical protein binding;protein homodimerization activity;metal ion binding	4.97344e+06	27379.4
Zbtb16	false	true	false	skeletal system development;mesonephros development;regulation of transcription, DNA-dependent;central nervous system development;negative regulation of cell proliferation;embryonic pattern specification;anterior/posterior pattern specification;hemopoiesis;embryonic limb morphogenesis;positive regulation of chondrocyte differentiation;protein localization to nucleus;embryonic hindlimb morphogenes…	nucleus;cytosol;plasma membrane;nuclear body;PML body;nuclear speck;transcriptional repressor complex	DNA binding;double-stranded DNA binding;sequence-specific DNA binding transcription factor activity;protein binding;protein C-terminus binding;protein domain specific binding;identical protein binding;protein homodimerization activity;metal ion binding	4.97344e+06	27379.4
E2f4	true	false	false	regulation of transcription involved in G1/S phase of mitotic cell cycle;epithelial cell development;transcription, DNA-dependent;regulation of transcription, DNA-dependent;cell volume homeostasis;cell cycle;blood circulation;regulation of cell size;organ morphogenesis;regulation of cell proliferation;cilium assembly;regulation of cell cycle	nucleus;transcription factor complex;cytoplasm	DNA binding;sequence-specific DNA binding transcription factor activity;protein binding;transcription factor binding;protein domain specific binding	210247	27276.4
Cited2	true	false	false	negative regulation of transcription from RNA polymerase II promoter;blood vessel development;vasculogenesis;response to hypoxia;in utero embryonic development;trophectodermal cell differentiation;neural tube formation;neural tube closure;liver development;embryonic placenta development;vasculature development;heart looping;lens morphogenesis in camera-type eye;hemopoietic progenitor cell differe…	nucleus;cytoplasm	RNA polymerase II activating transcription factor binding;RNA polymerase II transcription coactivator activity;chromatin binding;transcription cofactor activity;transcription coactivator activity;transcription corepressor activity;SMAD binding;LBD domain binding	66281.2	27086.7
Cited2	false	false	true	negative regulation of transcription from RNA polymerase II promoter;blood vessel development;vasculogenesis;response to hypoxia;in utero embryonic development;trophectodermal cell differentiation;neural tube formation;neural tube closure;liver development;embryonic placenta development;vasculature development;heart looping;lens morphogenesis in camera-type eye;hemopoietic progenitor cell differe…	nucleus;cytoplasm	RNA polymerase II activating transcription factor binding;RNA polymerase II transcription coactivator activity;chromatin binding;transcription cofactor activity;transcription coactivator activity;transcription corepressor activity;SMAD binding;LBD domain binding	66281.2	27086.7
Cited2	false	false	true	negative regulation of transcription from RNA polymerase II promoter;blood vessel development;vasculogenesis;response to hypoxia;in utero embryonic development;trophectodermal cell differentiation;neural tube formation;neural tube closure;liver development;embryonic placenta development;vasculature development;heart looping;lens morphogenesis in camera-type eye;hemopoietic progenitor cell differe…	nucleus;cytoplasm	RNA polymerase II activating transcription factor binding;RNA polymerase II transcription coactivator activity;chromatin binding;transcription cofactor activity;transcription coactivator activity;transcription corepressor activity;SMAD binding;LBD domain binding	66281.2	27086.7
Cited2	false	false	false	negative regulation of transcription from RNA polymerase II promoter;blood vessel development;vasculogenesis;response to hypoxia;in utero embryonic development;trophectodermal cell differentiation;neural tube formation;neural tube closure;liver development;embryonic placenta development;vasculature development;heart looping;lens morphogenesis in camera-type eye;hemopoietic progenitor cell differe…	nucleus;cytoplasm	RNA polymerase II activating transcription factor binding;RNA polymerase II transcription coactivator activity;chromatin binding;transcription cofactor activity;transcription coactivator activity;transcription corepressor activity;SMAD binding;LBD domain binding	66281.2	27086.7
Cited2	false	true	false	negative regulation of transcription from RNA polymerase II promoter;blood vessel development;vasculogenesis;response to hypoxia;in utero embryonic development;trophectodermal cell differentiation;neural tube formation;neural tube closure;liver development;embryonic placenta development;vasculature development;heart looping;lens morphogenesis in camera-type eye;hemopoietic progenitor cell differe…	nucleus;cytoplasm	RNA polymerase II activating transcription factor binding;RNA polymerase II transcription coactivator activity;chromatin binding;transcription cofactor activity;transcription coactivator activity;transcription corepressor activity;SMAD binding;LBD domain binding	66281.2	27086.7
Zfp574	false	false	false	transcription, DNA-dependent;regulation of transcription, DNA-dependent;biological_process	cellular_component;intracellular;nucleus	molecular_function;nucleic acid binding;DNA binding;zinc ion binding;metal ion binding	170208	27068.7
Notch1	false	true	false	in utero embryonic development;cell fate specification;epithelial to mesenchymal transition;liver development;sprouting angiogenesis;positive regulation of neuroblast proliferation;inflammatory response to antigenic stimulus;aortic valve morphogenesis;cardiac right ventricle formation;regulation of cardioblast proliferation;Notch signaling pathway involved in regulation of secondary heart field c…	acrosomal vesicle;MAML1-RBP-Jkappa- ICN1 complex;cell;nucleus;cytoplasm;Golgi apparatus;plasma membrane;integral to membrane	chromatin binding;sequence-specific DNA binding transcription factor activity;receptor activity;chromatin DNA binding;sequence-specific DNA binding	1.2424e+06	27055.3
Notch1	false	true	false	in utero embryonic development;cell fate specification;epithelial to mesenchymal transition;liver development;sprouting angiogenesis;positive regulation of neuroblast proliferation;inflammatory response to antigenic stimulus;aortic valve morphogenesis;cardiac right ventricle formation;regulation of cardioblast proliferation;Notch signaling pathway involved in regulation of secondary heart field c…	acrosomal vesicle;MAML1-RBP-Jkappa- ICN1 complex;cell;nucleus;cytoplasm;Golgi apparatus;plasma membrane;integral to membrane	chromatin binding;sequence-specific DNA binding transcription factor activity;receptor activity;chromatin DNA binding;sequence-specific DNA binding	1.2424e+06	27055.3
Zbtb43	true	false	false	transcription, DNA-dependent;regulation of transcription, DNA-dependent;biological_process	intracellular;nucleus	molecular_function;nucleic acid binding;DNA binding;zinc ion binding;metal ion binding	483014	26473.8
Nr1i2	true	false	false	transcription, DNA-dependent;regulation of transcription, DNA-dependent;regulation of transcription from RNA polymerase II promoter;xenobiotic metabolic process;positive regulation of gene expression;intracellular receptor mediated signaling pathway;exogenous drug catabolic process;xenobiotic transport;steroid hormone mediated signaling pathway;negative regulation of transcription, DNA-dependent;…	nucleus	DNA binding;sequence-specific DNA binding transcription factor activity;steroid hormone receptor activity;receptor activity;ligand-activated sequence-specific DNA binding RNA polymerase II transcription factor activity;protein binding;drug binding;zinc ion binding;sequence-specific DNA binding;metal ion binding	1.22271e+06	26308.3
Zbtb32	true	false	false	regulation of cytokine production;transcription, DNA-dependent;regulation of transcription, DNA-dependent;hemopoiesis;T cell proliferation;regulation of RNA biosynthetic process	nuclear chromosome;intracellular;nucleus	nucleic acid binding;DNA binding;transcription corepressor activity;zinc ion binding;metal ion binding	85427.6	26188.7
Six5	true	false	false	lens development in camera-type eye;transcription, DNA-dependent;regulation of transcription, DNA-dependent;multicellular organismal development;spermatid development;negative regulation of cell proliferation	nucleus;cytoplasm	DNA binding;sequence-specific DNA binding transcription factor activity;sequence-specific DNA binding	99351.4	26131.3
Mef2d	false	false	true	osteoblast differentiation;endochondral ossification;chondrocyte differentiation;transcription, DNA-dependent;regulation of transcription, DNA-dependent;transcription from RNA polymerase II promoter;apoptotic process;multicellular organismal development;nervous system development;cell differentiation;positive regulation of transcription, DNA-dependent;positive regulation of transcription from RNA…	nucleus;intracellular membrane-bounded organelle	RNA polymerase II regulatory region sequence-specific DNA binding;sequence-specific DNA binding RNA polymerase II transcription factor activity;DNA binding;sequence-specific DNA binding transcription factor activity;enzyme binding;activating transcription factor binding;protein homodimerization activity;histone deacetylase binding;protein heterodimerization activity;protein dimerization activity	689339	25747.5
Ahr	false	true	false	negative regulation of transcription from RNA polymerase II promoter;cell morphogenesis;ovarian follicle development;blood vessel development;patterning of blood vessels;B cell homeostasis;liver development;B-1 B cell homeostasis;blood vessel remodeling;lymphocyte homeostasis;immune system process;negative regulation of systemic arterial blood pressure;cardiac left ventricle morphogenesis;circumf…	nucleus;transcription factor complex;cytoplasm;cytosol;aryl hydrocarbon receptor complex;cytosolic aryl hydrocarbon receptor complex;nuclear aryl hydrocarbon receptor complex	DNA binding;sequence-specific DNA binding transcription factor activity;sequence-specific distal enhancer binding RNA polymerase II transcription factor activity;signal transducer activity;receptor activity;aryl hydrocarbon receptor activity;ligand-activated sequence-specific DNA binding RNA polymerase II transcription factor activity;protein binding;transcription factor binding;sequence-specific…	951132	25698.6
Ahr	false	false	false	negative regulation of transcription from RNA polymerase II promoter;cell morphogenesis;ovarian follicle development;blood vessel development;patterning of blood vessels;B cell homeostasis;liver development;B-1 B cell homeostasis;blood vessel remodeling;lymphocyte homeostasis;immune system process;negative regulation of systemic arterial blood pressure;cardiac left ventricle morphogenesis;circumf…	nucleus;transcription factor complex;cytoplasm;cytosol;aryl hydrocarbon receptor complex;cytosolic aryl hydrocarbon receptor complex;nuclear aryl hydrocarbon receptor complex	DNA binding;sequence-specific DNA binding transcription factor activity;sequence-specific distal enhancer binding RNA polymerase II transcription factor activity;signal transducer activity;receptor activity;aryl hydrocarbon receptor activity;ligand-activated sequence-specific DNA binding RNA polymerase II transcription factor activity;protein binding;transcription factor binding;sequence-specific…	951132	25698.6
Ahr	false	false	true	negative regulation of transcription from RNA polymerase II promoter;cell morphogenesis;ovarian follicle development;blood vessel development;patterning of blood vessels;B cell homeostasis;liver development;B-1 B cell homeostasis;blood vessel remodeling;lymphocyte homeostasis;immune system process;negative regulation of systemic arterial blood pressure;cardiac left ventricle morphogenesis;circumf…	nucleus;transcription factor complex;cytoplasm;cytosol;aryl hydrocarbon receptor complex;cytosolic aryl hydrocarbon receptor complex;nuclear aryl hydrocarbon receptor complex	DNA binding;sequence-specific DNA binding transcription factor activity;sequence-specific distal enhancer binding RNA polymerase II transcription factor activity;signal transducer activity;receptor activity;aryl hydrocarbon receptor activity;ligand-activated sequence-specific DNA binding RNA polymerase II transcription factor activity;protein binding;transcription factor binding;sequence-specific…	951132	25698.6
Fosl2	true	false	false	response to hypoxia;regulation of transcription, DNA-dependent;transcription from RNA polymerase II promoter;response to estradiol stimulus;positive regulation of transcription, DNA-dependent;positive regulation of fibroblast proliferation	nucleus	DNA binding;double-stranded DNA binding;sequence-specific DNA binding transcription factor activity;sequence-specific DNA binding;protein dimerization activity	535583	25064.7
Fosl2	false	false	true	response to hypoxia;regulation of transcription, DNA-dependent;transcription from RNA polymerase II promoter;response to estradiol stimulus;positive regulation of transcription, DNA-dependent;positive regulation of fibroblast proliferation	nucleus	DNA binding;double-stranded DNA binding;sequence-specific DNA binding transcription factor activity;sequence-specific DNA binding;protein dimerization activity	535583	25064.7
Fosl2	true	false	false	response to hypoxia;regulation of transcription, DNA-dependent;transcription from RNA polymerase II promoter;response to estradiol stimulus;positive regulation of transcription, DNA-dependent;positive regulation of fibroblast proliferation	nucleus	DNA binding;double-stranded DNA binding;sequence-specific DNA binding transcription factor activity;sequence-specific DNA binding;protein dimerization activity	535583	25064.7
Fosl2	false	false	true	response to hypoxia;regulation of transcription, DNA-dependent;transcription from RNA polymerase II promoter;response to estradiol stimulus;positive regulation of transcription, DNA-dependent;positive regulation of fibroblast proliferation	nucleus	DNA binding;double-stranded DNA binding;sequence-specific DNA binding transcription factor activity;sequence-specific DNA binding;protein dimerization activity	535583	25064.7
Zfp710	false	true	false	transcription, DNA-dependent;regulation of transcription, DNA-dependent;biological_process	cellular_component;intracellular;nucleus	molecular_function;nucleic acid binding;DNA binding;zinc ion binding;metal ion binding	1.70011e+06	25024.4
Eno1	false	false	false	in utero embryonic development;negative regulation of cell growth;negative regulation of transcription, DNA-dependent;positive regulation of binding;cellular response to acid	soluble fraction;insoluble fraction;cytoplasm;synaptosome;extrinsic to plasma membrane	phosphopyruvate hydratase activity;protein binding;protein homodimerization activity;protein heterodimerization activity	288038	24667.1
Cxxc1	true	false	false	transcription, DNA-dependent;regulation of transcription, DNA-dependent;positive regulation of transcription, DNA-dependent;histone H3-K4 methylation	nucleus;nuclear matrix;nuclear speck;histone methyltransferase complex;Set1C/COMPASS complex	DNA binding;zinc ion binding;unmethylated CpG binding;metal ion binding	129294	24487.5
Wbp7	true	false	false	transcription, DNA-dependent;regulation of transcription, DNA-dependent;chromatin modification;peptidyl-lysine methylation;methylation;histone lysine methylation	nucleus;histone methyltransferase complex	DNA binding;methyltransferase activity;zinc ion binding;transferase activity;histone-lysine N-methyltransferase activity;histone methyltransferase activity (H3-K4 specific);metal ion binding	485188	24415.7
Csrnp2	false	true	false	transcription, DNA-dependent;regulation of transcription, DNA-dependent;apoptotic process;negative regulation of phosphatase activity;positive regulation of transcription from RNA polymerase II promoter	nucleus	DNA binding;sequence-specific DNA binding transcription factor activity;phosphatase binding	381148	24323.4
Zfp187	true	false	false	transcription, DNA-dependent;regulation of transcription, DNA-dependent;biological_process;viral reproduction	cellular_component;intracellular;nucleus	molecular_function;nucleic acid binding;sequence-specific DNA binding transcription factor activity;zinc ion binding;metal ion binding	275151	23816.4
Zfp187	true	false	false	transcription, DNA-dependent;regulation of transcription, DNA-dependent;biological_process;viral reproduction	cellular_component;intracellular;nucleus	molecular_function;nucleic acid binding;sequence-specific DNA binding transcription factor activity;zinc ion binding;metal ion binding	275151	23816.4
Ptges2	false	true	false	prostaglandin biosynthetic process;fatty acid biosynthetic process;lipid biosynthetic process;cell redox homeostasis;positive regulation of transcription, DNA-dependent;secretion	nucleus;cytoplasm;mitochondrion;Golgi apparatus;cytosol;membrane;integral to membrane	DNA binding;electron carrier activity;protein disulfide oxidoreductase activity;isomerase activity;prostaglandin-E synthase activity	160857	23479.3
Epas1	false	false	false	angiogenesis;response to hypoxia;embryonic placenta development;blood vessel remodeling;regulation of heart rate;transcription, DNA-dependent;regulation of transcription, DNA-dependent;response to oxidative stress;mitochondrion organization;signal transduction;multicellular organismal development;visual perception;hemopoiesis;cell differentiation;erythrocyte differentiation;lung development;norep…	nucleus;transcription factor complex;cytoplasm	DNA binding;sequence-specific DNA binding transcription factor activity;signal transducer activity;transcription factor binding;histone acetyltransferase binding;sequence-specific DNA binding;protein heterodimerization activity	1.86664e+06	23465.9
Epas1	true	false	false	angiogenesis;response to hypoxia;embryonic placenta development;blood vessel remodeling;regulation of heart rate;transcription, DNA-dependent;regulation of transcription, DNA-dependent;response to oxidative stress;mitochondrion organization;signal transduction;multicellular organismal development;visual perception;hemopoiesis;cell differentiation;erythrocyte differentiation;lung development;norep…	nucleus;transcription factor complex;cytoplasm	DNA binding;sequence-specific DNA binding transcription factor activity;signal transducer activity;transcription factor binding;histone acetyltransferase binding;sequence-specific DNA binding;protein heterodimerization activity	1.86664e+06	23465.9
Epas1	false	false	true	angiogenesis;response to hypoxia;embryonic placenta development;blood vessel remodeling;regulation of heart rate;transcription, DNA-dependent;regulation of transcription, DNA-dependent;response to oxidative stress;mitochondrion organization;signal transduction;multicellular organismal development;visual perception;hemopoiesis;cell differentiation;erythrocyte differentiation;lung development;norep…	nucleus;transcription factor complex;cytoplasm	DNA binding;sequence-specific DNA binding transcription factor activity;signal transducer activity;transcription factor binding;histone acetyltransferase binding;sequence-specific DNA binding;protein heterodimerization activity	1.86664e+06	23465.9
Epas1	true	false	false	angiogenesis;response to hypoxia;embryonic placenta development;blood vessel remodeling;regulation of heart rate;transcription, DNA-dependent;regulation of transcription, DNA-dependent;response to oxidative stress;mitochondrion organization;signal transduction;multicellular organismal development;visual perception;hemopoiesis;cell differentiation;erythrocyte differentiation;lung development;norep…	nucleus;transcription factor complex;cytoplasm	DNA binding;sequence-specific DNA binding transcription factor activity;signal transducer activity;transcription factor binding;histone acetyltransferase binding;sequence-specific DNA binding;protein heterodimerization activity	1.86664e+06	23465.9
Vgll4	false	true	false	transcription, DNA-dependent;regulation of transcription, DNA-dependent;biological_process	nucleus;nucleolus	molecular_function	1.38759e+06	23257.1
Vgll4	true	false	false	transcription, DNA-dependent;regulation of transcription, DNA-dependent;biological_process	nucleus;nucleolus	molecular_function	1.38759e+06	23257.1
Vgll4	true	false	false	transcription, DNA-dependent;regulation of transcription, DNA-dependent;biological_process	nucleus;nucleolus	molecular_function	1.38759e+06	23257.1
Vgll4	false	true	false	transcription, DNA-dependent;regulation of transcription, DNA-dependent;biological_process	nucleus;nucleolus	molecular_function	1.38759e+06	23257.1
Vgll4	true	false	false	transcription, DNA-dependent;regulation of transcription, DNA-dependent;biological_process	nucleus;nucleolus	molecular_function	1.38759e+06	23257.1
Vgll4	false	false	false	transcription, DNA-dependent;regulation of transcription, DNA-dependent;biological_process	nucleus;nucleolus	molecular_function	1.38759e+06	23257.1
Vgll4	true	false	false	transcription, DNA-dependent;regulation of transcription, DNA-dependent;biological_process	nucleus;nucleolus	molecular_function	1.38759e+06	23257.1
Vgll4	true	false	false	transcription, DNA-dependent;regulation of transcription, DNA-dependent;biological_process	nucleus;nucleolus	molecular_function	1.38759e+06	23257.1
Vgll4	false	false	true	transcription, DNA-dependent;regulation of transcription, DNA-dependent;biological_process	nucleus;nucleolus	molecular_function	1.38759e+06	23257.1
Hdac11	false	true	false	transcription, DNA-dependent;regulation of transcription, DNA-dependent;oligodendrocyte development;chromatin modification;histone deacetylation	histone deacetylase complex;nucleus;cytoplasm;plasma membrane	histone deacetylase activity;protein binding;transcription factor binding;hydrolase activity;histone deacetylase activity (H3-K14 specific);NAD-dependent histone deacetylase activity (H3-K14 specific);histone deacetylase activity (H3-K9 specific);histone deacetylase activity (H3-K16 specific);NAD-dependent histone deacetylase activity (H3-K9 specific);NAD-dependent histone deacetylase activity (H…	415190	23235.2
Hdac10	true	false	false	negative regulation of transcription from RNA polymerase II promoter;regulation of transcription, DNA-dependent;protein deacetylation;metabolic process;histone deacetylation;negative regulation of transcription, DNA-dependent	histone deacetylase complex;nucleus;nucleoplasm;cytoplasm	histone deacetylase activity;hydrolase activity;enzyme binding;protein deacetylase activity;histone deacetylase binding	124984	23153.8
Ets2	false	true	false	regulation of transcription, DNA-dependent;positive regulation of transcription, DNA-dependent;positive regulation of transcription from RNA polymerase II promoter	nucleus	RNA polymerase II regulatory region sequence-specific DNA binding;DNA binding;sequence-specific DNA binding transcription factor activity;glucocorticoid receptor binding;sequence-specific DNA binding	431076	23122.7
Ets2	true	false	false	regulation of transcription, DNA-dependent;positive regulation of transcription, DNA-dependent;positive regulation of transcription from RNA polymerase II promoter	nucleus	RNA polymerase II regulatory region sequence-specific DNA binding;DNA binding;sequence-specific DNA binding transcription factor activity;glucocorticoid receptor binding;sequence-specific DNA binding	431076	23122.7
Ets2	false	true	false	regulation of transcription, DNA-dependent;positive regulation of transcription, DNA-dependent;positive regulation of transcription from RNA polymerase II promoter	nucleus	RNA polymerase II regulatory region sequence-specific DNA binding;DNA binding;sequence-specific DNA binding transcription factor activity;glucocorticoid receptor binding;sequence-specific DNA binding	431076	23122.7
Ets2	true	false	false	regulation of transcription, DNA-dependent;positive regulation of transcription, DNA-dependent;positive regulation of transcription from RNA polymerase II promoter	nucleus	RNA polymerase II regulatory region sequence-specific DNA binding;DNA binding;sequence-specific DNA binding transcription factor activity;glucocorticoid receptor binding;sequence-specific DNA binding	431076	23122.7
Foxo3	true	false	false	negative regulation of transcription from RNA polymerase II promoter;ovulation from ovarian follicle;initiation of primordial ovarian follicle growth;antral ovarian follicle growth;oocyte maturation;transcription, DNA-dependent;regulation of transcription, DNA-dependent;apoptotic process;induction of apoptosis;pattern specification process;insulin receptor signaling pathway;embryo development;tis…	membrane fraction;nucleus;transcription factor complex;cytoplasm;cytosol	DNA binding;double-stranded DNA binding;sequence-specific DNA binding transcription factor activity;sequence-specific distal enhancer binding RNA polymerase II transcription factor activity;transcription factor binding;DNA binding, bending;protein kinase binding;sequence-specific DNA binding	2.0941e+06	23022.9
Foxo3	true	false	false	negative regulation of transcription from RNA polymerase II promoter;ovulation from ovarian follicle;initiation of primordial ovarian follicle growth;antral ovarian follicle growth;oocyte maturation;transcription, DNA-dependent;regulation of transcription, DNA-dependent;apoptotic process;induction of apoptosis;pattern specification process;insulin receptor signaling pathway;embryo development;tis…	membrane fraction;nucleus;transcription factor complex;cytoplasm;cytosol	DNA binding;double-stranded DNA binding;sequence-specific DNA binding transcription factor activity;sequence-specific distal enhancer binding RNA polymerase II transcription factor activity;transcription factor binding;DNA binding, bending;protein kinase binding;sequence-specific DNA binding	2.0941e+06	23022.9
Foxo3	true	false	false	negative regulation of transcription from RNA polymerase II promoter;ovulation from ovarian follicle;initiation of primordial ovarian follicle growth;antral ovarian follicle growth;oocyte maturation;transcription, DNA-dependent;regulation of transcription, DNA-dependent;apoptotic process;induction of apoptosis;pattern specification process;insulin receptor signaling pathway;embryo development;tis…	membrane fraction;nucleus;transcription factor complex;cytoplasm;cytosol	DNA binding;double-stranded DNA binding;sequence-specific DNA binding transcription factor activity;sequence-specific distal enhancer binding RNA polymerase II transcription factor activity;transcription factor binding;DNA binding, bending;protein kinase binding;sequence-specific DNA binding	2.0941e+06	23022.9
Foxo3	false	false	true	negative regulation of transcription from RNA polymerase II promoter;ovulation from ovarian follicle;initiation of primordial ovarian follicle growth;antral ovarian follicle growth;oocyte maturation;transcription, DNA-dependent;regulation of transcription, DNA-dependent;apoptotic process;induction of apoptosis;pattern specification process;insulin receptor signaling pathway;embryo development;tis…	membrane fraction;nucleus;transcription factor complex;cytoplasm;cytosol	DNA binding;double-stranded DNA binding;sequence-specific DNA binding transcription factor activity;sequence-specific distal enhancer binding RNA polymerase II transcription factor activity;transcription factor binding;DNA binding, bending;protein kinase binding;sequence-specific DNA binding	2.0941e+06	23022.9
Foxo3	true	false	false	negative regulation of transcription from RNA polymerase II promoter;ovulation from ovarian follicle;initiation of primordial ovarian follicle growth;antral ovarian follicle growth;oocyte maturation;transcription, DNA-dependent;regulation of transcription, DNA-dependent;apoptotic process;induction of apoptosis;pattern specification process;insulin receptor signaling pathway;embryo development;tis…	membrane fraction;nucleus;transcription factor complex;cytoplasm;cytosol	DNA binding;double-stranded DNA binding;sequence-specific DNA binding transcription factor activity;sequence-specific distal enhancer binding RNA polymerase II transcription factor activity;transcription factor binding;DNA binding, bending;protein kinase binding;sequence-specific DNA binding	2.0941e+06	23022.9
Foxo3	false	true	false	negative regulation of transcription from RNA polymerase II promoter;ovulation from ovarian follicle;initiation of primordial ovarian follicle growth;antral ovarian follicle growth;oocyte maturation;transcription, DNA-dependent;regulation of transcription, DNA-dependent;apoptotic process;induction of apoptosis;pattern specification process;insulin receptor signaling pathway;embryo development;tis…	membrane fraction;nucleus;transcription factor complex;cytoplasm;cytosol	DNA binding;double-stranded DNA binding;sequence-specific DNA binding transcription factor activity;sequence-specific distal enhancer binding RNA polymerase II transcription factor activity;transcription factor binding;DNA binding, bending;protein kinase binding;sequence-specific DNA binding	2.0941e+06	23022.9
Foxo3	true	false	false	negative regulation of transcription from RNA polymerase II promoter;ovulation from ovarian follicle;initiation of primordial ovarian follicle growth;antral ovarian follicle growth;oocyte maturation;transcription, DNA-dependent;regulation of transcription, DNA-dependent;apoptotic process;induction of apoptosis;pattern specification process;insulin receptor signaling pathway;embryo development;tis…	membrane fraction;nucleus;transcription factor complex;cytoplasm;cytosol	DNA binding;double-stranded DNA binding;sequence-specific DNA binding transcription factor activity;sequence-specific distal enhancer binding RNA polymerase II transcription factor activity;transcription factor binding;DNA binding, bending;protein kinase binding;sequence-specific DNA binding	2.0941e+06	23022.9
Cebpg	false	true	false	nucleosome disassembly;chromatin remodeling;transcription, DNA-dependent;regulation of transcription, DNA-dependent;regulation of transcription from RNA polymerase II promoter;immune response;mRNA metabolic process;natural killer cell mediated cytotoxicity;enucleate erythrocyte differentiation;negative regulation of sequence-specific DNA binding transcription factor activity;positive regulation o…	nucleus	DNA binding;double-stranded DNA binding;sequence-specific DNA binding transcription factor activity;protein binding;transcription factor binding;protein homodimerization activity;sequence-specific DNA binding;protein heterodimerization activity;protein dimerization activity	232061	22874.5
Naca	true	false	false	transcription, DNA-dependent;regulation of transcription, DNA-dependent;transport;protein transport;regulation of RNA biosynthetic process	nucleus;cytoplasm	DNA binding;transcription coactivator activity;TBP-class protein binding	302262	22740.1
Prmt5	false	true	false	negative regulation of transcription from RNA polymerase II promoter;spliceosomal snRNP assembly;transcription, DNA-dependent;regulation of transcription, DNA-dependent;chromatin modification;peptidyl-arginine methylation;peptidyl-arginine methylation, to symmetrical-dimethyl arginine;methylation;histone arginine methylation;peptidyl-arginine N-methylation	nucleus;cytoplasm;protein complex	chromatin binding;protein binding;methyltransferase activity;histone-arginine N-methyltransferase activity;transferase activity;protein-arginine omega-N symmetric methyltransferase activity;ribonucleoprotein complex binding	233327	22677.3
Trib3	true	false	false	transcription, DNA-dependent;regulation of transcription, DNA-dependent;protein phosphorylation;negative regulation of protein kinase activity;apoptotic process;regulation of glucose transport;positive regulation of protein binding;positive regulation of proteasomal ubiquitin-dependent protein catabolic process;cellular response to insulin stimulus;negative regulation of phosphorylation;regulatio…	nucleus	transcription corepressor activity;protein kinase activity;protein kinase inhibitor activity;protein binding;ATP binding;transferase activity, transferring phosphorus-containing groups;enzyme binding;protein kinase binding;ubiquitin protein ligase binding;ubiquitin-protein ligase regulator activity	149179	22480.3
Trib3	false	true	false	transcription, DNA-dependent;regulation of transcription, DNA-dependent;protein phosphorylation;negative regulation of protein kinase activity;apoptotic process;regulation of glucose transport;positive regulation of protein binding;positive regulation of proteasomal ubiquitin-dependent protein catabolic process;cellular response to insulin stimulus;negative regulation of phosphorylation;regulatio…	nucleus	transcription corepressor activity;protein kinase activity;protein kinase inhibitor activity;protein binding;ATP binding;transferase activity, transferring phosphorus-containing groups;enzyme binding;protein kinase binding;ubiquitin protein ligase binding;ubiquitin-protein ligase regulator activity	149179	22480.3
Sub1	false	false	false	transcription, DNA-dependent;regulation of transcription, DNA-dependent;regulation of transcription from RNA polymerase II promoter	nucleus;transcription factor complex;nucleolus	DNA binding;single-stranded DNA binding;transcription coactivator activity	319792	21800.6
Sub1	false	false	true	transcription, DNA-dependent;regulation of transcription, DNA-dependent;regulation of transcription from RNA polymerase II promoter	nucleus;transcription factor complex;nucleolus	DNA binding;single-stranded DNA binding;transcription coactivator activity	319792	21800.6
Supt5h	false	true	false	negative regulation of transcription from RNA polymerase II promoter;transcription, DNA-dependent;transcription elongation, DNA-dependent;regulation of transcription, DNA-dependent;regulation of transcription from RNA polymerase II promoter;transcription elongation from RNA polymerase II promoter;regulation of transcription elongation, DNA-dependent;negative regulation of transcription elongation…	nucleus	enzyme binding;protein heterodimerization activity	518984	21784.1
Creg1	false	false	true	regulation of transcription, DNA-dependent;regulation of growth;oxidation-reduction process	extracellular region;transcription factor complex	transcription factor binding;FMN binding;oxidoreductase activity	249735	21669
Creg1	false	false	false	regulation of transcription, DNA-dependent;regulation of growth;oxidation-reduction process	extracellular region;transcription factor complex	transcription factor binding;FMN binding;oxidoreductase activity	249735	21669
Creg1	false	true	false	regulation of transcription, DNA-dependent;regulation of growth;oxidation-reduction process	extracellular region;transcription factor complex	transcription factor binding;FMN binding;oxidoreductase activity	249735	21669
Lmo4	false	false	false	neural tube closure;ventricular septum development;transcription, DNA-dependent;regulation of transcription, DNA-dependent;transcription from RNA polymerase II promoter;ventral spinal cord interneuron differentiation;spinal cord motor neuron differentiation;spinal cord association neuron differentiation;negative regulation of protein complex assembly;regulation of cell fate specification;positive…	transcription factor complex	enhancer sequence-specific DNA binding;protein binding;transcription factor binding;zinc ion binding;metal ion binding	358367	21425.8
Lmo4	false	false	true	neural tube closure;ventricular septum development;transcription, DNA-dependent;regulation of transcription, DNA-dependent;transcription from RNA polymerase II promoter;ventral spinal cord interneuron differentiation;spinal cord motor neuron differentiation;spinal cord association neuron differentiation;negative regulation of protein complex assembly;regulation of cell fate specification;positive…	transcription factor complex	enhancer sequence-specific DNA binding;protein binding;transcription factor binding;zinc ion binding;metal ion binding	358367	21425.8
Lmo4	false	false	true	neural tube closure;ventricular septum development;transcription, DNA-dependent;regulation of transcription, DNA-dependent;transcription from RNA polymerase II promoter;ventral spinal cord interneuron differentiation;spinal cord motor neuron differentiation;spinal cord association neuron differentiation;negative regulation of protein complex assembly;regulation of cell fate specification;positive…	transcription factor complex	enhancer sequence-specific DNA binding;protein binding;transcription factor binding;zinc ion binding;metal ion binding	358367	21425.8
Lmo4	true	false	false	neural tube closure;ventricular septum development;transcription, DNA-dependent;regulation of transcription, DNA-dependent;transcription from RNA polymerase II promoter;ventral spinal cord interneuron differentiation;spinal cord motor neuron differentiation;spinal cord association neuron differentiation;negative regulation of protein complex assembly;regulation of cell fate specification;positive…	transcription factor complex	enhancer sequence-specific DNA binding;protein binding;transcription factor binding;zinc ion binding;metal ion binding	358367	21425.8
Hdac5	false	true	false	negative regulation of transcription from RNA polymerase II promoter;osteoblast development;response to stress;heart development;metabolic process;negative regulation of myotube differentiation;histone deacetylation;response to cocaine;regulation of protein binding;negative regulation of osteoblast differentiation;negative regulation of transcription, DNA-dependent;positive regulation of transcri…	nucleus;cytoplasm;Golgi apparatus;cytosol;nuclear body	transcription corepressor activity;histone deacetylase activity;protein kinase C binding;protein binding;transcription factor binding;hydrolase activity;repressing transcription factor binding	736497	21393.6
Onecut2	false	true	false	liver development;regulation of cell-matrix adhesion;epithelial cell development;transcription, DNA-dependent;regulation of transcription, DNA-dependent;anatomical structure morphogenesis;positive regulation of cell migration;negative regulation of transforming growth factor beta receptor signaling pathway;pancreas development;endocrine pancreas development;cilium assembly;cell fate commitment;po…	nucleus	DNA binding;sequence-specific DNA binding transcription factor activity;sequence-specific DNA binding	1.23394e+06	21229.1
Onecut2	false	false	true	liver development;regulation of cell-matrix adhesion;epithelial cell development;transcription, DNA-dependent;regulation of transcription, DNA-dependent;anatomical structure morphogenesis;positive regulation of cell migration;negative regulation of transforming growth factor beta receptor signaling pathway;pancreas development;endocrine pancreas development;cilium assembly;cell fate commitment;po…	nucleus	DNA binding;sequence-specific DNA binding transcription factor activity;sequence-specific DNA binding	1.23394e+06	21229.1
Nr1h4	false	false	true	negative regulation of transcription from RNA polymerase II promoter;regulation of carbohydrate metabolic process;transcription, DNA-dependent;regulation of transcription, DNA-dependent;regulation of transcription from RNA polymerase II promoter;bile acid metabolic process;intracellular receptor mediated signaling pathway;steroid hormone mediated signaling pathway;positive regulation of transcrip…	nucleus	DNA binding;double-stranded DNA binding;sequence-specific DNA binding transcription factor activity;steroid hormone receptor activity;receptor activity;thyroid hormone receptor activity;zinc ion binding;bile acid binding;peptide binding;sequence-specific DNA binding;metal ion binding;retinoid X receptor binding	1.67155e+06	21055.2
Nr1h4	false	false	true	negative regulation of transcription from RNA polymerase II promoter;regulation of carbohydrate metabolic process;transcription, DNA-dependent;regulation of transcription, DNA-dependent;regulation of transcription from RNA polymerase II promoter;bile acid metabolic process;intracellular receptor mediated signaling pathway;steroid hormone mediated signaling pathway;positive regulation of transcrip…	nucleus	DNA binding;double-stranded DNA binding;sequence-specific DNA binding transcription factor activity;steroid hormone receptor activity;receptor activity;thyroid hormone receptor activity;zinc ion binding;bile acid binding;peptide binding;sequence-specific DNA binding;metal ion binding;retinoid X receptor binding	1.67155e+06	21055.2
Nr1h4	false	false	true	negative regulation of transcription from RNA polymerase II promoter;regulation of carbohydrate metabolic process;transcription, DNA-dependent;regulation of transcription, DNA-dependent;regulation of transcription from RNA polymerase II promoter;bile acid metabolic process;intracellular receptor mediated signaling pathway;steroid hormone mediated signaling pathway;positive regulation of transcrip…	nucleus	DNA binding;double-stranded DNA binding;sequence-specific DNA binding transcription factor activity;steroid hormone receptor activity;receptor activity;thyroid hormone receptor activity;zinc ion binding;bile acid binding;peptide binding;sequence-specific DNA binding;metal ion binding;retinoid X receptor binding	1.67155e+06	21055.2
Nr1h4	false	false	true	negative regulation of transcription from RNA polymerase II promoter;regulation of carbohydrate metabolic process;transcription, DNA-dependent;regulation of transcription, DNA-dependent;regulation of transcription from RNA polymerase II promoter;bile acid metabolic process;intracellular receptor mediated signaling pathway;steroid hormone mediated signaling pathway;positive regulation of transcrip…	nucleus	DNA binding;double-stranded DNA binding;sequence-specific DNA binding transcription factor activity;steroid hormone receptor activity;receptor activity;thyroid hormone receptor activity;zinc ion binding;bile acid binding;peptide binding;sequence-specific DNA binding;metal ion binding;retinoid X receptor binding	1.67155e+06	21055.2
Nr1h4	false	false	true	negative regulation of transcription from RNA polymerase II promoter;regulation of carbohydrate metabolic process;transcription, DNA-dependent;regulation of transcription, DNA-dependent;regulation of transcription from RNA polymerase II promoter;bile acid metabolic process;intracellular receptor mediated signaling pathway;steroid hormone mediated signaling pathway;positive regulation of transcrip…	nucleus	DNA binding;double-stranded DNA binding;sequence-specific DNA binding transcription factor activity;steroid hormone receptor activity;receptor activity;thyroid hormone receptor activity;zinc ion binding;bile acid binding;peptide binding;sequence-specific DNA binding;metal ion binding;retinoid X receptor binding	1.67155e+06	21055.2
Nr1h4	false	false	false	negative regulation of transcription from RNA polymerase II promoter;regulation of carbohydrate metabolic process;transcription, DNA-dependent;regulation of transcription, DNA-dependent;regulation of transcription from RNA polymerase II promoter;bile acid metabolic process;intracellular receptor mediated signaling pathway;steroid hormone mediated signaling pathway;positive regulation of transcrip…	nucleus	DNA binding;double-stranded DNA binding;sequence-specific DNA binding transcription factor activity;steroid hormone receptor activity;receptor activity;thyroid hormone receptor activity;zinc ion binding;bile acid binding;peptide binding;sequence-specific DNA binding;metal ion binding;retinoid X receptor binding	1.67155e+06	21055.2
Hdgf	false	true	false	transcription, DNA-dependent;regulation of transcription, DNA-dependent;cellular process	extracellular space;nucleus;cytoplasm	nucleotide binding;DNA binding;growth factor activity;heparin binding	203064	20695.5
Mzf1	false	true	false	transcription, DNA-dependent;regulation of transcription, DNA-dependent	nucleus	protein homodimerization activity;transcription regulatory region DNA binding;metal ion binding	253845	20369.5
Mzf1	true	false	false	transcription, DNA-dependent;regulation of transcription, DNA-dependent	nucleus	protein homodimerization activity;transcription regulatory region DNA binding;metal ion binding	253845	20369.5
Rorc	false	true	false	transcription, DNA-dependent;regulation of transcription, DNA-dependent;regulation of transcription from RNA polymerase II promoter;protein phosphorylation;multicellular organismal development;cell differentiation;T cell differentiation in thymus;steroid hormone mediated signaling pathway;alpha-beta T cell differentiation;lymph node development;mucosal-associated lymphoid tissue development;T-hel…	nucleus	DNA binding;sequence-specific DNA binding transcription factor activity;steroid hormone receptor activity;receptor activity;ligand-activated sequence-specific DNA binding RNA polymerase II transcription factor activity;zinc ion binding;sequence-specific DNA binding;metal ion binding	515425	20281.1
Rorc	true	false	false	transcription, DNA-dependent;regulation of transcription, DNA-dependent;regulation of transcription from RNA polymerase II promoter;protein phosphorylation;multicellular organismal development;cell differentiation;T cell differentiation in thymus;steroid hormone mediated signaling pathway;alpha-beta T cell differentiation;lymph node development;mucosal-associated lymphoid tissue development;T-hel…	nucleus	DNA binding;sequence-specific DNA binding transcription factor activity;steroid hormone receptor activity;receptor activity;ligand-activated sequence-specific DNA binding RNA polymerase II transcription factor activity;zinc ion binding;sequence-specific DNA binding;metal ion binding	515425	20281.1
Kdm4a	true	false	false	transcription, DNA-dependent;regulation of transcription, DNA-dependent;chromatin modification;histone demethylation;negative regulation of transcription, DNA-dependent;oxidation-reduction process;histone H3-K36 demethylation	nucleus;nucleolus;cytoplasm;centrosome	zinc ion binding;oxidoreductase activity;oxidoreductase activity, acting on single donors with incorporation of molecular oxygen, incorporation of two atoms of oxygen;metal ion binding;histone demethylase activity (H3-K36 specific)	856913	19909.7
Kdm4a	true	false	false	transcription, DNA-dependent;regulation of transcription, DNA-dependent;chromatin modification;histone demethylation;negative regulation of transcription, DNA-dependent;oxidation-reduction process;histone H3-K36 demethylation	nucleus;nucleolus;cytoplasm;centrosome	zinc ion binding;oxidoreductase activity;oxidoreductase activity, acting on single donors with incorporation of molecular oxygen, incorporation of two atoms of oxygen;metal ion binding;histone demethylase activity (H3-K36 specific)	856913	19909.7
Bhlhe41	true	false	false	negative regulation of transcription from RNA polymerase II promoter;transcription, DNA-dependent;regulation of transcription, DNA-dependent;entrainment of circadian clock;negative regulation of myotube differentiation;negative regulation of transcription by competitive promoter binding	nucleus;transcriptional repressor complex	RNA polymerase II core promoter proximal region sequence-specific DNA binding;RNA polymerase II core promoter proximal region sequence-specific DNA binding transcription factor activity involved in negative regulation of transcription;RNA polymerase II activating transcription factor binding;RNA polymerase II transcription factor binding transcription factor activity involved in negative regulati…	51830.6	19904.2
Bhlhe41	false	true	false	negative regulation of transcription from RNA polymerase II promoter;transcription, DNA-dependent;regulation of transcription, DNA-dependent;entrainment of circadian clock;negative regulation of myotube differentiation;negative regulation of transcription by competitive promoter binding	nucleus;transcriptional repressor complex	RNA polymerase II core promoter proximal region sequence-specific DNA binding;RNA polymerase II core promoter proximal region sequence-specific DNA binding transcription factor activity involved in negative regulation of transcription;RNA polymerase II activating transcription factor binding;RNA polymerase II transcription factor binding transcription factor activity involved in negative regulati…	51830.6	19904.2
Rbm39	true	false	false	transcription, DNA-dependent;regulation of transcription, DNA-dependent;mRNA processing;RNA splicing;regulation of RNA biosynthetic process	nucleus;centrosome;microtubule cytoskeleton	nucleotide binding;nucleic acid binding;transcription coactivator activity;RNA binding;protein binding	655636	19866.6
Deaf1	true	false	false	neural tube closure;transcription, DNA-dependent;regulation of transcription, DNA-dependent;regulation of transcription from RNA polymerase II promoter;transcription from RNA polymerase II promoter;multicellular organismal development;nervous system development;regulation of mammary gland epithelial cell proliferation;positive regulation of transcription from RNA polymerase II promoter;embryonic …	nucleus;transcription factor complex;cytoplasm	DNA binding;binding;zinc ion binding;metal ion binding	818143	19663.1
Deaf1	false	true	false	neural tube closure;transcription, DNA-dependent;regulation of transcription, DNA-dependent;regulation of transcription from RNA polymerase II promoter;transcription from RNA polymerase II promoter;multicellular organismal development;nervous system development;regulation of mammary gland epithelial cell proliferation;positive regulation of transcription from RNA polymerase II promoter;embryonic …	nucleus;transcription factor complex;cytoplasm	DNA binding;binding;zinc ion binding;metal ion binding	818143	19663.1
Nfe2	true	false	false	transcription, DNA-dependent;regulation of transcription, DNA-dependent;cell-cell signaling;negative regulation of bone mineralization	nucleus;cytoplasm;actin cytoskeleton	DNA binding;sequence-specific DNA binding transcription factor activity;sequence-specific DNA binding;protein dimerization activity;protein N-terminus binding;WW domain binding	141504	19656.1
Hopx	false	false	true	negative regulation of transcription from RNA polymerase II promoter;trophectodermal cell differentiation;transcription, DNA-dependent;regulation of transcription, DNA-dependent;multicellular organismal development;heart development;regulation of heart contraction;histone deacetylation;positive regulation of skeletal muscle tissue regeneration;negative regulation of cell differentiation;lung alve…	nucleus;cytoplasm	DNA binding;sequence-specific DNA binding transcription factor activity;protein binding;sequence-specific DNA binding	549457	19527.2
Hopx	false	false	true	negative regulation of transcription from RNA polymerase II promoter;trophectodermal cell differentiation;transcription, DNA-dependent;regulation of transcription, DNA-dependent;multicellular organismal development;heart development;regulation of heart contraction;histone deacetylation;positive regulation of skeletal muscle tissue regeneration;negative regulation of cell differentiation;lung alve…	nucleus;cytoplasm	DNA binding;sequence-specific DNA binding transcription factor activity;protein binding;sequence-specific DNA binding	549457	19527.2
Hopx	false	false	true	negative regulation of transcription from RNA polymerase II promoter;trophectodermal cell differentiation;transcription, DNA-dependent;regulation of transcription, DNA-dependent;multicellular organismal development;heart development;regulation of heart contraction;histone deacetylation;positive regulation of skeletal muscle tissue regeneration;negative regulation of cell differentiation;lung alve…	nucleus;cytoplasm	DNA binding;sequence-specific DNA binding transcription factor activity;protein binding;sequence-specific DNA binding	549457	19527.2
Hopx	false	false	true	negative regulation of transcription from RNA polymerase II promoter;trophectodermal cell differentiation;transcription, DNA-dependent;regulation of transcription, DNA-dependent;multicellular organismal development;heart development;regulation of heart contraction;histone deacetylation;positive regulation of skeletal muscle tissue regeneration;negative regulation of cell differentiation;lung alve…	nucleus;cytoplasm	DNA binding;sequence-specific DNA binding transcription factor activity;protein binding;sequence-specific DNA binding	549457	19527.2
Sap30	false	false	true	negative regulation of transcription from RNA polymerase II promoter;transcription, DNA-dependent;regulation of transcription, DNA-dependent	histone deacetylase complex;nucleus;Sin3 complex	DNA binding;transcription corepressor activity;protein binding;metal ion binding	100589	19497.7
Lyl1	true	false	false	blood vessel maturation;transcription, DNA-dependent;regulation of transcription, DNA-dependent;B cell differentiation;positive regulation of transcription, DNA-dependent;definitive hemopoiesis	nucleus	DNA binding	62585.6	19198
Mynn	true	false	false	transcription, DNA-dependent;regulation of transcription, DNA-dependent	intracellular;nucleus	nucleic acid binding;DNA binding;zinc ion binding;metal ion binding	313871	19129.2
Thap1	false	false	true	endothelial cell proliferation;transcription, DNA-dependent;regulation of transcription, DNA-dependent;cell cycle;regulation of mitotic cell cycle	nucleus	nucleic acid binding;DNA binding;zinc ion binding;sequence-specific DNA binding;metal ion binding	114151	19079.2
Rarg	true	false	false	negative regulation of transcription from RNA polymerase II promoter;chondrocyte development;growth plate cartilage development;growth plate cartilage chondrocyte growth;transcription, DNA-dependent;regulation of transcription, DNA-dependent;regulation of transcription from RNA polymerase II promoter;negative regulation of cell proliferation;anterior/posterior pattern specification;regulation of …	nucleus;transcription factor complex	DNA binding;sequence-specific DNA binding transcription factor activity;steroid hormone receptor activity;retinoic acid receptor activity;receptor activity;protein binding;zinc ion binding;sequence-specific DNA binding;metal ion binding;retinoid X receptor binding	419686	18616.3
Ncor2	true	false	false	negative regulation of transcription from RNA polymerase II promoter;in utero embryonic development;heart morphogenesis;transcription, DNA-dependent;regulation of transcription, DNA-dependent;telencephalon development;cell proliferation in forebrain;forebrain development;glucose homeostasis;negative regulation of fat cell differentiation;negative regulation of transcription, DNA-dependent;white f…	histone deacetylase complex;chromatin;nucleus;nuclear body;transcriptional repressor complex	DNA binding;chromatin binding;transcription corepressor activity;Notch binding;protein binding;histone deacetylase binding;sequence-specific DNA binding;protein N-terminus binding	2.97199e+06	18338.8
Ncor2	true	false	false	negative regulation of transcription from RNA polymerase II promoter;in utero embryonic development;heart morphogenesis;transcription, DNA-dependent;regulation of transcription, DNA-dependent;telencephalon development;cell proliferation in forebrain;forebrain development;glucose homeostasis;negative regulation of fat cell differentiation;negative regulation of transcription, DNA-dependent;white f…	histone deacetylase complex;chromatin;nucleus;nuclear body;transcriptional repressor complex	DNA binding;chromatin binding;transcription corepressor activity;Notch binding;protein binding;histone deacetylase binding;sequence-specific DNA binding;protein N-terminus binding	2.97199e+06	18338.8
Ncor2	true	false	false	negative regulation of transcription from RNA polymerase II promoter;in utero embryonic development;heart morphogenesis;transcription, DNA-dependent;regulation of transcription, DNA-dependent;telencephalon development;cell proliferation in forebrain;forebrain development;glucose homeostasis;negative regulation of fat cell differentiation;negative regulation of transcription, DNA-dependent;white f…	histone deacetylase complex;chromatin;nucleus;nuclear body;transcriptional repressor complex	DNA binding;chromatin binding;transcription corepressor activity;Notch binding;protein binding;histone deacetylase binding;sequence-specific DNA binding;protein N-terminus binding	2.97199e+06	18338.8
Ncor2	true	false	false	negative regulation of transcription from RNA polymerase II promoter;in utero embryonic development;heart morphogenesis;transcription, DNA-dependent;regulation of transcription, DNA-dependent;telencephalon development;cell proliferation in forebrain;forebrain development;glucose homeostasis;negative regulation of fat cell differentiation;negative regulation of transcription, DNA-dependent;white f…	histone deacetylase complex;chromatin;nucleus;nuclear body;transcriptional repressor complex	DNA binding;chromatin binding;transcription corepressor activity;Notch binding;protein binding;histone deacetylase binding;sequence-specific DNA binding;protein N-terminus binding	2.97199e+06	18338.8
Ncor2	true	false	false	negative regulation of transcription from RNA polymerase II promoter;in utero embryonic development;heart morphogenesis;transcription, DNA-dependent;regulation of transcription, DNA-dependent;telencephalon development;cell proliferation in forebrain;forebrain development;glucose homeostasis;negative regulation of fat cell differentiation;negative regulation of transcription, DNA-dependent;white f…	histone deacetylase complex;chromatin;nucleus;nuclear body;transcriptional repressor complex	DNA binding;chromatin binding;transcription corepressor activity;Notch binding;protein binding;histone deacetylase binding;sequence-specific DNA binding;protein N-terminus binding	2.97199e+06	18338.8
Ncor2	true	false	false	negative regulation of transcription from RNA polymerase II promoter;in utero embryonic development;heart morphogenesis;transcription, DNA-dependent;regulation of transcription, DNA-dependent;telencephalon development;cell proliferation in forebrain;forebrain development;glucose homeostasis;negative regulation of fat cell differentiation;negative regulation of transcription, DNA-dependent;white f…	histone deacetylase complex;chromatin;nucleus;nuclear body;transcriptional repressor complex	DNA binding;chromatin binding;transcription corepressor activity;Notch binding;protein binding;histone deacetylase binding;sequence-specific DNA binding;protein N-terminus binding	2.97199e+06	18338.8
Ncor2	true	false	false	negative regulation of transcription from RNA polymerase II promoter;in utero embryonic development;heart morphogenesis;transcription, DNA-dependent;regulation of transcription, DNA-dependent;telencephalon development;cell proliferation in forebrain;forebrain development;glucose homeostasis;negative regulation of fat cell differentiation;negative regulation of transcription, DNA-dependent;white f…	histone deacetylase complex;chromatin;nucleus;nuclear body;transcriptional repressor complex	DNA binding;chromatin binding;transcription corepressor activity;Notch binding;protein binding;histone deacetylase binding;sequence-specific DNA binding;protein N-terminus binding	2.97199e+06	18338.8
Zfp746	false	false	true	transcription, DNA-dependent;regulation of transcription, DNA-dependent;regulation of cell death;negative regulation of transcription, DNA-dependent;neuron death	intracellular;nucleus;cytoplasm	nucleic acid binding;DNA binding;protein binding;zinc ion binding;ubiquitin protein ligase binding;transcription regulatory region DNA binding;metal ion binding	441939	18262.7
Maff	false	true	false	in utero embryonic development;transcription, DNA-dependent;regulation of transcription, DNA-dependent;regulation of epidermal cell differentiation	nucleus	DNA binding;sequence-specific DNA binding transcription factor activity;sequence-specific DNA binding	207152	18172.8
Tcf3	false	false	false	G1 phase of mitotic cell cycle;natural killer cell differentiation;B cell lineage commitment;transcription, DNA-dependent;regulation of transcription, DNA-dependent;regulation of transcription from RNA polymerase II promoter;nervous system development;positive regulation of gene expression;lymphocyte differentiation;cell differentiation;positive regulation of B cell proliferation;response to lipo…	nuclear nucleosome;nucleus;transcription factor complex;cytoplasm;protein complex	DNA binding;chromatin binding;sequence-specific DNA binding transcription factor activity;transcription coactivator activity;protein binding;transcription factor binding;PDZ domain binding;mitogen-activated protein kinase kinase kinase binding;protein homodimerization activity;bHLH transcription factor binding;sequence-specific DNA binding;protein heterodimerization activity;repressing transcript…	444836	18164.7
Tcf3	false	false	false	G1 phase of mitotic cell cycle;natural killer cell differentiation;B cell lineage commitment;transcription, DNA-dependent;regulation of transcription, DNA-dependent;regulation of transcription from RNA polymerase II promoter;nervous system development;positive regulation of gene expression;lymphocyte differentiation;cell differentiation;positive regulation of B cell proliferation;response to lipo…	nuclear nucleosome;nucleus;transcription factor complex;cytoplasm;protein complex	DNA binding;chromatin binding;sequence-specific DNA binding transcription factor activity;transcription coactivator activity;protein binding;transcription factor binding;PDZ domain binding;mitogen-activated protein kinase kinase kinase binding;protein homodimerization activity;bHLH transcription factor binding;sequence-specific DNA binding;protein heterodimerization activity;repressing transcript…	444836	18164.7
Zkscan1	false	false	true	transcription, DNA-dependent;regulation of transcription, DNA-dependent;biological_process;viral reproduction	intracellular;nucleus;mitochondrion	molecular_function;nucleic acid binding;DNA binding;sequence-specific DNA binding transcription factor activity;zinc ion binding;metal ion binding	410813	18066.4
Zkscan1	false	false	true	transcription, DNA-dependent;regulation of transcription, DNA-dependent;biological_process;viral reproduction	intracellular;nucleus;mitochondrion	molecular_function;nucleic acid binding;DNA binding;sequence-specific DNA binding transcription factor activity;zinc ion binding;metal ion binding	410813	18066.4
Zkscan1	false	false	true	transcription, DNA-dependent;regulation of transcription, DNA-dependent;biological_process;viral reproduction	intracellular;nucleus;mitochondrion	molecular_function;nucleic acid binding;DNA binding;sequence-specific DNA binding transcription factor activity;zinc ion binding;metal ion binding	410813	18066.4
Bach1	true	false	false	regulation of transcription involved in G1/S phase of mitotic cell cycle;regulation of transcription involved in G2/M-phase of mitotic cell cycle;negative regulation of transcription from RNA polymerase II promoter;transcription, DNA-dependent;regulation of transcription, DNA-dependent;regulation of transcription from RNA polymerase II promoter in response to stress	nucleus	RNA polymerase II core promoter proximal region sequence-specific DNA binding transcription factor activity involved in negative regulation of transcription;DNA binding;sequence-specific DNA binding transcription factor activity;protein binding;sequence-specific DNA binding;protein dimerization activity	618047	17970.1
Maf	false	false	true	negative regulation of transcription from RNA polymerase II promoter;cytokine production;lens development in camera-type eye;transcription, DNA-dependent;regulation of transcription, DNA-dependent;transcription from RNA polymerase II promoter;positive regulation of gene expression;regulation of chondrocyte differentiation;positive regulation of transcription from RNA polymerase II promoter;cell d…	nucleus;cytoplasm	sequence-specific DNA binding RNA polymerase II transcription factor activity;DNA binding;double-stranded DNA binding;sequence-specific DNA binding transcription factor activity;protein binding;protein homodimerization activity;sequence-specific DNA binding;protein heterodimerization activity	64603.8	17738.5
Maf	true	false	false	negative regulation of transcription from RNA polymerase II promoter;cytokine production;lens development in camera-type eye;transcription, DNA-dependent;regulation of transcription, DNA-dependent;transcription from RNA polymerase II promoter;positive regulation of gene expression;regulation of chondrocyte differentiation;positive regulation of transcription from RNA polymerase II promoter;cell d…	nucleus;cytoplasm	sequence-specific DNA binding RNA polymerase II transcription factor activity;DNA binding;double-stranded DNA binding;sequence-specific DNA binding transcription factor activity;protein binding;protein homodimerization activity;sequence-specific DNA binding;protein heterodimerization activity	64603.8	17738.5
Maf	false	true	false	negative regulation of transcription from RNA polymerase II promoter;cytokine production;lens development in camera-type eye;transcription, DNA-dependent;regulation of transcription, DNA-dependent;transcription from RNA polymerase II promoter;positive regulation of gene expression;regulation of chondrocyte differentiation;positive regulation of transcription from RNA polymerase II promoter;cell d…	nucleus;cytoplasm	sequence-specific DNA binding RNA polymerase II transcription factor activity;DNA binding;double-stranded DNA binding;sequence-specific DNA binding transcription factor activity;protein binding;protein homodimerization activity;sequence-specific DNA binding;protein heterodimerization activity	64603.8	17738.5
Maf	false	true	false	negative regulation of transcription from RNA polymerase II promoter;cytokine production;lens development in camera-type eye;transcription, DNA-dependent;regulation of transcription, DNA-dependent;transcription from RNA polymerase II promoter;positive regulation of gene expression;regulation of chondrocyte differentiation;positive regulation of transcription from RNA polymerase II promoter;cell d…	nucleus;cytoplasm	sequence-specific DNA binding RNA polymerase II transcription factor activity;DNA binding;double-stranded DNA binding;sequence-specific DNA binding transcription factor activity;protein binding;protein homodimerization activity;sequence-specific DNA binding;protein heterodimerization activity	64603.8	17738.5
Maf	false	false	true	negative regulation of transcription from RNA polymerase II promoter;cytokine production;lens development in camera-type eye;transcription, DNA-dependent;regulation of transcription, DNA-dependent;transcription from RNA polymerase II promoter;positive regulation of gene expression;regulation of chondrocyte differentiation;positive regulation of transcription from RNA polymerase II promoter;cell d…	nucleus;cytoplasm	sequence-specific DNA binding RNA polymerase II transcription factor activity;DNA binding;double-stranded DNA binding;sequence-specific DNA binding transcription factor activity;protein binding;protein homodimerization activity;sequence-specific DNA binding;protein heterodimerization activity	64603.8	17738.5
Elk4	false	false	true	regulation of transcription, DNA-dependent	nucleus;cytoplasm	DNA binding;sequence-specific DNA binding transcription factor activity;sequence-specific DNA binding	320510	17727.3
Elk4	false	false	true	regulation of transcription, DNA-dependent	nucleus;cytoplasm	DNA binding;sequence-specific DNA binding transcription factor activity;sequence-specific DNA binding	320510	17727.3
Gtf2f1	true	false	false	transcription, DNA-dependent;regulation of transcription, DNA-dependent;transcription initiation from RNA polymerase II promoter;positive regulation of transcription, DNA-dependent;positive regulation of transcription from RNA polymerase II promoter	nucleus;cell junction	DNA binding;catalytic activity;protein binding;transcription factor binding;phosphatase activator activity	139390	17673.4
Rbak	true	false	false	transcription, DNA-dependent;regulation of transcription, DNA-dependent	intracellular;nucleus	nucleic acid binding;zinc ion binding;metal ion binding	149559	17482
Arid5b	false	false	true	kidney development;transcription, DNA-dependent;regulation of transcription, DNA-dependent;nitrogen compound metabolic process;male gonad development;female gonad development;post-embryonic development;fibroblast migration;adrenal gland development;multicellular organism growth;fat cell differentiation;platelet-derived growth factor receptor signaling pathway;cell development;muscle organ morphog…	intracellular;nucleus	DNA binding;transcription regulatory region DNA binding	3.18718e+06	17403.5
Arid5b	true	false	false	kidney development;transcription, DNA-dependent;regulation of transcription, DNA-dependent;nitrogen compound metabolic process;male gonad development;female gonad development;post-embryonic development;fibroblast migration;adrenal gland development;multicellular organism growth;fat cell differentiation;platelet-derived growth factor receptor signaling pathway;cell development;muscle organ morphog…	intracellular;nucleus	DNA binding;transcription regulatory region DNA binding	3.18718e+06	17403.5
Arid5b	false	false	true	kidney development;transcription, DNA-dependent;regulation of transcription, DNA-dependent;nitrogen compound metabolic process;male gonad development;female gonad development;post-embryonic development;fibroblast migration;adrenal gland development;multicellular organism growth;fat cell differentiation;platelet-derived growth factor receptor signaling pathway;cell development;muscle organ morphog…	intracellular;nucleus	DNA binding;transcription regulatory region DNA binding	3.18718e+06	17403.5
Arid5b	false	true	false	kidney development;transcription, DNA-dependent;regulation of transcription, DNA-dependent;nitrogen compound metabolic process;male gonad development;female gonad development;post-embryonic development;fibroblast migration;adrenal gland development;multicellular organism growth;fat cell differentiation;platelet-derived growth factor receptor signaling pathway;cell development;muscle organ morphog…	intracellular;nucleus	DNA binding;transcription regulatory region DNA binding	3.18718e+06	17403.5
Arid5b	false	true	false	kidney development;transcription, DNA-dependent;regulation of transcription, DNA-dependent;nitrogen compound metabolic process;male gonad development;female gonad development;post-embryonic development;fibroblast migration;adrenal gland development;multicellular organism growth;fat cell differentiation;platelet-derived growth factor receptor signaling pathway;cell development;muscle organ morphog…	intracellular;nucleus	DNA binding;transcription regulatory region DNA binding	3.18718e+06	17403.5
Arid5b	false	true	false	kidney development;transcription, DNA-dependent;regulation of transcription, DNA-dependent;nitrogen compound metabolic process;male gonad development;female gonad development;post-embryonic development;fibroblast migration;adrenal gland development;multicellular organism growth;fat cell differentiation;platelet-derived growth factor receptor signaling pathway;cell development;muscle organ morphog…	intracellular;nucleus	DNA binding;transcription regulatory region DNA binding	3.18718e+06	17403.5
Arid5b	false	false	false	kidney development;transcription, DNA-dependent;regulation of transcription, DNA-dependent;nitrogen compound metabolic process;male gonad development;female gonad development;post-embryonic development;fibroblast migration;adrenal gland development;multicellular organism growth;fat cell differentiation;platelet-derived growth factor receptor signaling pathway;cell development;muscle organ morphog…	intracellular;nucleus	DNA binding;transcription regulatory region DNA binding	3.18718e+06	17403.5
Phf17	false	false	false	transcription, DNA-dependent;regulation of transcription, DNA-dependent;apoptotic process;histone H3 acetylation;histone H4-K5 acetylation;histone H4-K8 acetylation;histone H4-K12 acetylation	histone acetyltransferase complex;nucleus;cytoplasm;mitochondrion	molecular_function;zinc ion binding;metal ion binding	1.05687e+06	17288.7
Phf17	false	true	false	transcription, DNA-dependent;regulation of transcription, DNA-dependent;apoptotic process;histone H3 acetylation;histone H4-K5 acetylation;histone H4-K8 acetylation;histone H4-K12 acetylation	histone acetyltransferase complex;nucleus;cytoplasm;mitochondrion	molecular_function;zinc ion binding;metal ion binding	1.05687e+06	17288.7
Phf17	true	false	false	transcription, DNA-dependent;regulation of transcription, DNA-dependent;apoptotic process;histone H3 acetylation;histone H4-K5 acetylation;histone H4-K8 acetylation;histone H4-K12 acetylation	histone acetyltransferase complex;nucleus;cytoplasm;mitochondrion	molecular_function;zinc ion binding;metal ion binding	1.05687e+06	17288.7
Tcf25	true	false	false	negative regulation of transcription from RNA polymerase II promoter;transcription, DNA-dependent;regulation of transcription, DNA-dependent	nucleus;cytoplasm;mitochondrion	DNA binding;sequence-specific DNA binding transcription factor activity;binding	523394	17251.5
Irf5	true	false	false	transcription, DNA-dependent;regulation of transcription, DNA-dependent	nucleus	regulatory region DNA binding;DNA binding;sequence-specific DNA binding transcription factor activity	182106	17200.9
Setd8	true	false	false	negative regulation of transcription from RNA polymerase II promoter;transcription, DNA-dependent;regulation of transcription, DNA-dependent;cell cycle;mitosis;chromatin modification;peptidyl-lysine monomethylation;methylation;histone lysine methylation;regulation of DNA damage response, signal transduction by p53 class mediator;negative regulation of transcription, DNA-dependent;cell division	nucleus;chromosome	p53 binding;transcription corepressor activity;methyltransferase activity;protein-lysine N-methyltransferase activity;transferase activity;histone-lysine N-methyltransferase activity	383548	17139.5
Tspyl2	true	false	false	nucleosome assembly;transcription, DNA-dependent;regulation of transcription, DNA-dependent;cell cycle;negative regulation of DNA replication;chromatin modification;negative regulation of cell growth;regulation of protein kinase activity	nucleus;nucleolus;cytoplasm;centrosome;plasma membrane		96525.1	17135.6
Sox9	false	false	false	skeletal system development;cartilage condensation;cell fate specification;epithelial to mesenchymal transition;tissue homeostasis;positive regulation of protein phosphorylation;hair follicle development;positive regulation of mesenchymal cell proliferation;chondrocyte development;negative regulation of immune system process;heart valve development;heart valve morphogenesis;heart valve formation;…	intracellular;nucleus;chromatin remodeling complex;protein complex	transcription regulatory region sequence-specific DNA binding;core promoter sequence-specific DNA binding;RNA polymerase II core promoter proximal region sequence-specific DNA binding transcription factor activity involved in positive regulation of transcription;enhancer sequence-specific DNA binding;DNA binding;chromatin binding;sequence-specific DNA binding transcription factor activity;sequenc…	93675.8	16884.6
Tfpt	false	false	false	DNA repair;DNA recombination;transcription, DNA-dependent;regulation of transcription, DNA-dependent;apoptotic process;induction of apoptosis;response to DNA damage stimulus	nucleus;cytoplasm;actin filament;Ino80 complex	DNA binding;protein kinase binding;protein heterodimerization activity	161050	16844.5
Zfp740	false	false	false	transcription, DNA-dependent;regulation of transcription, DNA-dependent;biological_process	cellular_component;intracellular;nucleus	molecular_function;nucleic acid binding;zinc ion binding;metal ion binding	122460	16695.3
Zfp740	false	true	false	transcription, DNA-dependent;regulation of transcription, DNA-dependent;biological_process	cellular_component;intracellular;nucleus	molecular_function;nucleic acid binding;zinc ion binding;metal ion binding	122460	16695.3
Olig1	true	false	false	transcription, DNA-dependent;regulation of transcription, DNA-dependent;multicellular organismal development;neuron fate commitment	nucleus;transcription factor complex	DNA binding;sequence-specific DNA binding transcription factor activity;protein binding	35598.6	16397.3
Olig1	false	false	false	transcription, DNA-dependent;regulation of transcription, DNA-dependent;multicellular organismal development;neuron fate commitment	nucleus;transcription factor complex	DNA binding;sequence-specific DNA binding transcription factor activity;protein binding	35598.6	16397.3
Fos	false	false	true	regulation of transcription, DNA-dependent;transcription from RNA polymerase II promoter;transforming growth factor beta receptor signaling pathway;nervous system development;cellular response to extracellular stimulus;cellular response to reactive oxygen species;response to drug;positive regulation of transcription, DNA-dependent;positive regulation of transcription from RNA polymerase II promot…	membrane fraction;nucleus;transcription factor complex;synaptosome	DNA binding;double-stranded DNA binding;sequence-specific DNA binding transcription factor activity;protein binding;transcription factor binding;sequence-specific DNA binding;transcription regulatory region DNA binding;protein heterodimerization activity;protein dimerization activity;R-SMAD binding	55225	16392.1
Gtf2i	true	false	false	transcription, DNA-dependent;regulation of transcription, DNA-dependent;embryo development;negative regulation of angiogenesis;reduction of cytosolic calcium ion concentration	nucleus;cytoplasm;cytosol;cell projection;neuronal cell body	DNA binding;mitogen-activated protein kinase binding	1.25161e+06	16273.1
Taf8	true	false	false	inner cell mass cell proliferation;transcription, DNA-dependent;regulation of transcription, DNA-dependent;multicellular organismal development;cell differentiation;regulation of fat cell differentiation;positive regulation of transcription, DNA-dependent;maintenance of protein location in nucleus	nucleus;transcription factor TFIID complex;cytoplasm;perinuclear region of cytoplasm	DNA binding	231324	16246.9
Taf8	true	false	false	inner cell mass cell proliferation;transcription, DNA-dependent;regulation of transcription, DNA-dependent;multicellular organismal development;cell differentiation;regulation of fat cell differentiation;positive regulation of transcription, DNA-dependent;maintenance of protein location in nucleus	nucleus;transcription factor TFIID complex;cytoplasm;perinuclear region of cytoplasm	DNA binding	231324	16246.9
Taf8	false	true	false	inner cell mass cell proliferation;transcription, DNA-dependent;regulation of transcription, DNA-dependent;multicellular organismal development;cell differentiation;regulation of fat cell differentiation;positive regulation of transcription, DNA-dependent;maintenance of protein location in nucleus	nucleus;transcription factor TFIID complex;cytoplasm;perinuclear region of cytoplasm	DNA binding	231324	16246.9
Rbpms	false	true	false	transcription, DNA-dependent;regulation of transcription, DNA-dependent;positive regulation of pathway-restricted SMAD protein phosphorylation;positive regulation of SMAD protein import into nucleus;regulation of RNA biosynthetic process	nucleus;cytoplasm	nucleotide binding;nucleic acid binding;transcription coactivator activity;RNA binding;poly(A) RNA binding	2.38054e+06	16172.3
Rbpms	false	false	false	transcription, DNA-dependent;regulation of transcription, DNA-dependent;positive regulation of pathway-restricted SMAD protein phosphorylation;positive regulation of SMAD protein import into nucleus;regulation of RNA biosynthetic process	nucleus;cytoplasm	nucleotide binding;nucleic acid binding;transcription coactivator activity;RNA binding;poly(A) RNA binding	2.38054e+06	16172.3
Rbpms	true	false	false	transcription, DNA-dependent;regulation of transcription, DNA-dependent;positive regulation of pathway-restricted SMAD protein phosphorylation;positive regulation of SMAD protein import into nucleus;regulation of RNA biosynthetic process	nucleus;cytoplasm	nucleotide binding;nucleic acid binding;transcription coactivator activity;RNA binding;poly(A) RNA binding	2.38054e+06	16172.3
Rbpms	false	false	true	transcription, DNA-dependent;regulation of transcription, DNA-dependent;positive regulation of pathway-restricted SMAD protein phosphorylation;positive regulation of SMAD protein import into nucleus;regulation of RNA biosynthetic process	nucleus;cytoplasm	nucleotide binding;nucleic acid binding;transcription coactivator activity;RNA binding;poly(A) RNA binding	2.38054e+06	16172.3
Rbpms	false	false	true	transcription, DNA-dependent;regulation of transcription, DNA-dependent;positive regulation of pathway-restricted SMAD protein phosphorylation;positive regulation of SMAD protein import into nucleus;regulation of RNA biosynthetic process	nucleus;cytoplasm	nucleotide binding;nucleic acid binding;transcription coactivator activity;RNA binding;poly(A) RNA binding	2.38054e+06	16172.3
Myst2	false	true	false	DNA replication;transcription, DNA-dependent;regulation of transcription, DNA-dependent;chromatin modification;histone acetylation;histone H3 acetylation;histone H4-K5 acetylation;histone H4-K8 acetylation;histone H4-K12 acetylation	histone acetyltransferase complex;intracellular;nucleus;nucleoplasm	sequence-specific DNA binding transcription factor activity;histone acetyltransferase activity;zinc ion binding;transferase activity;transferase activity, transferring acyl groups;transferase activity, transferring acyl groups other than amino-acyl groups;metal ion binding	618224	16102.1
Myst2	true	false	false	DNA replication;transcription, DNA-dependent;regulation of transcription, DNA-dependent;chromatin modification;histone acetylation;histone H3 acetylation;histone H4-K5 acetylation;histone H4-K8 acetylation;histone H4-K12 acetylation	histone acetyltransferase complex;intracellular;nucleus;nucleoplasm	sequence-specific DNA binding transcription factor activity;histone acetyltransferase activity;zinc ion binding;transferase activity;transferase activity, transferring acyl groups;transferase activity, transferring acyl groups other than amino-acyl groups;metal ion binding	618224	16102.1
Smarcb1	true	false	false	blastocyst development;blastocyst hatching;nucleosome disassembly;chromatin remodeling;transcription, DNA-dependent;regulation of transcription, DNA-dependent;cell cycle;nervous system development;negative regulation of cell proliferation;chromatin modification;cell differentiation;positive regulation by host of viral transcription;retroviral genome replication;positive regulation of transcriptio…	nuclear chromosome;XY body;soluble fraction;nucleus;nucleolus;SWI/SNF complex;chromatin remodeling complex;npBAF complex;nBAF complex	p53 binding;transcription coactivator activity;protein binding;Tat protein binding	398007	16018.9
Tfam	false	false	false	transcription, DNA-dependent;regulation of transcription, DNA-dependent;transcription from mitochondrial promoter;transcription initiation from mitochondrial promoter;mitochondrial respiratory chain complex assembly;positive regulation of transcription, DNA-dependent	nucleus;transcription factor complex;mitochondrion;mitochondrial nucleoid	DNA binding;chromatin binding;sequence-specific DNA binding transcription factor activity;mitochondrial light strand promoter sense binding	200397	15945
Zfp653	true	false	false	transcription, DNA-dependent;regulation of transcription, DNA-dependent;biological_process	cellular_component;intracellular;nucleus	molecular_function;nucleic acid binding;DNA binding;zinc ion binding;metal ion binding	252630	15902.7
Rreb1	true	false	false	transcription, DNA-dependent;regulation of transcription, DNA-dependent;biological_process	cellular_component;intracellular;nucleus	molecular_function;nucleic acid binding;DNA binding;zinc ion binding;metal ion binding	1.97615e+06	15797.7
Rreb1	false	false	true	transcription, DNA-dependent;regulation of transcription, DNA-dependent;biological_process	cellular_component;intracellular;nucleus	molecular_function;nucleic acid binding;DNA binding;zinc ion binding;metal ion binding	1.97615e+06	15797.7
Rreb1	false	false	false	transcription, DNA-dependent;regulation of transcription, DNA-dependent;biological_process	cellular_component;intracellular;nucleus	molecular_function;nucleic acid binding;DNA binding;zinc ion binding;metal ion binding	1.97615e+06	15797.7
Rreb1	false	false	false	transcription, DNA-dependent;regulation of transcription, DNA-dependent;biological_process	cellular_component;intracellular;nucleus	molecular_function;nucleic acid binding;DNA binding;zinc ion binding;metal ion binding	1.97615e+06	15797.7
Rreb1	true	false	false	transcription, DNA-dependent;regulation of transcription, DNA-dependent;biological_process	cellular_component;intracellular;nucleus	molecular_function;nucleic acid binding;DNA binding;zinc ion binding;metal ion binding	1.97615e+06	15797.7
Rreb1	false	true	false	transcription, DNA-dependent;regulation of transcription, DNA-dependent;biological_process	cellular_component;intracellular;nucleus	molecular_function;nucleic acid binding;DNA binding;zinc ion binding;metal ion binding	1.97615e+06	15797.7
Rreb1	false	true	false	transcription, DNA-dependent;regulation of transcription, DNA-dependent;biological_process	cellular_component;intracellular;nucleus	molecular_function;nucleic acid binding;DNA binding;zinc ion binding;metal ion binding	1.97615e+06	15797.7
Rreb1	false	true	false	transcription, DNA-dependent;regulation of transcription, DNA-dependent;biological_process	cellular_component;intracellular;nucleus	molecular_function;nucleic acid binding;DNA binding;zinc ion binding;metal ion binding	1.97615e+06	15797.7
Rreb1	true	false	false	transcription, DNA-dependent;regulation of transcription, DNA-dependent;biological_process	cellular_component;intracellular;nucleus	molecular_function;nucleic acid binding;DNA binding;zinc ion binding;metal ion binding	1.97615e+06	15797.7
Rreb1	true	false	false	transcription, DNA-dependent;regulation of transcription, DNA-dependent;biological_process	cellular_component;intracellular;nucleus	molecular_function;nucleic acid binding;DNA binding;zinc ion binding;metal ion binding	1.97615e+06	15797.7
Rreb1	false	true	false	transcription, DNA-dependent;regulation of transcription, DNA-dependent;biological_process	cellular_component;intracellular;nucleus	molecular_function;nucleic acid binding;DNA binding;zinc ion binding;metal ion binding	1.97615e+06	15797.7
Rreb1	false	false	false	transcription, DNA-dependent;regulation of transcription, DNA-dependent;biological_process	cellular_component;intracellular;nucleus	molecular_function;nucleic acid binding;DNA binding;zinc ion binding;metal ion binding	1.97615e+06	15797.7
Rreb1	false	false	false	transcription, DNA-dependent;regulation of transcription, DNA-dependent;biological_process	cellular_component;intracellular;nucleus	molecular_function;nucleic acid binding;DNA binding;zinc ion binding;metal ion binding	1.97615e+06	15797.7
Tle1	false	false	true	negative regulation of transcription from RNA polymerase II promoter;transcription, DNA-dependent;regulation of transcription, DNA-dependent;regulation of transcription from RNA polymerase II promoter;Wnt receptor signaling pathway;negative regulation of I-kappaB kinase/NF-kappaB cascade;negative regulation of transcription, DNA-dependent	nucleus;transcription factor complex;cytoplasm	RNA polymerase II transcription corepressor activity;chromatin binding;transcription corepressor activity;protein binding;transcription factor binding	1.32272e+06	15788.4
Tle1	false	false	true	negative regulation of transcription from RNA polymerase II promoter;transcription, DNA-dependent;regulation of transcription, DNA-dependent;regulation of transcription from RNA polymerase II promoter;Wnt receptor signaling pathway;negative regulation of I-kappaB kinase/NF-kappaB cascade;negative regulation of transcription, DNA-dependent	nucleus;transcription factor complex;cytoplasm	RNA polymerase II transcription corepressor activity;chromatin binding;transcription corepressor activity;protein binding;transcription factor binding	1.32272e+06	15788.4
Tle1	false	true	false	negative regulation of transcription from RNA polymerase II promoter;transcription, DNA-dependent;regulation of transcription, DNA-dependent;regulation of transcription from RNA polymerase II promoter;Wnt receptor signaling pathway;negative regulation of I-kappaB kinase/NF-kappaB cascade;negative regulation of transcription, DNA-dependent	nucleus;transcription factor complex;cytoplasm	RNA polymerase II transcription corepressor activity;chromatin binding;transcription corepressor activity;protein binding;transcription factor binding	1.32272e+06	15788.4
Hbp1	false	true	false	transcription, DNA-dependent;regulation of transcription, DNA-dependent;Wnt receptor signaling pathway;positive regulation of potassium ion transport	nucleus	DNA binding;binding;protein binding	379896	15775.7
Nfix	false	false	false	negative regulation of transcription from RNA polymerase II promoter;DNA replication;transcription, DNA-dependent;regulation of transcription, DNA-dependent;positive regulation of transcription from RNA polymerase II promoter	intracellular;nucleus	DNA binding;sequence-specific DNA binding transcription factor activity;protein binding	1.46251e+06	15769.7
Nfix	false	false	false	negative regulation of transcription from RNA polymerase II promoter;DNA replication;transcription, DNA-dependent;regulation of transcription, DNA-dependent;positive regulation of transcription from RNA polymerase II promoter	intracellular;nucleus	DNA binding;sequence-specific DNA binding transcription factor activity;protein binding	1.46251e+06	15769.7
Nfix	false	false	false	negative regulation of transcription from RNA polymerase II promoter;DNA replication;transcription, DNA-dependent;regulation of transcription, DNA-dependent;positive regulation of transcription from RNA polymerase II promoter	intracellular;nucleus	DNA binding;sequence-specific DNA binding transcription factor activity;protein binding	1.46251e+06	15769.7
Nfix	true	false	false	negative regulation of transcription from RNA polymerase II promoter;DNA replication;transcription, DNA-dependent;regulation of transcription, DNA-dependent;positive regulation of transcription from RNA polymerase II promoter	intracellular;nucleus	DNA binding;sequence-specific DNA binding transcription factor activity;protein binding	1.46251e+06	15769.7
Nfix	false	false	false	negative regulation of transcription from RNA polymerase II promoter;DNA replication;transcription, DNA-dependent;regulation of transcription, DNA-dependent;positive regulation of transcription from RNA polymerase II promoter	intracellular;nucleus	DNA binding;sequence-specific DNA binding transcription factor activity;protein binding	1.46251e+06	15769.7
Gzf1	false	false	true	negative regulation of transcription from RNA polymerase II promoter;branching involved in ureteric bud morphogenesis;transcription, DNA-dependent;regulation of transcription, DNA-dependent;negative regulation of transcription, DNA-dependent	intracellular;nucleus;cytoplasm	nucleic acid binding;DNA binding;zinc ion binding;sequence-specific DNA binding;metal ion binding	185948	15718.4
Fosb	true	false	false	regulation of transcription, DNA-dependent;transcription from RNA polymerase II promoter;cellular response to calcium ion	nucleus	DNA binding;double-stranded DNA binding;sequence-specific DNA binding transcription factor activity;sequence-specific DNA binding;protein dimerization activity	115357	15694.9
Fosb	true	false	false	regulation of transcription, DNA-dependent;transcription from RNA polymerase II promoter;cellular response to calcium ion	nucleus	DNA binding;double-stranded DNA binding;sequence-specific DNA binding transcription factor activity;sequence-specific DNA binding;protein dimerization activity	115357	15694.9
Med18	false	true	false	transcription, DNA-dependent;regulation of transcription, DNA-dependent;regulation of transcription from RNA polymerase II promoter;biological_process	nucleus;mediator complex	RNA polymerase II transcription cofactor activity	81275.7	15651
Med18	true	false	false	transcription, DNA-dependent;regulation of transcription, DNA-dependent;regulation of transcription from RNA polymerase II promoter;biological_process	nucleus;mediator complex	RNA polymerase II transcription cofactor activity	81275.7	15651
Med18	false	false	false	transcription, DNA-dependent;regulation of transcription, DNA-dependent;regulation of transcription from RNA polymerase II promoter;biological_process	nucleus;mediator complex	RNA polymerase II transcription cofactor activity	81275.7	15651
Foxp4	false	true	false	negative regulation of transcription from RNA polymerase II promoter;transcription, DNA-dependent;regulation of transcription, DNA-dependent;pattern specification process;heart development;tissue development;embryonic foregut morphogenesis;regulation of sequence-specific DNA binding transcription factor activity	intracellular;nucleus;transcription factor complex;cytoplasm	DNA binding;chromatin binding;double-stranded DNA binding;sequence-specific DNA binding transcription factor activity;sequence-specific distal enhancer binding RNA polymerase II transcription factor activity;transcription factor binding;zinc ion binding;DNA binding, bending;protein homodimerization activity;sequence-specific DNA binding;metal ion binding;protein heterodimerization activity	878199	15273
Maml1	true	false	false	transcription, DNA-dependent;regulation of transcription, DNA-dependent;protein phosphorylation;Notch signaling pathway;positive regulation of myotube differentiation;positive regulation of transcription from RNA polymerase II promoter;positive regulation of muscle cell differentiation	MAML1-RBP-Jkappa- ICN1 complex;nucleus;nuclear speck;intracellular membrane-bounded organelle	transcription coactivator activity;protein kinase binding;peptide antigen binding	557140	15180.1
Dnmt3a	false	false	true	negative regulation of transcription from RNA polymerase II promoter;DNA methylation;methylation-dependent chromatin silencing;regulation of gene expression by genetic imprinting;transcription, DNA-dependent;regulation of transcription, DNA-dependent;spermatogenesis;maintenance of DNA methylation;DNA methylation on cytosine within a CG sequence;chromatin modification;methylation;DNA methylation i…	chromosome, centromeric region;euchromatin;heterochromatin;nucleus;nuclear heterochromatin;cytoplasm;nuclear matrix	DNA binding;chromatin binding;DNA (cytosine-5-)-methyltransferase activity;protein binding;methyltransferase activity;transferase activity;unmethylated CpG binding;metal ion binding;DNA (cytosine-5-)-methyltransferase activity, acting on CpG substrates	1.62971e+06	15165.2
Dnmt3a	false	true	false	negative regulation of transcription from RNA polymerase II promoter;DNA methylation;methylation-dependent chromatin silencing;regulation of gene expression by genetic imprinting;transcription, DNA-dependent;regulation of transcription, DNA-dependent;spermatogenesis;maintenance of DNA methylation;DNA methylation on cytosine within a CG sequence;chromatin modification;methylation;DNA methylation i…	chromosome, centromeric region;euchromatin;heterochromatin;nucleus;nuclear heterochromatin;cytoplasm;nuclear matrix	DNA binding;chromatin binding;DNA (cytosine-5-)-methyltransferase activity;protein binding;methyltransferase activity;transferase activity;unmethylated CpG binding;metal ion binding;DNA (cytosine-5-)-methyltransferase activity, acting on CpG substrates	1.62971e+06	15165.2
Zfp661	true	false	false	transcription, DNA-dependent;regulation of transcription, DNA-dependent;biological_process	cellular_component;intracellular;nucleus	molecular_function;nucleic acid binding;DNA binding;zinc ion binding;metal ion binding	138416	15135.7
Etv3	true	false	false	negative regulation of transcription from RNA polymerase II promoter;transcription, DNA-dependent;regulation of transcription, DNA-dependent	nucleus;transcriptional repressor complex	DNA binding;sequence-specific DNA binding transcription factor activity;protein binding;sequence-specific DNA binding	216652	14860.6
Etv3	false	false	true	negative regulation of transcription from RNA polymerase II promoter;transcription, DNA-dependent;regulation of transcription, DNA-dependent	nucleus;transcriptional repressor complex	DNA binding;sequence-specific DNA binding transcription factor activity;protein binding;sequence-specific DNA binding	216652	14860.6
Mycn	false	false	true	cartilage condensation;positive regulation of mesenchymal cell proliferation;regulation of transcription, DNA-dependent;positive regulation of cell proliferation;positive regulation of cell death;lung development;embryonic digit morphogenesis;positive regulation of transcription, DNA-dependent;positive regulation of transcription from RNA polymerase II promoter;embryonic skeletal system morphogen…	nucleus	DNA binding;sequence-specific DNA binding transcription factor activity;protein binding	84894.2	14779.6
Mycn	false	false	true	cartilage condensation;positive regulation of mesenchymal cell proliferation;regulation of transcription, DNA-dependent;positive regulation of cell proliferation;positive regulation of cell death;lung development;embryonic digit morphogenesis;positive regulation of transcription, DNA-dependent;positive regulation of transcription from RNA polymerase II promoter;embryonic skeletal system morphogen…	nucleus	DNA binding;sequence-specific DNA binding transcription factor activity;protein binding	84894.2	14779.6
Ctcfl	false	true	false	regulation of gene expression by genetic imprinting;transcription, DNA-dependent;regulation of transcription, DNA-dependent;positive regulation of gene expression;chromatin modification;histone methylation;DNA methylation involved in gamete generation;positive regulation of transcription, DNA-dependent;regulation of histone H3-K4 methylation	intracellular;nucleus;cytoplasm	nucleic acid binding;DNA binding;protein binding;zinc ion binding;histone binding;sequence-specific DNA binding;transcription regulatory region DNA binding;metal ion binding	378301	14596.7
Foxk1	true	false	false	negative regulation of transcription from RNA polymerase II promoter;transcription, DNA-dependent;regulation of transcription, DNA-dependent;regulation of transcription from RNA polymerase II promoter;multicellular organismal development;pattern specification process;muscle organ development;embryo development;tissue development;cell differentiation;negative regulation of cell growth;negative reg…	nucleus;transcription factor complex;nucleolus	magnesium ion binding;DNA binding;double-stranded DNA binding;sequence-specific DNA binding transcription factor activity;sequence-specific distal enhancer binding RNA polymerase II transcription factor activity;protein binding;transcription factor binding;DNA binding, bending;sequence-specific DNA binding	881554	14566.6
Foxk1	true	false	false	negative regulation of transcription from RNA polymerase II promoter;transcription, DNA-dependent;regulation of transcription, DNA-dependent;regulation of transcription from RNA polymerase II promoter;multicellular organismal development;pattern specification process;muscle organ development;embryo development;tissue development;cell differentiation;negative regulation of cell growth;negative reg…	nucleus;transcription factor complex;nucleolus	magnesium ion binding;DNA binding;double-stranded DNA binding;sequence-specific DNA binding transcription factor activity;sequence-specific distal enhancer binding RNA polymerase II transcription factor activity;protein binding;transcription factor binding;DNA binding, bending;sequence-specific DNA binding	881554	14566.6
Irf8	true	false	false	transcription, DNA-dependent;regulation of transcription, DNA-dependent;phagocytosis;immune response;response to bacterium;myeloid cell differentiation;positive regulation of interferon-gamma production;positive regulation of interleukin-12 production;defense response to bacterium;defense response to protozoan;negative regulation of growth of symbiont in host;positive regulation of transcription,…	nucleus	regulatory region DNA binding;DNA binding;sequence-specific DNA binding transcription factor activity;protein binding	295265	14532.9
Irf6	true	false	false	transcription, DNA-dependent;regulation of transcription, DNA-dependent;cell cycle arrest;negative regulation of cell proliferation;cell differentiation;keratinocyte differentiation;skin development;keratinocyte proliferation;positive regulation of transcription, DNA-dependent;cell development	nucleus;cytoplasm	regulatory region DNA binding;DNA binding;sequence-specific DNA binding transcription factor activity	274058	14482
Banp	true	false	false	transcription, DNA-dependent;regulation of transcription, DNA-dependent;cell cycle;multicellular organismal development;chromatin modification;protein localization to nucleus;negative regulation of protein catabolic process	nucleus	p53 binding;DNA binding;protein binding	1.13151e+06	14372.8
Banp	true	false	false	transcription, DNA-dependent;regulation of transcription, DNA-dependent;cell cycle;multicellular organismal development;chromatin modification;protein localization to nucleus;negative regulation of protein catabolic process	nucleus	p53 binding;DNA binding;protein binding	1.13151e+06	14372.8
Banp	false	true	false	transcription, DNA-dependent;regulation of transcription, DNA-dependent;cell cycle;multicellular organismal development;chromatin modification;protein localization to nucleus;negative regulation of protein catabolic process	nucleus	p53 binding;DNA binding;protein binding	1.13151e+06	14372.8
Banp	false	false	false	transcription, DNA-dependent;regulation of transcription, DNA-dependent;cell cycle;multicellular organismal development;chromatin modification;protein localization to nucleus;negative regulation of protein catabolic process	nucleus	p53 binding;DNA binding;protein binding	1.13151e+06	14372.8
Med11	true	false	false	transcription, DNA-dependent;regulation of transcription, DNA-dependent;regulation of transcription from RNA polymerase II promoter;biological_process	nucleus;mediator complex	RNA polymerase II transcription cofactor activity;molecular_function	25326.4	14101.5
Fam120b	false	true	false	transcription, DNA-dependent;regulation of transcription, DNA-dependent;cell differentiation	nucleus		526288	14079.4
Fam120b	false	true	false	transcription, DNA-dependent;regulation of transcription, DNA-dependent;cell differentiation	nucleus		526288	14079.4
Tfdp1	true	false	false	S phase of mitotic cell cycle;transcription, DNA-dependent;regulation of transcription, DNA-dependent;apoptotic process;cell cycle;epidermis development;positive regulation of transcription, DNA-dependent	nucleus;transcription factor complex	DNA binding;sequence-specific DNA binding transcription factor activity;protein binding;transcription factor binding;protein domain specific binding	533678	14033.5
Foxo1	false	false	false	negative regulation of transcription from RNA polymerase II promoter;blood vessel development;transcription, DNA-dependent;regulation of transcription, DNA-dependent;regulation of transcription from RNA polymerase II promoter;anti-apoptosis;response to DNA damage stimulus;pattern specification process;insulin receptor signaling pathway;embryo development;tissue development;negative regulation of …	nucleus;transcription factor complex;cytoplasm;cytosol	DNA binding;double-stranded DNA binding;sequence-specific DNA binding transcription factor activity;sequence-specific distal enhancer binding RNA polymerase II transcription factor activity;protein binding;transcription factor binding;DNA binding, bending;protein kinase binding;sequence-specific DNA binding	1.13694e+06	13903.6
Foxo1	false	true	false	negative regulation of transcription from RNA polymerase II promoter;blood vessel development;transcription, DNA-dependent;regulation of transcription, DNA-dependent;regulation of transcription from RNA polymerase II promoter;anti-apoptosis;response to DNA damage stimulus;pattern specification process;insulin receptor signaling pathway;embryo development;tissue development;negative regulation of …	nucleus;transcription factor complex;cytoplasm;cytosol	DNA binding;double-stranded DNA binding;sequence-specific DNA binding transcription factor activity;sequence-specific distal enhancer binding RNA polymerase II transcription factor activity;protein binding;transcription factor binding;DNA binding, bending;protein kinase binding;sequence-specific DNA binding	1.13694e+06	13903.6
Foxo1	false	true	false	negative regulation of transcription from RNA polymerase II promoter;blood vessel development;transcription, DNA-dependent;regulation of transcription, DNA-dependent;regulation of transcription from RNA polymerase II promoter;anti-apoptosis;response to DNA damage stimulus;pattern specification process;insulin receptor signaling pathway;embryo development;tissue development;negative regulation of …	nucleus;transcription factor complex;cytoplasm;cytosol	DNA binding;double-stranded DNA binding;sequence-specific DNA binding transcription factor activity;sequence-specific distal enhancer binding RNA polymerase II transcription factor activity;protein binding;transcription factor binding;DNA binding, bending;protein kinase binding;sequence-specific DNA binding	1.13694e+06	13903.6
Foxo1	true	false	false	negative regulation of transcription from RNA polymerase II promoter;blood vessel development;transcription, DNA-dependent;regulation of transcription, DNA-dependent;regulation of transcription from RNA polymerase II promoter;anti-apoptosis;response to DNA damage stimulus;pattern specification process;insulin receptor signaling pathway;embryo development;tissue development;negative regulation of …	nucleus;transcription factor complex;cytoplasm;cytosol	DNA binding;double-stranded DNA binding;sequence-specific DNA binding transcription factor activity;sequence-specific distal enhancer binding RNA polymerase II transcription factor activity;protein binding;transcription factor binding;DNA binding, bending;protein kinase binding;sequence-specific DNA binding	1.13694e+06	13903.6
Thrap3	false	true	false	transcription, DNA-dependent;regulation of transcription, DNA-dependent;transcription from RNA polymerase II promoter;transcription initiation from RNA polymerase II promoter;intracellular steroid hormone receptor signaling pathway;androgen receptor signaling pathway;positive regulation of transcription, DNA-dependent;positive regulation of transcription from RNA polymerase II promoter	nucleus;mediator complex;intracellular membrane-bounded organelle	nucleotide binding;RNA polymerase II transcription cofactor activity;transcription cofactor activity;transcription coactivator activity;receptor activity;ATP binding;thyroid hormone receptor binding	528937	13693.1
Thrap3	false	false	false	transcription, DNA-dependent;regulation of transcription, DNA-dependent;transcription from RNA polymerase II promoter;transcription initiation from RNA polymerase II promoter;intracellular steroid hormone receptor signaling pathway;androgen receptor signaling pathway;positive regulation of transcription, DNA-dependent;positive regulation of transcription from RNA polymerase II promoter	nucleus;mediator complex;intracellular membrane-bounded organelle	nucleotide binding;RNA polymerase II transcription cofactor activity;transcription cofactor activity;transcription coactivator activity;receptor activity;ATP binding;thyroid hormone receptor binding	528937	13693.1
Srebf2	false	false	true	transcription, DNA-dependent;regulation of transcription, DNA-dependent;lipid metabolic process;steroid metabolic process;cholesterol metabolic process;response to hormone stimulus;positive regulation of transcription via sterol regulatory element binding;positive regulation of transcription, DNA-dependent;positive regulation of transcription from RNA polymerase II promoter	nucleus;cytoplasm;endoplasmic reticulum;microsome;Golgi apparatus;membrane;integral to membrane;dendrite;cytoplasmic vesicle;SREBP-SCAP-Insig complex	DNA binding;chromatin binding;sequence-specific DNA binding transcription factor activity;protein binding;protein C-terminus binding;sequence-specific DNA binding	784111	13591.3
Srebf2	false	true	false	transcription, DNA-dependent;regulation of transcription, DNA-dependent;lipid metabolic process;steroid metabolic process;cholesterol metabolic process;response to hormone stimulus;positive regulation of transcription via sterol regulatory element binding;positive regulation of transcription, DNA-dependent;positive regulation of transcription from RNA polymerase II promoter	nucleus;cytoplasm;endoplasmic reticulum;microsome;Golgi apparatus;membrane;integral to membrane;dendrite;cytoplasmic vesicle;SREBP-SCAP-Insig complex	DNA binding;chromatin binding;sequence-specific DNA binding transcription factor activity;protein binding;protein C-terminus binding;sequence-specific DNA binding	784111	13591.3
Srebf2	false	true	false	transcription, DNA-dependent;regulation of transcription, DNA-dependent;lipid metabolic process;steroid metabolic process;cholesterol metabolic process;response to hormone stimulus;positive regulation of transcription via sterol regulatory element binding;positive regulation of transcription, DNA-dependent;positive regulation of transcription from RNA polymerase II promoter	nucleus;cytoplasm;endoplasmic reticulum;microsome;Golgi apparatus;membrane;integral to membrane;dendrite;cytoplasmic vesicle;SREBP-SCAP-Insig complex	DNA binding;chromatin binding;sequence-specific DNA binding transcription factor activity;protein binding;protein C-terminus binding;sequence-specific DNA binding	784111	13591.3
Ruvbl2	true	false	false	ATP catabolic process;DNA repair;DNA recombination;transcription, DNA-dependent;regulation of transcription, DNA-dependent;response to DNA damage stimulus;chromatin modification;cellular response to UV;histone H4 acetylation;histone H2A acetylation	intracellular;nucleus;ribonucleoprotein complex;Ino80 complex;NuA4 histone acetyltransferase complex;MLL1 complex	nucleotide binding;DNA helicase activity;damaged DNA binding;helicase activity;ATP binding;hydrolase activity;nucleoside-triphosphatase activity;identical protein binding	169952	13523.7
Spen	true	false	false	transcription, DNA-dependent;regulation of transcription, DNA-dependent;Notch signaling pathway;negative regulation of transcription, DNA-dependent;positive regulation of transcription, DNA-dependent	nucleus	nucleotide binding;nucleic acid binding;DNA binding;single-stranded DNA binding;sequence-specific DNA binding transcription factor activity;transcription corepressor activity;RNA binding;binding;protein binding	956075	13521.5
Spen	true	false	false	transcription, DNA-dependent;regulation of transcription, DNA-dependent;Notch signaling pathway;negative regulation of transcription, DNA-dependent;positive regulation of transcription, DNA-dependent	nucleus	nucleotide binding;nucleic acid binding;DNA binding;single-stranded DNA binding;sequence-specific DNA binding transcription factor activity;transcription corepressor activity;RNA binding;binding;protein binding	956075	13521.5
Sin3a	false	false	true	negative regulation of transcription from RNA polymerase II promoter;in utero embryonic development;DNA replication;transcription, DNA-dependent;regulation of transcription, DNA-dependent;aging;response to organic nitrogen;cellular protein localization;negative regulation of apoptotic process;regulation of transcription from RNA polymerase II promoter in response to oxidative stress;negative regu…	kinetochore;chromatin;nucleus;transcription factor complex;Sin3 complex;transcriptional repressor complex;protein complex	RNA polymerase II transcription corepressor activity;DNA binding;chromatin binding;sequence-specific DNA binding transcription factor activity;transcription corepressor activity;protein binding;transcription factor binding;protein complex binding	757902	13454.9
Sin3a	false	true	false	negative regulation of transcription from RNA polymerase II promoter;in utero embryonic development;DNA replication;transcription, DNA-dependent;regulation of transcription, DNA-dependent;aging;response to organic nitrogen;cellular protein localization;negative regulation of apoptotic process;regulation of transcription from RNA polymerase II promoter in response to oxidative stress;negative regu…	kinetochore;chromatin;nucleus;transcription factor complex;Sin3 complex;transcriptional repressor complex;protein complex	RNA polymerase II transcription corepressor activity;DNA binding;chromatin binding;sequence-specific DNA binding transcription factor activity;transcription corepressor activity;protein binding;transcription factor binding;protein complex binding	757902	13454.9
Irf2	true	false	false	transcription, DNA-dependent;regulation of transcription, DNA-dependent	nucleus;focal adhesion	regulatory region DNA binding;DNA binding;sequence-specific DNA binding transcription factor activity	1.43254e+06	13299.5
Irf2	false	true	false	transcription, DNA-dependent;regulation of transcription, DNA-dependent	nucleus;focal adhesion	regulatory region DNA binding;DNA binding;sequence-specific DNA binding transcription factor activity	1.43254e+06	13299.5
Irf2	false	false	true	transcription, DNA-dependent;regulation of transcription, DNA-dependent	nucleus;focal adhesion	regulatory region DNA binding;DNA binding;sequence-specific DNA binding transcription factor activity	1.43254e+06	13299.5
Gatad2a	false	true	false	blood vessel development;in utero embryonic development;neural fold formation;transcription, DNA-dependent;regulation of transcription, DNA-dependent;embryonic body morphogenesis;programmed cell death;anterior neuropore closure;negative regulation of transcription, DNA-dependent	nucleus;NuRD complex	protein binding, bridging;metal ion binding	1.18076e+06	13220.8
Rbbp4	false	false	false	DNA replication;chromatin remodeling;transcription, DNA-dependent;regulation of transcription, DNA-dependent;cell cycle;chromatin modification;chromatin assembly	nucleus;NuRD complex;NURF complex;CAF-1 complex;ESC/E(Z) complex	histone deacetylase binding	373621	13215.7
Ppargc1b	false	false	false	ossification;transcription, DNA-dependent;regulation of transcription, DNA-dependent;transcription from mitochondrial promoter;actin filament organization;positive regulation of alkaline phosphatase activity;intracellular estrogen receptor signaling pathway;cellular response to reactive oxygen species;positive regulation of phosphorylation;positive regulation of osteoclast differentiation;positiv…	nucleus;mitochondrion;mediator complex	nucleotide binding;RNA polymerase II transcription cofactor activity;nucleic acid binding;RNA binding;protein binding;estrogen receptor binding;ligand-dependent nuclear receptor transcription coactivator activity;receptor activator activity;AF-2 domain binding	1.34281e+06	13126.8
Ppargc1b	false	true	false	ossification;transcription, DNA-dependent;regulation of transcription, DNA-dependent;transcription from mitochondrial promoter;actin filament organization;positive regulation of alkaline phosphatase activity;intracellular estrogen receptor signaling pathway;cellular response to reactive oxygen species;positive regulation of phosphorylation;positive regulation of osteoclast differentiation;positiv…	nucleus;mitochondrion;mediator complex	nucleotide binding;RNA polymerase II transcription cofactor activity;nucleic acid binding;RNA binding;protein binding;estrogen receptor binding;ligand-dependent nuclear receptor transcription coactivator activity;receptor activator activity;AF-2 domain binding	1.34281e+06	13126.8
Ppargc1b	true	false	false	ossification;transcription, DNA-dependent;regulation of transcription, DNA-dependent;transcription from mitochondrial promoter;actin filament organization;positive regulation of alkaline phosphatase activity;intracellular estrogen receptor signaling pathway;cellular response to reactive oxygen species;positive regulation of phosphorylation;positive regulation of osteoclast differentiation;positiv…	nucleus;mitochondrion;mediator complex	nucleotide binding;RNA polymerase II transcription cofactor activity;nucleic acid binding;RNA binding;protein binding;estrogen receptor binding;ligand-dependent nuclear receptor transcription coactivator activity;receptor activator activity;AF-2 domain binding	1.34281e+06	13126.8
Ppargc1b	true	false	false	ossification;transcription, DNA-dependent;regulation of transcription, DNA-dependent;transcription from mitochondrial promoter;actin filament organization;positive regulation of alkaline phosphatase activity;intracellular estrogen receptor signaling pathway;cellular response to reactive oxygen species;positive regulation of phosphorylation;positive regulation of osteoclast differentiation;positiv…	nucleus;mitochondrion;mediator complex	nucleotide binding;RNA polymerase II transcription cofactor activity;nucleic acid binding;RNA binding;protein binding;estrogen receptor binding;ligand-dependent nuclear receptor transcription coactivator activity;receptor activator activity;AF-2 domain binding	1.34281e+06	13126.8
Nrbf2	false	true	false	transcription, DNA-dependent;regulation of transcription, DNA-dependent;regulation of transcription from RNA polymerase II promoter;positive regulation of transcription, DNA-dependent;positive regulation of ligand-dependent nuclear receptor transcription coactivator activity	nucleus;transcription factor complex;cytoplasm	transcription coactivator activity;ligand-dependent nuclear receptor binding	242126	13022.4
Nrbf2	true	false	false	transcription, DNA-dependent;regulation of transcription, DNA-dependent;regulation of transcription from RNA polymerase II promoter;positive regulation of transcription, DNA-dependent;positive regulation of ligand-dependent nuclear receptor transcription coactivator activity	nucleus;transcription factor complex;cytoplasm	transcription coactivator activity;ligand-dependent nuclear receptor binding	242126	13022.4
Myst1	true	false	false	transcription, DNA-dependent;regulation of transcription, DNA-dependent;chromatin modification;histone acetylation;myeloid cell differentiation;histone H4-K16 acetylation;negative regulation of transcription, DNA-dependent;positive regulation of transcription, DNA-dependent	kinetochore;nucleus;MLL1 complex;MSL complex	histone acetyltransferase activity;transcription factor binding;acetyltransferase activity;transferase activity;transferase activity, transferring acyl groups;transferase activity, transferring acyl groups other than amino-acyl groups;enzyme binding;methylated histone residue binding;metal ion binding	172399	13015.1
Cebpz	true	false	false	transcription, DNA-dependent;regulation of transcription, DNA-dependent	nucleus	binding	234926	13002.3
Zfp217	false	true	false	regulation of transcription, DNA-dependent;cell aging;negative regulation of transcription, DNA-dependent	histone deacetylase complex;nucleoplasm	transcription regulatory region DNA binding	442495	13002
Zfp217	false	true	false	regulation of transcription, DNA-dependent;cell aging;negative regulation of transcription, DNA-dependent	histone deacetylase complex;nucleoplasm	transcription regulatory region DNA binding	442495	13002
Zfp217	true	false	false	regulation of transcription, DNA-dependent;cell aging;negative regulation of transcription, DNA-dependent	histone deacetylase complex;nucleoplasm	transcription regulatory region DNA binding	442495	13002
Zfp217	false	false	true	regulation of transcription, DNA-dependent;cell aging;negative regulation of transcription, DNA-dependent	histone deacetylase complex;nucleoplasm	transcription regulatory region DNA binding	442495	13002
Med8	false	false	false	transcription, DNA-dependent;regulation of transcription, DNA-dependent;regulation of transcription from RNA polymerase II promoter	nucleus;mediator complex	RNA polymerase II transcription cofactor activity	83728.6	12989.2
Smad6	true	false	false	transcription, DNA-dependent;regulation of transcription, DNA-dependent;immune response;transforming growth factor beta receptor signaling pathway;zygotic specification of dorsal/ventral axis;negative regulation of SMAD protein complex assembly;negative regulation of transforming growth factor beta receptor signaling pathway;negative regulation of BMP signaling pathway;cell-substrate adhesion;neg…	intracellular;nucleus;transcription factor complex	chromatin binding;sequence-specific DNA binding transcription factor activity;protein binding;transforming growth factor beta receptor, inhibitory cytoplasmic mediator activity;ubiquitin protein ligase binding;type I transforming growth factor beta receptor binding;transcription regulatory region DNA binding;co-SMAD binding;I-SMAD binding;R-SMAD binding;type I activin receptor binding	886568	12851.8
Smad6	false	true	false	transcription, DNA-dependent;regulation of transcription, DNA-dependent;immune response;transforming growth factor beta receptor signaling pathway;zygotic specification of dorsal/ventral axis;negative regulation of SMAD protein complex assembly;negative regulation of transforming growth factor beta receptor signaling pathway;negative regulation of BMP signaling pathway;cell-substrate adhesion;neg…	intracellular;nucleus;transcription factor complex	chromatin binding;sequence-specific DNA binding transcription factor activity;protein binding;transforming growth factor beta receptor, inhibitory cytoplasmic mediator activity;ubiquitin protein ligase binding;type I transforming growth factor beta receptor binding;transcription regulatory region DNA binding;co-SMAD binding;I-SMAD binding;R-SMAD binding;type I activin receptor binding	886568	12851.8
Smad6	true	false	false	transcription, DNA-dependent;regulation of transcription, DNA-dependent;immune response;transforming growth factor beta receptor signaling pathway;zygotic specification of dorsal/ventral axis;negative regulation of SMAD protein complex assembly;negative regulation of transforming growth factor beta receptor signaling pathway;negative regulation of BMP signaling pathway;cell-substrate adhesion;neg…	intracellular;nucleus;transcription factor complex	chromatin binding;sequence-specific DNA binding transcription factor activity;protein binding;transforming growth factor beta receptor, inhibitory cytoplasmic mediator activity;ubiquitin protein ligase binding;type I transforming growth factor beta receptor binding;transcription regulatory region DNA binding;co-SMAD binding;I-SMAD binding;R-SMAD binding;type I activin receptor binding	886568	12851.8
Gata4	true	false	false	in utero embryonic development;gastrulation with mouth forming second;endoderm formation;heart looping;heart morphogenesis;outflow tract morphogenesis;atrioventricular valve morphogenesis;mitral valve formation;tricuspid valve formation;endocardial cushion development;cardiac right ventricle morphogenesis;ventricular cardiac muscle tissue development;ventricular septum development;atrial septum p…	nucleus	RNA polymerase II regulatory region sequence-specific DNA binding;sequence-specific DNA binding RNA polymerase II transcription factor activity;RNA polymerase II transcription factor binding transcription factor activity;enhancer sequence-specific DNA binding;DNA binding;chromatin binding;sequence-specific DNA binding transcription factor activity;sequence-specific distal enhancer binding RNA pol…	585038	12623.3
Lrpprc	true	false	false	transcription, DNA-dependent;regulation of transcription, DNA-dependent;transport;biological_process;mRNA transport	condensed nuclear chromosome;nucleus;cytoplasm;mitochondrion;cytoskeleton;membrane;mitochondrial nucleoid;perinuclear region of cytoplasm	DNA binding;single-stranded DNA binding;RNA binding;binding;protein binding;beta-tubulin binding	1.07147e+06	12526
Lrpprc	false	false	false	transcription, DNA-dependent;regulation of transcription, DNA-dependent;transport;biological_process;mRNA transport	condensed nuclear chromosome;nucleus;cytoplasm;mitochondrion;cytoskeleton;membrane;mitochondrial nucleoid;perinuclear region of cytoplasm	DNA binding;single-stranded DNA binding;RNA binding;binding;protein binding;beta-tubulin binding	1.07147e+06	12526
Lrpprc	false	true	false	transcription, DNA-dependent;regulation of transcription, DNA-dependent;transport;biological_process;mRNA transport	condensed nuclear chromosome;nucleus;cytoplasm;mitochondrion;cytoskeleton;membrane;mitochondrial nucleoid;perinuclear region of cytoplasm	DNA binding;single-stranded DNA binding;RNA binding;binding;protein binding;beta-tubulin binding	1.07147e+06	12526
Nr5a2	false	false	true	transcription, DNA-dependent;regulation of transcription, DNA-dependent;regulation of transcription from RNA polymerase II promoter;bile acid metabolic process;intracellular receptor mediated signaling pathway;regulation of cell proliferation;cholesterol homeostasis;steroid hormone mediated signaling pathway;positive regulation of viral genome replication;positive regulation of transcription, DNA…	nucleus;cytoplasm	DNA binding;double-stranded DNA binding;sequence-specific DNA binding transcription factor activity;steroid hormone receptor activity;receptor activity;ligand-activated sequence-specific DNA binding RNA polymerase II transcription factor activity;zinc ion binding;lipid binding;sequence-specific DNA binding;transcription regulatory region DNA binding;metal ion binding	1.4426e+06	12344.2
Nr5a2	false	false	true	transcription, DNA-dependent;regulation of transcription, DNA-dependent;regulation of transcription from RNA polymerase II promoter;bile acid metabolic process;intracellular receptor mediated signaling pathway;regulation of cell proliferation;cholesterol homeostasis;steroid hormone mediated signaling pathway;positive regulation of viral genome replication;positive regulation of transcription, DNA…	nucleus;cytoplasm	DNA binding;double-stranded DNA binding;sequence-specific DNA binding transcription factor activity;steroid hormone receptor activity;receptor activity;ligand-activated sequence-specific DNA binding RNA polymerase II transcription factor activity;zinc ion binding;lipid binding;sequence-specific DNA binding;transcription regulatory region DNA binding;metal ion binding	1.4426e+06	12344.2
Nr5a2	true	false	false	transcription, DNA-dependent;regulation of transcription, DNA-dependent;regulation of transcription from RNA polymerase II promoter;bile acid metabolic process;intracellular receptor mediated signaling pathway;regulation of cell proliferation;cholesterol homeostasis;steroid hormone mediated signaling pathway;positive regulation of viral genome replication;positive regulation of transcription, DNA…	nucleus;cytoplasm	DNA binding;double-stranded DNA binding;sequence-specific DNA binding transcription factor activity;steroid hormone receptor activity;receptor activity;ligand-activated sequence-specific DNA binding RNA polymerase II transcription factor activity;zinc ion binding;lipid binding;sequence-specific DNA binding;transcription regulatory region DNA binding;metal ion binding	1.4426e+06	12344.2
Nr5a2	false	false	false	transcription, DNA-dependent;regulation of transcription, DNA-dependent;regulation of transcription from RNA polymerase II promoter;bile acid metabolic process;intracellular receptor mediated signaling pathway;regulation of cell proliferation;cholesterol homeostasis;steroid hormone mediated signaling pathway;positive regulation of viral genome replication;positive regulation of transcription, DNA…	nucleus;cytoplasm	DNA binding;double-stranded DNA binding;sequence-specific DNA binding transcription factor activity;steroid hormone receptor activity;receptor activity;ligand-activated sequence-specific DNA binding RNA polymerase II transcription factor activity;zinc ion binding;lipid binding;sequence-specific DNA binding;transcription regulatory region DNA binding;metal ion binding	1.4426e+06	12344.2
Nr5a2	false	false	true	transcription, DNA-dependent;regulation of transcription, DNA-dependent;regulation of transcription from RNA polymerase II promoter;bile acid metabolic process;intracellular receptor mediated signaling pathway;regulation of cell proliferation;cholesterol homeostasis;steroid hormone mediated signaling pathway;positive regulation of viral genome replication;positive regulation of transcription, DNA…	nucleus;cytoplasm	DNA binding;double-stranded DNA binding;sequence-specific DNA binding transcription factor activity;steroid hormone receptor activity;receptor activity;ligand-activated sequence-specific DNA binding RNA polymerase II transcription factor activity;zinc ion binding;lipid binding;sequence-specific DNA binding;transcription regulatory region DNA binding;metal ion binding	1.4426e+06	12344.2
Tle3	false	true	false	transcription, DNA-dependent;regulation of transcription, DNA-dependent;multicellular organismal development;spermatogenesis;Wnt receptor signaling pathway;cell differentiation	nucleus	protein binding	566540	12280.9
Tle3	false	true	false	transcription, DNA-dependent;regulation of transcription, DNA-dependent;multicellular organismal development;spermatogenesis;Wnt receptor signaling pathway;cell differentiation	nucleus	protein binding	566540	12280.9
Tle3	false	false	false	transcription, DNA-dependent;regulation of transcription, DNA-dependent;multicellular organismal development;spermatogenesis;Wnt receptor signaling pathway;cell differentiation	nucleus	protein binding	566540	12280.9
Kdm4b	false	false	true	transcription, DNA-dependent;regulation of transcription, DNA-dependent;chromatin modification;oxidation-reduction process	nucleus	zinc ion binding;oxidoreductase activity;oxidoreductase activity, acting on single donors with incorporation of molecular oxygen, incorporation of two atoms of oxygen;metal ion binding	934683	12166.6
Wwc1	false	true	false	transcription, DNA-dependent;regulation of transcription, DNA-dependent;cell migration;regulation of hippo signaling cascade;positive regulation of MAPKKK cascade;regulation of RNA biosynthetic process	nucleus;cytoplasm;Golgi apparatus;plasma membrane;membrane;ruffle membrane;cell projection;protein complex;perinuclear region of cytoplasm	transcription coactivator activity;protein binding, bridging	1.71053e+06	12139
Wwc1	false	true	false	transcription, DNA-dependent;regulation of transcription, DNA-dependent;cell migration;regulation of hippo signaling cascade;positive regulation of MAPKKK cascade;regulation of RNA biosynthetic process	nucleus;cytoplasm;Golgi apparatus;plasma membrane;membrane;ruffle membrane;cell projection;protein complex;perinuclear region of cytoplasm	transcription coactivator activity;protein binding, bridging	1.71053e+06	12139
Wwc1	false	false	true	transcription, DNA-dependent;regulation of transcription, DNA-dependent;cell migration;regulation of hippo signaling cascade;positive regulation of MAPKKK cascade;regulation of RNA biosynthetic process	nucleus;cytoplasm;Golgi apparatus;plasma membrane;membrane;ruffle membrane;cell projection;protein complex;perinuclear region of cytoplasm	transcription coactivator activity;protein binding, bridging	1.71053e+06	12139
Wwc1	false	true	false	transcription, DNA-dependent;regulation of transcription, DNA-dependent;cell migration;regulation of hippo signaling cascade;positive regulation of MAPKKK cascade;regulation of RNA biosynthetic process	nucleus;cytoplasm;Golgi apparatus;plasma membrane;membrane;ruffle membrane;cell projection;protein complex;perinuclear region of cytoplasm	transcription coactivator activity;protein binding, bridging	1.71053e+06	12139
Wwc1	true	false	false	transcription, DNA-dependent;regulation of transcription, DNA-dependent;cell migration;regulation of hippo signaling cascade;positive regulation of MAPKKK cascade;regulation of RNA biosynthetic process	nucleus;cytoplasm;Golgi apparatus;plasma membrane;membrane;ruffle membrane;cell projection;protein complex;perinuclear region of cytoplasm	transcription coactivator activity;protein binding, bridging	1.71053e+06	12139
Wwc1	false	true	false	transcription, DNA-dependent;regulation of transcription, DNA-dependent;cell migration;regulation of hippo signaling cascade;positive regulation of MAPKKK cascade;regulation of RNA biosynthetic process	nucleus;cytoplasm;Golgi apparatus;plasma membrane;membrane;ruffle membrane;cell projection;protein complex;perinuclear region of cytoplasm	transcription coactivator activity;protein binding, bridging	1.71053e+06	12139
Med26	false	false	true	transcription, DNA-dependent;regulation of transcription, DNA-dependent;regulation of transcription from RNA polymerase II promoter	nucleus;mediator complex	RNA polymerase II transcription cofactor activity;DNA binding;protein binding	649089	12075.6
Pex14	false	false	false	transport;peroxisome organization;protein transport;protein import into peroxisome matrix;negative regulation of sequence-specific DNA binding transcription factor activity;negative regulation of transcription, DNA-dependent;protein homooligomerization	peroxisome;peroxisomal membrane;membrane;integral to membrane;protein complex	transcription corepressor activity;protein N-terminus binding	1.67468e+06	12024
Pex14	true	false	false	transport;peroxisome organization;protein transport;protein import into peroxisome matrix;negative regulation of sequence-specific DNA binding transcription factor activity;negative regulation of transcription, DNA-dependent;protein homooligomerization	peroxisome;peroxisomal membrane;membrane;integral to membrane;protein complex	transcription corepressor activity;protein N-terminus binding	1.67468e+06	12024
Pex14	false	true	false	transport;peroxisome organization;protein transport;protein import into peroxisome matrix;negative regulation of sequence-specific DNA binding transcription factor activity;negative regulation of transcription, DNA-dependent;protein homooligomerization	peroxisome;peroxisomal membrane;membrane;integral to membrane;protein complex	transcription corepressor activity;protein N-terminus binding	1.67468e+06	12024
Stat5b	false	false	true	allantoin metabolic process;luteinization;natural killer cell differentiation;liver development;citrate metabolic process;2-oxoglutarate metabolic process;succinate metabolic process;oxaloacetate metabolic process;transcription, DNA-dependent;regulation of transcription, DNA-dependent;regulation of transcription from RNA polymerase II promoter;transcription from RNA polymerase II promoter;isoleuc…	nucleus;cytoplasm;cytosol	RNA polymerase II core promoter sequence-specific DNA binding;DNA binding;double-stranded DNA binding;sequence-specific DNA binding transcription factor activity;signal transducer activity;calcium ion binding;protein binding;glucocorticoid receptor binding;sequence-specific DNA binding	838909	12009.3
Stat5b	false	false	false	allantoin metabolic process;luteinization;natural killer cell differentiation;liver development;citrate metabolic process;2-oxoglutarate metabolic process;succinate metabolic process;oxaloacetate metabolic process;transcription, DNA-dependent;regulation of transcription, DNA-dependent;regulation of transcription from RNA polymerase II promoter;transcription from RNA polymerase II promoter;isoleuc…	nucleus;cytoplasm;cytosol	RNA polymerase II core promoter sequence-specific DNA binding;DNA binding;double-stranded DNA binding;sequence-specific DNA binding transcription factor activity;signal transducer activity;calcium ion binding;protein binding;glucocorticoid receptor binding;sequence-specific DNA binding	838909	12009.3
Stat5b	false	false	false	allantoin metabolic process;luteinization;natural killer cell differentiation;liver development;citrate metabolic process;2-oxoglutarate metabolic process;succinate metabolic process;oxaloacetate metabolic process;transcription, DNA-dependent;regulation of transcription, DNA-dependent;regulation of transcription from RNA polymerase II promoter;transcription from RNA polymerase II promoter;isoleuc…	nucleus;cytoplasm;cytosol	RNA polymerase II core promoter sequence-specific DNA binding;DNA binding;double-stranded DNA binding;sequence-specific DNA binding transcription factor activity;signal transducer activity;calcium ion binding;protein binding;glucocorticoid receptor binding;sequence-specific DNA binding	838909	12009.3
E2f2	true	false	false	transcription, DNA-dependent;regulation of transcription, DNA-dependent;apoptotic process;cell cycle;regulation of cell cycle	nucleus;transcription factor complex	core promoter binding;DNA binding;sequence-specific DNA binding transcription factor activity;protein binding;transcription factor binding	283538	11982.3
E2f2	true	false	false	transcription, DNA-dependent;regulation of transcription, DNA-dependent;apoptotic process;cell cycle;regulation of cell cycle	nucleus;transcription factor complex	core promoter binding;DNA binding;sequence-specific DNA binding transcription factor activity;protein binding;transcription factor binding	283538	11982.3
Bcor	true	false	false	negative regulation of transcription from RNA polymerase II promoter;negative regulation of histone H3-K36 methylation;transcription, DNA-dependent;regulation of transcription, DNA-dependent;heart development;chromatin modification;negative regulation of bone mineralization;histone H2A monoubiquitination;odontogenesis;negative regulation of transcription, DNA-dependent;negative regulation of hist…	nucleus	transcription corepressor activity;protein binding;transcription factor binding;heat shock protein binding;histone deacetylase binding;transcription regulatory region DNA binding	1.46312e+06	11835.8
Bcor	true	false	false	negative regulation of transcription from RNA polymerase II promoter;negative regulation of histone H3-K36 methylation;transcription, DNA-dependent;regulation of transcription, DNA-dependent;heart development;chromatin modification;negative regulation of bone mineralization;histone H2A monoubiquitination;odontogenesis;negative regulation of transcription, DNA-dependent;negative regulation of hist…	nucleus	transcription corepressor activity;protein binding;transcription factor binding;heat shock protein binding;histone deacetylase binding;transcription regulatory region DNA binding	1.46312e+06	11835.8
Smad3	true	false	false	negative regulation of transcription from RNA polymerase II promoter;skeletal system development;osteoblast differentiation;response to hypoxia;in utero embryonic development;mesoderm formation;somitogenesis;release of cytochrome c from mitochondria;liver development;negative regulation of protein phosphorylation;heart looping;osteoblast development;immune system development;transcription, DNA-de…	intracellular;nucleus;nuclear inner membrane;transcription factor complex;cytoplasm;plasma membrane;protein complex;receptor complex;SMAD protein complex	core promoter proximal region sequence-specific DNA binding;RNA polymerase II activating transcription factor binding;DNA binding;chromatin binding;double-stranded DNA binding;sequence-specific DNA binding transcription factor activity;transforming growth factor beta receptor binding;protein binding;collagen binding;beta-catenin binding;transcription factor binding;zinc ion binding;protein kinase…	1.31383e+06	11812.1
Smad3	true	false	false	negative regulation of transcription from RNA polymerase II promoter;skeletal system development;osteoblast differentiation;response to hypoxia;in utero embryonic development;mesoderm formation;somitogenesis;release of cytochrome c from mitochondria;liver development;negative regulation of protein phosphorylation;heart looping;osteoblast development;immune system development;transcription, DNA-de…	intracellular;nucleus;nuclear inner membrane;transcription factor complex;cytoplasm;plasma membrane;protein complex;receptor complex;SMAD protein complex	core promoter proximal region sequence-specific DNA binding;RNA polymerase II activating transcription factor binding;DNA binding;chromatin binding;double-stranded DNA binding;sequence-specific DNA binding transcription factor activity;transforming growth factor beta receptor binding;protein binding;collagen binding;beta-catenin binding;transcription factor binding;zinc ion binding;protein kinase…	1.31383e+06	11812.1
Smad3	true	false	false	negative regulation of transcription from RNA polymerase II promoter;skeletal system development;osteoblast differentiation;response to hypoxia;in utero embryonic development;mesoderm formation;somitogenesis;release of cytochrome c from mitochondria;liver development;negative regulation of protein phosphorylation;heart looping;osteoblast development;immune system development;transcription, DNA-de…	intracellular;nucleus;nuclear inner membrane;transcription factor complex;cytoplasm;plasma membrane;protein complex;receptor complex;SMAD protein complex	core promoter proximal region sequence-specific DNA binding;RNA polymerase II activating transcription factor binding;DNA binding;chromatin binding;double-stranded DNA binding;sequence-specific DNA binding transcription factor activity;transforming growth factor beta receptor binding;protein binding;collagen binding;beta-catenin binding;transcription factor binding;zinc ion binding;protein kinase…	1.31383e+06	11812.1
Hlf	false	true	false	transcription, DNA-dependent;regulation of transcription, DNA-dependent;rhythmic process	nucleus	DNA binding;sequence-specific DNA binding transcription factor activity;sequence-specific DNA binding;protein dimerization activity	638781	11746
Hlf	true	false	false	transcription, DNA-dependent;regulation of transcription, DNA-dependent;rhythmic process	nucleus	DNA binding;sequence-specific DNA binding transcription factor activity;sequence-specific DNA binding;protein dimerization activity	638781	11746
Hlf	false	true	false	transcription, DNA-dependent;regulation of transcription, DNA-dependent;rhythmic process	nucleus	DNA binding;sequence-specific DNA binding transcription factor activity;sequence-specific DNA binding;protein dimerization activity	638781	11746
Lrrfip1	true	false	false	transcription, DNA-dependent;regulation of transcription, DNA-dependent	nucleus;cytoplasm	DNA binding;protein binding	1.52553e+06	11715.2
Lrrfip1	false	false	true	transcription, DNA-dependent;regulation of transcription, DNA-dependent	nucleus;cytoplasm	DNA binding;protein binding	1.52553e+06	11715.2
Lrrfip1	false	false	true	transcription, DNA-dependent;regulation of transcription, DNA-dependent	nucleus;cytoplasm	DNA binding;protein binding	1.52553e+06	11715.2
Smad1	true	false	false	MAPKKK cascade;mesodermal cell fate commitment;osteoblast fate commitment;transcription, DNA-dependent;regulation of transcription, DNA-dependent;regulation of transcription from RNA polymerase II promoter;protein phosphorylation;transforming growth factor beta receptor signaling pathway;SMAD protein complex assembly;gamete generation;negative regulation of cell proliferation;positive regulation …	intracellular;nucleus;nuclear inner membrane;transcription factor complex;cytoplasm	RNA polymerase II core promoter sequence-specific DNA binding;sequence-specific DNA binding transcription factor activity;protein binding;protein kinase binding;identical protein binding;co-SMAD binding;I-SMAD binding	713214	11678.6
Supt6h	false	true	false	nucleobase-containing compound metabolic process;transcription, DNA-dependent;regulation of transcription, DNA-dependent;regulation of transcription from RNA polymerase II promoter;regulation of transcription elongation, DNA-dependent	nucleus	RNA binding;hydrolase activity, acting on ester bonds	451884	11600.2
Tceb3	true	false	false	transcription, DNA-dependent;regulation of transcription, DNA-dependent;regulation of transcription from RNA polymerase II promoter;transcription elongation from RNA polymerase II promoter	nucleus;transcription elongation factor complex;integral to membrane	DNA binding	211607	11575.9
Akna	true	false	false	transcription, DNA-dependent;regulation of transcription, DNA-dependent;biological_process	cellular_component;nucleus	molecular_function;DNA binding	420363	11574.5
Actr8	false	true	false	DNA repair;DNA recombination;transcription, DNA-dependent;regulation of transcription, DNA-dependent;response to DNA damage stimulus;cell cycle;mitosis;biological_process;cell division	nucleus;chromosome;Ino80 complex	molecular_function	170461	11451.8
Actr8	false	false	true	DNA repair;DNA recombination;transcription, DNA-dependent;regulation of transcription, DNA-dependent;response to DNA damage stimulus;cell cycle;mitosis;biological_process;cell division	nucleus;chromosome;Ino80 complex	molecular_function	170461	11451.8
Actr8	false	false	true	DNA repair;DNA recombination;transcription, DNA-dependent;regulation of transcription, DNA-dependent;response to DNA damage stimulus;cell cycle;mitosis;biological_process;cell division	nucleus;chromosome;Ino80 complex	molecular_function	170461	11451.8
Actr8	true	false	false	DNA repair;DNA recombination;transcription, DNA-dependent;regulation of transcription, DNA-dependent;response to DNA damage stimulus;cell cycle;mitosis;biological_process;cell division	nucleus;chromosome;Ino80 complex	molecular_function	170461	11451.8
Fosl1	false	true	false	regulation of transcription, DNA-dependent;negative regulation of cell proliferation;cellular response to extracellular stimulus;positive regulation of apoptotic process;positive regulation of cell cycle;positive regulation of sequence-specific DNA binding transcription factor activity	nucleus;microsome;cytosol;synaptosome;presynaptic membrane	DNA binding;sequence-specific DNA binding transcription factor activity;sequence-specific DNA binding;protein dimerization activity	94028.4	11409.8
Klf6	true	false	false	cytokine-mediated signaling pathway;positive regulation of transcription from RNA polymerase II promoter	nucleus;cytoplasm	DNA binding;double-stranded DNA binding;sequence-specific DNA binding transcription factor activity	125263	14066.6
Klf6	false	false	true	cytokine-mediated signaling pathway;positive regulation of transcription from RNA polymerase II promoter	nucleus;cytoplasm	DNA binding;double-stranded DNA binding;sequence-specific DNA binding transcription factor activity	125263	14066.6
Klf11	false	true	false	regulation of transcription involved in S phase of mitotic cell cycle;negative regulation of transcription from RNA polymerase II promoter;transcription, DNA-dependent;regulation of transcription, DNA-dependent;transcription from RNA polymerase II promoter;apoptotic process;negative regulation of cell proliferation;hemopoiesis;positive regulation of apoptotic process;negative regulation of transc…	intracellular;nucleus	sequence-specific DNA binding RNA polymerase II transcription factor activity;nucleic acid binding;DNA binding;sequence-specific DNA binding transcription factor activity;zinc ion binding;transcription regulatory region DNA binding;metal ion binding	128943	11298.9
Ets1	false	true	false	transcription, DNA-dependent;regulation of transcription, DNA-dependent;regulation of transcription from RNA polymerase II promoter;transcription from RNA polymerase II promoter;induction of apoptosis;positive regulation of cell proliferation;regulation of extracellular matrix disassembly;positive regulation of cell migration;PML body organization;positive regulation of erythrocyte differentiatio…	nucleus;transcription factor complex	DNA binding;sequence-specific DNA binding transcription factor activity;protein binding;sequence-specific DNA binding	693644	11227.8
Ets1	false	false	true	transcription, DNA-dependent;regulation of transcription, DNA-dependent;regulation of transcription from RNA polymerase II promoter;transcription from RNA polymerase II promoter;induction of apoptosis;positive regulation of cell proliferation;regulation of extracellular matrix disassembly;positive regulation of cell migration;PML body organization;positive regulation of erythrocyte differentiatio…	nucleus;transcription factor complex	DNA binding;sequence-specific DNA binding transcription factor activity;protein binding;sequence-specific DNA binding	693644	11227.8
Ets1	false	false	false	transcription, DNA-dependent;regulation of transcription, DNA-dependent;regulation of transcription from RNA polymerase II promoter;transcription from RNA polymerase II promoter;induction of apoptosis;positive regulation of cell proliferation;regulation of extracellular matrix disassembly;positive regulation of cell migration;PML body organization;positive regulation of erythrocyte differentiatio…	nucleus;transcription factor complex	DNA binding;sequence-specific DNA binding transcription factor activity;protein binding;sequence-specific DNA binding	693644	11227.8
Bahd1	true	false	false	transcription, DNA-dependent;regulation of transcription, DNA-dependent;chromatin modification;heterochromatin assembly;negative regulation of transcription, DNA-dependent	nucleus;chromatin silencing complex;chromosome	DNA binding;chromatin binding	256747	11206.8
Bahd1	false	true	false	transcription, DNA-dependent;regulation of transcription, DNA-dependent;chromatin modification;heterochromatin assembly;negative regulation of transcription, DNA-dependent	nucleus;chromatin silencing complex;chromosome	DNA binding;chromatin binding	256747	11206.8
Commd7	true	false	false	negative regulation of NF-kappaB transcription factor activity;tumor necrosis factor-mediated signaling pathway;negative regulation of transcription, DNA-dependent	cellular_component	NF-kappaB binding	176083	11107.9
Commd7	true	false	false	negative regulation of NF-kappaB transcription factor activity;tumor necrosis factor-mediated signaling pathway;negative regulation of transcription, DNA-dependent	cellular_component	NF-kappaB binding	176083	11107.9
Commd7	false	true	false	negative regulation of NF-kappaB transcription factor activity;tumor necrosis factor-mediated signaling pathway;negative regulation of transcription, DNA-dependent	cellular_component	NF-kappaB binding	176083	11107.9
Commd7	true	false	false	negative regulation of NF-kappaB transcription factor activity;tumor necrosis factor-mediated signaling pathway;negative regulation of transcription, DNA-dependent	cellular_component	NF-kappaB binding	176083	11107.9
Max	false	false	false	regulation of transcription, DNA-dependent;protein complex assembly;negative regulation of gene expression	nucleus;cytoplasm;PML body;dendrite;MLL1 complex	DNA binding;sequence-specific DNA binding transcription factor activity;protein complex binding;protein homodimerization activity;sequence-specific DNA binding;protein heterodimerization activity	276682	11076.1
Max	false	false	true	regulation of transcription, DNA-dependent;protein complex assembly;negative regulation of gene expression	nucleus;cytoplasm;PML body;dendrite;MLL1 complex	DNA binding;sequence-specific DNA binding transcription factor activity;protein complex binding;protein homodimerization activity;sequence-specific DNA binding;protein heterodimerization activity	276682	11076.1
Ppard	true	false	false	negative regulation of transcription from RNA polymerase II promoter;placenta development;proteoglycan metabolic process;transcription, DNA-dependent;regulation of transcription, DNA-dependent;regulation of transcription from RNA polymerase II promoter;lipid metabolic process;vitamin A metabolic process;apoptotic process;G-protein coupled receptor signaling pathway;embryo implantation;cell prolif…	nucleus	DNA binding;sequence-specific DNA binding transcription factor activity;steroid hormone receptor activity;transcription coactivator activity;receptor activity;ligand-activated sequence-specific DNA binding RNA polymerase II transcription factor activity;fatty acid binding;enzyme activator activity;drug binding;zinc ion binding;lipid binding;prostacyclin receptor activity;sequence-specific DNA bin…	760658	11069.6
Ppard	true	false	false	negative regulation of transcription from RNA polymerase II promoter;placenta development;proteoglycan metabolic process;transcription, DNA-dependent;regulation of transcription, DNA-dependent;regulation of transcription from RNA polymerase II promoter;lipid metabolic process;vitamin A metabolic process;apoptotic process;G-protein coupled receptor signaling pathway;embryo implantation;cell prolif…	nucleus	DNA binding;sequence-specific DNA binding transcription factor activity;steroid hormone receptor activity;transcription coactivator activity;receptor activity;ligand-activated sequence-specific DNA binding RNA polymerase II transcription factor activity;fatty acid binding;enzyme activator activity;drug binding;zinc ion binding;lipid binding;prostacyclin receptor activity;sequence-specific DNA bin…	760658	11069.6
Ppard	true	false	false	negative regulation of transcription from RNA polymerase II promoter;placenta development;proteoglycan metabolic process;transcription, DNA-dependent;regulation of transcription, DNA-dependent;regulation of transcription from RNA polymerase II promoter;lipid metabolic process;vitamin A metabolic process;apoptotic process;G-protein coupled receptor signaling pathway;embryo implantation;cell prolif…	nucleus	DNA binding;sequence-specific DNA binding transcription factor activity;steroid hormone receptor activity;transcription coactivator activity;receptor activity;ligand-activated sequence-specific DNA binding RNA polymerase II transcription factor activity;fatty acid binding;enzyme activator activity;drug binding;zinc ion binding;lipid binding;prostacyclin receptor activity;sequence-specific DNA bin…	760658	11069.6
Sp3	false	false	false	negative regulation of transcription from RNA polymerase II promoter;ossification;in utero embryonic development;natural killer cell differentiation;trophectodermal cell differentiation;liver development;embryonic placenta development;transcription, DNA-dependent;regulation of transcription, DNA-dependent;B cell differentiation;T cell differentiation;erythrocyte differentiation;megakaryocyte diff…	intracellular;nucleus;transcriptional repressor complex	RNA polymerase II core promoter sequence-specific DNA binding;core promoter proximal region sequence-specific DNA binding;RNA polymerase II core promoter proximal region sequence-specific DNA binding transcription factor activity involved in negative regulation of transcription;nucleic acid binding;DNA binding;chromatin binding;double-stranded DNA binding;sequence-specific DNA binding transcripti…	486449	11052.1
Sp3	false	true	false	negative regulation of transcription from RNA polymerase II promoter;ossification;in utero embryonic development;natural killer cell differentiation;trophectodermal cell differentiation;liver development;embryonic placenta development;transcription, DNA-dependent;regulation of transcription, DNA-dependent;B cell differentiation;T cell differentiation;erythrocyte differentiation;megakaryocyte diff…	intracellular;nucleus;transcriptional repressor complex	RNA polymerase II core promoter sequence-specific DNA binding;core promoter proximal region sequence-specific DNA binding;RNA polymerase II core promoter proximal region sequence-specific DNA binding transcription factor activity involved in negative regulation of transcription;nucleic acid binding;DNA binding;chromatin binding;double-stranded DNA binding;sequence-specific DNA binding transcripti…	486449	11052.1
Sp3	false	false	false	negative regulation of transcription from RNA polymerase II promoter;ossification;in utero embryonic development;natural killer cell differentiation;trophectodermal cell differentiation;liver development;embryonic placenta development;transcription, DNA-dependent;regulation of transcription, DNA-dependent;B cell differentiation;T cell differentiation;erythrocyte differentiation;megakaryocyte diff…	intracellular;nucleus;transcriptional repressor complex	RNA polymerase II core promoter sequence-specific DNA binding;core promoter proximal region sequence-specific DNA binding;RNA polymerase II core promoter proximal region sequence-specific DNA binding transcription factor activity involved in negative regulation of transcription;nucleic acid binding;DNA binding;chromatin binding;double-stranded DNA binding;sequence-specific DNA binding transcripti…	486449	11052.1
Sp3	false	true	false	negative regulation of transcription from RNA polymerase II promoter;ossification;in utero embryonic development;natural killer cell differentiation;trophectodermal cell differentiation;liver development;embryonic placenta development;transcription, DNA-dependent;regulation of transcription, DNA-dependent;B cell differentiation;T cell differentiation;erythrocyte differentiation;megakaryocyte diff…	intracellular;nucleus;transcriptional repressor complex	RNA polymerase II core promoter sequence-specific DNA binding;core promoter proximal region sequence-specific DNA binding;RNA polymerase II core promoter proximal region sequence-specific DNA binding transcription factor activity involved in negative regulation of transcription;nucleic acid binding;DNA binding;chromatin binding;double-stranded DNA binding;sequence-specific DNA binding transcripti…	486449	11052.1
Phf2	true	false	false	transcription, DNA-dependent;regulation of transcription, DNA-dependent;protein demethylation;chromatin modification;histone H3-K9 demethylation;oxidation-reduction process;negative regulation of chromatin silencing at rDNA	nucleus;nucleolus	iron ion binding;zinc ion binding;oxidoreductase activity;oxidoreductase activity, acting on single donors with incorporation of molecular oxygen, incorporation of two atoms of oxygen;histone demethylase activity (H3-K9 specific);methylated histone residue binding;metal ion binding	763617	11045.1
Arid1a	false	false	true	chromatin organization;nucleosome disassembly;chromatin remodeling;transcription, DNA-dependent;regulation of transcription, DNA-dependent;nervous system development;chromatin modification;intracellular estrogen receptor signaling pathway;androgen receptor signaling pathway;glucocorticoid receptor signaling pathway;positive regulation of transcription, DNA-dependent	nuclear chromatin;intracellular;soluble fraction;nucleus;SWI/SNF complex;npBAF complex;nBAF complex	DNA binding;binding;protein binding;ligand-dependent nuclear receptor binding	823983	11044.8
Elf2	false	false	false	transcription, DNA-dependent;regulation of transcription, DNA-dependent;regulation of transcription from RNA polymerase II promoter;negative regulation of transcription, DNA-dependent;positive regulation of transcription, DNA-dependent	nucleus;cytoplasm	DNA binding;sequence-specific DNA binding transcription factor activity;protein binding;sequence-specific DNA binding	769469	10941.9
Hmga1	true	false	false	base-excision repair;spermatogenesis;negative regulation of cell proliferation;senescence-associated heterochromatin focus assembly;negative regulation of transcription, DNA-dependent;positive regulation of transcription, DNA-dependent;positive regulation of transcription from RNA polymerase II promoter;oncogene-induced senescence;positive regulation of cellular senescence	nucleus;senescence-associated heterochromatin focus	RNA polymerase II core promoter proximal region sequence-specific DNA binding transcription factor activity involved in positive regulation of transcription;sequence-specific DNA binding transcription factor activity;DNA-(apurinic or apyrimidinic site) lyase activity;transcription factor binding;enzyme binding;ligand-dependent nuclear receptor transcription coactivator activity;retinoic acid rece…	77352.9	10896.3
Msl3	false	false	false	transcription, DNA-dependent;regulation of transcription, DNA-dependent;chromatin modification;histone H4-K16 acetylation	nucleus;MSL complex	DNA binding;methylated histone residue binding	215270	10880.5
Ern1	false	false	true	transcription, DNA-dependent;regulation of transcription, DNA-dependent;mRNA processing;protein phosphorylation;apoptotic process;induction of apoptosis;response to stress;response to unfolded protein;activation of signaling protein activity involved in unfolded protein response;cell cycle arrest;metabolic process;phosphorylation;endoplasmic reticulum unfolded protein response;protein autophospho…	nuclear inner membrane;endoplasmic reticulum;endoplasmic reticulum membrane;membrane;integral to membrane;integral to endoplasmic reticulum membrane	nucleotide binding;magnesium ion binding;catalytic activity;endonuclease activity;endoribonuclease activity;protein kinase activity;protein serine/threonine kinase activity;ATP binding;kinase activity;transferase activity;transferase activity, transferring phosphorus-containing groups;hydrolase activity;endoribonuclease activity, producing 5'-phosphomonoesters;metal ion binding	974900	10811
Ern1	false	false	true	transcription, DNA-dependent;regulation of transcription, DNA-dependent;mRNA processing;protein phosphorylation;apoptotic process;induction of apoptosis;response to stress;response to unfolded protein;activation of signaling protein activity involved in unfolded protein response;cell cycle arrest;metabolic process;phosphorylation;endoplasmic reticulum unfolded protein response;protein autophospho…	nuclear inner membrane;endoplasmic reticulum;endoplasmic reticulum membrane;membrane;integral to membrane;integral to endoplasmic reticulum membrane	nucleotide binding;magnesium ion binding;catalytic activity;endonuclease activity;endoribonuclease activity;protein kinase activity;protein serine/threonine kinase activity;ATP binding;kinase activity;transferase activity;transferase activity, transferring phosphorus-containing groups;hydrolase activity;endoribonuclease activity, producing 5'-phosphomonoesters;metal ion binding	974900	10811
Tcf7l2	true	false	false	negative regulation of transcription from RNA polymerase II promoter;blood vessel development;transcription, DNA-dependent;regulation of transcription, DNA-dependent;regulation of transcription from RNA polymerase II promoter;anti-apoptosis;cell cycle arrest;cell proliferation;response to glucose stimulus;positive regulation of heparan sulfate proteoglycan biosynthetic process;oligodendrocyte dev…	nucleus;nucleoplasm;transcription factor complex;cytosol;protein-DNA complex;beta-catenin-TCF7L2 complex	DNA binding;chromatin binding;sequence-specific DNA binding transcription factor activity;protein binding;beta-catenin binding;transcription factor binding;protein kinase binding;nuclear hormone receptor binding;sequence-specific DNA binding;transcription regulatory region DNA binding;gamma-catenin binding;armadillo repeat domain binding	2.07124e+06	10796.3
Tcf7l2	false	false	false	negative regulation of transcription from RNA polymerase II promoter;blood vessel development;transcription, DNA-dependent;regulation of transcription, DNA-dependent;regulation of transcription from RNA polymerase II promoter;anti-apoptosis;cell cycle arrest;cell proliferation;response to glucose stimulus;positive regulation of heparan sulfate proteoglycan biosynthetic process;oligodendrocyte dev…	nucleus;nucleoplasm;transcription factor complex;cytosol;protein-DNA complex;beta-catenin-TCF7L2 complex	DNA binding;chromatin binding;sequence-specific DNA binding transcription factor activity;protein binding;beta-catenin binding;transcription factor binding;protein kinase binding;nuclear hormone receptor binding;sequence-specific DNA binding;transcription regulatory region DNA binding;gamma-catenin binding;armadillo repeat domain binding	2.07124e+06	10796.3
Tcf7l2	false	false	true	negative regulation of transcription from RNA polymerase II promoter;blood vessel development;transcription, DNA-dependent;regulation of transcription, DNA-dependent;regulation of transcription from RNA polymerase II promoter;anti-apoptosis;cell cycle arrest;cell proliferation;response to glucose stimulus;positive regulation of heparan sulfate proteoglycan biosynthetic process;oligodendrocyte dev…	nucleus;nucleoplasm;transcription factor complex;cytosol;protein-DNA complex;beta-catenin-TCF7L2 complex	DNA binding;chromatin binding;sequence-specific DNA binding transcription factor activity;protein binding;beta-catenin binding;transcription factor binding;protein kinase binding;nuclear hormone receptor binding;sequence-specific DNA binding;transcription regulatory region DNA binding;gamma-catenin binding;armadillo repeat domain binding	2.07124e+06	10796.3
Tcf7l2	false	true	false	negative regulation of transcription from RNA polymerase II promoter;blood vessel development;transcription, DNA-dependent;regulation of transcription, DNA-dependent;regulation of transcription from RNA polymerase II promoter;anti-apoptosis;cell cycle arrest;cell proliferation;response to glucose stimulus;positive regulation of heparan sulfate proteoglycan biosynthetic process;oligodendrocyte dev…	nucleus;nucleoplasm;transcription factor complex;cytosol;protein-DNA complex;beta-catenin-TCF7L2 complex	DNA binding;chromatin binding;sequence-specific DNA binding transcription factor activity;protein binding;beta-catenin binding;transcription factor binding;protein kinase binding;nuclear hormone receptor binding;sequence-specific DNA binding;transcription regulatory region DNA binding;gamma-catenin binding;armadillo repeat domain binding	2.07124e+06	10796.3
Crtc3	false	false	true	transcription, DNA-dependent;regulation of transcription, DNA-dependent;biological_process	nucleus;cytoplasm	molecular_function	1.09712e+06	10730.2
Crtc3	false	false	true	transcription, DNA-dependent;regulation of transcription, DNA-dependent;biological_process	nucleus;cytoplasm	molecular_function	1.09712e+06	10730.2
Tcf21	true	false	false	negative regulation of transcription from RNA polymerase II promoter;ureteric bud development;branching involved in ureteric bud morphogenesis;morphogenesis of a branching structure;kidney development;vasculature development;transcription, DNA-dependent;regulation of transcription, DNA-dependent;sex determination;sex differentiation;organ morphogenesis;branchiomeric skeletal muscle development;ep…	nucleus	RNA polymerase II core promoter proximal region sequence-specific DNA binding transcription factor activity involved in positive regulation of transcription;RNA polymerase II core promoter proximal region sequence-specific DNA binding transcription factor activity involved in negative regulation of transcription;DNA binding;protein binding;histone deacetylase binding;bHLH transcription factor bin…	30632.8	10725.8
Snai1	true	false	false	negative regulation of transcription from RNA polymerase II promoter;mesoderm formation;epithelial to mesenchymal transition;regulation of transcription from RNA polymerase II promoter;multicellular organismal development;mesoderm development;positive regulation of epithelial to mesenchymal transition;negative regulation of vitamin D biosynthetic process;cell migration;positive regulation of cell…	intracellular;nucleus;cytoplasm	RNA polymerase II core promoter proximal region sequence-specific DNA binding transcription factor activity involved in negative regulation of transcription;nucleic acid binding;DNA binding;zinc ion binding;kinase binding;sequence-specific DNA binding;metal ion binding	49108.5	10710.7
Snai1	true	false	false	negative regulation of transcription from RNA polymerase II promoter;mesoderm formation;epithelial to mesenchymal transition;regulation of transcription from RNA polymerase II promoter;multicellular organismal development;mesoderm development;positive regulation of epithelial to mesenchymal transition;negative regulation of vitamin D biosynthetic process;cell migration;positive regulation of cell…	intracellular;nucleus;cytoplasm	RNA polymerase II core promoter proximal region sequence-specific DNA binding transcription factor activity involved in negative regulation of transcription;nucleic acid binding;DNA binding;zinc ion binding;kinase binding;sequence-specific DNA binding;metal ion binding	49108.5	10710.7
Med23	false	true	false	transcription, DNA-dependent;regulation of transcription, DNA-dependent	nucleus;transcription factor complex;mediator complex		463729	10649.7
Ccnt1	false	true	false	regulation of cyclin-dependent protein kinase activity;transcription, DNA-dependent;regulation of transcription, DNA-dependent;protein phosphorylation;cell cycle;cell division	nucleus;nucleolus;positive transcription elongation factor complex b	DNA binding;chromatin binding;protein binding;snRNA binding;protein kinase binding;transcription regulatory region DNA binding	259925	10641.3
Gtf2e1	true	false	false	transcription, DNA-dependent;regulation of transcription, DNA-dependent;transcription initiation from RNA polymerase II promoter	nucleus	molecular_function;zinc ion binding;sequence-specific DNA binding;metal ion binding	316177	10548.4
Tbx2	true	false	false	negative regulation of transcription from RNA polymerase II promoter;heart morphogenesis;transcription, DNA-dependent;regulation of transcription, DNA-dependent;multicellular organismal development;muscle cell fate determination;cell aging;positive regulation of cell proliferation;negative regulation of transcription, DNA-dependent;cardiac muscle tissue development;palate development;developmenta…	nucleus;transcription factor complex	DNA binding;sequence-specific DNA binding transcription factor activity;protein binding;sequence-specific DNA binding	98122.2	10512.3
Med10	false	false	false	transcription, DNA-dependent;regulation of transcription, DNA-dependent;regulation of transcription from RNA polymerase II promoter;positive regulation of transcription from RNA polymerase II promoter	nucleus;mediator complex	RNA polymerase II transcription cofactor activity;molecular_function	65236.4	10500
Gabpb2	false	false	true	transcription, DNA-dependent;regulation of transcription, DNA-dependent;positive regulation of transcription from RNA polymerase II promoter	nucleus	protein homodimerization activity;transcription regulatory region DNA binding;protein heterodimerization activity	379212	10482.7
Klf4	true	false	false	negative regulation of transcription from RNA polymerase II promoter;transcription, DNA-dependent;regulation of transcription, DNA-dependent;regulation of transcription from RNA polymerase II promoter;transcription from RNA polymerase II promoter;negative regulation of cell proliferation;epidermal cell differentiation;negative regulation of phosphatidylinositol 3-kinase cascade;negative regulatio…	chromatin;nuclear chromatin;intracellular;nucleus;transcription factor complex	core promoter proximal region sequence-specific DNA binding;sequence-specific DNA binding transcription factor recruiting transcription factor activity;RNA polymerase II core promoter proximal region sequence-specific DNA binding transcription factor activity involved in positive regulation of transcription;RNA polymerase II transcription factor binding;RNA polymerase II transcription factor bind…	55955.7	10480.6
Klf4	false	false	false	negative regulation of transcription from RNA polymerase II promoter;transcription, DNA-dependent;regulation of transcription, DNA-dependent;regulation of transcription from RNA polymerase II promoter;transcription from RNA polymerase II promoter;negative regulation of cell proliferation;epidermal cell differentiation;negative regulation of phosphatidylinositol 3-kinase cascade;negative regulatio…	chromatin;nuclear chromatin;intracellular;nucleus;transcription factor complex	core promoter proximal region sequence-specific DNA binding;sequence-specific DNA binding transcription factor recruiting transcription factor activity;RNA polymerase II core promoter proximal region sequence-specific DNA binding transcription factor activity involved in positive regulation of transcription;RNA polymerase II transcription factor binding;RNA polymerase II transcription factor bind…	55955.7	10480.6
Klf4	false	false	true	negative regulation of transcription from RNA polymerase II promoter;transcription, DNA-dependent;regulation of transcription, DNA-dependent;regulation of transcription from RNA polymerase II promoter;transcription from RNA polymerase II promoter;negative regulation of cell proliferation;epidermal cell differentiation;negative regulation of phosphatidylinositol 3-kinase cascade;negative regulatio…	chromatin;nuclear chromatin;intracellular;nucleus;transcription factor complex	core promoter proximal region sequence-specific DNA binding;sequence-specific DNA binding transcription factor recruiting transcription factor activity;RNA polymerase II core promoter proximal region sequence-specific DNA binding transcription factor activity involved in positive regulation of transcription;RNA polymerase II transcription factor binding;RNA polymerase II transcription factor bind…	55955.7	10480.6
Klf4	false	true	false	negative regulation of transcription from RNA polymerase II promoter;transcription, DNA-dependent;regulation of transcription, DNA-dependent;regulation of transcription from RNA polymerase II promoter;transcription from RNA polymerase II promoter;negative regulation of cell proliferation;epidermal cell differentiation;negative regulation of phosphatidylinositol 3-kinase cascade;negative regulatio…	chromatin;nuclear chromatin;intracellular;nucleus;transcription factor complex	core promoter proximal region sequence-specific DNA binding;sequence-specific DNA binding transcription factor recruiting transcription factor activity;RNA polymerase II core promoter proximal region sequence-specific DNA binding transcription factor activity involved in positive regulation of transcription;RNA polymerase II transcription factor binding;RNA polymerase II transcription factor bind…	55955.7	10480.6
Yap1	true	false	false	vasculogenesis;embryonic heart tube morphogenesis;transcription, DNA-dependent;regulation of transcription, DNA-dependent;regulation of transcription from RNA polymerase II promoter;response to DNA damage stimulus;cell proliferation;positive regulation of cell proliferation;regulation of keratinocyte proliferation;keratinocyte differentiation;negative regulation of epithelial cell differentiation…	nucleus;transcription factor complex;cytoplasm	RNA polymerase II transcription factor binding transcription factor activity;chromatin binding;transcription coactivator activity;transcription corepressor activity;protein binding;transcription regulatory region DNA binding;proline-rich region binding	759094	10456.4
Sfpi1	true	false	false	vasculature development;lymphoid progenitor cell differentiation;myeloid leukocyte differentiation;transcription, DNA-dependent;regulation of transcription, DNA-dependent;regulation of transcription from RNA polymerase II promoter;induction of apoptosis;lymphocyte differentiation;erythrocyte differentiation;macrophage differentiation;granulocyte differentiation;somatic stem cell maintenance;myelo…	nuclear chromatin;nucleus;transcription factor complex	core promoter binding;RNA polymerase II transcription factor binding;DNA binding;sequence-specific DNA binding transcription factor activity;RNA binding;protein binding;sequence-specific DNA binding	197423	10412.6
Phf12	false	true	false	transcription, DNA-dependent;regulation of transcription, DNA-dependent;negative regulation of transcription, DNA-dependent	nucleus;transcriptional repressor complex	zinc ion binding;phosphatidylinositol binding;metal ion binding	496337	10401
Tada1	false	true	false	transcription, DNA-dependent;regulation of transcription, DNA-dependent;histone H3 acetylation;regulation of RNA biosynthetic process	nucleus;STAGA complex	transcription coactivator activity	149950	10374.3
Tada1	true	false	false	transcription, DNA-dependent;regulation of transcription, DNA-dependent;histone H3 acetylation;regulation of RNA biosynthetic process	nucleus;STAGA complex	transcription coactivator activity	149950	10374.3
Tada1	false	false	true	transcription, DNA-dependent;regulation of transcription, DNA-dependent;histone H3 acetylation;regulation of RNA biosynthetic process	nucleus;STAGA complex	transcription coactivator activity	149950	10374.3
Lbx2	true	false	false	transcription, DNA-dependent;regulation of transcription, DNA-dependent;biological_process	cellular_component;nucleus	transcription regulatory region sequence-specific DNA binding;molecular_function;DNA binding;sequence-specific DNA binding transcription factor activity;sequence-specific DNA binding	19248.3	10254.8
Med9	true	false	false	transcription, DNA-dependent;regulation of transcription, DNA-dependent;regulation of transcription from RNA polymerase II promoter;biological_process	nucleus;mediator complex	RNA polymerase II transcription cofactor activity;protein binding	152891	10129.9
Nsd1	true	false	false	gastrulation with mouth forming second;regulation of transcription, DNA-dependent;histone H3-K36 methylation;peptidyl-lysine methylation;methylation;positive regulation of transcription, DNA-dependent;regulation of RNA biosynthetic process	nucleus	chromatin binding;transcription cofactor activity;protein binding;methyltransferase activity;zinc ion binding;transferase activity;histone methyltransferase activity;metal ion binding;histone methyltransferase activity (H3-K36 specific);androgen receptor binding	1.09245e+06	10064.6
Zbtb1	false	true	false	transcription, DNA-dependent;regulation of transcription, DNA-dependent;biological_process	cellular_component;intracellular;nucleus	nucleic acid binding;DNA binding;protein binding;zinc ion binding;metal ion binding	184923	10005.6
Gmeb2	true	false	false	transcription, DNA-dependent;regulation of transcription, DNA-dependent;biological_process	nucleus;cytoplasm	molecular_function;DNA binding;binding;metal ion binding	362874	9937.39
Cbfa2t3	true	false	false	transcription, DNA-dependent;regulation of transcription, DNA-dependent;cell differentiation;granulocyte differentiation;positive regulation of transcription from RNA polymerase II promoter	intracellular;nucleus;Golgi apparatus;membrane	chromatin binding;sequence-specific DNA binding transcription factor activity;protein binding;zinc ion binding;metal ion binding	730794	9879.06
Cbfa2t3	false	true	false	transcription, DNA-dependent;regulation of transcription, DNA-dependent;cell differentiation;granulocyte differentiation;positive regulation of transcription from RNA polymerase II promoter	intracellular;nucleus;Golgi apparatus;membrane	chromatin binding;sequence-specific DNA binding transcription factor activity;protein binding;zinc ion binding;metal ion binding	730794	9879.06
Ahctf1	false	false	true	cytokinesis;transcription, DNA-dependent;regulation of transcription, DNA-dependent;transport;cell cycle;mitosis;multicellular organismal development;protein transport;hemopoiesis;positive regulation of transcription, DNA-dependent;mRNA transport;nuclear pore complex assembly;cell division	chromosome, centromeric region;kinetochore;nucleus;nuclear pore;chromosome;cytoplasm;nuclear matrix;nuclear membrane	DNA binding;sequence-specific DNA binding transcription factor activity	582490	9854.01
Zfp592	true	false	false	transcription, DNA-dependent;regulation of transcription, DNA-dependent;biological_process	cellular_component;intracellular;nucleus	DNA binding;protein binding;zinc ion binding;metal ion binding	505431	9818.2
Notch2	true	false	false	cell fate determination;morphogenesis of an epithelial sheet;inflammatory response to antigenic stimulus;transcription, DNA-dependent;regulation of transcription, DNA-dependent;humoral immune response;cell cycle arrest;Notch signaling pathway;multicellular organismal development;determination of left/right symmetry;negative regulation of cell proliferation;organ morphogenesis;cell growth;cell dif…	cell;nucleus;plasma membrane;integral to plasma membrane;cell surface;membrane;integral to membrane	receptor activity;calcium ion binding;protein binding;NF-kappaB binding	1.33773e+06	9776.57
Notch2	false	true	false	cell fate determination;morphogenesis of an epithelial sheet;inflammatory response to antigenic stimulus;transcription, DNA-dependent;regulation of transcription, DNA-dependent;humoral immune response;cell cycle arrest;Notch signaling pathway;multicellular organismal development;determination of left/right symmetry;negative regulation of cell proliferation;organ morphogenesis;cell growth;cell dif…	cell;nucleus;plasma membrane;integral to plasma membrane;cell surface;membrane;integral to membrane	receptor activity;calcium ion binding;protein binding;NF-kappaB binding	1.33773e+06	9776.57
Notch2	false	false	true	cell fate determination;morphogenesis of an epithelial sheet;inflammatory response to antigenic stimulus;transcription, DNA-dependent;regulation of transcription, DNA-dependent;humoral immune response;cell cycle arrest;Notch signaling pathway;multicellular organismal development;determination of left/right symmetry;negative regulation of cell proliferation;organ morphogenesis;cell growth;cell dif…	cell;nucleus;plasma membrane;integral to plasma membrane;cell surface;membrane;integral to membrane	receptor activity;calcium ion binding;protein binding;NF-kappaB binding	1.33773e+06	9776.57
Notch2	false	false	false	cell fate determination;morphogenesis of an epithelial sheet;inflammatory response to antigenic stimulus;transcription, DNA-dependent;regulation of transcription, DNA-dependent;humoral immune response;cell cycle arrest;Notch signaling pathway;multicellular organismal development;determination of left/right symmetry;negative regulation of cell proliferation;organ morphogenesis;cell growth;cell dif…	cell;nucleus;plasma membrane;integral to plasma membrane;cell surface;membrane;integral to membrane	receptor activity;calcium ion binding;protein binding;NF-kappaB binding	1.33773e+06	9776.57
Nr4a1	true	false	false	positive regulation of endothelial cell proliferation;cell migration involved in sprouting angiogenesis;transcription, DNA-dependent;regulation of transcription, DNA-dependent;regulation of transcription from RNA polymerase II promoter;apoptotic process;induction of apoptosis;response to inorganic substance;endothelial cell chemotaxis;cellular response to vascular endothelial growth factor stimul…	nucleus;transcription factor complex	RNA polymerase II core promoter proximal region sequence-specific DNA binding transcription factor activity involved in positive regulation of transcription;DNA binding;sequence-specific DNA binding transcription factor activity;steroid hormone receptor activity;receptor activity;ligand-activated sequence-specific DNA binding RNA polymerase II transcription factor activity;protein binding;zinc io…	77638.8	9767.12
Habp4	false	false	true	transcription, DNA-dependent;regulation of transcription, DNA-dependent;hyaluronan metabolic process;negative regulation of DNA binding;cellular response to mechanical stimulus	nucleus;cytoplasm;sarcomere	hyaluronic acid binding	240619	9752.72
Habp4	false	true	false	transcription, DNA-dependent;regulation of transcription, DNA-dependent;hyaluronan metabolic process;negative regulation of DNA binding;cellular response to mechanical stimulus	nucleus;cytoplasm;sarcomere	hyaluronic acid binding	240619	9752.72
Trim27	true	false	false	negative regulation of transcription from RNA polymerase II promoter;transcription, DNA-dependent;regulation of transcription, DNA-dependent;negative regulation of gene expression, epigenetic;protein trimerization	intracellular;nucleus;nucleoplasm;cytoplasm;nuclear membrane	DNA binding;protein binding;zinc ion binding;metal ion binding	125738	9747.86
Ercc3	true	false	false	cell cycle checkpoint;nucleotide-excision repair, DNA duplex unwinding;ATP catabolic process;DNA topological change;DNA repair;transcription-coupled nucleotide-excision repair;nucleotide-excision repair;transcription, DNA-dependent;regulation of transcription, DNA-dependent;transcription from RNA polymerase II promoter;protein phosphorylation;induction of apoptosis;response to DNA damage stimulus…	SSL2-core TFIIH complex;nucleus;holo TFIIH complex	nucleotide binding;nucleic acid binding;DNA binding;ATP-dependent DNA helicase activity;helicase activity;ATP binding;GTP binding;protein C-terminus binding;RNA polymerase II carboxy-terminal domain kinase activity;hydrolase activity;ATPase activity;dATP binding;peptide binding;3'-5' DNA helicase activity;protein N-terminus binding	288744	9683.86
Mtf1	false	true	false	transcription, DNA-dependent;regulation of transcription, DNA-dependent;response to oxidative stress;positive regulation of transcription, DNA-dependent;positive regulation of transcription from RNA polymerase II promoter;response to cadmium ion	intracellular;nucleus	RNA polymerase II core promoter sequence-specific DNA binding;core promoter binding;nucleic acid binding;DNA binding;sequence-specific DNA binding transcription factor activity;zinc ion binding;histone acetyltransferase binding;metal ion binding	452454	9575.35
Mtf1	false	false	false	transcription, DNA-dependent;regulation of transcription, DNA-dependent;response to oxidative stress;positive regulation of transcription, DNA-dependent;positive regulation of transcription from RNA polymerase II promoter;response to cadmium ion	intracellular;nucleus	RNA polymerase II core promoter sequence-specific DNA binding;core promoter binding;nucleic acid binding;DNA binding;sequence-specific DNA binding transcription factor activity;zinc ion binding;histone acetyltransferase binding;metal ion binding	452454	9575.35
Hsf4	true	false	false	negative regulation of transcription from RNA polymerase II promoter;eye development;transcription, DNA-dependent;regulation of transcription, DNA-dependent;response to stress;positive regulation of cell proliferation;histone H3-K9 demethylation;camera-type eye development;positive regulation of cell differentiation;positive regulation of transcription from RNA polymerase II promoter;cell develop…	nucleus	DNA binding;sequence-specific DNA binding transcription factor activity;sequence-specific DNA binding	57179.4	9574.59
Mycl1	false	true	false	regulation of transcription, DNA-dependent	nucleus	DNA binding;sequence-specific DNA binding transcription factor activity;protein binding	60530.2	9484.52
Per3	false	false	false	negative regulation of transcription from RNA polymerase II promoter;transcription, DNA-dependent;regulation of transcription, DNA-dependent;signal transduction;circadian rhythm;rhythmic process	nucleus;cytoplasm	signal transducer activity;protein binding	387665	9462.63
Gtf2ird1	false	false	false	transcription, DNA-dependent;regulation of transcription, DNA-dependent;multicellular organismal development;embryo development	nucleus;cytoplasm	DNA binding;sequence-specific DNA binding transcription factor activity	934520	9434.73
Smarca2	true	false	false	chromatin organization;nucleosome assembly;transcription, DNA-dependent;regulation of transcription, DNA-dependent;nervous system development;negative regulation of cell proliferation;negative regulation of cell growth;aortic smooth muscle cell differentiation;negative regulation of transcription, DNA-dependent;positive regulation of transcription, DNA-dependent;positive regulation of transcripti…	nuclear chromatin;nucleus;SWI/SNF complex;intracellular membrane-bounded organelle;intermediate filament cytoskeleton;npBAF complex;nBAF complex;WINAC complex	nucleotide binding;RNA polymerase II transcription coactivator activity;nucleic acid binding;DNA binding;helicase activity;protein binding;ATP binding;hydrolase activity;hydrolase activity, acting on acid anhydrides;hydrolase activity, acting on acid anhydrides, in phosphorus-containing anhydrides;transcription regulatory region DNA binding	1.62654e+06	9393.17
Smarca2	true	false	false	chromatin organization;nucleosome assembly;transcription, DNA-dependent;regulation of transcription, DNA-dependent;nervous system development;negative regulation of cell proliferation;negative regulation of cell growth;aortic smooth muscle cell differentiation;negative regulation of transcription, DNA-dependent;positive regulation of transcription, DNA-dependent;positive regulation of transcripti…	nuclear chromatin;nucleus;SWI/SNF complex;intracellular membrane-bounded organelle;intermediate filament cytoskeleton;npBAF complex;nBAF complex;WINAC complex	nucleotide binding;RNA polymerase II transcription coactivator activity;nucleic acid binding;DNA binding;helicase activity;protein binding;ATP binding;hydrolase activity;hydrolase activity, acting on acid anhydrides;hydrolase activity, acting on acid anhydrides, in phosphorus-containing anhydrides;transcription regulatory region DNA binding	1.62654e+06	9393.17
Smarca2	true	false	false	chromatin organization;nucleosome assembly;transcription, DNA-dependent;regulation of transcription, DNA-dependent;nervous system development;negative regulation of cell proliferation;negative regulation of cell growth;aortic smooth muscle cell differentiation;negative regulation of transcription, DNA-dependent;positive regulation of transcription, DNA-dependent;positive regulation of transcripti…	nuclear chromatin;nucleus;SWI/SNF complex;intracellular membrane-bounded organelle;intermediate filament cytoskeleton;npBAF complex;nBAF complex;WINAC complex	nucleotide binding;RNA polymerase II transcription coactivator activity;nucleic acid binding;DNA binding;helicase activity;protein binding;ATP binding;hydrolase activity;hydrolase activity, acting on acid anhydrides;hydrolase activity, acting on acid anhydrides, in phosphorus-containing anhydrides;transcription regulatory region DNA binding	1.62654e+06	9393.17
Smarca2	false	true	false	chromatin organization;nucleosome assembly;transcription, DNA-dependent;regulation of transcription, DNA-dependent;nervous system development;negative regulation of cell proliferation;negative regulation of cell growth;aortic smooth muscle cell differentiation;negative regulation of transcription, DNA-dependent;positive regulation of transcription, DNA-dependent;positive regulation of transcripti…	nuclear chromatin;nucleus;SWI/SNF complex;intracellular membrane-bounded organelle;intermediate filament cytoskeleton;npBAF complex;nBAF complex;WINAC complex	nucleotide binding;RNA polymerase II transcription coactivator activity;nucleic acid binding;DNA binding;helicase activity;protein binding;ATP binding;hydrolase activity;hydrolase activity, acting on acid anhydrides;hydrolase activity, acting on acid anhydrides, in phosphorus-containing anhydrides;transcription regulatory region DNA binding	1.62654e+06	9393.17
Smarca2	false	false	false	chromatin organization;nucleosome assembly;transcription, DNA-dependent;regulation of transcription, DNA-dependent;nervous system development;negative regulation of cell proliferation;negative regulation of cell growth;aortic smooth muscle cell differentiation;negative regulation of transcription, DNA-dependent;positive regulation of transcription, DNA-dependent;positive regulation of transcripti…	nuclear chromatin;nucleus;SWI/SNF complex;intracellular membrane-bounded organelle;intermediate filament cytoskeleton;npBAF complex;nBAF complex;WINAC complex	nucleotide binding;RNA polymerase II transcription coactivator activity;nucleic acid binding;DNA binding;helicase activity;protein binding;ATP binding;hydrolase activity;hydrolase activity, acting on acid anhydrides;hydrolase activity, acting on acid anhydrides, in phosphorus-containing anhydrides;transcription regulatory region DNA binding	1.62654e+06	9393.17
Smarca2	false	false	true	chromatin organization;nucleosome assembly;transcription, DNA-dependent;regulation of transcription, DNA-dependent;nervous system development;negative regulation of cell proliferation;negative regulation of cell growth;aortic smooth muscle cell differentiation;negative regulation of transcription, DNA-dependent;positive regulation of transcription, DNA-dependent;positive regulation of transcripti…	nuclear chromatin;nucleus;SWI/SNF complex;intracellular membrane-bounded organelle;intermediate filament cytoskeleton;npBAF complex;nBAF complex;WINAC complex	nucleotide binding;RNA polymerase II transcription coactivator activity;nucleic acid binding;DNA binding;helicase activity;protein binding;ATP binding;hydrolase activity;hydrolase activity, acting on acid anhydrides;hydrolase activity, acting on acid anhydrides, in phosphorus-containing anhydrides;transcription regulatory region DNA binding	1.62654e+06	9393.17
Smarca2	false	false	true	chromatin organization;nucleosome assembly;transcription, DNA-dependent;regulation of transcription, DNA-dependent;nervous system development;negative regulation of cell proliferation;negative regulation of cell growth;aortic smooth muscle cell differentiation;negative regulation of transcription, DNA-dependent;positive regulation of transcription, DNA-dependent;positive regulation of transcripti…	nuclear chromatin;nucleus;SWI/SNF complex;intracellular membrane-bounded organelle;intermediate filament cytoskeleton;npBAF complex;nBAF complex;WINAC complex	nucleotide binding;RNA polymerase II transcription coactivator activity;nucleic acid binding;DNA binding;helicase activity;protein binding;ATP binding;hydrolase activity;hydrolase activity, acting on acid anhydrides;hydrolase activity, acting on acid anhydrides, in phosphorus-containing anhydrides;transcription regulatory region DNA binding	1.62654e+06	9393.17
Smarca2	true	false	false	chromatin organization;nucleosome assembly;transcription, DNA-dependent;regulation of transcription, DNA-dependent;nervous system development;negative regulation of cell proliferation;negative regulation of cell growth;aortic smooth muscle cell differentiation;negative regulation of transcription, DNA-dependent;positive regulation of transcription, DNA-dependent;positive regulation of transcripti…	nuclear chromatin;nucleus;SWI/SNF complex;intracellular membrane-bounded organelle;intermediate filament cytoskeleton;npBAF complex;nBAF complex;WINAC complex	nucleotide binding;RNA polymerase II transcription coactivator activity;nucleic acid binding;DNA binding;helicase activity;protein binding;ATP binding;hydrolase activity;hydrolase activity, acting on acid anhydrides;hydrolase activity, acting on acid anhydrides, in phosphorus-containing anhydrides;transcription regulatory region DNA binding	1.62654e+06	9393.17
Smarca2	true	false	false	chromatin organization;nucleosome assembly;transcription, DNA-dependent;regulation of transcription, DNA-dependent;nervous system development;negative regulation of cell proliferation;negative regulation of cell growth;aortic smooth muscle cell differentiation;negative regulation of transcription, DNA-dependent;positive regulation of transcription, DNA-dependent;positive regulation of transcripti…	nuclear chromatin;nucleus;SWI/SNF complex;intracellular membrane-bounded organelle;intermediate filament cytoskeleton;npBAF complex;nBAF complex;WINAC complex	nucleotide binding;RNA polymerase II transcription coactivator activity;nucleic acid binding;DNA binding;helicase activity;protein binding;ATP binding;hydrolase activity;hydrolase activity, acting on acid anhydrides;hydrolase activity, acting on acid anhydrides, in phosphorus-containing anhydrides;transcription regulatory region DNA binding	1.62654e+06	9393.17
Parp14	false	false	false	transcription, DNA-dependent;regulation of transcription, DNA-dependent	nucleus;cytoplasm;plasma membrane	nucleotide binding;nucleic acid binding;NAD+ ADP-ribosyltransferase activity;protein binding;transferase activity;transferase activity, transferring glycosyl groups	360074	9351.35
Parp14	false	true	false	transcription, DNA-dependent;regulation of transcription, DNA-dependent	nucleus;cytoplasm;plasma membrane	nucleotide binding;nucleic acid binding;NAD+ ADP-ribosyltransferase activity;protein binding;transferase activity;transferase activity, transferring glycosyl groups	360074	9351.35
Kdm2a	false	false	true	transcription, DNA-dependent;regulation of transcription, DNA-dependent;biological_process;chromatin modification;oxidation-reduction process;histone H3-K36 demethylation	cellular_component;nucleus	molecular_function;DNA binding;zinc ion binding;oxidoreductase activity;oxidoreductase activity, acting on single donors with incorporation of molecular oxygen, incorporation of two atoms of oxygen;metal ion binding;histone demethylase activity (H3-K36 specific)	756523	9347.75
Ssbp3	false	true	false	transcription, DNA-dependent;regulation of transcription, DNA-dependent;protein complex assembly;positive regulation of cell proliferation;prechordal plate formation;midbrain-hindbrain boundary initiation;negative regulation of apoptotic process;positive regulation of transcription, DNA-dependent;positive regulation of transcription from RNA polymerase II promoter;head development;head morphogene…	nucleus;protein complex	DNA binding;single-stranded DNA binding;protein binding	1.292e+06	9347.07
Pcgf1	true	false	false	transcription, DNA-dependent;regulation of transcription, DNA-dependent;histone H2A monoubiquitination	nucleus;PcG protein complex	protein C-terminus binding;zinc ion binding;metal ion binding	22814.4	9251.57
Pcgf1	false	true	false	transcription, DNA-dependent;regulation of transcription, DNA-dependent;histone H2A monoubiquitination	nucleus;PcG protein complex	protein C-terminus binding;zinc ion binding;metal ion binding	22814.4	9251.57
Jmjd5	true	false	false	G2/M transition of mitotic cell cycle;transcription, DNA-dependent;regulation of transcription, DNA-dependent;cell cycle;chromatin modification;positive regulation of transcription, DNA-dependent;oxidation-reduction process;histone H3-K36 demethylation	nucleus	chromatin binding;oxidoreductase activity;oxidoreductase activity, acting on single donors with incorporation of molecular oxygen, incorporation of two atoms of oxygen;metal ion binding;histone demethylase activity (H3-K36 specific)	162113	9219.34
Creb3l1	true	false	false	transcription, DNA-dependent;regulation of transcription, DNA-dependent;response to unfolded protein	cellular_component;nucleus;endoplasmic reticulum;membrane;integral to membrane	DNA binding;sequence-specific DNA binding transcription factor activity;sequence-specific DNA binding;protein dimerization activity	384693	9193.72
Creb3l1	true	false	false	transcription, DNA-dependent;regulation of transcription, DNA-dependent;response to unfolded protein	cellular_component;nucleus;endoplasmic reticulum;membrane;integral to membrane	DNA binding;sequence-specific DNA binding transcription factor activity;sequence-specific DNA binding;protein dimerization activity	384693	9193.72
Chd9	false	false	true	transcription, DNA-dependent;regulation of transcription, DNA-dependent;biological_process;chromatin modification	cellular_component;nucleus;cytoplasm	nucleotide binding;molecular_function;nucleic acid binding;DNA binding;helicase activity;ATP binding;hydrolase activity;hydrolase activity, acting on acid anhydrides	2.06776e+06	9162.59
Chd9	false	true	false	transcription, DNA-dependent;regulation of transcription, DNA-dependent;biological_process;chromatin modification	cellular_component;nucleus;cytoplasm	nucleotide binding;molecular_function;nucleic acid binding;DNA binding;helicase activity;ATP binding;hydrolase activity;hydrolase activity, acting on acid anhydrides	2.06776e+06	9162.59
Chd9	true	false	false	transcription, DNA-dependent;regulation of transcription, DNA-dependent;biological_process;chromatin modification	cellular_component;nucleus;cytoplasm	nucleotide binding;molecular_function;nucleic acid binding;DNA binding;helicase activity;ATP binding;hydrolase activity;hydrolase activity, acting on acid anhydrides	2.06776e+06	9162.59
Chd9	false	false	true	transcription, DNA-dependent;regulation of transcription, DNA-dependent;biological_process;chromatin modification	cellular_component;nucleus;cytoplasm	nucleotide binding;molecular_function;nucleic acid binding;DNA binding;helicase activity;ATP binding;hydrolase activity;hydrolase activity, acting on acid anhydrides	2.06776e+06	9162.59
Cnot8	true	false	false	transcription, DNA-dependent;regulation of transcription, DNA-dependent;biological_process	intracellular;nucleus;cytoplasm	molecular_function;nucleic acid binding	132151	9150.48
Cnot8	false	false	true	transcription, DNA-dependent;regulation of transcription, DNA-dependent;biological_process	intracellular;nucleus;cytoplasm	molecular_function;nucleic acid binding	132151	9150.48
Snapc2	true	false	false	transcription, DNA-dependent;regulation of transcription, DNA-dependent;biological_process	cellular_component;nucleus	molecular_function	28300.7	9073.65
Zhx2	false	false	false	negative regulation of transcription from RNA polymerase II promoter;transcription, DNA-dependent;regulation of transcription, DNA-dependent;regulation of transcription from RNA polymerase II promoter;mRNA catabolic process;somatic stem cell maintenance;negative regulation of neuron differentiation;negative regulation of transcription, DNA-dependent	intracellular;nucleus;cytoplasm;plasma membrane	DNA binding;sequence-specific DNA binding transcription factor activity;protein binding;zinc ion binding;sequence-specific DNA binding;metal ion binding	1.29725e+06	8936.34
Hnf1b	false	false	true	negative regulation of transcription from RNA polymerase II promoter;endoderm formation;endodermal cell fate specification;kidney development;inner cell mass cell differentiation;liver development;transcription, DNA-dependent;regulation of transcription, DNA-dependent;endoderm development;response to glucose stimulus;embryo development;anterior/posterior pattern specification;positive regulation …	cell;nucleus;transcription factor complex	core promoter proximal region DNA binding;DNA binding;sequence-specific DNA binding transcription factor activity;sequence-specific distal enhancer binding RNA polymerase II transcription factor activity;protein binding;protein complex binding;protein homodimerization activity;sequence-specific DNA binding;transcription regulatory region DNA binding;protein heterodimerization activity	489825	8914.49
Nr2c1	false	false	true	negative regulation of transcription from RNA polymerase II promoter;transcription, DNA-dependent;regulation of transcription, DNA-dependent;steroid hormone mediated signaling pathway;negative regulation of transcription, DNA-dependent;positive regulation of retinoic acid receptor signaling pathway	nucleus;PML body	DNA binding;sequence-specific DNA binding transcription factor activity;steroid hormone receptor activity;receptor activity;protein binding;zinc ion binding;protein homodimerization activity;histone deacetylase binding;sequence-specific DNA binding;metal ion binding	434676	8819.81
Arid3a	true	false	false	transcription, DNA-dependent;regulation of transcription, DNA-dependent	intracellular;nucleus;cytoplasm	DNA binding;sequence-specific DNA binding transcription factor activity;protein binding;protein homodimerization activity	245564	8788.65
Arid3a	true	false	false	transcription, DNA-dependent;regulation of transcription, DNA-dependent	intracellular;nucleus;cytoplasm	DNA binding;sequence-specific DNA binding transcription factor activity;protein binding;protein homodimerization activity	245564	8788.65
Hsf1	false	true	false	in utero embryonic development;embryonic placenta development;transcription, DNA-dependent;regulation of transcription, DNA-dependent;protein phosphorylation;response to stress;defense response;spermatogenesis;negative regulation of cell proliferation;response to heat;response to lipopolysaccharide;negative regulation of tumor necrosis factor production;positive regulation of multicellular organi…	nucleus;cytoplasm;protein complex;pronucleus	DNA binding;sequence-specific DNA binding transcription factor activity;sequence-specific DNA binding	206503	8776.92
Nrip1	false	false	true	negative regulation of transcription from RNA polymerase II promoter;ovarian follicle rupture;transcription, DNA-dependent;regulation of transcription, DNA-dependent;regulation of transcription from RNA polymerase II promoter;lipid storage;ovulation;positive regulation of transcription from RNA polymerase II promoter	histone deacetylase complex;nucleus	transcription coactivator activity;transcription corepressor activity;receptor activity;receptor binding;protein binding;estrogen receptor binding;nuclear hormone receptor binding;glucocorticoid receptor binding;histone deacetylase binding;retinoic acid receptor binding;retinoid X receptor binding	720956	8772.03
Nrip1	false	true	false	negative regulation of transcription from RNA polymerase II promoter;ovarian follicle rupture;transcription, DNA-dependent;regulation of transcription, DNA-dependent;regulation of transcription from RNA polymerase II promoter;lipid storage;ovulation;positive regulation of transcription from RNA polymerase II promoter	histone deacetylase complex;nucleus	transcription coactivator activity;transcription corepressor activity;receptor activity;receptor binding;protein binding;estrogen receptor binding;nuclear hormone receptor binding;glucocorticoid receptor binding;histone deacetylase binding;retinoic acid receptor binding;retinoid X receptor binding	720956	8772.03
Nrip1	false	true	false	negative regulation of transcription from RNA polymerase II promoter;ovarian follicle rupture;transcription, DNA-dependent;regulation of transcription, DNA-dependent;regulation of transcription from RNA polymerase II promoter;lipid storage;ovulation;positive regulation of transcription from RNA polymerase II promoter	histone deacetylase complex;nucleus	transcription coactivator activity;transcription corepressor activity;receptor activity;receptor binding;protein binding;estrogen receptor binding;nuclear hormone receptor binding;glucocorticoid receptor binding;histone deacetylase binding;retinoic acid receptor binding;retinoid X receptor binding	720956	8772.03
Nrip1	true	false	false	negative regulation of transcription from RNA polymerase II promoter;ovarian follicle rupture;transcription, DNA-dependent;regulation of transcription, DNA-dependent;regulation of transcription from RNA polymerase II promoter;lipid storage;ovulation;positive regulation of transcription from RNA polymerase II promoter	histone deacetylase complex;nucleus	transcription coactivator activity;transcription corepressor activity;receptor activity;receptor binding;protein binding;estrogen receptor binding;nuclear hormone receptor binding;glucocorticoid receptor binding;histone deacetylase binding;retinoic acid receptor binding;retinoid X receptor binding	720956	8772.03
Nrip1	false	true	false	negative regulation of transcription from RNA polymerase II promoter;ovarian follicle rupture;transcription, DNA-dependent;regulation of transcription, DNA-dependent;regulation of transcription from RNA polymerase II promoter;lipid storage;ovulation;positive regulation of transcription from RNA polymerase II promoter	histone deacetylase complex;nucleus	transcription coactivator activity;transcription corepressor activity;receptor activity;receptor binding;protein binding;estrogen receptor binding;nuclear hormone receptor binding;glucocorticoid receptor binding;histone deacetylase binding;retinoic acid receptor binding;retinoid X receptor binding	720956	8772.03
Nrip1	false	true	false	negative regulation of transcription from RNA polymerase II promoter;ovarian follicle rupture;transcription, DNA-dependent;regulation of transcription, DNA-dependent;regulation of transcription from RNA polymerase II promoter;lipid storage;ovulation;positive regulation of transcription from RNA polymerase II promoter	histone deacetylase complex;nucleus	transcription coactivator activity;transcription corepressor activity;receptor activity;receptor binding;protein binding;estrogen receptor binding;nuclear hormone receptor binding;glucocorticoid receptor binding;histone deacetylase binding;retinoic acid receptor binding;retinoid X receptor binding	720956	8772.03
Nrip1	false	true	false	negative regulation of transcription from RNA polymerase II promoter;ovarian follicle rupture;transcription, DNA-dependent;regulation of transcription, DNA-dependent;regulation of transcription from RNA polymerase II promoter;lipid storage;ovulation;positive regulation of transcription from RNA polymerase II promoter	histone deacetylase complex;nucleus	transcription coactivator activity;transcription corepressor activity;receptor activity;receptor binding;protein binding;estrogen receptor binding;nuclear hormone receptor binding;glucocorticoid receptor binding;histone deacetylase binding;retinoic acid receptor binding;retinoid X receptor binding	720956	8772.03
Nrip1	false	true	false	negative regulation of transcription from RNA polymerase II promoter;ovarian follicle rupture;transcription, DNA-dependent;regulation of transcription, DNA-dependent;regulation of transcription from RNA polymerase II promoter;lipid storage;ovulation;positive regulation of transcription from RNA polymerase II promoter	histone deacetylase complex;nucleus	transcription coactivator activity;transcription corepressor activity;receptor activity;receptor binding;protein binding;estrogen receptor binding;nuclear hormone receptor binding;glucocorticoid receptor binding;histone deacetylase binding;retinoic acid receptor binding;retinoid X receptor binding	720956	8772.03
Nrip1	false	false	true	negative regulation of transcription from RNA polymerase II promoter;ovarian follicle rupture;transcription, DNA-dependent;regulation of transcription, DNA-dependent;regulation of transcription from RNA polymerase II promoter;lipid storage;ovulation;positive regulation of transcription from RNA polymerase II promoter	histone deacetylase complex;nucleus	transcription coactivator activity;transcription corepressor activity;receptor activity;receptor binding;protein binding;estrogen receptor binding;nuclear hormone receptor binding;glucocorticoid receptor binding;histone deacetylase binding;retinoic acid receptor binding;retinoid X receptor binding	720956	8772.03
Prr13	false	true	false	transcription, DNA-dependent;regulation of transcription, DNA-dependent;biological_process	nucleus;nucleolus	molecular_function	31878.9	8765.17
Cdc5l	false	false	true	transcription, DNA-dependent;regulation of transcription, DNA-dependent;mRNA processing;cell cycle;biological_process;RNA splicing	nucleus;spliceosomal complex;nucleolus;cytoplasm;nuclear speck;catalytic step 2 spliceosome	DNA binding;RNA binding;protein domain specific binding	363635	8695.67
Rnf141	false	false	false	regulation of transcription, DNA-dependent	cellular_component	DNA binding;zinc ion binding;metal ion binding	240598	8639.99
Mxi1	false	true	false	negative regulation of transcription from RNA polymerase II promoter;transcription, DNA-dependent;regulation of transcription, DNA-dependent	nucleus;cytoplasm	DNA binding;protein binding	559353	8565.23
Mxi1	false	false	true	negative regulation of transcription from RNA polymerase II promoter;transcription, DNA-dependent;regulation of transcription, DNA-dependent	nucleus;cytoplasm	DNA binding;protein binding	559353	8565.23
Ncoa5	false	false	true	transcription, DNA-dependent;regulation of transcription, DNA-dependent;biological_process	cellular_component;nucleus	molecular_function;receptor activity	292357	8493.06
Smyd2	false	false	false	negative regulation of transcription from RNA polymerase II promoter;transcription, DNA-dependent;regulation of transcription, DNA-dependent;negative regulation of cell proliferation;histone H3-K36 methylation;chromatin modification;peptidyl-lysine monomethylation;peptidyl-lysine dimethylation;methylation;regulation of DNA damage response, signal transduction by p53 class mediator	nucleus;cytoplasm;cytosol	RNA polymerase II core binding;p53 binding;binding;protein binding;methyltransferase activity;zinc ion binding;protein-lysine N-methyltransferase activity;transferase activity;histone-lysine N-methyltransferase activity;metal ion binding;histone methyltransferase activity (H3-K36 specific)	353634	8460.76
Ss18	false	false	true	microtubule cytoskeleton organization;cell morphogenesis;transcription, DNA-dependent;regulation of transcription, DNA-dependent;cytoskeleton organization;intracellular protein kinase cascade;response to drug;positive regulation of transcription from RNA polymerase II promoter;ephrin receptor signaling pathway	nucleus;cytoplasmic microtubule	ligand-dependent nuclear receptor transcription coactivator activity	482827	8428.36
Zbtb20	false	false	true	transcription, DNA-dependent;regulation of transcription, DNA-dependent;biological_process	intracellular;nucleus	nucleic acid binding;DNA binding;zinc ion binding;metal ion binding	3.13109e+06	8420.53
Zbtb20	false	true	false	transcription, DNA-dependent;regulation of transcription, DNA-dependent;biological_process	intracellular;nucleus	nucleic acid binding;DNA binding;zinc ion binding;metal ion binding	3.13109e+06	8420.53
Zbtb20	false	false	true	transcription, DNA-dependent;regulation of transcription, DNA-dependent;biological_process	intracellular;nucleus	nucleic acid binding;DNA binding;zinc ion binding;metal ion binding	3.13109e+06	8420.53
Zbtb20	false	false	true	transcription, DNA-dependent;regulation of transcription, DNA-dependent;biological_process	intracellular;nucleus	nucleic acid binding;DNA binding;zinc ion binding;metal ion binding	3.13109e+06	8420.53
Zbtb20	false	false	false	transcription, DNA-dependent;regulation of transcription, DNA-dependent;biological_process	intracellular;nucleus	nucleic acid binding;DNA binding;zinc ion binding;metal ion binding	3.13109e+06	8420.53
[truncated: 587 more rows]
