# Supplementary material for: Temporal mapping of CEBPA and CEBPB binding during liver regeneration reveals dynamic occupancy and specific regulatory codes for homeostatic and cell cycle gene batteries
Source: HighWire-hosted journal article supplement (doi:10.1101/gr.146399.112), 2013-02-12
Supplement: Supp_Table_S9.xlsx [file Supp_Table_S9.xlsx]

## Sheet: No_overlap_FOXA2
Jakobsen_Table S9			NB: UNFILTERED PEAKS
chr.x	start.x	end.x	feature	chr.y	strand	start.y	end.y	X0_pol_body	X3_pol_body	X8_pol_body	X16_pol_body	X24_pol_body	X36_pol_body	X48_pol_body	X168_pol_body
chr17	15124511	15125035	9030025P20Rik	chr17	+	15115827	15128541	1653	468.863	317.254	283.917	1	1117.95	255.589	305.483
chr17	15127731	15128264	9030025P20Rik	chr17	+	15115827	15128541	1653	468.863	317.254	283.917	1	1117.95	255.589	305.483
chr7	51433185	51433575	Klk1b24	chr7	+	51443632	51447821	1	94.5725	286.454	283.917	1	652.554	170.726	508.472
chr7	147906845	147907511	Olfr541	chr7	+	147890151	147891090	1	1	73.4776	140.652	1	415.279	1	11.815
chr7	147903198	147903665	Olfr541	chr7	+	147890151	147891090	1	1	73.4776	140.652	1	415.279	1	11.815
chr7	110412647	110413058	Usp-ps	chr7	-	110397851	110403414	1	1	217.777	187.845	1	373.317	510.178	102.494
chrX	67638712	67639311	1110012L19Rik	chrX	+	67639087	67642591	237	112.889	1016.08	559.128	1	366.45	1144.66	1022.18
chr7	34263271	34263551	Abpd	chr7	-	34149361	34151338	1	1	75.0503	99.9606	1	310.374	170.726	1
chr7	34284040	34284453	Abpd	chr7	-	34149361	34151338	1	1	75.0503	99.9606	1	310.374	170.726	1
chr2	111885096	111885536	Olfr1312	chr2	-	111882233	111883187	1	1	48.5757	1	1	280.238	81.5296	1
chr2	36550377	36550762	Olfr346	chr2	+	36543523	36544453	1	1	98.2484	1	1	280.238	1	171.96
chrX	123286452	123286712	4932411N23Rik	chrX	-	123346993	123350397	1	94.5725	127.737	283.917	1	280.238	85.863	203.989
chrX	122680505	122680917	4932411N23Rik	chrX	-	123346993	123350397	1	94.5725	127.737	283.917	1	280.238	85.863	203.989
chrX	123312115	123312508	4932411N23Rik	chrX	-	123346993	123350397	1	94.5725	127.737	283.917	1	280.238	85.863	203.989
chrX	123303296	123303690	4932411N23Rik	chrX	-	123346993	123350397	1	94.5725	127.737	283.917	1	280.238	85.863	203.989
chrX	138745019	138745348	Kcne1l	chrX	-	138739295	138740741	1132	1714.77	270.334	329.906	1	280.238	302.535	203.989
chr6	67465373	67465732	Tacstd2	chr6	-	67484052	67485816	1417	1818.7	1316.34	790.277	1	280.238	1305.36	1604.11
chr6	67478326	67478564	Tacstd2	chr6	-	67484052	67485816	1417	1818.7	1316.34	790.277	1	280.238	1305.36	1604.11
chr6	42977829	42978133	Olfr444	chr6	+	42905498	42906431	1	1	62.0751	1	1	276.041	1	194.838
chr3	22417210	22417656	Rprl2	chr3	+	22149862	22150561	1	1	67.7108	97.312	1	214.624	128.836	1
chr3	22454326	22454724	Rprl2	chr3	+	22149862	22150561	1	1	67.7108	97.312	1	214.624	128.836	1
chr3	22600430	22600746	Rprl2	chr3	+	22149862	22150561	1	1	67.7108	97.312	1	214.624	128.836	1
chr17	17165141	17165570	Zfp960	chr17	+	17201066	17226595	89	1	59.716	114.167	1	205.469	15.4448	170.712
chr15	31829327	31829816	Tas2r119	chr15	+	32107043	32108049	1	71.0799	215.156	57.5833	1	187.158	1	380.772
chr17	15156015	15156403	Gm3435	chr17	+	15146803	15159413	1	94.5725	63.779	57.5833	1	187.158	85.863	102.494
chrX	17439783	17440066	Dusp21	chrX	+	17722995	17723818	3181	107.314	81.2103	40.0064	1	187.158	141.475	93.7592
chr5	61448739	61449074	G6pd2	chr5	+	62200081	62201716	1	351.001	85.6664	317.385	1	182.581	1	66.7218
chr5	62428690	62429059	G6pd2	chr5	+	62200081	62201716	1	351.001	85.6664	317.385	1	182.581	1	66.7218
chr7	111094948	111095098	Olfr633	chr7	+	111095081	111096020	1	1	115.811	114.167	1	130.701	141.114	203.989
chr4	60675823	60676488	Mup11	chr4	-	60671338	60675267	1	1	139.271	57.5833	1	94.0792	85.5019	342.504
chr4	60684401	60685134	Mup11	chr4	-	60671338	60675267	1	1	139.271	57.5833	1	94.0792	85.5019	342.504
chr4	60682683	60683174	Mup11	chr4	-	60671338	60675267	1	1	139.271	57.5833	1	94.0792	85.5019	342.504
chr4	60694490	60694988	Mup11	chr4	-	60671338	60675267	1	1	139.271	57.5833	1	94.0792	85.5019	342.504
chr4	60689522	60689910	Mup11	chr4	-	60671338	60675267	1	1	139.271	57.5833	1	94.0792	85.5019	342.504
chr4	60683539	60683828	Mup11	chr4	-	60671338	60675267	1	1	139.271	57.5833	1	94.0792	85.5019	342.504
chr4	60677038	60677828	Mup11	chr4	-	60671338	60675267	1	1	139.271	57.5833	1	94.0792	85.5019	342.504
chr7	115059993	115060397	Olfr472	chr7	+	115046232	115047165	1	1	104.408	57.5833	1	94.0792	1	84.6081
chr4	60015359	60015851	Mup6	chr4	+	60016420	60019086	1	3.78727	431.803	62.3989	1	94.0792	581.68	699.398
chr4	60046083	60046362	Mup6	chr4	+	60016420	60019086	1	3.78727	431.803	62.3989	1	94.0792	581.68	699.398
chr17	33372476	33372875	Gm4461	chr17	-	33352205	33353296	1	94.5725	1	1	1	94.0792	1	1
chr10	40783595	40783877	Gpr6	chr10	-	40790298	40791390	260	2432.29	656.444	128.132	1	94.0792	943.521	424.864
chr18	49341610	49341891	1700044K03Rik	chr18	+	49682942	49684094	1	1	87.3702	1	1	90.6459	170.726	21.798
chr18	49514955	49515307	1700044K03Rik	chr18	+	49682942	49684094	1	1	87.3702	1	1	90.6459	170.726	21.798
chr10	19064246	19064515	Olig3	chr10	+	19076344	19078410	749	1231.78	1135.74	405.27	8.36936	272.227	1453.06	867.862
chr10	19183517	19184563	Olig3	chr10	+	19076344	19078410	749	1231.78	1135.74	405.27	8.36936	272.227	1453.06	867.862
chr10	19163224	19163780	Olig3	chr10	+	19076344	19078410	749	1231.78	1135.74	405.27	8.36936	272.227	1453.06	867.862
chr6	74502121	74502382	4931417E11Rik	chr6	-	73418575	73419661	1	206.461	213.321	184.474	1	23.1254	143.281	197.749
chr6	75154019	75154403	4931417E11Rik	chr6	-	73418575	73419661	1	206.461	213.321	184.474	1	23.1254	143.281	197.749
chr6	73469895	73470345	4931417E11Rik	chr6	-	73418575	73419661	1	206.461	213.321	184.474	1	23.1254	143.281	197.749
chr15	59928751	59929053	4933412E24Rik	chr15	-	59846420	59848173	1	405.95	864.309	704.078	62.85	1283.51	976.383	318.794
chrX	59228168	59228319	Ldoc1	chrX	+	58962790	58964125	1	375.29	449.627	170.75	10.2117	187.158	302.174	522.614
chrX	59105828	59106277	Ldoc1	chrX	+	58962790	58964125	1	375.29	449.627	170.75	10.2117	187.158	302.174	522.614
chrX	58789306	58789661	Ldoc1	chrX	+	58962790	58964125	1	375.29	449.627	170.75	10.2117	187.158	302.174	522.614
chrX	58847700	58848163	Ldoc1	chrX	+	58962790	58964125	1	375.29	449.627	170.75	10.2117	187.158	302.174	522.614
chr7	112004796	112005218	Dub1	chr7	+	112005529	112011181	1	94.5725	478.33	57.5833	62.85	931.792	170.726	1015.94
chr1	33741402	33741748	1700001G17Rik	chr1	+	33726668	33727557	1	1295.09	505.984	938.838	124.7	1831.68	770.184	102.494
chr10	29720773	29721165	Cenpw	chr10	-	29915814	29920346	1	2306.07	2761.57	1920.98	816.893	10003.6	3890.62	2141.95
chr10	29768627	29769009	Cenpw	chr10	-	29915814	29920346	1	2306.07	2761.57	1920.98	816.893	10003.6	3890.62	2141.95
chr17	34017758	34018119	Kifc1	chr17	-	34012610	34027578	2079	1907.89	3754.37	1670.81	743.2	8363.63	5287.79	2024.65
chr6	42172242	42172639	Tas2r144	chr6	+	42165326	42166286	709	1	232.063	57.5833	16.7915	187.158	416.287	102.494
chr19	44454512	44455095	Scd1	chr19	-	44468939	44482199	8932	273742	13791.4	7143.98	10514.4	111167	14194.4	17085.7
chr19	44492575	44493019	Scd1	chr19	-	44468939	44482199	8932	273742	13791.4	7143.98	10514.4	111167	14194.4	17085.7
chr14	73394032	73394541	Gm9199	chr14	+	73425409	73426697	1	1	69.5457	56.861	1	10.5368	1	218.547
chr1	88303367	88303717	Nmur1	chr1	-	88282899	88284716	1704	1782.06	855.528	740.676	248.4	2461.11	419.898	957.709
chr12	34412720	34412990	Ferd3l	chr12	+	34613289	34614174	1	104.527	248.577	220.832	33.1093	305.415	335.035	210.228
chr5	138648328	138648722	Mblac1	chr5	+	138635541	138636628	1490	1104.36	739.406	1539.58	319.988	2887.6	658.959	917.777
chr7	50359129	50359304	Zfp936	chr7	+	50432957	50447479	1	1	859.722	340.5	62.85	559.475	340.452	1929.39
chr19	61271040	61271427	Gm7102	chr19	-	61250588	61252212	473	281.718	191.696	57.5833	62.85	559.475	85.863	203.989
chr19	60424262	60424618	Prlhr	chr19	-	60542635	60544207	2241	1919.83	1057.5	1029.13	153.388	1291.14	921.493	664.873
chr5	146714923	146715376	Cyp3a11	chr5	-	146666182	146691430	124446	16848	69137.9	103251	90778.3	736838	83476.3	102837
chr5	146674665	146674954	Cyp3a11	chr5	-	146666182	146691430	124446	16848	69137.9	103251	90778.3	736838	83476.3	102837
chr5	146678957	146679507	Cyp3a11	chr5	-	146666182	146691430	124446	16848	69137.9	103251	90778.3	736838	83476.3	102837
chr5	146691408	146691762	Cyp3a11	chr5	-	146666182	146691430	124446	16848	69137.9	103251	90778.3	736838	83476.3	102837
chr5	146712035	146712653	Cyp3a11	chr5	-	146666182	146691430	124446	16848	69137.9	103251	90778.3	736838	83476.3	102837
chr5	146715972	146716550	Cyp3a11	chr5	-	146666182	146691430	124446	16848	69137.9	103251	90778.3	736838	83476.3	102837
chr17	24069513	24069783	Sbp	chr17	+	24078962	24082574	4013	1079.67	608.737	442.831	62.85	463.344	255.589	844.984
chr2	50819561	50820014	Gm13498	chr2	+	50765203	50767366	1	268.578	342.156	459.686	62.85	446.559	216.588	467.292
chr2	50483080	50483458	Gm13498	chr2	+	50765203	50767366	1	268.578	342.156	459.686	62.85	446.559	216.588	467.292
chr2	50826392	50826733	Gm13498	chr2	+	50765203	50767366	1	268.578	342.156	459.686	62.85	446.559	216.588	467.292
chr6	135242303	135242827	Pbp2	chr6	-	135259146	135260402	1628	847.533	849.368	784.739	239.188	1665.74	767.656	592.496
chr6	135273240	135273716	Pbp2	chr6	-	135259146	135260402	1628	847.533	849.368	784.739	239.188	1665.74	767.656	592.496
chr9	67661574	67662028	C2cd4a	chr9	-	67678338	67680137	1	1558.29	708.082	523.733	174.443	1148.47	913.91	686.087
chr11	91087504	91087766	Kif2b	chr11	-	91436599	91438869	3541	1504.93	1223.16	1275.45	248.4	1526.89	1345.09	1253.04
chr11	91431575	91431907	Kif2b	chr11	-	91436599	91438869	3541	1504.93	1223.16	1275.45	248.4	1526.89	1345.09	1253.04
chr7	54001684	54002120	Saa1	chr7	-	53995868	53998350	1	387326	133517	27285.7	9725.66	59174.9	66489.9	15510.1
chr16	90065826	90066095	Gm10789	chr16	+	90142481	90147072	8733	5876.96	4644.02	3628.59	2907.95	17553.3	7240	2841.59
chr10	129960536	129961143	Vmn2r87	chr10	-	129908876	129934435	237	1	1133.38	510.25	310.25	1862.58	1358.81	1218.93
chr13	13255274	13255688	Prl2c5	chr13	+	13275048	13284107	945	1	406.114	57.5833	62.85	373.317	764.767	102.494
chr13	13308583	13309004	Prl2c5	chr13	+	13275048	13284107	945	1	406.114	57.5833	62.85	373.317	764.767	102.494
chr11	32017669	32018005	Il9r	chr11	-	32088996	32100279	10621	11229.7	7328.97	5654.76	1770.96	9829.25	7214.36	6088.17
chrX	149358121	149358433	Usp51	chrX	+	149441011	149444002	2125	1655.04	1342.03	2816.68	1843.6	10198.1	1954.29	687.751
chr5	115269183	115269332	2610524H06Rik	chr5	-	115271945	115273477	697	271.763	375.446	397.324	301.565	1634.08	293.868	406.977
chr14	52658926	52659376	Olfr221	chr14	-	52654848	52655784	277	189.738	529.313	96.1081	124.7	652.554	505.123	749.729
chr5	35561562	35562023	Adra2c	chr5	+	35621214	35624412	4005	4522.35	1480.56	1348.65	310.25	1583.35	1656.37	901.554
chrX	42280612	42280875	Dcaf12l1	chrX	-	42139743	42143374	1323	3868.93	1754.09	1996.1	681.35	3446.84	1987.16	914.449
chr4	127102011	127102547	Gjb5	chr4	-	127032052	127035408	1653	1959.65	1444.26	1229.22	805.05	3989.29	1016.47	1918.99
chr14	66391816	66392588	Pbk	chr14	+	66424747	66436659	2833	1021.14	4006.53	1252.09	1415.92	6851.48	6373.31	3672.68
chr14	66423427	66423697	Pbk	chr14	+	66424747	66436659	2833	1021.14	4006.53	1252.09	1415.92	6851.48	6373.31	3672.68
chr7	29271810	29272223	1700028B04Rik	chr7	+	29281959	29282511	1	2.59272	18.6934	34.7092	1	4.81472	1	45.0918
chr13	24870424	24870973	Gmnn	chr13	-	24843713	24853806	10887	10475.6	10940.3	13991.8	9439.57	44881.6	15161.9	8539
chr3	86790283	86790663	Cd1d2	chr3	+	86790507	86793454	1	138.771	464.699	528.308	172.864	790.266	510.178	636.172
chr7	104571932	104572454	Thrsp	chr7	-	104561466	104566020	185272	407415	38363.3	20038.2	33127.6	150016	25000.9	62115.1
chr5	75475120	75475388	Gsx2	chr5	+	75471625	75473918	1889	501.115	632.721	799.427	433.95	1955.66	572.652	839.992
chr19	51644264	51644691	Ins1	chr19	+	52338812	52339948	919	112.093	131.538	126.206	28.8983	127.649	76.8351	226.451
chr3	94175643	94175996	Rorc	chr3	+	94176747	94202161	57005	36928.7	51797.2	139615	30340.4	130267	32861.8	36609.7
chrX	100183933	100184296	Gm5126	chrX	-	100127385	100129562	1	1659.82	446.35	566.833	114.172	466.396	170.726	812.955
chr5	147003640	147003950	1700001J03Rik	chr5	-	146994025	146996880	1	435.416	438.225	566.833	186.55	745.633	85.1408	745.985
chrX	41848911	41849291	Dcaf12l2	chrX	-	41718633	41721514	2361	528.59	630.362	584.651	310.25	1211.03	378.37	607.47
chrX	41556533	41556942	Dcaf12l2	chrX	-	41718633	41721514	2361	528.59	630.362	584.651	310.25	1211.03	378.37	607.47
chr1	46031752	46032171	Gm3852	chr1	-	46068391	46069108	1	107.713	95.1029	174.602	79.431	302.363	27.0006	88.3517
chr1	174862401	174862761	Olfr16	chr1	+	174886898	174887948	1	1	229.573	105.98	188.655	713.971	254.506	156.153
chr19	37856927	37857348	Cyp26a1	chr19	+	37772297	37776026	8025	3488.67	3415.83	5484.77	5451.43	20493.3	3871.12	3354.47
chr19	37935706	37936055	Cyp26a1	chr19	+	37772297	37776026	8025	3488.67	3415.83	5484.77	5451.43	20493.3	3871.12	3354.47
chr19	37941868	37942317	Cyp26a1	chr19	+	37772297	37776026	8025	3488.67	3415.83	5484.77	5451.43	20493.3	3871.12	3354.47
chr19	37934718	37935196	Cyp26a1	chr19	+	37772297	37776026	8025	3488.67	3415.83	5484.77	5451.43	20493.3	3871.12	3354.47
chr15	75005896	75006220	Ly6c2	chr15	-	74938590	74942379	1	281.718	126.558	170.75	124.7	466.396	170.726	102.494
chr15	74918480	74918853	Ly6c2	chr15	-	74938590	74942379	1	281.718	126.558	170.75	124.7	466.396	170.726	102.494
chr15	74915869	74917573	Ly6c2	chr15	-	74938590	74942379	1	281.718	126.558	170.75	124.7	466.396	170.726	102.494
chr11	117704263	117704628	Birc5	chr11	+	117710550	117717057	3305	2325.98	3157.51	2251.33	1793.86	6685.92	4884.78	2540.85
chr13	23822232	23822737	Hist1h1c	chr13	+	23830675	23832236	80937	60701.3	65197.3	74534.9	32956.8	122412	78548.1	50321.4
chr6	56490255	56490663	Lsm5	chr6	-	56651056	56654693	2182	5368.48	4259.48	4639.87	2108.9	7830.33	5138.64	3050.41
chr5	67964816	67965078	Shisa3	chr5	+	67999121	68003511	1181	4588.44	2391.06	1744.25	805.05	2979.53	3196.18	1551.7
chr5	67953138	67953513	Shisa3	chr5	+	67999121	68003511	1181	4588.44	2391.06	1744.25	805.05	2979.53	3196.18	1551.7
chr13	23636253	23637005	Hist1h3f	chr13	+	23635920	23636923	4382	9439.08	6083.35	7851.15	3979.14	14414.2	9274.54	3094.08
chr8	96689029	96689472	Mt2	chr8	+	96696517	96697467	7679	464450	174413	253319	39938.2	143848	199085	26204
chr7	150955350	150955685	Mrgprg	chr7	-	150949614	150952898	473	3125.53	1895.9	2302.38	707.932	2531.3	1487.37	1351.62
chr7	150954165	150954547	Mrgprg	chr7	-	150949614	150952898	473	3125.53	1895.9	2302.38	707.932	2531.3	1487.37	1351.62
chr17	28690408	28690895	Gm749	chr17	+	28686431	28689563	709	1145.77	1294.19	666.998	299.459	1066.45	1084.72	1645.29
chr16	3351357	3351759	Rtp1	chr16	+	23429205	23434033	3541	2218.07	2375.33	1415.82	372.1	1304.11	1648.79	3304.14
chr4	108072892	108073423	Gpx7	chr4	-	108072821	108079318	16058	13223	12837.7	10225.2	6859.5	23657.6	16334.8	9330.58
chr4	108077167	108077492	Gpx7	chr4	-	108072821	108079318	16058	13223	12837.7	10225.2	6859.5	23657.6	16334.8	9330.58
chr8	97343485	97343902	Ccl17	chr8	+	97334352	97335936	473	1729.11	883.182	403.825	413.947	1397.19	372.231	723.523
chr8	96644007	96644383	Mt4	chr8	+	96661103	96662931	1	763.517	415.027	632.807	372.1	1249.18	267.867	748.897
chr19	4046066	4046458	Gstp2	chr19	-	4040287	4042221	262	3428.54	2706.13	1768.08	1475.92	4885.75	2341.41	1943.95
chr8	73956702	73957188	Ankle1	chr8	+	73929910	73933803	7317	5099.31	4116.76	2441.31	4831.88	15988.1	6125.94	2772.54
chrX	15896048	15896557	Cypt1	chrX	+	16099997	16100815	1	1	118.432	1	1	3.28883	9.66686	176.951
chrX	15629756	15630047	Cypt1	chrX	+	16099997	16100815	1	1	118.432	1	1	3.28883	9.66686	176.951
chrX	15448949	15449307	Cypt1	chrX	+	16099997	16100815	1	1	118.432	1	1	3.28883	9.66686	176.951
chr11	58758592	58759061	Hist3h2ba	chr11	+	58762412	58763032	1	10.5563	30.358	25.078	1	3.28883	1	94.1751
chr15	103137685	103138049	Gpr84	chr15	-	103138665	103140869	2453	2357.44	1733.52	2156.22	810.577	2645.36	1727.51	1672.75
chr19	4033280	4033559	Gstp1	chr19	-	4035410	4037912	116654	43598.6	55637.3	65299.8	36307.7	118219	64824.1	29187.7
chr2	118655829	118656226	D2Ertd750e	chr2	+	118639738	118661948	15813	7820.08	12938.6	5507.88	5358.26	17317.9	17779.3	12046.4
chr5	25212210	25212622	Xrcc2	chr5	-	25195633	25211615	8109	9163.94	8923.61	6636.66	6051.51	19557.2	8157.24	10110.9
chr16	18811616	18812082	Cdc45	chr16	-	18780539	18812065	13925	15116.3	21167.2	16980.6	18072	58310.5	27882.3	19396
chr16	18804830	18805228	Cdc45	chr16	-	18780539	18812065	13925	15116.3	21167.2	16980.6	18072	58310.5	27882.3	19396
chr15	78363024	78363472	C1qtnf6	chr15	-	78354515	78360047	8733	10150.6	7871.57	8159.35	3419.07	10952.7	7601.48	5096.1
chr3	8245114	8246069	Gm6194	chr3	-	8461386	8463098	2361	1141.79	317.254	446.684	248.4	789.503	170.726	403.234
chr3	8682915	8683227	Hey1	chr3	-	8663358	8667038	2125	2349.07	1800.49	2350.05	763.202	2418.39	1478.34	1898.61
chr3	8704182	8704443	Hey1	chr3	-	8663358	8667038	2125	2349.07	1800.49	2350.05	763.202	2418.39	1478.34	1898.61
chr3	8766500	8766918	Hey1	chr3	-	8663358	8667038	2125	2349.07	1800.49	2350.05	763.202	2418.39	1478.34	1898.61
chr3	8606695	8606969	Hey1	chr3	-	8663358	8667038	2125	2349.07	1800.49	2350.05	763.202	2418.39	1478.34	1898.61
chr4	140770505	140771036	6330545A04Rik	chr4	+	140769870	140776029	945	4826.56	3064.46	2435.53	1604.1	5078.39	2312.52	3602.8
chr13	23528036	23528427	C230035I16Rik	chr13	-	23519844	23522886	9	1407.77	1565.1	1109.79	1171.68	3705.86	1403.59	1800.86
chr13	23537715	23538220	C230035I16Rik	chr13	-	23519844	23522886	9	1407.77	1565.1	1109.79	1171.68	3705.86	1403.59	1800.86
chr13	23523135	23523465	C230035I16Rik	chr13	-	23519844	23522886	9	1407.77	1565.1	1109.79	1171.68	3705.86	1403.59	1800.86
chr13	23528648	23529045	C230035I16Rik	chr13	-	23519844	23522886	9	1407.77	1565.1	1109.79	1171.68	3705.86	1403.59	1800.86
chr12	13736696	13737176	Fam84a	chr12	-	14154403	14158844	1	15307.9	8497.65	10127.2	3941.24	12406.1	11846.4	3793.31
chr12	13731099	13731780	Fam84a	chr12	-	14154403	14158844	1	15307.9	8497.65	10127.2	3941.24	12406.1	11846.4	3793.31
chr12	14062981	14063477	Fam84a	chr12	-	14154403	14158844	1	15307.9	8497.65	10127.2	3941.24	12406.1	11846.4	3793.31
chr1	88375679	88376105	Ptma	chr1	+	88423310	88427273	31019	23707.5	17025	27631	11423	35936.8	21640.7	9623
chr17	34116511	34116948	H2-K2	chr17	-	34111603	34115736	15908	13488.2	7274.97	7691.51	5522.23	17364.8	5904.58	8655.06
chr17	34115667	34115909	H2-K2	chr17	-	34111603	34115736	15908	13488.2	7274.97	7691.51	5522.23	17364.8	5904.58	8655.06
chr17	53821947	53822300	Sgol1	chr17	-	53814111	53828640	4013	4240.83	8820.46	5280.1	7452.21	23406.2	12979.6	6608.95
chr17	53827368	53827864	Sgol1	chr17	-	53814111	53828640	4013	4240.83	8820.46	5280.1	7452.21	23406.2	12979.6	6608.95
chr2	121299534	121299982	Mfap1b	chr2	-	121287401	121299759	12146	17175.7	7868.16	8631.76	4093.36	12733.4	6107.89	6758.69
chr2	121294691	121295094	Mfap1b	chr2	-	121287401	121299759	12146	17175.7	7868.16	8631.76	4093.36	12733.4	6107.89	6758.69
chr2	129698630	129699112	4932416H05Rik	chr2	-	129624104	129627195	26197	48241.4	18948.6	31650.6	11470.9	35679.3	20000.9	12486.1
chr2	129675681	129675981	4932416H05Rik	chr2	-	129624104	129627195	26197	48241.4	18948.6	31650.6	11470.9	35679.3	20000.9	12486.1
chr1	193358297	193358698	Dtl	chr1	-	193361243	193399413	7473	6420.87	14020.6	6848.06	10850.3	33741.4	18657.5	16486.8
chr3	137425514	137425879	H2afz	chr3	+	137527562	137529886	3357	2683.94	3807.32	3673.86	2984.8	9273.44	5434.04	3644.4
chr3	137515863	137516183	H2afz	chr3	+	137527562	137529886	3357	2683.94	3807.32	3673.86	2984.8	9273.44	5434.04	3644.4
chr7	38878654	38878924	Ccne1	chr7	-	38883002	38892509	10838	13908.3	8194.11	7419.92	6385.5	19753.2	11859.8	5554.07
chr14	101147973	101148412	1700110M21Rik	chr14	-	101596906	101599286	945	928.762	613.455	743.084	186.55	576.26	366.814	408.225
chr15	103440799	103441299	Tuba1b	chr15	-	98761861	98764821	19608	22329.8	15467.6	17989.4	13130.3	39959.1	19024.8	11844.6
chr7	17518208	17518639	Calm3	chr7	-	17500727	17509381	27499	32756.6	21374	33049.5	11689.6	35154.4	23760.5	13344.2
chr5	138611966	138612745	Mcm7	chr5	-	138605816	138613090	41841	31358.2	24873.1	40465.5	22756	68419.2	31871.9	13558
chrX	5517106	5517487	Nudt11	chrX	+	5624624	5631869	1	94.5725	821.845	397.083	248.4	745.633	764.767	1015.94
chr18	82548823	82549262	Galr1	chr18	-	82561887	82576169	3541	5268.54	5647.04	3098.15	1695.69	5087.55	6569.4	5723.37
chr9	106393489	106393750	Iqcf1	chr9	+	106402297	106404581	1	582.742	1102.84	788.11	124.7	373.317	1299.95	1324.17
chr12	33218347	33218913	2010109K11Rik	chr12	+	33063653	33067808	10152	14441.8	6444.95	9665.91	2527.64	7554.91	5341.59	3651.89
chrX	62613333	62613756	Ctag2	chrX	+	62300818	62302192	1181	1	192.876	55.1755	146.282	435.878	170.726	241.425
chrX	62641466	62641855	Ctag2	chrX	+	62300818	62302192	1181	1	192.876	55.1755	146.282	435.878	170.726	241.425
chrX	62013668	62014025	Ctag2	chrX	+	62300818	62302192	1181	1	192.876	55.1755	146.282	435.878	170.726	241.425
chr4	133499599	133500016	Hmgn2	chr4	-	133520653	133523906	10906	14231.2	10549.3	14449.5	6290.48	18724.8	12582.4	5549.08
chr17	35183841	35184322	Msh5	chr17	-	35165549	35183668	21586	23092.3	17557.5	19369.6	12054.4	35772.4	20057.9	16650.7
chr17	3028721	3029366	Msh5	chr17	-	35165549	35183668	21586	23092.3	17557.5	19369.6	12054.4	35772.4	20057.9	16650.7
chr2	58638255	58638723	Upp2	chr2	+	58607595	58643079	392236	42621.5	205241	13558.6	94355.6	277965	136201	479766
chr2	58594350	58594866	Upp2	chr2	+	58607595	58643079	392236	42621.5	205241	13558.6	94355.6	277965	136201	479766
chr2	58608655	58609102	Upp2	chr2	+	58607595	58643079	392236	42621.5	205241	13558.6	94355.6	277965	136201	479766
chr2	58606992	58607623	Upp2	chr2	+	58607595	58643079	392236	42621.5	205241	13558.6	94355.6	277965	136201	479766
chr2	58646697	58647429	Upp2	chr2	+	58607595	58643079	392236	42621.5	205241	13558.6	94355.6	277965	136201	479766
chr2	58627352	58627761	Upp2	chr2	+	58607595	58643079	392236	42621.5	205241	13558.6	94355.6	277965	136201	479766
chr14	61007186	61007459	Fam123a	chr14	+	60997122	60999840	2806	3137.87	1562.61	1545.12	1024.02	2981.82	2541.47	711.461
chr13	23761584	23762004	Hist1h2ac	chr13	-	23773335	23775828	5643	10669.1	14688.9	11417.1	9759.35	28383.3	18536.2	10221.6
chr8	125705246	125705681	Dpep1	chr8	+	125710134	125725713	17028	7450.17	8235	7935.91	5332.2	15302.2	7854.62	9233.66
chr12	82536402	82536828	Adam4	chr12	-	82520535	82522865	1417	1	319.875	336.166	124.7	355.769	510.178	223.539
chrX	90459279	90459567	Arx	chrX	+	90531984	90543694	2833	3463.18	2254.23	1581.48	743.2	2111.68	1783.12	2235.54
chr7	134179789	134180244	Kif22	chr7	-	134171244	134185934	15446	5209.61	14402.4	11790.3	10584.2	30049.9	18007.1	12921.6
chr2	4886083	4886537	Ucma	chr2	+	4897167	4906794	11801	4403.29	4270.89	2917.09	1169.57	3318.66	4896.33	4133.15
chr2	4908457	4909195	Ucma	chr2	+	4897167	4906794	11801	4403.29	4270.89	2917.09	1169.57	3318.66	4896.33	4133.15
chr8	11710400	11710826	Gm6524	chr8	-	11692981	11694514	1	94.5725	220.005	114.167	262.875	745.633	425.315	102.494
chr7	59047368	59047674	Fancf	chr7	-	59115948	59117637	14248	51108.7	20008.9	40589.1	12251.2	34607	17967	9161.7
chr6	52239020	52239412	Evx1	chr6	+	52263491	52268372	5193	4125.36	2262.75	2109.99	1361.7	3817.25	2837.23	1983.88
chr4	72607802	72608079	Aldoart1	chr4	-	72511616	72513668	1	292.469	602.97	256.227	200.236	559.475	528.595	406.977
chr4	72712446	72712912	Aldoart1	chr4	-	72511616	72513668	1	292.469	602.97	256.227	200.236	559.475	528.595	406.977
chr4	72708735	72709392	Aldoart1	chr4	-	72511616	72513668	1	292.469	602.97	256.227	200.236	559.475	528.595	406.977
chr8	37250033	37250544	Lonrf1	chr8	-	37279117	37312570	52779	106303	32903.9	44607.2	25458.7	70872	31151.9	30888.1
chr8	19918105	19918653	6820431F20Rik	chr8	-	19863863	19893010	4721	5700.56	2125.52	2354.87	913.484	2541.99	1643.73	1392.8
chr8	19878440	19879111	6820431F20Rik	chr8	-	19863863	19893010	4721	5700.56	2125.52	2354.87	913.484	2541.99	1643.73	1392.8
chr8	19899121	19899508	6820431F20Rik	chr8	-	19863863	19893010	4721	5700.56	2125.52	2354.87	913.484	2541.99	1643.73	1392.8
chr8	19853761	19854477	6820431F20Rik	chr8	-	19863863	19893010	4721	5700.56	2125.52	2354.87	913.484	2541.99	1643.73	1392.8
chr8	19853139	19853747	6820431F20Rik	chr8	-	19863863	19893010	4721	5700.56	2125.52	2354.87	913.484	2541.99	1643.73	1392.8
chr8	19923772	19927392	6820431F20Rik	chr8	-	19863863	19893010	4721	5700.56	2125.52	2354.87	913.484	2541.99	1643.73	1392.8
chr8	19920646	19921871	6820431F20Rik	chr8	-	19863863	19893010	4721	5700.56	2125.52	2354.87	913.484	2541.99	1643.73	1392.8
chr8	19868997	19869466	6820431F20Rik	chr8	-	19863863	19893010	4721	5700.56	2125.52	2354.87	913.484	2541.99	1643.73	1392.8
chr8	19859745	19860143	6820431F20Rik	chr8	-	19863863	19893010	4721	5700.56	2125.52	2354.87	913.484	2541.99	1643.73	1392.8
chr8	19895215	19895559	6820431F20Rik	chr8	-	19863863	19893010	4721	5700.56	2125.52	2354.87	913.484	2541.99	1643.73	1392.8
chr8	19869781	19870054	6820431F20Rik	chr8	-	19863863	19893010	4721	5700.56	2125.52	2354.87	913.484	2541.99	1643.73	1392.8
chr15	75210370	75210841	9030619P08Rik	chr15	-	75258035	75262259	5429	898.102	3579.27	2973.91	1176.15	3270.98	3061.13	6123.52
chr15	75287905	75288277	9030619P08Rik	chr15	-	75258035	75262259	5429	898.102	3579.27	2973.91	1176.15	3270.98	3061.13	6123.52
chr15	75253606	75254102	9030619P08Rik	chr15	-	75258035	75262259	5429	898.102	3579.27	2973.91	1176.15	3270.98	3061.13	6123.52
chr15	75274959	75275610	9030619P08Rik	chr15	-	75258035	75262259	5429	898.102	3579.27	2973.91	1176.15	3270.98	3061.13	6123.52
chr11	102603436	102603969	Adam11	chr11	+	102622752	102641576	25735	33527.4	20698.5	29118.3	14385.5	39965.2	23046.9	15560.8
chr11	102609762	102610224	Adam11	chr11	+	102622752	102641576	25735	33527.4	20698.5	29118.3	14385.5	39965.2	23046.9	15560.8
chr7	20070696	20071073	Bloc1s3	chr7	-	20091152	20093680	5469	9454.61	7284.15	9929.08	3603.83	10001.7	7576.2	5458.4
chr7	20083600	20083940	Bloc1s3	chr7	-	20091152	20093680	5469	9454.61	7284.15	9929.08	3603.83	10001.7	7576.2	5458.4
chr8	73691175	73691734	Haus8	chr8	-	73775022	73796489	18645	30045.4	21683.6	24203.2	17626.1	48712.7	22598	17165.6
chr8	73693741	73694308	Haus8	chr8	-	73775022	73796489	18645	30045.4	21683.6	24203.2	17626.1	48712.7	22598	17165.6
chr8	73692233	73692898	Haus8	chr8	-	73775022	73796489	18645	30045.4	21683.6	24203.2	17626.1	48712.7	22598	17165.6
chr5	109615504	109615851	Vmn2r13	chr5	-	109585086	109621126	1	749.58	1401.53	856.732	372.1	1024.87	934.493	2436.86
chr12	65141113	65141385	Fscb	chr12	-	65572319	65575885	1	375.29	946.747	566.833	248.4	682.309	340.452	1292.14
chr12	64792289	64792512	Fscb	chr12	-	65572319	65575885	1	375.29	946.747	566.833	248.4	682.309	340.452	1292.14
chr12	64248559	64248720	Fscb	chr12	-	65572319	65575885	1	375.29	946.747	566.833	248.4	682.309	340.452	1292.14
chr12	65501111	65501736	Fscb	chr12	-	65572319	65575885	1	375.29	946.747	566.833	248.4	682.309	340.452	1292.14
chr17	46575398	46575892	Slc22a7	chr17	-	46569133	46575426	21411	18305.8	11632.4	23759.2	15267.4	41790.9	13912.4	12933.6
chr17	36250877	36251228	H2-T10	chr17	-	36254032	36258355	615	1135.42	1454.75	1340.46	827.684	2248.63	610.208	2247.6
chr14	35434561	35434967	Opn4	chr14	-	35403803	35413328	13429	7407.17	6482.04	6515.3	3141.4	8503.63	6862.99	6886.81
chr14	35448711	35449478	Opn4	chr14	-	35403803	35413328	13429	7407.17	6482.04	6515.3	3141.4	8503.63	6862.99	6886.81
chr7	31482605	31482947	2200002J24Rik	chr7	+	31483944	31485553	1	828.022	688.685	397.083	415.79	1117.95	340.452	1077.92
chr12	81708869	81709131	Erh	chr12	-	81735009	81744848	9116	25062.5	11468.6	15186.8	6653.95	17675	10391.1	9283.57
chr3	3021488	3021909	Fam46c	chr3	-	100275458	100293115	28817	45083.1	22040.5	22636.7	10894.2	28589.3	26593.5	21858.9
chr3	100310661	100311081	Fam46c	chr3	-	100275458	100293115	28817	45083.1	22040.5	22636.7	10894.2	28589.3	26593.5	21858.9
chr3	100270170	100270999	Fam46c	chr3	-	100275458	100293115	28817	45083.1	22040.5	22636.7	10894.2	28589.3	26593.5	21858.9
chr3	100289156	100289482	Fam46c	chr3	-	100275458	100293115	28817	45083.1	22040.5	22636.7	10894.2	28589.3	26593.5	21858.9
chr7	49947697	49948088	Gm5595	chr7	-	49915477	49948088	3216	4388.95	4630.92	3795.21	2517.64	6602.37	4292.9	3940.98
chr4	133841906	133842356	Pdik1l	chr4	-	133830920	133843761	23365	56466.7	32662.6	55526.1	21105.3	55033.7	40435.2	22609.3
chr17	35608259	35608656	H2-Q10	chr17	+	35607033	35611508	29385	28931.6	25766.8	23377.9	21868.5	56947.1	25608.3	18411.4
chr17	35617923	35618342	H2-Q10	chr17	+	35607033	35611508	29385	28931.6	25766.8	23377.9	21868.5	56947.1	25608.3	18411.4
chr17	35609343	35609821	H2-Q10	chr17	+	35607033	35611508	29385	28931.6	25766.8	23377.9	21868.5	56947.1	25608.3	18411.4
chr17	35622665	35622972	H2-Q10	chr17	+	35607033	35611508	29385	28931.6	25766.8	23377.9	21868.5	56947.1	25608.3	18411.4
chr6	76284601	76284937	Lrrtm1	chr6	+	77192710	77195511	1	3530.08	1701.14	1364.3	681.35	1769.5	1528.53	1696.45
chr6	76311690	76311964	Lrrtm1	chr6	+	77192710	77195511	1	3530.08	1701.14	1364.3	681.35	1769.5	1528.53	1696.45
chr6	75509450	75509857	Lrrtm1	chr6	+	77192710	77195511	1	3530.08	1701.14	1364.3	681.35	1769.5	1528.53	1696.45
chr4	122655932	122656665	Mycl1	chr4	+	122673341	122679723	15445	4639.81	7726.87	6978.57	3338.53	8643.63	5449.21	8308.56
chr4	122671316	122671563	Mycl1	chr4	+	122673341	122679723	15445	4639.81	7726.87	6978.57	3338.53	8643.63	5449.21	8308.56
chr17	8145107	8145416	Rsph3a	chr17	+	8138478	8172421	237	740.024	1506.25	1837.43	717.933	1850	1584.15	1143.64
chr8	77626828	77627175	Mcm5	chr8	+	77633426	77652338	4721	5608.98	10874.5	7305.79	12527.1	32113.3	12640.2	11801.8
chr8	77683637	77683900	Mcm5	chr8	+	77633426	77652338	4721	5608.98	10874.5	7305.79	12527.1	32113.3	12640.2	11801.8
chr7	117277471	117277722	Wee1	chr7	+	117265572	117286813	34457	10652.7	12873.4	7308.19	8199.67	20920.9	11492.5	17467.2
chr5	37115233	37115933	Cno	chr5	-	37138612	37139918	19525	35330.4	12741.2	19550.7	7709.35	19651.4	12728.7	6434.24
chr17	35262378	35262878	D17H6S53E	chr17	+	35264059	35264941	735	3144.64	3306	4247.64	1667.26	4249.45	4958.45	1416.51
chr3	10007537	10007952	Fabp5	chr3	+	10012605	10016610	1201	15092.1	16739.8	2723.26	5063.22	12862.3	34443.8	5089.03
chr3	10009291	10009803	Fabp5	chr3	+	10012605	10016610	1201	15092.1	16739.8	2723.26	5063.22	12862.3	34443.8	5089.03
chr3	10040792	10041254	Fabp5	chr3	+	10012605	10016610	1201	15092.1	16739.8	2723.26	5063.22	12862.3	34443.8	5089.03
chr11	120201041	120201567	Actg1	chr11	-	120207003	120209798	65945	130700	47884.6	39411.9	25966.4	65715.3	39077.4	16587
chr4	109314226	109314487	Cdkn2c	chr4	-	109333480	109337977	3515	1370.74	3890.41	2674.38	2336.56	5890.17	3027.54	6089.41
chr4	109312648	109313358	Cdkn2c	chr4	-	109333480	109337977	3515	1370.74	3890.41	2674.38	2336.56	5890.17	3027.54	6089.41
chr4	109337504	109337915	Cdkn2c	chr4	-	109333480	109337977	3515	1370.74	3890.41	2674.38	2336.56	5890.17	3027.54	6089.41
chr7	19685625	19685971	Six5	chr7	+	19679892	19683694	8843	9918.49	11029.5	25147.1	6948.46	17488.1	14603.6	5373.13
chr3	65384643	65385123	4931440P22Rik	chr3	-	65331406	65333336	28855	262102	49660.9	97332.2	26626.8	67001.2	50157.9	21877.2
chrX	92145705	92146066	Spin4	chrX	-	92217845	92222021	4413	12519.8	7299.48	8009.34	4703.18	11813.7	8751.28	3243
chrX	92175423	92175792	Spin4	chrX	-	92217845	92222021	4413	12519.8	7299.48	8009.34	4703.18	11813.7	8751.28	3243
chr11	78136489	78136928	Aldoc	chr11	+	78137699	78140262	386	3014.43	2188.17	1172.88	1483.56	3724.17	2372.11	2440.61
chr1	71125803	71126321	Bard1	chr1	-	71074108	71149546	11093	18574.6	30740.3	18566.6	24462	61163.2	36058.4	35099.3
chr14	50918507	50918906	Olfr733	chr14	-	50918011	50919005	1	1	85.6664	6.29716	186.55	466.396	131.003	119.965
chr7	105533612	105534170	Tsku	chr7	-	105499177	105509838	183581	187244	153712	491421	151322	377625	165754	56387.4
chr7	105495856	105496364	Tsku	chr7	-	105499177	105509838	183581	187244	153712	491421	151322	377625	165754	56387.4
chr17	25834952	25835445	Gng13	chr17	+	25854116	25856047	1	2401.24	1009.66	1329.62	1874.66	4664.11	983.245	951.886
chr17	25813885	25814287	Gng13	chr17	+	25854116	25856047	1	2401.24	1009.66	1329.62	1874.66	4664.11	983.245	951.886
chr5	91212956	91213225	Cxcl3	chr5	+	91215128	91217116	640	281.718	259.98	512.658	294.458	731.138	101.752	403.234
chr11	18231705	18232309	Etaa1	chr11	-	17838751	17853878	3205	11901.8	12797.4	15089.7	11681.2	28813.6	14254.7	10950.3
chr11	17563933	17564459	Etaa1	chr11	-	17838751	17853878	3205	11901.8	12797.4	15089.7	11681.2	28813.6	14254.7	10950.3
chr11	100081968	100082384	Krt14	chr11	-	100064475	100068824	5429	2808.18	1973.1	1840.32	1197.99	2947.49	1273.95	2210.17
chr4	140564977	140565624	Mfap2	chr4	+	140566338	140571899	11329	10683	4991.34	8015.85	4734.76	11626.7	5730.16	3969.68
chr7	101792319	101792697	Fam181b	chr7	+	100228388	100230231	1	1103.96	1007.95	456.556	433.95	1064.54	1485.56	826.682
chr7	100194430	100194694	Fam181b	chr7	+	100228388	100230231	1	1103.96	1007.95	456.556	433.95	1064.54	1485.56	826.682
chr7	100234709	100235195	Fam181b	chr7	+	100228388	100230231	1	1103.96	1007.95	456.556	433.95	1064.54	1485.56	826.682
chr16	32666635	32667020	Gm10818	chr16	-	32665308	32668283	10201	5899.26	3696.31	4253.66	3155.35	7739.54	5232.9	2057.09
chr16	32688804	32689486	Gm10818	chr16	-	32665308	32668283	10201	5899.26	3696.31	4253.66	3155.35	7739.54	5232.9	2057.09
chr4	148827832	148828213	Rbp7	chr4	-	148823810	148829077	4957	2418.76	1732.47	1393.91	1129.3	2755.99	1421.28	2399.43
chr11	78141259	78141568	Pigs	chr11	+	78141923	78156278	16685	9372.59	10251.7	10274.6	5065.59	12360.3	7414.42	12206.5
chr15	76758186	76758510	Zfp647	chr15	-	76740799	76755878	9515	17005.7	15119.3	17191.7	9389.56	22876.4	16691.6	10812.6
chr15	76762802	76763219	Zfp647	chr15	-	76740799	76755878	9515	17005.7	15119.3	17191.7	9389.56	22876.4	16691.6	10812.6
chr8	73203938	73204269	Lsm4	chr8	+	73197129	73202651	12117	20436.8	14819.7	18726.7	9503.26	23078.2	14758.9	10401.7
chr19	39360194	39360556	Cyp2c29	chr19	+	39361574	39405203	17984	3276.04	21679.5	23933.1	53311.5	129291	27079.5	29364.1
chr6	83030164	83030599	Pcgf1	chr6	+	83028383	83030849	4620	2124.5	2902.07	4012.88	1311.96	3171.41	2205.99	2465.57
chr15	31383243	31384027	Ropn1l	chr15	-	31370964	31383444	29210	22714.8	25573.7	54706.2	20139.3	48555.5	29347	22489.1
chr6	64618285	64618576	Atoh1	chr6	+	64679139	64681229	945	1446.8	739.537	557.443	269.455	649.503	572.291	811.291
chr14	69770471	69770836	Nkx2-6	chr14	+	69790075	69793597	28459	8626	6783.49	11723.9	8916.34	21479	9877.25	7004.53
chr14	69779929	69780626	Nkx2-6	chr14	+	69790075	69793597	28459	8626	6783.49	11723.9	8916.34	21479	9877.25	7004.53
chr13	94418710	94419196	Bhmt	chr13	-	94386845	94407713	148321	140932	74511	957342	173563	417457	74265.2	111340
chr12	73184243	73184521	2810055F11Rik	chr12	-	73174414	73186300	24865	25760.1	18411	25698	16916.3	40394.3	19110.7	17529.2
chr16	90687498	90687807	2610039C10Rik	chr16	-	90719556	90727616	9595	13473.5	9004.87	9775.95	8112.56	19225.7	11842.1	6408.87
chr11	35607448	35607874	Fbll1	chr11	-	35610881	35612386	1	1070.12	566.666	682.167	181.023	427.486	425.315	616.622
chr6	38483218	38484120	1110001J03Rik	chr6	+	38484860	38489449	1543	2683.15	3364.98	4891.48	3239.83	7639.6	3676.83	3012.97
chr6	38490659	38490921	1110001J03Rik	chr6	+	38484860	38489449	1543	2683.15	3364.98	4891.48	3239.83	7639.6	3676.83	3012.97
chr2	103969763	103970579	A930018P22Rik	chr2	+	103962925	103964903	2185	960.616	1255.66	1319.03	1172.2	2761.71	1336.06	1339.14
chr17	28692292	28692553	Clps	chr17	-	28695158	28697659	1181	2265.46	1634.3	509.527	555.544	1304.11	947.133	1999.69
chr17	28702120	28702451	Clps	chr17	-	28695158	28697659	1181	2265.46	1634.3	509.527	555.544	1304.11	947.133	1999.69
chr2	20928949	20929395	Gm13375	chr2	+	20890500	20891975	30225	25453.1	19082.4	37704.5	16416.8	38455.3	23078.3	6628.91
chr6	28374989	28375378	Arf5	chr6	+	28373639	28376499	13889	7055.57	5209.29	7820.57	3922.29	9173.88	6248.73	4055.37
chr14	27590170	27590429	Pde12	chr14	-	27483602	27489332	10345	32905.1	14942.7	22840.2	11031.3	25717.2	18403.3	7947.93
chr4	140918911	140919370	Fam131c	chr4	+	140924134	140940090	3305	13525.6	10961.6	8254.46	6177.57	14372.2	12274.7	9085.99
chr4	132038747	132039048	Med18	chr4	-	132014643	132019836	10691	11879.9	8505.52	12523.7	6097.04	14171.5	9686.58	7720.39
chr4	132040640	132041149	Med18	chr4	-	132014643	132019836	10691	11879.9	8505.52	12523.7	6097.04	14171.5	9686.58	7720.39
chr18	56879660	56880076	Lmnb1	chr18	+	56867466	56913079	37682	19150.3	31535.8	19419.7	27428.4	63719.4	36445.9	35256.6
chr10	51763851	51764172	Vgll2	chr10	+	51742491	51748277	945	1685.31	2291.19	906.333	642.397	1490.27	2258	1624.91
chr10	51616038	51616467	Vgll2	chr10	+	51742491	51748277	945	1685.31	2291.19	906.333	642.397	1490.27	2258	1624.91
chr1	182935518	182936047	Ephx1	chr1	-	182919686	182947626	172745	43847.1	77234.1	124567	62591.1	144601	91739.4	86175.5
chr1	182911324	182911838	Ephx1	chr1	-	182919686	182947626	172745	43847.1	77234.1	124567	62591.1	144601	91739.4	86175.5
chr2	155566307	155566574	Procr	chr2	+	155576952	155581214	2009	1872.45	2002.46	1755.08	928.749	2141.82	1097	2756.32
chr2	155575600	155576007	Procr	chr2	+	155576952	155581214	2009	1872.45	2002.46	1755.08	928.749	2141.82	1097	2756.32
chr4	74695586	74695958	3110001D03Rik	chr4	-	74923257	74924190	4770	6067.69	4647.04	5422.16	3731.74	8605.48	4549.3	2928.95
chr4	75223422	75223693	3110001D03Rik	chr4	-	74923257	74924190	4770	6067.69	4647.04	5422.16	3731.74	8605.48	4549.3	2928.95
chr5	120847789	120848164	Lhx5	chr5	+	120881894	120891466	4013	7456.14	4476.13	3437.89	1689.64	3896.21	3903.26	4374.41
chr4	154282676	154282948	2810405K02Rik	chr4	-	154270538	154273152	24888	14468.5	6481.91	11042.5	8802.12	20235	7153.69	5888.09
chr16	93929687	93930280	Chaf1b	chr16	+	93884145	93906351	14397	11261.6	12482.1	7884.38	11847	27210.6	12157	14891.6
chr11	40638697	40638982	Ccng1	chr11	-	40562053	40568788	35696	43166.2	32609.4	45586.4	20501	47054.8	39823.8	21361.4
chr8	73116469	73116819	Isyna1	chr8	+	73118379	73121189	2125	16688.4	10551	8872.3	4326.02	9919.66	16262.6	4089.48
chr5	108880018	108880547	Mfsd7a	chr5	-	108870072	108877910	10349	7010.98	7755.18	8784.66	5566.71	12727.3	8789.56	7206.27
chr5	108883150	108883672	Mfsd7a	chr5	-	108870072	108877910	10349	7010.98	7755.18	8784.66	5566.71	12727.3	8789.56	7206.27
chr14	26506038	26506414	Ppif	chr14	+	26513655	26519952	15226	14921.2	9559.13	10757.1	6997.68	15970.6	9090.37	8504.48
chr14	56196523	56196959	Psme1	chr14	+	56197330	56200364	20193	4302.15	6904.19	9245.27	5957.02	13584.1	7401.06	7576.89
chr16	91312998	91313355	Olig1	chr16	+	91270013	91272184	6830	8622.02	3313.87	2741.8	2538.69	5778.78	3225.07	2548.34
chr16	91297559	91297951	Olig1	chr16	+	91270013	91272184	6830	8622.02	3313.87	2741.8	2538.69	5778.78	3225.07	2548.34
chr16	91271870	91272239	Olig1	chr16	+	91270013	91272184	6830	8622.02	3313.87	2741.8	2538.69	5778.78	3225.07	2548.34
chr1	171096606	171096944	Nuf2	chr1	-	171428064	171461595	6751	7790.62	13439.8	5914.32	9442.46	21453.8	13875.2	15826.2
chr13	4001026	4001345	Ucn3	chr13	-	3939933	3944595	1	741.617	2353.97	660.497	616.078	1397.19	2313.61	2365.74
chr19	9805906	9806250	Incenp	chr19	-	9946786	9974023	17159	15335	21937.5	14750.7	20212.3	45722.7	31196.3	18998.3
chr19	9995360	9995608	Incenp	chr19	-	9946786	9974023	17159	15335	21937.5	14750.7	20212.3	45722.7	31196.3	18998.3
chr19	9985715	9986130	Incenp	chr19	-	9946786	9974023	17159	15335	21937.5	14750.7	20212.3	45722.7	31196.3	18998.3
chr7	51555435	51555689	Clec11a	chr7	-	51559135	51562329	24073	74769.8	32029.5	55205.6	26020.1	58830.1	35041.9	15846.2
chr2	32111682	32112127	Uck1	chr2	-	32110521	32115625	19383	32097.2	17938.1	26374.1	15104.2	34136.6	16454	11506.1
chr13	22132232	22132844	Hist1h4i	chr13	-	22132684	22133221	2578	3918.7	3294.21	3028.09	2509.21	5670.06	4103.68	2349.51
chr9	42068652	42068966	Sc5d	chr9	-	42062259	42072383	80642	43566.8	54218.3	92253	40341.7	91022.1	61670.4	55711
chr9	42079287	42079808	Sc5d	chr9	-	42062259	42072383	80642	43566.8	54218.3	92253	40341.7	91022.1	61670.4	55711
chr9	42087833	42088200	Sc5d	chr9	-	42062259	42072383	80642	43566.8	54218.3	92253	40341.7	91022.1	61670.4	55711
chr9	42083090	42083692	Sc5d	chr9	-	42062259	42072383	80642	43566.8	54218.3	92253	40341.7	91022.1	61670.4	55711
chr11	68854307	68854969	Aurkb	chr11	+	68859144	68865164	8089	3676.61	4949.66	4703.43	3571.98	8034.8	5643.49	5405.57
chrX	93136155	93136552	Las1l	chrX	-	93130651	93152298	18130	68097.9	30721.7	42483.8	21261.3	47785.7	32353	20518.7
chrX	93166076	93166484	Las1l	chrX	-	93130651	93152298	18130	68097.9	30721.7	42483.8	21261.3	47785.7	32353	20518.7
chrX	5683926	5684239	AU022751	chrX	-	5658335	5660538	1653	1064.94	623.809	731.286	124.7	280.238	790.407	730.179
chr4	46440841	46441238	Anp32b	chr4	+	46463988	46485395	19447	40939.2	27748.6	33795.9	18424.9	41243.5	30393.2	19687.6
chr15	82049019	82049355	Tnfrsf13c	chr15	-	82052173	82054766	2338	2005.44	1154.09	1354.42	396.05	884.871	727.572	1364.52
chr18	62255709	62256105	Adrb2	chr18	-	62337469	62339613	11406	87070.8	18027.5	33633.9	11389.8	25421.5	17248.1	10166.7
chr18	62231022	62231403	Adrb2	chr18	-	62337469	62339613	11406	87070.8	18027.5	33633.9	11389.8	25421.5	17248.1	10166.7
chr18	62228799	62229468	Adrb2	chr18	-	62337469	62339613	11406	87070.8	18027.5	33633.9	11389.8	25421.5	17248.1	10166.7
chr18	62391091	62391618	Adrb2	chr18	-	62337469	62339613	11406	87070.8	18027.5	33633.9	11389.8	25421.5	17248.1	10166.7
chr7	3287178	3287720	Myadm	chr7	+	3289038	3299350	33197	90357	43544	59627.3	32509.1	72480.3	54438.7	26101.7
chr3	27052825	27053235	Ect2	chr3	-	26996143	27052800	14869	11285.1	29034.4	13493.1	20788.1	46285.4	44910.9	25545.5
chr15	77240546	77240907	Apol9a	chr15	-	77234218	77241510	945	1121.88	1878.47	2012.96	1485.4	3306.84	2122.58	2297.93
chr13	58224640	58224975	Hnrnpa0	chr13	-	58227239	58229917	21126	46880.4	15266.2	33481.5	8165.2	18177	17715.7	6840.22
chr13	58553642	58553955	Rmi1	chr13	+	58503608	58512510	24887	18698.8	15779.2	20708.1	9630.38	21393.6	17180.2	12243.1
chr13	58541098	58541406	Rmi1	chr13	+	58503608	58512510	24887	18698.8	15779.2	20708.1	9630.38	21393.6	17180.2	12243.1
chr11	68886939	68887367	Tmem107	chr11	+	68884310	68886795	220	1631.55	3240.87	2499.82	2252.87	4993.32	1991.85	4472.99
chr11	118837348	118837769	Enpp7	chr11	+	118849501	118854155	7247	5300.39	2815.31	3311.97	1402.49	3106.56	2759.95	3065.38
chr9	57134926	57135573	1700017B05Rik	chr9	-	57100128	57110406	17086	132744	32246.3	44732.6	28723.1	63440.2	29536.2	16997.1
chr4	94899604	94900037	Jun	chr4	-	94715726	94718913	247431	304220	99258.7	134268	61446.7	135489	114651	49976.6
chr4	94810187	94810883	Jun	chr4	-	94715726	94718913	247431	304220	99258.7	134268	61446.7	135489	114651	49976.6
chr4	94950315	94950911	Jun	chr4	-	94715726	94718913	247431	304220	99258.7	134268	61446.7	135489	114651	49976.6
chr4	94823612	94824042	Jun	chr4	-	94715726	94718913	247431	304220	99258.7	134268	61446.7	135489	114651	49976.6
chr4	94828208	94828740	Jun	chr4	-	94715726	94718913	247431	304220	99258.7	134268	61446.7	135489	114651	49976.6
chr4	94808003	94808336	Jun	chr4	-	94715726	94718913	247431	304220	99258.7	134268	61446.7	135489	114651	49976.6
chr5	93913937	93914311	C87414	chr5	-	94064210	94100489	945	468.863	1999.18	906.333	802.944	1769.5	1189.08	3147.33
chr5	93913209	93913578	C87414	chr5	-	94064210	94100489	945	468.863	1999.18	906.333	802.944	1769.5	1189.08	3147.33
chr5	94009420	94009833	C87414	chr5	-	94064210	94100489	945	468.863	1999.18	906.333	802.944	1769.5	1189.08	3147.33
chr5	93950578	93951003	C87414	chr5	-	94064210	94100489	945	468.863	1999.18	906.333	802.944	1769.5	1189.08	3147.33
chr4	148523676	148524136	Apitd1	chr4	-	148502457	148511709	10621	8624.41	6779.16	4952.88	5931.75	13052.7	8222.96	4484.22
chr11	120990951	120991346	Tex19.2	chr11	-	120977528	120979991	473	1887.18	1552.52	638.586	805.05	1769.5	1783.12	1010.95
chr12	88256571	88256876	6430527G18Rik	chr12	-	88221652	88225764	87018	132107	44116.3	62352.7	27543.4	60538.7	46157.5	22077.7
chr12	88230228	88230939	6430527G18Rik	chr12	-	88221652	88225764	87018	132107	44116.3	62352.7	27543.4	60538.7	46157.5	22077.7
chr12	88174558	88175149	6430527G18Rik	chr12	-	88221652	88225764	87018	132107	44116.3	62352.7	27543.4	60538.7	46157.5	22077.7
chr4	61505765	61506279	Mup5	chr4	-	61492352	61496214	945	227.167	1161.43	283.917	647.398	1422.36	679.904	2194.78
chr4	61586953	61587214	Mup5	chr4	-	61492352	61496214	945	227.167	1161.43	283.917	647.398	1422.36	679.904	2194.78
chr4	61483577	61484019	Mup5	chr4	-	61492352	61496214	945	227.167	1161.43	283.917	647.398	1422.36	679.904	2194.78
chr4	61567542	61567992	Mup5	chr4	-	61492352	61496214	945	227.167	1161.43	283.917	647.398	1422.36	679.904	2194.78
chr10	59406365	59406906	Ddit4	chr10	-	59412422	59414518	52655	457311	84263.7	137157	41481.3	91094.6	55949.6	33443.4
chr10	59403484	59403987	Ddit4	chr10	-	59412422	59414518	52655	457311	84263.7	137157	41481.3	91094.6	55949.6	33443.4
chr4	55780068	55780306	Klf4	chr4	-	55540008	55545347	6611	17354.9	4595.66	6303.66	3895.44	8549.41	5758.69	2886.93
chr4	55971960	55972346	Klf4	chr4	-	55540008	55545347	6611	17354.9	4595.66	6303.66	3895.44	8549.41	5758.69	2886.93
chr4	55549871	55550538	Klf4	chr4	-	55540008	55545347	6611	17354.9	4595.66	6303.66	3895.44	8549.41	5758.69	2886.93
chr4	55951219	55951725	Klf4	chr4	-	55540008	55545347	6611	17354.9	4595.66	6303.66	3895.44	8549.41	5758.69	2886.93
chr4	55617762	55618165	Klf4	chr4	-	55540008	55545347	6611	17354.9	4595.66	6303.66	3895.44	8549.41	5758.69	2886.93
chr4	55584188	55584686	Klf4	chr4	-	55540008	55545347	6611	17354.9	4595.66	6303.66	3895.44	8549.41	5758.69	2886.93
chr3	94484707	94485166	Selenbp2	chr3	+	94497494	94508328	8969	10701.7	9895.3	2655.84	9889.36	21691.1	15726.3	3724.26
chr10	90776093	90776543	Tmpo	chr10	-	90610315	90634327	24228	29895.6	35564.9	37679.2	30815.7	67571.1	49888.2	25833
chr10	90632140	90632438	Tmpo	chr10	-	90610315	90634327	24228	29895.6	35564.9	37679.2	30815.7	67571.1	49888.2	25833
chr10	91017955	91018369	Tmpo	chr10	-	90610315	90634327	24228	29895.6	35564.9	37679.2	30815.7	67571.1	49888.2	25833
chr14	62213953	62214370	Trim13	chr14	+	62217062	62224782	11069	24759.5	14372.5	19200.6	10373.6	22744	17133.6	10086
chr10	116470793	116471305	Lrrc10	chr10	+	116482396	116483824	1889	1088.03	811.36	753.438	652.662	1430.76	736.239	868.278
chr5	115617234	115617887	Cabp1	chr5	-	115618699	115636130	6609	9667.64	8665.54	6078.29	4456.83	9765.16	7748.09	10048.9
chr4	106761662	106761924	Cdcp2	chr4	+	106769495	106780353	4485	9527.48	6815.33	4584.97	3771.74	8262.54	8034.1	5759.56
chr11	106888423	106888823	1810010H24Rik	chr11	+	106889536	106891756	4351	2295.72	4563.16	5191.01	2614.75	5723.08	4012.67	6154.3
chr5	114583850	114584289	Ung	chr5	+	114580443	114589330	23018	132066	43019.4	54458.7	26265.9	57420.6	39029	21111.4
chr2	25320836	25321227	BC029214	chr2	-	25315007	25316614	21245	27868.1	12924	25890.4	14045.2	30687.4	13088.7	11014
chr6	58877668	58878217	Nap1l5	chr6	-	58855226	58857120	945	1093.21	841.504	1266.54	976.65	2133.81	894.77	462.716
chr2	36196084	36196467	Olfr338	chr2	+	36232297	36233218	1	1	77.9337	1	17.3179	37.6213	1	161.561
chr6	67057541	67057953	Gadd45a	chr6	-	66985089	66987401	67171	141331	30901.4	41910.5	21962.2	47599.2	40881.5	19197.6
chr6	67052538	67053270	Gadd45a	chr6	-	66985089	66987401	67171	141331	30901.4	41910.5	21962.2	47599.2	40881.5	19197.6
chr6	67099444	67100103	Gadd45a	chr6	-	66985089	66987401	67171	141331	30901.4	41910.5	21962.2	47599.2	40881.5	19197.6
chr6	67096099	67096513	Gadd45a	chr6	-	66985089	66987401	67171	141331	30901.4	41910.5	21962.2	47599.2	40881.5	19197.6
chr16	10849926	10850410	A630055G03Rik	chr16	+	10835151	10843328	3541	4118.19	3324.88	3452.58	3538.82	7657.91	2529.92	4693.87
chr16	10881130	10881597	A630055G03Rik	chr16	+	10835151	10843328	3541	4118.19	3324.88	3452.58	3538.82	7657.91	2529.92	4693.87
chr16	10832622	10832891	A630055G03Rik	chr16	+	10835151	10843328	3541	4118.19	3324.88	3452.58	3538.82	7657.91	2529.92	4693.87
chr5	147408110	147408660	Gpr12	chr5	-	147393725	147396815	3777	1966.02	1359.2	1399.45	915.59	1978.55	1276.11	1218.93
chr5	147477984	147478407	Gpr12	chr5	-	147393725	147396815	3777	1966.02	1359.2	1399.45	915.59	1978.55	1276.11	1218.93
chr16	21780928	21781754	Ehhadh	chr16	-	21761357	21787907	59920	33725.3	31374.2	73294.9	30353.3	65429.9	37304.6	31307.8
chr16	21782653	21783401	Ehhadh	chr16	-	21761357	21787907	59920	33725.3	31374.2	73294.9	30353.3	65429.9	37304.6	31307.8
chr16	21788488	21788867	Ehhadh	chr16	-	21761357	21787907	59920	33725.3	31374.2	73294.9	30353.3	65429.9	37304.6	31307.8
chr11	83391992	83392369	Ccl9	chr11	-	83386418	83392138	6585	2177.06	5494.09	4675.5	3597.77	7738.02	6866.6	5436.77
chr13	100557454	100557821	Cartpt	chr13	-	100668438	100670638	2199	343.834	849.237	352.539	321.041	688.031	760.795	674.856
chr12	70467391	70467768	Arf6	chr12	+	70473136	70476967	4483	7410.75	8042.73	8712.9	5588.03	11970.1	8212.49	5870.62
chr12	70468536	70469051	Arf6	chr12	+	70473136	70476967	4483	7410.75	8042.73	8712.9	5588.03	11970.1	8212.49	5870.62
chrX	71161227	71161553	Naa10	chrX	-	71162208	71167283	6335	11099.1	7071.56	11941	7573.8	16221.2	8424.47	5104
chr9	108815972	108816408	Tmem89	chr9	+	108816949	108817894	3953	1424.9	310.308	580.798	396.577	848.631	419.898	1
chr6	87947172	87947645	Gm5577	chr6	+	87931676	87934174	1	1380.7	1361.3	1160.84	866.899	1854.95	1431.75	1557.11
chr18	60764222	60765030	Synpo	chr18	-	60753643	60783959	83420	266160	132151	184129	89477.9	191303	93712.5	59999.1
chr18	60765612	60766068	Synpo	chr18	-	60753643	60783959	83420	266160	132151	184129	89477.9	191303	93712.5	59999.1
chr11	95944879	95945137	Atp5g1	chr11	-	95934106	95937008	54841	163234	46447.3	70716.2	35998.2	76930.6	50741.5	27786.3
chr8	121954011	121954528	Osgin1	chr8	+	121961061	121970156	552661	253342	297650	645359	295992	631843	480654	256933
chr8	121956251	121956816	Osgin1	chr8	+	121961061	121970156	552661	253342	297650	645359	295992	631843	480654	256933
chr8	121958366	121958851	Osgin1	chr8	+	121961061	121970156	552661	253342	297650	645359	295992	631843	480654	256933
chr6	3000424	3000895	Gm8579	chr6	+	3238518	3267019	1181	281.718	1106.12	510.25	743.2	1583.35	1019.36	1421.92
chr6	3197984	3198502	Gm8579	chr6	+	3238518	3267019	1181	281.718	1106.12	510.25	743.2	1583.35	1019.36	1421.92
chr6	3257782	3258262	Gm8579	chr6	+	3238518	3267019	1181	281.718	1106.12	510.25	743.2	1583.35	1019.36	1421.92
chr7	133497497	133497860	Lat	chr7	-	133507341	133513048	1889	5686.63	5404.05	5087	2876.63	6123.25	5231.45	5168.48
chr7	152115311	152115960	Ccnd1	chr7	-	152115835	152125830	66197	43455.7	53445.9	62302.1	35552.9	75613.7	68236.7	51317.6
chr10	121847991	121848411	Avpr1a	chr10	+	121885554	121890509	10203	11468.6	10724.7	20518.8	9501.68	20198.4	17162.1	6289.91
chr10	121944911	121945179	Avpr1a	chr10	+	121885554	121890509	10203	11468.6	10724.7	20518.8	9501.68	20198.4	17162.1	6289.91
chr10	121816062	121816611	Avpr1a	chr10	+	121885554	121890509	10203	11468.6	10724.7	20518.8	9501.68	20198.4	17162.1	6289.91
chr10	121891317	121891668	Avpr1a	chr10	+	121885554	121890509	10203	11468.6	10724.7	20518.8	9501.68	20198.4	17162.1	6289.91
chr10	121745724	121746287	Avpr1a	chr10	+	121885554	121890509	10203	11468.6	10724.7	20518.8	9501.68	20198.4	17162.1	6289.91
chr10	121817006	121817466	Avpr1a	chr10	+	121885554	121890509	10203	11468.6	10724.7	20518.8	9501.68	20198.4	17162.1	6289.91
chr10	121763954	121764300	Avpr1a	chr10	+	121885554	121890509	10203	11468.6	10724.7	20518.8	9501.68	20198.4	17162.1	6289.91
chr2	157979497	157980060	Tgm2	chr2	-	157942140	157972128	73410	516558	208803	201042	106832	226994	158778	75885.9
chr2	157947893	157948288	Tgm2	chr2	-	157942140	157972128	73410	516558	208803	201042	106832	226994	158778	75885.9
chr2	157981332	157981722	Tgm2	chr2	-	157942140	157972128	73410	516558	208803	201042	106832	226994	158778	75885.9
chr2	157985243	157985648	Tgm2	chr2	-	157942140	157972128	73410	516558	208803	201042	106832	226994	158778	75885.9
chr2	157982647	157983072	Tgm2	chr2	-	157942140	157972128	73410	516558	208803	201042	106832	226994	158778	75885.9
chr11	29515461	29515883	Rps27a	chr11	-	29445841	29448040	25371	71477.7	34462.2	42622.2	24592.3	52207.7	33458.3	19705.5
chr11	6177055	6177467	Tmed4	chr11	-	6170716	6174840	21365	59250.3	29725.9	51182.2	18537	39313.2	23556.1	14933.6
chr5	135456942	135457510	Cldn3	chr5	+	135462083	135463346	35811	7558.48	7334.34	12046.3	5121.91	10862.3	8398.83	3947.63
chr4	155153364	155153731	Vwa1	chr4	-	155142603	155148670	25954	33554.5	18852.4	30418.3	14821.6	31425.1	15030.8	12576.7
chr6	86559217	86559597	Asprv1	chr6	+	86578167	86579698	628	562.435	878.333	1171.67	264.191	559.475	922.938	943.982
chr2	19569238	19569476	Gm3230	chr2	-	19577432	19579524	30006	43267.4	29095.2	55316.8	29729.3	62864.9	40247	20712.5
chr2	19549216	19549564	Gm3230	chr2	-	19577432	19579524	30006	43267.4	29095.2	55316.8	29729.3	62864.9	40247	20712.5
chr4	41584178	41584618	Enho	chr4	-	41585176	41587335	23512	6617.57	13488.8	31882.2	11554	24418.6	21728.1	11209.1
chr4	116874996	116875310	Kif2c	chr4	-	116832240	116855229	7616	11934.9	14968.9	8546.77	12478.1	26355.4	21125.4	12407
chr4	116883365	116883628	Kif2c	chr4	-	116832240	116855229	7616	11934.9	14968.9	8546.77	12478.1	26355.4	21125.4	12407
chr4	116862126	116863165	Kif2c	chr4	-	116832240	116855229	7616	11934.9	14968.9	8546.77	12478.1	26355.4	21125.4	12407
chr4	116842456	116842837	Kif2c	chr4	-	116832240	116855229	7616	11934.9	14968.9	8546.77	12478.1	26355.4	21125.4	12407
chrX	7685124	7685523	Gm6787	chrX	+	7674212	7683827	1417	188.145	1305.6	906.333	837.948	1769.5	849.63	1756.35
chr8	55392054	55392374	Spcs3	chr8	-	55605786	55615351	36484	66269.5	29522.6	66407.9	16291.2	34397.6	27773.6	10954.9
chr1	195097373	195097895	G0s2	chr1	-	195098353	195099382	127951	75779.6	39977.7	186041	51673.4	109063	40765.2	30703.5
chr8	112089464	112090036	Dhx38	chr8	-	112071923	112089501	38983	45174.6	34556.2	39752.1	19210.8	40500	34282.8	20198.8
chr11	117689963	117690360	Tk1	chr11	-	117676832	117687328	97351	34701.7	42659.2	71652.1	54130.2	113838	55132	34770.3
chr7	151172146	151172597	Dhcr7	chr7	+	151009071	151034315	57585	57385.7	69144.2	114270	58889.3	123842	71761.5	57809.9
chr12	56383016	56383357	Ppp2r3c	chr12	-	56381800	56403987	15638	21042.5	17617.6	19854.5	12981.9	27274.3	19269.6	12215.7
chr5	33553110	33553529	Spon2	chr5	-	33556166	33560887	8733	6223.77	4800.25	14044	3239.57	6789.68	6647.4	2893.17
chr5	33564449	33564972	Spon2	chr5	-	33556166	33560887	8733	6223.77	4800.25	14044	3239.57	6789.68	6647.4	2893.17
chr5	33561266	33561765	Spon2	chr5	-	33556166	33560887	8733	6223.77	4800.25	14044	3239.57	6789.68	6647.4	2893.17
chr5	38251967	38252400	Msx1	chr5	-	38211729	38215824	3513	6286.69	3781.5	3855.65	2637.12	5522.05	4677.86	2840.76
chr11	102113851	102114118	BC030867	chr11	+	102110195	102126497	16049	11603.2	10318.5	7568.24	7163.49	14996.7	12309	8744.91
chr11	102102435	102102938	BC030867	chr11	+	102110195	102126497	16049	11603.2	10318.5	7568.24	7163.49	14996.7	12309	8744.91
chr11	116295653	116296226	Gm7367	chr11	+	116295526	116300345	24291	14541.8	15262.2	18065	9363.51	19583.1	18825.4	12501.4
chr7	152268287	152268739	1810010D01Rik	chr7	-	152391722	152394024	1	1945.32	898.778	1887.27	746.884	1561.6	602.986	1387.81
chrX	97790218	97790605	P2ry4	chrX	-	97785492	97790208	1181	3133.89	3354.37	3750.19	2453.94	5115.4	3831.75	3897.72
chr1	174374959	174375315	Slamf9	chr1	+	174405490	174408540	1	225.972	916.472	769.088	372.1	775.388	849.63	1117.02
chr1	174362438	174362768	Slamf9	chr1	+	174405490	174408540	1	225.972	916.472	769.088	372.1	775.388	849.63	1117.02
chr9	106175463	106175806	Poc1a	chr9	+	106183391	106252222	65085	62857.1	55260.5	49392.9	45873.7	95588	57469.5	56980.9
chr9	106169379	106169783	Poc1a	chr9	+	106183391	106252222	65085	62857.1	55260.5	49392.9	45873.7	95588	57469.5	56980.9
chr7	13599009	13599578	Zbtb45	chr7	-	13591014	13595149	124257	49873.2	39455.5	60094.6	40451.1	84261.7	51860.3	31293.7
chr4	41690881	41691433	Sigmar1	chr4	-	41685368	41688186	28609	60232.3	34072.5	73381.4	32204	67045.1	38073.4	23420.8
chr15	98508440	98508860	Rnd1	chr15	-	98499635	98507892	91746	103499	50303.1	89095.4	48202.9	100256	58943.6	34234.5
chr15	98522358	98522740	Rnd1	chr15	-	98499635	98507892	91746	103499	50303.1	89095.4	48202.9	100256	58943.6	34234.5
chr1	59446081	59446518	Fzd7	chr1	+	59538990	59543799	27774	14433.9	11464.4	20532.1	11340.9	23584.7	11548.9	9257.78
chr1	59555067	59555565	Fzd7	chr1	+	59538990	59543799	27774	14433.9	11464.4	20532.1	11340.9	23584.7	11548.9	9257.78
chr6	54946424	54946711	Ggct	chr6	-	54935088	54942861	9773	47314.5	21437.9	30431.3	17940.4	37296.8	23531.9	15140.3
chr5	125975768	125976605	Aacs	chr5	+	125956242	125997773	177891	168438	105730	129928	118604	245800	108725	78086.4
chr15	99293625	99293994	Nckap5l	chr15	-	99252464	99288179	35469	32367.5	25501.2	23347.3	15549.6	32166.7	24907.4	23763.2
chr18	81388567	81389238	Sall3	chr18	-	81163112	81183317	13217	14430.3	9538.55	7160.59	4905.83	10146.2	9334.49	9739.88
chr18	81515786	81516275	Sall3	chr18	-	81163112	81183317	13217	14430.3	9538.55	7160.59	4905.83	10146.2	9334.49	9739.88
chr4	43613670	43613933	Msmp	chr4	-	43596087	43597366	2886	3724.79	3294.6	5994.5	2334.45	4819.76	3550.08	1909.84
chr7	13875632	13876072	Lig1	chr7	+	13862661	13896776	14397	18037.4	21185.8	21072.6	21247.9	43841.3	24498.3	20395.5
chr7	13877990	13878534	Lig1	chr7	+	13862661	13896776	14397	18037.4	21185.8	21072.6	21247.9	43841.3	24498.3	20395.5
chr11	40546852	40547280	Hmmr	chr11	-	40514889	40546939	12369	3111.59	12875.5	4164.33	8537.87	17614.7	16884.8	14337.5
chr4	93217928	93218295	Tusc1	chr4	-	93000838	93002202	30803	24794.9	13207.9	27429.7	10323.9	21261.6	14459.5	6635.15
chr4	93510994	93511491	Tusc1	chr4	-	93000838	93002202	30803	24794.9	13207.9	27429.7	10323.9	21261.6	14459.5	6635.15
chr4	93406988	93407252	Tusc1	chr4	-	93000838	93002202	30803	24794.9	13207.9	27429.7	10323.9	21261.6	14459.5	6635.15
chr4	92540741	92541084	Tusc1	chr4	-	93000838	93002202	30803	24794.9	13207.9	27429.7	10323.9	21261.6	14459.5	6635.15
chr4	92823258	92823833	Tusc1	chr4	-	93000838	93002202	30803	24794.9	13207.9	27429.7	10323.9	21261.6	14459.5	6635.15
chr2	71387074	71387336	Dlx2	chr2	-	71381464	71384811	4842	3224.28	1772.7	2481.52	660.557	1360.18	2177.1	614.542
chr2	71421786	71422119	Dlx2	chr2	-	71381464	71384811	4842	3224.28	1772.7	2481.52	660.557	1360.18	2177.1	614.542
chr2	71455264	71455655	Dlx2	chr2	-	71381464	71384811	4842	3224.28	1772.7	2481.52	660.557	1360.18	2177.1	614.542
chr8	28095168	28095451	Zfp703	chr8	+	28087807	28091934	20536	20789.2	15531.1	21023.3	14928.7	30695.8	18644.1	7314.42
chr12	112519146	112519488	Amn	chr12	+	112509321	112514637	7081	9030.55	3103.25	3180.26	1794.65	3688.31	2613.34	1884.89
chr2	30067041	30067367	Ccbl1	chr2	-	30040650	30061219	76943	154062	76980.3	97067.4	81283.2	166880	99407	65526.4
chr2	30058206	30058788	Ccbl1	chr2	-	30040650	30061219	76943	154062	76980.3	97067.4	81283.2	166880	99407	65526.4
chr2	30055381	30055901	Ccbl1	chr2	-	30040650	30061219	76943	154062	76980.3	97067.4	81283.2	166880	99407	65526.4
chrX	98682244	98682529	Itgb1bp2	chrX	+	98644447	98648880	945	843.153	2082.14	1857.65	1985.46	4075.88	1519.51	2476.8
chrX	121482377	121482737	Vmn2r121	chrX	-	121240947	121249519	237	281.718	602.446	283.917	649.767	1333.86	510.178	818.778
chr8	94895151	94895540	Irx5	chr8	+	94881694	94885355	7553	2777.91	1702.32	1306.75	681.35	1397.19	1716.68	1800.45
chr14	32935100	32935625	Msmb	chr14	+	32955208	32971512	8025	3828.71	7180.47	3760.78	3202.46	6557.74	7051.49	8254.49
chr14	26529178	26529438	Ppifos	chr14	-	26515841	26520768	8575	11143.3	8060.82	8630.32	6558.15	13421.2	7752.06	7015.34
chr6	92219015	92219274	Trh	chr6	-	92192055	92194642	1181	1219.43	1627.09	996.866	849.529	1735.93	2012.8	1181.5
chr8	87635772	87635963	Zfp791	chr8	-	87633065	87646994	8261	11978.3	13186.7	14021.9	12742.1	25988	16632	11528.1
chr9	119073831	119074419	Acaa1b	chr9	-	119057160	119066211	351832	16926.9	33997.2	91809.2	36844.9	74878.6	27590.2	66899.1
chr9	119074591	119075041	Acaa1b	chr9	-	119057160	119066211	351832	16926.9	33997.2	91809.2	36844.9	74878.6	27590.2	66899.1
chr7	46533428	46533782	Gm16387	chr7	-	46511993	46519904	3069	873.813	2234.44	793.166	1063.24	2158.61	1770.85	2668.55
chr7	46458438	46458778	Gm16387	chr7	-	46511993	46519904	3069	873.813	2234.44	793.166	1063.24	2158.61	1770.85	2668.55
chr7	46586116	46586535	Gm16387	chr7	-	46511993	46519904	3069	873.813	2234.44	793.166	1063.24	2158.61	1770.85	2668.55
chr9	21991570	21991970	Zfp872	chr9	+	21992609	22006567	14633	2741.68	12100.8	5014.04	10070.4	20392.2	16132.2	14036.8
chr15	75104987	75105247	Ly6f	chr15	+	75098850	75102664	5781	832.004	1582.4	1269.91	1207.73	2443.57	1312.59	2364.9
chr15	75106932	75107294	Ly6f	chr15	+	75098850	75102664	5781	832.004	1582.4	1269.91	1207.73	2443.57	1312.59	2364.9
chr15	75150423	75151033	Ly6f	chr15	+	75098850	75102664	5781	832.004	1582.4	1269.91	1207.73	2443.57	1312.59	2364.9
chr15	75147609	75148112	Ly6f	chr15	+	75098850	75102664	5781	832.004	1582.4	1269.91	1207.73	2443.57	1312.59	2364.9
chr15	75139423	75139882	Ly6f	chr15	+	75098850	75102664	5781	832.004	1582.4	1269.91	1207.73	2443.57	1312.59	2364.9
chr15	75046534	75046850	Ly6f	chr15	+	75098850	75102664	5781	832.004	1582.4	1269.91	1207.73	2443.57	1312.59	2364.9
chr15	75076880	75077139	Ly6f	chr15	+	75098850	75102664	5781	832.004	1582.4	1269.91	1207.73	2443.57	1312.59	2364.9
chr15	75104298	75104637	Ly6f	chr15	+	75098850	75102664	5781	832.004	1582.4	1269.91	1207.73	2443.57	1312.59	2364.9
chr19	27125263	27125537	Gm815	chr19	+	26960414	26963137	1	401.57	622.892	453.667	691.614	1397.19	363.203	812.955
chr19	27013173	27013486	Gm815	chr19	+	26960414	26963137	1	401.57	622.892	453.667	691.614	1397.19	363.203	812.955
chr2	118429705	118430145	Bub1b	chr2	+	118423946	118467328	9441	11157.6	21987.7	11261.1	14576.3	29414	25629.6	24354.7
chr11	116056473	116056998	Acox1	chr11	-	116033201	116060359	607991	3.0648e+06	556413	550237	308661	621254	419466	282207
chr8	73172036	73172629	Pgpep1	chr8	-	73173009	73183580	102215	67483.5	43567.2	54954.2	34062.2	68553.8	44910.9	42708.1
chr17	14310544	14310858	Dact2	chr17	-	14332236	14340838	93653	38429.1	54506.5	97642.6	51374.6	103376	63448.2	45824.9
chr1	90183914	90185121	Hjurp	chr1	-	90155430	90174154	238396	113774	157379	234358	155270	312207	190067	149603
chr1	90156520	90157508	Hjurp	chr1	-	90155430	90174154	238396	113774	157379	234358	155270	312207	190067	149603
chr15	75506101	75506542	Top1mt	chr15	-	75487462	75509220	37806	59887.4	37188.4	64760.7	26642	53479.6	39476.8	24111.3
chr13	69726996	69727699	Srd5a1	chr13	-	69712326	69750341	74077	24223.1	38313.7	55457.5	63638.6	127721	36895.5	52377.9
chr13	69715781	69716646	Srd5a1	chr13	-	69712326	69750341	74077	24223.1	38313.7	55457.5	63638.6	127721	36895.5	52377.9
chr7	148517884	148518295	Tmem80	chr7	+	148514028	148523054	13558	9008.65	11541.3	14717.5	8713.69	17485	11219.9	12100.5
chr19	5827337	5827984	Neat1	chr19	-	5842301	5845478	724252	2.08565e+06	758156	827652	573933	1.15137e+06	912000	372968
chr3	97435335	97435721	Fmo5	chr3	+	97432726	97459210	205371	204922	124015	169574	181676	364382	181699	140636
chr3	97432556	97432994	Fmo5	chr3	+	97432726	97459210	205371	204922	124015	169574	181676	364382	181699	140636
chr9	89105605	89106423	Mthfs	chr9	+	89106027	89135063	473	281.718	2544.01	1245.83	1114.3	2234.9	1104.22	3654.8
chr9	89114183	89115022	Mthfs	chr9	+	89106027	89135063	473	281.718	2544.01	1245.83	1114.3	2234.9	1104.22	3654.8
chr9	89177507	89177976	Mthfs	chr9	+	89106027	89135063	473	281.718	2544.01	1245.83	1114.3	2234.9	1104.22	3654.8
chr9	89113007	89113524	Mthfs	chr9	+	89106027	89135063	473	281.718	2544.01	1245.83	1114.3	2234.9	1104.22	3654.8
chr17	24843800	24844297	Tbl3	chr17	-	24837597	24844598	18682	25889.5	15146.5	20726.4	14472.3	29002.4	14644.4	10293.5
chr4	145317111	145317515	Gm13242	chr4	+	145260599	145294340	473	281.718	410.833	283.917	372.1	745.633	425.315	711.461
chr4	145283749	145284223	Gm13242	chr4	+	145260599	145294340	473	281.718	410.833	283.917	372.1	745.633	425.315	711.461
chr17	35967081	35967516	Flot1	chr17	+	35960301	35969732	18077	36521.4	23153.2	20522.2	10229.1	20475	21619.4	14935.2
chr3	91163831	91164260	9130204L05Rik	chr3	-	90892058	90894727	1417	1	314.895	1	186.55	373.317	425.315	406.977
chr4	60085463	60085767	Mup7	chr4	-	60079340	60083347	2822	94.5725	821.845	1	928.749	1857.62	764.767	1726.4
chr4	60083654	60084569	Mup7	chr4	-	60079340	60083347	2822	94.5725	821.845	1	928.749	1857.62	764.767	1726.4
chr5	24616163	24616560	2900005J15Rik	chr5	+	24606792	24608825	10467	3399.87	3029.99	2107.34	2468.95	4934.2	2938.34	2442.27
chr11	69794773	69795247	Rai12	chr11	-	69781726	69794737	57113	86710.5	45632.5	65853.4	34349.8	68582.4	42602.2	30236.3
chr9	61796287	61796587	Kif23	chr9	-	61765084	61794606	12037	8214.68	14736.5	7056.58	9090.05	18138.1	17080.5	17511.7
chr2	29943622	29943964	Pkn3	chr2	+	29934285	29946539	12899	13667	12629.1	15695.3	8543.66	17039.4	12727.2	8704.14
chr9	110721976	110722364	Prss44	chr9	+	110716497	110720503	3541	992.471	1608.61	1331.55	940.067	1874.03	905.965	2132.38
chr1	64803745	64804219	Fzd5	chr1	-	64777131	64784324	46507	78425.1	26145.4	44093.4	16058.8	32005.4	33050.6	14332.1
chr1	64802520	64803022	Fzd5	chr1	-	64777131	64784324	46507	78425.1	26145.4	44093.4	16058.8	32005.4	33050.6	14332.1
chr3	107834994	107835669	Gstm4	chr3	-	107843325	107847777	14359	13371.9	10341.4	23775.1	11794.9	23506.9	10054.6	8065.23
chr4	135717740	135718169	E2f2	chr4	+	135728308	135751971	42814	27529.6	28833.3	34702	29199.2	58093.1	36083.3	26283.5
chr4	135752663	135753018	E2f2	chr4	+	135728308	135751971	42814	27529.6	28833.3	34702	29199.2	58093.1	36083.3	26283.5
chr8	95856237	95857240	Ces1g	chr8	-	95826267	95861108	46860	5441.75	23469.2	27915.4	23431.3	46592.9	22521.1	38793.5
chr8	95954754	95955143	Ces1g	chr8	-	95826267	95861108	46860	5441.75	23469.2	27915.4	23431.3	46592.9	22521.1	38793.5
chr8	95855118	95855451	Ces1g	chr8	-	95826267	95861108	46860	5441.75	23469.2	27915.4	23431.3	46592.9	22521.1	38793.5
chr8	95923481	95924072	Ces1g	chr8	-	95826267	95861108	46860	5441.75	23469.2	27915.4	23431.3	46592.9	22521.1	38793.5
chrX	166527051	166527618	4933407K13Rik	chrX	-	72970796	73010038	5793	7288.91	7266.84	7032.02	4984.53	9897.15	5740.27	7098.53
chr11	60053988	60054456	Srebf1	chr11	-	60012590	60034106	283139	143859	134859	201999	162217	321719	183533	128840
chr11	113570137	113570521	Cpsf4l	chr11	-	113559484	113571331	30681	21303.7	17019.7	19808.8	11228.5	22256.1	15054.3	15654.4
chr11	113583747	113584158	Cpsf4l	chr11	-	113559484	113571331	30681	21303.7	17019.7	19808.8	11228.5	22256.1	15054.3	15654.4
chr6	11747328	11747662	Ndufa4	chr6	-	11850372	11857446	24353	58710.4	30752.2	38831.8	28428	56235.3	30092.7	23828.9
chr7	87697775	87698129	Blm	chr7	-	87599878	87680005	317129	47207.7	85247.5	32226.8	58243.4	115137	80695.6	143479
chr7	71080008	71080436	Klf13	chr7	-	71031236	71083801	406289	1.14512e+06	556705	530962	218567	431545	277117	211099
chr7	71073986	71074370	Klf13	chr7	-	71031236	71083801	406289	1.14512e+06	556705	530962	218567	431545	277117	211099
chr19	5957255	5957810	Pola2	chr19	-	5940542	5964206	58033	32860.1	33472.9	37491.7	33906.9	66821.6	39867.5	29041.3
chr10	79169997	79170298	Bsg	chr10	+	79167102	79174724	29839	45326.3	37373.4	90418	31540	62149.7	40097.5	18773.3
chr4	135426153	135426580	Pnrc2	chr4	-	135426840	135429761	29077	42299.4	24268.5	43951.1	20086.7	39579.5	28656.2	18152.3
chr17	45745271	45745829	Gm7325	chr17	-	45737915	45739051	161	1244.52	760.376	1057.54	517.645	1016.86	331.424	604.559
chr12	88047459	88047754	Angel1	chr12	-	88041451	88067410	18440	18193.5	15640.4	15669.5	10003.6	19613.6	15886.3	15167.8
chr10	23411066	23411456	Rps12	chr10	-	23504988	23507015	45225	97071.2	38620.9	52725.8	26318	51567.6	37446.9	22838.1
chr10	23473916	23474387	Rps12	chr10	-	23504988	23507015	45225	97071.2	38620.9	52725.8	26318	51567.6	37446.9	22838.1
chr10	23496775	23497052	Rps12	chr10	-	23504988	23507015	45225	97071.2	38620.9	52725.8	26318	51567.6	37446.9	22838.1
chrX	151818179	151818447	Prdx4	chrX	-	151758462	151772997	4503	11142.1	11238.6	16852.5	9576.43	18750	12223.1	6022.44
chr5	109137462	109137755	Fgfrl1	chr5	+	109123247	109135969	65177	17821.6	20927.4	30382.6	14382.6	28159.4	22332.6	18806.2
chr3	127276247	127276684	4930422G04Rik	chr3	+	127256406	127320941	5429	6120.64	22388.7	9054.33	21307.1	41644	26834.3	25429.1
chr11	68688244	68688717	Rnf222	chr11	+	68702054	68708517	8261	6375.08	5548.22	6475.58	3576.19	6981.94	4283.88	3850.3
chr7	25427859	25428187	Lypd3	chr7	+	25421588	25426137	473	4617.51	2824.61	1658.05	1599.36	3121.82	2708.67	1986.8
chr15	74788236	74788727	Ly6e	chr15	+	74785480	74790335	32095	25354.8	29465.2	57061.8	26998.1	52613.2	39892.4	20794.9
chr12	106265883	106266251	Snhg10	chr12	-	106268826	106270489	5189	22983.6	9410.9	14159.3	7400.36	14361.5	8443.97	5473.79
chr5	120918221	120918622	Sdsl	chr5	-	120908210	120922772	29029	120210	50307.6	40265.9	23590.8	45769.3	44994.7	31904.8
chr13	23517467	23517885	Abt1	chr13	-	23510229	23515735	3377	15723.6	8499.49	12573.3	8317.85	16126.6	8034.82	7281.97
chr13	23488814	23489095	Abt1	chr13	-	23510229	23515735	3377	15723.6	8499.49	12573.3	8317.85	16126.6	8034.82	7281.97
chr13	23492550	23492970	Abt1	chr13	-	23510229	23515735	3377	15723.6	8499.49	12573.3	8317.85	16126.6	8034.82	7281.97
chr13	23504711	23505253	Abt1	chr13	-	23510229	23515735	3377	15723.6	8499.49	12573.3	8317.85	16126.6	8034.82	7281.97
chr18	38423886	38424237	1700086O06Rik	chr18	-	38398058	38410219	77373	121274	70633.5	125548	58441.8	113239	66957.2	47523.2
chr16	43014178	43014602	BC002163	chr4	-	123389952	123395404	15607	33096.2	12293.4	18372.8	9547.74	18471.5	9402.38	9826.82
chr16	43046678	43047142	BC002163	chr4	-	123389952	123395404	15607	33096.2	12293.4	18372.8	9547.74	18471.5	9402.38	9826.82
chr16	43080512	43081109	BC002163	chr4	-	123389952	123395404	15607	33096.2	12293.4	18372.8	9547.74	18471.5	9402.38	9826.82
chr16	42934491	42934942	BC002163	chr4	-	123389952	123395404	15607	33096.2	12293.4	18372.8	9547.74	18471.5	9402.38	9826.82
chr10	76705573	76705955	Gm10941	chr10	-	76720517	76721968	8043	21437.9	9956.25	16787.7	7385.89	14288.7	10809.3	5010
chr10	76714009	76714355	Gm10941	chr10	-	76720517	76721968	8043	21437.9	9956.25	16787.7	7385.89	14288.7	10809.3	5010
chr19	4820565	4821179	Rbm14	chr19	-	4800924	4811634	57304	96104.8	53055.2	82634.5	46564	89973.5	59125.6	38525.6
chr4	147525135	147525655	Fbxo6	chr4	-	147519824	147526244	29822	59882.6	33972.7	86027.9	27816.6	53716.5	37834	16756.7
chr19	45130208	45130576	Sfxn3	chr19	+	45122065	45130873	11265	8178.05	7285.19	5688.71	3483.28	6726.35	6092	7311.09
chr17	83547683	83548063	Pkdcc	chr17	+	83614622	83624409	38271	30662.5	27719.5	33054.3	23417.1	45124.2	37412.6	17038.3
chr17	83612783	83613120	Pkdcc	chr17	+	83614622	83624409	38271	30662.5	27719.5	33054.3	23417.1	45124.2	37412.6	17038.3
chr2	155652131	155652902	Eif6	chr2	-	155645572	155652661	19541	68038.6	33763.9	43563.9	20943.7	40324.9	30749.9	21798.6
chr1	135961839	135962441	Btg2	chr1	-	135971441	135975732	87058	196854	76987.4	88110.1	46896.4	90152.8	86984.9	45663.1
chr1	135988920	135989322	Btg2	chr1	-	135971441	135975732	87058	196854	76987.4	88110.1	46896.4	90152.8	86984.9	45663.1
chr8	125848366	125848872	Fanca	chr8	-	125792143	125842476	87182	51453.2	59494.1	70122.7	53507	102716	60528.9	58603.6
chr1	74768081	74768866	Cyp27a1	chr1	+	74760147	74784464	67574	46536.4	48993	85285.5	57198.5	109797	66256.3	52912.4
chr6	49202163	49202553	Tra2a	chr6	-	49193919	49214051	26978	92862	39265.1	49129.3	29753.5	57092.5	44241.7	33803.6
chr3	94587264	94587660	Cgn	chr3	-	94563991	94590437	41865	18041.8	26647.6	56225.3	24977.6	47915.8	31886.4	16339.1
chr4	62847412	62847853	Kif12	chr4	-	62826670	62833165	9441	8479.87	5466.83	5324.17	3273.78	6268.59	5768.8	5797.83
chr7	4196281	4196772	Lilra5	chr7	+	4189355	4195065	237	1311.02	3885.69	2323.56	2820.83	5401.12	2063.71	5584.85
chr7	4190674	4191231	Lilra5	chr7	+	4189355	4195065	237	1311.02	3885.69	2323.56	2820.83	5401.12	2063.71	5584.85
chr7	90995944	90996395	Mesdc1	chr7	-	91029004	91032851	41728	61553.8	26962.7	59729.1	23985.6	45820.8	31078.6	14574.6
chr9	98322246	98322637	Rbp1	chr9	+	98323379	98346969	28557	15632	27984.2	25445.4	17044.7	32535.6	29950.1	31389
chr9	98322929	98323375	Rbp1	chr9	+	98323379	98346969	28557	15632	27984.2	25445.4	17044.7	32535.6	29950.1	31389
chrX	33785717	33785984	Zcchc12	chrX	+	33735898	33739153	945	656.008	483.703	324.849	244.452	466.396	595.041	377.028
chrX	33765869	33766294	Zcchc12	chrX	+	33735898	33739153	945	656.008	483.703	324.849	244.452	466.396	595.041	377.028
chr9	65044147	65044572	Parp16	chr9	+	65062496	65087026	107212	65341.3	64086.3	124316	59434.9	113337	69155.7	71768.7
chr9	65049216	65049731	Parp16	chr9	+	65062496	65087026	107212	65341.3	64086.3	124316	59434.9	113337	69155.7	71768.7
chr9	65081071	65081756	Parp16	chr9	+	65062496	65087026	107212	65341.3	64086.3	124316	59434.9	113337	69155.7	71768.7
chr18	70697826	70698061	Poli	chr18	-	70668333	70689975	16601	40509.2	18925.6	19892.3	17488.5	33345.5	25091.6	12030.6
chr17	35112638	35113222	Hspa1l	chr17	+	35109647	35116173	11801	3743.9	6969.07	8537.38	4795.82	9135.73	7067.74	5897.24
chr19	30316047	30316398	Mbl2	chr19	+	30307446	30314172	17701	4398.91	16290	8856.89	9239.81	17557.1	19454.5	20156.4
chr19	30307214	30307624	Mbl2	chr19	+	30307446	30314172	17701	4398.91	16290	8856.89	9239.81	17557.1	19454.5	20156.4
chr19	30452110	30452371	Mbl2	chr19	+	30307446	30314172	17701	4398.91	16290	8856.89	9239.81	17557.1	19454.5	20156.4
chr19	30297221	30297637	Mbl2	chr19	+	30307446	30314172	17701	4398.91	16290	8856.89	9239.81	17557.1	19454.5	20156.4
chr19	30362213	30362751	Mbl2	chr19	+	30307446	30314172	17701	4398.91	16290	8856.89	9239.81	17557.1	19454.5	20156.4
chr6	125032697	125033177	Lpar5	chr6	+	125017937	125032490	4249	8435.67	7931.99	11662.9	7299.3	13856.4	7210.02	8813.95
chr5	140298004	140298624	Psmg3	chr5	-	140299547	140302797	28125	23004.7	12988.5	16689.2	13752.7	26082.6	13724.3	12550.1
chr5	140341386	140341655	Psmg3	chr5	-	140299547	140302797	28125	23004.7	12988.5	16689.2	13752.7	26082.6	13724.3	12550.1
chr2	158166923	158167501	9430008C03Rik	chr2	-	158179435	158187258	17124	36943.4	29689.7	50069.5	24458.6	46376.2	25385.5	19603.6
chr6	83728944	83729364	Tex261	chr6	-	83720407	83725806	20414	39438.8	19334.6	28397.9	13299.8	25214	18471.2	13602.5
chr16	18860305	18860620	Mrpl40	chr16	-	18872110	18876730	20477	17884.9	10242.6	16161	9967.27	18878.9	11520.3	5862.72
chr1	137112200	137112463	Elf3	chr1	-	137150150	137155049	25305	35844.1	24533.9	40102.9	23980.1	45382.1	33280.7	12991.4
chrX	99398922	99399212	Rps4x	chrX	-	99380281	99383710	1417	1936.16	4005.35	4038.16	3137.19	5936.71	3305.96	2998.83
chr1	51624008	51624301	Obfc2a	chr1	-	51526331	51535243	97776	197706	64643	84545.9	43828.4	82925.4	67582.7	44621.5
chr1	3754686	3755162	Obfc2a	chr1	-	51526331	51535243	97776	197706	64643	84545.9	43828.4	82925.4	67582.7	44621.5
chr15	81691045	81691582	Tob2	chr15	-	81678699	81688756	188475	235390	125992	202007	89567.1	169449	121052	86895.1
chr15	81670207	81670776	Tob2	chr15	-	81678699	81688756	188475	235390	125992	202007	89567.1	169449	121052	86895.1
chr4	138893903	138894413	Mrto4	chr4	-	138903359	138908213	8523	7486.01	6271.82	5938.4	4851.88	9178.45	6503.31	4423.91
chr4	138890592	138891246	Mrto4	chr4	-	138903359	138908213	8523	7486.01	6271.82	5938.4	4851.88	9178.45	6503.31	4423.91
chr9	108982173	108982504	Ccdc72	chr9	-	108980501	108984895	8259	18409.3	10386.1	10885.5	7249.29	13705.4	12009.7	6796.55
chr12	71297260	71297645	Pygl	chr12	-	71291801	71328670	126907	80590.5	109674	140233	91509.2	172959	104813	112223
chr12	71324279	71324732	Pygl	chr12	-	71291801	71328670	126907	80590.5	109674	140233	91509.2	172959	104813	112223
chr4	62999478	63000067	Orm1	chr4	+	63005599	63009196	13453	431960	171061	123180	40861.2	77222	87775	31718.4
chr1	78507545	78507893	Mogat1	chr1	+	78507634	78534748	27849	18647.4	23802.2	32550.6	20268.3	38256.5	24879.6	24083.9
chr1	78535033	78535357	Mogat1	chr1	+	78507634	78534748	27849	18647.4	23802.2	32550.6	20268.3	38256.5	24879.6	24083.9
chrX	10292688	10293110	Mid1ip1	chrX	+	10294490	10296828	43317	8803.99	13264.8	13482.8	9986.22	18848.4	13500	11409.5
chr11	48631919	48632398	Trim41	chr11	-	48619905	48630893	60951	123085	68077.6	98675.3	47642.8	89902.5	63697.8	32056.2
chr19	61339505	61340476	Csf2ra	chr19	-	61300304	61304321	8333	25935.7	11067.1	13505.9	6832.39	12889.4	11222.1	6692.97
chr5	65830305	65830571	Ugdh	chr5	-	65804460	65827081	107796	141792	79448.6	110996	62653.7	118179	111324	71828.2
chr5	65815490	65816035	Ugdh	chr5	-	65804460	65827081	107796	141792	79448.6	110996	62653.7	118179	111324	71828.2
chr5	65816610	65816858	Ugdh	chr5	-	65804460	65827081	107796	141792	79448.6	110996	62653.7	118179	111324	71828.2
chr5	65811994	65812418	Ugdh	chr5	-	65804460	65827081	107796	141792	79448.6	110996	62653.7	118179	111324	71828.2
chr1	167546792	167547598	Mpzl1	chr1	-	167522311	167564672	21701	39754.6	31694.8	56306.5	22820.7	43040.2	29232.2	31295.4
chr1	167571545	167572084	Mpzl1	chr1	-	167522311	167564672	21701	39754.6	31694.8	56306.5	22820.7	43040.2	29232.2	31295.4
chr17	26643979	26644585	Dusp1	chr17	-	26642535	26645417	190422	446547	101527	147242	81024.5	152689	99231.2	65120.4
chr13	97424959	97425262	Hmgcr	chr13	-	97418918	97440891	95591	110567	84986	135323	80264.6	150989	97339.3	81305.5
chr13	97512881	97513470	Hmgcr	chr13	-	97418918	97440891	95591	110567	84986	135323	80264.6	150989	97339.3	81305.5
chr13	97446775	97447081	Hmgcr	chr13	-	97418918	97440891	95591	110567	84986	135323	80264.6	150989	97339.3	81305.5
chr13	97519800	97520144	Hmgcr	chr13	-	97418918	97440891	95591	110567	84986	135323	80264.6	150989	97339.3	81305.5
chr8	4775828	4776088	Shcbp1	chr8	-	4735979	4779534	5545	3068.98	8203.94	3559.97	7539.33	14175	9358.32	9895.87
chr2	121347793	121348789	Wdr76	chr2	+	121332458	121370595	11093	10013.3	14033.2	10110.6	12526.3	23529.4	12356.3	18124.8
chr12	8459622	8460060	Rhob	chr12	-	8504564	8506791	92526	185017	57907.8	75569.6	31474.5	59097.1	64240.2	29082
chr15	37019668	37020129	Zfp706	chr15	-	36926781	36937157	28997	55631.7	19646.7	32496.4	14512.6	27230.5	18151.2	11991.1
chr15	36972844	36973222	Zfp706	chr15	-	36926781	36937157	28997	55631.7	19646.7	32496.4	14512.6	27230.5	18151.2	11991.1
chr15	36970749	36971093	Zfp706	chr15	-	36926781	36937157	28997	55631.7	19646.7	32496.4	14512.6	27230.5	18151.2	11991.1
chr1	133023204	133023609	Dyrk3	chr1	-	133025017	133034811	15251	6772.07	7580.35	8730.24	4442.88	8335.78	9158.26	7168.83
chr18	12800817	12801214	Ttc39c	chr18	+	12802041	12895561	1066403	591036	816874	754703	868226	1.62876e+06	1.02962e+06	1.11441e+06
chr18	12778428	12778781	Ttc39c	chr18	+	12802041	12895561	1066403	591036	816874	754703	868226	1.62876e+06	1.02962e+06	1.11441e+06
chr18	12806330	12806775	Ttc39c	chr18	+	12802041	12895561	1066403	591036	816874	754703	868226	1.62876e+06	1.02962e+06	1.11441e+06
chr18	12880696	12881070	Ttc39c	chr18	+	12802041	12895561	1066403	591036	816874	754703	868226	1.62876e+06	1.02962e+06	1.11441e+06
chr7	69512731	69513153	Magel2	chr7	+	69521864	69526526	5429	6128.21	2145.18	1772.42	1687.53	3165.69	2196.24	2388.2
chr15	97288417	97288700	Amigo2	chr15	-	97074504	97077718	17869	22757	8002.5	14362.8	5368	10066.9	8434.58	4768.74
chr7	31842189	31842504	Fxyd1	chr7	-	31836696	31840675	83699	27329.4	37925	53230.2	31307.6	58679.8	47227.1	27602.9
chr4	132379460	132379808	Ppp1r8	chr4	-	132382839	132399084	24443	42200.2	29927.7	33507.7	23415	43852.4	36229.9	23137.1
chr13	21584598	21584915	Zfp389	chr13	-	21596184	21598393	9073	4045.72	4484.78	6858.66	4257.33	7968.43	3866.06	3535
chr19	45320726	45320987	Lbx1	chr19	-	45308217	45309726	755	965.793	693.534	528.308	150.229	280.238	924.021	427.359
chr15	9044318	9044828	Skp2	chr15	-	9041741	9070207	35706	17790.5	33442.5	33506.5	30983.1	57766.9	36742.4	38706.1
chr15	9049639	9050109	Skp2	chr15	-	9041741	9070207	35706	17790.5	33442.5	33506.5	30983.1	57766.9	36742.4	38706.1
chr8	12719184	12719500	Gm15348	chr8	-	12706943	12719127	4255	16828.1	20779.8	37940	16917.1	31538.8	39238.8	9428.74
chr8	12715822	12716147	Gm15348	chr8	-	12706943	12719127	4255	16828.1	20779.8	37940	16917.1	31538.8	39238.8	9428.74
chr8	12720736	12721349	Gm15348	chr8	-	12706943	12719127	4255	16828.1	20779.8	37940	16917.1	31538.8	39238.8	9428.74
chr19	4235333	4235737	Pold4	chr19	+	4231898	4233634	9421	11203	6595.67	6339.05	4168.37	7768.53	3659.86	2998.41
chr5	139454721	139455152	Pdgfa	chr5	-	139452928	139470907	40760	34818.3	29470.1	34189.6	20718.6	38588	33757.7	19881.4
chr5	139420626	139421105	Pdgfa	chr5	-	139452928	139470907	40760	34818.3	29470.1	34189.6	20718.6	38588	33757.7	19881.4
chr8	13380159	13380551	Atp4b	chr8	-	13386208	13396778	6137	10407.5	5664.61	6019.3	3277.73	6102.65	5982.94	4131.49
chr5	137396632	137397007	4933404O12Rik	chr5	+	137395015	137412979	12745	11850.1	11458.4	11181.6	9216.64	17127.6	10956.3	12979.8
chr5	137408712	137409154	4933404O12Rik	chr5	+	137395015	137412979	12745	11850.1	11458.4	11181.6	9216.64	17127.6	10956.3	12979.8
chr5	117830279	117830608	Rfc5	chr5	-	117829153	117839032	29935	27035.1	29415.9	45795.7	25217.1	46780.5	31527.4	21225
chr16	32087768	32088226	Pigx	chr16	-	32084501	32099813	27200	27238.2	20083.4	26421.6	12068.1	22376.2	20919.9	15580.8
chr3	57423617	57424003	Commd2	chr3	-	57448270	57455606	8223	15557.5	11777.8	14244.1	11297.7	20929.3	12753.2	8732.43
chr3	57452920	57453178	Commd2	chr3	-	57448270	57455606	8223	15557.5	11777.8	14244.1	11297.7	20929.3	12753.2	8732.43
chr12	69873194	69873574	Rps29	chr12	-	70258708	70260173	30447	61324.5	31872.1	38060.1	24022.5	44482.9	31977.4	18875.2
chr12	69646433	69646593	Rps29	chr12	-	70258708	70260173	30447	61324.5	31872.1	38060.1	24022.5	44482.9	31977.4	18875.2
chr12	70260096	70260694	Rps29	chr12	-	70258708	70260173	30447	61324.5	31872.1	38060.1	24022.5	44482.9	31977.4	18875.2
chr12	70234751	70235161	Rps29	chr12	-	70258708	70260173	30447	61324.5	31872.1	38060.1	24022.5	44482.9	31977.4	18875.2
chr2	128000006	128000785	Bcl2l11	chr2	+	127951773	127988283	48469	60233.8	44381.5	67177.4	30445.9	56358.5	42372.9	41519.7
chr2	128012906	128013371	Bcl2l11	chr2	+	127951773	127988283	48469	60233.8	44381.5	67177.4	30445.9	56358.5	42372.9	41519.7
chr2	127997682	127998556	Bcl2l11	chr2	+	127951773	127988283	48469	60233.8	44381.5	67177.4	30445.9	56358.5	42372.9	41519.7
chr3	107817083	107817547	Gstm1	chr3	-	107815167	107820891	77324	24480.8	28135.1	75254.2	44214	81796.2	34273	32386.9
chr3	107816098	107816648	Gstm1	chr3	-	107815167	107820891	77324	24480.8	28135.1	75254.2	44214	81796.2	34273	32386.9
chr8	96951624	96952358	9330175E14Rik	chr8	-	96957026	96959003	14869	24910.8	14172.1	14806.6	9947.26	18400.9	19360.6	11124.2
chr7	14082456	14082852	Bsph1	chr7	+	14036189	14058798	5429	1685.31	4021.34	2207.75	1560.41	2886.45	3648.67	5177.21
chr7	14018310	14018705	Bsph1	chr7	+	14036189	14058798	5429	1685.31	4021.34	2207.75	1560.41	2886.45	3648.67	5177.21
chr5	125889490	125890072	Ubc	chr5	-	125866334	125870387	319529	366896	164284	242840	162663	299747	218203	93731.5
chr5	125866422	125868453	Ubc	chr5	-	125866334	125870387	319529	366896	164284	242840	162663	299747	218203	93731.5
chr5	125885804	125886745	Ubc	chr5	-	125866334	125870387	319529	366896	164284	242840	162663	299747	218203	93731.5
chr9	107576846	107577462	Gnat1	chr9	-	107576804	107581923	142582	297740	165508	137343	89607.1	164999	150984	113452
chr4	121805156	121805579	Gm12887	chr4	-	121286608	121294730	2125	375.29	1362.35	227.333	509.222	937.132	1358.81	2148.6
chr4	121815303	121815712	Gm12887	chr4	-	121286608	121294730	2125	375.29	1362.35	227.333	509.222	937.132	1358.81	2148.6
chr4	121794008	121794427	Gm12887	chr4	-	121286608	121294730	2125	375.29	1362.35	227.333	509.222	937.132	1358.81	2148.6
chr19	6982688	6983177	Prdx5	chr19	-	6981308	6984135	37727	59090.3	30528.9	56115	22955.2	42207.5	23226.4	17140.2
chr7	108459069	108459702	Atg16l2	chr7	-	108438129	108450602	45126	62566.4	47459.5	51490.6	31941.6	58721.8	41203.3	29129
chr17	36171975	36172500	H2-T23	chr17	-	36166921	36169646	6422	2777.52	3529.73	5245.19	4151.26	7620.9	4049.87	3331.6
chr17	36169476	36169885	H2-T23	chr17	-	36166921	36169646	6422	2777.52	3529.73	5245.19	4151.26	7620.9	4049.87	3331.6
chr14	110828926	110829253	Slitrk6	chr14	-	111147799	111154371	1	375.29	1591.05	623.416	805.05	1477.68	1908.07	1872.41
chr14	111434355	111434756	Slitrk6	chr14	-	111147799	111154371	1	375.29	1591.05	623.416	805.05	1477.68	1908.07	1872.41
chr14	110560908	110561261	Slitrk6	chr14	-	111147799	111154371	1	375.29	1591.05	623.416	805.05	1477.68	1908.07	1872.41
chr14	110443134	110443285	Slitrk6	chr14	-	111147799	111154371	1	375.29	1591.05	623.416	805.05	1477.68	1908.07	1872.41
chr8	48737627	48737920	Ing2	chr8	-	48752531	48760513	39226	42455.1	21629.6	37397.8	17571.4	32230.8	28005.4	14281.8
chr12	25795555	25795981	Id2	chr12	-	25778663	25780957	149147	202262	110256	112830	66306.3	121468	103206	64835.5
chr12	25786424	25786833	Id2	chr12	-	25778663	25780957	149147	202262	110256	112830	66306.3	121468	103206	64835.5
chr12	25784813	25785433	Id2	chr12	-	25778663	25780957	149147	202262	110256	112830	66306.3	121468	103206	64835.5
chr7	107216841	107217310	Pold3	chr7	-	107230622	107270010	24798	15738.7	28051.5	21894.6	22642.8	41477.7	28352.8	30702.2
chr4	118217436	118217752	Tmem125	chr4	-	118213545	118216331	11586	21934.8	12285.1	14897.6	9626.7	17630	11310.5	5763.72
chr4	118219555	118221428	Tmem125	chr4	-	118213545	118216331	11586	21934.8	12285.1	14897.6	9626.7	17630	11310.5	5763.72
chr2	30319414	30319964	Ier5l	chr2	-	30328160	30329719	10089	29931.9	9282.72	12552.6	7078.21	12950.8	10315.7	4301.2
chr5	143676909	143677528	Actb	chr5	-	143664794	143668403	202166	341921	127857	195963	100502	183870	145851	56604.1
chr12	105204913	105205329	Serpina1e	chr12	-	105185141	105195107	15038	94943.7	56882.9	47584.7	45477.8	82879.6	64709.6	17055.8
chr12	105199880	105200344	Serpina1e	chr12	-	105185141	105195107	15038	94943.7	56882.9	47584.7	45477.8	82879.6	64709.6	17055.8
chr12	105194869	105195758	Serpina1e	chr12	-	105185141	105195107	15038	94943.7	56882.9	47584.7	45477.8	82879.6	64709.6	17055.8
chr1	193617596	193618284	Nek2	chr1	+	193645351	193656928	12358	8508.93	8574.32	5705.08	9201.12	16767.5	10713.6	8076.04
chr1	183673024	183673939	Lbr	chr1	-	183745445	183772532	42802	51979.2	34346.2	53180.4	30137.5	54910.9	43978.5	22438.7
chr19	39012112	39012472	Hells	chr19	+	39005479	39042767	8261	2560.91	8429.89	3735.5	9587.74	17466.3	10165.4	9734.06
chr7	3354842	3355102	Cacng7	chr7	+	3336684	3366537	18645	6872.41	10871.9	8665.95	6031.24	10984.3	10921.2	12586.3
chr7	3363552	3363973	Cacng7	chr7	+	3336684	3366537	18645	6872.41	10871.9	8665.95	6031.24	10984.3	10921.2	12586.3
chr7	3340300	3340571	Cacng7	chr7	+	3336684	3366537	18645	6872.41	10871.9	8665.95	6031.24	10984.3	10921.2	12586.3
chr3	87889359	87889552	Iqgap3	chr3	+	87885972	87924970	33513	31398.4	29030.3	21591.3	28030.6	51036.6	31071.7	27077.5
chr3	87884427	87884687	Iqgap3	chr3	+	87885972	87924970	33513	31398.4	29030.3	21591.3	28030.6	51036.6	31071.7	27077.5
chr3	87918735	87919226	Iqgap3	chr3	+	87885972	87924970	33513	31398.4	29030.3	21591.3	28030.6	51036.6	31071.7	27077.5
chr5	5533601	5534286	Cldn12	chr5	-	5505014	5514976	41118	42725	28882.6	40257	22546.8	40995.5	33356.9	17060
chr19	5849885	5850247	Frmd8	chr19	-	5850973	5875208	74120	71646.5	61489.5	85850.6	46021.3	83630.4	58430.1	43520.9
chr5	4696996	4697257	Fzd1	chr5	-	4753838	4758216	27589	29614.9	20073.2	34106.5	16235.2	29477	23702.3	13563.4
chr5	4736933	4737348	Fzd1	chr5	-	4753838	4758216	27589	29614.9	20073.2	34106.5	16235.2	29477	23702.3	13563.4
chr5	4777843	4778176	Fzd1	chr5	-	4753838	4758216	27589	29614.9	20073.2	34106.5	16235.2	29477	23702.3	13563.4
chr5	114185130	114185647	Ficd	chr5	+	114185790	114190616	20061	25127.8	17495.6	30028.2	10639.2	19302.3	14323.7	7801.09
chr6	115535520	115535787	2510049J12Rik	chr6	-	115533564	115542594	10410	9469.35	9886.26	8643.8	7458.53	13531.1	9034.4	9623
chr9	4300577	4300976	Aasdhppt	chr9	-	4294792	4309494	16775	43676.3	22059.3	31317.1	17262.9	31300.4	24275.8	13792.2
chr3	30500095	30500574	Mynn	chr3	+	30501008	30517416	47309	53872.9	33226.9	41278.9	27410.3	49689.3	36383.4	24700.7
chrX	147574190	147574733	Tsr2	chrX	-	147521636	147531086	3181	11994.2	6754.26	6462.33	6977.94	12642.6	6095.61	6175.93
chr9	61688801	61689220	Rplp1	chr9	-	61761089	61762317	19201	49524.4	21254.2	26179.8	16794.4	30365.4	17908.2	11007.3
chr9	61660086	61660587	Rplp1	chr9	-	61761089	61762317	19201	49524.4	21254.2	26179.8	16794.4	30365.4	17908.2	11007.3
chr9	61691218	61691698	Rplp1	chr9	-	61761089	61762317	19201	49524.4	21254.2	26179.8	16794.4	30365.4	17908.2	11007.3
chr9	61673557	61674164	Rplp1	chr9	-	61761089	61762317	19201	49524.4	21254.2	26179.8	16794.4	30365.4	17908.2	11007.3
chr9	61677147	61677504	Rplp1	chr9	-	61761089	61762317	19201	49524.4	21254.2	26179.8	16794.4	30365.4	17908.2	11007.3
chr9	61656118	61656968	Rplp1	chr9	-	61761089	61762317	19201	49524.4	21254.2	26179.8	16794.4	30365.4	17908.2	11007.3
chr9	61661169	61661557	Rplp1	chr9	-	61761089	61762317	19201	49524.4	21254.2	26179.8	16794.4	30365.4	17908.2	11007.3
chr9	61761119	61761474	Rplp1	chr9	-	61761089	61762317	19201	49524.4	21254.2	26179.8	16794.4	30365.4	17908.2	11007.3
chr9	61581247	61581670	Rplp1	chr9	-	61761089	61762317	19201	49524.4	21254.2	26179.8	16794.4	30365.4	17908.2	11007.3
chr9	61570171	61570456	Rplp1	chr9	-	61761089	61762317	19201	49524.4	21254.2	26179.8	16794.4	30365.4	17908.2	11007.3
chr2	90870793	90871515	Rapsn	chr2	+	90875783	90885886	4485	8090.45	5694.09	6282.23	2784.25	5032.24	6417.73	4473.82
chr11	106153188	106153497	Gh	chr11	-	106161581	106163124	3853	1671.77	781.084	965.806	861.899	1557.79	839.158	839.16
chr5	29080119	29080547	Shh	chr5	-	28783379	28793641	23104	14504.3	10732.8	17567.8	8447.07	15262.9	9124.32	10454.9
chr18	34806978	34807388	Cdc23	chr18	-	34791336	34811390	16660	20369.2	18476	23058.8	15418.7	27849.2	20047.5	17490.1
chr1	90103421	90104005	Dnajb3	chr1	-	90101306	90102323	3343	2615.85	2174.67	4737.87	2495.26	4503.51	2871.18	1693.96
chr13	11038610	11038960	Zp4-ps	chr13	+	11614318	11617949	1	622.561	1110.18	965.083	619.5	1117.95	1186.19	1197.3
chr11	81833314	81833727	Ccl2	chr11	+	81849078	81850954	473	656.008	582.524	891.645	767.676	1382.69	356.341	726.851
chr13	54526476	54527050	Thoc3	chr13	-	54560197	54570201	17827	24155.5	14686	18870.5	10235.7	18435.6	13292.7	13818
chr13	54541107	54541755	Thoc3	chr13	-	54560197	54570201	17827	24155.5	14686	18870.5	10235.7	18435.6	13292.7	13818
chr5	31380903	31381096	Cad	chr5	+	31357183	31380852	32981	37633.5	27434	49016.4	16620.5	29905.4	23654.3	19851.1
chr11	99021552	99021866	Ccr7	chr11	-	99005512	99016391	15105	8332.54	7135.78	5272.88	3995.72	7187.17	7023.69	6569.85
chr4	135696322	135696649	Id3	chr4	+	135699736	135701307	124338	130936	70744.8	83094.4	46181.1	83015	70915.8	27735.2
chr11	50998154	50998566	BC049762	chr11	-	51067152	51076453	10021	11813.4	15332.6	16815.2	11880.9	21317.7	15316.8	12474
chr14	56204249	56204905	Fam158a	chr14	-	56200360	56204091	11988	12822.4	8344.83	13750.3	11257.2	20186.2	8651.97	7225.82
chr4	89127246	89127661	Cdkn2b	chr4	-	88952197	88956941	1331	4419.61	3249.91	3962.31	2378.41	4263.19	3931.06	2186.04
chr5	28405755	28406255	Insig1	chr5	+	28397951	28405202	118228	15499.4	46065.3	78582.2	71066.9	127342	56935.1	47780.3
chr5	28386986	28387307	Insig1	chr5	+	28397951	28405202	118228	15499.4	46065.3	78582.2	71066.9	127342	56935.1	47780.3
chr5	28330143	28330464	Insig1	chr5	+	28397951	28405202	118228	15499.4	46065.3	78582.2	71066.9	127342	56935.1	47780.3
chr5	28324220	28324764	Insig1	chr5	+	28397951	28405202	118228	15499.4	46065.3	78582.2	71066.9	127342	56935.1	47780.3
chr5	28402453	28402911	Insig1	chr5	+	28397951	28405202	118228	15499.4	46065.3	78582.2	71066.9	127342	56935.1	47780.3
chr5	28381788	28382392	Insig1	chr5	+	28397951	28405202	118228	15499.4	46065.3	78582.2	71066.9	127342	56935.1	47780.3
chr5	28417086	28417614	Insig1	chr5	+	28397951	28405202	118228	15499.4	46065.3	78582.2	71066.9	127342	56935.1	47780.3
chr5	28402974	28403469	Insig1	chr5	+	28397951	28405202	118228	15499.4	46065.3	78582.2	71066.9	127342	56935.1	47780.3
chr5	28425226	28425632	Insig1	chr5	+	28397951	28405202	118228	15499.4	46065.3	78582.2	71066.9	127342	56935.1	47780.3
chr18	35822605	35823194	Spata24	chr18	-	35816342	35821840	14964	3908.75	6654	7069.58	7034.53	12598.7	8843.01	4553.69
chr5	146829778	146830419	Cyp3a25	chr5	-	146788769	146821194	137644	3280.42	76049.1	109848	92195.3	164981	40054.9	148372
chr5	146832684	146833209	Cyp3a25	chr5	-	146788769	146821194	137644	3280.42	76049.1	109848	92195.3	164981	40054.9	148372
chr5	146821022	146821660	Cyp3a25	chr5	-	146788769	146821194	137644	3280.42	76049.1	109848	92195.3	164981	40054.9	148372
chr14	122350589	122350995	Gpr183	chr14	-	122351552	122364415	4481	6176.79	11437	9444.88	8403.38	15021.1	12161.3	12400.8
chr14	70940531	70941101	Reep4	chr14	+	70945429	70948739	1	4804.26	5594.49	6761.62	3740.42	6680.58	7773.01	3574.1
chr15	60681367	60681640	Fam84b	chr15	-	60650550	60656635	12513	20786	15324.7	20611.1	9005.04	16075.1	15740	11841.3
chr17	71194739	71195353	Tgif1	chr17	-	71193544	71202872	160106	142752	93319.8	126803	76296	136180	105961	62404.6
chr17	71172531	71172943	Tgif1	chr17	-	71193544	71202872	160106	142752	93319.8	126803	76296	136180	105961	62404.6
chr17	71202309	71202806	Tgif1	chr17	-	71193544	71202872	160106	142752	93319.8	126803	76296	136180	105961	62404.6
chr5	115002213	115002810	BC057022	chr5	+	115018259	115063227	58293	142731	86625.2	87628.8	52140	92966.5	81602.4	56876.1
chr5	115046488	115046959	BC057022	chr5	+	115018259	115063227	58293	142731	86625.2	87628.8	52140	92966.5	81602.4	56876.1
chr1	166423174	166423525	Atp1b1	chr1	-	166367397	166388486	89521	256967	84917.7	96270.9	76353.3	136136	90339.7	75251.6
chr1	166411805	166412282	Atp1b1	chr1	-	166367397	166388486	89521	256967	84917.7	96270.9	76353.3	136136	90339.7	75251.6
chr3	89120847	89121359	Efna3	chr3	-	89118872	89126801	29505	12106.9	14855.8	20150.4	11072.7	19741.8	25563.6	8851.39
chr3	89109465	89110336	Efna3	chr3	-	89118872	89126801	29505	12106.9	14855.8	20150.4	11072.7	19741.8	25563.6	8851.39
chr15	89205607	89206158	Sco2	chr15	-	89202067	89204249	17337	38609	19898	40502.1	22679.7	40413	22938.2	8489.51
chr15	3197361	3198508	Sco2	chr15	-	89202067	89204249	17337	38609	19898	40502.1	22679.7	40413	22938.2	8489.51
chr6	89119636	89120135	Gm1965	chr6	+	89090998	89096010	3069	2144.81	2482.67	1621.93	1360.38	2421.06	2424.11	2392.77
chr6	89077371	89077815	Gm1965	chr6	+	89090998	89096010	3069	2144.81	2482.67	1621.93	1360.38	2421.06	2424.11	2392.77
chr3	88907277	88907775	Fdps	chr3	-	88897509	88905867	48975	20471.1	72587.6	152312	59555.9	105958	64769.6	56980.1
chr4	140413671	140414132	Padi1	chr4	-	140368895	140401693	27377	36679.8	25018.5	19617.1	15881.4	28229.6	24753.2	23610.9
chr4	140410400	140410934	Padi1	chr4	-	140368895	140401693	27377	36679.8	25018.5	19617.1	15881.4	28229.6	24753.2	23610.9
chr13	68461928	68462082	Mtrr	chr13	-	68699656	68720998	20818	37054.5	21864.2	26262.4	18887.1	33572.1	17447.4	17007.5
chr13	68360628	68361228	Mtrr	chr13	-	68699656	68720998	20818	37054.5	21864.2	26262.4	18887.1	33572.1	17447.4	17007.5
chr19	12082918	12083214	Olfr1423	chr19	-	12110297	12111230	473	404.756	87.7634	169.546	388.944	691.083	82.613	182.359
chr19	12080379	12080933	Olfr1423	chr19	-	12110297	12111230	473	404.756	87.7634	169.546	388.944	691.083	82.613	182.359
chr5	34277250	34277803	Whsc2	chr5	-	34240828	34278907	26391	48622.1	36031.5	54244.7	28354.3	50351.5	36074.3	26671.6
chr10	110958684	110959029	Phlda1	chr10	+	110943341	110945705	107129	109149	44623.2	54452.7	56209.2	99764	81581.5	13080.9
chr2	103924147	103924506	Cd59b	chr2	+	103911166	103925114	2125	281.718	1159.46	841.082	1609.1	2851.36	373.314	2132.38
chr8	35207573	35207834	Leprotl1	chr8	-	35198625	35209793	9408	12683.5	11536.6	13921.7	8414.17	14892.9	11075.4	11263.5
chr13	28387789	28388168	Prl5a1	chr13	+	28234352	28243464	709	749.58	1404.16	623.416	1052.45	1862.58	1358.81	1672.33
chr4	6205616	6206040	Cyp7a1	chr4	-	6192758	6202778	80081	1958.06	67771.3	20291.5	42750.4	75604.9	54297.5	149870
chr4	6173147	6173605	Cyp7a1	chr4	-	6192758	6202778	80081	1958.06	67771.3	20291.5	42750.4	75604.9	54297.5	149870
chr4	6202720	6203200	Cyp7a1	chr4	-	6192758	6202778	80081	1958.06	67771.3	20291.5	42750.4	75604.9	54297.5	149870
chr4	6166183	6166749	Cyp7a1	chr4	-	6192758	6202778	80081	1958.06	67771.3	20291.5	42750.4	75604.9	54297.5	149870
chr4	33344019	33344629	Pnrc1	chr4	-	33332397	33335762	90010	209860	64809.2	170030	54516.3	96329.2	89864.5	35692.1
chr4	33349018	33349384	Pnrc1	chr4	-	33332397	33335762	90010	209860	64809.2	170030	54516.3	96329.2	89864.5	35692.1
chr15	57853617	57854156	9130401M01Rik	chr15	-	57853826	57865849	13297	40925.2	22442.4	28431.6	15703.8	27743.2	20652	14185.7
chr5	28069835	28070104	Paxip1	chr5	-	28067204	28117879	34669	47485.3	41111.3	43379.7	32246.4	56949.8	41582.1	38347.1
chr1	174582481	174582910	Dusp23	chr1	-	174560899	174563105	31120	39070.5	19135.2	39796.2	15822.7	27940.8	16382.1	10510.7
chr12	92802667	92803060	Gtf2a1	chr12	-	92793701	92828927	170506	334882	139088	211053	113248	199906	179300	94639.9
chr2	167454250	167454806	Ube2v1	chr2	-	167433138	167457505	54116	70849.4	49233.6	72975.9	36540.1	64494.2	53397.9	34080.2
chr15	38325807	38326217	Klf10	chr15	-	38224167	38230462	179188	260277	98553.2	171043	49748.1	87703.3	59199.6	54920.3
chr15	38277294	38277656	Klf10	chr15	-	38224167	38230462	179188	260277	98553.2	171043	49748.1	87703.3	59199.6	54920.3
chr4	21232961	21233333	Prdm13	chr4	-	21604626	21613110	3777	4599.59	2777.04	3267.42	1861.76	3280.9	2554.47	3137.34
chr4	21349755	21350158	Prdm13	chr4	-	21604626	21613110	3777	4599.59	2777.04	3267.42	1861.76	3280.9	2554.47	3137.34
chr8	47448232	47448787	Helt	chr8	-	47377401	47380025	1181	1815.51	1289.34	650.384	727.934	1282.75	1238.92	1659.02
chr3	89088150	89088432	Efna1	chr3	-	89075651	89084873	309565	308837	280981	224629	114531	201762	200876	128458
chr3	89092426	89092947	Efna1	chr3	-	89075651	89084873	309565	308837	280981	224629	114531	201762	200876	128458
chr3	3015055	3015587	Efna1	chr3	-	89075651	89084873	309565	308837	280981	224629	114531	201762	200876	128458
chr3	89103953	89104314	Efna1	chr3	-	89075651	89084873	309565	308837	280981	224629	114531	201762	200876	128458
chr3	89085005	89085442	Efna1	chr3	-	89075651	89084873	309565	308837	280981	224629	114531	201762	200876	128458
chr4	153521015	153521383	Wdr8	chr4	+	153516480	153530927	41801	28560.5	25116	36257.9	18745.5	33003.3	29172.9	18567.4
chr4	153528124	153528656	Wdr8	chr4	+	153516480	153530927	41801	28560.5	25116	36257.9	18745.5	33003.3	29172.9	18567.4
chr5	146881619	146882007	Cyp3a59	chr5	+	146890833	146924859	22980	562.435	12093.6	8675.34	10897.4	19182.2	7468.95	25210.7
chr5	146925899	146926338	Cyp3a59	chr5	+	146890833	146924859	22980	562.435	12093.6	8675.34	10897.4	19182.2	7468.95	25210.7
chr5	146890443	146890885	Cyp3a59	chr5	+	146890833	146924859	22980	562.435	12093.6	8675.34	10897.4	19182.2	7468.95	25210.7
chr8	109642737	109643022	Terf2	chr8	-	109593301	109620445	31721	28838.1	31570.7	34787.7	25215.8	44362	35131.8	25979.8
chr10	75822358	75822902	Pcnt	chr10	-	75813998	75905657	105011	98906	79320	90201.8	66008.9	116096	78276.9	74532
chr2	172882339	172882655	Rbm38	chr2	+	172847402	172860232	24559	24616.2	16653.5	21998.4	13379	23506.9	19085.8	11469.9
chr9	119912479	119912797	Csrnp1	chr9	-	119880283	119893776	151513	459924	123174	158442	80791.3	141687	116549	66927.4
chr5	109461734	109462005	Vmn2r10	chr5	-	109424557	109435455	1	1	761.425	227.333	372.1	652.554	510.178	1523.42
chr8	93657139	93657596	Aktip	chr8	-	93647397	93659395	25489	32646.7	26930.5	48984.6	23689.5	41527.3	29594	19130.2
chr6	86335305	86335689	Pcyox1	chr6	-	86335999	86347144	61900	89164.5	53139.4	107434	50224.5	87873.1	55953.9	39051.8
chr6	86341559	86341775	Pcyox1	chr6	-	86335999	86347144	61900	89164.5	53139.4	107434	50224.5	87873.1	55953.9	39051.8
chr10	38885991	38886567	Wisp3	chr10	-	38870776	38883600	4249	4588.05	6418.08	3953.4	6433.4	11254.8	6050.83	7066.5
chr7	135175861	135176219	Trim72	chr7	+	135147891	135154907	6373	21838.4	11841.7	17626.1	6876.08	12021.6	12434.3	8355.57
chr12	8800096	8800523	Sdc1	chr12	+	8778201	8800493	114977	224779	140459	140139	159848	279327	111673	100012
chr12	8839806	8840077	Sdc1	chr12	+	8778201	8800493	114977	224779	140459	140139	159848	279327	111673	100012
chr12	8800646	8800945	Sdc1	chr12	+	8778201	8800493	114977	224779	140459	140139	159848	279327	111673	100012
chr12	8816483	8816871	Sdc1	chr12	+	8778201	8800493	114977	224779	140459	140139	159848	279327	111673	100012
chr12	8804848	8805345	Sdc1	chr12	+	8778201	8800493	114977	224779	140459	140139	159848	279327	111673	100012
chr4	115031832	115032189	Cyp4a12b	chr4	+	115084228	115111639	237	94.5725	1704.29	793.166	1547.25	2700.3	1698.26	2436.86
chr5	105668421	105668991	Gbp10	chr5	-	105644717	105668552	237	375.29	570.205	175.566	337.622	588.848	340.452	1010.54
chr5	105627137	105627585	Gbp10	chr5	-	105644717	105668552	237	375.29	570.205	175.566	337.622	588.848	340.452	1010.54
chr5	105667375	105667837	Gbp10	chr5	-	105644717	105668552	237	375.29	570.205	175.566	337.622	588.848	340.452	1010.54
chr5	105640801	105641375	Gbp10	chr5	-	105644717	105668552	237	375.29	570.205	175.566	337.622	588.848	340.452	1010.54
chr5	105627994	105628494	Gbp10	chr5	-	105644717	105668552	237	375.29	570.205	175.566	337.622	588.848	340.452	1010.54
chr5	90631480	90631889	Cox18	chr5	-	90643749	90653021	15461	63991.1	23058.4	37091.5	20133.6	35096.4	22694.8	11967.4
chr5	90629012	90629365	Cox18	chr5	-	90643749	90653021	15461	63991.1	23058.4	37091.5	20133.6	35096.4	22694.8	11967.4
chr8	20020237	20020657	2610005L07Rik	chr8	-	19981359	20020392	11933	21974.2	13422.5	15894.9	10792.9	18809.5	12405.4	9699.95
chr8	19999596	20000022	2610005L07Rik	chr8	-	19981359	20020392	11933	21974.2	13422.5	15894.9	10792.9	18809.5	12405.4	9699.95
chr8	20004048	20004478	2610005L07Rik	chr8	-	19981359	20020392	11933	21974.2	13422.5	15894.9	10792.9	18809.5	12405.4	9699.95
chr8	19980084	19980910	2610005L07Rik	chr8	-	19981359	20020392	11933	21974.2	13422.5	15894.9	10792.9	18809.5	12405.4	9699.95
chr8	19985556	19985987	2610005L07Rik	chr8	-	19981359	20020392	11933	21974.2	13422.5	15894.9	10792.9	18809.5	12405.4	9699.95
chr8	20005848	20006352	2610005L07Rik	chr8	-	19981359	20020392	11933	21974.2	13422.5	15894.9	10792.9	18809.5	12405.4	9699.95
chr8	19994006	19994452	2610005L07Rik	chr8	-	19981359	20020392	11933	21974.2	13422.5	15894.9	10792.9	18809.5	12405.4	9699.95
chr8	20026069	20026484	2610005L07Rik	chr8	-	19981359	20020392	11933	21974.2	13422.5	15894.9	10792.9	18809.5	12405.4	9699.95
chr8	19996282	19996695	2610005L07Rik	chr8	-	19981359	20020392	11933	21974.2	13422.5	15894.9	10792.9	18809.5	12405.4	9699.95
chr8	19988019	19988442	2610005L07Rik	chr8	-	19981359	20020392	11933	21974.2	13422.5	15894.9	10792.9	18809.5	12405.4	9699.95
chr8	19982194	19983102	2610005L07Rik	chr8	-	19981359	20020392	11933	21974.2	13422.5	15894.9	10792.9	18809.5	12405.4	9699.95
chr8	20022441	20023399	2610005L07Rik	chr8	-	19981359	20020392	11933	21974.2	13422.5	15894.9	10792.9	18809.5	12405.4	9699.95
chr19	24989631	24990054	Foxd4	chr19	-	24973454	24975799	1181	2771.54	1431.55	1305.55	855.319	1490.27	992.995	971.02
chr3	50794693	50795185	Ccrn4l	chr3	+	51028368	51055576	67634	108025	62634	95929.5	75117.6	130873	59632.3	69960.6
chr3	50692161	50692797	Ccrn4l	chr3	+	51028368	51055576	67634	108025	62634	95929.5	75117.6	130873	59632.3	69960.6
chr3	51005869	51006290	Ccrn4l	chr3	+	51028368	51055576	67634	108025	62634	95929.5	75117.6	130873	59632.3	69960.6
chr3	50963090	50963370	Ccrn4l	chr3	+	51028368	51055576	67634	108025	62634	95929.5	75117.6	130873	59632.3	69960.6
chr3	50960291	50960866	Ccrn4l	chr3	+	51028368	51055576	67634	108025	62634	95929.5	75117.6	130873	59632.3	69960.6
chr3	50959570	50959949	Ccrn4l	chr3	+	51028368	51055576	67634	108025	62634	95929.5	75117.6	130873	59632.3	69960.6
chr3	50794224	50794638	Ccrn4l	chr3	+	51028368	51055576	67634	108025	62634	95929.5	75117.6	130873	59632.3	69960.6
chr3	50823643	50824323	Ccrn4l	chr3	+	51028368	51055576	67634	108025	62634	95929.5	75117.6	130873	59632.3	69960.6
chr3	50961035	50961331	Ccrn4l	chr3	+	51028368	51055576	67634	108025	62634	95929.5	75117.6	130873	59632.3	69960.6
chr9	62938850	62939659	Skor1	chr9	-	62985970	62996768	16757	10139.1	6455.83	4387.29	3773.85	6568.8	6435.78	6293.65
chr9	62983445	62983864	Skor1	chr9	-	62985970	62996768	16757	10139.1	6455.83	4387.29	3773.85	6568.8	6435.78	6293.65
chr9	62946573	62947144	Skor1	chr9	-	62985970	62996768	16757	10139.1	6455.83	4387.29	3773.85	6568.8	6435.78	6293.65
chr9	21059864	21060217	S1pr5	chr9	-	21047360	21052887	14538	10902.8	9035.53	12415.4	6209.42	10799.7	11106.5	8674.19
chr14	61977034	61977707	Ebpl	chr14	-	61958599	61979282	66516	43405.5	53194	102460	50575.8	87913.5	66951.1	40393.7
chr14	61979835	61980387	Ebpl	chr14	-	61958599	61979282	66516	43405.5	53194	102460	50575.8	87913.5	66951.1	40393.7
chr8	13364974	13365370	Tfdp1	chr8	+	13339673	13377702	56641	61735.4	64355.5	72872.8	59351.7	103081	63489.4	52151.6
chr15	83986263	83986948	Pnpla3	chr15	+	83998245	84019951	16049	13782.4	14851.7	11663.4	10687.1	18538.3	13350.5	16153.6
chr15	83999886	84000360	Pnpla3	chr15	+	83998245	84019951	16049	13782.4	14851.7	11663.4	10687.1	18538.3	13350.5	16153.6
chr11	106836896	106837358	Kpna2	chr11	-	106849942	106860839	17357	48641.2	26096.9	31524.6	21394	37107.9	35976.1	17616.1
chr11	100990000	100990152	Tubg1	chr11	+	100981444	100987733	4013	3505.39	5241.67	4363.45	4261.54	7383.25	5602.32	6010.8
chr4	62817743	62818349	Ambp	chr4	-	62804312	62815176	108934	429767	161501	187072	105467	182666	180755	64267.7
chr2	118986875	118987186	Fam82a2	chr2	-	118962733	118982770	51112	43760.7	32850	44951.5	27385.5	47398.9	31753.5	25688.6
chr17	80182219	80182482	Cyp1b1	chr17	-	80106292	80114381	5930	5163.42	3001.68	2183.67	2406.57	4165.15	2971.21	3289.58
chr14	37840971	37841582	Rgr	chr14	-	37850675	37862150	3541	3499.02	6285.45	5538.22	5188.76	8975.51	5856.55	8201.66
chr14	37845596	37846024	Rgr	chr14	-	37850675	37862150	3541	3499.02	6285.45	5538.22	5188.76	8975.51	5856.55	8201.66
chr9	58090003	58090435	Pml	chr9	-	58064986	58097593	64814	32013.2	44176.3	54379.7	46140	79687.1	50142.8	43876.1
chr9	58097422	58097876	Pml	chr9	-	58064986	58097593	64814	32013.2	44176.3	54379.7	46140	79687.1	50142.8	43876.1
chr9	58096407	58096821	Pml	chr9	-	58064986	58097593	64814	32013.2	44176.3	54379.7	46140	79687.1	50142.8	43876.1
chr9	75245748	75246134	Mapk6	chr9	-	75234707	75257821	46879	79573.9	42552.9	52206.9	31063.4	53644	40380.3	31445.1
chr11	102272424	102272873	Slc25a39	chr11	-	102264294	102268831	103022	135357	62832.6	69913.9	44043.7	76045.2	56682.3	37667.1
chr8	114389176	114389703	Tmem170	chr8	-	114388797	114400575	35929	50854.3	29576.4	43817.9	21039.2	36315.6	26245.7	19230.4
chr9	108999991	109000475	Plxnb1	chr9	+	108997949	109022429	88978	79670.7	94830	112733	72323.3	124788	107063	54927.8
chr9	108995295	108995673	Plxnb1	chr9	+	108997949	109022429	88978	79670.7	94830	112733	72323.3	124788	107063	54927.8
chr12	76807507	76808101	Sgpp1	chr12	-	76815234	76836716	20866	39212.3	28959.3	44397.5	20873.9	35996.3	27870.4	26571.7
chr12	76854037	76854304	Sgpp1	chr12	-	76815234	76836716	20866	39212.3	28959.3	44397.5	20873.9	35996.3	27870.4	26571.7
chr11	102022473	102022827	Tmem101	chr11	-	102013860	102017721	46846	42240.4	39790.9	56903.3	37756.8	65098.4	50355.1	26490.2
chr11	120947686	120948278	Sectm1a	chr11	-	120928716	120942453	6609	7633.33	7675.24	5140.45	5155.34	8887.01	7402.14	8810.63
chr5	123239712	123240324	Anapc5	chr5	-	123237469	123271348	60066	52506.7	50323.8	69236.8	40051.9	69028.4	54631.1	45099
chr5	123247865	123248210	Anapc5	chr5	-	123237469	123271348	60066	52506.7	50323.8	69236.8	40051.9	69028.4	54631.1	45099
chr5	123251684	123252145	Anapc5	chr5	-	123237469	123271348	60066	52506.7	50323.8	69236.8	40051.9	69028.4	54631.1	45099
chr5	123252699	123253062	Anapc5	chr5	-	123237469	123271348	60066	52506.7	50323.8	69236.8	40051.9	69028.4	54631.1	45099
chr4	147589588	147590035	Fbxo2	chr4	+	147534776	147540526	5853	10019.2	4127.9	6811.95	5283.25	9102.54	4319.26	3325.36
chr11	115640523	115640902	2310067B10Rik	chr11	+	115626746	115660347	67319	96577	74680.2	100800	59223.5	102027	86646.9	47430.5
chr17	34864908	34865301	C4b	chr17	-	34865325	34880842	26270	79548.8	58890.3	89876.7	46809.6	80639.2	69896	38118.8
chr10	86797921	86798344	Ascl1	chr10	-	86953785	86956405	1581	2034.11	671.123	668.202	422.896	728.467	769.823	369.125
chr10	86834609	86834920	Ascl1	chr10	-	86953785	86956405	1581	2034.11	671.123	668.202	422.896	728.467	769.823	369.125
chr11	31647101	31647439	Bod1	chr11	-	31565149	31571862	8244	10571.1	7293.84	8116.49	4006.77	6901.45	7386.25	5531.61
chr11	31576907	31577404	Bod1	chr11	-	31565149	31571862	8244	10571.1	7293.84	8116.49	4006.77	6901.45	7386.25	5531.61
chr11	31631732	31632187	Bod1	chr11	-	31565149	31571862	8244	10571.1	7293.84	8116.49	4006.77	6901.45	7386.25	5531.61
chr13	101518444	101518749	Mrps36	chr13	-	101505894	101514614	24218	29334.2	19390.8	32897.3	18011.7	31023.1	19882.1	15685.2
chr3	120871336	120871930	Rwdd3	chr3	-	120858319	120874613	15069	10892	12891.1	19040.7	10842.9	18651.9	12176.9	18102.4
chr3	120412437	120412868	Rwdd3	chr3	-	120858319	120874613	15069	10892	12891.1	19040.7	10842.9	18651.9	12176.9	18102.4
chr3	120874547	120875124	Rwdd3	chr3	-	120858319	120874613	15069	10892	12891.1	19040.7	10842.9	18651.9	12176.9	18102.4
chr3	120889850	120890172	Rwdd3	chr3	-	120858319	120874613	15069	10892	12891.1	19040.7	10842.9	18651.9	12176.9	18102.4
chr3	120624317	120624648	Rwdd3	chr3	-	120858319	120874613	15069	10892	12891.1	19040.7	10842.9	18651.9	12176.9	18102.4
chr3	120593776	120594160	Rwdd3	chr3	-	120858319	120874613	15069	10892	12891.1	19040.7	10842.9	18651.9	12176.9	18102.4
chr3	120872057	120872483	Rwdd3	chr3	-	120858319	120874613	15069	10892	12891.1	19040.7	10842.9	18651.9	12176.9	18102.4
chr7	25390346	25390886	Ethe1	chr7	+	25372561	25393944	34929	23033.8	31458.4	53757.6	26957.6	46353.7	34401.9	27572.1
chr7	25384524	25385037	Ethe1	chr7	+	25372561	25393944	34929	23033.8	31458.4	53757.6	26957.6	46353.7	34401.9	27572.1
chr2	165978900	165979313	Sulf2	chr2	-	165898588	165981156	122013	94377.9	78693.7	71926.8	67217.4	115553	76388.9	82341.2
chr2	165917802	165918227	Sulf2	chr2	-	165898588	165981156	122013	94377.9	78693.7	71926.8	67217.4	115553	76388.9	82341.2
chr4	150417475	150417826	Per3	chr4	-	150377763	150418731	78962	43730.4	48449.2	28269.5	35388.4	60834.3	37834	54196.9
chr7	133780211	133780621	Nupr1	chr7	-	133766759	133768984	1141	2066.76	2892.37	3116.69	2318.14	3983.19	2980.96	2265.49
chr7	133765922	133766383	Nupr1	chr7	-	133766759	133768984	1141	2066.76	2892.37	3116.69	2318.14	3983.19	2980.96	2265.49
chr9	20954458	20954820	Cdc37	chr9	-	20942984	20954350	32395	38394.8	23400.2	33620.2	16956.6	29126.4	23579.9	17356.1
chr17	48536532	48536888	Nfya	chr17	-	48526209	48549145	72853	90043.3	51113	89234.1	41011.2	70400.1	53029.9	38883.3
chr10	75267034	75267440	Gstt1	chr10	-	75246557	75261329	68122	35233.7	25013	35549.5	34412	59070	26764.3	28332.5
chr10	75252536	75253254	Gstt1	chr10	-	75246557	75261329	68122	35233.7	25013	35549.5	34412	59070	26764.3	28332.5
chr10	75257807	75258129	Gstt1	chr10	-	75246557	75261329	68122	35233.7	25013	35549.5	34412	59070	26764.3	28332.5
chr14	76245952	76246250	Tpt1	chr14	+	76245062	76248110	10984	20007.2	11773.2	16135.7	6984.52	11971.6	12231.7	7485.38
chr14	21024920	21025441	Kcnk5	chr14	-	20959279	21001004	275896	65567.1	101801	135430	124836	213440	120355	128829
chr14	20984541	20984969	Kcnk5	chr14	-	20959279	21001004	275896	65567.1	101801	135430	124836	213440	120355	128829
chr14	21027482	21028040	Kcnk5	chr14	-	20959279	21001004	275896	65567.1	101801	135430	124836	213440	120355	128829
chr6	24863498	24864031	Tmem229a	chr6	-	24901140	24906125	4249	2340.31	2039.42	2593	1556.46	2660.24	2456.97	2132.38
chr6	24859148	24859569	Tmem229a	chr6	-	24901140	24906125	4249	2340.31	2039.42	2593	1556.46	2660.24	2456.97	2132.38
chr6	72410345	72410803	Mat2a	chr6	-	72382792	72389552	49308	120219	52793.8	62290.1	44096.9	75320.4	58793.8	32879.8
chr3	96303357	96303727	Hfe2	chr3	+	96329107	96333139	40982	14469.3	23745.7	54609.7	31184.4	53243.8	33186.4	19077.8
chr3	96329400	96329679	Hfe2	chr3	+	96329107	96333139	40982	14469.3	23745.7	54609.7	31184.4	53243.8	33186.4	19077.8
chr8	108522775	108523374	Dpep2	chr8	-	108508956	108520323	12273	8111.15	8766.86	7905.81	3881.49	6622.97	6274.36	8652.56
chr8	108517218	108518017	Dpep2	chr8	-	108508956	108520323	12273	8111.15	8766.86	7905.81	3881.49	6622.97	6274.36	8652.56
chr8	97668035	97668481	Kifc3	chr8	-	97623727	97666440	64756	73176.7	65948.9	124368	68891.1	117479	86232	45573.2
chr19	10242510	10242947	Fads1	chr19	+	10257377	10271362	134760	70538.8	80233	135105	88455.7	150828	89382	70953.5
chr19	10223065	10223478	Fads1	chr19	+	10257377	10271362	134760	70538.8	80233	135105	88455.7	150828	89382	70953.5
chr19	10268369	10268624	Fads1	chr19	+	10257377	10271362	134760	70538.8	80233	135105	88455.7	150828	89382	70953.5
chr2	180294873	180295199	1600027N09Rik	chr2	+	180316008	180320339	25253	31167.4	17463	30025.1	17264.2	29433.9	20907.3	11464.9
chr3	19603170	19603594	Crh	chr3	-	19593400	19595396	1889	2153.17	741.634	808.576	928.749	1583.35	797.629	836.665
chr14	102940836	102941241	Kctd12	chr14	-	103375797	103381854	34313	112997	31383.4	62538.6	20599.9	35113.6	28340.9	15205.6
chr14	103352786	103353195	Kctd12	chr14	-	103375797	103381854	34313	112997	31383.4	62538.6	20599.9	35113.6	28340.9	15205.6
chr14	102918455	102918884	Kctd12	chr14	-	103375797	103381854	34313	112997	31383.4	62538.6	20599.9	35113.6	28340.9	15205.6
chr2	23903893	23904265	Hnmt	chr2	-	23858431	23904899	43369	37055.7	29812.6	22642.8	25876.7	44094.6	36495	38776.4
chr2	23680740	23681001	Hnmt	chr2	-	23858431	23904899	43369	37055.7	29812.6	22642.8	25876.7	44094.6	36495	38776.4
chr2	23898390	23898873	Hnmt	chr2	-	23858431	23904899	43369	37055.7	29812.6	22642.8	25876.7	44094.6	36495	38776.4
chr9	66800696	66801012	Rps27l	chr9	+	66793924	66797316	3069	488.772	2177.56	1727.87	1921.77	3274.41	2074.91	2570.39
chr6	115799267	115799603	Mbd4	chr6	-	115790714	115803359	8699	4218.93	8370.78	7376.33	7697.77	13108.4	10560.5	7876.8
chr5	137758323	137758645	Trip6	chr5	-	137751126	137755469	24287	19005.8	14887	19570.4	10404.2	17709.7	16163.3	10167.1
chr13	41117394	41117856	Tmem14c	chr13	+	41111618	41117951	20051	14036.9	19960.4	27442.9	18925.2	32204.9	18038.9	20627.2
chr16	78632044	78632507	D16Ertd472e	chr16	-	78540582	78576913	35622	72571.9	36325.8	55596.9	27657.9	47061.3	33737.1	27965.2
chr16	78555459	78555831	D16Ertd472e	chr16	-	78540582	78576913	35622	72571.9	36325.8	55596.9	27657.9	47061.3	33737.1	27965.2
chr4	149154614	149155097	Slc25a33	chr4	-	149118144	149148376	67081	121142	45757.3	73640.2	35024.9	59557.6	52108.3	32099
chr4	149191768	149192042	Slc25a33	chr4	-	149118144	149148376	67081	121142	45757.3	73640.2	35024.9	59557.6	52108.3	32099
chr4	149166252	149166686	Slc25a33	chr4	-	149118144	149148376	67081	121142	45757.3	73640.2	35024.9	59557.6	52108.3	32099
chr4	149150104	149150456	Slc25a33	chr4	-	149118144	149148376	67081	121142	45757.3	73640.2	35024.9	59557.6	52108.3	32099
chr4	149168207	149168513	Slc25a33	chr4	-	149118144	149148376	67081	121142	45757.3	73640.2	35024.9	59557.6	52108.3	32099
chr4	149172793	149173323	Slc25a33	chr4	-	149118144	149148376	67081	121142	45757.3	73640.2	35024.9	59557.6	52108.3	32099
chr3	137392923	137393182	Ddit4l	chr3	+	137286635	137291296	1417	990.48	1872.31	1319.03	1255.11	2134.19	2553.03	2227.64
chr3	137275039	137275300	Ddit4l	chr3	+	137286635	137291296	1417	990.48	1872.31	1319.03	1255.11	2134.19	2553.03	2227.64
chr7	28838453	28839138	Psmc4	chr7	-	28826720	28835111	44767	46303.1	32340.2	50182.7	32862.8	55845.5	31758.9	20420.1
chr7	28844949	28845294	Psmc4	chr7	-	28826720	28835111	44767	46303.1	32340.2	50182.7	32862.8	55845.5	31758.9	20420.1
chr16	38450844	38451127	Adprh	chr16	-	38445478	38452769	15682	38442.2	22089.9	36416.6	21539.8	36594.5	25976	14799.6
chr13	54682793	54683097	Arl10	chr13	+	54676373	54682489	17220	23492.9	18987.2	33203.6	19900.1	33804	21677.5	10067.7
chr15	78411695	78412234	Rac2	chr15	-	78389598	78403213	27042	27835	18039.8	19652	13496.4	22900.4	18964.5	16136.9
chr3	94706700	94707063	Psmb4	chr3	-	94688245	94690880	18848	29562	15375.6	22953.6	13864.1	23520.7	15327.3	11266
chr10	77096625	77097184	Ube2g2	chr10	+	77085065	77108735	37506	116412	49600.4	99622.3	42937.2	72801.1	45534.9	35318.1
chr10	77089375	77089871	Ube2g2	chr10	+	77085065	77108735	37506	116412	49600.4	99622.3	42937.2	72801.1	45534.9	35318.1
chr10	77098889	77099306	Ube2g2	chr10	+	77085065	77108735	37506	116412	49600.4	99622.3	42937.2	72801.1	45534.9	35318.1
chr11	96690325	96690945	Nfe2l1	chr11	-	96678727	96691282	90456	144997	73986.6	149472	57264.1	97076.5	78450.6	57534.2
chr14	22814173	22814528	Zfp503	chr14	-	22803183	22808823	22857	25383.4	15030.5	20789.9	11530.1	19522.5	14084.3	11798.1
chr14	22790193	22790539	Zfp503	chr14	-	22803183	22808823	22857	25383.4	15030.5	20789.9	11530.1	19522.5	14084.3	11798.1
chr17	46602236	46602696	Ttbk1	chr17	-	46579396	46624624	88838	87602.8	71457.9	98532.1	56346.6	95314.1	77948.6	62108.1
chr17	46589086	46589547	Ttbk1	chr17	-	46579396	46624624	88838	87602.8	71457.9	98532.1	56346.6	95314.1	77948.6	62108.1
chr1	74508206	74508609	Usp37	chr1	-	74482083	74590860	58293	81198.5	81238.8	84853.1	83614.8	141402	89264.6	72153.9
chr8	27474411	27474815	Thap1	chr8	+	27268640	27274623	19448	21389.7	12937.4	17460.2	8511.29	14390.1	11397.2	8616.79
chr8	27274516	27274996	Thap1	chr8	+	27268640	27274623	19448	21389.7	12937.4	17460.2	8511.29	14390.1	11397.2	8616.79
chr3	87834607	87835020	Hapln2	chr3	-	87825671	87831433	2361	12455.3	4069.05	5194.87	3251.41	5492.67	5226.04	2630.7
chr7	125239713	125239979	Rps15a	chr7	-	125247889	125259661	23408	50448.1	35591.7	40409.7	28626.2	48357.5	34267.3	24301.8
chr7	124896556	124897178	Rps15a	chr7	-	125247889	125259661	23408	50448.1	35591.7	40409.7	28626.2	48357.5	34267.3	24301.8
chr5	118752740	118753229	2410131K14Rik	chr5	+	118695235	118713123	16953	20411.4	17110.3	26700.1	15154.2	25595.5	13840.9	15949.3
chr2	166267236	166267601	5031425F14Rik	chr2	+	166272950	166284270	4013	8235.38	8234.61	7280.02	5505.65	9290.61	8062.99	8924.6
chr1	113472117	113472520	Dsel	chr1	-	113755278	113761495	1335	3846.63	3706.53	3671.93	2801.62	4727.06	3966.81	3062.89
chr1	134052333	134052801	Cdk18	chr1	-	134010123	134036262	75991	72590.6	58987.4	90348.4	47412	79988.1	55293.1	44941
chr1	134053898	134054343	Cdk18	chr1	-	134010123	134036262	75991	72590.6	58987.4	90348.4	47412	79988.1	55293.1	44941
chr5	114602472	114602754	Acacb	chr5	+	114615526	114700767	115405	246403	109819	104577	105882	178609	93316.8	85662.2
chr5	114622995	114623302	Acacb	chr5	+	114615526	114700767	115405	246403	109819	104577	105882	178609	93316.8	85662.2
chr5	114606490	114606843	Acacb	chr5	+	114615526	114700767	115405	246403	109819	104577	105882	178609	93316.8	85662.2
chr10	126604782	126605531	B4galnt1	chr10	+	126602280	126609386	57245	71810.6	50625.2	88127.5	40410.9	68166.6	57701	32447.6
chr12	34733634	34734067	Twist1	chr12	+	34642535	34644696	1181	1848.56	955.397	1270.63	372.1	627.377	1273.95	914.449
chr7	54088758	54089152	Ldha	chr7	+	54101173	54110997	54857	200168	91212.8	116500	55015.1	92679.6	107337	38158.3
chr7	54085308	54085652	Ldha	chr7	+	54101173	54110997	54857	200168	91212.8	116500	55015.1	92679.6	107337	38158.3
chr16	5508791	5509015	Fam86	chr16	-	5244247	5256049	25259	39231.8	37725.9	63016.5	29157.1	49114.8	45783.3	20891.4
chr16	5515421	5515685	Fam86	chr16	-	5244247	5256049	25259	39231.8	37725.9	63016.5	29157.1	49114.8	45783.3	20891.4
chr16	5532379	5532825	Fam86	chr16	-	5244247	5256049	25259	39231.8	37725.9	63016.5	29157.1	49114.8	45783.3	20891.4
chr16	5529733	5530224	Fam86	chr16	-	5244247	5256049	25259	39231.8	37725.9	63016.5	29157.1	49114.8	45783.3	20891.4
chr3	143942720	143943153	Lmo4	chr3	-	143851493	143868219	48327	96778.9	32774.8	58234.1	25266.1	42515.7	37578.4	16892.3
chr3	143862136	143862495	Lmo4	chr3	-	143851493	143868219	48327	96778.9	32774.8	58234.1	25266.1	42515.7	37578.4	16892.3
chr3	143929571	143930021	Lmo4	chr3	-	143851493	143868219	48327	96778.9	32774.8	58234.1	25266.1	42515.7	37578.4	16892.3
chr3	143927453	143927857	Lmo4	chr3	-	143851493	143868219	48327	96778.9	32774.8	58234.1	25266.1	42515.7	37578.4	16892.3
chr15	103067880	103068253	Cbx5	chr15	-	103021976	103070247	18714	20195.5	30845.1	30786.7	34435.1	57939.4	33985.6	30463
chr5	123151908	123152324	P2rx4	chr5	+	123157565	123179051	34243	32498.1	37334.3	36271.4	26122.7	43946.2	37387	31147.3
chr5	123148437	123148782	P2rx4	chr5	+	123157565	123179051	34243	32498.1	37334.3	36271.4	26122.7	43946.2	37387	31147.3
chr5	123143824	123144310	P2rx4	chr5	+	123157565	123179051	34243	32498.1	37334.3	36271.4	26122.7	43946.2	37387	31147.3
chr2	180924011	180924575	Ppdpf	chr2	+	180922047	180923209	7055	11134.9	4731.57	10716.7	4432.35	7448.48	4277.74	2736.36
chr3	113478981	113479435	Rnpc3	chr3	-	113307984	113333067	30004	58383.5	38363.7	51112.6	36576.4	61343.2	44994.3	25089.2
chr6	34842678	34843139	Wdr91	chr6	-	34830425	34860831	50427	41017.6	40077.8	68267	37406.8	62729.5	45038.4	37183.3
chr5	33922949	33923422	Fam53a	chr5	-	33943001	33972284	59914	166249	66597.7	106727	46402.4	77619.1	65989.1	40766
chr7	29547226	29547566	Nfkbib	chr7	-	29543269	29551543	23776	44625.1	17141.9	27675.8	16785	28059	15545.4	13803
chr19	45824212	45824476	Npm3	chr19	-	45822223	45824053	15022	18095.5	6377.72	10883.3	5287.46	8837.8	7957.54	2934.35
chr5	149862828	149863253	Hmgb1	chr5	-	149858803	149864613	42246	59225.6	28851.7	48158.9	23268.2	38856.6	41341.2	14372.4
chr5	149850318	149850661	Hmgb1	chr5	-	149858803	149864613	42246	59225.6	28851.7	48158.9	23268.2	38856.6	41341.2	14372.4
chr11	84997775	84998278	1700125H20Rik	chr11	+	84984597	84994656	1889	5615.35	3576.91	2955.85	2165.75	3615.83	2604.31	4059.53
chr7	104897448	104897751	Aqp11	chr7	-	104874888	104886757	42647	45583.2	29384.2	43676.3	27725	46260.6	35076.5	24665
chr7	104884593	104885253	Aqp11	chr7	-	104874888	104886757	42647	45583.2	29384.2	43676.3	27725	46260.6	35076.5	24665
chr7	104897799	104898131	Aqp11	chr7	-	104874888	104886757	42647	45583.2	29384.2	43676.3	27725	46260.6	35076.5	24665
chr7	13581088	13581495	Slc27a5	chr7	-	13573695	13583541	76011	52849.2	48416.8	41245.7	49053.8	81843.2	57354.7	49016.5
chr19	3912914	3913492	Ndufs8	chr19	-	3908869	3912717	25482	27618.4	18963.9	33535.6	17747.2	29595.2	18510.2	12493.1
chr11	50659437	50660038	Zfp879	chr11	-	50645536	50655054	7321	7780.66	8215.34	10563.8	8442.34	14073.1	8848.06	6796.55
chr18	32683383	32683804	Gypc	chr18	-	32687973	32719688	37495	21857.6	22987.8	20657	19673.2	32780.5	21919.1	26215.7
chr11	120919382	120919768	Sectm1b	chr11	-	120914736	120924883	22657	4138.5	8466.07	8403.02	8227.05	13703.5	8498.86	11316.8
chr13	30031974	30032383	E2f3	chr13	-	29998443	30077932	52169	51336.1	67171.6	67387.6	62920.8	104783	72743.1	68312.9
chr13	30036737	30037160	E2f3	chr13	-	29998443	30077932	52169	51336.1	67171.6	67387.6	62920.8	104783	72743.1	68312.9
chr5	135231216	135231476	Eln	chr5	-	135178465	135223124	35509	25713.5	25216	22890.5	20029.6	33348.9	23657.9	28217.7
chr8	11632514	11633037	Ankrd10	chr8	-	11611582	11635754	55593	38945.1	35525.9	64213.9	31029.4	51659.9	38442.2	25853.4
chr1	75145062	75145366	Fam134a	chr1	+	75139359	75144483	25134	11180.3	14247.1	19307.9	14821	24642.6	15689.8	12167.8
chr12	106237958	106238351	4831426I19Rik	chr12	-	106168158	106248019	116353	78756.4	85104.4	82652.1	71075.8	118173	83104.7	98754.2
chr3	130527940	130528347	Rpl34-ps1	chr3	-	130429754	130433247	26570	50952.6	28067.6	34058.1	20053.8	33311.5	27683.7	17608.6
chr16	10541763	10542029	Dexi	chr16	-	10530299	10543147	61245	56860.1	37773.5	70451.6	32549.3	54062.1	40572.4	28359.1
chr16	10533760	10534306	Dexi	chr16	-	10530299	10543147	61245	56860.1	37773.5	70451.6	32549.3	54062.1	40572.4	28359.1
chr4	40989479	40989809	Aqp7	chr4	-	40980106	40995169	9677	10257.3	7342.99	7218.14	4878.72	8098.89	6645.96	7410.09
chr7	150964365	150964743	Mrgpre	chr7	-	150964267	150970405	6484	7609.44	7372.74	6061.19	3959.4	6572.24	8692.06	6815.68
chr8	118348215	118348502	Maf	chr8	-	118227152	118230794	8187	11971.9	7012.45	8627.19	5719.62	9490.88	8355.13	5239.61
chr8	118281068	118281435	Maf	chr8	-	118227152	118230794	8187	11971.9	7012.45	8627.19	5719.62	9490.88	8355.13	5239.61
chr8	118437077	118437517	Maf	chr8	-	118227152	118230794	8187	11971.9	7012.45	8627.19	5719.62	9490.88	8355.13	5239.61
chr8	117947197	117947433	Maf	chr8	-	118227152	118230794	8187	11971.9	7012.45	8627.19	5719.62	9490.88	8355.13	5239.61
chr8	118355433	118355957	Maf	chr8	-	118227152	118230794	8187	11971.9	7012.45	8627.19	5719.62	9490.88	8355.13	5239.61
chr8	118495354	118495829	Maf	chr8	-	118227152	118230794	8187	11971.9	7012.45	8627.19	5719.62	9490.88	8355.13	5239.61
chr8	118243643	118244215	Maf	chr8	-	118227152	118230794	8187	11971.9	7012.45	8627.19	5719.62	9490.88	8355.13	5239.61
chr8	118549756	118550099	Maf	chr8	-	118227152	118230794	8187	11971.9	7012.45	8627.19	5719.62	9490.88	8355.13	5239.61
chr13	54663902	54664168	4833439L19Rik	chr13	-	54652579	54666743	49377	64453.4	42080.5	54937.4	35345.2	58607.7	47925.5	27610.8
chr12	76767941	76768341	Wdr89	chr12	-	76731580	76770524	51601	60667.9	54647.4	97231.4	51468.6	85256.2	61911.3	43252.6
chr12	76739391	76739765	Wdr89	chr12	-	76731580	76770524	51601	60667.9	54647.4	97231.4	51468.6	85256.2	61911.3	43252.6
chr12	105706841	105707134	Gsc	chr12	-	105709418	105711446	1653	1595.72	648.711	473.892	446.32	738.385	1011.05	507.64
chr9	15108856	15109179	4931406C07Rik	chr9	-	15087780	15110892	75766	106006	52436	72003.6	61064.3	100882	55471.1	43914.8
chr9	15120419	15120836	4931406C07Rik	chr9	-	15087780	15110892	75766	106006	52436	72003.6	61064.3	100882	55471.1	43914.8
chr7	148501962	148502279	Deaf1	chr7	-	148483074	148524682	98429	138530	89007.4	128537	77211.6	127438	93256.8	65733.6
chr7	148483650	148484245	Deaf1	chr7	-	148483074	148524682	98429	138530	89007.4	128537	77211.6	127438	93256.8	65733.6
chr19	12562357	12562758	Dtx4	chr19	-	12540825	12576486	46109	33181	45220.3	86753.3	46142.1	76091.7	51850.1	40355.4
chr19	12576402	12577067	Dtx4	chr19	-	12540825	12576486	46109	33181	45220.3	86753.3	46142.1	76091.7	51850.1	40355.4
chr19	12550295	12550727	Dtx4	chr19	-	12540825	12576486	46109	33181	45220.3	86753.3	46142.1	76091.7	51850.1	40355.4
chr11	120366864	120367250	Slc25a10	chr11	+	120353150	120362475	198316	43294.8	71769.7	115673	85228.7	140311	75186.8	80384.1
chr11	120352574	120352785	Slc25a10	chr11	+	120353150	120362475	198316	43294.8	71769.7	115673	85228.7	140311	75186.8	80384.1
chr7	53212694	53213051	Ccdc114	chr7	+	53183767	53204326	14161	11780.4	9347.72	7096.07	6244.95	10280.5	9805.75	9845.95
chr5	137943013	137943465	Pop7	chr5	-	137942666	137943657	11637	10123.6	8270.39	11509.1	6761.86	11129.3	7905.9	4812.83
chr10	127188520	127188746	Gpr182	chr10	-	127186657	127188854	27695	33052.4	19101	27861.7	17460.8	28727.4	18788.6	10050.2
chr10	127186247	127186647	Gpr182	chr10	-	127186657	127188854	27695	33052.4	19101	27861.7	17460.8	28727.4	18788.6	10050.2
chr2	84901470	84901802	Tnks1bp1	chr2	+	84890616	84913205	116999	121226	51259	67324.8	37869.2	62218.3	49136.3	45142.3
chr17	24349981	24350476	Ntn3	chr17	-	24340790	24346332	56379	42572.1	35915.9	58093.3	35737.1	58643.9	40638.8	25011
chr17	32076278	32076659	Sik1	chr17	-	31981194	31992737	62011	280159	70717.6	116198	91624.7	150232	58755.8	49761.1
chr17	31988671	31989490	Sik1	chr17	-	31981194	31992737	62011	280159	70717.6	116198	91624.7	150232	58755.8	49761.1
chr17	32045904	32046342	Sik1	chr17	-	31981194	31992737	62011	280159	70717.6	116198	91624.7	150232	58755.8	49761.1
chr17	32040943	32041219	Sik1	chr17	-	31981194	31992737	62011	280159	70717.6	116198	91624.7	150232	58755.8	49761.1
chr17	32038283	32038922	Sik1	chr17	-	31981194	31992737	62011	280159	70717.6	116198	91624.7	150232	58755.8	49761.1
chr11	97781794	97782207	Fbxo47	chr11	-	97715620	97745468	20025	6989.08	13824.7	12718.3	12881.8	21111.7	15207.7	14392.4
chr17	46862862	46863513	Gnmt	chr17	-	46862612	46866114	210921	407760	178505	231668	226208	370669	183762	156325
chr2	121185907	121186241	Ckmt1	chr2	+	121184376	121189473	3069	1217.44	2491.19	1019.74	682.402	1117.95	2512.58	2741.35
chr16	78309375	78309956	Cxadr	chr16	+	78301935	78360030	56956	54177.5	79123.3	71312.6	69446.1	113708	76613.2	69790.9
chr16	78308033	78308499	Cxadr	chr16	+	78301935	78360030	56956	54177.5	79123.3	71312.6	69446.1	113708	76613.2	69790.9
chr16	78305951	78306292	Cxadr	chr16	+	78301935	78360030	56956	54177.5	79123.3	71312.6	69446.1	113708	76613.2	69790.9
chr13	42463314	42463908	Edn1	chr13	+	42396638	42403358	1417	846.737	3186.87	2308.88	2144.43	3507.11	2382.94	3453.06
chr13	42532013	42532291	Edn1	chr13	+	42396638	42403358	1417	846.737	3186.87	2308.88	2144.43	3507.11	2382.94	3453.06
chr11	20836745	20836893	1110067D22Rik	chr11	-	20723357	20731111	5043	7781.46	4906.41	11080.7	4481.83	7328.7	4656.55	3666.86
chr7	130596016	130596357	Aqp8	chr7	+	130605807	130611517	4485	3748.28	4381.24	6438.5	4402.09	7192.13	4408.82	6174.69
chr3	108718778	108719137	Prpf38b	chr3	-	108705724	108714622	21350	46058.2	25341.2	39218.5	23245.8	37978.5	30183.4	17781.6
chr16	14303809	14304157	0610037P05Rik	chr16	-	14299336	14317425	15849	19595.1	18725.4	20780.1	18885	30842.3	21573.9	15584.5
chr11	50229080	50229455	Rufy1	chr11	-	50202804	50244613	59339	66306.1	50469.1	62671.2	40934.6	66836.8	47930.6	44281.2
chr11	50322323	50322632	Rufy1	chr11	-	50202804	50244613	59339	66306.1	50469.1	62671.2	40934.6	66836.8	47930.6	44281.2
chr19	4716246	4716605	Spnb3	chr19	+	4711222	4752352	218235	83014.6	94771.4	139546	91831.9	149919	106095	90765.2
chr2	147796855	147797499	Foxa2	chr2	-	147868613	147872705	112735	69058.3	46693.7	76848.4	49166.5	80211.6	65362.2	20989.5
chr2	147734889	147735147	Foxa2	chr2	-	147868613	147872705	112735	69058.3	46693.7	76848.4	49166.5	80211.6	65362.2	20989.5
chr2	147753909	147754474	Foxa2	chr2	-	147868613	147872705	112735	69058.3	46693.7	76848.4	49166.5	80211.6	65362.2	20989.5
chr2	147787406	147787709	Foxa2	chr2	-	147868613	147872705	112735	69058.3	46693.7	76848.4	49166.5	80211.6	65362.2	20989.5
chr2	147850032	147850328	Foxa2	chr2	-	147868613	147872705	112735	69058.3	46693.7	76848.4	49166.5	80211.6	65362.2	20989.5
chr2	147851322	147851723	Foxa2	chr2	-	147868613	147872705	112735	69058.3	46693.7	76848.4	49166.5	80211.6	65362.2	20989.5
chr2	147730799	147731266	Foxa2	chr2	-	147868613	147872705	112735	69058.3	46693.7	76848.4	49166.5	80211.6	65362.2	20989.5
chr2	147820751	147821025	Foxa2	chr2	-	147868613	147872705	112735	69058.3	46693.7	76848.4	49166.5	80211.6	65362.2	20989.5
chr2	147757438	147758093	Foxa2	chr2	-	147868613	147872705	112735	69058.3	46693.7	76848.4	49166.5	80211.6	65362.2	20989.5
chr2	147872495	147872994	Foxa2	chr2	-	147868613	147872705	112735	69058.3	46693.7	76848.4	49166.5	80211.6	65362.2	20989.5
chr2	147769982	147770291	Foxa2	chr2	-	147868613	147872705	112735	69058.3	46693.7	76848.4	49166.5	80211.6	65362.2	20989.5
chr2	148028331	148028591	Foxa2	chr2	-	147868613	147872705	112735	69058.3	46693.7	76848.4	49166.5	80211.6	65362.2	20989.5
chr2	147768284	147768978	Foxa2	chr2	-	147868613	147872705	112735	69058.3	46693.7	76848.4	49166.5	80211.6	65362.2	20989.5
chr11	77329710	77329917	Abhd15	chr11	+	77328618	77334130	25763	12611.8	10057.4	18036.6	10373.6	16922.3	9076.29	10556
chrX	103379469	103380008	Pgk1	chrX	+	103382462	103399038	8497	14776.3	15261.9	20622.8	11505.9	18762.9	8994.68	14153.6
chr19	32647691	32648009	Papss2	chr19	+	32694494	32741677	82601	18231.3	51118.1	48939.5	60671.6	98921.7	48805.9	71286.6
chr19	32706780	32707410	Papss2	chr19	+	32694494	32741677	82601	18231.3	51118.1	48939.5	60671.6	98921.7	48805.9	71286.6
chr19	32626090	32626456	Papss2	chr19	+	32694494	32741677	82601	18231.3	51118.1	48939.5	60671.6	98921.7	48805.9	71286.6
chr19	32617632	32618067	Papss2	chr19	+	32694494	32741677	82601	18231.3	51118.1	48939.5	60671.6	98921.7	48805.9	71286.6
chr19	32711939	32712168	Papss2	chr19	+	32694494	32741677	82601	18231.3	51118.1	48939.5	60671.6	98921.7	48805.9	71286.6
chr19	32702909	32703219	Papss2	chr19	+	32694494	32741677	82601	18231.3	51118.1	48939.5	60671.6	98921.7	48805.9	71286.6
chr19	32624792	32625299	Papss2	chr19	+	32694494	32741677	82601	18231.3	51118.1	48939.5	60671.6	98921.7	48805.9	71286.6
chr19	32701696	32702097	Papss2	chr19	+	32694494	32741677	82601	18231.3	51118.1	48939.5	60671.6	98921.7	48805.9	71286.6
chr19	32701223	32701545	Papss2	chr19	+	32694494	32741677	82601	18231.3	51118.1	48939.5	60671.6	98921.7	48805.9	71286.6
chr19	32690502	32690948	Papss2	chr19	+	32694494	32741677	82601	18231.3	51118.1	48939.5	60671.6	98921.7	48805.9	71286.6
chr19	32620459	32620943	Papss2	chr19	+	32694494	32741677	82601	18231.3	51118.1	48939.5	60671.6	98921.7	48805.9	71286.6
chr2	119456796	119457062	Nusap1	chr2	+	119444033	119475896	5193	5055.51	14894.8	6965.32	9357.19	15246.5	17146.2	17850.3
chr5	143174866	143175243	Slc29a4	chr5	+	143178054	143198443	19265	19729.3	12040.3	11575.8	8158.88	13289.6	11498.3	10150
chr5	143191706	143191862	Slc29a4	chr5	+	143178054	143198443	19265	19729.3	12040.3	11575.8	8158.88	13289.6	11498.3	10150
chr5	143157257	143157790	Slc29a4	chr5	+	143178054	143198443	19265	19729.3	12040.3	11575.8	8158.88	13289.6	11498.3	10150
chr4	138531947	138532231	Tmco4	chr4	+	138528819	138615086	142953	147996	104567	111491	83167.9	135425	123263	94488.1
chr10	89193095	89193733	Actr6	chr10	-	89174717	89195040	26737	31299.2	25868.9	43914.9	25494	41493.3	26799.3	25789.7
chr5	140606064	140606529	Mad1l1	chr5	-	140484642	140797506	462245	740098	705275	562204	363944	591827	575574	362881
chr5	140682566	140683281	Mad1l1	chr5	-	140484642	140797506	462245	740098	705275	562204	363944	591827	575574	362881
chr5	140589322	140589669	Mad1l1	chr5	-	140484642	140797506	462245	740098	705275	562204	363944	591827	575574	362881
chr5	140666086	140666477	Mad1l1	chr5	-	140484642	140797506	462245	740098	705275	562204	363944	591827	575574	362881
chr19	10201228	10201739	Fads2	chr19	-	10138653	10175993	441984	177250	160316	172359	189711	308351	163809	159571
chr15	98661135	98661515	Prkag1	chr15	-	98643227	98661939	35268	36257.4	32429	34276.5	21239.5	34517	33319.3	26112.9
chr5	136383165	136383526	Ywhag	chr5	-	136384248	136410511	70908	135954	87205.9	134803	71934.9	116714	82742.1	64287.7
chr12	85741568	85742122	Entpd5	chr12	-	85714806	85749979	133997	44092.4	63761.4	106562	62553.9	101473	59987.6	73418.9
chr19	42124629	42125214	4933411K16Rik	chr19	+	42126717	42128118	5826	3757.84	4072.46	5680.76	3358.27	5447.66	4177.71	3259.63
chr4	150263976	150264482	Park7	chr4	-	150271241	150284030	82248	90224.8	54432.4	87351.7	45316	73463	55829.3	35188.3
chr5	125892479	125893073	Dhx37	chr5	-	125894773	125914418	38148	44262.4	29245	40320.3	26464.1	42876.2	27185.3	24835.5
chr5	125914213	125914908	Dhx37	chr5	-	125894773	125914418	38148	44262.4	29245	40320.3	26464.1	42876.2	27185.3	24835.5
chr9	65238000	65238495	Kbtbd13	chr9	-	65236490	65239459	2833	3237.42	2002.06	1496.97	966.912	1565.04	1585.95	2563.73
chr7	97145209	97145541	Eed	chr7	-	97103163	97129486	65689	60986.8	42347.3	56663	40202.4	64945.9	46510.3	33738.7
chr1	36839404	36839828	Zap70	chr1	+	36818705	36839661	93829	37672.1	50867	47455.4	47985.3	77422.3	44938	46628.1
chr2	132697346	132698057	Lrrn4	chr2	-	132694251	132706598	12981	14249.1	10175	15520.2	8659.99	13966.3	11715.7	9524
chr11	59219224	59219489	Prss38	chr11	-	59186170	59189155	3069	2624.22	1086.72	1905.33	808.734	1304.11	1182.22	810.459
chr5	92634771	92635019	U90926	chr5	-	92638920	92644434	1653	2093.44	2429.72	1424.73	866.899	1397.19	2349.72	3278.35
chr5	92633093	92633758	U90926	chr5	-	92638920	92644434	1653	2093.44	2429.72	1424.73	866.899	1397.19	2349.72	3278.35
chr3	88225894	88226400	Slc25a44	chr3	-	88214417	88229061	71450	72890.8	56608	64787.7	46922	75547	50602.5	52961.1
chr6	108608318	108608865	Bhlhe40	chr6	+	108610622	108616919	97888	62624.1	72814.9	73149	44513	71602.2	42813.9	70293.7
chr6	108615882	108616424	Bhlhe40	chr6	+	108610622	108616919	97888	62624.1	72814.9	73149	44513	71602.2	42813.9	70293.7
chr7	25337294	25337911	Xrcc1	chr7	+	25332168	25358457	28321	25232.5	24282.3	33270.1	22881.8	36805.4	26180	19487.1
chr13	3890623	3891549	Net1	chr13	-	3881808	3917466	52313	65568.7	65996.8	75236.3	57955.5	93204.5	74368.8	58190.5
chr13	3907401	3907796	Net1	chr13	-	3881808	3917466	52313	65568.7	65996.8	75236.3	57955.5	93204.5	74368.8	58190.5
chr11	22737333	22737644	B3gnt2	chr11	-	22734738	22760336	84535	111876	61798.7	87542.8	52759	84819	67764.3	51780.2
chr11	22643865	22644360	B3gnt2	chr11	-	22734738	22760336	84535	111876	61798.7	87542.8	52759	84819	67764.3	51780.2
chr3	97419137	97419480	Chd1l	chr3	-	97364670	97414113	73863	91239	49942.2	68651	46529.8	74786.3	54752.8	44847.4
chr3	97400764	97401260	Chd1l	chr3	-	97364670	97414113	73863	91239	49942.2	68651	46529.8	74786.3	54752.8	44847.4
chr3	97412286	97412822	Chd1l	chr3	-	97364670	97414113	73863	91239	49942.2	68651	46529.8	74786.3	54752.8	44847.4
chr16	90366409	90366791	Hunk	chr16	+	90386641	90499798	83223	47292.6	72558	51559.2	50147.6	80598	71945	84486.3
chr16	90418727	90419135	Hunk	chr16	+	90386641	90499798	83223	47292.6	72558	51559.2	50147.6	80598	71945	84486.3
chr16	90385199	90385672	Hunk	chr16	+	90386641	90499798	83223	47292.6	72558	51559.2	50147.6	80598	71945	84486.3
chr16	90412609	90412955	Hunk	chr16	+	90386641	90499798	83223	47292.6	72558	51559.2	50147.6	80598	71945	84486.3
chr2	130946089	130946456	Hspa12b	chr2	+	130953147	130971719	23129	21897	15465.6	13567.8	16090.9	25860.2	14001.2	14023.4
chr15	76054011	76054398	Plec	chr15	-	76001403	76061808	285306	573309	258794	344273	197168	316713	291154	125952
chr5	73040094	73040715	Nipal1	chr5	+	73039034	73062317	15425	5207.62	21833.9	14429.5	13606.1	21851	14993.6	32015.8
chr5	73044201	73044864	Nipal1	chr5	+	73039034	73062317	15425	5207.62	21833.9	14429.5	13606.1	21851	14993.6	32015.8
chr5	73056115	73056435	Nipal1	chr5	+	73039034	73062317	15425	5207.62	21833.9	14429.5	13606.1	21851	14993.6	32015.8
chr8	107182357	107182810	Fam96b	chr8	-	107163738	107165628	9766	15704.5	7112.58	10155.4	8138.61	13070.2	8073.46	5430.12
chr2	126723285	126723702	2010106G01Rik	chr2	-	126716130	126758971	63371	125788	84813.9	111742	69946.7	112266	80285.4	64202
chr8	108483217	108483587	Slc12a4	chr8	-	108467492	108489939	30409	61410.1	36132.7	41003.7	23882.7	38329.4	34468.8	21516.1
chr8	91757926	91758258	Sall1	chr8	-	91551142	91568061	118203	92859.6	80268.2	135513	60496.1	97002.5	89856.5	58535.4
chr8	92048946	92049420	Sall1	chr8	-	91551142	91568061	118203	92859.6	80268.2	135513	60496.1	97002.5	89856.5	58535.4
chr8	92039825	92040335	Sall1	chr8	-	91551142	91568061	118203	92859.6	80268.2	135513	60496.1	97002.5	89856.5	58535.4
chr8	91699629	91700045	Sall1	chr8	-	91551142	91568061	118203	92859.6	80268.2	135513	60496.1	97002.5	89856.5	58535.4
chr8	91930675	91931080	Sall1	chr8	-	91551142	91568061	118203	92859.6	80268.2	135513	60496.1	97002.5	89856.5	58535.4
chr8	91803798	91804323	Sall1	chr8	-	91551142	91568061	118203	92859.6	80268.2	135513	60496.1	97002.5	89856.5	58535.4
chr8	91889231	91889735	Sall1	chr8	-	91551142	91568061	118203	92859.6	80268.2	135513	60496.1	97002.5	89856.5	58535.4
chr8	91803072	91803447	Sall1	chr8	-	91551142	91568061	118203	92859.6	80268.2	135513	60496.1	97002.5	89856.5	58535.4
chr8	91537073	91537420	Sall1	chr8	-	91551142	91568061	118203	92859.6	80268.2	135513	60496.1	97002.5	89856.5	58535.4
chr8	91968287	91968898	Sall1	chr8	-	91551142	91568061	118203	92859.6	80268.2	135513	60496.1	97002.5	89856.5	58535.4
chr8	91647540	91648137	Sall1	chr8	-	91551142	91568061	118203	92859.6	80268.2	135513	60496.1	97002.5	89856.5	58535.4
chr8	91621283	91621665	Sall1	chr8	-	91551142	91568061	118203	92859.6	80268.2	135513	60496.1	97002.5	89856.5	58535.4
chr4	132995036	132995437	Fam46b	chr4	+	133036047	133043855	9413	9090.68	5190.16	4583.29	4029.14	6455.89	4759.11	5204.25
chr13	36715410	36715940	Nrn1	chr13	-	36817494	36826323	51895	16231.3	20735.5	33595.8	18242	29224.4	28051.3	20965
chr13	36743773	36744234	Nrn1	chr13	-	36817494	36826323	51895	16231.3	20735.5	33595.8	18242	29224.4	28051.3	20965
chr13	36805774	36806302	Nrn1	chr13	-	36817494	36826323	51895	16231.3	20735.5	33595.8	18242	29224.4	28051.3	20965
chr13	36775536	36775975	Nrn1	chr13	-	36817494	36826323	51895	16231.3	20735.5	33595.8	18242	29224.4	28051.3	20965
chr13	36740296	36740679	Nrn1	chr13	-	36817494	36826323	51895	16231.3	20735.5	33595.8	18242	29224.4	28051.3	20965
chr13	36671107	36671517	Nrn1	chr13	-	36817494	36826323	51895	16231.3	20735.5	33595.8	18242	29224.4	28051.3	20965
chr13	36712868	36713310	Nrn1	chr13	-	36817494	36826323	51895	16231.3	20735.5	33595.8	18242	29224.4	28051.3	20965
chr13	36887656	36887859	Nrn1	chr13	-	36817494	36826323	51895	16231.3	20735.5	33595.8	18242	29224.4	28051.3	20965
chr11	48637165	48637534	Trim7	chr11	+	48639639	48663697	38354	38382.9	31112.4	48858.6	24555.4	39332.7	29179.4	29386.5
chr19	40261606	40262038	Cyp2c70	chr19	-	40227850	40261776	10567	106155	46534.8	27322.3	73975.4	118488	87182.8	26497.3
chr19	40231966	40232324	Cyp2c70	chr19	-	40227850	40261776	10567	106155	46534.8	27322.3	73975.4	118488	87182.8	26497.3
chr14	64557503	64557927	Sox7	chr14	+	64562542	64569569	10790	5540.49	4581.77	4119.78	3773.85	6044.28	4244.15	6235.83
chr6	47506043	47506315	Ezh2	chr6	-	47480272	47545029	22940	24881.7	35160.4	26305	37311.8	59718.9	44397.7	32474.6
chr17	74718498	74718657	Dpy30	chr17	-	74698813	74723284	47201	59304.9	33300.6	47257.7	28103.5	44980.4	29533.3	27345
chr7	26175152	26175434	Lipe	chr7	-	26164545	26181006	61967	46768.6	39577.8	52509.6	35359.7	56567.2	42010.7	36043.6
chr2	163879574	163880101	Tomm34	chr2	-	163879276	163896838	33729	61733	35494.2	42834.8	23578.7	37709.9	38441.1	27453.1
chr2	30748745	30749270	Ptges	chr2	-	30744990	30758817	14749	10199.6	7340.37	9164.61	7292.19	11643.1	7505.78	6180.09
chr11	100252384	100252876	Jup	chr11	-	100231932	100259053	95983	104362	71718.3	96607.5	62380	99567.1	75736.4	53759.7
chr15	78860100	78860522	Gcat	chr15	+	78861303	78872961	23826	14904.9	18152.2	35025.6	20781	33162.4	18669.1	14920.3
chr15	75337380	75337979	Ly6h	chr15	-	75395174	75397612	1653	3276.04	1034.69	996.385	548.964	875.715	407.62	1378.66
chr2	118335454	118335800	Srp14	chr2	-	118301578	118305432	21350	49143.3	20332.2	32734.8	18055.7	28790.3	20319	15066.7
chr11	114716357	114716637	Gprc5c	chr11	+	114712845	114733931	95506	46487.4	51047.1	61083.8	45791.6	73001	60000.6	46173
chr14	51629275	51629660	Rnase10	chr14	+	51627425	51630433	2361	1468.3	1624.08	1875.95	1147.2	1828.63	1022.97	2338.28
chr14	51627805	51628180	Rnase10	chr14	+	51627425	51630433	2361	1468.3	1624.08	1875.95	1147.2	1828.63	1022.97	2338.28
chr9	37161661	37162027	Ccdc15	chr9	-	37083419	37155977	18962	20695.3	27347.3	18913.8	27622.4	44019.8	31460.3	23778.5
chr2	30234543	30234988	Fam73b	chr2	+	30219854	30241039	81814	42274.7	54662.1	111552	57375.7	91356.7	48721.1	44326.2
chr10	43229136	43229528	Bend3	chr10	+	43198945	43235223	43405	41833.1	35610.3	45261.1	28441.7	45285.5	35007.5	36784.4
chr17	32557865	32558329	Pglyrp2	chr17	-	32550044	32557920	13871	12117.3	12438.8	12271.2	7928.59	12620.9	11231.1	12865
chr17	32566927	32567219	Pglyrp2	chr17	-	32550044	32557920	13871	12117.3	12438.8	12271.2	7928.59	12620.9	11231.1	12865
chr3	116317346	116317888	Ccdc76	chr3	-	116284253	116317505	24309	30224.9	28983.3	27023.7	25781.6	41034	29753.6	29819.1
chr4	118897175	118897677	AU022252	chr4	-	118897742	118905329	20758	33512.7	26473	44774.3	22306.7	35490.5	28023.5	17074.9
chr5	144992266	144992825	Tecpr1	chr5	-	144956217	144984447	46707	59969.1	47446.2	63684.9	34206.1	54420.3	48783.9	36020.3
chr9	21029682	21030123	Keap1	chr9	-	21034173	21043776	71161	70113.9	39756.1	66326	32655.1	51947.2	42291.3	26401.6
chr9	84973502	84973949	Fam46a	chr9	-	85214045	85220757	12967	9269.86	13921.2	14079.7	8409.7	13375.8	12118.4	14166.5
chr9	85213849	85214462	Fam46a	chr9	-	85214045	85220757	12967	9269.86	13921.2	14079.7	8409.7	13375.8	12118.4	14166.5
chr6	54670002	54670340	2410066E13Rik	chr6	+	54631765	54650400	14561	14175.4	11685.5	10533.7	8547.09	13592.1	11396.1	13200.7
chr11	101519386	101519849	Arl4d	chr11	+	101526854	101529146	46283	12137.6	11226.1	15726.8	9171.9	14579	15651.2	8820.19
chr3	108517677	108518040	Gpsm2	chr3	-	108481555	108525217	37937	19397.2	32199.8	29417.3	25832.7	41053.1	37185.5	32285.8
chr13	23809620	23810147	Hfe	chr13	-	23795709	23802680	36087	37600	18057.4	26878.1	15905.1	25270.1	20438.2	15528
chr17	23688942	23689540	Zfp213	chr17	-	23693733	23701193	85596	75320.1	50879.2	87234.2	39753.9	63160.6	59351	28696
chr17	23675619	23676009	Zfp213	chr17	-	23693733	23701193	85596	75320.1	50879.2	87234.2	39753.9	63160.6	59351	28696
chr17	23683322	23683708	Zfp213	chr17	-	23693733	23701193	85596	75320.1	50879.2	87234.2	39753.9	63160.6	59351	28696
chr17	23677772	23678240	Zfp213	chr17	-	23693733	23701193	85596	75320.1	50879.2	87234.2	39753.9	63160.6	59351	28696
chr17	23684225	23684513	Zfp213	chr17	-	23693733	23701193	85596	75320.1	50879.2	87234.2	39753.9	63160.6	59351	28696
chr17	23692208	23692653	Zfp213	chr17	-	23693733	23701193	85596	75320.1	50879.2	87234.2	39753.9	63160.6	59351	28696
chr17	23672074	23672570	Zfp213	chr17	-	23693733	23701193	85596	75320.1	50879.2	87234.2	39753.9	63160.6	59351	28696
chr17	23670705	23671117	Zfp213	chr17	-	23693733	23701193	85596	75320.1	50879.2	87234.2	39753.9	63160.6	59351	28696
chr5	110092568	110092955	Crlf2	chr5	-	109983727	109988012	12434	19274.6	10590.1	10958.2	9958.84	15821	11271.2	6282
chr6	72570977	72571476	Tgoln1	chr6	-	72558414	72566994	70591	124041	53251.3	83239.6	42318.2	67211	52295.8	36761.9
chr15	79571720	79572204	Sun2	chr15	-	79554499	79572960	145460	116440	60372.9	80891.5	44361.9	70449.4	65597.6	41338.7
chr14	55136398	55136724	Prmt5	chr14	-	55126018	55136307	15326	52303.3	26195.2	35347.8	23910.6	37957.9	24371.5	17914.8
chr6	83081762	83082419	Rtkn	chr6	+	83085801	83102573	72805	40911.3	52788.3	74636.6	42307.7	67158.4	64326.8	40590.8
chr9	64937454	64937716	Igdcc4	chr9	+	64949301	64985750	27849	22782.5	40493.7	38101.8	18123	28760.6	30833.7	34225
chr9	64969973	64970248	Igdcc4	chr9	+	64949301	64985750	27849	22782.5	40493.7	38101.8	18123	28760.6	30833.7	34225
chr11	118944232	118944589	Cbx4	chr11	-	118938884	118947551	92615	54780.4	43989.3	74923.1	38541.2	61143	54365.3	34407.2
chr13	60255601	60255868	Gas1	chr13	-	60275765	60278896	45856	11758.5	12015	21131.1	16982.1	26928.7	17185.9	12228.2
chr13	60274725	60275375	Gas1	chr13	-	60275765	60278896	45856	11758.5	12015	21131.1	16982.1	26928.7	17185.9	12228.2
chr13	60283685	60284117	Gas1	chr13	-	60275765	60278896	45856	11758.5	12015	21131.1	16982.1	26928.7	17185.9	12228.2
chr2	28407337	28407809	Ralgds	chr2	+	28368686	28408602	67733	85579.3	39898.1	43592.3	31544.5	50002.8	34455.4	35419.6
chr2	28405852	28406156	Ralgds	chr2	+	28368686	28408602	67733	85579.3	39898.1	43592.3	31544.5	50002.8	34455.4	35419.6
chr13	49283562	49284055	Ninj1	chr13	+	49282915	49291620	70287	113727	61995.5	122504	72990.3	115681	69989.9	41770.9
chr11	21875134	21875430	Otx1	chr11	-	21894766	21901654	705	4960.34	3616.75	3701.31	3959.4	6273.16	2995.76	3355.72
chr1	182139914	182140563	Adck3	chr1	-	182095368	182126151	97491	59675.6	60085	214349	104328	165258	73009.2	53454.4
chr1	182106986	182107294	Adck3	chr1	-	182095368	182126151	97491	59675.6	60085	214349	104328	165258	73009.2	53454.4
chr5	138161031	138161487	6430598A04Rik	chr5	-	138172190	138181226	20516	10360.5	5975.09	3678.92	3402.75	5388.91	5745.69	6073.61
chr5	138162530	138162950	6430598A04Rik	chr5	-	138172190	138181226	20516	10360.5	5975.09	3678.92	3402.75	5388.91	5745.69	6073.61
chr16	97815663	97816110	Tmprss2	chr16	-	97786288	97832802	26086	57048.4	36286.7	38023.5	33105.2	52423.7	39161.5	40121.2
chr5	115372159	115372710	Oasl1	chr5	+	115373248	115387920	23129	13968.8	15147.8	15351.2	11764.1	18624.8	15907.9	17691.4
chr5	115375750	115376104	Oasl1	chr5	+	115373248	115387920	23129	13968.8	15147.8	15351.2	11764.1	18624.8	15907.9	17691.4
chr2	30814237	30814658	Tor1b	chr2	+	30808520	30814535	33347	30786.4	25281.4	40676	21874.8	34609.7	20523	18158.9
chr5	128103007	128103372	Slc15a4	chr5	-	128076035	128097762	114832	114983	67411	78009.6	58580.8	92622.8	60083.3	81985.6
chr5	128091151	128091562	Slc15a4	chr5	-	128076035	128097762	114832	114983	67411	78009.6	58580.8	92622.8	60083.3	81985.6
chr5	147822758	147823102	Mtif3	chr5	-	147766097	147775350	27898	30354.3	28938.2	36824.2	27672.4	43751.6	29566.6	19709.2
chr5	89119874	89120342	Grsf1	chr5	-	89088261	89105196	45882	52103.4	28818	48143.5	21635.1	34205.3	30996.2	23821
chr15	79163932	79164429	Pla2g6	chr15	-	79116657	79158801	135508	109745	61736	94822.1	47269.4	74710.4	70461.9	40159.5
chr15	79157336	79157724	Pla2g6	chr15	-	79116657	79158801	135508	109745	61736	94822.1	47269.4	74710.4	70461.9	40159.5
chr15	79144239	79144584	Pla2g6	chr15	-	79116657	79158801	135508	109745	61736	94822.1	47269.4	74710.4	70461.9	40159.5
chr15	79152067	79152633	Pla2g6	chr15	-	79116657	79158801	135508	109745	61736	94822.1	47269.4	74710.4	70461.9	40159.5
chr6	116215552	116216096	Anubl1	chr6	+	116214252	116279644	35165	26621.8	41593.2	37622.6	43493.1	68724.7	46166.5	46839
chr10	60875710	60876171	Nodal	chr10	+	60880719	60888085	32119	12395.6	21566.2	35095.4	17909.6	28297.8	29255.6	13054.7
chr10	60888975	60889517	Nodal	chr10	+	60880719	60888085	32119	12395.6	21566.2	35095.4	17909.6	28297.8	29255.6	13054.7
chrX	160966885	160967258	Asb9	chrX	+	160935834	160977684	5429	3276.04	6289.51	3228.9	3712	5864.99	5347.37	8117.22
chr5	112773314	112773974	Hps4	chr5	+	112772114	112807444	64913	63201.1	47724.9	49107.6	35899	56678.2	45011.6	46002.1
chr1	183405910	183406444	Ccdc121	chr1	-	183439763	183441582	709	1030.3	461.947	378.062	557.65	880.293	510.178	123.708
chr1	183544070	183544506	Ccdc121	chr1	-	183439763	183441582	709	1030.3	461.947	378.062	557.65	880.293	510.178	123.708
chr17	9767494	9767845	Pabpc6	chr17	-	9859361	9862569	237	569.603	1642.82	962.916	1062.19	1676.43	1314.03	1998.86
chr7	87274147	87274445	Idh2	chr7	-	87239733	87260236	51413	33457.4	33457.9	62985.9	35931.6	56699.6	36264.6	24056
chr7	87275295	87275648	Idh2	chr7	-	87239733	87260236	51413	33457.4	33457.9	62985.9	35931.6	56699.6	36264.6	24056
chr4	140691072	140691486	D4Ertd22e	chr4	-	140668929	140695711	116234	82931.8	73881.2	102910	72767.6	114826	90570.4	70402.3
chr2	119488299	119489012	Ndufaf1	chr2	-	119481186	119488534	8235	11723.1	8985.99	8037.76	7593.81	11980.7	8699.28	9404.62
chr6	119410057	119410458	Wnt5b	chr6	-	119382548	119494365	126733	118004	90436.9	104919	79292.7	125033	88613.2	87524.1
chr2	155833506	155833949	6430550D23Rik	chr2	-	155826178	155833713	17198	7627.36	10182.1	14164.2	12011.7	18940.3	7760.37	12325.9
chr9	114833479	114833985	Gpd1l	chr9	-	114808456	114843105	77043	93785	52080	100155	46113.2	72702.7	61460.6	46417.6
chr9	114834888	114835451	Gpd1l	chr9	-	114808456	114843105	77043	93785	52080	100155	46113.2	72702.7	61460.6	46417.6
chr10	114796315	114796627	Tmem19	chr10	-	114777795	114799318	32100	73961.1	68655	68872	51467.3	81101.6	70706.7	51237.3
chr11	78206273	78206508	Gm11194	chr11	+	78207986	78219159	9677	8219.06	8362.4	7706.68	5258.25	8285.05	7604.01	9375.09
chr6	128581036	128581464	Klrb1a	chr6	-	128559244	128572952	237	434.221	1837.06	849.75	1632.79	2571.36	934.493	3157.72
chr3	93383254	93383564	S100a10	chr3	+	93359038	93368567	10237	21728.9	13681.2	31726.2	15055.8	23709.5	9831.03	10978.6
chr13	75936002	75936791	Glrx	chr13	+	75977333	75987599	15671	9146.82	8134.35	10152.8	7066.37	11124.7	7174.64	8592.25
chr13	75917558	75918002	Glrx	chr13	+	75977333	75987599	15671	9146.82	8134.35	10152.8	7066.37	11124.7	7174.64	8592.25
chr17	24985606	24986117	Fahd1	chr17	-	24985840	24987247	58521	62758.7	42075.5	79030.3	42457.2	66829.6	53900.2	29655.7
chr17	34880842	34881160	Cyp21a1	chr17	-	34938292	34941371	709	2606.7	631.673	776.553	961.385	1513.16	987.217	359.142
chr17	34945384	34946108	Cyp21a1	chr17	-	34938292	34941371	709	2606.7	631.673	776.553	961.385	1513.16	987.217	359.142
chr9	50409500	50409893	Sdhd	chr9	-	50404444	50411954	24453	40928.8	24306.5	31911.3	27090.2	42633.2	22175.9	22104.7
chr9	50402774	50403138	Sdhd	chr9	-	50404444	50411954	24453	40928.8	24306.5	31911.3	27090.2	42633.2	22175.9	22104.7
chr4	3639608	3639921	6330407A03Rik	chr4	+	3642110	3643953	1303	346.223	841.897	676.629	355.519	559.475	849.63	768.863
chr7	129342756	129343159	Ern2	chr7	-	129313406	129329730	6137	8832.66	10436.2	6689.15	6931.09	10900.4	11361.8	8560.63
chr13	3829182	3829579	Calm4	chr13	+	3837002	3837917	86	88.5998	49.3621	109.833	98.9072	155.496	35.6675	48.4195
chr15	101116715	101117286	9430023L20Rik	chr15	+	101114731	101121365	32998	14967.8	16150	20265.8	18135.1	28507.6	16234	15849.9
chr14	118524017	118524402	Tgds	chr14	-	118511132	118531987	41104	74711.3	48383.7	51375.5	34106.4	53609.7	45291.9	41119.5
chr14	118523438	118523793	Tgds	chr14	-	118511132	118531987	41104	74711.3	48383.7	51375.5	34106.4	53609.7	45291.9	41119.5
chr5	113641488	113642043	Tmem211	chr5	+	113655928	113668283	8733	9265.88	5854.25	5317.42	3588.3	5639.92	4122.45	6820.67
chr5	113662351	113662650	Tmem211	chr5	+	113655928	113668283	8733	9265.88	5854.25	5317.42	3588.3	5639.92	4122.45	6820.67
chr6	87563063	87563406	Prokr1	chr6	-	87528585	87540695	9370	6224.17	8684.16	4629.27	5092.7	8000.47	8378.97	9568.09
chr15	77716368	77716759	Txn2	chr15	-	77745480	77759424	71019	112493	62241.3	91798.4	48203.4	75710.6	53840.6	39741.9
chr15	77742545	77742905	Txn2	chr15	-	77745480	77759424	71019	112493	62241.3	91798.4	48203.4	75710.6	53840.6	39741.9
chr15	77753260	77753634	Txn2	chr15	-	77745480	77759424	71019	112493	62241.3	91798.4	48203.4	75710.6	53840.6	39741.9
chr15	77737928	77738402	Txn2	chr15	-	77745480	77759424	71019	112493	62241.3	91798.4	48203.4	75710.6	53840.6	39741.9
chr10	43799289	43799751	Aim1	chr10	-	43670112	43724652	71745	94575.4	60072.1	55909.4	43621.5	68508.8	60550.6	58888.1
chr10	43726001	43726523	Aim1	chr10	-	43670112	43724652	71745	94575.4	60072.1	55909.4	43621.5	68508.8	60550.6	58888.1
chr3	88752796	88753063	Dap3	chr3	-	88724724	88754204	50017	63128.6	39010.5	47087.9	30614.4	48057.3	36902	33896.8
chr7	117983889	117984188	Rnf141	chr7	-	117960048	117987895	38712	23660.5	27998.6	31464.5	23884.3	37487.1	30261.4	27129.5
chr8	95594757	95595330	Ces1b	chr8	-	95580625	95603916	14319	6606.82	20810.8	11720.7	20836.5	32703.1	24760.8	31246.3
chr8	95599217	95599499	Ces1b	chr8	-	95580625	95603916	14319	6606.82	20810.8	11720.7	20836.5	32703.1	24760.8	31246.3
chr8	95603641	95604053	Ces1b	chr8	-	95580625	95603916	14319	6606.82	20810.8	11720.7	20836.5	32703.1	24760.8	31246.3
chr5	43608656	43609280	Gm7854	chr5	-	43542924	43626593	220683	289297	119858	216485	102147	160278	153360	81582.1
chr5	43541633	43541956	Gm7854	chr5	-	43542924	43626593	220683	289297	119858	216485	102147	160278	153360	81582.1
chr11	72988981	72989586	Tmem93	chr11	-	72989004	72990544	24771	37119	17630	26867	14090.7	22101.2	17111.9	10190
chr4	154427038	154427451	Pex10	chr4	+	154441138	154446515	37399	38030.5	41060.7	68620.9	38151.9	59828.4	40277.7	22076
chr19	3214926	3215262	Ighmbp2	chr19	-	3259075	3283010	27421	59094.2	36254.7	51391.9	32243.8	50513.6	34591.9	25825.9
chr12	56596323	56596638	Nfkbia	chr12	-	56590395	56593634	107845	210201	68937.4	114292	59883.3	93741.7	84877.4	41769.7
chr12	56581481	56581886	Nfkbia	chr12	-	56590395	56593634	107845	210201	68937.4	114292	59883.3	93741.7	84877.4	41769.7
chr9	78375767	78376364	Eef1a1	chr9	-	78326260	78329531	199679	307557	120877	194763	90070.9	140803	112242	52939.5
chr9	78361594	78362046	Eef1a1	chr9	-	78326260	78329531	199679	307557	120877	194763	90070.9	140803	112242	52939.5
chr1	197105299	197105599	Tuba4a	chr1	-	75211548	75215828	76336	85620.7	58260.5	94225.2	58505.8	91445.2	61330.3	43911
chr15	75691963	75692428	Gsdmd	chr15	+	75692768	75697834	8481	11686	7183.88	10530.1	6911.61	10802.8	7336.78	4920.98
chr9	45010091	45010593	Tmprss4	chr9	-	44980808	45012158	29737	46572.3	24132.4	20560.5	21779.6	34040.9	20707.6	25833.8
chr7	87562406	87562963	Furin	chr7	-	87534079	87550317	411864	282649	181715	228347	124202	193894	186512	144665
chr7	87596607	87597020	Furin	chr7	-	87534079	87550317	411864	282649	181715	228347	124202	193894	186512	144665
chr14	62228623	62228773	Kcnrg	chr14	+	62226293	62231670	5883	1928.2	5358.18	3870.82	4718.7	7364.56	5175.84	8261.98
chr5	90854200	90854587	Alb	chr5	+	90889914	90905629	739033	290428	851788	847997	1.11309e+06	1.73709e+06	1.15751e+06	883868
chr5	90868107	90868643	Alb	chr5	+	90889914	90905629	739033	290428	851788	847997	1.11309e+06	1.73709e+06	1.15751e+06	883868
chr5	90896231	90896840	Alb	chr5	+	90889914	90905629	739033	290428	851788	847997	1.11309e+06	1.73709e+06	1.15751e+06	883868
chr5	90860099	90860542	Alb	chr5	+	90889914	90905629	739033	290428	851788	847997	1.11309e+06	1.73709e+06	1.15751e+06	883868
chr5	90876532	90876942	Alb	chr5	+	90889914	90905629	739033	290428	851788	847997	1.11309e+06	1.73709e+06	1.15751e+06	883868
chr5	90878989	90879348	Alb	chr5	+	90889914	90905629	739033	290428	851788	847997	1.11309e+06	1.73709e+06	1.15751e+06	883868
chr5	90891962	90892584	Alb	chr5	+	90889914	90905629	739033	290428	851788	847997	1.11309e+06	1.73709e+06	1.15751e+06	883868
chr17	35939985	35940409	Ier3	chr17	+	35958657	35959856	1691	7770.71	4345.46	3751.39	996.126	1554.35	1801.18	1925.65
chr5	138032533	138032884	Mospd3	chr5	-	138037874	138042268	24183	20528	16847.8	31361.4	15220.3	23747.6	15370.2	12489
chr5	138039963	138040291	Mospd3	chr5	-	138037874	138042268	24183	20528	16847.8	31361.4	15220.3	23747.6	15370.2	12489
chr15	38939317	38939907	Slc25a32	chr15	-	38925736	38944262	31379	70569	30675.5	43442.8	24075.6	37542	28730.2	23457.4
chr8	86109047	86109633	Tecr	chr8	-	86095596	86118390	92516	66901	59121.3	107504	63758	99406.1	59877.8	46641.8
chr8	23247161	23247488	Nek3	chr8	-	23238754	23276907	22876	17223.9	24949.7	23587.8	19309.2	30105.2	25882.4	29037.1
chr11	68876126	68876799	2310047M10Rik	chr11	+	68873276	68875078	3613	4050.9	2457.24	4109.19	2198.38	3427.38	2102.71	1698.12
chr18	74397419	74397583	Cxxc1	chr18	+	74375865	74381145	15923	27161.3	13259.3	21506.5	11399.8	17772.6	14285.1	7986.61
chr5	110425095	110425593	Zfp932	chr5	+	110425545	110439430	1	188.145	668.108	397.083	717.407	1117.95	425.315	919.025
chr14	73579067	73579635	Rcbtb2	chr14	+	73542316	73583861	68117	89542.8	57620.7	84491.4	45555.7	70976.9	53159.9	52569.3
chr8	107935605	107935867	Kctd19	chr8	-	107906711	107937387	13453	9142.84	11510.3	8714.83	8261.52	12864.2	9346.41	14701
chr11	95468740	95469208	Ngfr	chr11	-	95430139	95449012	18835	23660.1	14443.4	14649.1	14043.3	21840.7	14654.5	13110.4
chr11	72248090	72248418	Ggt6	chr11	+	72249027	72251906	8275	18188.7	5668.93	7144.94	7179.54	11164	7765.07	3565.37
chr1	72283440	72283927	Mreg	chr1	-	72205806	72258881	57601	40908.5	43925.8	70680.1	35416	55069.5	50635	44308.3
chr1	72272724	72273112	Mreg	chr1	-	72205806	72258881	57601	40908.5	43925.8	70680.1	35416	55069.5	50635	44308.3
chr1	72290704	72291241	Mreg	chr1	-	72205806	72258881	57601	40908.5	43925.8	70680.1	35416	55069.5	50635	44308.3
chr1	72245252	72245606	Mreg	chr1	-	72205806	72258881	57601	40908.5	43925.8	70680.1	35416	55069.5	50635	44308.3
chr8	126497345	126497785	Abcb10	chr8	-	126476358	126507022	57618	75558.6	55786.9	87686.1	51043.5	79350.6	60906.7	49138.4
chr8	126485266	126485617	Abcb10	chr8	-	126476358	126507022	57618	75558.6	55786.9	87686.1	51043.5	79350.6	60906.7	49138.4
chr8	87187198	87187615	Ier2	chr8	-	87185229	87186751	161935	130842	58755.8	69604.3	49436.2	76839.4	62228.7	45326.6
chr7	135592726	135592982	Tial1	chr7	-	135583290	135605027	31089	41646	28731.6	34638.9	25544.5	39679.1	30838.1	23474.1
chr17	46884748	46885241	Cnpy3	chr17	-	46872661	46889161	47961	58317.4	44941.4	95434.4	34015.1	52831.1	38498.8	26691.5
chr17	46872151	46872549	Cnpy3	chr17	-	46872661	46889161	47961	58317.4	44941.4	95434.4	34015.1	52831.1	38498.8	26691.5
chr17	46872721	46873222	Cnpy3	chr17	-	46872661	46889161	47961	58317.4	44941.4	95434.4	34015.1	52831.1	38498.8	26691.5
chr6	90464742	90465391	Aldh1l1	chr6	+	90500841	90549165	333708	956473	355477	463372	447061	694076	433479	310907
chr6	90494373	90494972	Aldh1l1	chr6	+	90500841	90549165	333708	956473	355477	463372	447061	694076	433479	310907
chr6	90459130	90459511	Aldh1l1	chr6	+	90500841	90549165	333708	956473	355477	463372	447061	694076	433479	310907
chr2	132178486	132178955	Prokr2	chr2	-	132196064	132211183	4595	5337.82	6660.29	4653.83	4398.93	6824.01	5437.29	9571
chr5	100931303	100931704	Lin54	chr5	-	100871057	100929658	17465	17544.1	32133.6	26939.7	29075.5	45095.6	35396.5	33155.5
chr18	66008467	66008729	Grp	chr18	+	66033147	66046233	7081	5804.89	4892.78	3159.79	3040.33	4715.23	4699.16	5884.35
chr6	125465907	125466412	Cd9	chr6	-	125410283	125444773	30751	48385.6	39999.5	49990.8	29731.6	46105.3	40837.1	30273.8
chr19	47127844	47128459	Pcgf6	chr19	-	47108108	47125335	15025	30115	20600.6	31194.3	16719.4	25919	24532.2	15917.3
chr4	120598620	120598780	Dem1	chr4	-	120593806	120597610	6580	6785.61	5359.75	4981.78	5033.48	7799.43	6136.78	5496.25
chr8	81344487	81344825	Lsm6	chr8	-	81328766	81345051	29265	21798.2	19780.2	20612.3	15123.7	23431.4	20401.4	19383.1
chr8	81336791	81337320	Lsm6	chr8	-	81328766	81345051	29265	21798.2	19780.2	20612.3	15123.7	23431.4	20401.4	19383.1
chr2	172277379	172278158	Gcnt7	chr2	-	172275812	172284096	7789	19067.1	13175.4	40609.3	10898.2	16881.9	13738.3	10168.3
chr11	3029141	3031863	Mtfp1	chr11	-	3991483	3995434	26108	25231.7	20476	33600.2	29092.9	45047.9	29936	15616.6
chr12	70797824	70798200	L2hgdh	chr12	-	70791422	70825861	47117	49268.7	35274	58855.1	33004.7	51063.7	35197.5	28862.4
chr4	106975319	106975845	Dio1	chr4	-	106964069	106979748	120921	37123.8	61018.9	103228	45686.5	70677.5	44142.4	74374.3
chr4	132842406	132842957	Tmem222	chr4	-	132821959	132833705	37387	40742.1	23308.2	28081.7	16580.5	25647.4	22872.9	15614.1
chr17	24661828	24662242	Traf7	chr17	-	24645794	24664883	50474	47961.5	33061.9	43291.1	25077.1	38750.9	32375	24975.7
chr14	47323890	47324181	Cdkn3	chr14	+	47380215	47391200	8805	2518.7	6670.77	6977.84	5876.75	9075.46	7179.69	4998.35
chrX	165815505	165815790	Hccs	chrX	-	165749462	165758275	6864	13263.2	6772.74	8547.01	6474.19	9993.66	8224.05	4782.88
chr11	102077633	102078139	Hdac5	chr11	-	102057060	102091486	118243	112250	68314.3	121575	70931.9	109469	83915.7	51798.5
chr13	67552846	67553369	Zfp874a	chr13	-	67541366	67552560	10311	6781.62	10570.5	8887.47	8994.25	13877.4	10047.7	10868
chr13	67552345	67552650	Zfp874a	chr13	-	67541366	67552560	10311	6781.62	10570.5	8887.47	8994.25	13877.4	10047.7	10868
chr12	119096287	119096709	Cdca7l	chr12	+	119082333	119117179	1889	10188.9	13715	7975.39	11914.4	18375.7	11456.1	19020.8
chr11	75257251	75257677	Wdr81	chr11	-	75254444	75268219	89425	71098.6	52830.6	92168.7	51835	79907.6	63138	39141.6
chr5	122741855	122742485	Pptc7	chr5	+	122734406	122774290	107413	102001	72633.5	69943.3	73702.5	113612	60474.8	66727.7
chr5	122756665	122757086	Pptc7	chr5	+	122734406	122774290	107413	102001	72633.5	69943.3	73702.5	113612	60474.8	66727.7
chr5	122724684	122725115	Pptc7	chr5	+	122734406	122774290	107413	102001	72633.5	69943.3	73702.5	113612	60474.8	66727.7
chr5	122740116	122740509	Pptc7	chr5	+	122734406	122774290	107413	102001	72633.5	69943.3	73702.5	113612	60474.8	66727.7
chr5	122760540	122760798	Pptc7	chr5	+	122734406	122774290	107413	102001	72633.5	69943.3	73702.5	113612	60474.8	66727.7
chr5	122770307	122770790	Pptc7	chr5	+	122734406	122774290	107413	102001	72633.5	69943.3	73702.5	113612	60474.8	66727.7
chr11	78236235	78236706	Slc13a2	chr11	-	78210777	78235687	19117	15898.4	16619.2	12651.3	10801.1	16628.6	16248.1	18850.2
chr15	31291343	31291708	Ankrd33b	chr15	-	31221234	31297514	103957	116620	91203.9	78730.1	98655.6	151818	89790.1	110000
chr15	31289511	31289906	Ankrd33b	chr15	-	31221234	31297514	103957	116620	91203.9	78730.1	98655.6	151818	89790.1	110000
chr15	31282414	31282817	Ankrd33b	chr15	-	31221234	31297514	103957	116620	91203.9	78730.1	98655.6	151818	89790.1	110000
chr15	31273413	31273983	Ankrd33b	chr15	-	31221234	31297514	103957	116620	91203.9	78730.1	98655.6	151818	89790.1	110000
chr8	11530792	11531266	Cars2	chr8	-	11514016	11550771	72212	71425.9	56855	113605	51590.7	79390.7	58718.6	36597.6
chr11	68908085	68908817	Per1	chr11	+	68912457	68923459	76512	105331	75131.4	122548	46882.5	72142.3	47279.1	33721.7
chr11	68924212	68924770	Per1	chr11	+	68912457	68923459	76512	105331	75131.4	122548	46882.5	72142.3	47279.1	33721.7
chr7	31749382	31749868	Lsr	chr7	-	31742788	31758488	392424	313346	331879	317457	164017	252304	312002	214956
chr4	135948709	135948972	Htr1d	chr4	+	135979438	136000317	12273	9250.35	9672.76	6394.91	5567.5	8564.28	8402.44	11368.4
chr4	135958682	135959030	Htr1d	chr4	+	135979438	136000317	12273	9250.35	9672.76	6394.91	5567.5	8564.28	8402.44	11368.4
chr17	29556849	29557374	Fgd2	chr17	+	29497858	29516480	29265	22889.2	17869.7	19954.4	14386.8	22122.6	19946.3	16745.1
chr17	29551131	29551650	Fgd2	chr17	+	29497858	29516480	29265	22889.2	17869.7	19954.4	14386.8	22122.6	19946.3	16745.1
chr9	108204219	108204641	Tcta	chr9	-	108205288	108208282	31230	65909.5	28008	53207.9	26634.9	40953.9	25500.4	17871.9
chr7	26002591	26003081	Dedd2	chr7	-	25987858	26004878	90435	76626.2	50320.5	66891.4	44866.7	68946.4	55001.6	46372.3
chr12	40676894	40677413	Arl4a	chr12	-	40759877	40764574	66394	155699	53244	114367	42768.5	65666.1	58827.7	27471.9
chr12	40679473	40680005	Arl4a	chr12	-	40759877	40764574	66394	155699	53244	114367	42768.5	65666.1	58827.7	27471.9
chr12	40762057	40762680	Arl4a	chr12	-	40759877	40764574	66394	155699	53244	114367	42768.5	65666.1	58827.7	27471.9
chr12	40761121	40761542	Arl4a	chr12	-	40759877	40764574	66394	155699	53244	114367	42768.5	65666.1	58827.7	27471.9
chr10	93335035	93335245	Metap2	chr10	-	93321234	93353947	35873	37998.2	35916.1	38022.1	33229.2	51001.1	38869.7	31773.3
chr18	66084895	66085277	Rax	chr18	-	66094292	66098743	3263	3396.69	2703.77	1900.51	1223.52	1877.46	2507.53	3096.58
chr19	46466768	46467214	Actr1a	chr19	-	46451303	46470225	44554	40302.1	35689.7	46095	31112.8	47739.6	35360	27030.5
chr3	110468481	110468861	Prmt6	chr3	-	110049027	110053916	30062	39457.6	22359.9	40733.5	20295.4	31121.9	25057.6	11255.6
chr11	101253904	101254356	Aarsd1	chr11	-	101268153	101278747	10321	16640.6	13066.5	16954.3	14726.8	22572.3	13985	10505.7
chr3	36515931	36516255	Bbs7	chr3	-	36472064	36512311	11047	10188.5	16342.7	13257.1	10584.2	16207.1	15645.4	16516.3
chr15	79217946	79218502	Tmem184b	chr15	-	79191113	79233733	146812	105408	70733.5	84817.9	60063.4	91969	65787.9	57438.5
chr15	79218587	79218991	Tmem184b	chr15	-	79191113	79233733	146812	105408	70733.5	84817.9	60063.4	91969	65787.9	57438.5
chr2	119884618	119885013	Pla2g4b	chr2	+	119859168	119868768	6356	14010.2	10446.7	9804.6	7260.08	11116	9056.79	6610.61
chr2	119878145	119878418	Pla2g4b	chr2	+	119859168	119868768	6356	14010.2	10446.7	9804.6	7260.08	11116	9056.79	6610.61
chr4	125928307	125928602	Mtap7d1	chr4	-	125909411	125933563	59167	155889	80117.3	123923	58392.9	89393.3	92610.8	48189.2
chr2	129038171	129038665	Slc20a1	chr2	+	129024508	129037348	18409	13367.9	28184.6	33915.8	16444.1	25172.8	14655.2	23795.2
chr6	72280182	72280449	Usp39	chr6	-	72268669	72295169	26884	41532.9	30427.3	40158.5	24592.3	37634.7	31659.6	28287.6
chr9	106344678	106344998	Abhd14a	chr9	-	106342381	106350009	16314	11985.9	13966	20137.4	15309	23407	16758	11187.8
chr11	53512035	53512719	Rad50	chr11	-	53463020	53520821	44349	21992.1	34283.7	32912.7	32851.8	50190.1	30677.4	39921.1
chr11	22872947	22873327	Zrsr1	chr11	+	22872028	22874908	11577	28454.2	19502.2	38714.1	22284.1	34033.3	19966.2	17606.5
chr12	86788295	86788880	Fos	chr12	+	86814850	86818219	3069	15010.8	6733.94	6013.52	4965.58	7583.52	8675.09	3173.53
chr11	20217856	20218234	Slc1a4	chr11	-	20202182	20232716	12654	23916.9	27331.6	27936.5	23053.1	35195.6	34392.6	26435.3
chr7	13857106	13857396	6330408A02Rik	chr7	-	13844315	13864070	28533	18719.9	21969.8	27153.5	22155.4	33821.2	23679.6	19181.8
chr14	38698234	38698833	Ghitm	chr14	-	37933631	37948508	18046	54218.5	27022.4	35786	22707	34647.1	28055.3	21878.9
chr14	37948293	37948806	Ghitm	chr14	-	37933631	37948508	18046	54218.5	27022.4	35786	22707	34647.1	28055.3	21878.9
chr14	38074422	38074644	Ghitm	chr14	-	37933631	37948508	18046	54218.5	27022.4	35786	22707	34647.1	28055.3	21878.9
chr14	37978233	37978778	Ghitm	chr14	-	37933631	37948508	18046	54218.5	27022.4	35786	22707	34647.1	28055.3	21878.9
chr14	38482808	38483120	Ghitm	chr14	-	37933631	37948508	18046	54218.5	27022.4	35786	22707	34647.1	28055.3	21878.9
chr8	35171519	35172070	Dctn6	chr8	-	35153476	35171565	25422	27206.3	22465.1	28276.5	18537.6	28280.7	20130.9	20841.5
chr5	135576799	135577271	Mlxipl	chr5	+	135582782	135613792	244314	80683.2	110637	123898	101669	155080	133980	99808.2
chr5	135580133	135580503	Mlxipl	chr5	+	135582782	135613792	244314	80683.2	110637	123898	101669	155080	133980	99808.2
chr5	135594492	135595021	Mlxipl	chr5	+	135582782	135613792	244314	80683.2	110637	123898	101669	155080	133980	99808.2
chr15	31184784	31185219	Dap	chr15	+	31154139	31204093	209458	569032	244781	280047	225366	343599	278883	185230
chr15	31165728	31166484	Dap	chr15	+	31154139	31204093	209458	569032	244781	280047	225366	343599	278883	185230
chr15	31212137	31212408	Dap	chr15	+	31154139	31204093	209458	569032	244781	280047	225366	343599	278883	185230
chr2	167327964	167328433	Rnf114	chr2	+	167318144	167341666	88029	136210	90769.7	138944	72515	110552	94911.5	66687.4
chr3	145655141	145655430	Syde2	chr3	+	145650833	145684684	54780	38355.4	26422.7	41293.6	28816.5	43930.2	27989.9	23894.6
chr3	145675925	145676290	Syde2	chr3	+	145650833	145684684	54780	38355.4	26422.7	41293.6	28816.5	43930.2	27989.9	23894.6
chr11	94223409	94223826	Abcc3	chr11	-	94204608	94254290	179048	52582	68625.6	127255	80208	122207	57876.5	86454.6
chr11	94226670	94227168	Abcc3	chr11	-	94204608	94254290	179048	52582	68625.6	127255	80208	122207	57876.5	86454.6
chr11	94209142	94209517	Abcc3	chr11	-	94204608	94254290	179048	52582	68625.6	127255	80208	122207	57876.5	86454.6
chr11	94250218	94250849	Abcc3	chr11	-	94204608	94254290	179048	52582	68625.6	127255	80208	122207	57876.5	86454.6
chr18	46694650	46695046	Fem1c	chr18	-	46664259	46685625	42204	86198.8	41871.4	75439.8	40136.4	61127.3	48450.2	33438.8
chr18	3193128	3193408	Fem1c	chr18	-	46664259	46685625	42204	86198.8	41871.4	75439.8	40136.4	61127.3	48450.2	33438.8
chr18	46683677	46684195	Fem1c	chr18	-	46664259	46685625	42204	86198.8	41871.4	75439.8	40136.4	61127.3	48450.2	33438.8
chr7	148211296	148211548	Ifitm6	chr7	-	148201710	148202791	1	955.042	227.738	571.167	186.55	284.052	209.727	374.117
chr10	127944540	127944802	Myl6b	chr10	-	127931212	127935741	10835	4691.97	8839.33	12640.5	7340.88	11175.5	9401.66	8383.44
chr13	38734285	38734969	Muted	chr13	-	38694574	38726978	33910	28279.4	33558.9	38028.8	29517.4	44916.7	35668	33021.6
chr13	38735080	38735482	Muted	chr13	-	38694574	38726978	33910	28279.4	33558.9	38028.8	29517.4	44916.7	35668	33021.6
chr2	38221722	38222159	Lhx2	chr2	+	38206827	38225248	15043	12710.1	9807.23	8793.57	5938.6	9029.68	8636.45	12126.7
chr15	99742190	99742530	1700030F18Rik	chr15	-	99748778	99762089	27613	13983.9	13808.8	7475.29	8655.52	13159.5	16655.8	15374.5
chr6	55125497	55126530	Inmt	chr6	-	55120620	55124984	250028	5268.54	21508.5	5187.64	29742.7	45219.2	17439.5	44499.2
chr6	55132925	55133477	Inmt	chr6	-	55120620	55124984	250028	5268.54	21508.5	5187.64	29742.7	45219.2	17439.5	44499.2
chr4	43537849	43538174	Tpm2	chr4	-	43527583	43536260	8842	8925.43	5506.15	5441.67	5744.62	8712.68	4537.38	6208.79
chr4	43534802	43535133	Tpm2	chr4	-	43527583	43536260	8842	8925.43	5506.15	5441.67	5744.62	8712.68	4537.38	6208.79
chr17	32519416	32519848	Wiz	chr17	-	32490994	32526384	31625	50675.5	34169.8	45161.2	33171.3	50285.1	35694	26965.2
chr5	93718549	93718857	Ccng2	chr5	+	93696598	93705257	8145	5442.94	6069.33	8090.01	6042.56	9159.76	6025.91	6751.21
chr2	151962950	151963380	Tcf15	chr2	+	151969344	151974832	1417	5200.05	2891.32	2620.93	3149.03	4772.07	2970.48	3343.24
chr4	132418023	132418367	Stx12	chr4	-	132409978	132440373	36042	60842.3	38679.8	45685.9	31675.8	47965.4	37352.7	32394.8
chr4	132419037	132419374	Stx12	chr4	-	132409978	132440373	36042	60842.3	38679.8	45685.9	31675.8	47965.4	37352.7	32394.8
chr4	138279970	138280319	Ubxn10	chr4	-	138274440	138281166	545	7341.47	4480.98	4523.09	3689.89	5581.55	3996.42	3757.54
chr3	89886705	89887208	Tpm3	chr3	+	89876615	89904526	48853	60065.4	50826.3	65354.7	50346.9	76139.8	49985.3	47301.9
chr7	52742430	52743029	Dhdh	chr7	-	52728932	52744166	67218	26144.8	46124.9	53065.6	45138.6	68199.4	47147.3	48379.3
chr7	4636510	4636962	Hspbp1	chr7	-	4612122	4636565	13405	20667.8	18656.8	16956.5	16004.9	24179.8	16339.5	19203.4
chr8	24304257	24304557	Agpat6	chr8	-	24283417	24318925	95726	109014	60636	83001.3	80739.4	121944	68471.4	69423.1
chr8	24298300	24298721	Agpat6	chr8	-	24283417	24318925	95726	109014	60636	83001.3	80739.4	121944	68471.4	69423.1
chr5	111064965	111065426	Noc4l	chr5	-	111077437	111082401	10886	21816.1	10784.2	13762.3	9618.01	14523.6	11778.2	6258.71
chr11	87799602	87799876	Dynll2	chr11	-	87793026	87811800	67588	73819.4	40617.9	83190.7	40153.5	60609.7	53960.5	29452.3
chr6	38287932	38288524	Zc3hav1	chr6	-	38260496	38304603	60423	48419.8	50838.8	61920.5	48102.6	72602.8	58063.2	48568.5
chr17	24599234	24599654	E4f1	chr17	-	24580723	24592256	74731	123576	61115.9	92021.6	56396.3	85108.6	73117.5	37495.7
chr11	119397804	119398089	Nptx1	chr11	-	119400032	119409134	11737	14583.6	7933.69	8972.71	8186.25	12351.2	8947.37	6554.46
chr3	107593269	107593632	Csf1	chr3	-	107543965	107563387	41806	60868.5	39641.8	54672.5	41439.9	62509.8	45494.8	37148.4
chr3	107569694	107570155	Csf1	chr3	-	107543965	107563387	41806	60868.5	39641.8	54672.5	41439.9	62509.8	45494.8	37148.4
chr2	50911656	50912148	Rnd3	chr2	-	50985958	51004631	104678	135240	98313.9	114983	82851.3	124976	122709	69177.3
chr2	51004381	51004907	Rnd3	chr2	-	50985958	51004631	104678	135240	98313.9	114983	82851.3	124976	122709	69177.3
chr2	50994801	50995249	Rnd3	chr2	-	50985958	51004631	104678	135240	98313.9	114983	82851.3	124976	122709	69177.3
chr2	50998232	50998624	Rnd3	chr2	-	50985958	51004631	104678	135240	98313.9	114983	82851.3	124976	122709	69177.3
chr11	98590285	98590734	Med24	chr11	-	98565904	98590749	33681	42967.9	32395.1	36488.3	29805.3	44946	35314.1	24231.1
chr10	68613555	68614291	Rhobtb1	chr10	+	68675404	68754532	219016	196114	110730	214042	120753	182032	100172	118886
chr10	68750882	68751220	Rhobtb1	chr10	+	68675404	68754532	219016	196114	110730	214042	120753	182032	100172	118886
chr13	56253097	56253366	H2afy	chr13	-	56174982	56236911	96761	137303	97050.7	119484	83857.4	126396	107248	68558.4
chr11	120067562	120068067	2810410L24Rik	chr11	-	120047963	120051170	29372	22340.2	13881	18117.5	11937.8	17991.6	14910.9	10457.8
chr9	83732187	83732548	Ttk	chr9	+	83728295	83765997	7081	3743.9	12194.4	4532.24	9722.76	14648	14029.8	14698.1
chr9	83754168	83754596	Ttk	chr9	+	83728295	83765997	7081	3743.9	12194.4	4532.24	9722.76	14648	14029.8	14698.1
chr2	32092670	32092982	Pomt1	chr2	+	32092202	32110525	39864	35797.1	33222.5	47435.6	35246.3	53081.7	34306.6	23466.2
chr13	86428444	86428885	Cox7c	chr13	-	86184402	86186400	19005	24838.7	11719	17138.3	11518	17341.6	11425.7	8657.14
chr13	87116402	87116669	Cox7c	chr13	-	86184402	86186400	19005	24838.7	11719	17138.3	11518	17341.6	11425.7	8657.14
chr13	86068527	86068982	Cox7c	chr13	-	86184402	86186400	19005	24838.7	11719	17138.3	11518	17341.6	11425.7	8657.14
chr13	87080155	87080568	Cox7c	chr13	-	86184402	86186400	19005	24838.7	11719	17138.3	11518	17341.6	11425.7	8657.14
chr13	87341103	87341426	Cox7c	chr13	-	86184402	86186400	19005	24838.7	11719	17138.3	11518	17341.6	11425.7	8657.14
chr4	134964550	134964848	A330049M08Rik	chr4	-	134925491	134954142	9205	19358.2	16347.6	11240.9	10639.2	16010.6	15785.5	18755.8
chr17	34399915	34400203	H2-Ab1	chr17	+	34400171	34406363	12330	5790.55	5132.1	5602.75	2907.95	4375.72	4005.45	4540.79
chr1	90120669	90121463	Heatr7b1	chr1	+	90123594	90158864	251135	160391	165566	187135	146606	220594	172640	182907
chr18	61839090	61839418	Il17b	chr18	+	61847588	61852191	6810	2808.18	2987.65	2290.34	1794.65	2700.3	3862.81	2396.1
chr9	43634190	43634587	Pvrl1	chr9	+	43552658	43615544	247348	194355	194021	326739	189561	285044	223994	136906
chr9	43444513	43445089	Pvrl1	chr9	+	43552658	43615544	247348	194355	194021	326739	189561	285044	223994	136906
chr9	43347706	43348044	Pvrl1	chr9	+	43552658	43615544	247348	194355	194021	326739	189561	285044	223994	136906
chr9	43348209	43348660	Pvrl1	chr9	+	43552658	43615544	247348	194355	194021	326739	189561	285044	223994	136906
chr9	43403589	43403926	Pvrl1	chr9	+	43552658	43615544	247348	194355	194021	326739	189561	285044	223994	136906
chr9	43442267	43442559	Pvrl1	chr9	+	43552658	43615544	247348	194355	194021	326739	189561	285044	223994	136906
chr9	43445681	43446218	Pvrl1	chr9	+	43552658	43615544	247348	194355	194021	326739	189561	285044	223994	136906
chr9	43626214	43626553	Pvrl1	chr9	+	43552658	43615544	247348	194355	194021	326739	189561	285044	223994	136906
chr9	88728024	88728545	Trim43c	chr9	+	88734001	88743028	473	188.145	412.012	510.25	372.1	559.475	340.452	305.483
chr4	122785164	122785626	Bmp8b	chr4	+	122782407	122803334	16049	17002.1	13292.8	15750.9	12740	19142.9	13049	11355.9
chr17	80291228	80291717	Atl2	chr17	-	80247731	80295463	99960	191362	90129	113784	78339.6	117700	83488.2	77132.1
chr17	80317635	80318072	Atl2	chr17	-	80247731	80295463	99960	191362	90129	113784	78339.6	117700	83488.2	77132.1
chr17	80374612	80374968	Atl2	chr17	-	80247731	80295463	99960	191362	90129	113784	78339.6	117700	83488.2	77132.1
chr17	80337584	80338079	Atl2	chr17	-	80247731	80295463	99960	191362	90129	113784	78339.6	117700	83488.2	77132.1
chr17	80237928	80238197	Atl2	chr17	-	80247731	80295463	99960	191362	90129	113784	78339.6	117700	83488.2	77132.1
chr17	3029584	3030148	Atl2	chr17	-	80247731	80295463	99960	191362	90129	113784	78339.6	117700	83488.2	77132.1
chr15	101077315	101077668	Nr4a1	chr15	+	101097276	101105225	3305	22673	8899.1	7405.47	7477.74	11234.6	9465.94	7177.98
chrX	107070934	107071310	Gm7134	chrX	+	107568091	107570495	1181	33.6508	583.049	114.167	186.55	280.238	459.26	812.955
chrX	131739586	131739960	Tceal6	chrX	-	131743224	131745226	1	350.603	181.735	101.887	186.55	280.238	129.197	203.989
chrX	131737364	131737693	Tceal6	chrX	-	131743224	131745226	1	350.603	181.735	101.887	186.55	280.238	129.197	203.989
chr7	29138366	29138705	Rps16	chr7	+	29135707	29137717	7143	4124.56	5934.99	7133.39	4775.55	7170	6412.67	3008.81
chr11	70052655	70053282	Rnasek	chr11	-	70051624	70053354	25916	43104.5	23454.6	33906.7	24383.8	36607.4	26530.6	18480.9
chr11	70356986	70357255	Pld2	chr11	+	70353665	70371612	26709	14059.6	15213.7	15710.5	11300.6	16960.1	13466.1	17216.8
chr3	106471395	106471663	4933421E11Rik	chr3	+	106487904	106539494	28321	34529.3	23295.1	23369.9	23132.9	34711.1	23847.5	21619.3
chr4	106205680	106206152	Dhcr24	chr4	+	106233642	106261718	186506	209486	258961	436105	211155	316767	263713	191443
chr4	106231966	106232571	Dhcr24	chr4	+	106233642	106261718	186506	209486	258961	436105	211155	316767	263713	191443
chr15	100288508	100288797	Letmd1	chr15	+	100299464	100309683	19117	14798.2	13932.6	20091.9	9887.78	14832.6	16006.9	10094.7
chr11	117237406	117237797	40057	chr11	+	117060974	117223639	352113	278631	275006	456314	287846	431762	276496	237958
chr11	117145163	117145498	40057	chr11	+	117060974	117223639	352113	278631	275006	456314	287846	431762	276496	237958
chr11	117251472	117251808	40057	chr11	+	117060974	117223639	352113	278631	275006	456314	287846	431762	276496	237958
chr11	117173500	117173791	40057	chr11	+	117060974	117223639	352113	278631	275006	456314	287846	431762	276496	237958
chr11	117094139	117094639	40057	chr11	+	117060974	117223639	352113	278631	275006	456314	287846	431762	276496	237958
chr15	78678768	78679177	Cdc42ep1	chr15	+	78673076	78681332	85701	77170.1	64172.9	94094.5	52488.5	78730	73079.3	33768.3
chr15	78676316	78676655	Cdc42ep1	chr15	+	78673076	78681332	85701	77170.1	64172.9	94094.5	52488.5	78730	73079.3	33768.3
chr15	78670629	78671008	Cdc42ep1	chr15	+	78673076	78681332	85701	77170.1	64172.9	94094.5	52488.5	78730	73079.3	33768.3
chr5	143090335	143090914	Mmd2	chr5	-	143039434	143084706	30845	21046.1	32096.8	27563.6	24342.8	36511.3	21556.9	50652.1
chr5	143073741	143074221	Mmd2	chr5	-	143039434	143084706	30845	21046.1	32096.8	27563.6	24342.8	36511.3	21556.9	50652.1
chr9	119957525	119957977	Cx3cr1	chr9	-	119957810	119977400	10149	8690.5	8882.85	7105.94	5717.78	8575.73	6916.43	11646.2
chr7	133832581	133832987	Slx1b	chr7	-	133832440	133839297	42075	33826.9	30167.5	50294.4	33489.7	50222.9	34750.4	26303.8
chr12	4219972	4220956	Cenpo	chr12	-	4211671	4234294	14219	23877.1	22743.2	21257.3	17897.2	26820.8	24115.5	20043.6
chr12	4221199	4221585	Cenpo	chr12	-	4211671	4234294	14219	23877.1	22743.2	21257.3	17897.2	26820.8	24115.5	20043.6
chr12	4219463	4219958	Cenpo	chr12	-	4211671	4234294	14219	23877.1	22743.2	21257.3	17897.2	26820.8	24115.5	20043.6
chr16	55825635	55826029	Nfkbiz	chr16	-	55811489	55838754	99258	289626	99035.1	146916	89743.7	134457	112835	67977.3
chr16	55816440	55817161	Nfkbiz	chr16	-	55811489	55838754	99258	289626	99035.1	146916	89743.7	134457	112835	67977.3
chr18	34783537	34783971	Kif20a	chr18	+	34784277	34792931	10829	6888.34	11527.8	7452.66	10823.7	16216.2	13964	9545.63
chr15	83354445	83354843	Bik	chr15	+	83357291	83375065	47028	22788.5	29309.5	43955.4	23815.9	35679.3	28240.2	24875
chr15	83360788	83361360	Bik	chr15	+	83357291	83375065	47028	22788.5	29309.5	43955.4	23815.9	35679.3	28240.2	24875
chr11	61456913	61457407	Grap	chr11	+	61466822	61486279	32097	21803.4	17602.4	16353.6	12123.6	18151.4	17121.7	16947.6
chr5	149552487	149552839	2210417A02Rik	chr5	+	149553415	149554715	1938	94.5725	495.63	288.251	62.85	94.0792	661.848	529.686
chr5	149558208	149558630	2210417A02Rik	chr5	+	149553415	149554715	1938	94.5725	495.63	288.251	62.85	94.0792	661.848	529.686
chr5	149559461	149560176	2210417A02Rik	chr5	+	149553415	149554715	1938	94.5725	495.63	288.251	62.85	94.0792	661.848	529.686
chr10	23643798	23644225	Taar1	chr10	+	23640211	23641210	2125	468.863	313.977	57.5833	62.85	94.0792	1	791.325
chr10	23642205	23642676	Taar1	chr10	+	23640211	23641210	2125	468.863	313.977	57.5833	62.85	94.0792	1	791.325
chr10	57690974	57691352	Dux	chr10	-	57693398	57695423	172	810.104	493.14	227.333	62.85	94.0792	563.985	609.966
chr14	66766185	66766750	Chrna2	chr14	+	66759796	66771785	12981	10484.3	10952.5	11318.9	9075.57	13580.3	8945.56	10896.3
chr14	66767446	66767765	Chrna2	chr14	+	66759796	66771785	12981	10484.3	10952.5	11318.9	9075.57	13580.3	8945.56	10896.3
chr5	112722633	112723115	Tpst2	chr5	+	112705726	112744376	138163	107703	112558	192906	117492	175701	147259	85812.4
chr5	112731149	112731716	Tpst2	chr5	+	112705726	112744376	138163	107703	112558	192906	117492	175701	147259	85812.4
chr10	116495427	116495760	Cct2	chr10	-	116488053	116500870	33608	36607.4	23757.4	31508.5	20212	30215.5	25282.6	17121.5
chr6	131327444	131327723	Csda	chr6	-	131314875	131338468	13327	22025.6	15662.2	15255.6	12945	19348.5	15474.6	17620.3
chr2	67821504	67822117	B3galt1	chr2	+	67955769	67960747	1181	20178.8	14542	13291.6	8656.84	12939	7996.54	7385.96
chr2	67794332	67794644	B3galt1	chr2	+	67955769	67960747	1181	20178.8	14542	13291.6	8656.84	12939	7996.54	7385.96
chr2	67805593	67805857	B3galt1	chr2	+	67955769	67960747	1181	20178.8	14542	13291.6	8656.84	12939	7996.54	7385.96
chr2	67809070	67809524	B3galt1	chr2	+	67955769	67960747	1181	20178.8	14542	13291.6	8656.84	12939	7996.54	7385.96
chr2	67719772	67720374	B3galt1	chr2	+	67955769	67960747	1181	20178.8	14542	13291.6	8656.84	12939	7996.54	7385.96
chr2	67740689	67741294	B3galt1	chr2	+	67955769	67960747	1181	20178.8	14542	13291.6	8656.84	12939	7996.54	7385.96
chr4	117853423	117853832	Kdm4a	chr4	-	117809608	117852648	99048	145223	106303	137964	77498.5	115751	105374	69751.3
chr4	117835494	117835813	Kdm4a	chr4	-	117809608	117852648	99048	145223	106303	137964	77498.5	115751	105374	69751.3
chrX	163671289	163671715	Tmsb4x	chrX	-	163645025	163647150	14671	26970.2	13576.7	19005.3	11181.4	16698	13953.9	10816.8
chrX	163589838	163590105	Tmsb4x	chrX	-	163645025	163647150	14671	26970.2	13576.7	19005.3	11181.4	16698	13953.9	10816.8
chr12	59688225	59688745	Clec14a	chr12	-	59365706	59370245	13577	11040.6	10917.9	15482	9107.95	13599.7	9389.02	8535.26
chr4	47076488	47077023	Anks6	chr4	-	47028560	47070178	27468	38437.8	28918.6	23993.8	19854.8	29629.9	27894.2	29664.8
chr19	24249836	24250200	Tjp2	chr19	-	24168991	24299516	113295	80603.6	94897.7	99900.2	87147.9	129899	94307.3	97436
chr11	70338214	70338868	Psmb6	chr11	+	70338858	70341360	5429	2128.08	3032.74	6136.8	2921.37	4353.21	2944.48	1911.51
chr14	20883930	20884412	1810063B07Rik	chr14	-	20894857	20902394	47428	93028	55992.7	93849.6	53620.2	79888.1	53556.8	33947.5
chr14	20900160	20900707	1810063B07Rik	chr14	-	20894857	20902394	47428	93028	55992.7	93849.6	53620.2	79888.1	53556.8	33947.5
chr7	148605979	148606308	Pddc1	chr7	-	148594082	148600024	44901	43589.9	34696.7	59074	41325.2	61561.4	38229.1	25951.5
chr7	20287781	20288079	Tomm40	chr7	-	20286661	20300778	33702	56068.5	36413.4	56240.7	35353.1	52664.7	34042.3	20399.3
chr6	124880651	124881078	Mlf2	chr6	+	124881405	124886167	10897	7630.94	8481.4	12925.1	5959.39	8873.66	7891.1	5844.41
chr6	124880129	124880549	Mlf2	chr6	+	124881405	124886167	10897	7630.94	8481.4	12925.1	5959.39	8873.66	7891.1	5844.41
chr4	45426348	45427095	Mcart1	chr4	-	45408795	45421638	59506	232307	80145.7	69128.5	55390.1	82469.2	60183.7	50906.2
chr4	132633025	132633298	Ahdc1	chr4	+	132567420	132634025	158921	166410	138044	218700	132887	197798	158345	101986
chr12	109510887	109511545	Ccdc85c	chr12	-	109444554	109513627	127581	99184.7	73162.7	95917.9	72802.1	108346	83574.1	71049.1
chr17	16154677	16155314	Rgmb	chr17	-	15943216	15963550	11409	28205.4	19800.2	29043.9	17683	26305.8	19811.6	15940.6
chr17	16437822	16438248	Rgmb	chr17	-	15943216	15963550	11409	28205.4	19800.2	29043.9	17683	26305.8	19811.6	15940.6
chr2	130527761	130528205	Slc4a11	chr2	-	130509843	130523255	11022	22775.4	12674.6	17767.4	9755.13	14497.7	12183	10932
chr4	134353097	134353518	Ldlrap1	chr4	-	134301326	134323919	62246	59326	43789.3	68252.5	40067.7	59543.1	47089.9	36834.7
chr11	119846803	119847402	Baiap2	chr11	+	119804405	119868096	142433	106897	132244	350525	154264	229233	150325	118542
chr11	119837415	119837889	Baiap2	chr11	+	119804405	119868096	142433	106897	132244	350525	154264	229233	150325	118542
chr11	119806617	119807283	Baiap2	chr11	+	119804405	119868096	142433	106897	132244	350525	154264	229233	150325	118542
chr4	88364527	88364772	Klhl9	chr4	-	88364195	88368412	23298	61871.6	24983	46380.1	19154.7	28452.3	26259.4	13266
chr17	47577590	47577914	AI661453	chr17	+	47573587	47607587	119021	62156.7	86002.9	108013	75539.8	112162	73978.5	87933.8
chr8	87202504	87202804	Nacc1	chr8	-	87194377	87211761	11456	19900.1	18481.5	28152.5	17676.9	26238.3	19996.5	15936.4
chr10	61197030	61197454	Aifm2	chr10	+	61178010	61202008	42289	33190.6	32600.7	40782.6	25424.8	37728.6	29646.4	25845
chr13	29017621	29017989	Sox4	chr13	-	29042598	29045551	5065	7427.08	3936.28	4608.57	2972.43	4410.44	3161.88	4798.27
chr1	74333734	74334085	Pnkd	chr1	+	74331607	74400266	112381	106860	106843	228621	121407	180098	126838	80645.3
chr7	133903824	133904353	Mapk3	chr7	+	133903139	133909330	9999	7299.26	8730.29	9389.01	8165.2	12111.2	9744.36	7658.83
chr7	133890256	133890789	Mapk3	chr7	+	133903139	133909330	9999	7299.26	8730.29	9389.01	8165.2	12111.2	9744.36	7658.83
chr1	21233948	21234374	Gsta3	chr1	+	21230669	21255640	354688	27682.1	141277	237807	269256	399155	157029	238920
chr1	21236064	21236556	Gsta3	chr1	+	21230669	21255640	354688	27682.1	141277	237807	269256	399155	157029	238920
chr1	21243090	21243437	Gsta3	chr1	+	21230669	21255640	354688	27682.1	141277	237807	269256	399155	157029	238920
chr1	21222671	21223082	Gsta3	chr1	+	21230669	21255640	354688	27682.1	141277	237807	269256	399155	157029	238920
chr1	21236734	21237194	Gsta3	chr1	+	21230669	21255640	354688	27682.1	141277	237807	269256	399155	157029	238920
chr6	28847373	28847760	Lrrc4	chr6	-	28778125	28781747	3305	9644.15	7327.26	10190.1	5378.79	7971.86	6830.13	4163.1
chr14	63799574	63800273	Fdft1	chr14	-	63763987	63796630	73962	30538.7	68431.2	107386	63745.7	94464.5	74362.3	68468.5
chr14	63782776	63783389	Fdft1	chr14	-	63763987	63796630	73962	30538.7	68431.2	107386	63745.7	94464.5	74362.3	68468.5
chr14	63787009	63787342	Fdft1	chr14	-	63763987	63796630	73962	30538.7	68431.2	107386	63745.7	94464.5	74362.3	68468.5
chr14	63779104	63779515	Fdft1	chr14	-	63763987	63796630	73962	30538.7	68431.2	107386	63745.7	94464.5	74362.3	68468.5
chr14	63792746	63793169	Fdft1	chr14	-	63763987	63796630	73962	30538.7	68431.2	107386	63745.7	94464.5	74362.3	68468.5
chr14	63779684	63780017	Fdft1	chr14	-	63763987	63796630	73962	30538.7	68431.2	107386	63745.7	94464.5	74362.3	68468.5
chrX	11683884	11684148	Bcor	chrX	-	11613863	11737481	241049	249304	145141	250749	123885	183557	158989	110444
chrX	11520579	11520772	Bcor	chrX	-	11613863	11737481	241049	249304	145141	250749	123885	183557	158989	110444
chrX	11417765	11418202	Bcor	chrX	-	11613863	11737481	241049	249304	145141	250749	123885	183557	158989	110444
chrX	11829239	11829558	Bcor	chrX	-	11613863	11737481	241049	249304	145141	250749	123885	183557	158989	110444
chrX	11480120	11480531	Bcor	chrX	-	11613863	11737481	241049	249304	145141	250749	123885	183557	158989	110444
chrX	11336032	11336468	Bcor	chrX	-	11613863	11737481	241049	249304	145141	250749	123885	183557	158989	110444
chr5	148691846	148692449	Slc46a3	chr5	-	148690016	148706378	50799	33067.1	35104.8	49029.8	44654.6	66152.8	40101.5	36205
chr5	148723398	148723770	Slc46a3	chr5	-	148690016	148706378	50799	33067.1	35104.8	49029.8	44654.6	66152.8	40101.5	36205
chr5	148705683	148706168	Slc46a3	chr5	-	148690016	148706378	50799	33067.1	35104.8	49029.8	44654.6	66152.8	40101.5	36205
chr7	71521864	71522282	Fan1	chr7	-	71491643	71518981	33460	49703.5	44204.1	52932.6	37939.5	56204	41958	38726.1
chr13	54771955	54772324	Rnf44	chr13	-	54780759	54795321	85890	135661	68685.6	106512	58677.4	86885.1	80744.4	39647.9
chr10	95106661	95107078	Nudt4	chr10	-	95009640	95026801	46023	80937.3	48823.5	53407.2	37078.6	54875	48801.9	43199.7
chr10	95114810	95115171	Nudt4	chr10	-	95009640	95026801	46023	80937.3	48823.5	53407.2	37078.6	54875	48801.9	43199.7
chr10	95087824	95088659	Nudt4	chr10	-	95009640	95026801	46023	80937.3	48823.5	53407.2	37078.6	54875	48801.9	43199.7
chr10	95145625	95146025	Nudt4	chr10	-	95009640	95026801	46023	80937.3	48823.5	53407.2	37078.6	54875	48801.9	43199.7
chr6	3150682	3151802	Rgs12	chr5	+	35292096	35376242	72925	66482.1	62346.4	50383.5	47815.8	70757.6	59364	71633.6
chr5	35319396	35319807	Rgs12	chr5	+	35292096	35376242	72925	66482.1	62346.4	50383.5	47815.8	70757.6	59364	71633.6
chr5	35353337	35353819	Rgs12	chr5	+	35292096	35376242	72925	66482.1	62346.4	50383.5	47815.8	70757.6	59364	71633.6
chr19	5888252	5888802	Tigd3	chr19	-	5891137	5894107	3636	10366.4	5951.37	8247.48	4247.86	6284.23	5856.19	2219.73
chr19	5889219	5889695	Tigd3	chr19	-	5891137	5894107	3636	10366.4	5951.37	8247.48	4247.86	6284.23	5856.19	2219.73
chr15	35163786	35164197	Osr2	chr15	+	35225866	35233060	5791	3632.01	3535.63	2880.73	2722.4	4027.06	3598.83	3725.51
chr15	78239956	78240394	Mpst	chr15	+	78237141	78244445	77881	25694	25532.6	39352.6	33462.6	49484	31178.6	23599.7
chr15	78247477	78247703	Mpst	chr15	+	78237141	78244445	77881	25694	25532.6	39352.6	33462.6	49484	31178.6	23599.7
chr4	43404536	43404999	Rusc2	chr4	+	43394853	43439958	119274	156311	102300	157327	88766.5	131215	85245.4	73261.2
chr4	43396193	43396497	Rusc2	chr4	+	43394853	43439958	119274	156311	102300	157327	88766.5	131215	85245.4	73261.2
chr4	43435997	43436497	Rusc2	chr4	+	43394853	43439958	119274	156311	102300	157327	88766.5	131215	85245.4	73261.2
chr11	120121154	120121625	Bahcc1	chr11	+	120094260	120153611	105729	102832	75126.4	75809.4	63730.7	94199.8	84865.5	57280.8
chr12	60141198	60141746	Trappc6b	chr12	-	60144078	60162448	19121	26567.2	21613.9	19737.3	16049.6	23696.5	20962.5	21095.2
chr12	112678807	112679249	Tnfaip2	chr12	+	112680871	112693229	46106	28700.7	39890.4	66063.3	35616.6	52583.1	47083.7	31830.7
chr16	91239196	91239750	Olig2	chr16	+	91225794	91228922	3963	3454.42	1569.29	1425.45	990.599	1461.28	2346.11	981.835
chr11	80176757	80177034	5730455P16Rik	chr11	-	80173993	80191517	19297	18611.2	15134.9	17511.7	12843.2	18942.2	14346.8	12714
chr8	125768241	125768548	1300018I17Rik	chr8	-	125766255	125778075	73899	49720.7	44219.5	51180.2	35735.3	52693	39561.3	39536.8
chr8	28361250	28361560	Eif4ebp1	chr8	+	28370798	28386128	31104	61197	30225.9	32096	24001.2	35384.4	35691.9	22898
chr1	179388862	179389421	Zfp238	chr1	+	179374791	179380897	8261	4492.48	4266.82	6168.58	5178.5	7633.49	4953.39	3369.45
chr1	179405663	179406188	Zfp238	chr1	+	179374791	179380897	8261	4492.48	4266.82	6168.58	5178.5	7633.49	4953.39	3369.45
chr16	92429409	92429637	Rcan1	chr16	-	92392197	92466391	111367	342547	142594	143266	116512	171719	123653	115274
chr16	97978180	97978531	Ripk4	chr16	-	97963548	97985362	25402	45912.1	22172.5	32046.2	20954.2	30877.3	18017.2	21134.3
chr16	97979905	97980293	Ripk4	chr16	-	97963548	97985362	25402	45912.1	22172.5	32046.2	20954.2	30877.3	18017.2	21134.3
chr14	54868661	54869146	Dad1	chr14	-	54855159	54873604	37156	67855.8	38208.5	50802.2	26941	39681.3	33074.5	29617.8
chr14	54771820	54772146	Dad1	chr14	-	54855159	54873604	37156	67855.8	38208.5	50802.2	26941	39681.3	33074.5	29617.8
chr3	94171469	94171843	C2cd4d	chr3	+	94166365	94168489	33541	13974.4	9553.1	18695.6	12776	18810.6	8723.48	7070.66
chr18	38830234	38830948	Spry4	chr18	-	38745918	38760922	53642	64974.2	22365	35388.9	26179.6	38541.9	21659.5	20997.9
chr18	38843968	38844508	Spry4	chr18	-	38745918	38760922	53642	64974.2	22365	35388.9	26179.6	38541.9	21659.5	20997.9
chr18	38871288	38871768	Spry4	chr18	-	38745918	38760922	53642	64974.2	22365	35388.9	26179.6	38541.9	21659.5	20997.9
chr11	113592136	113592553	Cdc42ep4	chr11	-	113588163	113613129	266679	190759	138856	189031	111002	163388	162484	100221
chr5	130604921	130605338	Tpst1	chr5	+	130549195	130611599	105505	96287.1	68140.4	101625	60990.3	89749.2	65032.1	58559.9
chr5	130550435	130550826	Tpst1	chr5	+	130549195	130611599	105505	96287.1	68140.4	101625	60990.3	89749.2	65032.1	58559.9
chr2	154169621	154170035	Cdk5rap1	chr2	-	154161121	154198455	38116	55145.9	37210.4	33610.8	31200.2	45901.2	32548.7	34890.1
chr3	132670288	132670793	Gstcd	chr3	-	132645514	132754704	24609	20360.8	32602.2	24272.1	33717.4	49559.9	30255.9	35956.2
chr7	20451847	20452305	Ceacam16	chr7	-	20437445	20446648	4721	10481.1	5781.25	4904.49	3673.84	5399.59	3989.56	6061.96
chr7	20453120	20453575	Ceacam16	chr7	-	20437445	20446648	4721	10481.1	5781.25	4904.49	3673.84	5399.59	3989.56	6061.96
chr7	20450602	20450985	Ceacam16	chr7	-	20437445	20446648	4721	10481.1	5781.25	4904.49	3673.84	5399.59	3989.56	6061.96
chr8	87414685	87415103	Gcdh	chr8	-	87410285	87417820	90599	79583.1	55944.3	94750.8	61847.5	90899.7	47817.9	47331.9
chr11	77990582	77991376	Nek8	chr11	-	77979607	77990168	19141	18659.8	14166.1	15587.4	13109.8	19261.9	15518.3	10929.5
chr17	80952490	80952967	Cdkl4	chr17	-	80922889	80963174	21544	19133.6	20711	15794.7	16604.4	24390.4	19614.8	25755.6
chr18	34918725	34919051	Fam53c	chr18	+	34918559	34933414	78924	164117	66290.6	90550	50798.8	74618.5	78748.1	36613.4
chr11	72275034	72275557	Spns2	chr11	-	72265139	72303406	143604	87885.9	95005	117774	96605.9	141853	87231.9	83576.2
chr19	44394311	44394669	Scd4	chr19	+	44407815	44421233	11093	3182.47	6117.69	3887.43	3296.95	4841.12	5347.37	7470.4
chr5	140845454	140845956	Snx8	chr5	-	140816256	140865201	56118	69752	52170.8	63206	45490.7	66735.7	44583	49997.4
chrX	94710392	94710555	Eda2r	chrX	-	94529179	94572548	2361	545.712	7206.16	2658.97	4176.27	6125.92	8003.04	8157.15
chrX	94626671	94626979	Eda2r	chrX	-	94529179	94572548	2361	545.712	7206.16	2658.97	4176.27	6125.92	8003.04	8157.15
chrX	94885543	94885923	Eda2r	chrX	-	94529179	94572548	2361	545.712	7206.16	2658.97	4176.27	6125.92	8003.04	8157.15
chr4	118788944	118789535	Slc2a1	chr4	+	118781349	118809934	24281	50845.5	42923.3	70617	43524.7	63831.2	42094.2	40966
chr4	118791846	118792344	Slc2a1	chr4	+	118781349	118809934	24281	50845.5	42923.3	70617	43524.7	63831.2	42094.2	40966
chr6	48185595	48185998	Zfp746	chr6	-	48012393	48036592	49951	76539.4	59339	73734.1	40666.7	59626.2	39183.5	42899.4
chr6	48071112	48071506	Zfp746	chr6	-	48012393	48036592	49951	76539.4	59339	73734.1	40666.7	59626.2	39183.5	42899.4
chr7	86521446	86521752	Rlbp1	chr7	-	86519755	86531913	10149	4223.31	6286.89	3750.19	3402.75	4989.13	7113.97	6965.84
chr16	3235812	3236823	5330426P16Rik	chr16	-	50726863	50732886	7121	12787	10572.2	10380.5	8646.31	12672	9874.36	7624.72
chr16	50764124	50764477	5330426P16Rik	chr16	-	50726863	50732886	7121	12787	10572.2	10380.5	8646.31	12672	9874.36	7624.72
chr10	6178502	6178768	Mthfd1l	chr10	-	6179459	6373466	72893	79102.4	95364.5	71123.8	76782.3	112525	90911	107775
chr13	54138435	54138735	Drd1a	chr13	-	54146552	54151027	1889	2348.28	1781.62	1707.17	1207.47	1769.5	2120.05	1015.94
chr13	54001191	54001458	Drd1a	chr13	-	54146552	54151027	1889	2348.28	1781.62	1707.17	1207.47	1769.5	2120.05	1015.94
chr4	140796254	140796859	Arhgef19	chr4	+	140798798	140813477	44969	28386.9	30931.2	76627.6	40690.6	59624.7	41349.9	22936.2
chr11	63701536	63701946	Hs3st3b1	chr11	-	63698194	63735786	171671	223004	155396	225145	144459	211589	181353	124650
chr11	63638418	63638778	Hs3st3b1	chr11	-	63698194	63735786	171671	223004	155396	225145	144459	211589	181353	124650
chr11	63725027	63725489	Hs3st3b1	chr11	-	63698194	63735786	171671	223004	155396	225145	144459	211589	181353	124650
chr11	63588719	63589349	Hs3st3b1	chr11	-	63698194	63735786	171671	223004	155396	225145	144459	211589	181353	124650
chr11	63500275	63500698	Hs3st3b1	chr11	-	63698194	63735786	171671	223004	155396	225145	144459	211589	181353	124650
chr11	63676611	63677137	Hs3st3b1	chr11	-	63698194	63735786	171671	223004	155396	225145	144459	211589	181353	124650
chr17	24526674	24527145	Abca3	chr17	+	24488990	24547146	66081	54534.3	60880.6	67147.1	63018.2	92271.5	66042.9	62168.4
chr8	26705045	26705430	Letm2	chr8	-	26688961	26707959	73022	77700.5	39871.8	54258.9	35860	52500.3	42440.1	29201.8
chr8	26703213	26703479	Letm2	chr8	-	26688961	26707959	73022	77700.5	39871.8	54258.9	35860	52500.3	42440.1	29201.8
chr8	26707421	26707747	Letm2	chr8	-	26688961	26707959	73022	77700.5	39871.8	54258.9	35860	52500.3	42440.1	29201.8
chr3	83669052	83669669	Tlr2	chr3	-	83640193	83645530	4997	7533.39	5458.44	5565.43	3744.11	5478.56	6454.2	4832.8
chr2	131699140	131699488	Erv3	chr2	-	131679413	131685483	945	615.792	2193.28	1374.65	1732.8	2535.12	1958.63	3480.51
chr5	136158733	136159261	Por	chr5	+	136165083	136211195	421760	695469	375766	446992	406420	594590	330682	285017
chr5	136183950	136184390	Por	chr5	+	136165083	136211195	421760	695469	375766	446992	406420	594590	330682	285017
chr5	136166261	136166889	Por	chr5	+	136165083	136211195	421760	695469	375766	446992	406420	594590	330682	285017
chr5	136170898	136171711	Por	chr5	+	136165083	136211195	421760	695469	375766	446992	406420	594590	330682	285017
chr9	108244442	108245021	Gpx1	chr9	+	108241606	108242671	47375	37789.2	14694.6	19849.7	12711.6	18589.8	21394.8	9435.4
chr5	37722312	37722841	Evc	chr5	-	37690409	37728120	30361	28025.4	22655.9	17088.2	16099.1	23542.4	20903.7	24171.6
chr8	24365460	24365819	Golga7	chr8	-	24351797	24367552	39953	37827	30913.4	37069.3	28305.9	41388	28926.3	29292.9
chr8	24366235	24366784	Golga7	chr8	-	24351797	24367552	39953	37827	30913.4	37069.3	28305.9	41388	28926.3	29292.9
chr11	97598904	97599422	Pip4k2b	chr11	-	97576470	97606018	43516	32977.6	28996.1	47046.3	29346.8	42908.2	32904	27366.6
chr17	13128598	13129020	Acat3	chr17	-	13116824	13133262	47468	59279.4	46015.7	81992.6	55911	81735.6	55037	52752.3
chr17	13123483	13123926	Acat3	chr17	-	13116824	13133262	47468	59279.4	46015.7	81992.6	55911	81735.6	55037	52752.3
chr17	13130435	13130903	Acat3	chr17	-	13116824	13133262	47468	59279.4	46015.7	81992.6	55911	81735.6	55037	52752.3
chr2	131047795	131048254	2310035K24Rik	chr2	+	131036175	131039250	15234	12596.7	10812.7	9731.89	8588.41	12554.9	11061.7	8390.92
chr2	131041408	131042143	2310035K24Rik	chr2	+	131036175	131039250	15234	12596.7	10812.7	9731.89	8588.41	12554.9	11061.7	8390.92
chr2	131042166	131042427	2310035K24Rik	chr2	+	131036175	131039250	15234	12596.7	10812.7	9731.89	8588.41	12554.9	11061.7	8390.92
chr5	135492050	135492428	2010001M06Rik	chr5	-	135487991	135489027	265	380.068	795.894	1954.69	1398.28	2043.78	758.267	728.931
chr2	174342497	174342884	Slmo2	chr2	-	174290591	174298442	18534	36092.9	19512.9	24695.4	18346.2	26812	17489.6	14113.7
chr2	125432157	125432542	Cep152	chr2	-	125388823	125450849	48661	29426.2	40423	38732.6	35228.6	51464.3	42972	45579.5
chr2	125443127	125443597	Cep152	chr2	-	125388823	125450849	48661	29426.2	40423	38732.6	35228.6	51464.3	42972	45579.5
chr6	41450879	41451500	Prss2	chr6	+	41471774	41475078	2833	188.145	758.279	742.121	619.5	904.326	677.738	1218.93
chr2	25328016	25328531	Ptgds	chr2	-	25322231	25325269	1889	3095.26	2442.7	1950.11	2169.7	3166.07	3031.51	2351.59
chr2	25335141	25335517	Ptgds	chr2	-	25322231	25325269	1889	3095.26	2442.7	1950.11	2169.7	3166.07	3031.51	2351.59
chr9	111173105	111173485	Mlh1	chr9	-	111130731	111174112	53064	51429.7	52342.4	61562	48605.6	70885.4	48894.7	47261.6
chr5	136539246	136539504	2310043J07Rik	chr5	+	136533136	136540194	5901	3744.3	3152.66	3025.2	3447.23	5027.28	2958.57	3365.29
chr15	101752817	101753169	Krt4	chr15	-	101748965	101755166	4205	5224.74	3710.73	3271.27	1906.51	2779.64	3398.77	3248.82
chr2	174255345	174255621	Ctsz	chr2	-	174252994	174264493	42033	54703.5	41342.6	55568.7	29051.8	42342.5	35083	29565.8
chr4	53866608	53867060	Tmem38b	chr4	+	53838916	53874890	17488	15823.9	26742.7	23629.5	18990.8	27671.1	30324.5	25959.8
chr4	54043132	54043557	Tmem38b	chr4	+	53838916	53874890	17488	15823.9	26742.7	23629.5	18990.8	27671.1	30324.5	25959.8
chr4	53873417	53873949	Tmem38b	chr4	+	53838916	53874890	17488	15823.9	26742.7	23629.5	18990.8	27671.1	30324.5	25959.8
chr4	54037016	54037565	Tmem38b	chr4	+	53838916	53874890	17488	15823.9	26742.7	23629.5	18990.8	27671.1	30324.5	25959.8
chr4	53890401	53890770	Tmem38b	chr4	+	53838916	53874890	17488	15823.9	26742.7	23629.5	18990.8	27671.1	30324.5	25959.8
chr4	54215328	54215663	Tmem38b	chr4	+	53838916	53874890	17488	15823.9	26742.7	23629.5	18990.8	27671.1	30324.5	25959.8
chr5	128113551	128114037	Glt1d1	chr5	+	128112631	128187890	121232	65744.3	72468.9	111591	93454.5	136168	64522.2	105368
chr5	128117907	128118630	Glt1d1	chr5	+	128112631	128187890	121232	65744.3	72468.9	111591	93454.5	136168	64522.2	105368
chr5	128121602	128122392	Glt1d1	chr5	+	128112631	128187890	121232	65744.3	72468.9	111591	93454.5	136168	64522.2	105368
chr7	19938480	19938808	Ercc1	chr7	+	19930419	19941873	11751	17675.5	13937.4	18298.8	14292.3	20824.4	15392.3	9784.81
chr10	79731366	79731748	Dazap1	chr10	+	79727735	79751158	161599	91428.9	101475	119557	87210.5	127019	100869	97215.5
chr10	79734985	79735483	Dazap1	chr10	+	79727735	79751158	161599	91428.9	101475	119557	87210.5	127019	100869	97215.5
chr7	31850012	31850273	Lgi4	chr7	+	31844953	31855954	5901	13913.8	7218.48	6132.95	4218.64	6144.23	6640.9	7951.67
chr15	98450314	98450584	Adcy6	chr15	-	98420420	98438064	43220	26935.6	25583	38273	20300.2	29555.2	25634	21741.6
chr2	172726390	172726944	Bmp7	chr2	-	172695188	172765794	60889	59371.4	49267.4	39796.2	38429.3	55942.7	48840.9	50610.5
chr2	172649298	172649646	Bmp7	chr2	-	172695188	172765794	60889	59371.4	49267.4	39796.2	38429.3	55942.7	48840.9	50610.5
chr1	31102828	31103322	Ptp4a1	chr1	-	30997147	31006600	38872	153603	38582	56404.7	30732.5	44715.2	43605.1	22400.5
chr1	30995586	30995843	Ptp4a1	chr1	-	30997147	31006600	38872	153603	38582	56404.7	30732.5	44715.2	43605.1	22400.5
chr1	31090543	31091211	Ptp4a1	chr1	-	30997147	31006600	38872	153603	38582	56404.7	30732.5	44715.2	43605.1	22400.5
chr1	31076038	31076436	Ptp4a1	chr1	-	30997147	31006600	38872	153603	38582	56404.7	30732.5	44715.2	43605.1	22400.5
chr1	31007289	31007752	Ptp4a1	chr1	-	30997147	31006600	38872	153603	38582	56404.7	30732.5	44715.2	43605.1	22400.5
chr1	31072025	31072518	Ptp4a1	chr1	-	30997147	31006600	38872	153603	38582	56404.7	30732.5	44715.2	43605.1	22400.5
chr2	25407479	25407761	Traf2	chr2	-	25373501	25402414	40390	42359.1	40369.7	64834.6	36614.1	53246.5	46516.1	31089.1
chr4	151436229	151436901	Nol9	chr4	+	151413435	151435603	32965	38585.5	30169.1	37978	29381.3	42726.3	27444.6	22888.8
chr6	72351916	72352335	Vamp8	chr6	-	72335214	72340661	40976	40508	29289.5	40305.9	24505.7	35630.5	31308.2	22862.6
chr1	182155897	182156334	Psen2	chr1	-	182157134	182186431	85831	74131.6	56827.9	99132.8	60220	87520.6	56723.5	49042.7
chr1	182177921	182178344	Psen2	chr1	-	182157134	182186431	85831	74131.6	56827.9	99132.8	60220	87520.6	56723.5	49042.7
chr12	16568894	16569386	Lpin1	chr12	-	16542474	16596576	581688	966089	506141	320023	218601	317631	314975	226306
chr12	16625221	16625993	Lpin1	chr12	-	16542474	16596576	581688	966089	506141	320023	218601	317631	314975	226306
chr12	16595534	16595994	Lpin1	chr12	-	16542474	16596576	581688	966089	506141	320023	218601	317631	314975	226306
chr7	19595735	19596220	Irf2bp1	chr7	+	19589413	19592112	24979	38415.5	17289.9	27786.5	20831.5	30265.1	21594.5	9191.65
chr7	19591969	19592201	Irf2bp1	chr7	+	19589413	19592112	24979	38415.5	17289.9	27786.5	20831.5	30265.1	21594.5	9191.65
chr2	181605794	181606189	Polr3k	chr2	+	181599064	181605531	709	936.725	2567.6	2650.3	2337.61	3396.1	2280.39	2981.77
chr2	181664864	181665977	Polr3k	chr2	+	181599064	181605531	709	936.725	2567.6	2650.3	2337.61	3396.1	2280.39	2981.77
chr5	143743462	143743611	Fscn1	chr5	+	143722033	143734868	21477	12726.9	11447.7	9711.18	9816.72	14261.2	12734.1	11301
chr14	30812210	30812852	Il17rb	chr14	-	30809353	30822082	39179	24245	36239.1	33172.3	27560.3	40032.7	37435	30848.2
chr14	30809199	30809655	Il17rb	chr14	-	30809353	30822082	39179	24245	36239.1	33172.3	27560.3	40032.7	37435	30848.2
chr5	111228964	111229564	Ulk1	chr5	-	111213507	111239100	224427	273772	162442	168607	94687.5	137525	144577	153620
chr8	11785991	11786358	Arhgef7	chr8	+	11728104	11827152	164832	154175	136439	177014	133205	193380	133765	130403
chr8	11813864	11814365	Arhgef7	chr8	+	11728104	11827152	164832	154175	136439	177014	133205	193380	133765	130403
chr12	58609443	58609999	Foxa1	chr12	-	58641618	58647108	57360	39597.7	25446	55709.3	25930.6	37608.8	33350.7	15822.9
chr10	75397508	75398162	Chchd10	chr10	+	75398317	75400479	41810	34668.6	17034.9	34270.7	15792.7	22903.1	15499.5	14330.4
chr2	119185273	119185645	Chac1	chr2	+	119176977	119180062	6373	11414.5	7824.12	13124.7	2318.93	3362.53	7041.74	3066.21
chr5	147035499	147035934	Rnf6	chr5	-	147020779	147033013	22464	33880.2	22498.8	29968.2	18613.4	26987.1	22172.3	21029.5
chr7	13603385	13603779	Trim28	chr7	+	13609500	13616381	27701	27673	21167.9	34060.5	19554.8	28326.4	20377.5	16175.6
chr1	154156638	154157035	Tsen15	chr1	-	154217865	154233812	6981	13254.1	12211.3	10062	13482.2	19520.9	14550.9	9629.65
chr6	91055727	91056219	Nup210	chr6	-	90963060	91066820	108623	68017.9	86579.1	90545.1	74123.3	107321	82750.8	87832.3
chr6	90948440	90948795	Nup210	chr6	-	90963060	91066820	108623	68017.9	86579.1	90545.1	74123.3	107321	82750.8	87832.3
chr6	91042520	91042973	Nup210	chr6	-	90963060	91066820	108623	68017.9	86579.1	90545.1	74123.3	107321	82750.8	87832.3
chr17	46188107	46188611	Vegfa	chr17	-	46153942	46169326	299242	303701	172491	268332	142549	206354	199610	106887
chr17	46136360	46136909	Vegfa	chr17	-	46153942	46169326	299242	303701	172491	268332	142549	206354	199610	106887
chr17	46202728	46203136	Vegfa	chr17	-	46153942	46169326	299242	303701	172491	268332	142549	206354	199610	106887
chr17	46192601	46193041	Vegfa	chr17	-	46153942	46169326	299242	303701	172491	268332	142549	206354	199610	106887
chr17	46094892	46095506	Vegfa	chr17	-	46153942	46169326	299242	303701	172491	268332	142549	206354	199610	106887
chr17	46193312	46193675	Vegfa	chr17	-	46153942	46169326	299242	303701	172491	268332	142549	206354	199610	106887
chr17	46110227	46110628	Vegfa	chr17	-	46153942	46169326	299242	303701	172491	268332	142549	206354	199610	106887
chr18	13146331	13146491	Impact	chr18	+	13130760	13151457	26815	48555.6	30317.1	57396.9	31779.8	46002	27716.2	20577.3
chr14	32900994	32901394	Oxnad1	chr14	+	32898913	32916389	8182	15032.7	15830.6	18888.5	15626.7	22619.2	13833.7	14514.7
chr14	32901667	32902062	Oxnad1	chr14	+	32898913	32916389	8182	15032.7	15830.6	18888.5	15626.7	22619.2	13833.7	14514.7
chr14	32906104	32906600	Oxnad1	chr14	+	32898913	32916389	8182	15032.7	15830.6	18888.5	15626.7	22619.2	13833.7	14514.7
chr15	79267713	79267976	Csnk1e	chr15	-	79248281	79272487	37855	38615.8	32659.2	38985	27851.9	40309.2	30588.5	27040.5
chr4	149604857	149605313	Eno1	chr4	+	149611305	149622982	40193	38518.2	41348.5	39036	29218.9	42281.5	17747.5	39694
chr4	60161044	60161443	Mup15	chr4	-	60079340	60152730	3069	94.5725	1921.72	340.5	1609.1	2327.98	1443.67	3927.67
chr4	60090978	60091387	Mup15	chr4	-	60079340	60152730	3069	94.5725	1921.72	340.5	1609.1	2327.98	1443.67	3927.67
chr4	60097565	60098310	Mup15	chr4	-	60079340	60152730	3069	94.5725	1921.72	340.5	1609.1	2327.98	1443.67	3927.67
chr4	61112043	61113079	Mup15	chr4	-	60079340	60152730	3069	94.5725	1921.72	340.5	1609.1	2327.98	1443.67	3927.67
chr4	60154710	60155118	Mup15	chr4	-	60079340	60152730	3069	94.5725	1921.72	340.5	1609.1	2327.98	1443.67	3927.67
chr4	61106995	61107819	Mup15	chr4	-	60079340	60152730	3069	94.5725	1921.72	340.5	1609.1	2327.98	1443.67	3927.67
chr4	61101323	61101952	Mup15	chr4	-	60079340	60152730	3069	94.5725	1921.72	340.5	1609.1	2327.98	1443.67	3927.67
chr4	61138354	61138616	Mup15	chr4	-	60079340	60152730	3069	94.5725	1921.72	340.5	1609.1	2327.98	1443.67	3927.67
chr4	61102484	61103285	Mup15	chr4	-	60079340	60152730	3069	94.5725	1921.72	340.5	1609.1	2327.98	1443.67	3927.67
chr4	60153189	60153872	Mup15	chr4	-	60079340	60152730	3069	94.5725	1921.72	340.5	1609.1	2327.98	1443.67	3927.67
chr4	60102703	60103080	Mup15	chr4	-	60079340	60152730	3069	94.5725	1921.72	340.5	1609.1	2327.98	1443.67	3927.67
chr4	60091666	60092069	Mup15	chr4	-	60079340	60152730	3069	94.5725	1921.72	340.5	1609.1	2327.98	1443.67	3927.67
chr4	60167080	60167730	Mup15	chr4	-	60079340	60152730	3069	94.5725	1921.72	340.5	1609.1	2327.98	1443.67	3927.67
chr4	60160152	60160751	Mup15	chr4	-	60079340	60152730	3069	94.5725	1921.72	340.5	1609.1	2327.98	1443.67	3927.67
chr4	60161749	60162620	Mup15	chr4	-	60079340	60152730	3069	94.5725	1921.72	340.5	1609.1	2327.98	1443.67	3927.67
chr4	60092699	60093303	Mup15	chr4	-	60079340	60152730	3069	94.5725	1921.72	340.5	1609.1	2327.98	1443.67	3927.67
chr13	63658658	63658978	Ptch1	chr13	-	63612840	63666828	134520	153238	120638	151277	127340	184201	145721	102165
chr14	8845593	8845973	Abhd6	chr14	+	8835415	8889069	56677	26745.2	32493.4	32385.4	34587	50017.7	31067	37992.8
chr14	8832823	8833196	Abhd6	chr14	+	8835415	8889069	56677	26745.2	32493.4	32385.4	34587	50017.7	31067	37992.8
chr14	8838416	8838832	Abhd6	chr14	+	8835415	8889069	56677	26745.2	32493.4	32385.4	34587	50017.7	31067	37992.8
chr14	8848715	8849262	Abhd6	chr14	+	8835415	8889069	56677	26745.2	32493.4	32385.4	34587	50017.7	31067	37992.8
chr4	128476341	128476766	Zfp362	chr4	-	128450328	128483356	56791	44016.7	47911.6	63627.1	41411.5	59881.4	54910.6	40464.8
chr10	118699882	118700313	Cand1	chr10	-	118635867	118677111	51102	62281.3	46466.9	59264.7	39665.5	57349.2	45840.4	38483.6
chr4	133424394	133424663	Rps6ka1	chr4	-	133403205	133443714	73271	52540.6	48272.2	61482.7	38814.9	56102.2	42993.3	42347
chr4	133435258	133435731	Rps6ka1	chr4	-	133403205	133443714	73271	52540.6	48272.2	61482.7	38814.9	56102.2	42993.3	42347
chr13	60368685	60369051	Gm5084	chr13	+	60306831	60317379	3305	1780.47	4990.68	1710.3	3143.77	4540.52	5354.59	5684.68
chr11	3057533	3065078	Sfi1	chr11	-	3031852	3093466	856793	1.51817e+06	1.1615e+06	941366	998833	1.44242e+06	958034	1.06966e+06
chr6	5399914	5400344	Pdk4	chr6	-	5433350	5446278	22073	47138.9	15811.7	44146.1	13890.1	20045.8	14937.6	10860.1
chr6	5446380	5446863	Pdk4	chr6	-	5433350	5446278	22073	47138.9	15811.7	44146.1	13890.1	20045.8	14937.6	10860.1
chr6	5459532	5460089	Pdk4	chr6	-	5433350	5446278	22073	47138.9	15811.7	44146.1	13890.1	20045.8	14937.6	10860.1
chr6	5467367	5467837	Pdk4	chr6	-	5433350	5446278	22073	47138.9	15811.7	44146.1	13890.1	20045.8	14937.6	10860.1
chr6	5423944	5424361	Pdk4	chr6	-	5433350	5446278	22073	47138.9	15811.7	44146.1	13890.1	20045.8	14937.6	10860.1
chr6	5448586	5449212	Pdk4	chr6	-	5433350	5446278	22073	47138.9	15811.7	44146.1	13890.1	20045.8	14937.6	10860.1
chr2	155720732	155721096	Uqcc	chr2	-	155672621	155756046	87026	86018.5	78649	77549.3	69237.4	99882.2	79322.7	76400
chr2	155749539	155749807	Uqcc	chr2	-	155672621	155756046	87026	86018.5	78649	77549.3	69237.4	99882.2	79322.7	76400
chrX	137102396	137102832	Tsc22d3	chrX	-	137074067	137135061	194207	96044.7	103032	307590	163985	236546	116183	81228.9
chrX	137077692	137078024	Tsc22d3	chrX	-	137074067	137135061	194207	96044.7	103032	307590	163985	236546	116183	81228.9
chrX	137088190	137088741	Tsc22d3	chrX	-	137074067	137135061	194207	96044.7	103032	307590	163985	236546	116183	81228.9
chr11	114684150	114684484	Gpr142	chr11	+	114660237	114668059	9205	6236.51	4725.54	4182.63	2351.82	3391.52	4137.26	4755.84
chr1	34808510	34808834	Arhgef4	chr1	+	34858566	34869599	22657	30838.9	19881.5	26788.3	16628.4	23965.5	19493.5	15034.2
chr11	95584273	95584676	B130006D01Rik	chr11	+	95584899	95588087	3069	562.435	1389.21	1328.42	866.899	1248.8	1250.11	1648.62
chr11	95585770	95586244	B130006D01Rik	chr11	+	95584899	95588087	3069	562.435	1389.21	1328.42	866.899	1248.8	1250.11	1648.62
chr11	95580768	95581151	B130006D01Rik	chr11	+	95584899	95588087	3069	562.435	1389.21	1328.42	866.899	1248.8	1250.11	1648.62
chr11	95587795	95588159	B130006D01Rik	chr11	+	95584899	95588087	3069	562.435	1389.21	1328.42	866.899	1248.8	1250.11	1648.62
chr5	137458496	137458808	Znhit1	chr5	-	137458070	137463752	31625	69462.5	38405.5	58364.6	36389.3	52401.9	44171.7	22831.4
chr5	125620397	125620842	Ncor2	chr5	-	125497524	125659584	397711	448916	302212	424110	332931	479348	365331	221433
chr5	125501583	125502289	Ncor2	chr5	-	125497524	125659584	397711	448916	302212	424110	332931	479348	365331	221433
chr5	125558620	125558969	Ncor2	chr5	-	125497524	125659584	397711	448916	302212	424110	332931	479348	365331	221433
chr5	125643764	125644158	Ncor2	chr5	-	125497524	125659584	397711	448916	302212	424110	332931	479348	365331	221433
chr5	125655728	125656017	Ncor2	chr5	-	125497524	125659584	397711	448916	302212	424110	332931	479348	365331	221433
chr5	125648243	125648973	Ncor2	chr5	-	125497524	125659584	397711	448916	302212	424110	332931	479348	365331	221433
chr5	125729142	125729803	Ncor2	chr5	-	125497524	125659584	397711	448916	302212	424110	332931	479348	365331	221433
chr5	125653080	125653694	Ncor2	chr5	-	125497524	125659584	397711	448916	302212	424110	332931	479348	365331	221433
chr7	52358958	52359612	Fcgrt	chr7	-	52348362	52359192	59321	39882.4	38787.6	49625	36293	52238.3	39213.5	34959.6
chr7	52358319	52358611	Fcgrt	chr7	-	52348362	52359192	59321	39882.4	38787.6	49625	36293	52238.3	39213.5	34959.6
chr7	20280601	20281163	Apoc1	chr7	-	20274829	20278007	250822	36880.5	84954.9	128335	110441	158864	100819	75633.4
chr2	75557378	75557788	Nfe2l2	chr2	-	75513575	75542698	161898	229660	139599	190466	126549	182026	136916	128172
chr2	75606133	75606776	Nfe2l2	chr2	-	75513575	75542698	161898	229660	139599	190466	126549	182026	136916	128172
chr2	75561000	75561363	Nfe2l2	chr2	-	75513575	75542698	161898	229660	139599	190466	126549	182026	136916	128172
chr4	115689457	115689837	Faah	chr4	-	115669260	115690507	71754	32162.9	41677.8	71139	48712.2	70051.9	45603.5	45802.8
chr4	115687992	115688399	Faah	chr4	-	115669260	115690507	71754	32162.9	41677.8	71139	48712.2	70051.9	45603.5	45802.8
chr4	115683697	115684040	Faah	chr4	-	115669260	115690507	71754	32162.9	41677.8	71139	48712.2	70051.9	45603.5	45802.8
chr4	115680189	115680780	Faah	chr4	-	115669260	115690507	71754	32162.9	41677.8	71139	48712.2	70051.9	45603.5	45802.8
chr4	115661250	115661647	Faah	chr4	-	115669260	115690507	71754	32162.9	41677.8	71139	48712.2	70051.9	45603.5	45802.8
chr10	127196204	127196619	Rdh1	chr10	+	127196818	127205355	17465	1872.45	4992.25	3509.17	2008.89	2886.45	4838.19	7640.53
chr7	133622598	133622956	Sh2b1	chr7	-	133610507	133618644	32116	50809.7	25963	40517.5	20718.1	29760.4	25352.3	17166.4
chr16	55947309	55947641	Cep97	chr16	-	55900000	55934961	16385	14028.1	18098.5	18582	16198.8	23264.3	17318.8	17795.4
chr8	25579595	25579907	1810011O10Rik	chr8	-	25548087	25549418	33436	106629	30759.8	63001.8	30451.2	43732.6	36582.4	22334.3
chr8	25538846	25539296	1810011O10Rik	chr8	-	25548087	25549418	33436	106629	30759.8	63001.8	30451.2	43732.6	36582.4	22334.3
chr8	25560906	25561236	1810011O10Rik	chr8	-	25548087	25549418	33436	106629	30759.8	63001.8	30451.2	43732.6	36582.4	22334.3
chr1	193899319	193899937	Traf5	chr1	-	193821087	193916445	57779	44665.4	45950	57632.9	52259.7	75049.5	52478.5	42305.4
chr5	135695829	135696107	Baz1b	chr5	+	135663192	135721999	29546	30824.2	61402.5	65420.2	67399.8	96757.6	69225.4	56909
chr12	55815091	55815730	Eapp	chr12	-	55774453	55796852	18611	52599.5	31191.7	37054.4	25151	36105.4	30844.2	25803.4
chr12	55835193	55835755	Eapp	chr12	-	55774453	55796852	18611	52599.5	31191.7	37054.4	25151	36105.4	30844.2	25803.4
chr12	55820039	55820567	Eapp	chr12	-	55774453	55796852	18611	52599.5	31191.7	37054.4	25151	36105.4	30844.2	25803.4
chr12	55811146	55811847	Eapp	chr12	-	55774453	55796852	18611	52599.5	31191.7	37054.4	25151	36105.4	30844.2	25803.4
chr12	55830479	55830878	Eapp	chr12	-	55774453	55796852	18611	52599.5	31191.7	37054.4	25151	36105.4	30844.2	25803.4
chr12	55838997	55839735	Eapp	chr12	-	55774453	55796852	18611	52599.5	31191.7	37054.4	25151	36105.4	30844.2	25803.4
chr18	3220614	3221127	Pcyox1l	chr18	-	61856490	61867289	11083	18143.3	13928.5	23582.8	12362.8	17746.7	16715.8	9562.68
chr9	65314442	65314813	Spg21	chr9	+	65308743	65336277	14143	10707.7	18587	15827.5	13302.7	19095.2	17490	20925.1
chr4	46547779	46548623	Trim14	chr4	-	46519718	46549016	59884	59956.7	60743.5	111175	54834.5	78679.6	65376.6	49440.8
chr2	93298901	93299323	Cd82	chr2	-	93259272	93303103	155979	96191.6	81745.1	129414	81420.3	116799	89241.5	77939.9
chr8	12842087	12842720	Atp11a	chr8	+	12757015	12868728	61361	97924.9	104132	111498	76052.5	109039	111680	102753
chr11	48901822	48902207	Ifi47	chr11	+	48900556	48910473	16993	8048.24	21814.5	39590.8	23963.5	34344.2	24702.3	12897
chr11	48903636	48903920	Ifi47	chr11	+	48900556	48910473	16993	8048.24	21814.5	39590.8	23963.5	34344.2	24702.3	12897
chr12	113188786	113189124	5033406O09Rik	chr12	-	113180201	113182693	12184	9025.77	6274.44	11883.5	5822	8343.03	4945.45	4115.68
chr10	82240742	82241285	Nfyb	chr10	-	82211444	82226886	66360	110560	69263.5	107967	49014.3	70227.3	86512.2	45923.5
chr10	82221542	82222031	Nfyb	chr10	-	82211444	82226886	66360	110560	69263.5	107967	49014.3	70227.3	86512.2	45923.5
chr3	88260266	88260663	Sema4a	chr3	-	88239883	88265104	84017	72623.2	71884.9	91368.8	51956	74441.5	70585.4	60663
chr3	88275131	88275606	Sema4a	chr3	-	88239883	88265104	84017	72623.2	71884.9	91368.8	51956	74441.5	70585.4	60663
chr18	80412537	80412891	Txnl4a	chr18	+	80403536	80422590	38124	33265	40604.2	47295.7	29298.9	41937.4	31623.9	36712.8
chr2	72390853	72391216	Cdca7	chr2	+	72314275	72324947	3727	4155.22	4336.16	4381.51	5134.55	7348.15	3870.75	5532.44
chr4	138857690	138858173	Pqlc2	chr4	-	138853919	138866615	64895	54694	46887.2	73566.5	36956.2	52888.7	45332.7	31390.6
chr4	138854876	138855384	Pqlc2	chr4	-	138853919	138866615	64895	54694	46887.2	73566.5	36956.2	52888.7	45332.7	31390.6
chr7	26262081	26262370	Ceacam1	chr7	-	26246720	26262644	5894	3644.36	5769.46	8423.49	5737.52	8203.41	6038.19	5863.96
chr3	145288088	145288521	Cyr61	chr3	-	145309934	145312949	70927	54302.1	30066	31845.1	30641.5	43808.1	37050.4	22987.8
chr3	145353863	145354167	Cyr61	chr3	-	145309934	145312949	70927	54302.1	30066	31845.1	30641.5	43808.1	37050.4	22987.8
chr3	145313082	145313694	Cyr61	chr3	-	145309934	145312949	70927	54302.1	30066	31845.1	30641.5	43808.1	37050.4	22987.8
chr3	145297047	145297324	Cyr61	chr3	-	145309934	145312949	70927	54302.1	30066	31845.1	30641.5	43808.1	37050.4	22987.8
chr3	145289024	145289492	Cyr61	chr3	-	145309934	145312949	70927	54302.1	30066	31845.1	30641.5	43808.1	37050.4	22987.8
chr8	124241963	124242437	Jph3	chr8	+	124254462	124314721	48863	69779.8	43391.6	40051.2	35068.6	50097.4	44481.9	41340.4
chr2	27331510	27331793	Brd3	chr2	-	27301100	27331193	108732	83904.1	72080.5	116103	68251.3	97493.8	84212.9	59287.8
chr15	77685154	77685463	Myh9	chr15	-	77591018	77672545	246253	584307	350116	398810	298297	426061	416801	199912
chr15	77652348	77652851	Myh9	chr15	-	77591018	77672545	246253	584307	350116	398810	298297	426061	416801	199912
chr15	77685924	77686281	Myh9	chr15	-	77591018	77672545	246253	584307	350116	398810	298297	426061	416801	199912
chr4	135049497	135049914	Nipal3	chr4	-	135004815	135050419	41455	31286.5	29483.3	28365.6	21187.1	30251	27748	30988.4
chr4	135043007	135043403	Nipal3	chr4	-	135004815	135050419	41455	31286.5	29483.3	28365.6	21187.1	30251	27748	30988.4
chr5	139956932	139957262	Zfand2a	chr5	-	139947169	139960445	19155	55643.2	29297	51927.6	30287.5	43239.7	32554.5	21928.4
chr3	51335769	51336317	Setd7	chr3	-	51319239	51364745	51216	47107.4	39145.4	34918.2	30633.3	43711.6	36798	38612.5
chr9	107551083	107551694	Gnai2	chr9	-	107516468	107537673	88010	114269	73445.3	105004	64299.7	91712.6	84539.4	48109.7
chr14	62314489	62314878	Dleu2	chr14	-	62221672	62301210	114874	69123.6	100047	95809.1	108246	154362	127435	88069.8
chr14	3108339	3108612	Dleu2	chr14	-	62221672	62301210	114874	69123.6	100047	95809.1	108246	154362	127435	88069.8
chr14	62307553	62308205	Dleu2	chr14	-	62221672	62301210	114874	69123.6	100047	95809.1	108246	154362	127435	88069.8
chr14	62313565	62313960	Dleu2	chr14	-	62221672	62301210	114874	69123.6	100047	95809.1	108246	154362	127435	88069.8
chr7	53987824	53988203	Saa4	chr7	-	53983368	53987913	48693	143251	88592.9	141173	79497.7	113323	139068	58055.4
chr14	57720375	57720878	Gjb2	chr14	-	57717438	57723539	211493	372315	145032	190741	98577.5	140453	157016	77595.5
chr14	57703235	57703645	Gjb2	chr14	-	57717438	57723539	211493	372315	145032	190741	98577.5	140453	157016	77595.5
chr14	57708851	57709271	Gjb2	chr14	-	57717438	57723539	211493	372315	145032	190741	98577.5	140453	157016	77595.5
chr14	57707863	57708264	Gjb2	chr14	-	57717438	57723539	211493	372315	145032	190741	98577.5	140453	157016	77595.5
chr19	55163866	55164351	Gpam	chr19	-	55144223	55173937	89816	48757.5	59582.2	102880	85884.8	122309	60744.2	63553.9
chr19	54848052	54848370	Gpam	chr19	-	55144223	55173937	89816	48757.5	59582.2	102880	85884.8	122309	60744.2	63553.9
chr19	55193943	55194468	Gpam	chr19	-	55144223	55173937	89816	48757.5	59582.2	102880	85884.8	122309	60744.2	63553.9
chr19	55177707	55178158	Gpam	chr19	-	55144223	55173937	89816	48757.5	59582.2	102880	85884.8	122309	60744.2	63553.9
chr5	92706157	92706428	Naaa	chr5	-	92686685	92707207	24734	40001.5	22596.3	34731.4	20803.6	29625.4	22390.8	21042.8
chr3	134934966	134935204	Cenpe	chr3	+	134875526	134936504	15577	14036.9	24640.8	10468.9	19354.8	27558.5	26213.9	29129.9
chr10	60255160	60255466	Unc5b	chr10	-	60225342	60294329	82328	125289	67401	78224.4	54523.2	77620.6	69020.7	58327.8
chr2	179917290	179917441	Lama5	chr2	-	179911077	179960564	59237	140138	68054.2	86330.3	58873.2	83786.4	70074.4	45611.1
chr7	35444658	35445055	Kctd15	chr7	-	35424035	35437860	32989	28285.4	21101	22691.1	22765.5	32385.7	22545.7	11880.8
chr15	78423921	78424228	Cyth4	chr15	+	78427476	78452449	35483	43968.5	34861.3	41328.2	28082.2	39945.3	32779.8	31060.8
chr4	132047756	132048389	Sesn2	chr4	-	132048721	132066371	59783	75953.2	38389.5	75189.4	36548.5	51974.3	42784.6	26302.6
chr8	124906978	124907402	Zc3h18	chr8	+	124900515	124941260	72551	59743.7	59756.6	78851.4	55480.4	78878.4	64255.7	52241.5
chr9	55137445	55137957	Nrg4	chr9	-	55068028	55131432	53853	114238	140620	50824.4	63814.4	90695.6	72448.8	87724.6
chr9	55112690	55113061	Nrg4	chr9	-	55068028	55131432	53853	114238	140620	50824.4	63814.4	90695.6	72448.8	87724.6
chr7	86989103	86989589	Anpep	chr7	-	86966688	86987238	82085	76223.6	57098.4	79906.3	49883.1	70869.7	53673.1	46677.6
chr11	69184393	69184682	Chd3	chr11	-	69156774	69182928	93721	82613.6	74630.1	122490	75651.9	107479	67330.3	60005.4
chr4	136434908	136435178	C1qb	chr4	-	136436060	136442092	11341	8004.44	8858.86	12179.9	6638.42	9429.46	6428.2	10147.5
chr11	4017316	4017619	Sec14l2	chr11	-	3997042	4018732	232251	78300.9	117835	303050	143553	203866	120236	86351.1
chr11	53598595	53598988	Gm12216	chr11	-	53598990	53672758	81073	56503.3	60478.2	64912.2	52162.6	74057.7	59737.4	71423.9
chr11	115273858	115274807	Atp5h	chr11	-	115277010	115281233	33760	24944.7	13859.2	18778.5	14563.1	20670.7	12226.7	11354.2
chr5	148135029	148135355	Prhoxnb	chr5	-	148126559	148134016	55546	46447.6	37555.8	28307.8	31833.5	45179.5	45340.3	27900.7
chr17	66183925	66184193	Ppp4r1	chr17	+	66132694	66191266	41371	43131.2	53911.7	54677.6	43076.7	61131.9	52955.5	54746.4
chr5	101063090	101063435	Coq2	chr5	-	101083744	101103275	28619	32710.4	22436.7	23748.2	19964.3	28321.5	22686.9	17280.8
chr5	74485635	74486056	2700023E23Rik	chr5	+	74489107	74490361	637	452.935	881.085	952.804	1775.44	2517.95	613.097	880.34
chr9	64871364	64871820	Ptplad1	chr9	-	64834789	64869524	106041	141631	93261.6	127172	63065.1	89439	89125.6	70835.3
chr9	64850038	64850379	Ptplad1	chr9	-	64834789	64869524	106041	141631	93261.6	127172	63065.1	89439	89125.6	70835.3
chr9	64870321	64870680	Ptplad1	chr9	-	64834789	64869524	106041	141631	93261.6	127172	63065.1	89439	89125.6	70835.3
chr5	120981653	120982097	Slc24a6	chr5	+	120961200	120984033	234655	107177	107387	132119	84543.6	119889	126312	118833
chr9	70505249	70505914	Fam63b	chr9	-	70446820	70504981	56321	53503	49556.8	51088	48086.3	68187.6	54519.2	45913.1
chr17	25910360	25910958	Narfl	chr17	+	25910720	25920277	49079	31114.9	24430.7	43052.2	25759.5	36520.1	27058.6	15692.7
chr10	118264909	118265205	Dyrk2	chr10	-	118296404	118305959	43023	14093.8	21572.8	22917.7	18701.3	26509.5	19423.8	23955.3
chr10	118143096	118143442	Dyrk2	chr10	-	118296404	118305959	43023	14093.8	21572.8	22917.7	18701.3	26509.5	19423.8	23955.3
chr10	118159190	118159639	Dyrk2	chr10	-	118296404	118305959	43023	14093.8	21572.8	22917.7	18701.3	26509.5	19423.8	23955.3
chr5	123768151	123768495	Bcl7a	chr5	+	123794456	123824092	70734	28511.2	44823.7	40084.4	38156.6	54080	53080.8	42484.7
chr1	74055550	74055972	Tns1	chr1	-	73956804	74171021	621902	743774	535598	837365	481286	682036	525833	404511
chr2	11518386	11518828	Rbm17	chr2	-	11507065	11524826	12808	30995	24857.1	23385.6	24318.6	34459.4	27202.3	22182.1
chr7	36538492	36538788	Dpy19l3	chr7	-	36470518	36539473	50078	51365.6	46663.6	32519.3	42834.9	60672.2	57024.3	46226.3
chr7	36528181	36528601	Dpy19l3	chr7	-	36470518	36539473	50078	51365.6	46663.6	32519.3	42834.9	60672.2	57024.3	46226.3
chr12	25311145	25311662	Klf11	chr12	+	25336235	25347647	15473	17115.6	19554.9	14522.7	11107.1	15726.8	16001.5	19441.7
chr4	151384430	151384767	Klhl21	chr4	+	151382999	151391786	114725	96563.9	47230.4	75521.9	35971.6	50915.7	50046.7	39115.8
chr7	135075278	135075688	Prss8	chr7	-	135069230	135073627	31789	15649.1	14551.8	24608.2	14541	20579.5	16129.3	10305.2
chr11	22394943	22395223	Tmem17	chr11	+	22412285	22419234	14408	12448.9	8425.18	10692.4	7426.42	10508.3	9145.62	5507.9
chr11	22558967	22559292	Tmem17	chr11	+	22412285	22419234	14408	12448.9	8425.18	10692.4	7426.42	10508.3	9145.62	5507.9
chr11	22337398	22338313	Tmem17	chr11	+	22412285	22419234	14408	12448.9	8425.18	10692.4	7426.42	10508.3	9145.62	5507.9
chr10	127648717	127649165	Spryd4	chr10	-	127646965	127648850	62238	100001	54117.4	67315.6	50106.8	70893	52383.2	37800.6
chr5	114334564	114334991	Coro1c	chr5	-	114292447	114358715	84692	87203.4	71865.2	74158.1	66839.8	94536.3	78681.3	64736.9
chr12	77636185	77636758	Plekhg3	chr12	+	77634546	77680026	125231	89147.8	95346.4	104953	72383.6	102346	101472	84206.8
chr12	77637126	77637513	Plekhg3	chr12	+	77634546	77680026	125231	89147.8	95346.4	104953	72383.6	102346	101472	84206.8
chr9	20667301	20667836	A230050P20Rik	chr9	+	20673085	20678751	19989	22950.2	27419.2	55926.3	27875.9	39411.6	31812	17170.2
chr17	85424275	85424687	Slc3a1	chr17	+	85427686	85463581	58069	98827.9	102290	164433	91368.4	129161	137754	80641.2
chr17	85457253	85457522	Slc3a1	chr17	+	85427686	85463581	58069	98827.9	102290	164433	91368.4	129161	137754	80641.2
chr17	85444948	85445309	Slc3a1	chr17	+	85427686	85463581	58069	98827.9	102290	164433	91368.4	129161	137754	80641.2
chr17	85437303	85437669	Slc3a1	chr17	+	85427686	85463581	58069	98827.9	102290	164433	91368.4	129161	137754	80641.2
chr17	85455954	85456563	Slc3a1	chr17	+	85427686	85463581	58069	98827.9	102290	164433	91368.4	129161	137754	80641.2
chr8	123026032	123026477	Gse1	chr8	+	123012765	123105283	298042	194551	181653	310699	188736	266704	209500	142481
chr8	122940179	122941204	Gse1	chr8	+	123012765	123105283	298042	194551	181653	310699	188736	266704	209500	142481
chr8	123067488	123067776	Gse1	chr8	+	123012765	123105283	298042	194551	181653	310699	188736	266704	209500	142481
chr8	123024658	123025251	Gse1	chr8	+	123012765	123105283	298042	194551	181653	310699	188736	266704	209500	142481
chr11	2999900	3004962	Pisd-ps1	chr11	+	3024023	3031947	32713	26915.6	29263.5	29231	27737.7	39185.8	23628.3	23128.4
chr11	3022503	3022933	Pisd-ps1	chr11	+	3024023	3031947	32713	26915.6	29263.5	29231	27737.7	39185.8	23628.3	23128.4
chr7	27909366	27909962	Cyp2f2	chr7	+	27904973	27918679	124066	42576.5	69492.7	60556.7	51080.6	72159.1	57573.5	90609.3
chr7	27884620	27884942	Cyp2f2	chr7	+	27904973	27918679	124066	42576.5	69492.7	60556.7	51080.6	72159.1	57573.5	90609.3
chr8	13648900	13649393	Rasa3	chr8	-	13567217	13677587	146239	124233	111909	101312	98424.8	139030	106134	123971
chr15	102487148	102487618	Atp5g2	chr15	-	102493298	102501478	40249	56289.1	32382.2	41167.4	29844.3	42154.8	33472.8	18279.1
chr11	84794227	84794626	Car4	chr11	+	84771255	84779556	1653	2752.43	4386.75	3544.8	2170.75	3064.6	3902.53	5349.84
chr5	116470571	116471065	Prkab1	chr5	-	116463598	116474437	40425	80238.5	40522.1	59974	34160.9	48221.7	38174.9	29608.7
chr14	64056931	64057226	Fam167a	chr14	+	64055230	64084339	13376	14317.6	18278.6	13637.6	12803.9	18058.4	14852	23953.7
chr8	28351079	28351668	Adrb3	chr8	-	28336247	28340060	5741	5078.6	4408.11	6006.3	3702.79	5222.21	5384.21	3653.55
chr14	104725700	104726028	Pou4f1	chr14	-	104861540	104867216	473	2447.82	1601.67	1654.2	1537.25	2166.62	1582.34	1181.5
chr14	104735951	104736388	Pou4f1	chr14	-	104861540	104867216	473	2447.82	1601.67	1654.2	1537.25	2166.62	1582.34	1181.5
chr15	89206504	89207018	Tymp	chr15	-	89202361	89207468	73935	103573	53990.5	143973	72741.3	102455	57351.8	24169.1
chr11	70638257	70638734	A430084P05Rik	chr11	-	70604433	70626063	9838	6520.42	11984.7	10482.4	7862	11067.1	10623.3	16185.6
chr7	31760413	31760817	Fam187b	chr7	+	31762061	31774744	8025	19870.6	25124.1	19504.4	13927	19604.1	18940.3	17753.8
chr5	110503378	110503692	Plcxd1	chr5	+	110528987	110534971	36345	60751.9	28390.3	41270.5	24617.3	34650.9	30706.3	10675.8
chr2	27249442	27249932	Vav2	chr2	-	27119154	27282345	329120	220740	257404	336170	221013	311022	265674	240935
chr2	27271913	27272289	Vav2	chr2	-	27119154	27282345	329120	220740	257404	336170	221013	311022	265674	240935
chr2	27166316	27166803	Vav2	chr2	-	27119154	27282345	329120	220740	257404	336170	221013	311022	265674	240935
chr7	52790893	52791415	Plekha4	chr7	+	52781699	52809599	32805	13715.9	16319.3	16082	12112.5	17043.6	12804.5	19135.2
chr7	52782012	52782509	Plekha4	chr7	+	52781699	52809599	32805	13715.9	16319.3	16082	12112.5	17043.6	12804.5	19135.2
chr16	18533170	18533713	Gnb1l	chr16	+	18498860	18566772	50741	37315.7	38488.8	35797.5	31682.9	44550.8	34905	41889.5
chr4	133187426	133187875	Zdhhc18	chr4	-	133162906	133189344	48088	46573	43358.2	62982.3	32595.4	45831.4	43076	36465.8
chr2	172273823	172274230	2410001C21Rik	chr2	+	172266077	172295399	60060	65853	56224.7	128313	49071.2	68940.2	53291.4	43624.9
chr8	46150767	46151178	AY512931	chr8	-	46146055	46150772	5901	2901.75	5087.8	3390.22	2722.4	3824.11	4838.19	5912.63
chr8	46149845	46150159	AY512931	chr8	-	46146055	46150772	5901	2901.75	5087.8	3390.22	2722.4	3824.11	4838.19	5912.63
chr11	68678142	68678928	Ndel1	chr11	-	68634948	68666633	94273	167378	71439	120907	68373.4	96030.9	77248	53419.5
chr11	68638886	68639234	Ndel1	chr11	-	68634948	68666633	94273	167378	71439	120907	68373.4	96030.9	77248	53419.5
chr1	184890018	184890425	Tlr5	chr1	+	184884918	184906175	39277	29372	34624.3	36804	35755.3	50215.3	33135.5	36507.4
[truncated: 12,835 more rows]

## Sheet: FOXA2_A-overlap
			NB: UNFILTERED PEAKS
chr.x	start.x	end.x	feature	chr.y	strand	start.y	end.y	X0_pol_body	X3_pol_body	X8_pol_body	X16_pol_body	X24_pol_body	X36_pol_body	X48_pol_body	X168_pol_body
chr1	184120169	184120693	Vmn1r1	chr1	-	184087308	184088229	1	65.9035	251.067	169.064	1	373.317	292.423	231.026
chr11	74188117	74188521	Olfr412	chr11	+	74178172	74179111	1	312.378	254.082	335.684	1	373.317	242.95	409.473
chr10	81427954	81428447	Zfp781	chr10	-	81364655	81393225	1	94.5725	1	57.5833	1	187.158	1	1
chr1	13995299	13995800	Gm5523	chr1	-	13775765	13777010	1	94.5725	63.1236	1	2.57915	94.0792	106.447	1
chr1	88366861	88367262	1700019O17Rik	chr1	+	88322903	88324624	5193	1685.31	827.742	1064.28	241.557	947.051	1026.58	473.947
chr11	117706299	117706774	Birc5	chr11	+	117710550	117717057	3305	2325.98	3157.51	2251.33	1793.86	6685.92	4884.78	2540.85
chr11	100192161	100192522	Gast	chr11	+	100195725	100198310	1	701.002	537.046	882.496	357.361	1211.03	146.17	621.613
chr1	88409218	88409484	Ptma	chr1	+	88423310	88427273	31019	23707.5	17025	27631	11423	35936.8	21640.7	9623
chr11	106909273	106909538	1810010H24Rik	chr11	+	106889536	106891756	4351	2295.72	4563.16	5191.01	2614.75	5723.08	4012.67	6154.3
chr11	83375862	83376377	Ccl9	chr11	-	83386418	83392138	6585	2177.06	5494.09	4675.5	3597.77	7738.02	6866.6	5436.77
chr10	110144417	110145023	E2f7	chr10	+	110182520	110224440	18409	19370.5	23360.5	15531.1	15311.4	30741.9	23947.9	26906.6
chr11	113559280	113559958	Cpsf4l	chr11	-	113559484	113571331	30681	21303.7	17019.7	19808.8	11228.5	22256.1	15054.3	15654.4
chr10	79164051	79164548	Bsg	chr10	+	79167102	79174724	29839	45326.3	37373.4	90418	31540	62149.7	40097.5	18773.3
chr1	74766900	74767195	Cyp27a1	chr1	+	74760147	74784464	67574	46536.4	48993	85285.5	57198.5	109797	66256.3	52912.4
chr1	51606130	51606537	Obfc2a	chr1	-	51526331	51535243	97776	197706	64643	84545.9	43828.4	82925.4	67582.7	44621.5
chr11	112799285	112799733	Serpina1e	chr12	-	105185141	105195107	15038	94943.7	56882.9	47584.7	45477.8	82879.6	64709.6	17055.8
chr1	9937506	9938032	Snhg6	chr1	-	9932105	9934199	43846	96640.3	36362.7	59432	24399.6	44340.3	36246.2	15948.5
chr1	6031874	6032232	Npbwr1	chr1	-	5903787	5907479	1181	3743.9	1781.48	1270.15	1169.31	2022.8	2166.27	1576.24
chr1	115272258	115272681	Dsel	chr1	-	113755278	113761495	1335	3846.63	3706.53	3671.93	2801.62	4727.06	3966.81	3062.89
chr11	97761012	97761461	Fbxo47	chr11	-	97715620	97745468	20025	6989.08	13824.7	12718.3	12881.8	21111.7	15207.7	14392.4
chr10	84652580	84653023	Cry1	chr10	-	84594444	84647799	23304	30639	27302.4	72690.6	28397.8	45930.2	21501.3	26612.1
chr10	10299447	10300136	Igsf8	chr1	+	174242537	174249966	12129	8257.68	6712.84	8200.28	5443.8	8731.37	7021.88	7083.14
chr1	174240088	174240604	Igsf8	chr1	+	174242537	174249966	12129	8257.68	6712.84	8200.28	5443.8	8731.37	7021.88	7083.14
chr11	118995176	118995583	Cbx4	chr11	-	118938884	118947551	92615	54780.4	43989.3	74923.1	38541.2	61143	54365.3	34407.2
chr10	7947753	7948248	Tmem37	chr1	-	121963953	121970357	19593	55685	25006.2	62804.9	29799.5	47100.2	24248	16525.9
chr11	102072317	102072798	Hdac5	chr11	-	102057060	102091486	118243	112250	68314.3	121575	70931.9	109469	83915.7	51798.5
chr11	59333587	59334088	Zkscan17	chr11	-	59299022	59320142	50979	40056	34635.3	52136.6	31953.2	48933.2	35225.7	28379.9
chr11	87805034	87805769	Dynll2	chr11	-	87793026	87811800	67588	73819.4	40617.9	83190.7	40153.5	60609.7	53960.5	29452.3
chr10	68751431	68751993	Rhobtb1	chr10	+	68675404	68754532	219016	196114	110730	214042	120753	182032	100172	118886
chr10	77621832	77622433	D10Jhu81e	chr10	-	77624811	77632513	58047	69451.3	35969.1	60493.1	32330.4	48061.1	40366.9	24372.1
chr1	21258828	21259221	Gsta3	chr1	+	21230669	21255640	354688	27682.1	141277	237807	269256	399155	157029	238920
chr10	95180013	95180332	Nudt4	chr10	-	95009640	95026801	46023	80937.3	48823.5	53407.2	37078.6	54875	48801.9	43199.7
chr1	157884542	157884896	Tor1aip1	chr1	-	157851728	157883610	76247	126235	75445.8	101292	69295.9	101532	84065.2	57653.5
chr11	63675542	63676027	Hs3st3b1	chr11	-	63698194	63735786	171671	223004	155396	225145	144459	211589	181353	124650
chr12	82032309	82032985	Mafg	chr11	-	120489666	120494861	170345	67695.8	49349.8	121602	66688.4	96664.5	58587.9	44121.9
chr11	120492733	120493008	Mafg	chr11	-	120489666	120494861	170345	67695.8	49349.8	121602	66688.4	96664.5	58587.9	44121.9
chr11	48896997	48897576	Ifi47	chr11	+	48900556	48910473	16993	8048.24	21814.5	39590.8	23963.5	34344.2	24702.3	12897
chr1	74061055	74061666	Tns1	chr1	-	73956804	74171021	621902	743774	535598	837365	481286	682036	525833	404511
chr11	22524546	22525112	Tmem17	chr11	+	22412285	22419234	14408	12448.9	8425.18	10692.4	7426.42	10508.3	9145.62	5507.9
chr11	22864342	22864742	Commd1	chr11	-	22799727	22882284	81431	122123	97936.3	143560	101131	142744	95231.8	97003.4
chr11	105915302	105915596	Ak7	chr12	+	106944191	107020657	58293	49313.7	59410.9	54394.4	43406	60936.2	64361.5	62098.5
chr1	132725228	132725675	Pigr	chr1	+	132723260	132748826	33779	11513.6	33960.4	56766.6	36588.8	50278.3	38356.6	41592.9
chr11	86775107	86775900	Ypel2	chr11	-	86749926	86807264	58161	95691.5	66815.8	117982	68721.6	93747	83387.8	63276.9
chr12	105191281	105191625	Sgsm2	chr11	-	74662765	74710582	44841	38216	31433.9	43504.9	35887.4	48543.3	34640.3	31226.3
chr1	75648971	75649462	Slc4a3	chr1	+	75542840	75556006	14869	18238.1	9538.03	8122.03	8637.36	11637.4	10536.3	7673.39
chr11	93594978	93595314	Utp18	chr11	-	93720556	93747080	18235	47866.7	26203.2	35338.1	23260	31124.9	28194.7	18721.7
chr10	80426257	80426620	Gng7	chr10	-	80411368	80477670	66317	80727.4	46102	43481.3	42187.1	55874.8	46667.7	45345.7
chr11	87262110	87262798	Tex14	chr11	+	87218566	87369325	687469	440634	491030	402196	460291	606133	464721	532487
chr1	181766535	181766959	Ahctf1	chr1	-	181675034	181734146	47744	97051.7	60115.6	93530.8	70213.1	91973.2	69627.7	52234.4
chr10	60985012	60985285	Lrrc20	chr10	+	60938580	61044976	107381	67223.5	74010.7	70571.2	65446.7	85106.3	70513.5	73768.7
chr11	115274947	115275279	Dcaf7	chr11	+	105898185	105920637	21799	16136.5	27583.2	26497.6	22033.8	28619	27046.7	28655.3
chr1	39634273	39634712	Rnf149	chr1	-	39608143	39634192	28696	64823.7	33971.4	44761.5	29926.4	38746	33119.6	26909.1
chr1	39635161	39635599	Rnf149	chr1	-	39608143	39634192	28696	64823.7	33971.4	44761.5	29926.4	38746	33119.6	26909.1
chr10	75344816	75345377	Derl3	chr10	+	75356142	75358686	6332	8266.84	5510.48	17823.8	6157.05	7936.38	6129.19	3039.59
chr1	87481764	87482167	Sp110	chr1	-	87473474	87500466	22185	13662.6	22818.9	12902	14412	18523.8	21810.8	29028.4
chr1	87435334	87435754	Sp110	chr1	-	87473474	87500466	22185	13662.6	22818.9	12902	14412	18523.8	21810.8	29028.4
chr1	87495650	87496220	Sp110	chr1	-	87473474	87500466	22185	13662.6	22818.9	12902	14412	18523.8	21810.8	29028.4
chr10	77362935	77363385	Lrrc3	chr10	-	77360319	77365281	74223	16388.9	38695.8	82879.4	58417.9	75000.3	47425	32524.1
chr10	25255811	25256263	2010003K15Rik	chr10	-	25247748	25256078	92265	64190.6	55995	71615.7	44153.2	56440.9	45676.5	51331.4
chr11	51665354	51666170	Phf15	chr11	-	51626957	51670983	90819	79933.9	77824.1	185576	65236.4	83254.6	84881.4	64790.6
chr11	96185799	96186222	Hoxb3	chr11	+	96184439	96209244	16325	14485.6	15612.9	12475.3	13064	16662.2	15215.3	17510.9
chr11	54750223	54750655	Tnip1	chr11	-	54724288	54776442	80292	75706.4	69182.2	83152.7	58083.4	74042.8	67397.1	62067.7
chr1	188232726	188233253	Lyplal1	chr1	-	187911610	187941189	20720	31396.8	21667.9	24047.2	19931.2	25305.9	20132.3	16245.9
chr11	70492044	70492536	Camta2	chr11	-	70482964	70501607	78507	48111.2	52158.6	87793.3	54601.9	69176.4	55469.6	37176.6
chr10	79447483	79447961	ORF61	chr10	-	79439864	79447075	21274	57434.6	26557.5	43062.6	29405.3	37235	24951.5	14458.5
chr11	107727632	107728011	Cacng5	chr11	-	107735918	107776369	17229	17147.9	18633.4	13964.6	14284.7	17890.5	17529.7	21822.3
chr11	120408836	120409191	Fam195b	chr11	-	120404201	120411041	58607	67358.9	34707.5	63971.9	28329.3	35358.5	35614.6	21549.8
chr11	66858360	66858953	2310004I24Rik	chr11	-	66851381	66866120	136486	45559.7	45424.5	59962.7	56066.8	69933.6	53994.1	41833.3
chr11	100731583	100731929	Stat5a	chr11	+	100720664	100746483	44065	92488.9	64096	91297.3	52078.9	64460.6	73008.9	45190.1
chr11	3357731	3358204	8430429K09Rik	chr11	+	3352439	3379834	21787	12613.4	21092.1	20334.4	18200.7	22433.1	18449.5	21945.4
chr1	9812884	9813378	Sgk3	chr1	+	9788210	9892649	44960	26683.9	56679.1	40166.5	52496.4	63667.2	59394.3	65531.4
chr11	106253963	106254367	Icam2	chr11	-	106238969	106243955	9967	5403.12	4382.81	5090.85	6007.55	7245.92	4618.63	4000.88
chr1	134973555	134973878	Pik3c2b	chr1	+	134942588	135005265	81893	48838.7	51259.4	47236.7	46805.1	56452.8	47108.3	54017.2
chr12	81945048	81945500	4933426M11Rik	chr12	+	81891545	81981820	53012	85466.6	113262	83780.9	99641.3	119684	124688	104277
chr11	70544002	70544680	Kif1c	chr11	+	70514049	70545472	103324	46272.4	76027.2	116901	81128.4	96890.7	85699.3	57700.1
chr11	59236366	59236967	Snap47	chr11	-	59220651	59263458	67193	64685.9	70712.1	82137.3	68924.8	82131.6	72027.7	65855.4
chr11	72381958	72382377	Spns3	chr11	-	72311657	72363748	28052	28174.3	27886	21208.7	22664.9	26822.7	22320	35199.6
chr1	23487575	23487990	Ogfrl1	chr1	-	23373262	23390014	13911	18525.2	11736.7	14882.4	9583.01	11339.9	13756.8	12401.6
chr10	114749463	114750051	Rab21	chr10	-	114726917	114752647	26186	56343.6	41825.5	53810.3	37648.9	44477.6	45515	34493.3
chr1	74305534	74305921	Arpc2	chr1	+	74283123	74314787	20075	20211.5	41887.8	36141.6	32291.4	37976.9	40178.4	44097.4
chr1	134234667	134235122	Nuak2	chr1	+	134212701	134230065	27509	28188.2	37831.2	63521.9	43081.5	50451.8	39735.7	32917.2
chr10	60600201	60600621	Sgpl1	chr10	-	60561389	60610413	46736	57095.4	45907.7	71534.6	46225.3	53917.1	53504.8	43790.4
chr1	23170260	23170716	4933415F23Rik	chr1	-	23107312	23109092	3069	1041.45	552.118	512.176	640.555	745.633	425.315	627.021
chr1	91410126	91410508	Agap1	chr1	+	91351385	91791857	400021	379531	380315	420687	354752	412621	344800	374271
chr10	111373940	111374200	Krr1	chr10	+	111409750	111425486	3788	7248.69	11426.5	9324.97	8475.5	9808.27	10880.8	12090.9
chr1	169236560	169236816	Tmco1	chr1	+	169238800	169264109	7789	5085.77	13866.8	12613.1	15356.1	17742.5	12629.3	16117.4
chr1	137065934	137066783	Gpr37l1	chr1	-	137056826	137064258	5901	4731.79	3657.25	3188.21	3230.62	3724.17	4119.57	3674.76
chr1	137065934	137066783	Gpr37l1	chr1	-	137056826	137064258	5901	4731.79	3657.25	3188.21	3230.62	3724.17	4119.57	3674.76
chr11	79099949	79100174	Wsb1	chr11	-	79052883	79068197	49414	136300	74347.8	68037.5	57357.5	65985	84363.9	45589
chr11	120842023	120842483	Csnk1d	chr11	-	120823054	120852647	61538	91059	69577.1	95044.1	63665.9	73107.1	77258.5	52469.4
chr1	184504795	184505336	Capn8	chr1	+	184495137	184562483	46493	29658.7	44268.4	48710.3	33619.7	38482.4	36870.9	44382.7
chr11	3655396	3655890	Osbp2	chr11	-	3603733	3763906	114933	82631.1	75535.1	61339	63879.1	72753.4	72849.6	78720.7
chr11	101087552	101087833	Ezh1	chr11	-	101052428	101087764	28117	23991.4	34205.3	33274.2	26726.5	30331.8	27173.8	28334.6
chr1	157673017	157673444	Qsox1	chr1	-	157625284	157660029	90221	802728	406694	520776	281550	318819	393851	132729
chr1	63223107	63223620	Ndufs1	chr1	-	63190165	63223396	24325	28555.8	27906.2	23293.8	26675.4	30160.2	27500.2	28156.5
chr12	33366601	33367173	Nampt	chr12	+	33505199	33538234	29912	36723.2	33588.4	42482.3	32518.3	36464.4	29831.6	39534.7
chr11	100835502	100836016	Ptrf	chr11	-	100818050	100831931	12942	23156.4	15062.1	15240.9	13209.3	14761.3	15544.3	13227.7
chr1	192704559	192704880	Rps6kc1	chr1	-	192596757	192735649	112228	90833.7	105394	97042.6	95376.3	105660	101001	115200
chr1	194491561	194492121	Hhat	chr1	-	194336709	194597413	129565	86633.6	127566	93937.5	101690	112631	120872	149120
chr12	26470500	26471239	Serpina1c	chr12	-	105133135	105143160	32262	20033.1	36062.1	35678.6	38718.3	42759.8	28699.5	23408.8
chr12	105139230	105139620	Serpina1c	chr12	-	105133135	105143160	32262	20033.1	36062.1	35678.6	38718.3	42759.8	28699.5	23408.8
chr1	129629032	129629289	Acmsd	chr1	+	129625989	129664141	45327	15253.3	46384.3	22624.5	63181.7	69718.5	38919.9	56701
chr1	95024774	95025735	Agxt	chr1	+	95031852	95041998	36458	22102	24786.1	72764.7	52684.5	58120.2	36433.2	15819.1
chr12	81317308	81317901	Actn1	chr12	-	81268528	81361358	153333	124736	119851	127714	98339.5	108286	116213	119991
chr1	75209135	75209483	Stk16	chr1	+	75207403	75212181	48617	22495.8	38482.4	77165.2	44496.7	48771.4	34677.5	30423.1
chr10	5731954	5732245	Esr1	chr10	-	5342779	5734495	143617	91475.1	161615	117073	163964	179369	152973	200810
chr1	123247249	123247546	Insig2	chr1	-	123202098	123229157	145913	168447	128675	345370	170190	185072	101178	59000.8
chr10	125163291	125163550	Lrig3	chr10	+	125403274	125452415	67316	23470.2	52056.3	42030.4	47693.1	51724.8	48602.2	60260.4
chr1	71933329	71933800	Gm8883	chr1	+	71934685	71937778	10688	6028.66	8230.81	8505.59	3734.11	4045.37	6548.82	5938.42
chr11	84302549	84303016	Aatf	chr11	-	84236357	84327003	49904	47228.5	55552.5	54095.6	58529	63354.4	50769.7	58272.5
chr11	100677924	100678719	Stat5b	chr11	-	100642044	100711899	127203	103732	97836.3	118200	86279.3	93289.2	100956	111414
chr1	107850628	107851180	Zcchc2	chr1	+	107886982	107930654	93278	44355.6	59875.1	76161.9	65416.4	70194.1	65634.8	61430.5
chr1	107804932	107805515	Zcchc2	chr1	+	107886982	107930654	93278	44355.6	59875.1	76161.9	65416.4	70194.1	65634.8	61430.5
chr1	135560984	135561428	Zc3h11a	chr1	-	135516447	135557957	52772	36528.9	54597.6	54035.2	56532.1	60156.9	61329.5	47499.5
chr11	76562354	76562800	Gosr1	chr11	-	76540103	76577057	29436	52361.4	48034.5	49680.7	48405	51413.5	43608.3	42557.9
chr10	72312587	72312860	Zwint	chr10	+	72117642	72132537	5888	4771.21	9957.3	11538.7	8272.31	8771.04	8973.73	10454.5
chr11	89856783	89857266	Pctp	chr11	-	89844730	89864208	42831	55256.6	26216.4	63986.9	39373.1	41681.8	24055.2	27869.9
chr1	78646234	78646757	Acsl3	chr1	+	78654399	78704318	39790	12674.7	39516.5	46816.8	42042.7	44479.9	39038.7	45826.5
chr1	163017190	163017436	Cenpl	chr1	+	163001022	163016474	5429	1968.01	8649.03	6273.08	11557.7	12177.2	11133.6	9153.79
chr11	57237685	57238056	Fam114a2	chr11	-	57296491	57332146	35286	41029.2	34788.7	42560.6	31472.4	33105.5	31480.5	31414.8
chr11	99336125	99336771	Krt23	chr11	-	99339286	99354424	13297	5022.46	8278.39	3919.21	5809.63	6092.73	7508.67	9942.46
chr11	100176672	100177112	Eif1	chr11	+	100181309	100183410	27961	12273.7	11490.3	15344.7	11070.6	11558.1	9325.82	11468.6
chr1	134194945	134195506	Klhdc8a	chr1	+	134195202	134203934	17254	9927.65	12706.1	21579	12424.9	12907.7	14766.1	11107.1
chr1	121043247	121043833	Gli2	chr1	-	120730637	120950196	140421	131494	115498	81650.7	97600.2	101054	106965	130144
chr1	121113844	121114330	Gli2	chr1	-	120730637	120950196	140421	131494	115498	81650.7	97600.2	101054	106965	130144
chr10	74560956	74561513	Bcr	chr10	+	74523640	74647668	136645	102724	127021	142648	134478	139040	130558	134315
chr12	101757814	101758398	Ttc7b	chr12	-	101538979	101759032	185497	161501	188702	231480	194421	200952	180018	205693
chr12	81184714	81185225	Ttc7b	chr12	-	101538979	101759032	185497	161501	188702	231480	194421	200952	180018	205693
chr12	110087770	110088760	Slc25a47	chr12	+	110089338	110095025	1140205	940530	492526	432206	215626	222534	236029	330058
chr11	23104586	23104956	Xpo1	chr11	+	23156040	23197597	15843	10587	27599	18869.2	33922.2	35007.5	33739.3	26573
chr11	59850241	59850920	Pemt	chr11	-	59784118	59850341	284967	153836	188666	337530	196210	202408	156743	181698
chr10	116614889	116615177	Frs2	chr10	-	116507182	116585530	47691	59703.5	64357.6	64332.4	65040.6	67037.1	65358.5	67509.3
chr10	116518927	116519357	Frs2	chr10	-	116507182	116585530	47691	59703.5	64357.6	64332.4	65040.6	67037.1	65358.5	67509.3
chr1	46132665	46133139	Dnahc7b	chr1	+	46123582	46430395	11801	5896.07	21675.6	6686.98	18246.7	18803	17441.6	33179.7
chr1	88491913	88492427	Cops7b	chr1	+	88483674	88503075	10621	9586.41	18180.7	14778.4	16869.2	17369.8	18384.5	22923.3
chr11	48686271	48686929	Irgm1	chr11	-	48678750	48684848	17920	8695.68	12566.2	19370.3	14824.2	15134.8	14306	12426.6
chr11	78621116	78621526	1810012P15Rik	chr11	+	78640096	78657401	18173	11408.5	13035.4	12462.8	13298.7	13576.8	11202.9	14440.2
chr11	78627412	78627815	1810012P15Rik	chr11	+	78640096	78657401	18173	11408.5	13035.4	12462.8	13298.7	13576.8	11202.9	14440.2
chr10	120923294	120923817	Rassf3	chr10	-	120847406	120913306	201652	106471	124469	112116	105778	107337	116372	121556
chr11	106323713	106324085	Ern1	chr11	-	106258933	106349110	114835	107812	120317	108739	132673	134576	146855	109094
chr11	88522803	88523142	Msi2	chr11	-	88152883	88579543	244097	216588	264967	258304	245422	246665	248532	290366
chr11	88471993	88472546	Msi2	chr11	-	88152883	88579543	244097	216588	264967	258304	245422	246665	248532	290366
chr11	108815848	108816259	Axin2	chr11	+	108781662	108812095	68525	34105.6	42159.1	85565.6	49846.5	50041.7	49677.3	36492
chr1	75018100	75018548	Nhej1	chr1	-	75013919	75121800	62585	37969.6	56395.1	46580.9	51654.1	51741.2	58902.4	66093
chr10	22167943	22168375	Gm10825	chr10	+	22122618	22127276	1	1	32.9793	57.5833	1	1	1	102.494
chr10	103859524	103860033	Gm4340	chr10	+	103605568	103616547	1	1	31.7997	1	1	1	85.863	1
chr10	129172402	129172712	Olfr806	chr10	-	129175029	129175971	1	1	31.7997	1	1	1	85.863	1
chr1	158435915	158436437	Soat1	chr1	-	158358238	158404459	16329	14959.1	22612.3	17997.6	19102.6	19090.2	16984.4	33147.6
chr1	58885604	58885981	Casp8	chr1	+	58852217	58904347	12424	22342.1	29404.1	26770.4	30036.4	29982.8	31500	28307.1
chr1	121462104	121462677	Epb4.1l5	chr1	-	121441609	121545577	59070	53892	68176.7	73059.7	82415.7	82125.4	79541.1	70130.7
chr1	43455734	43456121	Nck2	chr1	+	43502595	43627363	57585	27573	51172.1	34886.9	52767.2	52574	47227.1	68684
chr10	116774473	116774833	Cpsf6	chr10	-	116781723	116814029	40298	40338.3	30172.9	32735.8	35081.5	34847.7	36478.4	24628.4
chr10	116780011	116780377	Cpsf6	chr10	-	116781723	116814029	40298	40338.3	30172.9	32735.8	35081.5	34847.7	36478.4	24628.4
chr10	116830022	116830170	Cpsf6	chr10	-	116781723	116814029	40298	40338.3	30172.9	32735.8	35081.5	34847.7	36478.4	24628.4
chr1	37687222	37687650	2010300C02Rik	chr1	-	37668520	37776656	59709	46526.9	49828	37283.6	44785.4	44399.8	46709.6	56533.4
chr12	49931730	49932005	Fam20a	chr11	-	109534239	109583570	180162	101749	102034	189064	116309	114783	110426	86679.3
chr12	29360684	29361386	Adi1	chr12	+	29360071	29367039	24148	3237.42	10350.6	15785.6	11900.4	11713	7823.21	12805.9
chr1	195068448	195069013	Hsd11b1	chr1	-	195047834	195090239	73397	14879	23913	25338.5	31958.5	31132.6	21176.3	35244.9
chr11	19891442	19891976	Spred2	chr11	+	19824444	19922600	108885	91561.9	84511	78498.9	87933	85485.1	79119.4	89156.3
chr12	92934700	92935278	Ston2	chr12	-	92871448	93024876	160245	95114.1	112944	117432	121756	118249	115468	129465
chr11	74675495	74675754	Ston2	chr12	-	92871448	93024876	160245	95114.1	112944	117432	121756	118249	115468	129465
chr1	89937028	89937544	Ugt1a10	chr1	+	89951985	90116577	312389	65053.8	189918	223125	263611	254914	179038	287635
chr10	75012572	75013100	AI646023	chr10	-	75012869	75023075	8969	13862.5	7252.43	6018.58	5592.76	5399.21	6651.73	6866.84
chr10	98818914	98819285	Dusp6	chr10	+	98725864	98730123	53895	32520.4	15590.8	36341.2	23414.5	22598.3	17062.1	12680.3
chr1	37113941	37114440	Tmem131	chr1	-	36849033	36996372	129431	97028.6	124115	124389	128709	124192	123330	126771
chr1	37119960	37120250	Tmem131	chr1	-	36849033	36996372	129431	97028.6	124115	124389	128709	124192	123330	126771
chr11	78011441	78011893	Proca1	chr11	+	78006893	78019265	14785	23525.1	19531	31048.4	20299.1	19555.6	22433.4	15917.3
chr1	140398201	140398469	Nek7	chr1	-	140381290	140516273	124350	349496	122098	165054	135307	130235	135878	111630
chr10	86442322	86442739	Stab2	chr10	-	86303954	86470687	176681	104295	199579	240186	236141	226724	197031	205472
chr11	106905631	106906049	Bptf	chr11	-	106894394	106993236	115835	67595.4	96308.5	84972	94436.2	90638.8	94797	104059
chr12	21574318	21574935	Bptf	chr11	-	106894394	106993236	115835	67595.4	96308.5	84972	94436.2	90638.8	94797	104059
chr11	83084911	83085285	Slfn14-ps	chr11	-	83088613	83100228	7081	2174.27	4548.35	2886.75	4724.49	4490.93	3650.11	7039.88
chr11	80410584	80410970	Myo1d	chr11	-	80295628	80593527	122985	101411	134693	108109	119267	113115	135125	151285
chr11	87868859	87869264	Srsf1	chr11	+	87861172	87867259	5369	6872.01	7806.43	8339.45	11864.9	11220.1	9063.65	6268.28
chr10	7571479	7572088	Zc3h12d	chr10	+	7552267	7590195	21005	25068.9	30248.8	26633.7	28251.4	26641.9	25330.6	35004.1
chr1	182967754	182968195	9130409I23Rik	chr1	+	182981367	182990798	2539	2433.89	3985.83	3169.67	3402.75	3195.45	4091.4	4583.64
chr1	133095603	133095899	Rassf5	chr1	-	133072986	133141755	129370	104213	97040	113710	102542	96083.9	89667.3	94397.8
chr10	83731935	83732086	Nuak1	chr10	-	83834063	83903216	47080	42631.1	45113.5	45454.5	46713.3	43544.5	41495.1	51164.1
chr10	83887236	83887462	Nuak1	chr10	-	83834063	83903216	47080	42631.1	45113.5	45454.5	46713.3	43544.5	41495.1	51164.1
chr1	54876189	54876539	Ankrd44	chr1	-	54702183	54983231	120855	66581.2	116838	80087.3	111977	103844	105866	147646
chr1	124523260	124523531	Ddx18	chr1	-	123450411	123464557	17870	23355.9	16212.8	20938.3	18346	16915.5	15278.5	13571.7
chr10	84272789	84273191	Rfx4	chr10	+	84218792	84369281	85905	61981.1	74195.4	58510.8	68963.7	63574.1	66202.5	94187.8
chr10	39344662	39345155	Traf3ip2	chr10	+	39332739	39375113	38764	31288.5	36701.7	36229	35039.1	32228.9	33603.2	40356.2
chr11	90400014	90400564	Stxbp4	chr11	-	90337806	90499422	51878	38503.1	60004.3	40033.1	64285.7	59043	57573.2	73307.8
chr1	173396912	173397332	F11r	chr1	+	173367691	173394724	33277	26924.4	35761.5	41380.3	34013.5	30954.4	32540.7	38489.8
chr10	41331803	41332135	Ccdc162	chr10	-	41258654	41307559	34457	35558.6	43555.4	60215.8	47382.8	43003.6	39945.9	47586.5
chr10	18068696	18068947	Nhsl1	chr10	+	18127480	18253697	69149	40517.9	77064.3	71465.7	74695.2	67722.2	78499.3	79258.9
chr11	115112888	115113053	Grin2c	chr11	-	115110482	115128557	15434	19038.4	11351.8	10323	7210.86	6530.66	11245.5	10291.4
chr1	180469707	180470251	Kif26b	chr1	+	180459255	180862988	167089	115093	176096	114905	150358	135562	152386	221073
chr10	44174583	44174976	Prdm1	chr10	-	44156980	44178493	10086	9836.07	10149	8249.64	9457.2	8516.6	8994.68	13150.3
chr10	44419909	44420447	Prdm1	chr10	-	44156980	44178493	10086	9836.07	10149	8249.64	9457.2	8516.6	8994.68	13150.3
chr1	40213964	40214385	Il1r1	chr1	+	40281924	40373022	104313	541515	490165	416881	251766	226336	429987	222461
chr1	40232557	40232985	Il1r1	chr1	+	40281924	40373022	104313	541515	490165	416881	251766	226336	429987	222461
chr10	120526334	120526739	Wif1	chr10	+	120471059	120537698	37525	19969	32440.5	21766.1	31778.2	28492	27390.8	37491.1
chr12	106991777	106992351	Papola	chr12	+	107022911	107077153	38630	25792.4	61269.7	54341.7	63449.3	56661.8	71707	53703.2
chr10	82417723	82418282	Upb1	chr10	+	74869778	74902940	91033	25132.2	85763.2	99531	106713	95082.5	92692.7	89673.3
chr10	74870417	74871014	Upb1	chr10	+	74869778	74902940	91033	25132.2	85763.2	99531	106713	95082.5	92692.7	89673.3
chr12	73682909	73683470	1810048J11Rik	chr12	+	73637343	73681200	17785	7483.62	15288.1	11731.6	15818.3	14072	14173.5	16764.6
chr11	77231631	77231900	Ssh2	chr11	+	77029926	77269050	93671	76928	120259	98816.2	133609	117694	125361	132490
chr1	133582889	133583149	5430435G22Rik	chr1	+	133585271	133610041	14397	7921.22	12132.7	9167.5	11286.9	9882.27	9008.04	16586.2
chr1	89921494	89921927	Usp40	chr1	-	89841695	89905126	54205	49548.3	60263.3	75083.7	75769.3	66253.5	59733.4	62773.2
chr1	136315959	136316461	Adipor1	chr1	+	136312043	136328918	13165	11496.5	18020.9	17447.2	17746.7	15423.9	18408.3	17865.3
chr1	157169268	157169631	Xpr1	chr1	-	157122786	157264574	46709	44161.3	67477	52645.9	74615.2	64501.4	68528.4	74202.9
chr1	85260375	85260771	C130026I21Rik	chr1	-	85242918	85267141	2361	1642.7	4601.69	1192.38	2269.97	1955.66	2672.2	8526.53
chr1	85325780	85326192	C130026I21Rik	chr1	-	85242918	85267141	2361	1642.7	4601.69	1192.38	2269.97	1955.66	2672.2	8526.53
chr1	85327999	85328551	C130026I21Rik	chr1	-	85242918	85267141	2361	1642.7	4601.69	1192.38	2269.97	1955.66	2672.2	8526.53
chr1	85248458	85248883	C130026I21Rik	chr1	-	85242918	85267141	2361	1642.7	4601.69	1192.38	2269.97	1955.66	2672.2	8526.53
chr10	20117253	20117650	Pde7b	chr10	-	20117809	20444874	137642	91498.6	159326	108128	161569	138061	142311	196049
chr10	20351809	20352216	Pde7b	chr10	-	20117809	20444874	137642	91498.6	159326	108128	161569	138061	142311	196049
chr1	162963886	162964590	Zbtb37	chr1	-	162947886	162964390	5429	1794.81	7246.14	4029.25	8030.18	6853	6599.73	8801.06
chr1	89560001	89560263	Inpp5d	chr1	+	89516886	89617083	57349	46284.4	71030.5	56383.7	62892.4	53636	61880.2	86661
chr12	80699427	80699848	Rad51l1	chr12	+	80398268	80915677	164965	101434	243469	173372	221919	189202	241266	293965
chr1	180247990	180248773	Fam36a	chr1	+	180249283	180252824	9022	6883.16	28322.4	29568.3	53817	45773.8	31288.4	22211.2
chr10	19906609	19907125	Mtap7	chr10	+	19868725	20001396	94439	74799.3	106639	138479	115639	98285.4	97931.9	115600
chr1	89668187	89668699	Atg16l1	chr1	+	89652645	89688997	38705	26652.1	42665.1	50794.8	46143.4	39194.2	45848	44097
chr11	32534094	32534510	Fbxw11	chr11	+	32542874	32646814	33277	32854.9	68835	59605.4	74077.8	62166.8	68134.8	72826.5
chr10	58528902	58529167	Sh3rf3	chr10	+	58276106	58601664	95581	83052.8	115962	70502.4	93159.2	77938.8	100786	147620
chr12	104972277	104972973	Serpina1b	chr12	-	104966365	104976399	77802	11477.4	32797.7	29871.7	32898.6	27438.4	22173.7	27756.4
chr11	106582926	106583160	Pecam1	chr11	-	106515531	106576595	59467	46577.4	49558.1	52386.3	51642	42799.5	44243.5	56835.3
chr1	173041467	173041757	1700009P17Rik	chr1	+	173051791	173057098	3153	4705.51	5966.44	8634.65	4683.17	3866.46	4923.78	6869.34
chr10	83467185	83467550	1500009L16Rik	chr10	+	83185609	83225507	20533	11260	15005.3	9127.77	12275.5	10113.4	11909.3	19529.9
chr1	71694406	71694879	Ust	chr10	-	7924550	8238623	64665	57644.1	105612	59409.6	95724	78723.1	92983.8	136804
chr1	153330974	153331277	Rnf2	chr1	-	153316535	153347953	18371	24047.6	23509.3	25785.7	24090.6	19793.3	27438.5	23828
chr1	60656069	60656554	Raph1	chr1	-	60540028	60623609	71016	119356	179794	128192	191397	156352	196961	105316
chr1	17003953	17004326	Jph1	chr1	-	16987544	17087879	27646	13168.1	25867.4	17959.8	26660.7	21770.8	27944.1	28036.3
chr10	58740530	58740780	P4ha1	chr10	+	58786043	58836052	28793	17526.9	35265.2	36185.9	50149	40813.9	40035.8	35185
chr1	180154932	180155321	Pppde1	chr1	+	180117547	180182728	9737	14688.7	29282.1	31203.9	35909.8	29151.6	24557.5	32525.4
chr10	86227099	86227455	BC030307	chr10	+	86168555	86239588	33574	30999	42568.8	42084.8	47906.6	38816.5	39270.6	46089.4
chr1	16189368	16189965	Rdh10	chr1	+	16095962	16122631	15346	7645.68	19307.6	16886.9	20844.7	16756.4	20162.3	23016.5
chr10	93522668	93523187	Fgd6	chr10	+	93498745	93608084	146828	73848.8	137505	149496	168937	135375	141058	149014
chr10	7905230	7905642	Tab2	chr10	-	7625445	7675921	20031	17365.7	35520.5	44633	43179.9	34390.7	38571.4	38489.8
chr1	57956078	57956533	Spats2l	chr1	+	57831704	58005241	60503	35899	72294.3	42331.3	68525	54412.6	63168.4	99449.7
chr1	43990268	43990626	Tpp2	chr1	+	43990851	44059816	23365	12553.7	40127.1	31503	54379.5	43037.2	42843.8	39884.1
chr1	43992548	43992833	Tpp2	chr1	+	43990851	44059816	23365	12553.7	40127.1	31503	54379.5	43037.2	42843.8	39884.1
chr1	163643055	163643363	Fasl	chr1	-	163710819	163718626	237	1829.05	2930.12	1694.65	3177.46	2514.14	2089.71	4137.73
chr11	85451654	85451948	Bcas3	chr11	+	85166665	85639560	241901	143346	248230	189516	262117	207066	224102	306577
chr10	55876819	55877251	D630037F22Rik	chr10	-	55734099	55948495	49894	24436.2	62400.5	42360.7	79801.4	62599.8	60488.5	78629.2
chr12	100078133	100078596	Eml5	chr12	-	100024813	100139694	33835	27904.7	49561.9	47388	58524.2	45833.3	51735	51526.9
chr11	53535208	53535608	Il5	chr11	+	53534295	53538605	1	838.773	1449.9	669.165	1052.45	822.691	1251.92	2245.11
chr1	132949780	132950407	Il10	chr1	+	132916421	132921547	1889	656.008	2029.06	1076.08	2027.84	1583.35	2122.58	1775.9
chr1	121969428	121969777	Hlx	chr1	-	186551023	186556372	15466	10664.3	7979.96	6725.75	7963.33	6215.18	8748.75	6567.77
chr1	193269816	193270212	Ppp2r5a	chr1	-	193175859	193220920	56025	21159.1	48719.8	48521.8	56487.7	44067.9	45180.3	61997.4
chr1	58769474	58769905	Cflar	chr1	+	58770129	58815726	118473	72004.5	128483	213661	132344	103049	127268	101975
chr1	127590138	127590453	Gpr39	chr1	+	127573572	127770438	69857	47137.3	85351.4	56996.3	86797.6	67273.2	78232.8	104258
chr10	44015407	44015983	Atg5	chr10	+	43988163	44084097	42770	29267.3	65958.1	60937.6	67553	52207.7	60869.1	69966
chr11	64001470	64002044	2810001G20Rik	chr11	+	63892985	63896761	2597	868.238	1912.81	1556.44	3177.72	2451.96	1596.43	2262.58
chr1	84274888	84275239	Pid1	chr1	-	84032867	84281220	113535	170261	346623	446630	401147	308509	317828	259877
chr1	84189501	84189767	Pid1	chr1	-	84032867	84281220	113535	170261	346623	446630	401147	308509	317828	259877
chr1	84275501	84275869	Pid1	chr1	-	84032867	84281220	113535	170261	346623	446630	401147	308509	317828	259877
chr11	3568817	3569258	Morc2a	chr11	+	3549496	3590373	24567	9733.74	23729.2	20972.2	26349.1	20220.5	23398.3	25462.4
chr10	62720845	62721110	Herc4	chr10	+	62706544	62780629	27077	24708.5	58422.9	46299.2	68519.7	52422.1	64951.2	60253.7
chr1	88614750	88615026	Dis3l2	chr1	+	88600378	88946672	128385	73335.6	140231	95001.3	150817	115054	127924	165114
chr11	109563386	109563680	Wdr35	chr12	+	8980806	9035653	25017	11014.3	19539.7	12312.6	18870.8	14382.5	19859	22504.9
chr10	94009459	94009834	Tmcc3	chr10	+	93977601	94053699	68593	46176.5	56633	60702.9	70099.1	53248	51374.6	68067.1
chr1	85158091	85158534	Gm7609	chr1	+	85196185	85210337	1	94.5725	349.233	114.167	124.7	94.0792	255.589	406.977
chr1	183963153	183963424	Enah	chr1	-	183834575	183950111	25961	12074.2	31362.4	15777.9	27528.4	20763.4	29109	39989.8
chr1	183855675	183855936	Enah	chr1	-	183834575	183950111	25961	12074.2	31362.4	15777.9	27528.4	20763.4	29109	39989.8
chr10	93201959	93202400	Ntn4	chr10	+	93103793	93208717	34371	26077.1	42985.3	32219.8	42309.8	31795.2	39434.1	56369.9
chr10	17403282	17403662	Cited2	chr10	+	17443033	17445480	22458	7483.22	6445.61	8097.47	6062.3	4551.96	6428.92	4753.76
chr12	16955075	16955559	Rock2	chr12	+	16901783	16995080	17517	12325.1	45950	28773.5	61650.9	46091.6	54726.5	46270.4
chr10	88925828	88926266	Nr1h4	chr10	-	88916978	88996367	194642	117446	224944	255654	257340	191278	189224	241021
chr1	100682638	100683059	Slco6d1	chr1	+	100317700	100405957	5665	2059.6	12425.7	4600.14	11505.6	8514.69	12124.1	13702.7
chr11	81725408	81725677	Accn1	chr11	-	80693666	81781898	333941	245667	408639	227114	373451	274950	356883	531752
chr10	21161451	21161885	Aldh8a1	chr10	+	21097105	21116384	79835	30053.3	61740.8	80117.2	99069.6	72855.3	62478.6	68924.4
chr1	44208620	44209108	Ercc5	chr1	+	44204588	44238105	16955	6626.33	18465.6	13941.4	20479.4	15037.5	17517.8	21935.8
chr1	162622832	162623458	Rabgap1l	chr1	-	162186702	162723069	202439	104852	221942	155985	256319	188086	221471	257010
chr10	107510768	107511168	Ppp1r12a	chr10	+	107599455	107714631	48987	23932.9	64794	45900.2	78179.9	57339.7	63495.2	74938.8
chr10	12952165	12952576	Phactr2	chr10	-	12927522	13194202	67969	44475.4	100675	58601.1	101002	73452.7	90125.5	128087
chr10	12951814	12952153	Phactr2	chr10	-	12927522	13194202	67969	44475.4	100675	58601.1	101002	73452.7	90125.5	128087
chr1	142026356	142026683	Cfh	chr1	-	141982431	142079988	20960	47631.4	133919	113198	112228	81233.2	148391	76125.9
chr10	87320322	87320746	Igf1	chr10	+	87321800	87399792	141655	106959	307074	235241	440749	315369	369231	204342
chr10	98190894	98191295	Atp2b1	chr10	+	98377785	98488777	57567	26146.8	65011	51157.9	66522.3	47496.6	64625.1	74219.2
chr11	110684064	110684402	Kcnj16	chr11	+	110829346	110889281	6373	5615.35	20827.1	9865.04	21133.2	15008.1	18164.6	28711
chr1	71680920	71681897	Fn1	chr1	-	71632096	71699745	357788	1.16197e+06	867672	995950	544133	383436	620647	378725
chr1	186553226	186553775	Fn1	chr1	-	71632096	71699745	357788	1.16197e+06	867672	995950	544133	383436	620647	378725
chr12	78450394	78451041	Fut8	chr12	+	78340007	78576974	29881	10270.9	54277.1	25807.1	63354.3	44402.8	52361.5	70297.9
chr12	8990054	8990210	Fut8	chr12	+	78340007	78576974	29881	10270.9	54277.1	25807.1	63354.3	44402.8	52361.5	70297.9
chr12	78362443	78362715	Fut8	chr12	+	78340007	78576974	29881	10270.9	54277.1	25807.1	63354.3	44402.8	52361.5	70297.9
chr1	80119913	80120237	Fam124b	chr1	-	80195273	80210519	1181	2059.6	5501.83	1981.42	4189.16	2886.45	4668.47	7211.26
chr1	164177344	164177789	Dnm3	chr1	-	163917432	164408161	111711	69728.9	147801	85895.7	151439	103843	134931	194812
chr1	152872365	152872807	Hmcn1	chr1	-	152409631	152840565	82062	43080.2	123053	61635.4	130564	89395.2	115246	158669
chr12	58312532	58312985	Slc25a21	chr12	-	57813620	58298459	125821	54648.2	168239	115695	199244	136261	158931	205817
chr1	84793621	84794238	Trip12	chr1	-	84717763	84835879	41129	26315.6	80021.5	73875.9	116939	79666.9	83613.5	80175.3
chr11	23209047	23209310	Usp34	chr11	+	23206894	23390560	46965	19454.5	94478	78686.7	130525	88272.9	108315	97618.6
chr11	56483093	56483432	Gria1	chr11	+	56825192	57143746	96997	58125.5	114545	61846.6	107249	71512.1	105518	145611
chr10	117922488	117922860	Ifng	chr10	+	117878102	117882948	1865	936.725	1554.35	892.368	1678.32	1117.95	1329.56	2453.5
chr10	117862625	117863038	Ifng	chr10	+	117878102	117882948	1865	936.725	1554.35	892.368	1678.32	1117.95	1329.56	2453.5
chr1	152103445	152103959	Pdc	chr1	+	152166546	152181036	1653	656.008	2710.19	1528.75	3093.5	2048.74	1821.76	3208.47
chr1	173354856	173355418	Tstd1	chr1	+	173349163	173350483	305	1371.94	1845.57	2879.28	2737.66	1812.23	1571.87	1886.55
chr1	130939542	130939975	Thsd7b	chr1	+	131169880	132115855	118001	50402.4	201938	85305	212889	140830	195828	253954
chr11	26133942	26134264	5730522E02Rik	chr11	-	25516845	26110576	91281	72323	165183	95973.8	194373	127546	155157	210121
chr1	84396281	84396612	Dner	chr1	-	84366413	84692796	74064	47816.6	95661.4	52395.2	98609.3	64128.7	83966.3	127873
chr1	145528149	145528567	Cdc73	chr1	-	145454628	145549814	23973	13871.2	44987.6	34979.6	52994.6	34400.2	45068	46591.5
chr10	104675273	104675720	Tmtc2	chr10	-	104624719	105011535	94191	64796.2	148593	90705.3	158620	102475	131969	185284
chr11	86194907	86195400	Med13	chr11	-	86079216	86171027	36236	29377.2	58987.3	47218.5	80216.2	51627.1	62881.3	64373.4
chr12	79053344	79053943	Gphn	chr12	+	79327641	79785756	98265	29819.2	152915	111019	237111	152221	183960	159083
chr12	79316392	79316975	Gphn	chr12	+	79327641	79785756	98265	29819.2	152915	111019	237111	152221	183960	159083
chr1	166178599	166178908	Slc19a2	chr1	+	166179185	166195499	43848	11013.5	40916.8	47251.9	72216.8	46201.8	47134.7	50417.5
chr1	4313081	4313353	Rp1	chr1	-	4280926	4399322	11565	5380.43	22360.8	8912.27	23384.2	14928.4	18586	29935.2
chr10	80282073	80282472	Jsrp1	chr10	-	80271245	80276240	1653	4195.44	1826.18	2627.19	3236.15	2065.15	1775.18	1102.46
chr10	27815821	27816244	Ptprk	chr10	+	27794625	28317203	150333	64198.5	232021	167202	325268	207005	236588	281621
chr1	179642941	179643221	1700016C15Rik	chr1	+	179659944	179683436	1181	4586.05	8299.62	4471.08	6495.25	4125.48	5856.55	11937.8
chr10	86514388	86514916	1700113H08Rik	chr10	+	86520790	86693344	25911	16578.5	43862.5	21909.6	45428.4	28705.2	35219.2	63009.9
chr1	22594706	22595138	Rims1	chr1	-	22278502	22812563	88973	35854.8	117506	50160.5	138426	87186.4	113768	149422
chr11	109958711	109959232	Abca8a	chr11	-	109886947	109957251	45622	8516.1	33576.1	23555.3	50525.1	31711.6	41164.6	41409.5
chr10	64369021	64369282	Ctnna3	chr10	+	62892845	64466415	228685	113598	365270	167035	389021	243496	339877	483976
chr10	63060276	63060587	Ctnna3	chr10	+	62892845	64466415	228685	113598	365270	167035	389021	243496	339877	483976
chr11	31724497	31725312	Cpeb4	chr11	+	31772210	31831577	36109	12693.4	55929.7	73579.3	89854.8	56027	67422	62064.8
chr11	9889436	9889642	Abca13	chr11	+	9091944	9584262	69857	33125.7	106260	48153.4	111427	69251.9	98081.7	143477
chr11	111460836	111461100	Kcnj2	chr11	+	110927477	110938139	1181	1778.88	4205.36	2038	3959.4	2442.04	4227.9	5938.42
chr12	25176824	25177150	Taf1b	chr12	+	25183445	25243436	25489	12914	22883.9	15448.2	23627.7	14521.4	21216.8	27022.6
chr1	59828699	59829102	Bmpr2	chr1	+	59821480	59927703	23129	11146.1	41314.1	29615.5	50346.9	30939.1	43705.5	47284.1
chr10	23570931	23571394	Vnn3	chr10	+	23571267	23589649	7553	3853.4	7317.96	8825.83	11343.2	6888.86	7711.98	8023.63
chr1	66147979	66148301	Mtap2	chr1	+	66221902	66489157	50977	18715.5	65786.8	28848.6	83622.2	50263.8	57198.7	90737
chr1	142277609	142278209	Kcnt2	chr1	+	142142833	142506838	40829	20973.6	98186.5	51152.3	121335	71858.1	103534	110224
chr1	21558655	21559052	Kcnq5	chr1	-	21388483	21952023	75757	31965.8	132464	52947.1	137639	81010.8	123276	175177
chr1	21888719	21889257	Kcnq5	chr1	-	21388483	21952023	75757	31965.8	132464	52947.1	137639	81010.8	123276	175177
chr1	173011265	173011568	Fcgr3	chr1	-	172981299	172989534	1	2952.32	6093.31	3989.76	4911.36	2706.78	4885.86	7607.67
chr1	172996584	172996995	Fcgr3	chr1	-	172981299	172989534	1	2952.32	6093.31	3989.76	4911.36	2706.78	4885.86	7607.67
chr10	19351517	19351780	Il22ra2	chr10	+	19341833	19354487	709	1498.16	4838.26	973.27	5505.65	3029.13	5039.7	6518.68
chr1	85106041	85106591	A530032D15Rik	chr1	-	85084713	85106428	2361	1311.02	2343.87	510.25	1856.5	1000.46	2122.58	3126.94
chr1	60350408	60350667	Nbeal1	chr1	+	60237442	60391549	29354	14832.4	67577.9	52499.2	89662.4	47811.3	75323.3	69955.6
chr1	60350920	60351346	Nbeal1	chr1	+	60237442	60391549	29354	14832.4	67577.9	52499.2	89662.4	47811.3	75323.3	69955.6
chr1	112672862	112673321	Cdh19	chr1	-	112785771	112873949	9205	2433.89	14781.4	4826.47	17114	9026.25	16347.1	17109.9
chr1	197053681	197053991	Cr2	chr1	-	196963004	197002909	8025	1877.63	9584.95	4502.14	11067.7	5727.66	9376.74	13080.9
chr1	50739600	50740080	Tmeff2	chr1	+	50984366	51244114	27141	13908.7	66450.9	28649.5	79070.3	37956.3	61590.3	89330.2
chr1	107614875	107615572	2310035C23Rik	chr1	+	107560437	107651708	28417	7693.06	37294.5	27051.2	67697.2	29387.7	38462.4	44745.5
chr1	87510399	87510925	Sp140	chr1	+	87497277	87541611	2361	843.153	4586.09	1632.77	3588.3	1490.27	3734.97	7410.09
chr1	87528884	87529291	Sp140	chr1	+	87497277	87541611	2361	843.153	4586.09	1632.77	3588.3	1490.27	3734.97	7410.09
chr1	87521398	87521906	Sp140	chr1	+	87497277	87541611	2361	843.153	4586.09	1632.77	3588.3	1490.27	3734.97	7410.09
chr1	179890607	179890873	Gm16432	chr1	+	179921565	179978422	6609	1404.59	4170.36	1981.42	4392.35	1769.5	3734.97	5684.68
chr10	15466620	15467068	Nmbr	chr10	+	14480094	14490362	237	94.5725	2365.76	453.667	4083.1	1117.95	1783.12	3525.02
chr10	38044820	38045145	Rfpl4b	chr10	-	38540346	38541585	1	1	162.993	114.167	439.477	1	260.645	96.255

## Sheet: FOXA2_C-overlap
			NB: UNFILTERED PEAKS
chr.x	start.x	end.x	feature	chr.y	strand	start.y	end.y	X0_pol_body	X3_pol_body	X8_pol_body	X16_pol_body	X24_pol_body	X36_pol_body	X48_pol_body	X168_pol_body
chr1	184120169	184120693	Vmn1r1	chr1	-	184087308	184088229	1	65.9035	251.067	169.064	1	373.317	292.423	231.026
chr11	74188117	74188521	Olfr412	chr11	+	74178172	74179111	1	312.378	254.082	335.684	1	373.317	242.95	409.473
chr10	19122196	19122552	Olig3	chr10	+	19076344	19078410	749	1231.78	1135.74	405.27	8.36936	272.227	1453.06	867.862
chr10	30046545	30047096	Cenpw	chr10	-	29915814	29920346	1	2306.07	2761.57	1920.98	816.893	10003.6	3890.62	2141.95
chr11	32038304	32038861	Il9r	chr11	-	32088996	32100279	10621	11229.7	7328.97	5654.76	1770.96	9829.25	7214.36	6088.17
chr1	88366861	88367262	1700019O17Rik	chr1	+	88322903	88324624	5193	1685.31	827.742	1064.28	241.557	947.051	1026.58	473.947
chr11	48967525	48967761	Olfr1395	chr11	+	48961760	48962714	1	936.725	466.141	319.07	177.338	685.742	264.978	575.857
chr10	68793914	68794389	Cdk1	chr10	-	68799382	68815660	11201	10049.9	21849.6	10365.4	14686.8	56730.9	33168	18209.3
chr11	100192161	100192522	Gast	chr11	+	100195725	100198310	1	701.002	537.046	882.496	357.361	1211.03	146.17	621.613
chr10	33856209	33856684	Fam26f	chr10	-	33845872	33847778	5193	3523.31	3450.04	4741.24	2002.31	6598.94	3529.5	3827.84
chr10	33835703	33836029	Fam26f	chr10	-	33845872	33847778	5193	3523.31	3450.04	4741.24	2002.31	6598.94	3529.5	3827.84
chr1	88409218	88409484	Ptma	chr1	+	88423310	88427273	31019	23707.5	17025	27631	11423	35936.8	21640.7	9623
chr1	88425083	88425683	Ptma	chr1	+	88423310	88427273	31019	23707.5	17025	27631	11423	35936.8	21640.7	9623
chr11	101345119	101345471	Rnd2	chr11	+	101329651	101332620	1	2094.24	1563.13	1489.02	928.749	2870.43	624.292	1436.9
chr1	88182809	88182968	B3gnt7	chr1	+	88199795	88203880	1889	3851.41	2372.58	1883.18	903.483	2701.44	2711.56	2861.14
chr1	88220480	88220747	B3gnt7	chr1	+	88199795	88203880	1889	3851.41	2372.58	1883.18	903.483	2701.44	2711.56	2861.14
chr10	128109987	128110556	Suox	chr10	-	128106942	128110974	4405	11753.7	9259.52	16787.2	8057.29	22749.7	9112.04	7744.1
chr10	80387225	80387775	Gadd45b	chr10	+	80392835	80394949	10659	27848.6	4274.82	5139.01	2567.12	7232.18	6182.64	3989.65
chr11	102628576	102628981	Adam11	chr11	+	102622752	102641576	25735	33527.4	20698.5	29118.3	14385.5	39965.2	23046.9	15560.8
chr10	42916963	42917224	9030612E09Rik	chr10	+	42894509	42896368	1417	1037.47	534.293	196.273	229.45	636.532	439.399	711.461
chr10	75280483	75280770	Gstt4	chr10	-	75277688	75285288	4957	2337.53	2739.55	1120.15	1052.45	2788.42	2965.43	2811.65
chr1	175902573	175903110	Ifi202b	chr1	-	175892699	175912975	3777	188.145	2140.73	793.166	990.599	2607.22	1867.99	2713.06
chr1	175923300	175923718	Ifi202b	chr1	-	175892699	175912975	3777	188.145	2140.73	793.166	990.599	2607.22	1867.99	2713.06
chr1	71218209	71218396	Bard1	chr1	-	71074108	71149546	11093	18574.6	30740.3	18566.6	24462	61163.2	36058.4	35099.3
chr11	17551137	17551778	Etaa1	chr11	-	17838751	17853878	3205	11901.8	12797.4	15089.7	11681.2	28813.6	14254.7	10950.3
chr11	17569634	17569924	Etaa1	chr11	-	17838751	17853878	3205	11901.8	12797.4	15089.7	11681.2	28813.6	14254.7	10950.3
chr11	18148644	18148997	Etaa1	chr11	-	17838751	17853878	3205	11901.8	12797.4	15089.7	11681.2	28813.6	14254.7	10950.3
chr10	51739040	51739509	Vgll2	chr10	+	51742491	51748277	945	1685.31	2291.19	906.333	642.397	1490.27	2258	1624.91
chr11	97711639	97712243	B230217C12Rik	chr11	+	97702093	97704357	2164	1093.61	1785.02	4355.51	1264.06	2924.98	1388.78	1534.65
chr11	40800149	40800514	Ccng1	chr11	-	40562053	40568788	35696	43166.2	32609.4	45586.4	20501	47054.8	39823.8	21361.4
chr1	171117795	171118398	Nuf2	chr1	-	171428064	171461595	6751	7790.62	13439.8	5914.32	9442.46	21453.8	13875.2	15826.2
chr1	171461477	171462060	Nuf2	chr1	-	171428064	171461595	6751	7790.62	13439.8	5914.32	9442.46	21453.8	13875.2	15826.2
chr10	74825900	74826176	Gm5779	chr10	+	74814799	74815706	1	950.662	391.304	253.097	185.76	418.33	119.086	447.326
chr11	78314075	78314670	Adamtsl5	chr10	-	79803460	79811191	13097	14074.3	9610.77	15287.6	7538.8	16828.5	11272.3	6903.86
chr10	59378964	59379386	Ddit4	chr10	-	59412422	59414518	52655	457311	84263.7	137157	41481.3	91094.6	55949.6	33443.4
chr10	129981655	129981948	Tmpo	chr10	-	90610315	90634327	24228	29895.6	35564.9	37679.2	30815.7	67571.1	49888.2	25833
chr10	90633176	90633525	Tmpo	chr10	-	90610315	90634327	24228	29895.6	35564.9	37679.2	30815.7	67571.1	49888.2	25833
chr10	90646129	90646515	Tmpo	chr10	-	90610315	90634327	24228	29895.6	35564.9	37679.2	30815.7	67571.1	49888.2	25833
chr11	95942288	95942641	Atp5g1	chr11	-	95934106	95937008	54841	163234	46447.3	70716.2	35998.2	76930.6	50741.5	27786.3
chr11	29513168	29513675	Rps27a	chr11	-	29445841	29448040	25371	71477.7	34462.2	42622.2	24592.3	52207.7	33458.3	19705.5
chr11	29514343	29514981	Rps27a	chr11	-	29445841	29448040	25371	71477.7	34462.2	42622.2	24592.3	52207.7	33458.3	19705.5
chr1	120355342	120355926	2900060B14Rik	chr1	-	120355245	120355842	15772	30359.5	28117.3	27463.4	22886.5	46033.2	36869.1	17283.7
chr1	90175451	90176230	Hjurp	chr1	-	90155430	90174154	238396	113774	157379	234358	155270	312207	190067	149603
chr10	110144417	110145023	E2f7	chr10	+	110182520	110224440	18409	19370.5	23360.5	15531.1	15311.4	30741.9	23947.9	26906.6
chr10	23430975	23431591	Rps12	chr10	-	23504988	23507015	45225	97071.2	38620.9	52725.8	26318	51567.6	37446.9	22838.1
chr10	23331006	23331477	Rps12	chr10	-	23504988	23507015	45225	97071.2	38620.9	52725.8	26318	51567.6	37446.9	22838.1
chr1	137207852	137208307	Timm17a	chr1	-	137198111	137210314	14974	41579.9	18403.5	22425.1	16539.9	32384.5	19216.2	14031.8
chr10	80884921	80885314	Nfic	chr10	-	80858935	80889918	149827	159613	120981	237370	142001	277807	143171	71513.8
chr1	121996912	121997485	Dbi	chr1	-	122009856	122017673	96907	238666	102649	227424	117914	227620	121110	50027.7
chr1	74766425	74766696	Cyp27a1	chr1	+	74760147	74784464	67574	46536.4	48993	85285.5	57198.5	109797	66256.3	52912.4
chr10	76138141	76138430	Col6a1	chr10	-	76171536	76188789	25961	20222.2	12435.4	12074.9	8252.84	15712.3	10686.9	13719.4
chr1	78567072	78567517	Mogat1	chr1	+	78507634	78534748	27849	18647.4	23802.2	32550.6	20268.3	38256.5	24879.6	24083.9
chr1	167538717	167539611	Mpzl1	chr1	-	167522311	167564672	21701	39754.6	31694.8	56306.5	22820.7	43040.2	29232.2	31295.4
chr10	5958021	5958336	Zbtb2	chr10	+	5958432	5979467	32415	47741.3	27312.6	42296.2	19236.3	35480.2	28424.7	23150.9
chr10	123279106	123279651	Zbtb2	chr10	+	5958432	5979467	32415	47741.3	27312.6	42296.2	19236.3	35480.2	28424.7	23150.9
chr11	100303377	100303895	Klhl10	chr11	+	100303237	100318338	7317	4398.91	6808.13	5478.99	4499.73	8156.49	6344.06	7470.82
chr10	77469691	77469954	Pfkl	chr10	-	77449693	77472541	44096	71506.3	50824.4	80061.6	36670.9	65737	46639.9	32258.7
chr11	45768934	45769338	Thg1l	chr11	-	45761655	45768996	11620	14577.2	9446.02	14024.5	6198.63	11081.6	10339.8	6926.33
chr1	166412762	166413408	Atp1b1	chr1	-	166367397	166388486	89521	256967	84917.7	96270.9	76353.3	136136	90339.7	75251.6
chr1	166451247	166452144	Atp1b1	chr1	-	166367397	166388486	89521	256967	84917.7	96270.9	76353.3	136136	90339.7	75251.6
chr10	38891531	38891953	Wisp3	chr10	-	38870776	38883600	4249	4588.05	6418.08	3953.4	6433.4	11254.8	6050.83	7066.5
chr11	3155957	3156496	Drg1	chr11	-	3149924	3166389	21534	57569.6	30025.7	39407.1	23864.8	41295.4	32086.5	17682.2
chr11	31671077	31671439	Bod1	chr11	-	31565149	31571862	8244	10571.1	7293.84	8116.49	4006.77	6901.45	7386.25	5531.61
chr1	122216202	122216871	C1ql2	chr1	+	122237158	122239751	2361	2342.3	1384.63	1559.81	928.749	1583.35	1443.67	2020.07
chr1	114085922	114086186	Dsel	chr1	-	113755278	113761495	1335	3846.63	3706.53	3671.93	2801.62	4727.06	3966.81	3062.89
chr10	126597089	126597497	B4galnt1	chr10	+	126602280	126609386	57245	71810.6	50625.2	88127.5	40410.9	68166.6	57701	32447.6
chr1	91806450	91806987	Gbx2	chr1	-	91824536	91827751	5665	3740.32	1007.43	1246.31	1312.22	2160.89	1265.28	427.359
chr11	20729314	20729832	1110067D22Rik	chr11	-	20723357	20731111	5043	7781.46	4906.41	11080.7	4481.83	7328.7	4656.55	3666.86
chr11	99990731	99990992	Krt15	chr11	-	99993072	99997263	1	2755.62	1870.61	1128.33	1643.84	2673.59	1071.72	2501.75
chr1	184210258	184210499	Degs1	chr1	-	184205900	184212890	31913	112079	41711.9	69383.2	33546.1	54376	55777	22118.9
chr1	184186112	184186502	Degs1	chr1	-	184205900	184212890	31913	112079	41711.9	69383.2	33546.1	54376	55777	22118.9
chr10	62836180	62836611	Dnajc12	chr10	+	62845190	62871588	17882	29519	48987.9	48201.3	28806.5	45829.9	64266.5	31094.5
chr10	119478323	119478672	Helb	chr10	-	119520663	119550021	37987	51359.2	38531.7	45056.2	32146.1	51029.8	37442.6	31120.7
chr1	182146872	182147355	Adck3	chr1	-	182095368	182126151	97491	59675.6	60085	214349	104328	165258	73009.2	53454.4
chr1	182140821	182141459	Adck3	chr1	-	182095368	182126151	97491	59675.6	60085	214349	104328	165258	73009.2	53454.4
chr1	182129970	182130384	Adck3	chr1	-	182095368	182126151	97491	59675.6	60085	214349	104328	165258	73009.2	53454.4
chr1	121969428	121969777	Tmem37	chr1	-	121963953	121970357	19593	55685	25006.2	62804.9	29799.5	47100.2	24248	16525.9
chr11	72242218	72242625	Ggt6	chr11	+	72249027	72251906	8275	18188.7	5668.93	7144.94	7179.54	11164	7765.07	3565.37
chr1	72219843	72220297	Mreg	chr1	-	72205806	72258881	57601	40908.5	43925.8	70680.1	35416	55069.5	50635	44308.3
chr11	5819402	5819895	Gck	chr11	-	5800825	5849602	198119	84954.1	93919.2	147081	95491.8	147136	172971	63715.7
chr11	69861760	69862022	Asgr1	chr11	+	69867870	69871396	45764	21990.5	25947.6	43003.6	18513.9	28298.2	23397.2	14940.6
chr11	94251155	94251500	Abcc3	chr11	-	94204608	94254290	179048	52582	68625.6	127255	80208	122207	57876.5	86454.6
chr10	68751431	68751993	Rhobtb1	chr10	+	68675404	68754532	219016	196114	110730	214042	120753	182032	100172	118886
chr10	68703342	68703709	Rhobtb1	chr10	+	68675404	68754532	219016	196114	110730	214042	120753	182032	100172	118886
chr10	68681496	68682217	Rhobtb1	chr10	+	68675404	68754532	219016	196114	110730	214042	120753	182032	100172	118886
chr10	68628537	68629135	Rhobtb1	chr10	+	68675404	68754532	219016	196114	110730	214042	120753	182032	100172	118886
chr10	23640237	23640839	Taar1	chr10	+	23640211	23641210	2125	468.863	313.977	57.5833	62.85	94.0792	1	791.325
chr10	23629293	23629572	Taar1	chr10	+	23640211	23641210	2125	468.863	313.977	57.5833	62.85	94.0792	1	791.325
chr10	57685379	57686267	Dux	chr10	-	57693398	57695423	172	810.104	493.14	227.333	62.85	94.0792	563.985	609.966
chr11	78369219	78369673	Tmem97	chr11	-	78355318	78364237	38340	22262.9	34431.3	47981.2	26084.8	38982.1	31901.6	31821.1
chr10	54934844	54935107	Msl3l2	chr10	+	55826722	55836686	8025	4586.05	4505.36	3848.67	4566.84	6795.78	3989.56	4737.96
chr11	119808547	119809167	Baiap2	chr11	+	119804405	119868096	142433	106897	132244	350525	154264	229233	150325	118542
chr11	40551586	40551857	Nudcd2	chr11	+	40547143	40553549	3846	2063.18	4663.81	3728.52	3659.1	5428.2	4314.93	5314.48
chr1	74381962	74382345	Pnkd	chr1	+	74331607	74400266	112381	106860	106843	228621	121407	180098	126838	80645.3
chr1	21221728	21222322	Gsta3	chr1	+	21230669	21255640	354688	27682.1	141277	237807	269256	399155	157029	238920
chr11	86892346	86892866	1200011M11Rik	chr11	-	86891233	86900279	13004	21405.2	14188.4	19505.9	13372.2	19821.1	15858.1	9612.6
chr11	5682281	5682879	2210015D19Rik	chr11	+	5662152	5684713	16433	13874.4	17558.8	20941.4	14886	22038.3	18487.4	17418.1
chr10	95143020	95143397	Nudt4	chr10	-	95009640	95026801	46023	80937.3	48823.5	53407.2	37078.6	54875	48801.9	43199.7
chr10	26491903	26492323	Bahcc1	chr11	+	120094260	120153611	105729	102832	75126.4	75809.4	63730.7	94199.8	84865.5	57280.8
chr11	120092768	120093209	Bahcc1	chr11	+	120094260	120153611	105729	102832	75126.4	75809.4	63730.7	94199.8	84865.5	57280.8
chr11	72309519	72309977	Spns2	chr11	-	72265139	72303406	143604	87885.9	95005	117774	96605.9	141853	87231.9	83576.2
chr11	72280656	72281021	Spns2	chr11	-	72265139	72303406	143604	87885.9	95005	117774	96605.9	141853	87231.9	83576.2
chr10	6239949	6240632	Mthfd1l	chr10	-	6179459	6373466	72893	79102.4	95364.5	71123.8	76782.3	112525	90911	107775
chr1	172813185	172813545	Dusp12	chr1	-	172804318	172815671	30295	37819	28806.4	53713.5	25050	36684.5	31357.4	19491.7
chr10	38844411	38844959	1700025K23Rik	chr10	-	38838613	38853701	1031	1492.19	3348.73	1549.7	3894.65	5684.55	2258.72	4787.04
chr1	30977581	30977907	Ptp4a1	chr1	-	30997147	31006600	38872	153603	38582	56404.7	30732.5	44715.2	43605.1	22400.5
chr1	182175864	182176413	Psen2	chr1	-	182157134	182186431	85831	74131.6	56827.9	99132.8	60220	87520.6	56723.5	49042.7
chr10	82224998	82225364	Nfyb	chr10	-	82211444	82226886	66360	110560	69263.5	107967	49014.3	70227.3	86512.2	45923.5
chr10	43104441	43104845	Nfyb	chr10	-	82211444	82226886	66360	110560	69263.5	107967	49014.3	70227.3	86512.2	45923.5
chr1	171892718	171893223	Hsd17b7	chr1	-	171879667	171899336	27794	36845.1	36324.2	45296.1	27696.4	39673.3	28534.1	31755
chr11	69191272	69191603	Chd3	chr11	-	69156774	69182928	93721	82613.6	74630.1	122490	75651.9	107479	67330.3	60005.4
chr10	118202950	118203676	Dyrk2	chr10	-	118296404	118305959	43023	14093.8	21572.8	22917.7	18701.3	26509.5	19423.8	23955.3
chr1	153398497	153398907	Tns1	chr1	-	73956804	74171021	621902	743774	535598	837365	481286	682036	525833	404511
chr1	74156302	74156640	Tns1	chr1	-	73956804	74171021	621902	743774	535598	837365	481286	682036	525833	404511
chr11	22334162	22334694	Tmem17	chr11	+	22412285	22419234	14408	12448.9	8425.18	10692.4	7426.42	10508.3	9145.62	5507.9
chr11	22338653	22339198	Tmem17	chr11	+	22412285	22419234	14408	12448.9	8425.18	10692.4	7426.42	10508.3	9145.62	5507.9
chr11	22340551	22340968	Tmem17	chr11	+	22412285	22419234	14408	12448.9	8425.18	10692.4	7426.42	10508.3	9145.62	5507.9
chr11	22864342	22864742	Commd1	chr11	-	22799727	22882284	81431	122123	97936.3	143560	101131	142744	95231.8	97003.4
chr11	70254130	70254601	Arrb2	chr11	+	70246154	70254176	9913	13008	14505.2	19906.8	13190.3	18505.1	15456.2	15070.8
chr11	101114082	101114516	Vps25	chr11	+	101115056	101120860	6442	6069.68	6267.49	6416.34	6068.09	8473.49	6133.17	5272.88
chr10	92185120	92185599	Nedd1	chr10	-	92147489	92185163	34548	45300.1	35054.6	46820.7	37614.5	52498.8	38204.9	32466.7
chr1	180299170	180300095	Hnrnpu	chr1	-	180258430	180267915	75130	130485	46947.5	70958.6	46865.4	64958.4	56997.2	28447.7
chr1	132642606	132643032	AA986860	chr1	+	132628552	132641199	23365	42645.4	41934.1	62146.8	36099.3	49758.7	36565.1	18377.3
chr1	195136794	195137146	Lamb3	chr1	+	195128187	195170072	63485	37179.2	33928.9	48068.9	35815.8	49237.6	28412.8	34019.5
chr1	132737584	132737987	Pigr	chr1	+	132723260	132748826	33779	11513.6	33960.4	56766.6	36588.8	50278.3	38356.6	41592.9
chr10	18581023	18581382	Perp	chr10	+	18564876	18576878	2972	3048.28	8624.52	7920.74	6994.78	9609.52	9566.69	8638.42
chr1	21210915	21211302	Tmem14a	chr1	+	21208711	21220248	9913	1169.26	5063.29	4287.13	5684.35	7778.45	4753.33	7954.58
chr1	21218747	21219538	Tmem14a	chr1	+	21208711	21220248	9913	1169.26	5063.29	4287.13	5684.35	7778.45	4753.33	7954.58
chr11	84639882	84640177	Dhrs11	chr11	-	84634229	84642505	29594	33943.5	22001.6	47224	27573.7	37714.9	26459.5	14649.9
chr11	31245692	31246206	Stc2	chr11	-	31259440	31270061	3305	6914.22	5794.23	3963.76	4277.07	5836.38	5045.84	5491.68
chr11	86745650	86745983	Ypel2	chr11	-	86749926	86807264	58161	95691.5	66815.8	117982	68721.6	93747	83387.8	63276.9
chr11	86775107	86775900	Ypel2	chr11	-	86749926	86807264	58161	95691.5	66815.8	117982	68721.6	93747	83387.8	63276.9
chr11	76668222	76668699	Cpd	chr11	-	76590709	76660510	38226	54181.1	42148	43596.9	40306.4	54967.7	49152.2	36674.2
chr10	41971114	41971509	Foxo3	chr10	-	41905591	41996548	407936	249947	215476	240415	223041	303930	236504	216846
chr1	75809346	75809624	Slc4a3	chr1	+	75542840	75556006	14869	18238.1	9538.03	8122.03	8637.36	11637.4	10536.3	7673.39
chr1	75656923	75657676	Slc4a3	chr1	+	75542840	75556006	14869	18238.1	9538.03	8122.03	8637.36	11637.4	10536.3	7673.39
chr1	75648971	75649462	Slc4a3	chr1	+	75542840	75556006	14869	18238.1	9538.03	8122.03	8637.36	11637.4	10536.3	7673.39
chr11	118610853	118611209	Rbfox3	chr11	-	118351073	118770886	365801	345996	260431	215029	211875	282651	234492	275779
chr10	60836662	60836934	X99384	chr10	-	60782404	60846271	120087	102831	78978.1	94771.3	74822.6	99594.2	81624.4	67518.9
chr11	115949553	115949943	Wbp2	chr11	-	115939886	115948278	36492	42333.6	28323.4	36026.5	28836.5	38314.9	31210.4	21067.7
chr11	3025078	3026735	Chac2	chr11	-	30876708	30886365	11772	8710.81	16535.7	17835.8	18913.7	25095	21620.1	17528.7
chr11	87348181	87348558	Tex14	chr11	+	87218566	87369325	687469	440634	491030	402196	460291	606133	464721	532487
chr11	87264525	87264814	Tex14	chr11	+	87218566	87369325	687469	440634	491030	402196	460291	606133	464721	532487
chr1	172222575	172223161	Gm7694	chr1	-	172228323	172236463	13373	32559.9	20182.3	17415.4	11195.8	14690.7	21581.5	10884.2
chr11	60638558	60639085	Dhrs7b	chr11	+	60644132	60671925	18901	19827.6	21690.7	25616.6	22077.5	28918.9	21682.2	19994.6
chr11	119320571	119321325	A730011L01Rik	chr11	+	119352660	119372779	49089	47852.8	39592.5	53350.2	33757.7	44174.7	39539.2	27204
chr10	60972484	60973075	Lrrc20	chr10	+	60938580	61044976	107381	67223.5	74010.7	70571.2	65446.7	85106.3	70513.5	73768.7
chr10	60985012	60985285	Lrrc20	chr10	+	60938580	61044976	107381	67223.5	74010.7	70571.2	65446.7	85106.3	70513.5	73768.7
chr11	105907781	105908320	Dcaf7	chr11	+	105898185	105920637	21799	16136.5	27583.2	26497.6	22033.8	28619	27046.7	28655.3
chr1	138440137	138440533	Kif14	chr1	+	138364534	138428088	6137	19934.3	26130.5	15985.9	21509.5	27935.4	25295.6	30588.2
chr10	61721048	61721477	Tacr2	chr10	+	61715185	61728738	10725	7882.2	7247.45	3997.71	5196.4	6706.52	8494.17	8742.41
chr10	75344816	75345377	Derl3	chr10	+	75356142	75358686	6332	8266.84	5510.48	17823.8	6157.05	7936.38	6129.19	3039.59
chr1	87482210	87482670	Sp110	chr1	-	87473474	87500466	22185	13662.6	22818.9	12902	14412	18523.8	21810.8	29028.4
chr1	87503129	87503487	Sp110	chr1	-	87473474	87500466	22185	13662.6	22818.9	12902	14412	18523.8	21810.8	29028.4
chr1	87479913	87480292	Sp110	chr1	-	87473474	87500466	22185	13662.6	22818.9	12902	14412	18523.8	21810.8	29028.4
chr1	87490760	87491350	Sp110	chr1	-	87473474	87500466	22185	13662.6	22818.9	12902	14412	18523.8	21810.8	29028.4
chr1	87388092	87388508	Sp110	chr1	-	87473474	87500466	22185	13662.6	22818.9	12902	14412	18523.8	21810.8	29028.4
chr1	87495650	87496220	Sp110	chr1	-	87473474	87500466	22185	13662.6	22818.9	12902	14412	18523.8	21810.8	29028.4
chr1	87458155	87458581	Sp110	chr1	-	87473474	87500466	22185	13662.6	22818.9	12902	14412	18523.8	21810.8	29028.4
chr1	186553226	186553775	Sp110	chr1	-	87473474	87500466	22185	13662.6	22818.9	12902	14412	18523.8	21810.8	29028.4
chr1	87500925	87501374	Sp110	chr1	-	87473474	87500466	22185	13662.6	22818.9	12902	14412	18523.8	21810.8	29028.4
chr1	87496313	87497632	Sp110	chr1	-	87473474	87500466	22185	13662.6	22818.9	12902	14412	18523.8	21810.8	29028.4
chr1	169284585	169285164	Aldh9a1	chr1	+	169280121	169298661	22457	18597.6	20372	37746.4	22381.2	28731.9	21928.9	19183.4
chr11	39691917	39692258	Mat2b	chr11	-	40492815	40508705	48145	48471.6	32174.2	43899.5	30926	39551.3	34770.3	26037.2
chr1	163026184	163026711	Klhl20	chr1	-	163018508	163061610	27000	28092.3	32293	36040.7	33120.5	42318.1	33555.8	31876.1
chr11	51665354	51666170	Phf15	chr11	-	51626957	51670983	90819	79933.9	77824.1	185576	65236.4	83254.6	84881.4	64790.6
chr11	89185511	89185932	Nog	chr11	-	89161951	89163873	2376	2106.18	611.882	583.688	372.1	474.407	543.401	305.483
chr10	21656301	21656684	Sgk1	chr10	+	21601989	21719708	161189	280344	153029	201208	140580	178721	173552	129557
chr11	54841265	54841729	Anxa6	chr11	-	54792463	54846973	89318	58693.3	76491.2	98519.8	73039	92746	71475.9	76192.5
chr10	25239572	25239993	Anxa6	chr11	-	54792463	54846973	89318	58693.3	76491.2	98519.8	73039	92746	71475.9	76192.5
chr1	188197814	188198300	Lyplal1	chr1	-	187911610	187941189	20720	31396.8	21667.9	24047.2	19931.2	25305.9	20132.3	16245.9
chr1	21070514	21070790	Tram2	chr1	-	20991458	21069290	68648	52601.9	63359.5	67350.1	49187.2	62415.6	57439.9	66541.8
chr1	135327729	135328177	Sox13	chr1	-	135278876	135320789	233778	466668	126532	132150	138131	175263	138403	105037
chr1	190890690	190891106	Kctd3	chr1	-	190794976	190831719	35057	56922.6	43979	49344.5	36375.6	46088.2	44087.2	36328.9
chr11	70492044	70492536	Camta2	chr11	-	70482964	70501607	78507	48111.2	52158.6	87793.3	54601.9	69176.4	55469.6	37176.6
chr11	53571063	53571570	Irf1	chr11	+	53583515	53591876	44248	28098.2	31326.3	52471.1	30415.9	38404.9	34225.4	31783.3
chr1	173099048	173099509	Mpz	chr1	+	173080843	173091254	1889	7542.15	4053.06	7482.28	5063.49	6379.59	2583	4918.07
chr10	117495574	117495967	Mdm1	chr10	+	117578842	117606055	25489	15192	13231.4	9149.92	9896.99	12467.9	14047.1	12922
chr1	133178353	133178716	Ikbke	chr1	-	133151178	133176140	114575	120515	98451.9	189749	100430	126506	103198	56127
chr10	76608673	76609085	Col18a1	chr10	-	76514923	76629275	733386	522510	493978	877489	473575	593510	502613	429140
chr10	76554065	76554806	Col18a1	chr10	-	76514923	76629275	733386	522510	493978	877489	473575	593510	502613	429140
chr11	102047510	102047890	Lsm12	chr11	-	102024802	102046570	32246	28656.9	22051.7	28617.2	21885.1	27398.3	22417.8	21259.5
chr11	120408836	120409191	Fam195b	chr11	-	120404201	120411041	58607	67358.9	34707.5	63971.9	28329.3	35358.5	35614.6	21549.8
chr10	79814076	79814516	2310004I24Rik	chr11	-	66851381	66866120	136486	45559.7	45424.5	59962.7	56066.8	69933.6	53994.1	41833.3
chr11	66858360	66858953	2310004I24Rik	chr11	-	66851381	66866120	136486	45559.7	45424.5	59962.7	56066.8	69933.6	53994.1	41833.3
chr11	60805231	60805631	Map2k3	chr11	+	60745558	60766305	78616	71632.6	45598.7	77022.7	49060.7	60868.7	48008.9	37430.4
chr10	24555696	24556194	Ipmk	chr10	+	70810540	70848633	67239	38315.6	42807.2	40656	43639.7	53920.2	47015.8	42759.2
chr1	72772563	72772994	Rpl37a	chr1	+	72757833	72760387	401	2625.01	2956.46	3321.36	4727.92	5836.76	1878.1	3378.18
chr11	78312617	78312933	Vtn	chr11	+	78312621	78315827	98919	380237	100376	157287	77644.8	95799.7	112824	41403.2
chr1	136257584	136258236	Tmem183a	chr1	-	136242673	136258576	55162	59105	36206.9	51277.3	33220.2	40968	39322.9	29925.6
chr11	3357731	3358204	8430429K09Rik	chr11	+	3352439	3379834	21787	12613.4	21092.1	20334.4	18200.7	22433.1	18449.5	21945.4
chr1	75138677	75139092	1810031K17Rik	chr1	-	75131788	75138942	49424	63295.5	43335.4	59384.1	37378.6	45989.4	44018.2	32214.2
chr1	135578226	135578764	Lax1	chr1	-	135575605	135586685	6365	2858.35	7382.31	5626.1	5642.77	6932.73	7048.97	9556.44
chr11	121189729	121190148	Wdr45l	chr11	-	121188516	121215761	48258	131816	70455.2	84046.7	55974.7	68602.6	69523.7	43017.1
chr11	4782753	4783229	Nipsnap1	chr11	+	4774005	4794203	52615	19041.2	44379.8	101793	57377.2	70318.1	50730	39634.5
chr11	69597781	69598118	Chrnb1	chr11	-	69597537	69609439	17664	13975.6	16108.3	18712.5	14497.6	17733.7	16953.4	15501.4
chr1	74745189	74745755	Ttll4	chr1	+	74708327	74744547	20533	21058.8	27536.8	22500.5	26856	32796.2	28949.8	25569.7
chr1	74728951	74729349	Ttll4	chr1	+	74708327	74744547	20533	21058.8	27536.8	22500.5	26856	32796.2	28949.8	25569.7
chr1	184429764	184430392	Capn2	chr1	-	184397389	184447614	79523	62409.1	67158	89153.7	58452.1	71372.1	62435.6	54743.5
chr1	184409043	184409516	Capn2	chr1	-	184397389	184447614	79523	62409.1	67158	89153.7	58452.1	71372.1	62435.6	54743.5
chr1	194982581	194982921	Irf6	chr1	+	194979305	194998229	40342	18037.4	33210.4	32176.2	36161.4	44151.1	33499.5	36480.3
chr1	92998968	92999398	Lrrfip1	chr1	+	92895303	93025521	182429	221156	185274	222532	165878	202376	177520	168367
chr10	82034225	82034503	1190007I07Rik	chr10	-	82082595	82085973	1653	4535.09	2378.47	3574.42	3237.99	3948.09	1991.85	2407.75
chr11	94430625	94430896	Chad	chr11	+	94426387	94430441	12415	10082.1	13087.1	15977	11899.9	14501.9	11970.3	9212.86
chr10	128191913	128192175	Wibg	chr10	+	128184934	128203620	13126	13584.5	15272.7	18969.7	14822.4	17978.3	16305.5	12271.4
chr1	9795415	9795681	Sgk3	chr1	+	9788210	9892649	44960	26683.9	56679.1	40166.5	52496.4	63667.2	59394.3	65531.4
chr10	126128272	126128727	Xrcc6bp1	chr10	-	126305483	126338427	28476	17027.6	14076.3	21455	16629.7	20118.7	15972.6	14244.7
chr11	106253963	106254367	Icam2	chr11	-	106238969	106243955	9967	5403.12	4382.81	5090.85	6007.55	7245.92	4618.63	4000.88
chr1	94925983	94926717	Kif1a	chr1	-	94912032	94998442	67733	64920	52470.7	43013.5	41697.6	50283.2	47411.3	57622.8
chr1	155881150	155881684	Glul	chr1	+	155747074	155756844	162113	236500	115508	120738	108569	130721	115943	82466.8
chr10	69644228	69644855	Ccdc6	chr10	+	69559868	69655948	89305	91977.2	98364.1	120060	92276.4	110813	100309	89090.2
chr11	105171098	105171389	Mrc2	chr11	+	105153959	105212459	32805	38194.9	32002.5	25835	24988.4	30000	31922.1	32221.7
chr11	105181207	105181642	Mrc2	chr11	+	105153959	105212459	32805	38194.9	32002.5	25835	24988.4	30000	31922.1	32221.7
chr11	59236366	59236967	Snap47	chr11	-	59220651	59263458	67193	64685.9	70712.1	82137.3	68924.8	82131.6	72027.7	65855.4
chr10	13703869	13704610	Hivep2	chr10	+	13686184	13871184	127336	150684	135804	116707	124478	147935	126831	144024
chr10	13684078	13684750	Hivep2	chr10	+	13686184	13871184	127336	150684	135804	116707	124478	147935	126831	144024
chr10	79954355	79954618	Onecut3	chr10	+	79957650	79980005	13186	15579	11306.8	8776.95	8930.03	10612.8	10816.5	12586.3
chr1	23487575	23487990	Ogfrl1	chr1	-	23373262	23390014	13911	18525.2	11736.7	14882.4	9583.01	11339.9	13756.8	12401.6
chr10	114735719	114736291	Rab21	chr10	-	114726917	114752647	26186	56343.6	41825.5	53810.3	37648.9	44477.6	45515	34493.3
chr1	191865963	191866726	Smyd2	chr1	-	191704370	191746167	68627	46146.6	41537.2	43638.1	36418.5	42991	38231.6	36044.4
chr10	79569844	79570111	Sbno2	chr10	-	79519758	79565447	170638	511932	235316	385166	228343	268656	244275	117500
chr1	74305534	74305921	Arpc2	chr1	+	74283123	74314787	20075	20211.5	41887.8	36141.6	32291.4	37976.9	40178.4	44097.4
chr1	134234667	134235122	Nuak2	chr1	+	134212701	134230065	27509	28188.2	37831.2	63521.9	43081.5	50451.8	39735.7	32917.2
chr11	53869652	53870141	Pdlim4	chr11	-	53868429	53882519	20769	11525.6	10488.2	11063.4	10136.8	11862.1	10605.3	12478.2
chr1	153175927	153176308	Ivns1abp	chr1	+	153191627	153211575	40469	44082.4	38885.9	51225.8	36727.5	42977.6	42348	31906.4
chr11	96798601	96799638	Pnpo	chr11	-	96799129	96805333	66030	132228	48868.2	77258.9	38446.9	44959.4	38174.9	39102.1
chr1	169317404	169317861	Mgst3	chr1	-	169302514	169323928	20950	10093.7	14121.2	21833	14392.8	16830	11105.8	19796.6
chr11	97276339	97276822	Arhgap23	chr11	+	97311473	97363714	76517	86996	76994.6	109948	79468.7	92895.9	79225.9	66913.7
chr10	77076045	77076490	Sumo3	chr10	+	77068978	77081076	19762	23710.7	21759.6	41625.1	25023.4	29250.4	26112.1	16412.7
chr10	60577117	60577403	Sgpl1	chr10	-	60561389	60610413	46736	57095.4	45907.7	71534.6	46225.3	53917.1	53504.8	43790.4
chr10	60597857	60598205	Sgpl1	chr10	-	60561389	60610413	46736	57095.4	45907.7	71534.6	46225.3	53917.1	53504.8	43790.4
chr10	60591638	60592048	Sgpl1	chr10	-	60561389	60610413	46736	57095.4	45907.7	71534.6	46225.3	53917.1	53504.8	43790.4
chr11	94286180	94286545	Cacna1g	chr11	-	94269704	94335512	66789	52667.2	36692	27104.4	32410.4	37791.1	34646.4	36057.3
chr1	91756900	91757302	Agap1	chr1	+	91351385	91791857	400021	379531	380315	420687	354752	412621	344800	374271
chr11	26389824	26390128	Vrk2	chr11	-	26371401	26493920	29973	26616.2	50128	48638.8	55680.4	64623.5	48764	55223.1
chr1	37398771	37399150	Inpp4a	chr1	+	37356737	37467580	127519	102435	106790	158041	101809	117637	104345	105527
chr1	133445536	133445876	Fam72a	chr1	+	133424565	133436449	3630	2365.4	9605	5792.24	8640.78	9968.86	12762.2	9822.66
chr10	110429212	110429600	Zdhhc17	chr10	-	110378835	110447122	46355	68717.9	57382.8	63110.7	55836	64375.2	55565	52869.2
chr1	137065934	137066783	Gpr37l1	chr1	-	137056826	137064258	5901	4731.79	3657.25	3188.21	3230.62	3724.17	4119.57	3674.76
chr1	137092601	137093062	Gpr37l1	chr1	-	137056826	137064258	5901	4731.79	3657.25	3188.21	3230.62	3724.17	4119.57	3674.76
chr11	73137882	73138209	Aspa	chr11	-	73118489	73138136	12163	2218.87	8877.08	5232.91	10418.9	12007.1	9023.57	10017.7
chr11	116349827	116350217	Prpsap1	chr11	-	116332129	116351660	70008	51138.6	49634.4	72164.2	50278.2	57923.7	46879	43260.9
chr11	88661930	88662274	Akap1	chr11	-	88692105	88725900	120277	156563	116371	160867	107237	123530	118588	90971.1
chr11	79038446	79038815	Wsb1	chr11	-	79052883	79068197	49414	136300	74347.8	68037.5	57357.5	65985	84363.9	45589
chr11	79094779	79095596	Wsb1	chr11	-	79052883	79068197	49414	136300	74347.8	68037.5	57357.5	65985	84363.9	45589
chr1	137179158	137179530	Rnpep	chr1	-	137159275	137180661	56175	35778.8	37320.4	53851.7	33709	38708.2	41196	26605.8
chr11	120842023	120842483	Csnk1d	chr11	-	120823054	120852647	61538	91059	69577.1	95044.1	63665.9	73107.1	77258.5	52469.4
chr11	107143307	107143702	Pitpnc1	chr11	-	107069205	107332034	332811	358285	263509	248742	285117	327308	258583	318799
chr11	107138172	107138532	Pitpnc1	chr11	-	107069205	107332034	332811	358285	263509	248742	285117	327308	258583	318799
chr11	48472770	48473145	Gnb2l1	chr11	+	48613861	48619743	12171	14474.5	19538.5	20394.6	18213.3	20875.2	17559.7	17266.7
chr11	55023567	55023960	Slc36a1	chr11	+	55017841	55049832	42617	28328	45182.7	49069.3	45544.2	52193.2	55509.7	44649.4
chr1	162910667	162911253	Serpinc1	chr1	+	162908736	162933145	211929	67147.1	134487	189136	142236	162856	128705	141129
chr1	184559654	184560154	Capn8	chr1	+	184495137	184562483	46493	29658.7	44268.4	48710.3	33619.7	38482.4	36870.9	44382.7
chr11	3346389	3346844	Rnf185	chr11	-	3315985	3352328	38803	68258.8	49109.1	65441.4	44838	50976.7	49282.6	38435.3
chr11	105961656	105962120	Map3k3	chr11	+	105946215	106016748	38322	16572.9	47645.5	38643.6	43619.4	49517.2	46963.8	55468.1
chr11	84685031	84685492	Ggnbp2	chr11	-	84645862	84684240	82070	107376	71699.9	99421	76075.1	86209.1	80212.5	56144.4
chr10	60552492	60553046	Pcbd1	chr10	+	60552090	60557077	44543	9840.85	16026.3	29113.7	17009.7	19265	15848	16743.8
chr1	157656898	157657214	Qsox1	chr1	-	157625284	157660029	90221	802728	406694	520776	281550	318819	393851	132729
chr11	26841432	26841695	Gm12070	chr11	+	26685107	26687859	1	1	210.831	114.167	495.8	559.475	314.813	203.989
chr11	44308986	44309473	Rnf145	chr11	+	44332465	44379022	55795	32186.4	46969.6	45810.9	47924.2	54026.6	47329.3	51932.4
chr11	58028732	58029346	Irgm2	chr11	+	58028478	58036285	11329	8890.39	14530.6	20255.9	13926.7	15662.3	15277.1	16635.3
chr1	36122778	36123370	Hs6st1	chr1	+	36125244	36163291	251431	239609	213654	311665	226948	254913	226148	185784
chr1	82220747	82221265	Irs1	chr1	-	82229679	82288014	134105	93828.4	94208.4	146024	142442	159575	122740	97244.2
chr10	82928627	82928941	Aldh1l2	chr10	-	82950191	82996885	19339	16766	18660.9	11256.3	17566.4	19640.7	16030	23400.4
chr11	116070384	116070853	2310004N24Rik	chr11	+	116060168	116076632	28972	138323	18194.6	13135.3	14501.8	16188	14671.1	15851.2
chr1	135268517	135268953	Etnk2	chr1	+	135260148	135276895	443713	464533	173636	134980	215398	240192	166574	202971
chr10	77829090	77829451	Agpat3	chr10	-	77734307	77814445	135299	167211	146661	246910	139150	154796	137931	111073
chr10	60899129	60899469	Eif4ebp2	chr10	-	60895244	60915417	67538	39703.2	53151.8	68299.9	51945.8	57574.3	56620.9	53128.7
chr10	60914184	60914807	Eif4ebp2	chr10	-	60895244	60915417	67538	39703.2	53151.8	68299.9	51945.8	57574.3	56620.9	53128.7
chr1	192646520	192646814	Rps6kc1	chr1	-	192596757	192735649	112228	90833.7	105394	97042.6	95376.3	105660	101001	115200
chr1	194484149	194484549	Hhat	chr1	-	194336709	194597413	129565	86633.6	127566	93937.5	101690	112631	120872	149120
chr10	3103284	3103859	Cnksr3	chr10	+	3134303	3227479	77445	66016.2	78546	79902.7	76803.9	84859.5	81152.1	91658.3
chr1	193465239	193465669	Ints7	chr1	+	193399612	193445570	21740	32323.7	34838.2	29363.9	37536.8	41448.7	32411.5	38445.3
chr1	66910699	66910979	Acadl	chr1	-	66877426	66909841	42802	53037.1	34454.5	48811.5	35611.3	39316.3	32601.8	31701.8
chr1	95024774	95025735	Agxt	chr1	+	95031852	95041998	36458	22102	24786.1	72764.7	52684.5	58120.2	36433.2	15819.1
chr11	24999960	25000321	Adcy1	chr11	+	6963491	7078508	67733	294716	98625.6	79732.7	60428.4	66543.1	76908.6	77699.9
chr10	79396905	79397528	Arid3a	chr10	+	79389816	79417757	34221	38890.5	27738.7	51627.4	22795.5	25101.5	24057.7	21131.4
chr1	172538661	172538940	Nos1ap	chr1	-	172247626	172519980	132272	416264	340786	259951	203972	224101	290911	288841
chr1	172482685	172483030	Nos1ap	chr1	-	172247626	172519980	132272	416264	340786	259951	203972	224101	290911	288841
chr1	13231407	13231779	Ncoa2	chr1	-	13129239	13364164	231336	224847	248371	260726	232852	255804	253515	233752
chr11	94020671	94021296	Tob1	chr11	+	94072767	94076806	74507	14704.2	32073.8	31955.4	36442.2	39999.1	37627.8	34742.9
chr11	94023490	94024127	Tob1	chr11	+	94072767	94076806	74507	14704.2	32073.8	31955.4	36442.2	39999.1	37627.8	34742.9
chr10	59440091	59440547	Ascc1	chr10	+	59465552	59562738	57299	46105.2	58413.9	53970.4	50189.7	55005.1	54807.7	68321.7
chr10	5734677	5735171	Esr1	chr10	-	5342779	5734495	143617	91475.1	161615	117073	163964	179369	152973	200810
chr10	5424394	5424843	Esr1	chr10	-	5342779	5734495	143617	91475.1	161615	117073	163964	179369	152973	200810
chr10	66505574	66506098	Reep3	chr10	-	66474255	66559605	94493	134989	79359.8	99550.6	72977.9	79746.6	73670.4	74473.7
chr10	66372930	66373430	Reep3	chr10	-	66474255	66559605	94493	134989	79359.8	99550.6	72977.9	79746.6	73670.4	74473.7
chr10	66568474	66568760	Reep3	chr10	-	66474255	66559605	94493	134989	79359.8	99550.6	72977.9	79746.6	73670.4	74473.7
chr10	66551417	66551790	Reep3	chr10	-	66474255	66559605	94493	134989	79359.8	99550.6	72977.9	79746.6	73670.4	74473.7
chr10	41468757	41469201	Cep57l1	chr10	-	41438651	41529436	21233	20784.1	37559.1	27132.8	40162.9	43802.4	37081.1	45417.2
chr11	83727377	83727966	Ddx52	chr11	+	83755591	83776588	3122	7954.67	14733	11849.3	11809.6	12849	15071.2	14108.3
chr11	83746181	83746759	Ddx52	chr11	+	83755591	83776588	3122	7954.67	14733	11849.3	11809.6	12849	15071.2	14108.3
chr1	123247249	123247546	Insig2	chr1	-	123202098	123229157	145913	168447	128675	345370	170190	185072	101178	59000.8
chr1	123228940	123229519	Insig2	chr1	-	123202098	123229157	145913	168447	128675	345370	170190	185072	101178	59000.8
chr10	125408617	125408896	Lrig3	chr10	+	125403274	125452415	67316	23470.2	52056.3	42030.4	47693.1	51724.8	48602.2	60260.4
chr10	125393626	125393970	Lrig3	chr10	+	125403274	125452415	67316	23470.2	52056.3	42030.4	47693.1	51724.8	48602.2	60260.4
chr10	125163291	125163550	Lrig3	chr10	+	125403274	125452415	67316	23470.2	52056.3	42030.4	47693.1	51724.8	48602.2	60260.4
chr1	71876396	71876658	Gm8883	chr1	+	71934685	71937778	10688	6028.66	8230.81	8505.59	3734.11	4045.37	6548.82	5938.42
chr1	71983713	71984157	Gm8883	chr1	+	71934685	71937778	10688	6028.66	8230.81	8505.59	3734.11	4045.37	6548.82	5938.42
chr1	71838800	71839220	Gm8883	chr1	+	71934685	71937778	10688	6028.66	8230.81	8505.59	3734.11	4045.37	6548.82	5938.42
chr11	100652344	100652733	Stat5b	chr11	-	100642044	100711899	127203	103732	97836.3	118200	86279.3	93289.2	100956	111414
chr11	100677924	100678719	Stat5b	chr11	-	100642044	100711899	127203	103732	97836.3	118200	86279.3	93289.2	100956	111414
chr11	100703465	100703958	Stat5b	chr11	-	100642044	100711899	127203	103732	97836.3	118200	86279.3	93289.2	100956	111414
chr10	117301351	117301721	Rap1b	chr10	-	117251652	117283030	33871	59218.5	45741.8	47627.5	38684.3	41713.1	49722.8	45002.1
chr1	33911242	33911501	Bend6	chr1	-	33908896	33964466	10149	8308.65	17601.4	8886.75	14659.4	15768.8	16131.1	23446.2
chr10	84488731	84489079	Fhl4	chr10	-	84559763	84565240	7170	4254.77	5965.66	4744.13	6481.03	6956	7167.41	3445.57
chr1	107804932	107805515	Zcchc2	chr1	+	107886982	107930654	93278	44355.6	59875.1	76161.9	65416.4	70194.1	65634.8	61430.5
chr1	107821988	107822740	Zcchc2	chr1	+	107886982	107930654	93278	44355.6	59875.1	76161.9	65416.4	70194.1	65634.8	61430.5
chr10	24907832	24908330	Akap7	chr10	-	24888895	25018969	72689	46495.8	57306.7	43986.5	47963.9	51402.5	51248.9	68848.7
chr11	35730473	35730722	Wwc1	chr11	-	35652679	35793591	234813	156630	197583	269902	217534	233077	206710	194276
chr11	75169119	75169501	Smyd4	chr11	+	75161934	75219207	15762	10363.7	19726.3	15004.2	20810	22287.7	17538	24071.4
chr11	87875486	87875801	Vezf1	chr11	+	87881842	87898231	20729	10176.1	14239.9	13220.5	12264.7	13130.9	14092.2	15491.8
chr1	184744818	184745143	Susd4	chr1	+	184695036	184825785	92919	58781.3	68819.3	49861	66675.3	71273.7	58597.7	85656
chr1	166235199	166235619	Blzf1	chr1	-	166219930	166237615	20150	19574.4	17161.9	18230.7	16526.5	17648.3	16041.6	15099.1
chr10	82789289	82789802	Slc41a2	chr10	-	82693883	82800562	40597	418824	166980	184087	144438	153852	185596	96220.6
chr10	82787663	82788126	Slc41a2	chr10	-	82693883	82800562	40597	418824	166980	184087	144438	153852	185596	96220.6
chr10	39786505	39786923	Slc41a2	chr10	-	82693883	82800562	40597	418824	166980	184087	144438	153852	185596	96220.6
chr1	129251754	129252068	Mgat5	chr1	+	129101562	129379549	147265	118430	195377	175738	170374	181047	194450	226873
chr11	61087341	61087860	Aldh3a2	chr11	-	61058256	61080629	95846	46724.8	42330.7	85419.2	57143	60688.2	44431	42162.8
chr11	61082489	61083022	Aldh3a2	chr11	-	61058256	61080629	95846	46724.8	42330.7	85419.2	57143	60688.2	44431	42162.8
chr1	43254442	43254905	Fhl2	chr1	-	43179918	43220806	9677	13264.4	19579.9	11789.6	16362.6	17342.3	17098.9	26625
chr11	119079140	119079511	Tbc1d16	chr11	-	119004356	119089813	223553	146502	131683	200690	117838	124880	129518	110387
chr11	8410125	8410796	Tns3	chr11	-	8331654	8564538	248981	151128	208365	182519	210474	222993	214345	237424
chr11	8469127	8469627	Tns3	chr11	-	8331654	8564538	248981	151128	208365	182519	210474	222993	214345	237424
chr11	72106514	72106967	Xaf1	chr11	+	72115130	72127235	18173	9399.27	15437.4	15904.5	13758	14567.9	18057	17663.5
chr11	89724964	89725239	Pctp	chr11	-	89844730	89864208	42831	55256.6	26216.4	63986.9	39373.1	41681.8	24055.2	27869.9
chr11	89724964	89725239	Pctp	chr11	-	89844730	89864208	42831	55256.6	26216.4	63986.9	39373.1	41681.8	24055.2	27869.9
chr1	74425601	74426069	Slc11a1	chr1	+	74421776	74432625	17717	14939.6	13447.5	14810.7	11910.4	12605.2	14068.4	12710.7
chr1	78675760	78676037	Acsl3	chr1	+	78654399	78704318	39790	12674.7	39516.5	46816.8	42042.7	44479.9	39038.7	45826.5
chr1	78583549	78584114	Acsl3	chr1	+	78654399	78704318	39790	12674.7	39516.5	46816.8	42042.7	44479.9	39038.7	45826.5
chr10	127053202	127053668	Lrp1	chr10	-	126975213	127058204	528530	927815	686684	1.12222e+06	709792	746678	798500	418365
chr10	66577755	66578149	Lrp1	chr10	-	126975213	127058204	528530	927815	686684	1.12222e+06	709792	746678	798500	418365
chr10	82160565	82160940	Inhbc	chr10	-	126793381	126807600	64611	37492.9	56856.7	81431.9	50976.2	53582.2	59069.6	40610.4
chr1	121264972	121265359	Inhbb	chr1	-	121312041	121318825	4957	50549.7	12702.4	15028.1	9124.53	9554.59	9015.62	3599.47
chr11	98906643	98907483	Igfbp4	chr11	+	98902573	98913957	321744	195854	232065	311331	214566	223750	219809	199900
chr1	52188679	52189101	Stat1	chr1	+	52176281	52218707	68240	46789.7	49465.4	57523.8	52055.5	54251.7	50989.6	57660.6
chr11	51819209	51819549	Cdkl3	chr11	+	51817722	51898169	20297	17686.2	31985.9	20917.6	28558.3	29733.7	29363.6	40862
chr10	41155162	41155683	Zbtb24	chr10	+	41170201	41185380	33749	16001.9	24244.3	29400.5	26905.2	27974.3	26754.9	23009.4
chr1	36311929	36312282	Uggt1	chr1	-	36196872	36301147	83487	114218	104317	196203	94798.3	98473.1	101564	77317.2
chr10	59957641	59957869	Cdh23	chr10	-	59766021	60159238	348505	309190	253288	207820	206347	214325	230629	268013
chr10	40236278	40236615	Slc22a16	chr10	+	40290167	40323938	19353	9449.44	13377	7717.04	12314.4	12752.8	13149	15983
chr10	44790043	44790299	Prep	chr10	+	44787019	44878801	62397	52534.6	68455.5	67405.2	70321	72809.5	65908.9	73408
chr10	44485202	44485681	Prep	chr10	+	44787019	44878801	62397	52534.6	68455.5	67405.2	70321	72809.5	65908.9	73408
chr10	44792594	44792933	Prep	chr10	+	44787019	44878801	62397	52534.6	68455.5	67405.2	70321	72809.5	65908.9	73408
chr1	120774839	120775232	Gli2	chr1	-	120730637	120950196	140421	131494	115498	81650.7	97600.2	101054	106965	130144
chr1	120905667	120906024	Gli2	chr1	-	120730637	120950196	140421	131494	115498	81650.7	97600.2	101054	106965	130144
chr10	74594357	74594836	Bcr	chr10	+	74523640	74647668	136645	102724	127021	142648	134478	139040	130558	134315
chr10	74592007	74592490	Bcr	chr10	+	74523640	74647668	136645	102724	127021	142648	134478	139040	130558	134315
chr10	74560956	74561513	Bcr	chr10	+	74523640	74647668	136645	102724	127021	142648	134478	139040	130558	134315
chr11	23104586	23104956	Xpo1	chr11	+	23156040	23197597	15843	10587	27599	18869.2	33922.2	35007.5	33739.3	26573
chr11	59850241	59850920	Pemt	chr11	-	59784118	59850341	284967	153836	188666	337530	196210	202408	156743	181698
chr10	116611264	116611592	Frs2	chr10	-	116507182	116585530	47691	59703.5	64357.6	64332.4	65040.6	67037.1	65358.5	67509.3
chr1	46302626	46303006	Dnahc7b	chr1	+	46123582	46430395	11801	5896.07	21675.6	6686.98	18246.7	18803	17441.6	33179.7
chr1	88491913	88492427	Cops7b	chr1	+	88483674	88503075	10621	9586.41	18180.7	14778.4	16869.2	17369.8	18384.5	22923.3
chr11	57835077	57835605	Larp1	chr11	+	57822565	57875534	75108	55420.2	76578.2	112439	84405.7	86813	77875.7	85689.7
chr10	82650091	82650344	Chst11	chr10	+	82448241	82658636	142545	116226	109146	79837.9	87911.1	90375.5	100553	127596
chr11	79883223	79883631	Crlf3	chr11	-	79860000	79894457	38078	35309.3	27298.6	28141.9	28926.3	29727.6	28869.2	27584.2
chr1	134310125	134310468	Dstyk	chr1	+	134314029	134363536	21210	15739.5	29676.7	26775.3	27580.6	28268.8	28539.9	33806.5
chr11	100041503	100041764	Krt9	chr11	-	100048094	100054560	3317	1663.8	2438.76	1883.42	2907.95	2979.53	1970.91	3041.26
chr1	34177899	34178191	Dst	chr1	+	34068669	34365497	195645	317212	243323	192950	247692	253749	231253	251714
chr1	133004620	133004853	Mapkapk2	chr1	-	132950280	132994120	81669	130961	92004.7	99542.6	102831	105327	79061.6	80021.4
chr1	132986198	132986751	Mapkapk2	chr1	-	132950280	132994120	81669	130961	92004.7	99542.6	102831	105327	79061.6	80021.4
chr1	158908744	158909413	Ralgps2	chr1	-	158734296	158869757	68415	40726.2	76552.7	72753.4	82996.8	84814.1	78121.9	90762.7
chr1	158749223	158749661	Ralgps2	chr1	-	158734296	158869757	68415	40726.2	76552.7	72753.4	82996.8	84814.1	78121.9	90762.7
chr11	118094655	118094919	Cyth1	chr11	-	118025479	118109906	283839	311271	230673	273282	228333	233171	192027	220593
chr11	78627412	78627815	1810012P15Rik	chr11	+	78640096	78657401	18173	11408.5	13035.4	12462.8	13298.7	13576.8	11202.9	14440.2
chr11	68221752	68222062	Ntn1	chr11	-	68022865	68200328	94681	94357.6	92406.9	76013.8	87958.8	89562.2	84739.1	105578
chr1	51940071	51940426	Myo1b	chr1	-	51806609	51972818	172990	95182.2	177064	272572	226400	230501	191866	183408
chr10	57699809	57700203	Gm4981	chr10	-	57697595	57699408	237	843.153	874.532	662.423	1068.5	1087.81	925.465	688.167
chr1	182882535	182882980	Tmem63a	chr1	+	182872648	182905235	33749	31043.2	29341.8	27582.6	33577.4	34171.7	27811.5	30129.4
chr1	91000913	91001448	Sh3bp4	chr1	+	90967036	91050368	60043	52908.9	46517.1	37874.5	41095.2	41812.2	41891.6	51251.9
chr1	135151833	135152247	Plekha6	chr1	+	135142673	135200012	254199	135105	148760	167466	150355	152896	146158	146350
chr1	135121846	135122199	Plekha6	chr1	+	135142673	135200012	254199	135105	148760	167466	150355	152896	146158	146350
chr11	12482399	12482896	Cobl	chr11	-	12136678	12364963	96525	91849.4	150101	106857	142625	144774	140692	141226
chr10	70812513	70812918	Hlf	chr11	-	90197848	90252231	124214	39354	71348.6	110402	68742.9	69768.4	63601.3	91349.7
chr11	90249288	90249799	Hlf	chr11	-	90197848	90252231	124214	39354	71348.6	110402	68742.9	69768.4	63601.3	91349.7
chr10	120866558	120867110	Rassf3	chr10	-	120847406	120913306	201652	106471	124469	112116	105778	107337	116372	121556
chr11	36864868	36865041	Rassf3	chr10	-	120847406	120913306	201652	106471	124469	112116	105778	107337	116372	121556
chr10	17767543	17768014	Reps1	chr10	+	17775745	17844961	29265	18990.7	40974.3	30079.5	41022.5	41607.4	37765.1	46584.8
chr10	74967568	74968021	1110038D17Rik	chr10	-	74969558	74980067	173257	123495	107423	202254	97318.9	98522.6	107374	65892.5
chr10	74978979	74979473	1110038D17Rik	chr10	-	74969558	74980067	173257	123495	107423	202254	97318.9	98522.6	107374	65892.5
chr10	116944442	116944701	Cpm	chr10	+	117066555	117124408	73633	28834.1	52828.2	51660.4	49452	49973.1	52146.6	60445.1
chr11	111899948	111900531	BC006965	chr11	-	112525240	112572670	6137	8765.36	15882.6	8900.47	13360.6	13497.5	13046.1	24316.4
chr11	112584178	112584529	BC006965	chr11	-	112525240	112572670	6137	8765.36	15882.6	8900.47	13360.6	13497.5	13046.1	24316.4
chr10	70800982	70801456	Cisd1	chr10	-	70793241	70807597	103735	38325.1	35449.6	44710.2	51183	51594.3	38588.8	40009.3
chr1	63115311	63115736	Ino80d	chr1	-	63094374	63160841	53256	46825.1	60429.5	57969.8	61733.6	62050.1	59330.4	60063.6
chr11	88471993	88472546	Msi2	chr11	-	88152883	88579543	244097	216588	264967	258304	245422	246665	248532	290366
chr11	108815848	108816259	Axin2	chr11	+	108781662	108812095	68525	34105.6	42159.1	85565.6	49846.5	50041.7	49677.3	36492
chr1	75056543	75057267	Nhej1	chr1	-	75013919	75121800	62585	37969.6	56395.1	46580.9	51654.1	51741.2	58902.4	66093
chr11	100927350	100927678	Naglu	chr11	+	100931407	100938985	9125	12890.9	10488.1	15916.1	12113.1	12127.6	7444.39	9699.95
chr11	110240881	110241830	Map2k6	chr11	+	110260435	110374951	155053	55679.4	67801.4	61090.5	82632.6	82691.9	58721.9	91316.4
chr10	22167943	22168375	Gm10825	chr10	+	22122618	22127276	1	1	32.9793	57.5833	1	1	1	102.494
chr10	103859524	103860033	Gm4340	chr10	+	103605568	103616547	1	1	31.7997	1	1	1	85.863	1
chr10	128494623	128495045	Olfr765	chr10	-	128483187	128484117	1	1	11.6161	1	1	1	1	1
chr10	23823165	23823637	Taar8c	chr10	-	23820648	23821757	1	1	1	1	1	1	1	1
chr10	71755988	71756533	1700049L16Rik	chr10	-	71442632	71443438	1	255.836	130.359	107.425	1	1	47.2233	310.059
chr10	71604476	71604924	1700049L16Rik	chr10	-	71442632	71443438	1	255.836	130.359	107.425	1	1	47.2233	310.059
chr10	128035017	128036113	Lin7a	chr10	+	106708886	106862199	86438	35397.7	90416.6	82942	112033	111874	94245.9	119562
chr10	106750321	106750880	Lin7a	chr10	+	106708886	106862199	86438	35397.7	90416.6	82942	112033	111874	94245.9	119562
chr1	183331419	183331700	Cnih3	chr1	+	183282758	183390772	63957	50615	50893.2	36497.2	40045.6	39932	44346.8	60992.5
chr1	121486544	121487024	Epb4.1l5	chr1	-	121441609	121545577	59070	53892	68176.7	73059.7	82415.7	82125.4	79541.1	70130.7
chr10	86307928	86308858	Nt5dc3	chr10	+	86241749	86301134	70801	51304.2	60491.2	66954.5	59361.7	59146	55072.8	59923
chr10	24668173	24668851	Arg1	chr10	-	24635012	24647276	353033	257930	399001	352498	342752	341248	283293	286267
chr1	28320950	28321338	Gm597	chr1	-	28832966	28837097	1	706.975	1148.45	502.304	491.589	488.521	869.492	1705.19
chr10	126575952	126576366	Os9	chr10	-	126531314	126558216	60563	97910.1	71502.4	120426	60884.5	60502.9	62418.3	41016
chr10	116780011	116780377	Cpsf6	chr10	-	116781723	116814029	40298	40338.3	30172.9	32735.8	35081.5	34847.7	36478.4	24628.4
chr10	116796014	116796369	Cpsf6	chr10	-	116781723	116814029	40298	40338.3	30172.9	32735.8	35081.5	34847.7	36478.4	24628.4
chr11	51581842	51582279	Sar1b	chr11	+	51577164	51605455	63286	24200.1	35686.2	44524.6	47080.4	46733.6	40721.5	32953
chr1	37777171	37777509	2010300C02Rik	chr1	-	37668520	37776656	59709	46526.9	49828	37283.6	44785.4	44399.8	46709.6	56533.4
chr10	122283286	122283652	Ppm1h	chr10	+	122115817	122382849	104313	91129.5	132326	104397	115417	114179	124585	166959
chr10	122349126	122349488	Ppm1h	chr10	+	122115817	122382849	104313	91129.5	132326	104397	115417	114179	124585	166959
chr10	17996032	17996506	Ccdc28a	chr10	-	17933490	17954787	31985	19839.6	21286.2	19343.6	21941.9	21700.3	21379.6	19458.4
chr11	63790278	63790705	Cox10	chr11	-	63776128	63892974	61255	98523.7	78619.4	76843.5	83077.6	82094.2	72653.1	87698.4
chr10	58928318	58928857	Ccdc109a	chr10	-	58911180	59079440	86590	100476	104510	111621	111333	109985	106738	115663
chr1	184367243	184367500	Trp53bp2	chr1	+	184339297	184392567	39413	23262.3	38621.6	39889.6	43673.1	42631.3	40791.2	39629.6
chr10	8679492	8679876	Sash1	chr10	-	8442016	8605868	215372	143018	185861	176481	184336	179523	191876	200842
chr1	186674798	186675457	Mosc2	chr1	-	186636946	186669726	232708	130262	124686	154873	148485	144479	117012	132316
chr11	30901631	30901947	Asb3	chr11	+	30854397	31002704	31420	20212.7	50200	38829	58073.4	56370.4	53250.2	60819.4
chr11	30957528	30957790	Asb3	chr11	+	30854397	31002704	31420	20212.7	50200	38829	58073.4	56370.4	53250.2	60819.4
chr1	89470220	89470832	Ngef	chr1	-	89373403	89470445	101494	49828.2	62383.4	55711.7	65991	64008.6	55324.1	80230.6
chr1	67045079	67045641	Lancl1	chr1	-	67047090	67085446	18997	17861	28108.8	22067	28783.9	27838.2	28380.6	27753.1
chr11	62751409	62751779	Cdrt4	chr11	+	62764694	62806597	4957	7763.94	13112	8658.25	11690.6	11305.9	10879	18729.6
chr1	89932159	89932472	Ugt1a10	chr1	+	89951985	90116577	312389	65053.8	189918	223125	263611	254914	179038	287635
chr1	89947289	89947927	Ugt1a10	chr1	+	89951985	90116577	312389	65053.8	189918	223125	263611	254914	179038	287635
chr1	89937028	89937544	Ugt1a10	chr1	+	89951985	90116577	312389	65053.8	189918	223125	263611	254914	179038	287635
chr1	89941343	89941790	Ugt1a10	chr1	+	89951985	90116577	312389	65053.8	189918	223125	263611	254914	179038	287635
chr10	75012572	75013100	AI646023	chr10	-	75012869	75023075	8969	13862.5	7252.43	6018.58	5592.76	5399.21	6651.73	6866.84
chr10	98674663	98674905	Dusp6	chr10	+	98725864	98730123	53895	32520.4	15590.8	36341.2	23414.5	22598.3	17062.1	12680.3
chr10	98790143	98790662	Dusp6	chr10	+	98725864	98730123	53895	32520.4	15590.8	36341.2	23414.5	22598.3	17062.1	12680.3
chr1	37097851	37098255	Tmem131	chr1	-	36849033	36996372	129431	97028.6	124115	124389	128709	124192	123330	126771
chr1	36864581	36865028	Tmem131	chr1	-	36849033	36996372	129431	97028.6	124115	124389	128709	124192	123330	126771
chr1	37062226	37062506	Tmem131	chr1	-	36849033	36996372	129431	97028.6	124115	124389	128709	124192	123330	126771
chr1	37082627	37083506	Tmem131	chr1	-	36849033	36996372	129431	97028.6	124115	124389	128709	124192	123330	126771
chr1	37033552	37034122	Tmem131	chr1	-	36849033	36996372	129431	97028.6	124115	124389	128709	124192	123330	126771
chr1	140407089	140407483	Nek7	chr1	-	140381290	140516273	124350	349496	122098	165054	135307	130235	135878	111630
chr1	140398201	140398469	Nek7	chr1	-	140381290	140516273	124350	349496	122098	165054	135307	130235	135878	111630
chr10	128407818	128408241	Mettl7b	chr10	-	128395332	128398044	110333	38743.2	49197.7	60870.2	58224.2	56012.2	38769	50761.5
chr10	19597036	19597551	Stab2	chr10	-	86303954	86470687	176681	104295	199579	240186	236141	226724	197031	205472
chr11	106905631	106906049	Bptf	chr11	-	106894394	106993236	115835	67595.4	96308.5	84972	94436.2	90638.8	94797	104059
chr11	106970929	106971379	Bptf	chr11	-	106894394	106993236	115835	67595.4	96308.5	84972	94436.2	90638.8	94797	104059
chr1	59014672	59015043	Trak2	chr1	-	58957293	59030326	31330	81074.6	53155.5	44321.4	47670.7	45313.4	50737.5	50744
chr10	41531618	41531881	Sesn1	chr10	+	41530379	41628242	47909	53341.7	68651.4	68523.4	72714.2	69047.8	77721.8	69195.2
chr11	75904572	75904950	Vps53	chr11	-	75859727	75993132	99428	81637.3	92493.8	87743.2	91303.9	86569.2	81679.3	99909.3
chr11	75864875	75865146	Vps53	chr11	-	75859727	75993132	99428	81637.3	92493.8	87743.2	91303.9	86569.2	81679.3	99909.3
chr1	13564984	13565281	Tram1	chr1	-	13554782	13579945	48388	63857.3	54718.6	100645	48691.9	46131.3	52576.7	33857.7
chr10	7571479	7572088	Zc3h12d	chr10	+	7552267	7590195	21005	25068.9	30248.8	26633.7	28251.4	26641.9	25330.6	35004.1
chr11	52802029	52802391	Fstl4	chr11	+	52578207	53000849	188565	148882	173967	112580	151075	142400	155885	211657
chr1	186691552	186692027	C130074G19Rik	chr1	-	186695804	186706915	98976	33355.4	42891.5	61617.8	49593.4	46708.4	50805.8	35689.6
chr1	135779167	135779576	Tor3a	chr1	-	158583747	158604470	37538	36688.6	38062.3	93568.9	37948.7	35674	29831.3	26644.1
chr10	95693022	95693436	Eea1	chr10	+	95403296	95508152	23241	14073.1	43621.6	31074.4	48308.7	45360.3	48505.5	47454.6
chr10	95242355	95242864	Eea1	chr10	+	95403296	95508152	23241	14073.1	43621.6	31074.4	48308.7	45360.3	48505.5	47454.6
chr10	95220676	95221108	Eea1	chr10	+	95403296	95508152	23241	14073.1	43621.6	31074.4	48308.7	45360.3	48505.5	47454.6
chr10	95239714	95240020	Eea1	chr10	+	95403296	95508152	23241	14073.1	43621.6	31074.4	48308.7	45360.3	48505.5	47454.6
chr1	52484952	52485425	Nab1	chr1	-	52512692	52557292	53260	22125.9	35123.7	28493.9	36200.6	33910.8	37805.1	36057.7
chr1	172586701	172587034	Olfml2b	chr1	+	172574662	172612920	28436	22198	21744.8	15649.8	17469.3	16318.5	21300.2	25724
chr1	172624664	172625331	Olfml2b	chr1	+	172574662	172612920	28436	22198	21744.8	15649.8	17469.3	16318.5	21300.2	25724
chr1	181489504	181489837	Cnst	chr1	+	181476659	181557604	58057	28447.1	43781.1	40743.6	48105.8	44772.1	41130.7	53496.4
chr11	104389493	104389765	Cdc27	chr11	-	104363842	104411934	24659	26517.5	33995.9	32769.5	42197.9	39259.1	34607.4	36935.8
chr11	104395996	104396249	Cdc27	chr11	-	104363842	104411934	24659	26517.5	33995.9	32769.5	42197.9	39259.1	34607.4	36935.8
chr10	120351946	120352344	Msrb3	chr10	-	120218156	120336027	66688	48770.2	66832	52429.4	63169.8	58735.9	62980.9	70766.3
chr11	30600036	30600350	Acyp2	chr11	-	30405991	30549396	20553	23097.9	34861	24540.6	37618.9	34973.6	32329.5	40362.9
chr11	62229748	62230125	Ncor1	chr11	-	62130191	62270834	72410	80553.8	111926	119666	126212	117155	119149	106000
chr1	54906818	54907128	Ankrd44	chr1	-	54702183	54983231	120855	66581.2	116838	80087.3	111977	103844	105866	147646
chr1	195212426	195212793	Camk1g	chr1	-	195172539	195196476	14689	11850.5	12078.4	10017.9	12169.9	11275.4	9178.85	15503
chr10	52080719	52081079	Gopc	chr10	-	52056829	52101930	33964	36743.2	37625.9	31073.9	36950.2	34161.8	37618.8	38651.2
chr1	124523260	124523531	Ddx18	chr1	-	123450411	123464557	17870	23355.9	16212.8	20938.3	18346	16915.5	15278.5	13571.7
chr1	123810665	123811180	Ddx18	chr1	-	123450411	123464557	17870	23355.9	16212.8	20938.3	18346	16915.5	15278.5	13571.7
chr1	90081232	90081670	Ugt1a2	chr1	+	90097185	90116577	230733	41754.3	101745	121635	142109	131024	88998.9	164724
chr10	84273662	84274319	Rfx4	chr10	+	84218792	84369281	85905	61981.1	74195.4	58510.8	68963.7	63574.1	66202.5	94187.8
chr10	84370180	84370639	Rfx4	chr10	+	84218792	84369281	85905	61981.1	74195.4	58510.8	68963.7	63574.1	66202.5	94187.8
chr10	107766987	107767254	Pawr	chr10	+	107769244	107851447	52590	61361.5	73451.9	52580.6	63689.6	58620.3	73462.1	72756.6
chr10	126792295	126792900	Pawr	chr10	+	107769244	107851447	52590	61361.5	73451.9	52580.6	63689.6	58620.3	73462.1	72756.6
chr1	158566291	158566666	Abl2	chr1	+	158488917	158579750	54989	39252.9	50874.2	50108.1	52102.6	47955.5	41164.3	57816.6
chr10	39345347	39345857	Traf3ip2	chr10	+	39332739	39375113	38764	31288.5	36701.7	36229	35039.1	32228.9	33603.2	40356.2
chr10	39344662	39345155	Traf3ip2	chr10	+	39332739	39375113	38764	31288.5	36701.7	36229	35039.1	32228.9	33603.2	40356.2
chr11	50016983	50017515	Sqstm1	chr11	-	50013653	50024292	149831	159373	110502	189336	118349	108636	127322	79040.1
chr11	50030819	50031083	Sqstm1	chr11	-	50013653	50024292	149831	159373	110502	189336	118349	108636	127322	79040.1
chr10	93817148	93817528	Gm4792	chr10	-	93756407	93761448	1653	923.585	1547.28	870.698	1732.8	1583.35	1103.5	2783.78
chr1	154885697	154886008	Nmnat2	chr1	+	154802230	154966391	75521	42093.9	64488.4	40597.7	65373.3	59588.5	60242.2	82153.6
chr11	48805659	48806134	Pex7	chr10	-	19579895	19627480	53682	35791.9	40689.4	43753.1	42471.1	38604.4	43914.9	42417.3
chr10	7229207	7230799	Pex7	chr10	-	19579895	19627480	53682	35791.9	40689.4	43753.1	42471.1	38604.4	43914.9	42417.3
chr10	19598944	19599409	Pex7	chr10	-	19579895	19627480	53682	35791.9	40689.4	43753.1	42471.1	38604.4	43914.9	42417.3
chr10	41273159	41273699	Ccdc162	chr10	-	41258654	41307559	34457	35558.6	43555.4	60215.8	47382.8	43003.6	39945.9	47586.5
chr10	18128963	18129442	Nhsl1	chr10	+	18127480	18253697	69149	40517.9	77064.3	71465.7	74695.2	67722.2	78499.3	79258.9
chr11	10346951	10347123	Vwc2	chr11	+	11014018	11163529	14869	11904.6	35104.3	14429.7	26720.2	24192.4	31230.6	48089.4
chr10	96148631	96150104	3110009E18Rik	chr1	+	122017763	122084766	29555	28362.2	34143.3	29496.8	33346.3	30175.4	31767.2	44129.4
chr1	122021294	122021666	3110009E18Rik	chr1	+	122017763	122084766	29555	28362.2	34143.3	29496.8	33346.3	30175.4	31767.2	44129.4
chr10	19765813	19766332	Map3k5	chr10	+	19654331	19862556	185798	124066	150683	128715	150576	136134	160346	172317
chr10	95824336	95824965	Btg1	chr10	+	96079634	96085445	17179	7516.67	10903.7	16742	13025.3	11762.9	13043.5	12034.3
chr10	96116694	96117119	Btg1	chr10	+	96079634	96085445	17179	7516.67	10903.7	16742	13025.3	11762.9	13043.5	12034.3
chr10	44174583	44174976	Prdm1	chr10	-	44156980	44178493	10086	9836.07	10149	8249.64	9457.2	8516.6	8994.68	13150.3
chr11	82985974	82986246	Slfn4	chr11	+	82988687	83003718	4721	1217.44	4569.32	3523.61	4144.95	3731.03	4199.73	4942.61
chr1	48541567	48541868	Slc39a10	chr1	-	46864388	46910354	64264	67467.2	36913.6	52033.1	38358.2	34507.4	41267.9	35875.9
chr1	40286621	40286994	Il1r1	chr1	+	40281924	40373022	104313	541515	490165	416881	251766	226336	429987	222461
chr1	40221158	40221707	Il1r1	chr1	+	40281924	40373022	104313	541515	490165	416881	251766	226336	429987	222461
chr1	40212827	40213333	Il1r1	chr1	+	40281924	40373022	104313	541515	490165	416881	251766	226336	429987	222461
chr1	40282029	40282457	Il1r1	chr1	+	40281924	40373022	104313	541515	490165	416881	251766	226336	429987	222461
chr1	40232557	40232985	Il1r1	chr1	+	40281924	40373022	104313	541515	490165	416881	251766	226336	429987	222461
chr1	40213964	40214385	Il1r1	chr1	+	40281924	40373022	104313	541515	490165	416881	251766	226336	429987	222461
chr10	9574508	9574976	Stxbp5	chr10	-	9475344	9620838	43319	41632.4	67526.8	54360.5	72020.7	64699.4	68201.3	73459.2
chr10	9813506	9813829	Stxbp5	chr10	-	9475344	9620838	43319	41632.4	67526.8	54360.5	72020.7	64699.4	68201.3	73459.2
chr11	16603194	16603683	Egfr	chr11	+	16652205	16813910	432759	1.02561e+06	1.90325e+06	771450	2.00725e+06	1.80135e+06	1.8208e+06	1.07683e+06
chr10	53793238	53794033	Man1a	chr10	-	53625838	53795602	163569	311314	190803	227456	228456	204987	211469	186350
chr10	120566334	120566584	Wif1	chr10	+	120471059	120537698	37525	19969	32440.5	21766.1	31778.2	28492	27390.8	37491.1
chr10	120496141	120496902	Wif1	chr10	+	120471059	120537698	37525	19969	32440.5	21766.1	31778.2	28492	27390.8	37491.1
chr10	120526334	120526739	Wif1	chr10	+	120471059	120537698	37525	19969	32440.5	21766.1	31778.2	28492	27390.8	37491.1
chr11	87176310	87176572	Ppm1e	chr11	-	87040407	87172496	46021	27868.5	44401.8	30602.2	48062.1	43063.9	38592	59876.8
chr10	6788875	6789148	Iyd	chr10	-	6791663	6806262	12929	6288.28	16757.7	10150.1	15606.9	13952.2	13656	22965.8
chr11	62890655	62890902	Tekt3	chr11	+	62875160	62908462	11329	7767.52	11606.5	9291.98	13967.2	12473.6	9420.8	17559.5
chr11	109349287	109349857	Cdk19	chr10	+	40069113	40203624	31986	27713.6	58528.3	42737.3	53773.9	47981.8	60201	73156.4
chr11	4102224	4102634	Tbc1d10a	chr11	+	4086835	4115508	53724	35366.2	46269.2	45168.9	41777.6	37267.8	35910	48518.2
chr10	74874580	74874816	Upb1	chr10	+	74869778	74902940	91033	25132.2	85763.2	99531	106713	95082.5	92692.7	89673.3
chr10	74870417	74871014	Upb1	chr10	+	74869778	74902940	91033	25132.2	85763.2	99531	106713	95082.5	92692.7	89673.3
chr1	166266085	166266671	Nme7	chr1	+	166237805	166367427	59237	41827.9	70849.5	50091.4	69126.1	61588.1	64405.9	86656.8
chr1	166254227	166254722	Nme7	chr1	+	166237805	166367427	59237	41827.9	70849.5	50091.4	69126.1	61588.1	64405.9	86656.8
chr11	67043333	67043846	Myh4	chr11	+	67051530	67073948	6845	3664.66	9462.27	4487.7	8254.94	7354.26	9945.14	10657.9
chr11	5399147	5399595	Xbp1	chr11	+	5420969	5425875	82613	192641	111674	127550	85205.5	75716	107669	47268.3
chr11	5398296	5398793	Xbp1	chr11	+	5420969	5425875	82613	192641	111674	127550	85205.5	75716	107669	47268.3
chr10	66750661	66751184	Nrbf2	chr10	-	66729436	66748029	32913	35990.2	29144.7	38195.7	28000.3	24867.6	23301.1	29713.5
chr1	159456633	159457343	Sec16b	chr1	+	159436926	159498555	155826	106936	123781	187631	163131	144463	133799	108528
chr1	159449549	159449932	Sec16b	chr1	+	159436926	159498555	155826	106936	123781	187631	163131	144463	133799	108528
chr1	64180496	64180776	Klf7	chr1	-	64082246	64167963	64924	36591	59299.3	48535.3	62735.8	55423.2	50431.7	68837.9
chr11	97828337	97828798	Plxdc1	chr11	-	97784550	97847760	34318	36061.5	35951.6	28063.2	29804.3	26310.4	29484.6	44225.1
chr11	77193965	77194418	Ssh2	chr11	+	77029926	77269050	93671	76928	120259	98816.2	133609	117694	125361	132490
chr11	77117007	77117276	Ssh2	chr11	+	77029926	77269050	93671	76928	120259	98816.2	133609	117694	125361	132490
chr11	77231631	77231900	Ssh2	chr11	+	77029926	77269050	93671	76928	120259	98816.2	133609	117694	125361	132490
chr11	106600902	106601142	Gm885	chr11	+	106612581	106628882	9223	9234.42	13791	13672.7	14168.3	12426.7	13154.8	17001.3
chr10	127240220	127240884	Rdh16	chr10	+	127238208	127252895	12222	1365.96	4770.63	4257.51	11194.8	9812.46	2997.93	8963.28
chr11	70830626	70831103	Derl2	chr11	-	70820946	70832765	42120	40720.6	34830.7	65628.5	39988.7	34957.6	34036.5	28947.3
chr10	92542197	92542577	Cdk17	chr10	+	92623620	92704087	52624	46655.1	70722.5	72923.6	87740.8	76403.4	68432.7	79909.1
chr10	92642703	92643273	Cdk17	chr10	+	92623620	92704087	52624	46655.1	70722.5	72923.6	87740.8	76403.4	68432.7	79909.1
chr1	135812561	135813010	Prelp	chr1	-	135806881	135817978	14210	20549.9	17333.9	19425	21209	18447.8	16801.7	14195.7
chr1	136330840	136331100	Adipor1	chr1	+	136312043	136328918	13165	11496.5	18020.9	17447.2	17746.7	15423.9	18408.3	17865.3
chr1	154245875	154246396	Glt25d2	chr1	+	154246996	154357825	42953	21290.5	42451.4	26218.6	39275.2	34013.8	41559	50002.8
chr1	158697384	158697808	Fam20b	chr1	-	158608701	158649041	21797	23001.1	27654.7	25932.3	26654.6	23047.6	26113.9	31347.4
chr11	18924507	18924943	Meis1	chr11	-	18780430	18918972	54806	40690.3	74830.5	53584.4	77279.8	66805.9	70788.3	87792.8
chr1	157205483	157205787	Xpr1	chr1	-	157122786	157264574	46709	44161.3	67477	52645.9	74615.2	64501.4	68528.4	74202.9
chr1	85270561	85271205	C130026I21Rik	chr1	-	85242918	85267141	2361	1642.7	4601.69	1192.38	2269.97	1955.66	2672.2	8526.53
chr1	85232064	85232511	C130026I21Rik	chr1	-	85242918	85267141	2361	1642.7	4601.69	1192.38	2269.97	1955.66	2672.2	8526.53
chr1	85250284	85250939	C130026I21Rik	chr1	-	85242918	85267141	2361	1642.7	4601.69	1192.38	2269.97	1955.66	2672.2	8526.53
chr1	85242746	85243360	C130026I21Rik	chr1	-	85242918	85267141	2361	1642.7	4601.69	1192.38	2269.97	1955.66	2672.2	8526.53
chr1	85260375	85260771	C130026I21Rik	chr1	-	85242918	85267141	2361	1642.7	4601.69	1192.38	2269.97	1955.66	2672.2	8526.53
chr1	85279972	85280562	C130026I21Rik	chr1	-	85242918	85267141	2361	1642.7	4601.69	1192.38	2269.97	1955.66	2672.2	8526.53
chr1	85338988	85339459	C130026I21Rik	chr1	-	85242918	85267141	2361	1642.7	4601.69	1192.38	2269.97	1955.66	2672.2	8526.53
chr10	34029835	34029991	Nt5dc1	chr10	-	34023417	34138334	24811	43221.6	54695.6	50894.9	57902.8	49832.3	54482.3	57174.4
chr1	64841585	64842391	Plekhm3	chr1	-	64835694	65003398	65133	41594.2	85254	51100.5	76269.1	65621.4	74754.1	107537
chr10	110841945	110842581	Nap1l1	chr10	+	110910247	110933942	9717	8785.27	19298.1	18320.8	19471.6	16738.5	18419.9	15077.5
chr1	176971262	176971824	Grem2	chr1	-	176763915	176851950	68327	55055.1	63604.6	34413	57935.7	49666	52714.3	80601.7
chr1	176837827	176838416	Grem2	chr1	-	176763915	176851950	68327	55055.1	63604.6	34413	57935.7	49666	52714.3	80601.7
chr1	176861328	176861710	Grem2	chr1	-	176763915	176851950	68327	55055.1	63604.6	34413	57935.7	49666	52714.3	80601.7
chr11	52216053	52216530	9530068E07Rik	chr11	+	52209929	52222225	16473	9941.19	13304.4	12020.7	14432	12358	14761.8	12731.1
chr10	20309956	20310436	Pde7b	chr10	-	20117809	20444874	137642	91498.6	159326	108128	161569	138061	142311	196049
chr10	20351809	20352216	Pde7b	chr10	-	20117809	20444874	137642	91498.6	159326	108128	161569	138061	142311	196049
chr1	127429766	127430085	Slc35f5	chr1	+	127457592	127492261	13942	14451.4	29365.8	23623	25810.6	22051.2	28721.2	25853.4
chr1	127415883	127416242	Slc35f5	chr1	+	127457592	127492261	13942	14451.4	29365.8	23623	25810.6	22051.2	28721.2	25853.4
chr11	4512793	4513065	Gm11961	chr11	-	4520277	4527769	6845	2134.45	2732.08	1933.26	4577.9	3910.33	2498.5	3351.98
chr1	89560001	89560263	Inpp5d	chr1	+	89516886	89617083	57349	46284.4	71030.5	56383.7	62892.4	53636	61880.2	86661
chr10	18422745	18423036	D10Bwg1379e	chr10	-	18307816	18463564	39649	22764.6	47100.5	25908.9	42062.7	35867.4	42362.5	62323.9
chr1	180224453	180224720	Fam36a	chr1	+	180249283	180252824	9022	6883.16	28322.4	29568.3	53817	45773.8	31288.4	22211.2
chr10	19884575	19885123	Mtap7	chr10	+	19868725	20001396	94439	74799.3	106639	138479	115639	98285.4	97931.9	115600
chr10	19906609	19907125	Mtap7	chr10	+	19868725	20001396	94439	74799.3	106639	138479	115639	98285.4	97931.9	115600
chr1	89668187	89668699	Atg16l1	chr1	+	89652645	89688997	38705	26652.1	42665.1	50794.8	46143.4	39194.2	45848	44097
chr10	24254681	24255154	Ctgf	chr10	+	24315247	24318488	11635	10595	6868.81	5279.62	6613.42	5608.64	6086.94	4588.63
chr1	167391630	167392238	Brp44	chr1	+	167391338	167411345	16918	4370.64	14596.6	16218	18672.3	15816.5	14621.6	20241.6
chr10	44930092	44930486	Popdc3	chr10	+	45009110	45038256	6660	4211.76	8904.6	4058.87	6062.3	5127.98	8598.17	10897.9
chr10	120907746	120908171	Epb4.1l2	chr10	+	25079603	25243324	87793	59547.4	91057.2	69639.9	92987.3	78550.7	77610.2	114145
chr11	29708386	29708793	Eml6	chr11	-	29643050	29926033	59417	38954.3	82810.8	57351.9	82221.4	69320.2	76546.4	102861
chr11	29662821	29663320	Eml6	chr11	-	29643050	29926033	59417	38954.3	82810.8	57351.9	82221.4	69320.2	76546.4	102861
chr10	64520684	64521347	Lrrtm3	chr10	-	63391244	63553003	29501	13594.1	45473.5	21652.9	43023.6	36016.2	47007.2	58007.1
chr10	58528902	58529167	Sh3rf3	chr10	+	58276106	58601664	95581	83052.8	115962	70502.4	93159.2	77938.8	100786	147620
chr11	49998337	49999009	3010026O09Rik	chr11	+	49988352	50013617	80097	60688.6	74677.9	116770	75091.3	62789.4	86693.5	68023
chr11	49989719	49990245	3010026O09Rik	chr11	+	49988352	50013617	80097	60688.6	74677.9	116770	75091.3	62789.4	86693.5	68023
chr10	67325080	67325410	Arsg	chr11	+	109334687	109434643	102107	111559	99986.9	115811	91582.6	76408.3	80851.6	94205.7
chr1	39162081	39162842	Npas2	chr1	+	39251116	39420085	60889	53056.6	75762.1	71805.2	74640.2	62189.3	65539.1	96448.5
chr11	46396150	46396714	BC053393	chr11	+	46385014	46402734	709	2059.6	5408.12	3339.42	5381.95	4468.8	4413.88	8019.05
chr11	106582926	106583160	Pecam1	chr11	-	106515531	106576595	59467	46577.4	49558.1	52386.3	51642	42799.5	44243.5	56835.3
chr11	20867309	20867457	Peli1	chr11	+	20991326	21050330	26367	7401.59	28961.2	23087.7	36763.6	30417.3	29610.3	35776.9
chr11	20893523	20894069	Peli1	chr11	+	20991326	21050330	26367	7401.59	28961.2	23087.7	36763.6	30417.3	29610.3	35776.9
chr1	107009582	107010112	Rnf152	chr1	-	107173493	107253287	82508	23027	57984.1	48554.1	50489.3	41772.6	47557.5	79609.6
chr1	107012713	107013147	Rnf152	chr1	-	107173493	107253287	82508	23027	57984.1	48554.1	50489.3	41772.6	47557.5	79609.6
chr1	107072187	107072613	Rnf152	chr1	-	107173493	107253287	82508	23027	57984.1	48554.1	50489.3	41772.6	47557.5	79609.6
chr1	92301145	92301734	Cops8	chr1	+	92499999	92509916	17937	8871.28	9801.2	11609	7777.78	6423.46	10303	8986.99
chr1	92578578	92578849	Cops8	chr1	+	92499999	92509916	17937	8871.28	9801.2	11609	7777.78	6423.46	10303	8986.99
chr1	169696929	169697348	Lmx1a	chr1	+	169619688	169778864	50033	35927.7	52191.7	32496.9	45538.4	37605	43085.8	70950.1
chr1	173041467	173041757	1700009P17Rik	chr1	+	173051791	173057098	3153	4705.51	5966.44	8634.65	4683.17	3866.46	4923.78	6869.34
chr11	106764958	106765364	Smurf2	chr11	-	106681377	106782029	62315	65466.3	89053	103947	107460	88596.4	97677.3	86380.2
chr10	83517460	83517812	1500009L16Rik	chr10	+	83185609	83225507	20533	11260	15005.3	9127.77	12275.5	10113.4	11909.3	19529.9
chr10	69792772	69793036	Slc16a9	chr10	+	69708023	69748699	28557	9247.56	15683.7	11386.8	16545.5	13630.2	13212.2	22363
chr10	8286487	8286876	Ust	chr10	-	7924550	8238623	64665	57644.1	105612	59409.6	95724	78723.1	92983.8	136804
chr1	153330974	153331277	Rnf2	chr1	-	153316535	153347953	18371	24047.6	23509.3	25785.7	24090.6	19793.3	27438.5	23828
chr10	115200963	115201470	Tspan8	chr10	+	115254339	115286949	3541	2995.32	7948.24	4018.42	8969.24	7364.94	5007.92	12463.2
chr10	115304388	115304797	Tspan8	chr10	+	115254339	115286949	3541	2995.32	7948.24	4018.42	8969.24	7364.94	5007.92	12463.2
chr1	37319760	37320027	Cnga3	chr1	+	37276105	37320229	14633	13364.4	18460.1	11806	16143.8	13218.2	17517.8	20148.9
chr1	17003953	17004326	Jph1	chr1	-	16987544	17087879	27646	13168.1	25867.4	17959.8	26660.7	21770.8	27944.1	28036.3
chr11	4851794	4852063	Ap1b1	chr11	+	4886907	4942732	66066	53078.9	63972.6	77066.5	76849.4	62640.6	58551.4	56247.2
chr11	108169481	108169920	Prkca	chr11	-	107794700	108205202	195140	154760	210835	175288	197164	160651	193234	261140
chr11	108166959	108167391	Prkca	chr11	-	107794700	108205202	195140	154760	210835	175288	197164	160651	193234	261140
chr11	108057941	108058505	Prkca	chr11	-	107794700	108205202	195140	154760	210835	175288	197164	160651	193234	261140
chr11	80279831	80280184	Psmd11	chr11	+	80242116	80285635	28678	18024.7	39485.2	46522.6	51013.5	41520	49063.8	35214.1
chr10	40163711	40164049	Pdss2	chr10	+	42941291	43184688	111865	64944.7	108275	86664.2	116662	94858.6	102055	128272
chr1	180154932	180155321	Pppde1	chr1	+	180117547	180182728	9737	14688.7	29282.1	31203.9	35909.8	29151.6	24557.5	32525.4
chr1	180166101	180166543	Pppde1	chr1	+	180117547	180182728	9737	14688.7	29282.1	31203.9	35909.8	29151.6	24557.5	32525.4
chr1	58170303	58171139	Aox3	chr1	+	58169979	58257296	161456	29662.3	178777	313913	262088	212648	286397	205000
chr1	58201007	58201727	Aox3	chr1	+	58169979	58257296	161456	29662.3	178777	313913	262088	212648	286397	205000
chr11	5943905	5944348	Camk2b	chr11	-	5869668	5965751	172603	165576	104475	161213	108929	87950.5	88908.9	110306
chr11	46512123	46512944	Timd2	chr11	-	46482461	46520606	21158	7538.17	27431.1	22249.1	31532.6	25421.5	22602.7	38720.7
chr10	92980415	92980892	Hal	chr10	+	92951512	92979488	155319	54297.8	108538	94026.3	125878	101383	93610.7	128396
chr10	82785305	82785780	Hcfc2	chr10	+	82161751	82204137	19149	14100.2	22028.5	19529.5	25007.6	20118.7	22318.9	22155.9
chr1	16189368	16189965	Rdh10	chr1	+	16095962	16122631	15346	7645.68	19307.6	16886.9	20844.7	16756.4	20162.3	23016.5
chr11	34496207	34496586	Dock2	chr11	-	34126863	34597325	157614	96350.9	169506	105608	154005	123659	151783	223279
chr10	93512016	93512318	Fgd6	chr10	+	93498745	93608084	146828	73848.8	137505	149496	168937	135375	141058	149014
chr10	44716994	44717406	Fgd6	chr10	+	93498745	93608084	146828	73848.8	137505	149496	168937	135375	141058	149014
chr10	93531404	93531776	Fgd6	chr10	+	93498745	93608084	146828	73848.8	137505	149496	168937	135375	141058	149014
chr1	172796959	172797298	Atf6	chr1	-	172634587	172797902	92980	88996.5	121085	125011	131095	104976	120493	129426
chr10	13603721	13604425	Aig1	chr10	-	13372514	13588636	52444	46958.9	91492.6	54592.6	82793.1	66231.4	85839.8	110221
chr10	13435804	13436207	Aig1	chr10	-	13372514	13588636	52444	46958.9	91492.6	54592.6	82793.1	66231.4	85839.8	110221
chr10	13558545	13558848	Aig1	chr10	-	13372514	13588636	52444	46958.9	91492.6	54592.6	82793.1	66231.4	85839.8	110221
chr11	68938525	68938956	Aloxe3	chr11	+	68939878	68962617	19845	10444.5	12035.7	8704.96	11373.2	9090.72	9348.21	13798.8
chr1	167351281	167352009	Dcaf6	chr1	-	167259631	167390594	62770	55173.8	62020.4	64879.2	72756.6	58125.9	63540.3	66768.1
chr10	7639248	7639558	Tab2	chr10	-	7625445	7675921	20031	17365.7	35520.5	44633	43179.9	34390.7	38571.4	38489.8
chr10	7808516	7809001	Tab2	chr10	-	7625445	7675921	20031	17365.7	35520.5	44633	43179.9	34390.7	38571.4	38489.8
chr10	7637177	7637607	Tab2	chr10	-	7625445	7675921	20031	17365.7	35520.5	44633	43179.9	34390.7	38571.4	38489.8
chr10	7905230	7905642	Tab2	chr10	-	7625445	7675921	20031	17365.7	35520.5	44633	43179.9	34390.7	38571.4	38489.8
chr1	191971679	191972179	Prox1	chr1	-	191945657	191994559	243077	230048	239136	357845	240992	191751	186565	208001
chr1	192028384	192028931	Prox1	chr1	-	191945657	191994559	243077	230048	239136	357845	240992	191751	186565	208001
chr1	191946175	191946678	Prox1	chr1	-	191945657	191994559	243077	230048	239136	357845	240992	191751	186565	208001
chr1	191882936	191883531	Prox1	chr1	-	191945657	191994559	243077	230048	239136	357845	240992	191751	186565	208001
chr1	192004672	192005008	Prox1	chr1	-	191945657	191994559	243077	230048	239136	357845	240992	191751	186565	208001
chr1	135514870	135515277	Spats2l	chr1	+	57831704	58005241	60503	35899	72294.3	42331.3	68525	54412.6	63168.4	99449.7
chr1	57956078	57956533	Spats2l	chr1	+	57831704	58005241	60503	35899	72294.3	42331.3	68525	54412.6	63168.4	99449.7
chr1	57992584	57992845	Spats2l	chr1	+	57831704	58005241	60503	35899	72294.3	42331.3	68525	54412.6	63168.4	99449.7
chr1	57911477	57911992	Spats2l	chr1	+	57831704	58005241	60503	35899	72294.3	42331.3	68525	54412.6	63168.4	99449.7
chr11	11860813	11861144	Grb10	chr11	-	11830501	11937423	32967	30546.7	51150.6	36273.8	53883.6	42780	48296.4	64287.7
chr11	12090413	12090824	Grb10	chr11	-	11830501	11937423	32967	30546.7	51150.6	36273.8	53883.6	42780	48296.4	64287.7
chr11	12104712	12105150	Grb10	chr11	-	11830501	11937423	32967	30546.7	51150.6	36273.8	53883.6	42780	48296.4	64287.7
chr11	12136345	12136803	Grb10	chr11	-	11830501	11937423	32967	30546.7	51150.6	36273.8	53883.6	42780	48296.4	64287.7
chr1	109921313	109921595	Serpinb8	chr1	+	109486582	109505555	6845	2044.47	8797.66	3281.63	8197.83	6503.57	12741.3	8497.41
chr1	196436626	196437026	Fcgr2b	chr1	-	172890688	172906202	34763	12444.2	19541.8	22738.6	24237.5	19202.4	17660.8	22101.4
chr1	172905647	172906174	Fcgr2b	chr1	-	172890688	172906202	34763	12444.2	19541.8	22738.6	24237.5	19202.4	17660.8	22101.4
chr11	85452161	85452475	Bcas3	chr11	+	85166665	85639560	241901	143346	248230	189516	262117	207066	224102	306577
chr11	85451654	85451948	Bcas3	chr11	+	85166665	85639560	241901	143346	248230	189516	262117	207066	224102	306577
chr11	85446079	85446623	Bcas3	chr11	+	85166665	85639560	241901	143346	248230	189516	262117	207066	224102	306577
chr11	85501079	85501371	Bcas3	chr11	+	85166665	85639560	241901	143346	248230	189516	262117	207066	224102	306577
chr11	5326480	5326867	Znrf3	chr11	-	5176331	5344850	77646	39555.9	83537.6	69352.4	99782.4	78717	82521.1	101934
chr11	5370041	5370521	Znrf3	chr11	-	5176331	5344850	77646	39555.9	83537.6	69352.4	99782.4	78717	82521.1	101934
chr1	155538077	155538590	Rgs8	chr1	+	155500166	155544795	33011	19762.3	18772.6	15093.8	15649	12317.2	13929	26399.9
chr1	155536789	155537143	Rgs8	chr1	+	155500166	155544795	33011	19762.3	18772.6	15093.8	15649	12317.2	13929	26399.9
chr1	182698206	182698573	Acbd3	chr1	+	182656173	182684335	15105	9488.06	20147.3	18647.7	19797.7	15571.2	21473.9	20330.7
chr10	55876819	55877251	D630037F22Rik	chr10	-	55734099	55948495	49894	24436.2	62400.5	42360.7	79801.4	62599.8	60488.5	78629.2
chr11	79374181	79374653	Nf1	chr11	+	79153393	79395111	75177	61340.4	134838	105273	139037	108970	139516	142066
chr11	79191849	79192264	Nf1	chr11	+	79153393	79395111	75177	61340.4	134838	105273	139037	108970	139516	142066
chr11	79381862	79382333	Nf1	chr11	+	79153393	79395111	75177	61340.4	134838	105273	139037	108970	139516	142066
chr1	66761631	66762016	Rpe	chr1	+	66747466	66766379	7092	2638.15	8208.4	6686.5	10492.9	8206.08	8737.56	9618.42
chr1	132574954	132575654	C4bp-ps1	chr1	-	132566778	132578148	8497	3743.9	7928.45	7617.11	7766.72	6073.27	5092.78	7581.46
chr11	32342924	32343447	Ubtd2	chr11	+	32355371	32418709	17845	7052.79	17799.6	8736.98	22365.7	17473.6	15566	22837.2
chr1	132949780	132950407	Il10	chr1	+	132916421	132921547	1889	656.008	2029.06	1076.08	2027.84	1583.35	2122.58	1775.9
chr10	7806887	7807495	Hlx	chr1	-	186551023	186556372	15466	10664.3	7979.96	6725.75	7963.33	6215.18	8748.75	6567.77
chr1	193237837	193238237	Ppp2r5a	chr1	-	193175859	193220920	56025	21159.1	48719.8	48521.8	56487.7	44067.9	45180.3	61997.4
chr1	193214749	193215697	Ppp2r5a	chr1	-	193175859	193220920	56025	21159.1	48719.8	48521.8	56487.7	44067.9	45180.3	61997.4
chr10	110682332	110682916	Osbpl8	chr10	+	110601857	110734303	86980	41033.2	91884.9	83875.5	119989	93541	86505.3	112205
chr10	110576196	110576579	Osbpl8	chr10	+	110601857	110734303	86980	41033.2	91884.9	83875.5	119989	93541	86505.3	112205
chr1	58769474	58769905	Cflar	chr1	+	58770129	58815726	118473	72004.5	128483	213661	132344	103049	127268	101975
chr10	106461547	106461916	Acss3	chr10	-	106373219	106560720	27753	12382.8	49305.9	28618.2	59116.7	45899	49779.5	64701.2
chr11	17267727	17268066	C1d	chr11	+	17157620	17169179	7553	1840.6	4445.85	4117.86	4534.21	3515.88	4976.86	4227.16
chr10	19627820	19628246	Slc16a10	chr10	-	39753340	39862060	155499	227353	181682	187324	178062	138061	166830	159929
chr10	39838719	39839140	Slc16a10	chr10	-	39753340	39862060	155499	227353	181682	187324	178062	138061	166830	159929
chr10	39783308	39783689	Slc16a10	chr10	-	39753340	39862060	155499	227353	181682	187324	178062	138061	166830	159929
chr10	39844867	39845377	Slc16a10	chr10	-	39753340	39862060	155499	227353	181682	187324	178062	138061	166830	159929
chr10	39815117	39815622	Slc16a10	chr10	-	39753340	39862060	155499	227353	181682	187324	178062	138061	166830	159929
chr1	127612754	127613135	Gpr39	chr1	+	127573572	127770438	69857	47137.3	85351.4	56996.3	86797.6	67273.2	78232.8	104258
chr1	140825342	140825732	Dennd1b	chr1	+	140860285	141072619	62627	42814.2	98117.7	81564.8	122449	94867.4	95301.8	114637
chr11	64001470	64002044	2810001G20Rik	chr11	+	63892985	63896761	2597	868.238	1912.81	1556.44	3177.72	2451.96	1596.43	2262.58
chr1	84237661	84238132	Pid1	chr1	-	84032867	84281220	113535	170261	346623	446630	401147	308509	317828	259877
chr1	84189134	84189472	Pid1	chr1	-	84032867	84281220	113535	170261	346623	446630	401147	308509	317828	259877
chr1	138792375	138792868	Nr5a2	chr1	-	138740160	138857025	166570	162844	184463	169000	216574	166380	201924	174845
chr1	138833509	138833785	Nr5a2	chr1	-	138740160	138857025	166570	162844	184463	169000	216574	166380	201924	174845
chr1	138783239	138783810	Nr5a2	chr1	-	138740160	138857025	166570	162844	184463	169000	216574	166380	201924	174845
chr11	96499282	96499892	Skap1	chr11	+	96325904	96620936	96997	56968.8	101061	54276.9	100112	76861.5	86105.2	140572
chr11	3568817	3569258	Morc2a	chr11	+	3549496	3590373	24567	9733.74	23729.2	20972.2	26349.1	20220.5	23398.3	25462.4
chr10	37200138	37200501	Marcks	chr10	-	36853048	36858732	21112	14075.5	11361.2	12412.5	12945.8	9918.13	14013.9	9603.86
chr1	196421509	196421953	Plxna2	chr1	+	196446022	196643062	126733	75007.6	135080	95442.8	138856	106184	143087	161217
chr1	88635077	88635482	Dis3l2	chr1	+	88600378	88946672	128385	73335.6	140231	95001.3	150817	115054	127924	165114
chr1	23886560	23886933	Smap1	chr1	-	23852465	23929128	30875	36931.9	40013.1	41328	47255.2	35946.3	40166.1	40304.7
chr10	6639911	6640333	Plekhg1	chr10	-	6379238	6606164	67684	52217.3	103880	72308.5	116575	88596.7	94121	134089
chr10	23531213	23531856	1110021L09Rik	chr10	+	23516791	23547774	7081	7948.69	14153.8	12951.6	17522.4	13311.3	12752.8	16515.9
chr10	93929098	93929554	Tmcc3	chr10	+	93977601	94053699	68593	46176.5	56633	60702.9	70099.1	53248	51374.6	68067.1
chr10	12408712	12409131	Utrn	chr10	-	12101985	12581533	183609	85058.4	220065	196090	247215	187538	209771	266604
chr10	11963664	11964071	Utrn	chr10	-	12101985	12581533	183609	85058.4	220065	196090	247215	187538	209771	266604
chr1	170605200	170605470	Pbx1	chr1	-	170049494	170362389	155271	81499.5	148852	106622	147099	111339	129314	185162
chr10	127374066	127374414	Sdr9c7	chr10	+	127335590	127348815	34221	12285.3	19898.9	39095	40626.7	30735.4	27410	16695.6
chr1	85160542	85161377	Gm7609	chr1	+	85196185	85210337	1	94.5725	349.233	114.167	124.7	94.0792	255.589	406.977
chr1	85151798	85152167	Gm7609	chr1	+	85196185	85210337	1	94.5725	349.233	114.167	124.7	94.0792	255.589	406.977
chr1	85194947	85195454	Gm7609	chr1	+	85196185	85210337	1	94.5725	349.233	114.167	124.7	94.0792	255.589	406.977
chr1	183855675	183855936	Enah	chr1	-	183834575	183950111	25961	12074.2	31362.4	15777.9	27528.4	20763.4	29109	39989.8
chr1	188843710	188844094	D1Pas1	chr1	+	188791294	188794506	1653	2315.23	1608.22	1071.99	1359.33	1024.87	1066.3	1794.21
chr1	58086356	58086816	Aox1	chr1	+	58086812	58163254	117714	33780.3	102973	192198	151083	113767	120964	122666
chr10	93107250	93107829	Ntn4	chr10	+	93103793	93208717	34371	26077.1	42985.3	32219.8	42309.8	31795.2	39434.1	56369.9
chr10	88980879	88981319	Nr1h4	chr10	-	88916978	88996367	194642	117446	224944	255654	257340	191278	189224	241021
chr1	52906330	52906708	Hibch	chr1	+	52901889	52977704	27281	11086	32885.8	26939	46030	34155.7	28267.6	40509.3
chr1	174757609	174758302	Apcs	chr1	-	174824091	174825185	1	8313.43	14766.8	15508.4	7379.31	5455.67	12712.8	5122.72
chr1	174510050	174510320	Slamf8	chr1	-	174511507	174520699	1845	4024.62	5660.15	3104.65	5190.61	3817.25	5525.04	6308.21
chr10	124806944	124807636	Slc16a7	chr10	-	124664540	124765591	62287	16686.4	42188.7	35803.3	42874.6	31510.6	39361.6	60222.9
chr1	162622832	162623458	Rabgap1l	chr1	-	162186702	162723069	202439	104852	221942	155985	256319	188086	221471	257010
chr1	162715663	162716230	Rabgap1l	chr1	-	162186702	162723069	202439	104852	221942	155985	256319	188086	221471	257010
chr1	162303356	162303779	Rabgap1l	chr1	-	162186702	162723069	202439	104852	221942	155985	256319	188086	221471	257010
chr10	107480551	107481044	Ppp1r12a	chr10	+	107599455	107714631	48987	23932.9	64794	45900.2	78179.9	57339.7	63495.2	74938.8
chr11	45694706	45695203	Clint1	chr11	+	45665465	45724127	58394	30715.1	61920.6	66869.2	69235.1	50517.4	62698.5	58301.6
chr1	190159529	190159793	Ush2a	chr1	+	190086716	190788918	199893	104473	219975	116885	210848	153834	193156	298715
chr1	161180526	161180868	Rfwd2	chr1	+	161162456	161277711	39731	10945	50499.5	39617.5	69728.5	50861.9	54102.5	54105.8
chr1	161163408	161163792	Rfwd2	chr1	+	161162456	161277711	39731	10945	50499.5	39617.5	69728.5	50861.9	54102.5	54105.8
chr1	4503939	4504226	Rfwd2	chr1	+	161162456	161277711	39731	10945	50499.5	39617.5	69728.5	50861.9	54102.5	54105.8
chr1	10366258	10366878	Cpa6	chr1	-	10314807	10710024	46729	23581.3	77488.7	31811.2	75346.4	54797.6	72067.1	101018
chr10	13150029	13150317	Phactr2	chr10	-	12927522	13194202	67969	44475.4	100675	58601.1	101002	73452.7	90125.5	128087
chr10	12951814	12952153	Phactr2	chr10	-	12927522	13194202	67969	44475.4	100675	58601.1	101002	73452.7	90125.5	128087
chr1	187289823	187290223	Slc30a10	chr1	+	187278726	187292640	4178	29471.6	24258.4	44823.4	22753.9	16542.8	16434.8	17247.1
chr10	124171427	124171753	4930503E24Rik	chr10	+	123906129	123961544	6845	2059.6	10480.6	5263.25	14226.5	10332.8	9816.95	15038.4
chr11	109890498	109891102	Grip1	chr10	+	118891369	119512649	207445	123295	219301	123719	206704	149672	202182	281476
chr10	66622719	66623120	Jmjd1c	chr10	+	66590005	66719074	50582	128535	104065	82981.3	121798	87867.7	95862.6	113606
chr11	22107932	22108197	Ehbp1	chr11	-	21905830	22185841	90861	38272.2	108882	73691.3	131284	94677.8	115415	128997
chr11	22076766	22077142	Ehbp1	chr11	-	21905830	22185841	90861	38272.2	108882	73691.3	131284	94677.8	115415	128997
chr1	163197029	163197396	Prdx6	chr1	-	163170242	163181297	92243	50236.7	52179.9	73115.1	73038.7	52661.3	49766.5	50339.3
chr1	163174899	163175378	Prdx6	chr1	-	163170242	163181297	92243	50236.7	52179.9	73115.1	73038.7	52661.3	49766.5	50339.3
chr1	167414893	167415379	Adcy10	chr1	+	167415313	167506904	25253	13288.3	31778.6	21412.4	35040.5	25111.8	26588.4	45596.1
chr10	87329171	87329680	Igf1	chr10	+	87321800	87399792	141655	106959	307074	235241	440749	315369	369231	204342
chr1	158114213	158114730	Fam163a	chr1	-	157923095	158135156	31358	22196.4	33712.5	17971.4	30926	22092.4	32069.8	42385.7
chr10	98301724	98302016	Atp2b1	chr10	+	98377785	98488777	57567	26146.8	65011	51157.9	66522.3	47496.6	64625.1	74219.2
chr10	98121212	98121483	Atp2b1	chr10	+	98377785	98488777	57567	26146.8	65011	51157.9	66522.3	47496.6	64625.1	74219.2
chr11	89547558	89547945	Ankfn1	chr11	-	89282399	89399869	44369	23300.6	37585.8	19425.4	36368.8	25783.9	34370.5	48752.8
chr11	105655993	105656255	Tanc2	chr11	+	105451299	105790617	56061	27359.6	95061.3	53238.4	116254	82366.2	93536.3	108473
chr11	105410647	105411167	Tanc2	chr11	+	105451299	105790617	56061	27359.6	95061.3	53238.4	116254	82366.2	93536.3	108473
chr11	56046149	56046433	Nmur2	chr11	-	55838491	55854489	7893	4329.63	4866.57	1811.67	4995.06	3538.01	3734.97	5725.45
chr1	67149992	67150458	Cps1	chr1	+	67169639	67277022	349218	225971	1.12519e+06	623053	2.04928e+06	1.44618e+06	993046	837399
chr1	67139095	67139552	Cps1	chr1	+	67169639	67277022	349218	225971	1.12519e+06	623053	2.04928e+06	1.44618e+06	993046	837399
chr1	71695152	71695507	Fn1	chr1	-	71632096	71699745	357788	1.16197e+06	867672	995950	544133	383436	620647	378725
chr11	107371327	107371477	Psmd12	chr11	+	107340841	107359350	16064	12565.2	16821.6	19465.7	24432.5	17134.8	15689.8	16094.5
chr1	8693399	8693750	Sntg1	chr1	-	8352741	9289811	94401	41346.9	162527	65502.1	175414	122872	150756	176591
chr1	155425361	155425871	Npl	chr1	-	155350145	155396844	15577	14460.1	19547	13971.1	17529	12270.3	16529.8	24706.6
chr1	188527374	188527731	Tgfb2	chr1	-	188447064	188529871	15813	24531.3	34605.2	20918.8	34235.3	23944.9	32651.6	44148.1
chr1	158582738	158583002	Tgfb2	chr1	-	188447064	188529871	15813	24531.3	34605.2	20918.8	34235.3	23944.9	32651.6	44148.1
chr1	20553083	20553342	Pkhd1	chr1	-	20047859	20608138	109451	36099.3	138393	69232	152819	106518	122985	182732
chr1	66824525	66824929	1110028C15Rik	chr1	-	66765816	66864169	47148	38312.4	71581.1	59925.1	91378.1	63523.7	87719	76181.7
chr1	189455300	189455798	Esrrg	chr1	+	189821737	190038763	49325	41172.9	75708.5	46927.8	81828.5	56686.2	67324.5	99905.6
chr1	189580408	189580865	Esrrg	chr1	+	189821737	190038763	49325	41172.9	75708.5	46927.8	81828.5	56686.2	67324.5	99905.6
chr1	92823260	92823527	Mlph	chr1	+	92811676	92847719	28557	20530.4	18003.6	14870.4	20028	13869.8	14096.6	23637.5
chr1	165269123	165269576	Prrx1	chr1	-	165175249	165243781	10238	7319.57	20366.2	10472.8	21277.4	14639.6	18608	26969.8
chr1	60203862	60204143	Carf	chr1	+	60155124	60207878	15259	6003.98	15274	8303.58	17835.6	12247	11938.2	19447.6
chr10	52590840	52591329	Slc35f1	chr10	+	52410306	52831428	67025	28255.1	102960	45753.5	113279	77722.1	97589.9	132553
chr10	99436906	99437366	Kitl	chr10	+	99478457	99563046	10857	13316.2	29595.3	18039.8	28513.8	19547.6	26667.1	40357.1
chr10	127263509	127264023	Rdh18-ps	chr10	+	127261271	127283621	5665	2995.32	5965.13	3429.71	10375.7	7094.09	6595.4	7004.11
chr10	42443686	42444174	Sec63	chr10	+	42481301	42552320	43203	26594.7	60899.6	64548.1	79060.8	53849.6	66509.4	54859.5
chr10	42474096	42474492	Sec63	chr10	+	42481301	42552320	43203	26594.7	60899.6	64548.1	79060.8	53849.6	66509.4	54859.5
chr10	42488424	42488726	Sec63	chr10	+	42481301	42552320	43203	26594.7	60899.6	64548.1	79060.8	53849.6	66509.4	54859.5
chr11	90175869	90176263	Mmd	chr11	+	90110789	90139887	34929	22447.7	39028.7	65809.3	38755.1	26045.6	36324.5	48644.3
chr10	123007776	123008174	Fam19a2	chr10	+	122701131	123178035	112573	42698.7	131992	68749.7	142751	95642.1	121404	179252
chr10	123280579	123281102	Fam19a2	chr10	+	122701131	123178035	112573	42698.7	131992	68749.7	142751	95642.1	121404	179252
chr11	21302599	21303216	Ugp2	chr11	-	21221144	21270882	74238	40798.6	76307	74422.3	88640.9	58827	73076.4	94434
chr1	152103445	152103959	Pdc	chr1	+	152166546	152181036	1653	656.008	2710.19	1528.75	3093.5	2048.74	1821.76	3208.47
chr1	128725562	128725919	Nckap5	chr1	-	127810212	128727209	205321	128096	305767	185647	331040	219201	269865	411546
chr1	130996691	130997112	Thsd7b	chr1	+	131169880	132115855	118001	50402.4	201938	85305	212889	140830	195828	253954
chr1	130939542	130939975	Thsd7b	chr1	+	131169880	132115855	118001	50402.4	201938	85305	212889	140830	195828	253954
chr11	25870563	25870975	5730522E02Rik	chr11	-	25516845	26110576	91281	72323	165183	95973.8	194373	127546	155157	210121
chr11	26003676	26004036	5730522E02Rik	chr11	-	25516845	26110576	91281	72323	165183	95973.8	194373	127546	155157	210121
chr1	99289187	99289583	Slco6c1	chr1	-	98956025	99024880	5665	1591.73	9580.36	3961.83	11010.3	7168.1	9166.21	12232.7
chr1	133470186	133470720	Avpr1b	chr1	+	133495690	133508577	4721	4211.76	4766.7	4273.4	5292.72	3444.93	4936.42	4468
chr1	84406145	84406505	Dner	chr1	-	84366413	84692796	74064	47816.6	95661.4	52395.2	98609.3	64128.7	83966.3	127873
chr10	104748107	104748483	Tmtc2	chr10	-	104624719	105011535	94191	64796.2	148593	90705.3	158620	102475	131969	185284
chr10	105004931	105005246	Tmtc2	chr10	-	104624719	105011535	94191	64796.2	148593	90705.3	158620	102475	131969	185284
chr1	84958987	84959488	Slc16a14	chr1	-	84903279	84931658	13689	7815.3	11375.3	7838.87	8783.69	5667.39	10073.7	14026.4
chr1	164917611	164918066	Fmo3	chr1	-	164883930	164914622	6137	2581.61	7229.36	3212.52	8634.2	5543.79	5158.87	9994.45
chr1	57831025	57831349	Fmo3	chr1	-	164883930	164914622	6137	2581.61	7229.36	3212.52	8634.2	5543.79	5158.87	9994.45
chr1	164896280	164896802	Fmo3	chr1	-	164883930	164914622	6137	2581.61	7229.36	3212.52	8634.2	5543.79	5158.87	9994.45
chr1	84868593	84869068	Fbxo36	chr1	+	84836415	84897061	37682	16563.7	33439.8	27066.6	33785.8	21633.1	30399.7	39630.4
chr1	166150123	166150598	Slc19a2	chr1	+	166179185	166195499	43848	11013.5	40916.8	47251.9	72216.8	46201.8	47134.7	50417.5
chr1	166181731	166182169	Slc19a2	chr1	+	166179185	166195499	43848	11013.5	40916.8	47251.9	72216.8	46201.8	47134.7	50417.5
chr1	166165298	166165785	Slc19a2	chr1	+	166179185	166195499	43848	11013.5	40916.8	47251.9	72216.8	46201.8	47134.7	50417.5
chr1	4313081	4313353	Rp1	chr1	-	4280926	4399322	11565	5380.43	22360.8	8912.27	23384.2	14928.4	18586	29935.2
chr10	27948014	27948316	Ptprk	chr10	+	27794625	28317203	150333	64198.5	232021	167202	325268	207005	236588	281621
chr10	27991713	27992378	Ptprk	chr10	+	27794625	28317203	150333	64198.5	232021	167202	325268	207005	236588	281621
chr10	27837390	27837712	Ptprk	chr10	+	27794625	28317203	150333	64198.5	232021	167202	325268	207005	236588	281621
chr10	27886918	27887192	Ptprk	chr10	+	27794625	28317203	150333	64198.5	232021	167202	325268	207005	236588	281621
chr1	179643497	179643757	1700016C15Rik	chr1	+	179659944	179683436	1181	4586.05	8299.62	4471.08	6495.25	4125.48	5856.55	11937.8
chr11	54212310	54212828	4930404A10Rik	chr11	+	54184153	54240257	12273	5615.35	12211.4	6564.66	18496.2	11735.1	11627.2	14311.7
chr10	67520373	67521118	Rtkn2	chr10	+	67442345	67506612	29501	19693.8	26925.2	16865.7	26039.8	16476	24968.4	32631
chr1	22594706	22595138	Rims1	chr1	-	22278502	22812563	88973	35854.8	117506	50160.5	138426	87186.4	113768	149422
chr1	22846079	22846438	Rims1	chr1	-	22278502	22812563	88973	35854.8	117506	50160.5	138426	87186.4	113768	149422
chr1	177459954	177460334	Rgs7	chr1	-	176989206	177422676	80713	33031.3	114730	48695.4	116127	73119.3	106016	144863
chr11	45014250	45015068	Abca8a	chr11	-	109886947	109957251	45622	8516.1	33576.1	23555.3	50525.1	31711.6	41164.6	41409.5
chr10	115515541	115516099	Ptprr	chr10	+	115455418	115711985	44605	34154.6	74844.1	37198.9	73185.6	45889	71135.4	97609
chr10	64400595	64400947	Ctnna3	chr10	+	62892845	64466415	228685	113598	365270	167035	389021	243496	339877	483976
chr10	63060276	63060587	Ctnna3	chr10	+	62892845	64466415	228685	113598	365270	167035	389021	243496	339877	483976
chr10	62878149	62878489	Ctnna3	chr10	+	62892845	64466415	228685	113598	365270	167035	389021	243496	339877	483976
chr10	62892075	62892416	Ctnna3	chr10	+	62892845	64466415	228685	113598	365270	167035	389021	243496	339877	483976
chr11	107059613	107060955	Ctnna3	chr10	+	62892845	64466415	228685	113598	365270	167035	389021	243496	339877	483976
chr10	114174188	114174617	Trhde	chr10	-	113835876	114238426	63249	21123.7	88650.8	35436.4	92085.1	57337.8	91030.9	108397
chr11	9818592	9819000	Abca13	chr11	+	9091944	9584262	69857	33125.7	106260	48153.4	111427	69251.9	98081.7	143477
chr1	141557329	141557837	Cfhr1	chr1	-	141443640	141456799	3168	834.393	10016.9	8241.46	15003.4	9318.84	9901.81	12284.7
chr1	141456676	141457070	Cfhr1	chr1	-	141443640	141456799	3168	834.393	10016.9	8241.46	15003.4	9318.84	9901.81	12284.7
chr1	59828699	59829102	Bmpr2	chr1	+	59821480	59927703	23129	11146.1	41314.1	29615.5	50346.9	30939.1	43705.5	47284.1
chr1	61626488	61626743	Pard3b	chr1	+	61685397	62688858	201781	89603.7	293134	157247	353770	216078	274781	382536
chr1	62007139	62007428	Pard3b	chr1	+	61685397	62688858	201781	89603.7	293134	157247	353770	216078	274781	382536
chr10	34349591	34349857	Frk	chr10	+	34203205	34331036	18297	7482.42	29299.1	15392.6	39074.6	23774.7	26343.6	35508.6
chr11	73206232	73206597	Olfr1	chr11	-	73208577	73212997	1	198.896	540.191	114.167	866.899	526.668	307.951	923.184
chr10	23570931	23571394	Vnn3	chr10	+	23571267	23589649	7553	3853.4	7317.96	8825.83	11343.2	6888.86	7711.98	8023.63
chr1	118145103	118145366	Cntnap5a	chr1	+	117581713	118477251	126733	42389.4	191694	78538.6	203054	122726	177195	249878
chr1	117001648	117002035	Cntnap5a	chr1	+	117581713	118477251	126733	42389.4	191694	78538.6	203054	122726	177195	249878
chr1	15266758	15267179	Kcnb2	chr1	+	15302532	15704295	58372	29375.2	101559	45038.4	108566	65490.6	90821.1	132251
chr1	171967412	171967713	Ddr2	chr1	-	171902437	172019075	42481	20245.7	44107.5	23507.9	43790.8	26363.8	41244.4	55900.7
chr1	132530422	132530837	Zp3r	chr1	-	132473282	132526183	6845	3463.18	9964.37	4357.92	9896.99	5958.07	8417.97	13307.2
chr1	152313188	152313574	Prg4	chr1	-	152296541	152313295	5307	19339.5	18747.7	10839	20917.1	12554.5	29055.9	12356.3
chr1	94614807	94615121	Otos	chr1	-	94540794	94545418	1889	4453.86	2989.09	3146.07	3901.5	2327.98	2736.48	2994.67
chr1	176702106	176702473	Fmn2	chr1	+	176431955	176752860	65373	24393.2	87119.7	40477.8	106939	63450.1	78303.6	114518
chr1	14304774	14304931	Eya1	chr1	-	14159038	14300280	29029	17686.2	41721.6	19727.1	43481.5	25798.8	37338.9	54186.1
chr1	69079697	69080070	Erbb4	chr1	-	68086539	69154633	132663	53269.7	234592	112160	308472	182800	247884	281543
chr1	142303291	142303791	Kcnt2	chr1	+	142142833	142506838	40829	20973.6	98186.5	51152.3	121335	71858.1	103534	110224
chr1	163310163	163310643	Tnfsf4	chr1	+	163325568	163348337	2597	1966.02	5264.6	2714.83	7546.7	4468.8	5007.92	6980.82
chr10	108736739	108737264	Syt1	chr10	-	107935313	108447675	79297	42369.1	148263	64799.5	176229	104330	142479	198219
chr11	92288383	92288740	Car10	chr11	+	92960603	93463065	89209	41472	139934	60587.8	146490	86471.6	128358	184447
chr1	60881665	60882038	Cd28	chr1	+	60803231	60830203	8271	1966.02	8533.96	3729.96	10411.3	6144.23	7299.22	11368.4
chr1	21888719	21889257	Kcnq5	chr1	-	21388483	21952023	75757	31965.8	132464	52947.1	137639	81010.8	123276	175177
chr1	21558655	21559052	Kcnq5	chr1	-	21388483	21952023	75757	31965.8	132464	52947.1	137639	81010.8	123276	175177
chr10	57379082	57379411	Pkib	chr10	+	57351786	57460918	16049	6216.21	25475.4	12100.2	32218.8	18787.7	22244.1	37119.2
chr1	151891826	151892148	7530420F21Rik	chr1	-	151923790	151946896	2597	2059.2	4827.38	2275.65	6819.76	3974.41	3900.73	7613.08
chr1	196844208	196844580	A330023F24Rik	chr1	+	196843592	196864102	32489	13994.3	30524.9	34876.5	38225.1	22052.8	24120.9	31616.1
chr1	196842798	196843184	A330023F24Rik	chr1	+	196843592	196864102	32489	13994.3	30524.9	34876.5	38225.1	22052.8	24120.9	31616.1
chr10	29690654	29690965	A330023F24Rik	chr1	+	196843592	196864102	32489	13994.3	30524.9	34876.5	38225.1	22052.8	24120.9	31616.1
chr10	73838675	73839049	Pcdh15	chr10	+	73284614	74112477	109033	47255.1	172832	71975	201727	115692	158949	227317
chr10	73947543	73947784	Pcdh15	chr10	+	73284614	74112477	109033	47255.1	172832	71975	201727	115692	158949	227317
chr10	102241934	102242295	Alx1	chr10	-	102470480	102491411	4102	2506.36	4638.39	1985.27	5544.34	3167.6	5126.01	4958.83
chr1	31252891	31253307	Lgsn	chr1	+	31233279	31261570	5665	2741.28	6841.28	3282.83	9637.75	5492.67	5769.16	7382.22
chr1	31144681	31145092	Lgsn	chr1	+	31233279	31261570	5665	2741.28	6841.28	3282.83	9637.75	5492.67	5769.16	7382.22
chr1	31129822	31130310	Lgsn	chr1	+	31233279	31261570	5665	2741.28	6841.28	3282.83	9637.75	5492.67	5769.16	7382.22
chr11	54981906	54982366	Slc36a2	chr11	-	54971969	54998579	13453	9638.97	13066	7041.89	12195.7	6881.99	13802.6	15834.1
chr1	70214401	70214979	Spag16	chr1	+	69873561	70771706	118408	48190.9	193791	79651	222788	123913	185133	250186
chr1	172996584	172996995	Fcgr3	chr1	-	172981299	172989534	1	2952.32	6093.31	3989.76	4911.36	2706.78	4885.86	7607.67
chr1	172994193	172994530	Fcgr3	chr1	-	172981299	172989534	1	2952.32	6093.31	3989.76	4911.36	2706.78	4885.86	7607.67
chr1	173010620	173010913	Fcgr3	chr1	-	172981299	172989534	1	2952.32	6093.31	3989.76	4911.36	2706.78	4885.86	7607.67
chr10	57207544	57207822	Hsf2	chr10	+	57206190	57232949	15529	5792.14	21736.5	27658.4	36751.7	20243.8	25275.4	26632.5
chr10	57219060	57219685	Hsf2	chr10	+	57206190	57232949	15529	5792.14	21736.5	27658.4	36751.7	20243.8	25275.4	26632.5
chr1	149616812	149617091	Fam5c	chr1	+	148342795	148749602	24781	12539.7	63876.6	22804.1	82570.7	45144.4	66024.4	73493.3
chr1	149371407	149371673	Fam5c	chr1	+	148342795	148749602	24781	12539.7	63876.6	22804.1	82570.7	45144.4	66024.4	73493.3
chr1	148670715	148670994	Fam5c	chr1	+	148342795	148749602	24781	12539.7	63876.6	22804.1	82570.7	45144.4	66024.4	73493.3
chr1	160898604	160899040	Pappa2	chr1	-	160641861	160887569	32661	22696.5	70342.3	29230.3	81210	44117.5	69126.8	88148.9
chr1	85109343	85110005	A530032D15Rik	chr1	-	85084713	85106428	2361	1311.02	2343.87	510.25	1856.5	1000.46	2122.58	3126.94
chr1	85100793	85101267	A530032D15Rik	chr1	-	85084713	85106428	2361	1311.02	2343.87	510.25	1856.5	1000.46	2122.58	3126.94
chr1	85106041	85106591	A530032D15Rik	chr1	-	85084713	85106428	2361	1311.02	2343.87	510.25	1856.5	1000.46	2122.58	3126.94
chr1	85085379	85086016	A530032D15Rik	chr1	-	85084713	85106428	2361	1311.02	2343.87	510.25	1856.5	1000.46	2122.58	3126.94
chr1	85078988	85079368	A530032D15Rik	chr1	-	85084713	85106428	2361	1311.02	2343.87	510.25	1856.5	1000.46	2122.58	3126.94
chr1	85088732	85089164	A530032D15Rik	chr1	-	85084713	85106428	2361	1311.02	2343.87	510.25	1856.5	1000.46	2122.58	3126.94
chr1	85077178	85077862	A530032D15Rik	chr1	-	85084713	85106428	2361	1311.02	2343.87	510.25	1856.5	1000.46	2122.58	3126.94
chr1	85144356	85144961	A530032D15Rik	chr1	-	85084713	85106428	2361	1311.02	2343.87	510.25	1856.5	1000.46	2122.58	3126.94
chr10	28731602	28732082	2310057J18Rik	chr10	-	28692093	28706112	945	633.71	2810.59	1444.48	3279.05	1757.68	2462.03	4154.78
chr1	60350408	60350667	Nbeal1	chr1	+	60237442	60391549	29354	14832.4	67577.9	52499.2	89662.4	47811.3	75323.3	69955.6
chr1	60350920	60351346	Nbeal1	chr1	+	60237442	60391549	29354	14832.4	67577.9	52499.2	89662.4	47811.3	75323.3	69955.6
chr10	26853537	26853875	Lama2	chr10	-	26701091	27336748	75285	30901.8	136227	54956.2	160020	84026.7	125557	182525
chr1	197052818	197053345	Cr2	chr1	-	196963004	197002909	8025	1877.63	9584.95	4502.14	11067.7	5727.66	9376.74	13080.9
chr10	102131156	102131713	Rassf9	chr10	+	101974855	102009194	1417	843.153	8978.78	3663.51	10841.9	5585.75	10608.9	10693.3
chr1	105491490	105491754	Cdh20	chr1	+	106665395	106892058	37761	17077.4	59183.1	25732.4	64186.5	32830.9	53634.4	78354.2
chr1	106858923	106859316	Cdh20	chr1	+	106665395	106892058	37761	17077.4	59183.1	25732.4	64186.5	32830.9	53634.4	78354.2
chr1	105512368	105512630	Cdh20	chr1	+	106665395	106892058	37761	17077.4	59183.1	25732.4	64186.5	32830.9	53634.4	78354.2
chr1	51185982	51186253	Tmeff2	chr1	+	50984366	51244114	27141	13908.7	66450.9	28649.5	79070.3	37956.3	61590.3	89330.2
chr1	49664316	49664588	Tmeff2	chr1	+	50984366	51244114	27141	13908.7	66450.9	28649.5	79070.3	37956.3	61590.3	89330.2
chr11	48748693	48749141	Gm12185	chr11	-	48718157	48740661	3541	1362.38	3302.33	1472.17	4304.97	2004.87	2022.55	5259.57
chr1	171679717	171680179	Rgs4	chr1	-	171671607	171677773	3896	2016.99	3418.32	2148.04	4125.21	1919.04	2784.51	4672.24
chr1	146505687	146505949	Rgs18	chr1	-	146599970	146622551	2389	936.725	3157.64	1564.87	6105.99	2570.6	3395.52	4163.52
chr1	145999530	145999944	Rgs13	chr1	-	145985796	146024502	4013	843.153	6926.21	2444.92	9216.64	3835.94	7891.82	7511.58
chr1	53117245	53117687	Mstn	chr1	+	53118506	53124923	4485	721.309	1350.29	340.5	2464.73	1024.87	1723.54	1117.44
chr1	87509502	87509949	Sp140	chr1	+	87497277	87541611	2361	843.153	4586.09	1632.77	3588.3	1490.27	3734.97	7410.09
chr1	87520372	87520896	Sp140	chr1	+	87497277	87541611	2361	843.153	4586.09	1632.77	3588.3	1490.27	3734.97	7410.09
chr1	144919170	144919423	B3galt2	chr1	+	145487826	145497067	1	274.55	3766.56	2750.71	4656.33	1739.75	4138.34	3673.1
chr1	144058048	144058433	B3galt2	chr1	+	145487826	145497067	1	274.55	3766.56	2750.71	4656.33	1739.75	4138.34	3673.1
chr1	65887576	65888018	Crygf	chr1	+	65973095	65974878	1	94.5725	396.154	227.333	777.414	265.36	340.452	783.422
chr10	87378471	87378968	Tyms-ps	chr10	+	87429415	87430762	1	94.5725	244.776	1	689.772	213.098	149.059	82.1123
chr1	56377138	56377437	Hsfy2	chr1	-	56692892	56694295	1	194.516	198.511	227.333	473.692	94.0792	255.589	246.417
chr11	46458961	46459109	Gm4926	chr11	-	46450007	46458508	237	281.718	1799.83	849.75	560.018	94.0792	1733.29	2549.59
chr10	127213152	127213620	Rdh9	chr10	+	127213460	127229753	2361	749.58	3521.21	3589.83	6557.1	931.792	2886.34	5075.72
chr1	74239280	74239646	Cxcr1	chr1	-	74238359	74241205	1417	967.385	1211.36	1303.38	1057.19	94.0792	1189.44	1487.64
chr10	128827826	128828212	Olfr784	chr10	+	128824690	128825650	1	1	86.0596	114.889	37.0572	1	1	171.128
chr11	74142270	74142884	Olfr410	chr11	-	74147783	74148731	1	1	24.3291	1	98.3808	1	36.3897	28.4534
chr1	163126057	163126535	4930469G21Rik	chr1	-	163086973	163089445	1	562.435	749.367	588.022	336.306	1	1189.08	793.405
chr10	38044820	38045145	Rfpl4b	chr10	-	38540346	38541585	1	1	162.993	114.167	439.477	1	260.645	96.255

## Sheet: No_overlap_EGR1-36hrs
			NB: UNFILTERED PEAKS
chr.x	start.x	end.x	feature	chr.y	strand	start.y	end.y	X0_pol_body	X3_pol_body	X8_pol_body	X16_pol_body	X24_pol_body	X36_pol_body	X48_pol_body	X168_pol_body
chr17	15124357	15125353	9030025P20Rik	chr17	+	15115827	15128541	1653	468.863	317.254	283.917	1	1117.95	255.589	305.483
chr17	15127444	15128429	9030025P20Rik	chr17	+	15115827	15128541	1653	468.863	317.254	283.917	1	1117.95	255.589	305.483
chr17	15123310	15124200	9030025P20Rik	chr17	+	15115827	15128541	1653	468.863	317.254	283.917	1	1117.95	255.589	305.483
chr7	51435783	51436612	Klk1b24	chr7	+	51443632	51447821	1	94.5725	286.454	283.917	1	652.554	170.726	508.472
chr7	147902860	147904088	Olfr541	chr7	+	147890151	147891090	1	1	73.4776	140.652	1	415.279	1	11.815
chrX	67638430	67639392	1110012L19Rik	chrX	+	67639087	67642591	237	112.889	1016.08	559.128	1	366.45	1144.66	1022.18
chrX	8305909	8307567	Ssx9	chrX	+	8325555	8331713	1	1	158.537	1	1	280.238	170.726	305.483
chrX	122844107	122848952	4932411N23Rik	chrX	-	123346993	123350397	1	94.5725	127.737	283.917	1	280.238	85.863	203.989
chrX	122663025	122663981	4932411N23Rik	chrX	-	123346993	123350397	1	94.5725	127.737	283.917	1	280.238	85.863	203.989
chrX	122688843	122691686	4932411N23Rik	chrX	-	123346993	123350397	1	94.5725	127.737	283.917	1	280.238	85.863	203.989
chrX	122703362	122707088	4932411N23Rik	chrX	-	123346993	123350397	1	94.5725	127.737	283.917	1	280.238	85.863	203.989
chrX	122519076	122522042	4932411N23Rik	chrX	-	123346993	123350397	1	94.5725	127.737	283.917	1	280.238	85.863	203.989
chrX	122338126	122339365	4932411N23Rik	chrX	-	123346993	123350397	1	94.5725	127.737	283.917	1	280.238	85.863	203.989
chrX	122315148	122317085	4932411N23Rik	chrX	-	123346993	123350397	1	94.5725	127.737	283.917	1	280.238	85.863	203.989
chrX	122353043	122354828	4932411N23Rik	chrX	-	123346993	123350397	1	94.5725	127.737	283.917	1	280.238	85.863	203.989
chrX	122358169	122359753	4932411N23Rik	chrX	-	123346993	123350397	1	94.5725	127.737	283.917	1	280.238	85.863	203.989
chrX	122587150	122589211	4932411N23Rik	chrX	-	123346993	123350397	1	94.5725	127.737	283.917	1	280.238	85.863	203.989
chrX	122349050	122349882	4932411N23Rik	chrX	-	123346993	123350397	1	94.5725	127.737	283.917	1	280.238	85.863	203.989
chrX	122497822	122499527	4932411N23Rik	chrX	-	123346993	123350397	1	94.5725	127.737	283.917	1	280.238	85.863	203.989
chrX	122336329	122338120	4932411N23Rik	chrX	-	123346993	123350397	1	94.5725	127.737	283.917	1	280.238	85.863	203.989
chrX	122625758	122626906	4932411N23Rik	chrX	-	123346993	123350397	1	94.5725	127.737	283.917	1	280.238	85.863	203.989
chrX	122692030	122693770	4932411N23Rik	chrX	-	123346993	123350397	1	94.5725	127.737	283.917	1	280.238	85.863	203.989
chrX	122627706	122629025	4932411N23Rik	chrX	-	123346993	123350397	1	94.5725	127.737	283.917	1	280.238	85.863	203.989
chrX	122329305	122330157	4932411N23Rik	chrX	-	123346993	123350397	1	94.5725	127.737	283.917	1	280.238	85.863	203.989
chrX	122380168	122381479	4932411N23Rik	chrX	-	123346993	123350397	1	94.5725	127.737	283.917	1	280.238	85.863	203.989
chrX	122707777	122709471	4932411N23Rik	chrX	-	123346993	123350397	1	94.5725	127.737	283.917	1	280.238	85.863	203.989
chrX	122569802	122571063	4932411N23Rik	chrX	-	123346993	123350397	1	94.5725	127.737	283.917	1	280.238	85.863	203.989
chrX	122351010	122351961	4932411N23Rik	chrX	-	123346993	123350397	1	94.5725	127.737	283.917	1	280.238	85.863	203.989
chrX	122842084	122843227	4932411N23Rik	chrX	-	123346993	123350397	1	94.5725	127.737	283.917	1	280.238	85.863	203.989
chrX	122537627	122540316	4932411N23Rik	chrX	-	123346993	123350397	1	94.5725	127.737	283.917	1	280.238	85.863	203.989
chrX	122531900	122532867	4932411N23Rik	chrX	-	123346993	123350397	1	94.5725	127.737	283.917	1	280.238	85.863	203.989
chrX	122354948	122357077	4932411N23Rik	chrX	-	123346993	123350397	1	94.5725	127.737	283.917	1	280.238	85.863	203.989
chrX	122446408	122447424	4932411N23Rik	chrX	-	123346993	123350397	1	94.5725	127.737	283.917	1	280.238	85.863	203.989
chrX	122457925	122459046	4932411N23Rik	chrX	-	123346993	123350397	1	94.5725	127.737	283.917	1	280.238	85.863	203.989
chrX	122529607	122530502	4932411N23Rik	chrX	-	123346993	123350397	1	94.5725	127.737	283.917	1	280.238	85.863	203.989
chrX	122459174	122459911	4932411N23Rik	chrX	-	123346993	123350397	1	94.5725	127.737	283.917	1	280.238	85.863	203.989
chrX	122523362	122528912	4932411N23Rik	chrX	-	123346993	123350397	1	94.5725	127.737	283.917	1	280.238	85.863	203.989
chrX	122530899	122531885	4932411N23Rik	chrX	-	123346993	123350397	1	94.5725	127.737	283.917	1	280.238	85.863	203.989
chrX	122340718	122346808	4932411N23Rik	chrX	-	123346993	123350397	1	94.5725	127.737	283.917	1	280.238	85.863	203.989
chrX	122647819	122655539	4932411N23Rik	chrX	-	123346993	123350397	1	94.5725	127.737	283.917	1	280.238	85.863	203.989
chrX	122440509	122441599	4932411N23Rik	chrX	-	123346993	123350397	1	94.5725	127.737	283.917	1	280.238	85.863	203.989
chrX	122670331	122674535	4932411N23Rik	chrX	-	123346993	123350397	1	94.5725	127.737	283.917	1	280.238	85.863	203.989
chrX	122553640	122554277	4932411N23Rik	chrX	-	123346993	123350397	1	94.5725	127.737	283.917	1	280.238	85.863	203.989
chrX	122313753	122315039	4932411N23Rik	chrX	-	123346993	123350397	1	94.5725	127.737	283.917	1	280.238	85.863	203.989
chrX	122686129	122686968	4932411N23Rik	chrX	-	123346993	123350397	1	94.5725	127.737	283.917	1	280.238	85.863	203.989
chrX	122655585	122657408	4932411N23Rik	chrX	-	123346993	123350397	1	94.5725	127.737	283.917	1	280.238	85.863	203.989
chrX	122666950	122669434	4932411N23Rik	chrX	-	123346993	123350397	1	94.5725	127.737	283.917	1	280.238	85.863	203.989
chrX	122575870	122577818	4932411N23Rik	chrX	-	123346993	123350397	1	94.5725	127.737	283.917	1	280.238	85.863	203.989
chrX	122330392	122335903	4932411N23Rik	chrX	-	123346993	123350397	1	94.5725	127.737	283.917	1	280.238	85.863	203.989
chrX	122582663	122583422	4932411N23Rik	chrX	-	123346993	123350397	1	94.5725	127.737	283.917	1	280.238	85.863	203.989
chrX	122496416	122497800	4932411N23Rik	chrX	-	123346993	123350397	1	94.5725	127.737	283.917	1	280.238	85.863	203.989
chrX	122312313	122313448	4932411N23Rik	chrX	-	123346993	123350397	1	94.5725	127.737	283.917	1	280.238	85.863	203.989
chrX	122695045	122696930	4932411N23Rik	chrX	-	123346993	123350397	1	94.5725	127.737	283.917	1	280.238	85.863	203.989
chrX	122452588	122454055	4932411N23Rik	chrX	-	123346993	123350397	1	94.5725	127.737	283.917	1	280.238	85.863	203.989
chrX	122632313	122633025	4932411N23Rik	chrX	-	123346993	123350397	1	94.5725	127.737	283.917	1	280.238	85.863	203.989
chrX	122696938	122697734	4932411N23Rik	chrX	-	123346993	123350397	1	94.5725	127.737	283.917	1	280.238	85.863	203.989
chrX	122494679	122495829	4932411N23Rik	chrX	-	123346993	123350397	1	94.5725	127.737	283.917	1	280.238	85.863	203.989
chrX	122710850	122713646	4932411N23Rik	chrX	-	123346993	123350397	1	94.5725	127.737	283.917	1	280.238	85.863	203.989
chrX	122536571	122537419	4932411N23Rik	chrX	-	123346993	123350397	1	94.5725	127.737	283.917	1	280.238	85.863	203.989
chrX	122636616	122637487	4932411N23Rik	chrX	-	123346993	123350397	1	94.5725	127.737	283.917	1	280.238	85.863	203.989
chrX	122665592	122666948	4932411N23Rik	chrX	-	123346993	123350397	1	94.5725	127.737	283.917	1	280.238	85.863	203.989
chrX	122697736	122701989	4932411N23Rik	chrX	-	123346993	123350397	1	94.5725	127.737	283.917	1	280.238	85.863	203.989
chrX	122541156	122542576	4932411N23Rik	chrX	-	123346993	123350397	1	94.5725	127.737	283.917	1	280.238	85.863	203.989
chrX	122511893	122518714	4932411N23Rik	chrX	-	123346993	123350397	1	94.5725	127.737	283.917	1	280.238	85.863	203.989
chrX	122637527	122646528	4932411N23Rik	chrX	-	123346993	123350397	1	94.5725	127.737	283.917	1	280.238	85.863	203.989
chrX	122346866	122347954	4932411N23Rik	chrX	-	123346993	123350397	1	94.5725	127.737	283.917	1	280.238	85.863	203.989
chr3	22304668	22305353	Rprl2	chr3	+	22149862	22150561	1	1	67.7108	97.312	1	214.624	128.836	1
chr17	16997622	16998410	Zfp960	chr17	+	17201066	17226595	89	1	59.716	114.167	1	205.469	15.4448	170.712
chr17	17141509	17142654	Zfp960	chr17	+	17201066	17226595	89	1	59.716	114.167	1	205.469	15.4448	170.712
chr17	17087777	17089071	Zfp960	chr17	+	17201066	17226595	89	1	59.716	114.167	1	205.469	15.4448	170.712
chr17	17200542	17201776	Zfp960	chr17	+	17201066	17226595	89	1	59.716	114.167	1	205.469	15.4448	170.712
chr17	15145843	15147620	Gm3435	chr17	+	15146803	15159413	1	94.5725	63.779	57.5833	1	187.158	85.863	102.494
chr17	15155578	15156869	Gm3435	chr17	+	15146803	15159413	1	94.5725	63.779	57.5833	1	187.158	85.863	102.494
chr7	6574940	6576035	Olfr1350	chr7	+	6522703	6523630	1	489.966	329.312	101.405	1	125.36	340.452	483.93
chr7	6560853	6561964	Olfr1350	chr7	+	6522703	6523630	1	489.966	329.312	101.405	1	125.36	340.452	483.93
chr7	6570211	6573911	Olfr1350	chr7	+	6522703	6523630	1	489.966	329.312	101.405	1	125.36	340.452	483.93
chr7	6564180	6565290	Olfr1350	chr7	+	6522703	6523630	1	489.966	329.312	101.405	1	125.36	340.452	483.93
chr7	6562659	6564064	Olfr1350	chr7	+	6522703	6523630	1	489.966	329.312	101.405	1	125.36	340.452	483.93
chr10	21753523	21756633	4930444G20Rik	chr10	-	21786112	21787885	1	1	127.737	1	1	94.0792	85.863	203.989
chr13	62038379	62039097	BC052688	chr13	+	61872939	61888642	1	1	223.675	57.5833	1	94.0792	85.863	305.483
chr12	89401704	89402767	Gm10436	chr12	-	89414032	89420338	1	1	31.7997	1	1	94.0792	85.863	1
chr4	60694190	60695869	Mup11	chr4	-	60671338	60675267	1	1	139.271	57.5833	1	94.0792	85.5019	342.504
chr4	60684230	60685371	Mup11	chr4	-	60671338	60675267	1	1	139.271	57.5833	1	94.0792	85.5019	342.504
chr3	93468644	93469378	Tdpoz1	chr3	-	93473254	93480205	1417	94.5725	212.666	1	1	94.0792	1	406.977
chr7	34816767	34817585	Abpa	chr7	+	34806585	34807900	1	270.967	350.413	144.023	1	94.0792	589.986	203.989
chr7	12595461	12597503	Vmn1r77	chr7	+	12626647	12627568	1	1	4.40763	1	1	75.0056	1	11.815
chr7	12615118	12616443	Vmn1r77	chr7	+	12626647	12627568	1	1	4.40763	1	1	75.0056	1	11.815
chr14	106492013	106493107	Trim52	chr14	+	106505414	106508497	834	1787.24	1010.84	601.746	62.85	3427.76	1073.89	1291.31
chr17	7165569	7166419	Tagap1	chr17	-	7159313	7165505	1815	2314.03	687.506	1390.78	40.4787	1385.74	761.878	530.934
chr6	73469531	73470650	4931417E11Rik	chr6	-	73418575	73419661	1	206.461	213.321	184.474	1	23.1254	143.281	197.749
chr2	173532814	173533802	1700010B08Rik	chr2	+	173544915	173547587	237	701.799	1210.84	422.365	43.637	633.099	1131.66	1421.92
chr5	27829515	27830277	Speer4b	chr5	-	27822348	27827932	1	1	566.666	153.173	62.85	838.713	414.12	609.966
chr5	27826347	27828346	Speer4b	chr5	-	27822348	27827932	1	1	566.666	153.173	62.85	838.713	414.12	609.966
chr10	29690220	29691375	Cenpw	chr10	-	29915814	29920346	1	2306.07	2761.57	1920.98	816.893	10003.6	3890.62	2141.95
chr10	29808705	29809804	Cenpw	chr10	-	29915814	29920346	1	2306.07	2761.57	1920.98	816.893	10003.6	3890.62	2141.95
chr19	44454214	44455480	Scd1	chr19	-	44468939	44482199	8932	273742	13791.4	7143.98	10514.4	111167	14194.4	17085.7
chr19	44461546	44462645	Scd1	chr19	-	44468939	44482199	8932	273742	13791.4	7143.98	10514.4	111167	14194.4	17085.7
chr5	138648110	138649158	Mblac1	chr5	+	138635541	138636628	1490	1104.36	739.406	1539.58	319.988	2887.6	658.959	917.777
chr19	61261842	61262703	Gm7102	chr19	-	61250588	61252212	473	281.718	191.696	57.5833	62.85	559.475	85.863	203.989
chr5	146663302	146665159	Cyp3a11	chr5	-	146666182	146691430	124446	16848	69137.9	103251	90778.3	736838	83476.3	102837
chr5	146674777	146676906	Cyp3a11	chr5	-	146666182	146691430	124446	16848	69137.9	103251	90778.3	736838	83476.3	102837
chr5	146669501	146670915	Cyp3a11	chr5	-	146666182	146691430	124446	16848	69137.9	103251	90778.3	736838	83476.3	102837
chr5	146715802	146716880	Cyp3a11	chr5	-	146666182	146691430	124446	16848	69137.9	103251	90778.3	736838	83476.3	102837
chr5	146689115	146692026	Cyp3a11	chr5	-	146666182	146691430	124446	16848	69137.9	103251	90778.3	736838	83476.3	102837
chr5	146722949	146723816	Cyp3a11	chr5	-	146666182	146691430	124446	16848	69137.9	103251	90778.3	736838	83476.3	102837
chr5	146708471	146709398	Cyp3a11	chr5	-	146666182	146691430	124446	16848	69137.9	103251	90778.3	736838	83476.3	102837
chr5	146692420	146693560	Cyp3a11	chr5	-	146666182	146691430	124446	16848	69137.9	103251	90778.3	736838	83476.3	102837
chr5	146672260	146674660	Cyp3a11	chr5	-	146666182	146691430	124446	16848	69137.9	103251	90778.3	736838	83476.3	102837
chr5	146665378	146666213	Cyp3a11	chr5	-	146666182	146691430	124446	16848	69137.9	103251	90778.3	736838	83476.3	102837
chr5	146678712	146680909	Cyp3a11	chr5	-	146666182	146691430	124446	16848	69137.9	103251	90778.3	736838	83476.3	102837
chr5	146711898	146712871	Cyp3a11	chr5	-	146666182	146691430	124446	16848	69137.9	103251	90778.3	736838	83476.3	102837
chr5	146680916	146687501	Cyp3a11	chr5	-	146666182	146691430	124446	16848	69137.9	103251	90778.3	736838	83476.3	102837
chr5	146667203	146667891	Cyp3a11	chr5	-	146666182	146691430	124446	16848	69137.9	103251	90778.3	736838	83476.3	102837
chr5	146720099	146720897	Cyp3a11	chr5	-	146666182	146691430	124446	16848	69137.9	103251	90778.3	736838	83476.3	102837
chr13	21871243	21872733	Hist1h1b	chr13	-	21871751	21872423	2455	1802.37	7072.35	3165.57	4219.17	32045.8	14567.1	3804.54
chr7	54006559	54010598	Saa2	chr7	+	54007202	54009684	945	458550	168101	22202.1	6053.08	43868.8	73059.8	17558.7
chr2	50837719	50838791	Gm13498	chr2	+	50765203	50767366	1	268.578	342.156	459.686	62.85	446.559	216.588	467.292
chr3	96047593	96051606	Hist2h2aa1	chr3	-	96043638	96044216	1	1	32.0618	39.0432	21.7921	151.681	58.0569	1
chr11	82799054	82800092	Slfn9	chr11	-	82793804	82805332	6137	1764.94	3920.29	2490.42	2106.53	13589.4	4276.65	5556.57
chr7	54000885	54002418	Saa1	chr7	-	53995868	53998350	1	387326	133517	27285.7	9725.66	59174.9	66489.9	15510.1
chr7	53994262	53998830	Saa1	chr7	-	53995868	53998350	1	387326	133517	27285.7	9725.66	59174.9	66489.9	15510.1
chr17	6428689	6429840	Dynlt1b	chr17	+	6429259	6435443	1	106.12	48.9689	114.167	62.85	373.317	85.863	55.4908
chr17	35108286	35109402	Hspa1a	chr17	-	35106303	35109101	1	264.994	223.151	233.594	62.5868	361.491	180.115	305.483
chr13	23842721	23843666	Hist1h2ab	chr13	+	23842956	23843462	29	3.78727	30.0959	9.90886	17.5811	91.7904	51.5567	21.3821
chr9	21568337	21569445	Spc24	chr9	-	21559885	21564730	10308	5187.31	5089.63	3352.9	5027.43	25398.6	7372.17	5336.94
chr9	21566143	21567257	Spc24	chr9	-	21559885	21564730	10308	5187.31	5089.63	3352.9	5027.43	25398.6	7372.17	5336.94
chr2	84510346	84511353	2700094K13Rik	chr2	-	84509377	84510865	3772	6475.42	3849.91	4424.37	2422.1	12163.1	6275.09	2017.99
chr13	24870276	24871211	Gmnn	chr13	-	24843713	24853806	10887	10475.6	10940.3	13991.8	9439.57	44881.6	15161.9	8539
chr3	94175105	94176301	Rorc	chr3	+	94176747	94202161	57005	36928.7	51797.2	139615	30340.4	130267	32861.8	36609.7
chr5	147001276	147002429	1700001J03Rik	chr5	-	146994025	146996880	1	435.416	438.225	566.833	186.55	745.633	85.1408	745.985
chr10	68762402	68763301	Cdk1	chr10	-	68799382	68815660	11201	10049.9	21849.6	10365.4	14686.8	56730.9	33168	18209.3
chr7	142895580	142896526	Mki67	chr7	-	142881470	142908062	7789	4909.38	13349.1	5319.83	7454.58	28081.2	16074.8	16072.5
chr7	142949511	142950538	Mki67	chr7	-	142881470	142908062	7789	4909.38	13349.1	5319.83	7454.58	28081.2	16074.8	16072.5
chr19	37941332	37942553	Cyp26a1	chr19	+	37772297	37776026	8025	3488.67	3415.83	5484.77	5451.43	20493.3	3871.12	3354.47
chr19	37776549	37778305	Cyp26a1	chr19	+	37772297	37776026	8025	3488.67	3415.83	5484.77	5451.43	20493.3	3871.12	3354.47
chr15	74915428	74917955	Ly6c2	chr15	-	74938590	74942379	1	281.718	126.558	170.75	124.7	466.396	170.726	102.494
chr13	23822191	23823050	Hist1h1c	chr13	+	23830675	23832236	80937	60701.3	65197.3	74534.9	32956.8	122412	78548.1	50321.4
chr6	56559325	56560320	Lsm5	chr6	-	56651056	56654693	2182	5368.48	4259.48	4639.87	2108.9	7830.33	5138.64	3050.41
chr7	18970450	18971051	Psg18	chr7	-	18931156	18940356	1	468.863	805.986	227.333	433.95	1536.04	255.589	1044.64
chr17	36178058	36178796	H2-T22	chr17	-	36175353	36179647	2659	4286.62	3379.66	4341.54	2173.38	7564.07	2551.22	3908.95
chr2	119080136	119080940	Rhov	chr2	-	119094936	119096962	3333	2286.96	1306.51	1266.3	1217.73	4231.14	1166.69	1369.93
chr19	4047813	4048530	Gstp2	chr19	-	4040287	4042221	262	3428.54	2706.13	1768.08	1475.92	4885.75	2341.41	1943.95
chr19	4045727	4046708	Gstp2	chr19	-	4040287	4042221	262	3428.54	2706.13	1768.08	1475.92	4885.75	2341.41	1943.95
chr8	73956450	73957610	Ankle1	chr8	+	73929910	73933803	7317	5099.31	4116.76	2441.31	4831.88	15988.1	6125.94	2772.54
chrX	15896147	15896614	Cypt1	chrX	+	16099997	16100815	1	1	118.432	1	1	3.28883	9.66686	176.951
chr19	4033555	4035197	Gstp1	chr19	-	4035410	4037912	116654	43598.6	55637.3	65299.8	36307.7	118219	64824.1	29187.7
chr19	4035638	4037001	Gstp1	chr19	-	4035410	4037912	116654	43598.6	55637.3	65299.8	36307.7	118219	64824.1	29187.7
chr6	85784321	85785099	Nat8	chr6	-	85780380	85781884	4768	1209.48	2079.65	2233.75	1224.05	3985.48	1529.26	2424.39
chr6	85793396	85794373	Nat8	chr6	-	85780380	85781884	4768	1209.48	2079.65	2233.75	1224.05	3985.48	1529.26	2424.39
chr17	29239545	29245871	Cdkn1a	chr17	+	29227930	29237667	23777	381795	81459	272106	38471.7	124788	92098.7	22947
chr17	6261603	6262454	Tmem181a	chr17	+	6270474	6305783	4957	468.863	1074.14	170.75	495.8	1583.35	1019.36	914.449
chr3	8244506	8247013	Gm6194	chr3	-	8461386	8463098	2361	1141.79	317.254	446.684	248.4	789.503	170.726	403.234
chr1	88375341	88376284	Ptma	chr1	+	88423310	88427273	31019	23707.5	17025	27631	11423	35936.8	21640.7	9623
chr2	121299274	121300217	Mfap1b	chr2	-	121287401	121299759	12146	17175.7	7868.16	8631.76	4093.36	12733.4	6107.89	6758.69
chr7	38878581	38879315	Ccne1	chr7	-	38883002	38892509	10838	13908.3	8194.11	7419.92	6385.5	19753.2	11859.8	5554.07
chr11	101342099	101343130	Rnd2	chr11	+	101329651	101332620	1	2094.24	1563.13	1489.02	928.749	2870.43	624.292	1436.9
chr15	57924443	57925320	Atad2	chr15	-	57925601	57966637	11798	20284.3	25729	24797.5	19489.8	59329.8	36713.5	20746.6
chr15	98763845	98765305	Tuba1b	chr15	-	98761861	98764821	19608	22329.8	15467.6	17989.4	13130.3	39959.1	19024.8	11844.6
chr18	82396499	82397584	Galr1	chr18	-	82561887	82576169	3541	5268.54	5647.04	3098.15	1695.69	5087.55	6569.4	5723.37
chr12	33172726	33173746	2010109K11Rik	chr12	+	33063653	33067808	10152	14441.8	6444.95	9665.91	2527.64	7554.91	5341.59	3651.89
chr12	32990874	32991984	2010109K11Rik	chr12	+	33063653	33067808	10152	14441.8	6444.95	9665.91	2527.64	7554.91	5341.59	3651.89
chr17	87970315	87971499	Epcam	chr17	+	88035318	88050467	7553	7202.9	5832.5	5305.14	2103.9	6277.36	5053.42	7943.77
chrX	62831272	62832195	Ctag2	chrX	+	62300818	62302192	1181	1	192.876	55.1755	146.282	435.878	170.726	241.425
chrX	62119513	62120344	Ctag2	chrX	+	62300818	62302192	1181	1	192.876	55.1755	146.282	435.878	170.726	241.425
chrX	62826281	62827174	Ctag2	chrX	+	62300818	62302192	1181	1	192.876	55.1755	146.282	435.878	170.726	241.425
chr17	35184244	35185342	Msh5	chr17	-	35165549	35183668	21586	23092.3	17557.5	19369.6	12054.4	35772.4	20057.9	16650.7
chr2	58602990	58603691	Upp2	chr2	+	58607595	58643079	392236	42621.5	205241	13558.6	94355.6	277965	136201	479766
chr2	58595459	58596632	Upp2	chr2	+	58607595	58643079	392236	42621.5	205241	13558.6	94355.6	277965	136201	479766
chr2	58594101	58595003	Upp2	chr2	+	58607595	58643079	392236	42621.5	205241	13558.6	94355.6	277965	136201	479766
chr2	58606872	58607933	Upp2	chr2	+	58607595	58643079	392236	42621.5	205241	13558.6	94355.6	277965	136201	479766
chr14	61005400	61006367	Fam123a	chr14	+	60997122	60999840	2806	3137.87	1562.61	1545.12	1024.02	2981.82	2541.47	711.461
chr8	125715516	125716672	Dpep1	chr8	+	125710134	125725713	17028	7450.17	8235	7935.91	5332.2	15302.2	7854.62	9233.66
chr7	134179566	134180434	Kif22	chr7	-	134171244	134185934	15446	5209.61	14402.4	11790.3	10584.2	30049.9	18007.1	12921.6
chr2	4908306	4909805	Ucma	chr2	+	4897167	4906794	11801	4403.29	4270.89	2917.09	1169.57	3318.66	4896.33	4133.15
chr4	72708521	72709454	Aldoart1	chr4	-	72511616	72513668	1	292.469	602.97	256.227	200.236	559.475	528.595	406.977
chr8	37327879	37329091	Lonrf1	chr8	-	37279117	37312570	52779	106303	32903.9	44607.2	25458.7	70872	31151.9	30888.1
chr8	19908279	19909918	6820431F20Rik	chr8	-	19863863	19893010	4721	5700.56	2125.52	2354.87	913.484	2541.99	1643.73	1392.8
chr8	19885630	19887907	6820431F20Rik	chr8	-	19863863	19893010	4721	5700.56	2125.52	2354.87	913.484	2541.99	1643.73	1392.8
chr8	19868212	19874713	6820431F20Rik	chr8	-	19863863	19893010	4721	5700.56	2125.52	2354.87	913.484	2541.99	1643.73	1392.8
chr8	19880395	19882025	6820431F20Rik	chr8	-	19863863	19893010	4721	5700.56	2125.52	2354.87	913.484	2541.99	1643.73	1392.8
chr8	19916862	19933476	6820431F20Rik	chr8	-	19863863	19893010	4721	5700.56	2125.52	2354.87	913.484	2541.99	1643.73	1392.8
chr8	19877847	19880244	6820431F20Rik	chr8	-	19863863	19893010	4721	5700.56	2125.52	2354.87	913.484	2541.99	1643.73	1392.8
chr8	19864361	19867964	6820431F20Rik	chr8	-	19863863	19893010	4721	5700.56	2125.52	2354.87	913.484	2541.99	1643.73	1392.8
chr8	19859338	19864291	6820431F20Rik	chr8	-	19863863	19893010	4721	5700.56	2125.52	2354.87	913.484	2541.99	1643.73	1392.8
chr8	19875011	19877565	6820431F20Rik	chr8	-	19863863	19893010	4721	5700.56	2125.52	2354.87	913.484	2541.99	1643.73	1392.8
chr8	19853015	19858902	6820431F20Rik	chr8	-	19863863	19893010	4721	5700.56	2125.52	2354.87	913.484	2541.99	1643.73	1392.8
chr8	19890680	19902691	6820431F20Rik	chr8	-	19863863	19893010	4721	5700.56	2125.52	2354.87	913.484	2541.99	1643.73	1392.8
chr8	19888894	19890625	6820431F20Rik	chr8	-	19863863	19893010	4721	5700.56	2125.52	2354.87	913.484	2541.99	1643.73	1392.8
chr8	19883806	19885412	6820431F20Rik	chr8	-	19863863	19893010	4721	5700.56	2125.52	2354.87	913.484	2541.99	1643.73	1392.8
chr15	75226454	75228217	9030619P08Rik	chr15	-	75258035	75262259	5429	898.102	3579.27	2973.91	1176.15	3270.98	3061.13	6123.52
chr15	75186426	75187357	9030619P08Rik	chr15	-	75258035	75262259	5429	898.102	3579.27	2973.91	1176.15	3270.98	3061.13	6123.52
chr11	102610508	102611728	Adam11	chr11	+	102622752	102641576	25735	33527.4	20698.5	29118.3	14385.5	39965.2	23046.9	15560.8
chr8	73718441	73719928	Haus8	chr8	-	73775022	73796489	18645	30045.4	21683.6	24203.2	17626.1	48712.7	22598	17165.6
[truncated: 7,398 more rows]

## Sheet: EGR1-36hrs_A-overlap
			NB: UNFILTERED PEAKS
[truncated: 279 more rows]

## Sheet: EGR1-36hrs_C-overlap
			NB: UNFILTERED PEAKS
[truncated: 1,268 more rows]
