# Supplementary material for: Temporal mapping of CEBPA and CEBPB binding during liver regeneration reveals dynamic occupancy and specific regulatory codes for homeostatic and cell cycle gene batteries
Source: HighWire-hosted journal article supplement (doi:10.1101/gr.146399.112), 2013-02-12
Supplement: Supp_Table_S10.xlsx [file Supp_Table_S10.xlsx]

## Sheet: Sheet1
Jakobsen_Table S10
C/EBP ChIP qPCR primers
Symbol/alias	Symbol/ Name of Associated Gene	Role	Forward	Reverse
Pepck	Pck1, phosphoenolpyruvate carboxykinase 1, cytosolic	Positive ChIP validation	TGGGAGTGACACCTCACAGC	ATTGTCAGGTGGGGGTCAAG	(From: White et al. 2005)
Mamstr	Mamstr, MEF2 activating motif and SAP domain containing transcriptional regulator	Negative ChIP validation	GGGACCAAAGCGATGCTCCT	CTGGGCTTCGGCCGTTCTC
Cmbl	Cmbl, carboxymethylenebutenolidase-like	ChIP validation standard	CCCATGGATCTGAATTTTGCAATTC	TCCTAACCAATAACCCGTGACC
p21	Cdkn1a, cyclin-dependent kinase inhibitor 1A (P21)	ChIP validation	TCAGTCTGGTTTCCCAACATAGG	CACGATGAGCCCAGGCTTC
Ece2	Ece2, endothelin converting enzyme 2	ChIP validation	GGGAGGGTGTGTCTCACATTC	CAGCCCGTCACTGTGAGTG
Cdk19	Cdk19, cyclin-dependent kinase 19	ChIP validation	TCGACCTCAAATCCGCAACG	TAGCCAGGTCTAGTGGTACATG
Elf1	Elf1, E74-like factor 1	ChIP validation	AGCAGAGTGGCTGAGTGGTAG	CTGCTACAAGCACTGCTGTGAC
POL2 ChIP qPCR primers
Symbol/alias	Symbol/ Name of Associated Gene	Role	Forward	Reverse
Beta-act	Actb/actin, beta	Positive POL2 ChIP validation, exon-intron spanning	GATAGTTCGCCATGGATGACGAT	GACGACCAGCGCAGCGATA
Chr_12_desert1	Gene desert region on chromosome 12	Negative ChIP validation	TAGCTTTCGACAGAGGTCCTAAG	CCGAAGGTGGCCGGTTGT
EGR1 ChIP qPCR primers
Symbol/alias	Name/Associated Gene	Role/Cluster	Forward	Reverse
Nab1	Ngfi-A binding protein 1	No CEBP peak, positive EGR1 ChIP validation	CTGTCACATCGGGAGATTCC	CGGCGAATGGAGCAAGAGC
Egfr	epidermal growth factor receptor	No CEBP peak, positive EGR1 ChIP validation	CGGGGCTCTTGACTGCTG	TGAGCGCAGGAAAGTGAGGC
Per1	period homolog 1	No CEBP peak, positive EGR1 ChIP validation	CTACGCCTGCGTACAAGTCG	ACTTACCCAATACTGCGGAGTC
Eif1a	eukaryotic translation initiation factor 1A	C	AATGGGCACTGTTACTCAACTGTC	AATACCTTGTCATTCCAGGTCATCG
Mcart1	mitochondrial carrier triple repeat 1	C	CACAGCAAACATTTGCACAATGC	ACAGGTCAAGGGATTTCTCCC
Fbxo9	f-box protein 9	C	ACGGGCAGCTTGCTCAACAC	GCTAACTGCCAGGGTCATTTCC
Pter	phosphotriesterase related	C	CCCATGAGCTGCTATTGTGG	CCGTGTGAAGTATTTGTTCAAGTGT
Smg7	Smg-7 homolog, nonsense mediated mRNA decay factor	A	AGTACAATGGCCCCTATCTTCC	GGCTCTCTTTCCCGTGAGTG
Palm	paralemmin	A	GCCCTCCCTGGTCCTCAAC	CAAGGAGTCGCACCTTCTGG
Nab2	Ngfi-A binding protein 2	A	CACGCCGGATGCACAGC	ACAGGAGTAGGAGTGGTGCAG
Fam134b	family with sequence similarity 134, member B	A	CTATAGAGTGGAAGGCGTTATGC	TTTGAGTCACGGGGAAGTTGG
Cpsf6	cleavage and polyadenylation specific factor 6	A	TCACAGGCCCGTTTCCACAG	GCTTCCAGGACTTCTGCTGAC
Dpys	dihydropyrimidinase	A	CGTGCGTGGGCACTGCTGTGTAC	GACGCTGTACACAAATCCTCAG
AK15	AK157180	A	TAGCCACACTCTGTCGAACTGG	ATCTGACAAGTGATCAGGACCTTG
Sequential ChIP qPCR primers
Symbol/alias	Name/Associated Gene	Role/Cluster	Forward	Reverse
Sfi2	Highly represented genomic region on chr. 11, proximal to	No CEBP peak, negative ChIP validation	TGGGAGACATAACGATGGCAC	CCTCAGTGATGAGTGTGTGTAG
	Sfi1 homolog, spindle assembly associated (yeast)
Pah	phenylalanine hydroxylase	C	ACTCAGCCCTGTGAGCATGAAG	GTTGAAGATTTCCCAACCTTTGCTAG
Foxa2	forkhead box A2	C	ACCCAAGTGCACAGAGAACATG	CGTCTTCCTATGCAGGAAACTG
Onecut1	one cut domain, family member 1	C	GGGTGTTAGCAAGAGCCAAGC	TTGTGGCATGTTGCAATCTGACAG
Ddc	dopa decarboxylase	C	TGGCGACACAACTGTGAACTTG	AGAAATGGGTCAGTTCAAAGCATCG
Irs	Irs1/insulin receptor substrate 1	C	GTCCAAAAGAAGGGAAAGGTAATCAG	CTGGAACAGAGCCATACATTGTG
Hnf4a	hepatic nuclear factor 4, alpha	C	CTGGAAGCCAATATGCTGTTGC	GTTTGTGGACAGCTCTAATTCCAG
Bach2	BTB and CNC homology 2	C	TTATGCACAACATTCTCGGACATC	CGAGTTCCCAAGTTCAGTGTC
Val3pa	Holliday junction recognition protein	C	CCTTCAGGAGAGCCTTTGTTATG	ACCATGCTGCACTTTCCTCTG
Rora	RAR-related orphan receptor alpha	C	GACCCGCTCAGAGAGTTTGC	GATCTCAGCTCAAAGGTGATGATG
Cbx5	chromobox 5	A	GCTACCGCCGCCTTCTGC	AAAAGGTCCAAGCCCAGGATTG
Slbp	stem-loop binding protein	A	CATGGCGGCAGAAGTCTGAAGG	CTGTTGCCGAGTGAAGTGCTTG
Nuf2	NUF2, NDC80 kinetochore complex component, homolog (S. cerevisiae)	A	CAGATCAGCGGAATCATTCTTCAG	ACTGCTGCGCTTCCTGGTCTGG
Hjurp	Holliday junction recognition protein	A	CTTAAGCTGCTGATGCAGCCTG	GGGCAGAGAGCCACGTAC
Mad2L1	MAD2 mitotic arrest deficient-like 1	A	GGGAGGGATTCGGAGTTACAAAGC	GCAGGCGTAATGAGCCCTAAGC
